# Supplementary material for: Multiomic Profiling Identified EGF Receptor Signaling as a Potential Inhibitor of Type I Interferon Response in Models of Oncolytic Therapy by Vesicular Stomatitis Virus
Source: Int J Mol Sci. 2022 May 8;23(9):5244. doi: 10.3390/ijms23095244 (PMC9102229; doi:10.3390/ijms23095244)
Supplement: Supplementary file 1 [file ijms-23-05244-s001.zip]

Archive with 6 entries (6 files):
- Figures S1-S3.pdf
- File_S1.pdf
- Table S1.xlsx
- Table S2.xlsx
- Table S3.xlsx
- Table S4.xlsx
