# Supplementary material for: Multiomic Profiling Identified EGF Receptor Signaling as a Potential Inhibitor of Type I Interferon Response in Models of Oncolytic Therapy by Vesicular Stomatitis Virus
Source: Int J Mol Sci. 2022 May 8;23(9):5244. doi: 10.3390/ijms23095244 (PMC9102229; doi:10.3390/ijms23095244)
Supplement: Supplementary file 1 [file ijms-23-05244-s001.zip › Table S1.xlsx]

## Sheet: results_HOS_de
Table S1. Differentially expressed genes between IFN-treated and untreated samples of HOS cell line. Significance threshold: FDR < 0.05
Gene	Ensemble_id	LogFC	LogCPM	PValue	FDR	Type	Chr	Start	End	Strand	Description
ANKIB1	ENSG00000001629	0.356585	6.79454	3.18501e-05	0.00126413	protein_coding	7	91875548	92030698	+	ankyrin repeat and IBR domain containing 1
LAP3	ENSG00000002549	2.10549	5.72736	8.70892e-99	2.9262e-96	protein_coding	4	17578815	17609595	+	leucine aminopeptidase 3
DBNDD1	ENSG00000003249	-0.356456	3.92598	0.00152076	0.0271594	protein_coding	16	90071273	90086536	-	dysbindin domain containing 1
IBTK	ENSG00000005700	0.362936	6.62769	3.58653e-05	0.00139296	protein_coding	6	82879700	82957471	-	inhibitor of Bruton tyrosine kinase
CCDC124	ENSG00000007080	-0.303918	5.60796	0.00194949	0.0321533	protein_coding	19	18043825	18054800	+	coiled-coil domain containing 124
RPS20	ENSG00000008988	-0.451922	8.98671	1.08959e-07	7.32207e-06	protein_coding	8	56979854	56987069	-	ribosomal protein S20
MASP2	ENSG00000009724	-0.497293	2.35733	0.000243842	0.00686751	protein_coding	1	11086580	11107290	-	mannan binding lectin serine peptidase 2
FAM76A	ENSG00000009780	0.572063	3.14822	1.68899e-06	9.49513e-05	protein_coding	1	28052490	28089633	+	family with sequence similarity 76 member A
ETV7	ENSG00000010030	2.88535	0.279071	2.76468e-24	3.8042e-22	protein_coding	6	36322419	36356164	-	ETS variant transcription factor 7
ZNF200	ENSG00000010539	0.328121	4.17429	0.00159018	0.027916	protein_coding	16	3272325	3286221	-	zinc finger protein 200
TSPAN9	ENSG00000011105	-0.277726	6.65175	0.00207414	0.0336332	protein_coding	12	3186521	3395730	+	tetraspanin 9
MTMR11	ENSG00000014914	0.410481	4.19339	0.000193223	0.00572068	protein_coding	1	149900543	149908791	-	myotubularin related protein 11
BIRC3	ENSG00000023445	0.831332	3.75372	4.65907e-13	4.45789e-11	protein_coding	11	102188215	102210134	+	baculoviral IAP repeat containing 3
EHD2	ENSG00000024422	-0.258133	7.24457	0.00157231	0.0277371	protein_coding	19	48216600	48246391	+	EH domain containing 2
TYMP	ENSG00000025708	1.5532	2.69998	7.1658e-18	8.0884e-16	protein_coding	22	50964181	50968485	-	thymidine phosphorylase
BTN3A1	ENSG00000026950	1.19047	4.51637	5.18442e-19	6.13972e-17	protein_coding	6	26402465	26415444	+	butyrophilin subfamily 3 member A1
IKZF2	ENSG00000030419	0.709181	1.75624	1.47844e-05	0.000657071	protein_coding	2	213864429	214017151	-	IKAROS family zinc finger 2
PNPLA6	ENSG00000032444	-0.264227	6.97908	0.00353336	0.0485266	protein_coding	19	7598890	7626650	+	patatin like phospholipase domain containing 6
ZCCHC8	ENSG00000033030	0.350139	5.48834	0.000199567	0.00586047	protein_coding	12	122957417	122985518	-	zinc finger CCHC-type containing 8
UBA6	ENSG00000033178	0.338893	6.53943	0.000293058	0.00784092	protein_coding	4	68478370	68566897	-	ubiquitin like modifier activating enzyme 6
TMSB10	ENSG00000034510	-0.33239	8.29192	0.000233884	0.00663883	protein_coding	2	85132749	85133795	+	thymosin beta 10
PI4K2B	ENSG00000038210	0.455718	4.80243	1.88071e-05	0.00080392	protein_coding	4	25162263	25280714	+	phosphatidylinositol 4-kinase type 2 beta
MAT2B	ENSG00000038274	0.272206	6.84991	0.000943261	0.0190872	protein_coding	5	162930120	162946342	+	methionine adenosyltransferase 2B
TNC	ENSG00000041982	0.431868	6.99479	7.04672e-06	0.000348668	protein_coding	9	117782806	117880536	-	tenascin C
DCUN1D1	ENSG00000043093	0.312998	5.31598	0.000616849	0.0141689	protein_coding	3	182655862	182703741	-	defective in cullin neddylation 1 domain containing 1
JADE2	ENSG00000043143	0.327535	5.93444	0.000200816	0.00587327	protein_coding	5	133860003	133918918	+	jade family PHD finger 2
ARAP2	ENSG00000047365	0.472626	4.49113	6.40773e-06	0.000319238	protein_coding	4	35949843	36246131	-	ArfGAP with RhoGAP domain, ankyrin repeat and PH domain 2
SCML1	ENSG00000047634	0.317257	5.41089	0.000848017	0.017629	protein_coding	X	17755588	17773105	+	Scm polycomb group protein like 1
GOPC	ENSG00000047932	0.303804	6.31202	0.000258487	0.00710004	protein_coding	6	117639374	117923691	-	golgi associated PDZ and coiled-coil motif containing
USP28	ENSG00000048028	0.347127	5.8557	4.32899e-05	0.00165027	protein_coding	11	113668596	113746292	-	ubiquitin specific peptidase 28
HDAC9	ENSG00000048052	0.406004	2.97265	0.00114893	0.0220318	protein_coding	7	18126572	19042039	+	histone deacetylase 9
NFE2L3	ENSG00000050344	0.281715	5.92044	0.00163495	0.02846	protein_coding	7	26191860	26226745	+	nuclear factor, erythroid 2 like 3
LIMA1	ENSG00000050405	0.280844	8.31651	0.000694227	0.0153367	protein_coding	12	50569571	50677329	-	LIM domain and actin binding 1
SIKE1	ENSG00000052723	0.262627	6.07259	0.00284445	0.0419354	protein_coding	1	115312100	115323306	-	suppressor of IKBKE 1
AKR7A2	ENSG00000053371	-0.322378	4.7884	0.00132899	0.0245541	protein_coding	1	19630459	19638640	-	aldo-keto reductase family 7 member A2
USE1	ENSG00000053501	-0.366961	3.51804	0.00109314	0.0211534	protein_coding	19	17326155	17330638	+	unconventional SNARE in the ER 1
PHPT1	ENSG00000054148	-0.428522	5.0252	1.14417e-05	0.000534983	protein_coding	9	139743176	139745488	+	phosphohistidine phosphatase 1
TAB2	ENSG00000055208	0.240024	7.22472	0.00297906	0.0430591	protein_coding	6	149539777	149732749	+	TGF-beta activated kinase 1 (MAP3K7) binding protein 2
EIF2AK2	ENSG00000055332	1.92792	8.35613	1.12867e-105	4.18127e-103	protein_coding	2	37326353	37384208	-	eukaryotic translation initiation factor 2 alpha kinase 2
RC3H2	ENSG00000056586	0.306745	6.45259	0.000592609	0.0137432	protein_coding	9	125606835	125667620	-	ring finger and CCCH-type domains 2
PARP12	ENSG00000059378	1.5599	6.57757	3.43734e-52	7.88296e-50	protein_coding	7	139723544	139763521	-	poly(ADP-ribose) polymerase family member 12
CDK17	ENSG00000059758	0.29255	5.62456	0.000757424	0.0162197	protein_coding	12	96672039	96794338	-	cyclin dependent kinase 17
OGFR	ENSG00000060491	0.686568	7.01443	3.79085e-16	3.99782e-14	protein_coding	20	61436187	61445352	+	opioid growth factor receptor
GPBP1	ENSG00000062194	0.251998	6.54556	0.00215141	0.0346528	protein_coding	5	56469775	56560506	+	GC-rich promoter binding protein 1
RPL18	ENSG00000063177	-0.347372	8.67801	2.04617e-05	0.000864416	protein_coding	19	49118585	49122793	-	ribosomal protein L18
GPC1	ENSG00000063660	-0.465817	7.41135	9.35734e-08	6.34718e-06	protein_coding	2	241375088	241407493	+	glypican 1
CASP8	ENSG00000064012	0.527457	5.00282	2.97786e-08	2.12991e-06	protein_coding	2	202098166	202152434	+	caspase 8
TMEM161A	ENSG00000064545	-0.323427	4.84719	0.000782213	0.0167142	protein_coding	19	19229978	19249322	-	transmembrane protein 161A
UHRF1BP1	ENSG00000065060	0.627457	6.75141	9.59895e-13	9.06442e-11	protein_coding	6	34759857	34850915	+	UHRF1 binding protein 1
NTN1	ENSG00000065320	-0.4221	3.33275	0.000727822	0.0157183	protein_coding	17	8924859	9147317	+	netrin 1
NDUFB4	ENSG00000065518	-0.273786	5.67709	0.00144604	0.0261156	protein_coding	3	120315156	120321347	+	NADH:ubiquinone oxidoreductase subunit B4
MTHFD2	ENSG00000065911	0.463738	6.33007	0.000417528	0.0105278	protein_coding	2	74425689	74444692	+	methylenetetrahydrofolate dehydrogenase (NADP+ dependent) 2, methenyltetrahydrofolate cyclohydrolase
ZBTB11	ENSG00000066422	0.285185	6.02471	0.000640186	0.0145788	protein_coding	3	101367733	101396339	-	zinc finger and BTB domain containing 11
KIF26A	ENSG00000066735	-0.498425	6.30692	0.00176101	0.0301815	protein_coding	14	104605060	104647231	+	kinesin family member 26A
SP100	ENSG00000067066	2.11847	7.33442	1.02507e-105	3.89743e-103	protein_coding	2	231280657	231408805	+	SP100 nuclear antigen
KLF6	ENSG00000067082	0.336201	6.48055	5.66861e-05	0.0020475	protein_coding	10	3818188	3827473	-	Kruppel like factor 6
IFI35	ENSG00000068079	3.02632	5.47005	2.79222e-85	8.58341e-83	protein_coding	17	41158742	41166473	+	interferon induced protein 35
INPP5A	ENSG00000068383	-0.358565	4.81003	0.000188461	0.00559113	protein_coding	10	134351324	134596979	+	inositol polyphosphate-5-phosphatase A
REEP1	ENSG00000068615	-0.514841	2.97834	0.000102234	0.00334181	protein_coding	2	86441116	86565206	-	receptor accessory protein 1
PITX1	ENSG00000069011	-0.317107	5.20323	0.0018532	0.0311337	protein_coding	5	134363425	134370503	-	paired like homeodomain 1
GAL	ENSG00000069482	-0.448824	4.39807	0.00115024	0.0220318	protein_coding	11	68451247	68458643	+	galanin and GMAP prepropeptide
FSTL3	ENSG00000070404	-0.350549	5.90591	8.01982e-05	0.00271996	protein_coding	19	676392	683385	+	follistatin like 3
DGCR2	ENSG00000070413	-0.260848	6.4258	0.00219601	0.0351362	protein_coding	22	19023795	19109967	-	DiGeorge syndrome critical region gene 2
RNF126	ENSG00000070423	-0.304401	5.76943	0.00260774	0.0393695	protein_coding	19	647526	663277	-	ring finger protein 126
ASNS	ENSG00000070669	0.58007	5.20681	0.00182742	0.030844	protein_coding	7	97481430	97501854	-	asparagine synthetase (glutamine-hydrolyzing)
AP3M2	ENSG00000070718	0.283919	5.12676	0.00291519	0.0425012	protein_coding	8	42010464	42029191	+	adaptor related protein complex 3 subunit mu 2
PABPC1	ENSG00000070756	-0.359323	10.3505	1.86636e-05	0.000800155	protein_coding	8	101698044	101735037	-	poly(A) binding protein cytoplasmic 1
ZFYVE26	ENSG00000072121	0.395136	6.6275	2.33383e-06	0.000126289	protein_coding	14	68194091	68283307	-	zinc finger FYVE-type containing 26
SPEG	ENSG00000072195	-0.369631	4.38215	0.000930283	0.0189538	protein_coding	2	220299568	220363009	+	striated muscle enriched protein kinase
NFATC3	ENSG00000072736	0.291924	5.22403	0.00257707	0.0391101	protein_coding	16	68118654	68263162	+	nuclear factor of activated T cells 3
TUBE1	ENSG00000074935	0.424229	4.34606	5.77979e-05	0.00207662	protein_coding	6	112391980	112408732	-	tubulin epsilon 1
ZNF37A	ENSG00000075407	0.328186	5.64906	0.00157995	0.0277703	protein_coding	10	38383264	38414472	+	zinc finger protein 37A
FSCN1	ENSG00000075618	-0.386476	7.2135	6.44035e-05	0.00226952	protein_coding	7	5632439	5646286	+	fascin actin-bundling protein 1
RBM7	ENSG00000076053	0.388891	5.46796	1.44233e-05	0.000649326	protein_coding	11	114270752	114284925	+	RNA binding motif protein 7
MBNL3	ENSG00000076770	0.555573	2.60426	0.000200261	0.00586892	protein_coding	X	131503345	131623996	-	muscleblind like splicing regulator 3
USP33	ENSG00000077254	0.312479	6.75594	0.000173259	0.0052001	protein_coding	1	78161672	78225537	-	ubiquitin specific peptidase 33
FAM76B	ENSG00000077458	0.282686	4.99631	0.00285872	0.0420513	protein_coding	11	95502106	95523573	-	family with sequence similarity 76 member B
LAMP3	ENSG00000078081	2.12307	3.12309	1.28103e-20	1.5819e-18	protein_coding	3	182840001	182881627	-	lysosomal associated membrane protein 3
FAP	ENSG00000078098	-0.84699	1.95199	3.20158e-08	2.27864e-06	protein_coding	2	163027194	163101661	-	fibroblast activation protein alpha
SLC1A3	ENSG00000079215	0.470428	4.37462	0.000725733	0.0157183	protein_coding	5	36606457	36688436	+	solute carrier family 1 member 3
SP140	ENSG00000079263	0.914666	0.684081	3.45214e-06	0.000179412	protein_coding	2	231067826	231223762	+	SP140 nuclear body protein
RSBN1	ENSG00000081019	0.296297	4.41282	0.00318623	0.0450436	protein_coding	1	114304454	114355098	-	round spermatid basic protein 1
COL4A4	ENSG00000081052	0.630484	0.976383	0.00176346	0.0301827	protein_coding	2	227867427	228028829	-	collagen type IV alpha 4 chain
ZNF510	ENSG00000081386	0.277171	4.77667	0.0034386	0.0476327	protein_coding	9	99518147	99540411	-	zinc finger protein 510
PGR	ENSG00000082175	0.683609	1.45918	0.000130087	0.00409476	protein_coding	11	100900355	101001255	-	progesterone receptor
PALB2	ENSG00000083093	0.308795	4.75781	0.00138145	0.0253611	protein_coding	16	23614488	23652631	-	partner and localizer of BRCA2
ZNF416	ENSG00000083817	0.609812	2.69792	1.37885e-05	0.000628443	protein_coding	19	58082934	58090295	-	zinc finger protein 416
RPS5	ENSG00000083845	-0.352615	8.58822	2.91419e-05	0.00117609	protein_coding	19	58897767	58906173	+	ribosomal protein S5
CHMP2B	ENSG00000083937	0.313807	5.35809	0.000792565	0.0167929	protein_coding	3	87276421	87304698	+	charged multivesicular body protein 2B
NKAIN1	ENSG00000084628	-0.712802	0.105438	0.00181632	0.0308007	protein_coding	1	31652592	31712401	-	sodium/potassium transporting ATPase interacting 1
WDFY1	ENSG00000085449	0.287312	6.8583	0.000447682	0.0110945	protein_coding	2	224720433	224810104	-	WD repeat and FYVE domain containing 1
DNAJA1	ENSG00000086061	0.373496	7.61128	0.00071162	0.0155429	protein_coding	9	33025209	33039905	+	DnaJ heat shock protein family (Hsp40) member A1
CHMP5	ENSG00000086065	0.586024	6.05263	1.79359e-11	1.5898e-09	protein_coding	9	33264940	33281977	+	charged multivesicular body protein 5
SNX10	ENSG00000086300	0.521606	1.7006	0.00187452	0.0314188	protein_coding	7	26331541	26413949	+	sorting nexin 10
FTL	ENSG00000087086	-0.292389	8.65993	0.000744884	0.016015	protein_coding	19	49468558	49470135	+	ferritin light chain
TGDS	ENSG00000088451	0.365034	3.48661	0.00317821	0.0450184	protein_coding	13	95226308	95248511	-	TDP-glucose 4,6-dehydratase
ZNF343	ENSG00000088876	0.493083	3.8727	1.65128e-05	0.000725156	protein_coding	20	2462463	2505348	-	zinc finger protein 343
EBF4	ENSG00000088881	-0.530571	2.61664	0.00183848	0.0309584	protein_coding	20	2673524	2740753	+	EBF family member 4
RPL6	ENSG00000089009	-0.352016	9.18868	3.27535e-05	0.00129296	protein_coding	12	112842994	112856642	-	ribosomal protein L6
OAS1	ENSG00000089127	5.82441	6.26087	3.64572e-295	8.77889e-292	protein_coding	12	113344582	113369990	+	2'-5'-oligoadenylate synthetase 1
RPLP0	ENSG00000089157	-0.370972	10.7204	7.79682e-06	0.000379288	protein_coding	12	120634489	120639038	-	ribosomal protein lateral stalk subunit P0
ZBTB25	ENSG00000089775	0.296476	5.07269	0.00321711	0.0453471	protein_coding	14	64915824	64971931	-	zinc finger and BTB domain containing 25
ZNF268	ENSG00000090612	0.450933	4.26858	1.76717e-05	0.000766731	protein_coding	12	133707570	133783698	+	zinc finger protein 268
AARS	ENSG00000090861	0.324805	7.76415	6.92865e-05	0.00240637	protein_coding	16	70286198	70323446	-	alanyl-tRNA synthetase 1
CPA1	ENSG00000091704	-0.908322	0.485509	0.000286261	0.00767329	protein_coding	7	130020180	130027955	+	carboxypeptidase A1
PSME1	ENSG00000092010	1.12037	6.617	7.9134e-32	1.28464e-29	protein_coding	14	24605367	24608176	+	proteasome activator subunit 1
RNF31	ENSG00000092098	0.52338	4.5554	4.16029e-07	2.60207e-05	protein_coding	14	24615892	24629870	+	ring finger protein 31
FKBP5	ENSG00000096060	0.283213	7.17367	0.000481334	0.011786	protein_coding	6	35541362	35696360	-	FKBP prolyl isomerase 5
DSP	ENSG00000096696	1.03317	5.18588	8.30617e-22	1.0715e-19	protein_coding	6	7541808	7586950	+	desmoplakin
IFT74	ENSG00000096872	0.541458	4.50162	1.61951e-06	9.17597e-05	protein_coding	9	26947037	27062928	+	intraflagellar transport 74
EFNA2	ENSG00000099617	-0.666013	0.727334	0.00171394	0.0295502	protein_coding	19	1286153	1301430	+	ephrin A2
ATP5D	ENSG00000099624	-0.248134	6.46388	0.00290199	0.0423867	protein_coding	19	1241749	1244824	+	ATP synthase F1 subunit delta
NDUFB7	ENSG00000099795	-0.377449	5.65568	1.36384e-05	0.000623568	protein_coding	19	14676890	14682874	-	NADH:ubiquinone oxidoreductase subunit B7
TECR	ENSG00000099797	-0.326554	6.37758	0.000580688	0.0135319	protein_coding	19	14627897	14676792	+	trans-2,3-enoyl-CoA reductase
TIMM13	ENSG00000099800	-0.361218	5.84119	0.000100883	0.00331264	protein_coding	19	2425622	2427892	-	translocase of inner mitochondrial membrane 13
POLR2E	ENSG00000099817	-0.33967	6.93781	0.000122347	0.00390214	protein_coding	19	1086594	1095598	-	RNA polymerase II subunit E
PALM	ENSG00000099864	-0.427888	3.7389	0.00100837	0.0198487	protein_coding	19	708953	748329	+	paralemmin
LGALS1	ENSG00000100097	-0.248209	8.16567	0.00301606	0.0433592	protein_coding	22	38071615	38075813	+	galectin 1
EIF3L	ENSG00000100129	-0.359558	8.42506	1.94866e-05	0.000830507	protein_coding	22	38244875	38285414	+	eukaryotic translation initiation factor 3 subunit L
GTPBP1	ENSG00000100226	0.312925	5.87801	0.00024642	0.00692661	protein_coding	22	39101728	39134304	+	GTP binding protein 1
CYB5R3	ENSG00000100243	-0.23653	7.59604	0.00322903	0.0454707	protein_coding	22	43013846	43045574	-	cytochrome b5 reductase 3
RPL3	ENSG00000100316	-0.277992	9.97984	0.00096586	0.0193547	protein_coding	22	39708887	39716394	-	ribosomal protein L3
APOL1	ENSG00000100342	1.79873	3.88026	2.41255e-45	4.97951e-43	protein_coding	22	36649056	36663576	+	apolipoprotein L1
CERK	ENSG00000100422	-0.30525	5.75989	0.000437397	0.0108835	protein_coding	22	47080308	47134158	-	ceramide kinase
SPTLC2	ENSG00000100596	0.333666	7.55202	0.000299737	0.00796065	protein_coding	14	77972340	78083116	-	serine palmitoyltransferase long chain base subunit 2
LGMN	ENSG00000100600	0.322174	6.20239	0.000329994	0.00857509	protein_coding	14	93170152	93215047	-	legumain
SIX4	ENSG00000100625	0.265508	5.77604	0.00236804	0.0370741	protein_coding	14	61176246	61191066	-	SIX homeobox 4
PCK2	ENSG00000100889	0.785968	5.03093	6.30145e-09	4.79175e-07	protein_coding	14	24563262	24579807	+	phosphoenolpyruvate carboxykinase 2, mitochondrial
PSME2	ENSG00000100911	1.16813	6.41561	1.32803e-42	2.52466e-40	protein_coding	14	24612574	24616779	-	proteasome activator subunit 2
REC8	ENSG00000100918	2.19512	3.91477	7.19534e-62	1.8564e-59	protein_coding	14	24641062	24649463	+	REC8 meiotic recombination protein
C20orf24	ENSG00000101084	-0.400978	4.0719	0.000249347	0.00699527	protein_coding	20	35234137	35240960	+	RAB5 interacting factor
EEF1A2	ENSG00000101210	-0.246496	8.8613	0.00232823	0.0366032	protein_coding	20	62119366	62130505	-	eukaryotic translation elongation factor 1 alpha 2
C20orf27	ENSG00000101220	-0.364554	5.68315	0.00204179	0.033333	protein_coding	20	3734155	3749034	-	chromosome 20 open reading frame 27
TRIB3	ENSG00000101255	0.504553	4.76964	1.07259e-06	6.32524e-05	protein_coding	20	361261	378203	+	tribbles pseudokinase 3
TLDC2	ENSG00000101342	2.79797	1.56922	6.28773e-48	1.3559e-45	protein_coding	20	35504524	35522638	+	TBC/LysM-associated domain containing 2
SAMHD1	ENSG00000101347	2.43834	7.69903	7.42862e-139	3.83317e-136	protein_coding	20	35518632	35580246	-	SAM and HD domain containing deoxynucleoside triphosphate triphosphohydrolase 1
SNTA1	ENSG00000101400	-0.342346	4.36734	0.000741749	0.0159714	protein_coding	20	31995761	32031698	-	syntrophin alpha 1
SMCHD1	ENSG00000101596	0.36928	7.67116	0.000151818	0.00465704	protein_coding	18	2655737	2805015	+	structural maintenance of chromosomes flexible hinge domain containing 1
XIAP	ENSG00000101966	0.275027	5.59844	0.00175252	0.0300717	protein_coding	X	122993574	123047829	+	X-linked inhibitor of apoptosis
PLP2	ENSG00000102007	-0.37435	6.61039	1.46716e-05	0.000656268	protein_coding	X	49028273	49031588	+	proteolipid protein 2
FMR1	ENSG00000102081	0.327431	6.89505	5.84985e-05	0.00207662	protein_coding	X	146993469	147032645	+	FMRP translational regulator 1
PCSK1N	ENSG00000102109	-0.454022	4.63483	0.00206568	0.0336092	protein_coding	X	48689504	48694035	-	proprotein convertase subtilisin/kexin type 1 inhibitor
RP2	ENSG00000102218	0.306674	5.90006	0.00123322	0.0232	protein_coding	X	46696375	46741793	+	RP2 activator of ARL3 GTPase
PORCN	ENSG00000102312	-0.350615	3.91881	0.00356422	0.048765	protein_coding	X	48367350	48379202	+	porcupine O-acyltransferase
RBM3	ENSG00000102317	-0.387955	7.86427	2.80886e-06	0.0001492	protein_coding	X	48432837	48437454	+	RNA binding motif protein 3
FNDC3A	ENSG00000102531	0.262406	6.69941	0.00210549	0.0341032	protein_coding	13	49550048	49783915	+	fibronectin type III domain containing 3A
N4BP1	ENSG00000102921	0.545083	5.90858	4.95064e-10	3.93005e-08	protein_coding	16	48572637	48654059	-	NEDD4 binding protein 1
MMP15	ENSG00000102996	-0.465714	2.70232	0.00051271	0.012305	protein_coding	16	58059470	58080805	+	matrix metallopeptidase 15
MPG	ENSG00000103152	-0.476768	3.91476	3.11812e-05	0.00124449	protein_coding	16	127006	135852	+	N-methylpurine DNA glycosylase
NME4	ENSG00000103202	-0.345268	6.04763	0.000171431	0.00516007	protein_coding	16	446725	460367	+	NME/NM23 nucleoside diphosphate kinase 4
METRN	ENSG00000103260	-0.386348	3.55513	0.000892424	0.018341	protein_coding	16	765115	769655	+	meteorin, glial cell differentiation regulator
STUB1	ENSG00000103266	-0.332681	4.27489	0.00218267	0.0350003	protein_coding	16	730224	732870	+	STIP1 homology and U-box containing protein 1
UBE2I	ENSG00000103275	-0.283567	6.05663	0.00098655	0.0195539	protein_coding	16	1355548	1377019	+	ubiquitin conjugating enzyme E2 I
CPPED1	ENSG00000103381	0.296949	4.99485	0.00323798	0.045521	protein_coding	16	12756919	12897874	-	calcineurin like phosphoesterase domain containing 1
CTSH	ENSG00000103811	-0.45011	3.68265	4.86263e-05	0.00182009	protein_coding	15	79213400	79241916	-	cathepsin H
EHD4	ENSG00000103966	0.468477	7.1703	3.59997e-07	2.28124e-05	protein_coding	15	42190950	42264776	-	EH domain containing 4
NBN	ENSG00000104320	0.343022	6.23964	4.28654e-05	0.00163841	protein_coding	8	90945564	91015456	-	nibrin
SPAG1	ENSG00000104450	0.388106	3.8155	0.000552443	0.0129995	protein_coding	8	101170134	101271506	+	sperm associated antigen 1
TUBB4A	ENSG00000104833	-0.612783	1.06676	0.00182543	0.030844	protein_coding	19	6494330	6502859	-	tubulin beta 4A class IVa
CLASRP	ENSG00000104859	-0.274706	5.92251	0.0015409	0.0274174	protein_coding	19	45542298	45574214	+	CLK4 associating serine/arginine rich protein
C19orf53	ENSG00000104979	-0.300793	5.48887	0.00244785	0.0380286	protein_coding	19	13884982	13889276	+	chromosome 19 open reading frame 53
RPS16	ENSG00000105193	-0.418313	8.93638	2.39762e-07	1.52603e-05	protein_coding	19	39923847	39926588	-	ribosomal protein S16
POLR2I	ENSG00000105258	-0.374219	2.97652	0.00321597	0.0453471	protein_coding	19	36604612	36606248	-	RNA polymerase II subunit I
PRKD2	ENSG00000105287	0.546824	5.61574	4.32906e-08	3.05104e-06	protein_coding	19	47177532	47220384	-	protein kinase D2
APLP1	ENSG00000105290	-0.461826	3.51229	0.000643837	0.0146031	protein_coding	19	36358801	36370693	+	amyloid beta precursor like protein 1
RPS19	ENSG00000105372	-0.247809	8.64272	0.00230713	0.0364299	protein_coding	19	42363988	42376994	+	ribosomal protein S19
GLTSCR2	ENSG00000105373	-0.35347	6.84924	0.000429161	0.0107275	protein_coding	19	48248779	48260315	+	NOP53 ribosome biogenesis factor
NAPA	ENSG00000105402	0.357796	6.44995	1.70824e-05	0.00074406	protein_coding	19	47990894	48018497	-	NSF attachment protein alpha
RABAC1	ENSG00000105404	-0.384442	5.16298	0.000233254	0.00663397	protein_coding	19	42460833	42463542	-	Rab acceptor 1
DKFZP761J1410	ENSG00000105520	-0.344834	4.40506	0.000917383	0.0187473	protein_coding	19	11466062	11476374	+	phospholipid phosphatase related 2
PLEKHA4	ENSG00000105559	1.19105	4.3459	7.19599e-17	7.87633e-15	protein_coding	19	49340354	49371889	-	pleckstrin homology domain containing A4
RPL18A	ENSG00000105640	-0.368288	8.77875	5.74477e-06	0.0002892	protein_coding	19	17970685	17974962	+	ribosomal protein L18a
USF2	ENSG00000105698	-0.276919	5.84858	0.00337697	0.0469591	protein_coding	19	35759881	35770724	+	upstream transcription factor 2, c-fos interacting
CADM4	ENSG00000105767	-0.530229	2.16743	0.00126671	0.0237066	protein_coding	19	44126520	44143991	-	cell adhesion molecule 4
AVL9	ENSG00000105778	0.249736	6.33438	0.00364295	0.049539	protein_coding	7	32535038	33078516	+	AVL9 cell migration associated
GTPBP10	ENSG00000105793	0.32062	4.44268	0.00143091	0.0259394	protein_coding	7	89964537	90020769	+	GTP binding protein 10
BET1	ENSG00000105829	0.328776	4.31571	0.00300306	0.0432154	protein_coding	7	93592074	93633694	-	Bet1 golgi vesicular membrane trafficking protein
NAMPT	ENSG00000105835	0.428471	6.83205	9.73458e-07	5.81179e-05	protein_coding	7	105888731	105926772	-	nicotinamide phosphoribosyltransferase
DNAH11	ENSG00000105877	0.596308	0.583183	0.00266373	0.0399704	protein_coding	7	21582833	21941457	+	dynein axonemal heavy chain 11
ZC3HAV1	ENSG00000105939	0.2986	6.91494	0.000222173	0.00636896	protein_coding	7	138728266	138794465	-	zinc finger CCCH-type containing, antiviral 1
MET	ENSG00000105976	0.283346	7.57992	0.00254382	0.0387705	protein_coding	7	116312444	116438440	+	MET proto-oncogene, receptor tyrosine kinase
CPED1	ENSG00000106034	0.539346	1.45988	0.00262326	0.03948	protein_coding	7	120628731	120937498	+	cadherin like and PC-esterase domain containing 1
PLEKHA8	ENSG00000106086	0.37715	5.64831	5.27523e-05	0.00193935	protein_coding	7	30067020	30170096	+	pleckstrin homology domain containing A8
CHCHD2	ENSG00000106153	-0.282526	7.7221	0.00132117	0.0245035	protein_coding	7	56169262	56174269	-	coiled-coil-helix-coiled-coil-helix domain containing 2
MOSPD3	ENSG00000106330	-0.469274	3.69296	0.00084414	0.0175838	protein_coding	7	100209725	100213007	+	motile sperm domain containing 3
ZNHIT1	ENSG00000106400	-0.313702	5.23893	0.00132538	0.0245187	protein_coding	7	100860949	100867471	+	zinc finger HIT-type containing 1
RARRES2	ENSG00000106538	-0.930846	0.780361	2.3459e-06	0.000126468	protein_coding	7	150035408	150038763	-	retinoic acid receptor responder 2
GIMAP2	ENSG00000106560	1.63857	0.171921	3.73896e-11	3.23476e-09	protein_coding	7	150382785	150390729	+	GTPase, IMAP family member 2
TRIM14	ENSG00000106785	1.95333	6.17258	3.20414e-100	1.15734e-97	protein_coding	9	100831557	100881494	-	tripartite motif containing 14
CORO2A	ENSG00000106789	0.529221	2.5927	0.000234836	0.00665276	protein_coding	9	100883257	100954922	-	coronin 2A
CDC37L1	ENSG00000106993	0.345798	3.688	0.00160283	0.0280699	protein_coding	9	4679559	4708398	+	cell division cycle 37 like 1
DDX58	ENSG00000107201	2.87325	7.20916	2.0766e-213	2.14305e-210	protein_coding	9	32455300	32526322	-	DExD/H-box helicase 58
ABCA2	ENSG00000107331	-0.321725	5.83294	0.000824887	0.0172474	protein_coding	9	139901686	139923367	-	ATP binding cassette subfamily A member 2
CXCL12	ENSG00000107562	-0.781213	1.28119	0.000420674	0.0105519	protein_coding	10	44793038	44881941	-	C-X-C motif chemokine ligand 12
LIPA	ENSG00000107798	0.598692	7.17752	5.70463e-09	4.36087e-07	protein_coding	10	90973326	91174314	-	lipase A, lysosomal acid type
CPEB3	ENSG00000107864	0.476829	2.81305	0.000360456	0.00921748	protein_coding	10	93806449	94050844	-	cytoplasmic polyadenylation element binding protein 3
ACBD5	ENSG00000107897	0.273972	5.0072	0.0035614	0.048765	protein_coding	10	27484146	27531059	-	acyl-CoA binding domain containing 5
RPL28	ENSG00000108107	-0.42655	9.12537	3.21912e-06	0.000169127	protein_coding	19	55896713	55914612	+	ribosomal protein L28
TRIM16L	ENSG00000108448	-0.30358	4.58704	0.00277446	0.0412402	protein_coding	17	18601311	18639431	+	tripartite motif containing 16 like
MED13	ENSG00000108510	0.270942	7.33582	0.000934506	0.0189898	protein_coding	17	60019966	60142643	-	mediator complex subunit 13
HOXB6	ENSG00000108511	-0.379653	5.1732	0.000986372	0.0195539	protein_coding	17	46671639	46682354	-	homeobox B6
LGALS3BP	ENSG00000108679	1.81529	8.97723	2.27966e-31	3.58006e-29	protein_coding	17	76967320	76976191	-	galectin 3 binding protein
DHX58	ENSG00000108771	2.85041	2.54618	4.4131e-67	1.20303e-64	protein_coding	17	40253422	40264751	-	DExH-box helicase 58
RAB34	ENSG00000109113	-0.302823	6.43491	0.0002062	0.0060064	protein_coding	17	27041299	27045447	-	RAB34, member RAS oncogene family
WFS1	ENSG00000109501	-0.455242	6.57045	3.19163e-05	0.00126413	protein_coding	4	6271576	6304992	+	wolframin ER transmembrane glycoprotein
SEPSECS	ENSG00000109618	0.365695	4.47942	0.00144414	0.0261138	protein_coding	4	25121627	25162204	-	Sep (O-phosphoserine) tRNA:Sec (selenocysteine) tRNA synthase
MFSD10	ENSG00000109736	-0.305367	6.42044	0.000706286	0.0154631	protein_coding	4	2932288	2936586	-	major facilitator superfamily domain containing 10
KLF3	ENSG00000109787	0.335786	6.0185	0.00033974	0.0087967	protein_coding	4	38665817	38702663	+	Kruppel like factor 3
UNC93B1	ENSG00000110057	0.783327	6.76957	2.82686e-11	2.4753e-09	protein_coding	11	67758575	67772452	-	unc-93 homolog B1, TLR signaling regulator
ANAPC15	ENSG00000110200	-0.44561	2.10585	0.00358281	0.0489729	protein_coding	11	71817424	71823826	-	anaphase promoting complex subunit 15
BIRC2	ENSG00000110330	0.305515	6.9105	0.000297797	0.00793833	protein_coding	11	102217942	102249401	+	baculoviral IAP repeat containing 2
CBL	ENSG00000110395	0.326158	7.41147	0.000307822	0.00813056	protein_coding	11	119076752	119178859	+	Cbl proto-oncogene
SLC15A3	ENSG00000110446	4.2922	2.29555	2.27598e-117	9.39525e-115	protein_coding	11	60704556	60720002	-	solute carrier family 15 member 3
RPS13	ENSG00000110700	-0.310749	8.69158	0.000235396	0.00665558	protein_coding	11	17095936	17099334	-	ribosomal protein S13
CLEC2B	ENSG00000110852	0.959953	0.592673	7.38802e-05	0.00253277	protein_coding	12	10005583	10022735	-	C-type lectin domain family 2 member B
TSPAN11	ENSG00000110900	-1.30544	1.22658	0.00025656	0.00708752	protein_coding	12	31079362	31149534	+	tetraspanin 11
PARP11	ENSG00000111224	0.458773	3.86444	8.4499e-05	0.00285911	protein_coding	12	3900213	3982608	-	poly(ADP-ribose) polymerase family member 11
DUSP16	ENSG00000111266	0.300074	5.19238	0.00112349	0.0216428	protein_coding	12	12628829	12715317	-	dual specificity phosphatase 16
OAS3	ENSG00000111331	4.69928	8.49599	0	0	protein_coding	12	113376157	113411054	+	2'-5'-oligoadenylate synthetase 3
OAS2	ENSG00000111335	6.1771	7.55171	2.23783e-295	6.46642e-292	protein_coding	12	113416200	113449528	+	2'-5'-oligoadenylate synthetase 2
HCFC2	ENSG00000111727	0.497639	4.00428	2.12478e-06	0.000116284	protein_coding	12	104458235	104498639	+	host cell factor C2
C2CD5	ENSG00000111731	0.310066	5.89885	0.000276809	0.00748959	protein_coding	12	22601517	22697480	-	C2 calcium dependent domain containing 5
BTN3A3	ENSG00000111801	0.92301	5.05824	3.06278e-11	2.66572e-09	protein_coding	6	26440700	26453643	+	butyrophilin subfamily 3 member A3
ASF1A	ENSG00000111875	0.293528	5.39869	0.00116776	0.0222583	protein_coding	6	119215384	119230332	+	anti-silencing function 1A histone chaperone
HINT3	ENSG00000111911	0.503717	4.20797	3.36383e-06	0.000175676	protein_coding	6	126277927	126301387	+	histidine triad nucleotide binding protein 3
NCOA7	ENSG00000111912	0.639522	6.02587	1.16818e-12	1.09596e-10	protein_coding	6	126102307	126252266	+	nuclear receptor coactivator 7
SIM1	ENSG00000112246	0.407615	4.98706	4.92135e-05	0.0018373	protein_coding	6	100832891	100912805	-	SIM bHLH transcription factor 1
AIM1	ENSG00000112297	0.433485	5.01215	4.67831e-05	0.00175564	protein_coding	6	106959730	107018326	+	crystallin beta-gamma domain containing 1
C6orf62	ENSG00000112308	0.518959	7.5138	3.45193e-10	2.80188e-08	protein_coding	6	24705089	24721064	-	chromosome 6 open reading frame 62
TRIM38	ENSG00000112343	1.01731	5.00457	1.73296e-16	1.84101e-14	protein_coding	6	25963030	25987384	+	tripartite motif containing 38
DNPH1	ENSG00000112667	-0.440698	4.81297	7.43477e-06	0.000365366	protein_coding	6	43193367	43197222	-	2'-deoxynucleoside 5'-phosphate N-hydrolase 1
VEGFA	ENSG00000112715	0.368792	5.67883	3.98835e-05	0.00153255	protein_coding	6	43737921	43754224	+	vascular endothelial growth factor A
FAM46A	ENSG00000112773	1.00283	5.16937	2.87544e-21	3.64424e-19	protein_coding	6	82201156	82462491	-	terminal nucleotidyltransferase 5A
CNOT6	ENSG00000113300	0.256812	6.21371	0.0018073	0.0307198	protein_coding	5	179921412	180005405	+	CCR4-NOT transcription complex subunit 6
ARRDC3	ENSG00000113369	0.464873	4.59234	0.000326341	0.00855713	protein_coding	5	90664541	90679176	-	arrestin domain containing 3
LNPEP	ENSG00000113441	0.524066	6.47708	4.95336e-09	3.80671e-07	protein_coding	5	96271098	96373219	+	leucyl and cystinyl aminopeptidase
PDE4D	ENSG00000113448	0.377249	5.02723	0.00030388	0.00804114	protein_coding	5	58264865	59817947	-	phosphodiesterase 4D
TRIM23	ENSG00000113595	0.387713	4.03311	0.000334668	0.00868095	protein_coding	5	64885507	64921802	-	tripartite motif containing 23
TRAPPC13	ENSG00000113597	0.367475	4.59186	0.000213156	0.00617169	protein_coding	5	64920543	64962060	+	trafficking protein particle complex 13
STC2	ENSG00000113739	0.331504	7.70509	0.000719004	0.015631	protein_coding	5	172741716	172756506	-	stanniocalcin 2
DBN1	ENSG00000113758	-0.345419	8.48492	3.11127e-05	0.00124449	protein_coding	5	176883609	176901402	-	drebrin 1
UNC5A	ENSG00000113763	-0.738191	1.40282	0.00334199	0.0467425	protein_coding	5	176237478	176307897	+	unc-5 netrin receptor A
XRN1	ENSG00000114127	0.396981	6.1473	1.10827e-05	0.000523279	protein_coding	3	142025449	142166904	-	5'-3' exoribonuclease 1
RPL24	ENSG00000114391	-0.260591	8.28204	0.00139236	0.0254373	protein_coding	3	101399935	101405626	-	ribosomal protein L24
BBX	ENSG00000114439	0.313782	7.23915	0.000249953	0.00699868	protein_coding	3	107241783	107530171	+	BBX high mobility group box domain containing
GNB4	ENSG00000114450	0.527416	5.17061	5.34054e-07	3.32587e-05	protein_coding	3	179116990	179169378	-	G protein subunit beta 4
PLSCR4	ENSG00000114698	0.415391	3.22912	0.00119465	0.0226513	protein_coding	3	145910126	145968966	-	phospholipid scramblase 4
TNNC1	ENSG00000114854	-0.58887	2.32634	0.00035173	0.0090465	protein_coding	3	52485118	52488086	-	troponin C1, slow skeletal and cardiac type
SLC4A3	ENSG00000114923	-0.359129	3.70225	0.00105233	0.0205183	protein_coding	2	220492049	220506702	+	solute carrier family 4 member 3
EEF1B2	ENSG00000114942	-0.381238	7.96174	1.06736e-05	0.000505616	protein_coding	2	207024309	207027652	+	eukaryotic translation elongation factor 1 beta 2
MOB1A	ENSG00000114978	0.244181	7.42856	0.00347273	0.0480134	protein_coding	2	74379655	74406025	-	MOB kinase activator 1A
REEP6	ENSG00000115255	-0.468515	2.77544	0.000389759	0.00989674	protein_coding	19	1491165	1497926	+	receptor accessory protein 6
IFIH1	ENSG00000115267	3.54409	5.66224	2.06256e-193	1.86249e-190	protein_coding	2	163123589	163175213	-	interferon induced with helicase C domain 1
RPS15	ENSG00000115268	-0.258936	8.28054	0.00138885	0.0254324	protein_coding	19	1438358	1440583	+	ribosomal protein S15
STAT1	ENSG00000115415	2.52446	8.77825	3.79052e-160	2.3811e-157	protein_coding	2	191829084	191885686	-	signal transducer and activator of transcription 1
FHL2	ENSG00000115641	-0.253266	5.58854	0.00350997	0.0484356	protein_coding	2	105974169	106054970	-	four and a half LIM domains 2
ATF2	ENSG00000115966	0.262273	6.11268	0.00156867	0.0277067	protein_coding	2	175936978	176033110	-	activating transcription factor 2
TRAK2	ENSG00000115993	-0.400483	6.50286	1.9589e-06	0.000108023	protein_coding	2	202241930	202316302	-	trafficking kinesin protein 2
FBXO6	ENSG00000116663	1.48544	1.85409	3.70246e-15	3.84843e-13	protein_coding	1	11724181	11734411	+	F-box protein 6
C1orf21	ENSG00000116667	-0.331017	4.11319	0.00188581	0.0315715	protein_coding	1	184356192	184598154	+	chromosome 1 open reading frame 21
TROVE2	ENSG00000116747	0.25111	5.99072	0.0027266	0.0407383	protein_coding	1	193028552	193060907	+	Ro60, Y RNA binding protein
CTH	ENSG00000116761	0.549343	3.68831	1.40419e-06	8.11512e-05	protein_coding	1	70876901	70905534	+	cystathionine gamma-lyase
ADPRHL2	ENSG00000116863	0.378105	4.90013	5.30415e-05	0.00194503	protein_coding	1	36554476	36559533	+	ADP-ribosylhydrolase like 2
MFAP2	ENSG00000117122	-0.746157	3.31493	0.000132966	0.00416697	protein_coding	1	17300997	17307330	-	microfibril associated protein 2
GBP3	ENSG00000117226	1.53062	4.23565	7.03871e-45	1.41244e-42	protein_coding	1	89472349	89488577	-	guanylate binding protein 3
GBP1	ENSG00000117228	1.93406	6.02135	2.49735e-57	6.11554e-55	protein_coding	1	89518002	89531043	-	guanylate binding protein 1
TXNIP	ENSG00000117289	0.768472	7.0539	0.000484864	0.011789	protein_coding	1	145438469	145442635	+	NA
BLZF1	ENSG00000117475	0.59071	5.39236	4.28892e-10	3.46181e-08	protein_coding	1	169337208	169365778	+	basic leucine zipper nuclear factor 1
TMED5	ENSG00000117500	0.346733	6.92414	0.000394827	0.0100078	protein_coding	1	93615299	93646285	-	transmembrane p24 trafficking protein 5
RPS25	ENSG00000118181	-0.346474	9.1296	4.99786e-05	0.00186106	protein_coding	11	118886422	118889401	-	ribosomal protein S25
TNNT2	ENSG00000118194	-0.62145	5.08198	1.23549e-07	8.26406e-06	protein_coding	1	201328136	201346890	-	troponin T2, cardiac type
FBXO30	ENSG00000118496	0.330425	4.81028	0.00170351	0.0294054	protein_coding	6	146114638	146135889	-	F-box protein 30
AKAP7	ENSG00000118507	0.437908	2.30615	0.00142834	0.0259255	protein_coding	6	131456806	131604675	+	A-kinase anchoring protein 7
TGIF2	ENSG00000118707	0.408642	5.32326	2.37003e-05	0.00097835	protein_coding	20	35201891	35222353	+	TGFB induced factor homeobox 2
RBM18	ENSG00000119446	0.286605	4.66569	0.00293247	0.0426247	protein_coding	9	124999903	125027118	-	RNA binding motif protein 18
AFTPH	ENSG00000119844	0.362891	5.58267	5.57632e-05	0.00201921	protein_coding	2	64751465	64820139	+	aftiphilin
FAM178A	ENSG00000119906	0.274813	5.91976	0.00312543	0.0445446	protein_coding	10	102672326	102724893	+	SMC5-SMC6 complex localization factor 2
IFIT3	ENSG00000119917	2.91055	7.42606	8.9931e-156	5.19729e-153	protein_coding	10	91087651	91100728	+	interferon induced protein with tetratricopeptide repeats 3
IFIT2	ENSG00000119922	1.75666	5.67516	5.94192e-70	1.65094e-67	protein_coding	10	91061712	91069033	+	interferon induced protein with tetratricopeptide repeats 2
GNA13	ENSG00000120063	0.247663	6.93496	0.003547	0.0486676	protein_coding	17	63006833	63052957	-	G protein subunit alpha 13
CD274	ENSG00000120217	0.778213	4.45064	4.47694e-12	4.09385e-10	protein_coding	9	5450503	5470566	+	CD274 molecule
NUDCD1	ENSG00000120526	0.482408	5.77953	0.000485081	0.011789	protein_coding	8	110253148	110346614	-	NudC domain containing 1
MASTL	ENSG00000120539	0.559918	6.05393	1.02758e-05	0.000488369	protein_coding	10	27443753	27475853	+	microtubule associated serine/threonine kinase like
CCDC77	ENSG00000120647	0.442075	4.16959	0.000901012	0.0184678	protein_coding	12	498439	551811	+	coiled-coil domain containing 77
UFM1	ENSG00000120686	0.300917	5.51364	0.000665839	0.0149612	protein_coding	13	38923986	38937140	+	ubiquitin fold modifier 1
ELF1	ENSG00000120690	0.55993	5.67161	1.14687e-09	9.0054e-08	protein_coding	13	41506056	41635576	-	E74 like ETS transcription factor 1
TRIM25	ENSG00000121060	1.73061	7.79842	5.00954e-72	1.41917e-69	protein_coding	17	54965270	54991399	-	tripartite motif containing 25
TRIM6	ENSG00000121236	0.590665	1.46739	0.000160868	0.00488283	protein_coding	11	5617339	5634188	+	tripartite motif containing 6
ZNF549	ENSG00000121406	0.454448	3.43266	0.00029962	0.00796065	protein_coding	19	58038693	58068910	+	zinc finger protein 549
ZNF211	ENSG00000121417	0.378593	3.44817	0.00150191	0.0268892	protein_coding	19	58141761	58154147	+	zinc finger protein 211
TRMT1L	ENSG00000121486	0.27475	5.03265	0.00282769	0.0418162	protein_coding	1	185087220	185126204	-	tRNA methyltransferase 1 like
LRIF1	ENSG00000121931	0.405701	4.1197	8.71784e-05	0.00292919	protein_coding	1	111489807	111506701	-	ligand dependent nuclear receptor interacting factor 1
POLK	ENSG00000122008	0.325105	4.79021	0.00111323	0.0214739	protein_coding	5	74807581	74896969	+	DNA polymerase kappa
RPL21	ENSG00000122026	-0.31166	7.98923	0.000239437	0.0067566	protein_coding	13	27825446	27830828	+	ribosomal protein L21
LDB3	ENSG00000122367	-0.539801	1.53021	0.000706371	0.0154631	protein_coding	10	88428206	88495825	+	LIM domain binding 3
RPL5	ENSG00000122406	-0.390155	9.45218	1.8105e-06	0.000100608	protein_coding	1	93297582	93307481	+	ribosomal protein L5
ZNF644	ENSG00000122482	0.249153	6.66903	0.00335516	0.0467908	protein_coding	1	91380859	91487829	-	zinc finger protein 644
NT5C3A	ENSG00000122643	0.446411	5.28174	1.463e-06	8.42127e-05	protein_coding	7	33053742	33102409	-	5'-nucleotidase, cytosolic IIIA
ACO1	ENSG00000122729	-0.913496	6.18721	2.98089e-18	3.44543e-16	protein_coding	9	32384618	32454767	+	aconitase 1
RASSF8	ENSG00000123094	0.292623	6.18236	0.000485496	0.011789	protein_coding	12	26111962	26232825	+	Ras association domain family member 8
C19orf43	ENSG00000123144	-0.304668	6.58841	0.000210783	0.00611525	protein_coding	19	12841454	12845589	-	telomerase RNA component interacting RNase
NMI	ENSG00000123609	0.896497	5.36914	8.807e-21	1.10647e-18	protein_coding	2	152126979	152146571	-	N-myc and STAT interactor
DNPEP	ENSG00000123992	0.487771	4.93681	2.40991e-06	0.000128957	protein_coding	2	220238268	220264744	-	aspartyl aminopeptidase
OBSL1	ENSG00000124006	-0.275558	7.17275	0.00176525	0.0301827	protein_coding	2	220415451	220436581	-	obscurin like cytoskeletal adaptor 1
ZNFX1	ENSG00000124201	1.12889	7.2282	2.89476e-34	4.86319e-32	protein_coding	20	47854483	47894963	-	zinc finger NFX1-type containing 1
STX16	ENSG00000124222	0.425387	7.00256	1.38411e-06	8.03117e-05	protein_coding	20	57226328	57254582	+	syntaxin 16
ZNF391	ENSG00000124613	0.516727	3.41391	1.98344e-05	0.000842847	protein_coding	6	27342394	27371683	+	zinc finger protein 391
MT2A	ENSG00000125148	0.487072	6.95728	3.93896e-08	2.78971e-06	protein_coding	16	56642111	56643409	+	metallothionein 2A
C16orf70	ENSG00000125149	0.472717	4.94301	3.6572e-07	2.30739e-05	protein_coding	16	67143861	67182442	+	chromosome 16 open reading frame 70
IRF1	ENSG00000125347	0.586395	4.76591	0.000199379	0.00586047	protein_coding	5	131817301	131826490	-	interferon regulatory factor 1
PPDPF	ENSG00000125534	-0.278169	6.66867	0.000908876	0.0185998	protein_coding	20	62152077	62153559	+	pancreatic progenitor cell differentiation and proliferation factor
PSD4	ENSG00000125637	-0.541158	1.36019	0.00227442	0.0361404	protein_coding	2	113914902	113966973	+	pleckstrin and Sec7 domain containing 4
RPL23	ENSG00000125691	-0.499133	9.1763	2.40386e-09	1.86726e-07	protein_coding	17	37004118	37010096	-	ribosomal protein L23
SNRPD2	ENSG00000125743	-0.278917	6.63243	0.00156633	0.0276993	protein_coding	19	46190712	46195827	-	small nuclear ribonucleoprotein D2 polypeptide
RBCK1	ENSG00000125826	0.504779	6.97686	1.18341e-08	8.67913e-07	protein_coding	20	388142	411610	+	RANBP2-type and C3HC4-type zinc finger containing 1
AP5S1	ENSG00000125843	-0.316584	4.5982	0.00123932	0.0232542	protein_coding	20	3801178	3805949	+	adaptor related protein complex 5 subunit sigma 1
ZNF133	ENSG00000125846	0.386565	3.96183	0.000319175	0.00838444	protein_coding	20	18269121	18297640	+	zinc finger protein 133
MMP24-AS1	ENSG00000126005	-0.428811	4.99695	0.00068688	0.0152379	antisense	20	33804265	33865934	-	MMP24 opposite strand
IFI6	ENSG00000126709	4.8414	8.36553	0	0	protein_coding	1	27992572	27998729	-	interferon alpha inducible protein 6
SIX1	ENSG00000126778	0.375813	5.48573	1.99299e-05	0.000844422	protein_coding	14	61110133	61124977	-	SIX homeobox 1
ZNF780B	ENSG00000128000	0.341293	4.25626	0.00173598	0.0298233	protein_coding	19	40534167	40562116	-	zinc finger protein 780B
ADM2	ENSG00000128165	1.1463	2.51653	1.46369e-12	1.36434e-10	protein_coding	22	50919985	50924869	+	adrenomedullin 2
GNAZ	ENSG00000128266	-0.660206	-0.0236733	0.00310603	0.0444316	protein_coding	22	23412540	23467224	+	G protein subunit alpha z
APOL3	ENSG00000128284	1.54921	1.99764	5.79833e-14	5.73797e-12	protein_coding	22	36536372	36562225	-	apolipoprotein L3
APOL2	ENSG00000128335	0.881403	5.37729	1.17918e-22	1.56301e-20	protein_coding	22	36622256	36636000	-	apolipoprotein L2
CPA4	ENSG00000128510	-0.391614	5.16288	5.81402e-05	0.00207662	protein_coding	7	129932974	129964020	+	carboxypeptidase A4
HOXD13	ENSG00000128714	0.80238	1.11983	1.33378e-05	0.000615661	protein_coding	2	176957619	176960666	+	homeobox D13
CHAC1	ENSG00000128965	1.73167	2.59157	8.4818e-35	1.45887e-32	protein_coding	15	41245160	41248710	+	ChaC glutathione specific gamma-glutamylcyclotransferase 1
THAP10	ENSG00000129028	0.581598	1.99164	0.000142052	0.00439479	protein_coding	15	71173681	71185124	-	THAP domain containing 10
LOXL1	ENSG00000129038	-0.517453	6.76156	1.79731e-05	0.000777472	protein_coding	15	74218330	74244478	+	lysyl oxidase like 1
KIF1C	ENSG00000129250	-0.58726	8.08091	6.42587e-09	4.86078e-07	protein_coding	17	4901243	4931696	+	kinesin family member 1C
CCNT1	ENSG00000129315	0.307308	6.29855	0.00032871	0.00857257	protein_coding	12	49082247	49110681	-	cyclin T1
BCL2L2	ENSG00000129473	0.302035	5.05584	0.00135729	0.0249814	protein_coding	14	23767999	23780968	+	BCL2 like 2
SNX6	ENSG00000129515	0.260755	6.42937	0.0014522	0.026194	protein_coding	14	35030300	35099389	-	sorting nexin 6
LPPR3	ENSG00000129951	-0.82388	0.822113	0.000958302	0.0192835	protein_coding	19	812518	821967	-	phospholipid phosphatase related 3
APOE	ENSG00000130203	-0.598843	3.68756	1.44714e-05	0.000649326	protein_coding	19	45409011	45412650	+	apolipoprotein E
LRCH2	ENSG00000130224	0.480643	4.53647	3.88726e-06	0.00019916	protein_coding	X	114345185	114468635	-	leucine rich repeats and calponin homology domain containing 2
BST2	ENSG00000130303	4.91937	4.34095	7.08408e-94	2.32615e-91	protein_coding	19	17513748	17516457	-	bone marrow stromal cell antigen 2
KLHDC7B	ENSG00000130487	3.48659	-0.625429	8.45454e-25	1.17453e-22	protein_coding	22	50986462	50989451	+	kelch domain containing 7B
SSBP4	ENSG00000130511	-0.304711	5.42466	0.000654519	0.0147758	protein_coding	19	18529674	18545372	+	single stranded DNA binding protein 4
JUND	ENSG00000130522	-0.361491	6.09578	7.89355e-05	0.00268976	protein_coding	19	18390563	18392432	-	JunD proto-oncogene, AP-1 transcription factor subunit
HELZ2	ENSG00000130589	3.53961	8.18203	2.16653e-168	1.5651e-165	protein_coding	20	62189439	62205592	-	helicase with zinc finger 2
SESN2	ENSG00000130766	0.549575	4.33758	1.44675e-05	0.000649326	protein_coding	1	28586038	28609002	+	sestrin 2
THEMIS2	ENSG00000130775	1.6361	3.27393	9.22878e-32	1.48153e-29	protein_coding	1	28199055	28213196	+	thymocyte selection associated family member 2
C19orf66	ENSG00000130813	1.84761	4.66032	5.14578e-45	1.04713e-42	protein_coding	19	10196798	10203928	+	shiftless antiviral inhibitor of ribosomal frameshifting
ZNF426	ENSG00000130818	0.398378	3.31273	0.000991863	0.0195771	protein_coding	19	9638667	9649303	-	zinc finger protein 426
SLC7A10	ENSG00000130876	-0.412639	2.53354	0.00293251	0.0426247	protein_coding	19	33699570	33716756	-	solute carrier family 7 member 10
LATS1	ENSG00000131023	0.260413	5.87117	0.0024875	0.0383968	protein_coding	6	149979289	150039392	-	large tumor suppressor kinase 1
C1QL1	ENSG00000131094	-0.381558	5.27637	8.01571e-05	0.00271996	protein_coding	17	43037061	43045439	-	complement C1q like 1
COX4I1	ENSG00000131143	-0.268414	7.30859	0.00101673	0.019986	protein_coding	16	85832239	85840650	+	cytochrome c oxidase subunit 4I1
PRR7	ENSG00000131188	-0.429063	3.23841	0.000374964	0.00955465	protein_coding	5	176873446	176883283	+	proline rich 7, synaptic
RLIM	ENSG00000131263	0.280972	6.78852	0.00143884	0.0260506	protein_coding	X	73805052	73834452	-	ring finger protein, LIM domain interacting
ZFYVE20	ENSG00000131381	0.321722	5.41114	0.000397119	0.0100483	protein_coding	3	15111580	15140670	-	rabenosyn, RAB effector
RPL27	ENSG00000131469	-0.454668	8.62851	5.39615e-08	3.76636e-06	protein_coding	17	41150290	41154976	+	ribosomal protein L27
NDUFA2	ENSG00000131495	-0.34865	3.50581	0.00179031	0.0305389	protein_coding	5	140018325	140027370	-	NADH:ubiquinone oxidoreductase subunit A2
PRKAB2	ENSG00000131791	0.295287	6.48155	0.000687645	0.0152379	protein_coding	1	146626685	146644129	-	protein kinase AMP-activated non-catalytic subunit beta 2
ZNF304	ENSG00000131845	0.396985	3.82743	0.000429131	0.0107275	protein_coding	19	57862675	57871266	+	zinc finger protein 304
CHSY1	ENSG00000131873	0.257026	6.89667	0.00194401	0.0321363	protein_coding	15	101715928	101792137	-	chondroitin sulfate synthase 1
GCH1	ENSG00000131979	0.426789	3.70634	9.4683e-05	0.00314478	protein_coding	14	55308726	55369570	-	GTP cyclohydrolase 1
FBXW9	ENSG00000132004	-0.352657	3.27762	0.0033744	0.0469591	protein_coding	19	12798867	12807457	-	F-box and WD repeat domain containing 9
TRIM21	ENSG00000132109	1.66672	4.40322	5.22346e-34	8.67455e-32	protein_coding	11	4406127	4414926	-	tripartite motif containing 21
TRIM5	ENSG00000132256	1.24552	4.48754	3.28931e-31	5.05574e-29	protein_coding	11	5684425	5959849	-	tripartite motif containing 5
TRIM22	ENSG00000132274	5.32824	4.47685	5.81182e-110	2.33248e-107	protein_coding	11	5710919	5758319	+	tripartite motif containing 22
EFR3A	ENSG00000132294	0.2544	6.65373	0.00258449	0.0391413	protein_coding	8	132916335	133025889	+	EFR3 homolog A
XAF1	ENSG00000132530	4.99349	7.61869	5.04261e-100	1.77697e-97	protein_coding	17	6658766	6678966	+	XIAP associated factor 1
ACY3	ENSG00000132744	1.28042	-0.119346	1.54997e-06	8.81655e-05	protein_coding	11	67410026	67418130	-	aminoacylase 3
MYBPH	ENSG00000133055	-1.07844	0.168657	0.000470981	0.0115727	protein_coding	1	203136939	203144941	-	myosin binding protein H
DSTYK	ENSG00000133059	0.342	5.07163	0.000259819	0.00712307	protein_coding	1	205111632	205180727	-	dual serine/threonine and tyrosine protein kinase
EPSTI1	ENSG00000133106	2.67552	5.57823	3.93249e-108	1.53559e-105	protein_coding	13	43460524	43566407	-	epithelial stromal interaction 1
ZNF414	ENSG00000133250	-0.394682	3.54777	0.00105109	0.0205183	protein_coding	19	8575462	8579048	-	zinc finger protein 414
CNDP2	ENSG00000133313	0.370225	6.63705	6.99092e-05	0.00242218	protein_coding	18	72163051	72188366	+	carnosine dipeptidase 2
PDZD2	ENSG00000133401	1.91053	4.30108	4.03538e-72	1.16606e-69	protein_coding	5	31639517	32111037	+	PDZ domain containing 2
LRRCC1	ENSG00000133739	0.408331	2.73581	0.00161706	0.0282506	protein_coding	8	86019382	86058311	+	leucine rich repeat and coiled-coil centrosomal protein 1
RRAS2	ENSG00000133818	0.310006	6.51439	0.000175409	0.00524703	protein_coding	11	14299472	14386052	-	RAS related 2
C14orf159	ENSG00000133943	0.448009	4.34424	0.00120566	0.0228301	protein_coding	14	91526677	91691976	+	D-glutamate cyclase
RSAD2	ENSG00000134321	5.48663	2.75618	2.49557e-128	1.24331e-125	protein_coding	2	7005937	7038370	+	radical S-adenosyl methionine domain containing 2
CMPK2	ENSG00000134326	5.06785	3.1371	1.93642e-139	1.0362e-136	protein_coding	2	6980701	7006766	-	cytidine/uridine monophosphate kinase 2
FST	ENSG00000134363	0.701525	2.08917	0.000493979	0.0119525	protein_coding	5	52776239	52782964	+	follistatin
IL15RA	ENSG00000134470	1.14715	2.86308	1.14325e-16	1.23266e-14	protein_coding	10	5990855	6020150	-	interleukin 15 receptor subunit alpha
FAM127A	ENSG00000134590	-0.366509	5.88556	0.000281529	0.00758867	protein_coding	X	134166333	134167576	+	retrotransposon Gag like 8C
RNF138	ENSG00000134758	0.415661	5.57794	0.000412664	0.0104234	protein_coding	18	29671818	29711524	+	ring finger protein 138
ANXA1	ENSG00000135046	0.258401	8.44193	0.00256652	0.0389917	protein_coding	9	75766673	75785309	+	annexin A1
OASL	ENSG00000135114	1.93342	4.1066	2.21096e-41	4.09538e-39	protein_coding	12	121458095	121477045	-	2'-5'-oligoadenylate synthetase like
HRK	ENSG00000135116	0.919309	0.713521	9.79474e-05	0.00322639	protein_coding	12	117293949	117319246	-	harakiri, BCL2 interacting protein
TRAFD1	ENSG00000135148	0.309117	5.14731	0.000783189	0.0167142	protein_coding	12	112563305	112591407	+	TRAF-type zinc finger domain containing 1
NT5E	ENSG00000135318	1.24886	5.55508	2.5287e-29	3.84576e-27	protein_coding	6	86159809	86205500	+	5'-nucleotidase ecto
ORC3	ENSG00000135336	0.322019	5.83628	0.00289633	0.0423867	protein_coding	6	88299839	88377169	+	origin recognition complex subunit 3
PRRG4	ENSG00000135378	0.545272	1.81531	0.00058997	0.013704	protein_coding	11	32851489	32879669	+	proline rich and Gla domain 4
CD63	ENSG00000135404	-0.315081	7.09156	0.000540451	0.0128318	protein_coding	12	56119107	56123491	-	CD63 molecule
GDF11	ENSG00000135414	-0.348317	4.54283	0.000641759	0.0145788	protein_coding	12	56137064	56150911	+	growth differentiation factor 11
HNRNPA1	ENSG00000135486	-0.250165	10.1463	0.00286396	0.0420513	protein_coding	12	54673977	54680872	+	heterogeneous nuclear ribonucleoprotein A1
KCNMB4	ENSG00000135643	-0.569208	2.37715	0.00316678	0.0449447	protein_coding	12	70760056	70828072	+	potassium calcium-activated channel subfamily M regulatory beta subunit 4
USP15	ENSG00000135655	0.315075	5.78737	0.000552136	0.0129995	protein_coding	12	62654119	62811211	+	ubiquitin specific peptidase 15
RNASEL	ENSG00000135828	0.651193	2.3919	2.09781e-05	0.000883648	protein_coding	1	182542769	182558391	-	ribonuclease L
SP110	ENSG00000135899	2.59036	6.37035	1.85698e-156	1.1179e-153	protein_coding	2	231032009	231090444	-	SP110 nuclear body protein
ITM2C	ENSG00000135916	-0.40064	8.50009	0.00275012	0.0409627	protein_coding	2	231729354	231743963	+	integral membrane protein 2C
ALDH1L2	ENSG00000136010	0.874207	4.36726	8.39368e-14	8.19404e-12	protein_coding	12	105413568	105478355	-	aldehyde dehydrogenase 1 family member L2
KIAA1033	ENSG00000136051	0.296139	7.29282	0.000273071	0.00744402	protein_coding	12	105501102	105562912	+	WASH complex subunit 4
PHF11	ENSG00000136147	1.13142	4.90837	1.48637e-18	1.74594e-16	protein_coding	13	50069746	50103123	+	PHD finger protein 11
RPL13AP25	ENSG00000136149	-0.870253	0.827712	1.14137e-05	0.000534983	pseudogene	13	55014839	55015450	-
SETDB2	ENSG00000136169	0.364083	4.14151	0.0015574	0.027609	protein_coding	13	50018429	50069138	+	SET domain bifurcated histone lysine methyltransferase 2
CHST12	ENSG00000136213	-0.29835	4.78508	0.00226847	0.0360957	protein_coding	7	2443223	2474242	+	carbohydrate sulfotransferase 12
TTYH3	ENSG00000136295	-0.434816	8.40539	0.00057627	0.0134724	protein_coding	7	2671585	2704436	+	tweety family member 3
CALCOCO2	ENSG00000136436	0.351567	6.41776	0.00014205	0.00439479	protein_coding	17	46908350	46943884	+	calcium binding and coiled-coil domain 2
RPS6KC1	ENSG00000136643	0.310434	5.50203	0.000518549	0.0124245	protein_coding	1	213224589	213448116	+	ribosomal protein S6 kinase C1
NIPSNAP3A	ENSG00000136783	0.381764	4.06121	0.000991657	0.0195771	protein_coding	9	107509969	107522403	+	nipsnap homolog 3A
STX17	ENSG00000136874	0.386824	3.81113	0.000667964	0.0149856	protein_coding	9	102668915	102732618	+	syntaxin 17
RPL35	ENSG00000136942	-0.267231	8.51929	0.00211518	0.0342022	protein_coding	9	127620159	127624260	-	ribosomal protein L35
PLAA	ENSG00000137055	0.30908	5.85995	0.000965292	0.0193547	protein_coding	9	26904081	26947461	-	phospholipase A2 activating protein
DCTN3	ENSG00000137100	-0.293066	4.7336	0.00285093	0.041988	protein_coding	9	34613548	34620515	-	dynactin subunit 3
IGFBPL1	ENSG00000137142	-0.500566	3.30702	0.00166739	0.0288855	protein_coding	9	38408991	38424444	-	insulin like growth factor binding protein like 1
RPS6	ENSG00000137154	-0.444065	9.95087	8.31095e-08	5.69083e-06	protein_coding	9	19375713	19380252	-	ribosomal protein S6
GMPR	ENSG00000137198	1.28563	4.56365	1.49723e-10	1.24322e-08	protein_coding	6	16238811	16295780	+	guanosine monophosphate reductase
CMTR1	ENSG00000137200	0.545697	7.21524	3.93721e-11	3.386e-09	protein_coding	6	37400995	37450603	+	cap methyltransferase 1
TLR2	ENSG00000137462	0.620549	0.502769	0.00276581	0.0411539	protein_coding	4	154622652	154626851	+	toll like receptor 2
DDX60	ENSG00000137628	2.83538	5.63983	2.90673e-165	1.90893e-162	protein_coding	4	169137444	169239958	-	DExD/H-box helicase 60
MMP13	ENSG00000137745	1.7629	0.544614	8.37378e-12	7.60908e-10	protein_coding	11	102813724	102826463	-	matrix metallopeptidase 13
RPLP1	ENSG00000137818	-0.280602	10.2309	0.000609596	0.0140694	protein_coding	15	69745123	69748255	+	ribosomal protein lateral stalk subunit P1
TMEM62	ENSG00000137842	0.702077	3.15101	8.97578e-08	6.11708e-06	protein_coding	15	43415477	43477344	+	transmembrane protein 62
IFI44L	ENSG00000137959	6.37149	6.77094	1.24744e-73	3.67817e-71	protein_coding	1	79085607	79111830	+	interferon induced protein 44 like
IFI44	ENSG00000137965	3.45234	6.40699	3.92761e-276	8.10659e-273	protein_coding	1	79115481	79129763	+	interferon induced protein 44
RPL7P9	ENSG00000137970	-0.572959	1.29414	0.000494711	0.0119525	pseudogene	1	97144430	97145176	-
DBT	ENSG00000137992	0.39492	4.8782	9.15956e-05	0.00306336	protein_coding	1	100652475	100715390	-	dihydrolipoamide branched chain transacylase E2
PPM1B	ENSG00000138032	0.25532	6.55645	0.00194173	0.0321353	protein_coding	2	44395108	44471523	+	protein phosphatase, Mg2+/Mn2+ dependent 1B
PNPT1	ENSG00000138035	1.42345	7.05727	4.35062e-48	9.5239e-46	protein_coding	2	55861400	55921045	-	polyribonucleotide nucleotidyltransferase 1
PARP9	ENSG00000138496	3.40065	6.257	2.33437e-210	2.24846e-207	protein_coding	3	122246771	122283424	-	poly(ADP-ribose) polymerase family member 9
SECISBP2L	ENSG00000138593	0.266271	6.99416	0.00213773	0.0344709	protein_coding	15	49280673	49338760	-	SECIS binding protein 2 like
HERC6	ENSG00000138642	3.13637	6.24075	3.46117e-242	5.55632e-239	protein_coding	4	89299891	89364263	+	HECT and RLD domain containing E3 ubiquitin protein ligase family member 6
HERC5	ENSG00000138646	2.24363	6.64496	6.676e-126	3.11145e-123	protein_coding	4	89378268	89427314	+	HECT and RLD domain containing E3 ubiquitin protein ligase 5
SCARB2	ENSG00000138760	0.316	7.50434	0.00312626	0.0445446	protein_coding	4	77079890	77135046	-	scavenger receptor class B member 2
CNOT6L	ENSG00000138767	0.375302	5.54583	3.47962e-05	0.00135915	protein_coding	4	78634541	78740769	-	CCR4-NOT transcription complex subunit 6 like
KIF21A	ENSG00000139116	0.328988	5.59366	0.00127499	0.0238305	protein_coding	12	39687030	39837192	-	kinesin family member 21A
FAM60A	ENSG00000139146	0.353568	6.6186	2.73998e-05	0.00111513	protein_coding	12	31433518	31479992	-	SIN3-HDAC complex associated factor
TAPBPL	ENSG00000139192	0.581276	3.57349	5.47613e-05	0.00198792	protein_coding	12	6560856	6575683	+	TAP binding protein like
RPL14P1	ENSG00000139239	-0.724888	2.13787	2.33093e-06	0.000126289	pseudogene	12	63359095	63359764	+
INHBE	ENSG00000139269	2.14681	0.50371	3.44263e-19	4.11068e-17	protein_coding	12	57846106	57853063	+	inhibin subunit beta E
LNX2	ENSG00000139517	0.395076	4.57176	5.0484e-05	0.00187024	protein_coding	13	28120050	28194541	-	ligand of numb-protein X 2
MBNL2	ENSG00000139793	0.340964	6.53846	3.31492e-05	0.00130501	protein_coding	13	97873688	98046374	+	muscleblind like splicing regulator 2
C14orf37	ENSG00000139971	-0.515862	2.66578	0.00127833	0.0238314	protein_coding	14	58466453	58764857	-	armadillo like helical domain containing 4
NAA30	ENSG00000139977	0.276996	5.95022	0.0012769	0.0238314	protein_coding	14	57857262	57882635	+	N(alpha)-acetyltransferase 30, NatC catalytic subunit
WARS	ENSG00000140105	0.823687	8.44065	4.50938e-20	5.52132e-18	protein_coding	14	100800125	100843142	-	tryptophanyl-tRNA synthetase 1
LYSMD2	ENSG00000140280	0.404339	4.10207	0.000551707	0.0129995	protein_coding	15	52015208	52043782	-	LysM domain containing 2
PML	ENSG00000140464	1.16453	7.44393	4.03036e-25	5.65346e-23	protein_coding	15	74287014	74340153	+	promyelocytic leukemia
MFGE8	ENSG00000140545	-0.371708	6.55759	0.00315088	0.044807	protein_coding	15	89441916	89456642	-	milk fat globule-EGF factor 8 protein
ARMC5	ENSG00000140691	-0.340112	3.48671	0.00320986	0.0453334	protein_coding	16	31469401	31478487	+	armadillo repeat containing 5
CPNE2	ENSG00000140848	-0.293553	4.84565	0.00280668	0.0416334	protein_coding	16	57126449	57181878	+	copine 2
NLRC5	ENSG00000140853	1.42376	5.37785	3.34788e-35	5.89881e-33	protein_coding	16	57023397	57117443	+	NLR family CARD domain containing 5
RPS2	ENSG00000140988	-0.282316	10.5075	0.00108392	0.0210706	protein_coding	16	2012053	2014861	-	ribosomal protein S2
NDUFB10	ENSG00000140990	-0.300326	6.15031	0.000329678	0.00857509	protein_coding	16	2009509	2011976	+	NADH:ubiquinone oxidoreductase subunit B10
GID4	ENSG00000141034	0.333472	5.19953	0.000275559	0.00748959	protein_coding	17	17942606	17971718	+	GID complex subunit 4 homolog
ESCO1	ENSG00000141446	0.302033	6.24239	0.0002764	0.00748959	protein_coding	18	19109242	19180845	-	establishment of sister chromatid cohesion N-acetyltransferase 1
GATA6	ENSG00000141448	0.512604	3.04592	5.18826e-05	0.00191224	protein_coding	18	19749404	19782491	+	GATA binding protein 6
RAB40B	ENSG00000141542	-0.476188	3.42132	0.000357277	0.00915237	protein_coding	17	80612849	80656604	-	RAB40B, member RAS oncogene family
SECTM1	ENSG00000141574	0.709175	3.89362	8.68795e-09	6.4371e-07	protein_coding	17	80278900	80291950	-	secreted and transmembrane 1
TNFRSF11A	ENSG00000141655	0.81623	0.368432	0.000103078	0.00335421	protein_coding	18	59992520	60058516	+	TNF receptor superfamily member 11a
ZCCHC2	ENSG00000141664	0.917269	5.34159	1.0284e-22	1.37578e-20	protein_coding	18	60190240	60254942	+	zinc finger CCHC-type containing 2
PMAIP1	ENSG00000141682	0.565506	4.71803	7.11298e-09	5.32478e-07	protein_coding	18	57567180	57571538	+	phorbol-12-myristate-13-acetate-induced protein 1
LEPREL4	ENSG00000141696	-0.317546	5.57872	0.00290441	0.0423867	protein_coding	17	39958199	39968856	-	prolyl 3-hydroxylase family member 4 (inactive)
ZFP14	ENSG00000142065	0.686825	2.43044	1.33802e-05	0.000615661	protein_coding	19	36827162	36870101	-	ZFP14 zinc finger protein
IFITM3	ENSG00000142089	2.24262	8.8313	4.80206e-83	1.44542e-80	protein_coding	11	319669	327537	-	interferon induced transmembrane protein 3
LMTK3	ENSG00000142235	-0.779821	0.824992	0.00163395	0.02846	protein_coding	19	48988528	49016446	-	lemur tyrosine kinase 3
ERVK3-1	ENSG00000142396	0.337073	3.99895	0.00234006	0.0367491	processed_transcript	19	58816715	58827023	+
RPS11	ENSG00000142534	-0.302773	9.33839	0.000650055	0.014721	protein_coding	19	49999622	50002946	+	ribosomal protein S11
RPL13A	ENSG00000142541	-0.412235	9.93526	1.01907e-06	6.03426e-05	protein_coding	19	49990811	49995565	+	ribosomal protein L13a
IL22RA1	ENSG00000142677	1.34288	0.146831	2.29761e-09	1.79437e-07	protein_coding	1	24446261	24469611	-	interleukin 22 receptor subunit alpha 1
TINAGL1	ENSG00000142910	-0.290816	6.45371	0.00251186	0.0384851	protein_coding	1	32042116	32053288	+	tubulointerstitial nephritis antigen like 1
RPS8	ENSG00000142937	-0.294638	8.95568	0.000520318	0.0124463	protein_coding	1	45240923	45244451	+	ribosomal protein S8
PTPRF	ENSG00000142949	-0.258568	8.21763	0.00157802	0.02777	protein_coding	1	43990858	44089343	+	protein tyrosine phosphatase receptor type F
MOB3C	ENSG00000142961	0.564688	3.00044	0.000300982	0.00797905	protein_coding	1	47073387	47082563	-	MOB kinase activator 3C
MTF2	ENSG00000143033	0.335649	5.26766	0.000255293	0.00706605	protein_coding	1	93544792	93604638	+	metal response element binding transcription factor 2
CTTNBP2NL	ENSG00000143079	0.286424	5.89368	0.000844625	0.0175838	protein_coding	1	112938803	113006078	+	CTTNBP2 N-terminal like
CRABP2	ENSG00000143320	-0.423059	3.99808	0.00193702	0.0320941	protein_coding	1	156669398	156675608	-	cellular retinoic acid binding protein 2
RGS16	ENSG00000143333	0.655931	0.249931	0.0027487	0.0409627	protein_coding	1	182567758	182573543	-	regulator of G protein signaling 16
SNX27	ENSG00000143376	0.346885	7.00316	1.70977e-05	0.00074406	protein_coding	1	151584541	151671567	+	sorting nexin 27
SEMA6C	ENSG00000143434	-0.655665	3.54231	5.02402e-05	0.00186599	protein_coding	1	151104161	151119104	-	semaphorin 6C
GOLPH3L	ENSG00000143457	0.261464	6.59332	0.0018583	0.0311832	protein_coding	1	150618701	150669630	-	golgi phosphoprotein 3 like
RAB13	ENSG00000143545	-0.512253	7.0151	7.73467e-09	5.76034e-07	protein_coding	1	153954127	153958834	-	RAB13, member RAS oncogene family
SDE2	ENSG00000143751	0.302113	4.68751	0.00254391	0.0387705	protein_coding	1	226170403	226187032	-	SDE2 telomere maintenance homolog
WNT9A	ENSG00000143816	-0.558188	2.76108	0.000315887	0.00831319	protein_coding	1	228106357	228135599	-	Wnt family member 9A
RPS27A	ENSG00000143947	-0.277386	8.96042	0.000584635	0.0136019	protein_coding	2	55459039	55462989	+	ribosomal protein S27a
SUMF1	ENSG00000144455	-0.304727	5.00842	0.00364479	0.049539	protein_coding	3	3742498	4508965	-	sulfatase modifying factor 1
HES6	ENSG00000144485	-0.359463	3.13779	0.00250789	0.0384851	protein_coding	2	239146908	239149303	-	hes family bHLH transcription factor 6
STK11IP	ENSG00000144589	-0.274871	5.5653	0.00257973	0.0391101	protein_coding	2	220462582	220481173	+	serine/threonine kinase 11 interacting protein
EAF1	ENSG00000144597	0.308504	4.3621	0.00246604	0.0381978	protein_coding	3	15468862	15484120	+	ELL associated factor 1
RPL32	ENSG00000144713	-0.322395	9.0114	9.66898e-05	0.00320407	protein_coding	3	12875984	12883087	-	ribosomal protein L32
RPS3A	ENSG00000145425	-0.372804	7.99509	7.67464e-06	0.000375875	protein_coding	4	152020725	152025804	+	ribosomal protein S3A
NDUFS6	ENSG00000145494	-0.312513	6.58352	0.000737916	0.0159126	protein_coding	5	1801514	1816719	+	NADH:ubiquinone oxidoreductase subunit S6
RPL37	ENSG00000145592	-0.370824	9.36638	4.87545e-06	0.00024716	protein_coding	5	40825364	40835437	-	ribosomal protein L37
CXCL14	ENSG00000145824	-1.192	0.0598334	1.66761e-07	1.08043e-05	protein_coding	5	134906373	134914969	-	C-X-C motif chemokine ligand 14
LRRTM2	ENSG00000146006	0.61743	1.4884	0.000686403	0.0152379	protein_coding	5	138204612	138211057	-	leucine rich repeat transmembrane neuronal 2
RNF217	ENSG00000146373	0.311632	5.43954	0.000875965	0.0180861	protein_coding	6	125283691	125413779	+	ring finger protein 217
RBAK	ENSG00000146587	0.295902	5.70229	0.000712292	0.0155429	protein_coding	7	5085452	5109119	+	RB associated KRAB zinc finger
AC004453.8	ENSG00000146677	-0.488866	1.69738	0.00270525	0.0405031	pseudogene	7	44507441	44507939	+
ATXN7L1	ENSG00000146776	0.381289	3.55486	0.00283958	0.0419322	protein_coding	7	105245514	105517050	-	ataxin 7 like 1
TMEM140	ENSG00000146859	0.578068	1.17148	0.000596278	0.0138061	protein_coding	7	134832824	134850967	+	transmembrane protein 140
TLK2	ENSG00000146872	0.26319	6.15056	0.00299046	0.0430769	protein_coding	17	60536019	60692842	+	tousled like kinase 2
SLC16A2	ENSG00000147100	-0.691902	2.33686	8.47539e-05	0.00286104	protein_coding	X	73641085	73753752	+	solute carrier family 16 member 2
RPL10	ENSG00000147403	-0.294834	9.36977	0.000350548	0.00904415	protein_coding	X	153618315	153637504	+	ribosomal protein L10
RPL7	ENSG00000147604	-0.436325	8.81865	1.9146e-07	1.22943e-05	protein_coding	8	74202506	74208024	-	ribosomal protein L7
NDUFB9	ENSG00000147684	-0.321079	6.27539	0.000546402	0.0129205	protein_coding	8	125551344	125580751	+	NADH:ubiquinone oxidoreductase subunit B9
SLC39A4	ENSG00000147804	-0.506808	2.06464	0.000876265	0.0180861	protein_coding	8	145635126	145642279	-	solute carrier family 39 member 4
RPL7A	ENSG00000148303	-0.353197	9.35917	2.1313e-05	0.000889973	protein_coding	9	136215069	136218281	+	ribosomal protein L7a
FAM171A1	ENSG00000148468	-0.295846	5.97193	0.000785178	0.0167319	protein_coding	10	15253642	15413061	-	family with sequence similarity 171 member A1
PAMR1	ENSG00000149090	-0.695475	2.43634	0.00203206	0.0332494	protein_coding	11	35453370	35551848	-	peptidase domain containing associated with muscle regeneration 1
SERPING1	ENSG00000149131	1.58979	2.9215	4.41014e-17	4.86394e-15	protein_coding	11	57364860	57382326	+	serpin family G member 1
CCDC82	ENSG00000149231	0.25823	5.52151	0.00336878	0.0469355	protein_coding	11	96085933	96123087	-	coiled-coil domain containing 82
RPS3	ENSG00000149273	-0.420937	9.5489	5.43456e-07	3.36989e-05	protein_coding	11	75110530	75133324	+	ribosomal protein S3
ADAM33	ENSG00000149451	-0.289068	6.31157	0.000936955	0.0190128	protein_coding	20	3648612	3662893	-	ADAM metallopeptidase domain 33
VPS51	ENSG00000149823	-0.311349	5.95762	0.00230348	0.0364121	protein_coding	11	64856796	64879332	+	VPS51 subunit of GARP complex
SLC7A11	ENSG00000151012	0.748421	5.83644	4.52746e-10	3.63404e-08	protein_coding	4	139085251	139163503	-	solute carrier family 7 member 11
IPMK	ENSG00000151151	0.359631	4.39861	0.000449962	0.0111129	protein_coding	10	59951278	60027694	-	inositol polyphosphate multikinase
ME3	ENSG00000151376	0.901815	0.495219	5.12261e-05	0.00189288	protein_coding	11	86152150	86383678	-	malic enzyme 3
NEK7	ENSG00000151414	0.29838	6.59082	0.00250684	0.0384851	protein_coding	1	198126093	198291550	+	NIMA related kinase 7
SCLT1	ENSG00000151466	0.377793	4.44114	0.000571717	0.0134094	protein_coding	4	129786076	130014764	-	sodium channel and clathrin linker 1
C4orf33	ENSG00000151470	0.833828	3.04254	4.97305e-11	4.20179e-09	protein_coding	4	130014472	130037795	+	chromosome 4 open reading frame 33
RNF144A	ENSG00000151692	0.502713	1.9671	0.00149306	0.026764	protein_coding	2	7057523	7208417	+	ring finger protein 144A
CACUL1	ENSG00000151893	0.318569	6.78019	0.000127481	0.00403913	protein_coding	10	120433679	120514761	-	CDK2 associated cullin domain 1
RNF219	ENSG00000152193	0.411438	3.33359	0.00262251	0.03948	protein_coding	13	79188426	79233314	-	ORC ubiquitin ligase 1
UHMK1	ENSG00000152332	0.425468	7.32541	3.3681e-06	0.000175676	protein_coding	1	162467041	162499419	+	U2AF homology motif kinase 1
ZNF547	ENSG00000152433	1.02025	0.177878	2.77255e-05	0.00112522	protein_coding	19	57874845	57890933	+	zinc finger protein 547
ZNF837	ENSG00000152475	-0.609851	1.14851	0.000500502	0.0120521	protein_coding	19	58878985	58892427	-	zinc finger protein 837
NADK2	ENSG00000152620	0.263456	5.48641	0.003555	0.0487311	protein_coding	5	36192694	36242381	-	NAD kinase 2, mitochondrial
RASGRP3	ENSG00000152689	1.40719	3.13101	9.83787e-14	9.53943e-12	protein_coding	2	33661391	33789817	+	RAS guanyl releasing protein 3
GPR180	ENSG00000152749	0.559926	4.94366	1.90671e-08	1.38433e-06	protein_coding	13	95254157	95286899	+	G protein-coupled receptor 180
FARP1	ENSG00000152767	-0.246248	6.95852	0.00351728	0.0484703	protein_coding	13	98794816	99102027	+	FERM, ARH/RhoGEF and pleckstrin domain protein 1
IFIT5	ENSG00000152778	2.07385	6.62015	3.64356e-118	1.5483e-115	protein_coding	10	91174343	91180758	+	interferon induced protein with tetratricopeptide repeats 5
SREK1IP1	ENSG00000153006	0.314528	4.99283	0.000828173	0.0172911	protein_coding	5	64013971	64064512	-	SREK1 interacting protein 1
SMARCA5	ENSG00000153147	0.297309	7.91329	0.000689923	0.015265	protein_coding	4	144434616	144478639	+	SWI/SNF related, matrix associated, actin dependent regulator of chromatin, subfamily a, member 5
CEBPG	ENSG00000153879	0.456221	5.43782	1.47583e-06	8.46142e-05	protein_coding	19	33864236	33873592	+	CCAAT enhancer binding protein gamma
C16orf74	ENSG00000154102	-0.57287	1.77139	0.000663093	0.0149227	protein_coding	16	85723690	85784735	-	chromosome 16 open reading frame 74
CCSAP	ENSG00000154429	0.454369	4.71835	4.87418e-06	0.00024716	protein_coding	1	229456758	229479041	-	centriole, cilia and spindle associated protein
C21orf91	ENSG00000154642	0.576479	4.7746	4.03517e-09	3.11766e-07	protein_coding	21	19161284	19191703	-	chromosome 21 open reading frame 91
ADAMTS5	ENSG00000154736	-0.438979	4.23999	0.00193563	0.0320941	protein_coding	21	28290231	28338832	-	ADAM metallopeptidase with thrombospondin type 1 motif 5
TTC39B	ENSG00000155158	0.612288	3.2473	3.09014e-06	0.000162943	protein_coding	9	15163620	15307358	-	tetratricopeptide repeat domain 39B
SLC25A28	ENSG00000155287	0.682012	5.13968	5.98588e-13	5.68973e-11	protein_coding	10	101370282	101380366	-	solute carrier family 25 member 28
USP25	ENSG00000155313	0.278129	6.20743	0.0023764	0.0371582	protein_coding	21	17102344	17252377	+	ubiquitin specific peptidase 25
MOV10	ENSG00000155363	0.605617	6.96487	2.55609e-11	2.25185e-09	protein_coding	1	113215763	113243368	+	Mov10 RISC complex RNA helicase
MIER3	ENSG00000155545	0.300302	5.62566	0.000679809	0.0151677	protein_coding	5	56215429	56267502	-	MIER family member 3
PIK3AP1	ENSG00000155629	1.34175	2.35254	5.64921e-18	6.42675e-16	protein_coding	10	98353069	98480271	-	phosphoinositide-3-kinase adaptor protein 1
FAM126B	ENSG00000155744	0.333127	4.99921	0.000613813	0.0141216	protein_coding	2	201838441	201936394	-	family with sequence similarity 126 member B
WHAMM	ENSG00000156232	0.317422	5.03633	0.000637689	0.014555	protein_coding	15	83478380	83503611	+	WASP homolog associated with actin, golgi membranes and microtubules
ANKRD9	ENSG00000156381	-0.377598	4.0852	0.000625086	0.0143126	protein_coding	14	102973179	102976136	-	ankyrin repeat domain 9
C14orf2	ENSG00000156411	-0.287426	6.35206	0.00246246	0.0381978	protein_coding	14	104378625	104394606	-	ATP synthase membrane subunit 6.8PL
UQCRB	ENSG00000156467	-0.280708	6.34284	0.000572805	0.0134131	protein_coding	8	97238148	97247862	-	ubiquinol-cytochrome c reductase binding protein
FAM122C	ENSG00000156500	0.49295	1.60766	0.00334931	0.0467544	protein_coding	X	133930819	133988640	+	family with sequence similarity 122C
EEF1A1	ENSG00000156508	-0.328953	12.5213	5.84175e-05	0.00207662	protein_coding	6	74225473	74233520	-	eukaryotic translation elongation factor 1 alpha 1
PHF6	ENSG00000156531	0.275962	6.3287	0.0015104	0.0270078	protein_coding	X	133507283	133562820	+	PHD finger protein 6
UBE2L6	ENSG00000156587	2.72153	5.41351	2.78334e-99	9.5747e-97	protein_coding	11	57319129	57335757	-	ubiquitin conjugating enzyme E2 L6
SAMD8	ENSG00000156671	0.317241	5.82648	0.000351892	0.0090465	protein_coding	10	76859344	76941881	+	sterile alpha motif domain containing 8
BAG4	ENSG00000156735	0.291517	5.19456	0.00284133	0.0419322	protein_coding	8	38034051	38070819	+	BCL2 associated athanogene 4
SASS6	ENSG00000156876	0.354002	4.54747	0.00362368	0.0493914	protein_coding	1	100549119	100598511	-	SAS-6 centriolar assembly protein
KIT	ENSG00000157404	-0.410168	2.99108	0.00189211	0.0316036	protein_coding	4	55524085	55606881	+	KIT proto-oncogene, receptor tyrosine kinase
RNF111	ENSG00000157450	0.286045	6.17247	0.00053293	0.0127059	protein_coding	15	59157374	59389618	+	ring finger protein 111
TSPAN18	ENSG00000157570	-0.598828	2.88996	0.000264257	0.00723103	protein_coding	11	44748015	44953972	+	tetraspanin 18
MX1	ENSG00000157601	5.37956	8.62172	0	0	protein_coding	21	42792231	42831141	+	MX dynamin like GTPase 1
CLSTN2	ENSG00000158258	-0.969184	1.51775	7.86312e-06	0.000381229	protein_coding	3	139654027	140296239	+	calsyntenin 2
CUL4B	ENSG00000158290	0.28604	7.35873	0.00049726	0.011994	protein_coding	X	119658464	119709649	-	cullin 4B
NBL1	ENSG00000158747	-0.471881	3.89478	0.0024003	0.0374914	protein_coding	1	19967048	19984945	+	NBL1, DAN family BMP antagonist, MICOS10-NBL1 readthrough
PINK1	ENSG00000158828	-0.388542	4.74028	0.0007037	0.0154515	protein_coding	1	20959948	20978004	+	PTEN induced kinase 1
FBXW5	ENSG00000159069	-0.281445	5.93214	0.0012356	0.0232145	protein_coding	9	139834887	139839148	-	F-box and WD repeat domain containing 5
PTMS	ENSG00000159335	-0.384866	7.89229	0.000804678	0.0169722	protein_coding	12	6874682	6880116	+	parathymosin
C1R	ENSG00000159403	1.21691	2.84195	1.30119e-11	1.16047e-09	protein_coding	12	7187513	7245203	-	complement C1r
GPBP1L1	ENSG00000159592	0.248841	6.74918	0.00342983	0.0475568	protein_coding	1	46092976	46153785	-	GC-rich promoter binding protein 1 like 1
CCDC117	ENSG00000159873	0.32501	5.12842	0.0010745	0.0209223	protein_coding	22	29168662	29185283	+	coiled-coil domain containing 117
CCDC107	ENSG00000159884	-0.697528	1.48557	1.4861e-05	0.000657071	protein_coding	9	35658301	35661508	+	coiled-coil domain containing 107
ZNF222	ENSG00000159885	0.602978	1.2821	0.000228041	0.00649848	protein_coding	19	44529494	44537265	+	zinc finger protein 222
ZNF221	ENSG00000159905	0.762895	0.872279	0.00025046	0.00699932	protein_coding	19	44455375	44471861	+	zinc finger protein 221
SLC2A6	ENSG00000160326	-0.396283	5.7894	0.00044966	0.0111129	protein_coding	9	136336217	136344259	-	solute carrier family 2 member 6
GPSM1	ENSG00000160360	-0.351805	6.8067	0.00181158	0.0307564	protein_coding	9	139221932	139254057	+	G protein signaling modulator 1
TAOK1	ENSG00000160551	0.273119	7.05645	0.0010516	0.0205183	protein_coding	17	27717482	27878922	+	TAO kinase 1
ADAR	ENSG00000160710	1.18873	7.95156	2.19563e-47	4.59747e-45	protein_coding	1	154554538	154600475	-	adenosine deaminase RNA specific
PAQR6	ENSG00000160781	-0.652977	1.24955	0.000568404	0.0133533	protein_coding	1	156213206	156217881	-	progestin and adipoQ receptor family member 6
LY6E	ENSG00000160932	1.61282	7.96814	1.53969e-57	3.83543e-55	protein_coding	8	144099399	144105249	+	lymphocyte antigen 6 family member E
GRIN2C	ENSG00000161509	-0.765635	0.709715	0.000220218	0.00632547	protein_coding	17	72838162	72857627	-	glutamate ionotropic receptor NMDA type subunit 2C
CCL5	ENSG00000161570	1.14876	0.301786	2.03199e-06	0.000111628	protein_coding	17	34198495	34207797	-	NA
FAM171A2	ENSG00000161682	-0.460823	3.74327	0.000811289	0.0170867	protein_coding	17	42430583	42441243	-	family with sequence similarity 171 member A2
DBF4B	ENSG00000161692	0.315458	6.8321	0.0025389	0.0387705	protein_coding	17	42785976	42829632	+	DBF4 zinc finger B
CXCL16	ENSG00000161921	0.591875	3.22953	5.82186e-06	0.000292063	protein_coding	17	4636821	4643217	-	C-X-C motif chemokine ligand 16
FLYWCH2	ENSG00000162076	-0.398819	3.90359	0.000540134	0.0128318	protein_coding	16	2933187	2949383	+	FLYWCH family member 2
RPL29	ENSG00000162244	-0.241455	8.83148	0.00353005	0.0485266	protein_coding	3	52027616	52029958	-	ribosomal protein L29
DCP1A	ENSG00000162290	0.480318	5.69613	5.99457e-08	4.144e-06	protein_coding	3	53317447	53381654	-	NA
RBP7	ENSG00000162444	-0.416787	3.44427	0.00131387	0.0243994	protein_coding	1	10057264	10076078	+	retinol binding protein 7
PDPN	ENSG00000162493	-0.296744	5.32733	0.00298624	0.0430591	protein_coding	1	13909960	13944452	+	podoplanin
C1orf86	ENSG00000162585	-0.375083	4.73422	0.000101437	0.00332326	protein_coding	1	2115903	2144159	-	FA core complex associated protein 20
DNAJB4	ENSG00000162616	0.449245	4.71493	9.99171e-06	0.000476436	protein_coding	1	78444859	78483648	+	DnaJ heat shock protein family (Hsp40) member B4
GBP4	ENSG00000162654	0.97862	4.44176	2.81469e-17	3.15245e-15	protein_coding	1	89646831	89664615	-	guanylate binding protein 4
KCNT2	ENSG00000162687	0.747315	2.48525	0.00169703	0.0293285	protein_coding	1	196194909	196578355	-	potassium sodium-activated channel subfamily T member 2
ZNF281	ENSG00000162702	0.27618	6.24907	0.00227628	0.0361404	protein_coding	1	200374068	200379184	-	zinc finger protein 281
ATF3	ENSG00000162772	0.539626	3.13299	9.34033e-05	0.00310942	protein_coding	1	212738676	212794119	+	activating transcription factor 3
C1orf115	ENSG00000162817	-0.363216	6.21291	5.84305e-05	0.00207662	protein_coding	1	220863187	220872499	+	chromosome 1 open reading frame 115
C2orf44	ENSG00000163026	0.348879	4.21342	0.00230989	0.0364338	protein_coding	2	24252210	24272445	-	WD repeat and coiled coil containing
H3F3A	ENSG00000163041	-0.295694	6.53619	0.000437659	0.0108835	protein_coding	1	226249552	226259702	+	H3.3 histone A
SGPP2	ENSG00000163082	-0.803774	0.317532	0.000149771	0.00460402	protein_coding	2	223289236	223425667	+	sphingosine-1-phosphate phosphatase 2
CTSS	ENSG00000163131	1.15501	1.74561	2.13016e-10	1.74867e-08	protein_coding	1	150702672	150738433	-	cathepsin S
LYSMD1	ENSG00000163155	0.308891	4.57879	0.00256011	0.0389587	protein_coding	1	151132224	151138424	-	LysM domain containing 1
FZD5	ENSG00000163251	0.533505	2.44471	9.80334e-05	0.00322639	protein_coding	2	208627310	208634287	-	frizzled class receptor 5
ALPP	ENSG00000163283	-0.400536	5.30269	0.000224557	0.00642456	protein_coding	2	233243244	233247599	+	alkaline phosphatase, placental
LRRC58	ENSG00000163428	0.28629	6.86532	0.00216903	0.034859	protein_coding	3	120043356	120068186	-	leucine rich repeat containing 58
ADORA1	ENSG00000163485	-0.402543	3.20792	0.00342351	0.0475195	protein_coding	1	203059782	203136533	+	adenosine A1 receptor
AZI2	ENSG00000163512	0.444061	4.54008	1.27004e-05	0.000588128	protein_coding	3	28356494	28390618	-	5-azacytidine induced 2
IFI16	ENSG00000163565	2.30081	6.83782	1.15045e-121	5.19426e-119	protein_coding	1	158969758	159024945	+	interferon gamma inducible protein 16
PPM1K	ENSG00000163644	0.91917	6.03779	7.33707e-27	1.03927e-24	protein_coding	4	89178772	89205921	-	protein phosphatase, Mg2+/Mn2+ dependent 1K
RPL9	ENSG00000163682	-0.369216	8.64355	7.29676e-06	0.000359808	protein_coding	4	39455744	39460568	-	ribosomal protein L9
FYCO1	ENSG00000163820	0.282744	5.72386	0.000969898	0.0193819	protein_coding	3	45959396	46037316	-	FYVE and coiled-coil domain containing 1
RTP3	ENSG00000163825	0.611427	0.681264	0.00114348	0.0219986	protein_coding	3	46538981	46542439	+	receptor transporter protein 3
DTX3L	ENSG00000163840	3.26167	7.09717	1.25812e-240	1.81774e-237	protein_coding	3	122283085	122294050	+	deltex E3 ubiquitin ligase 3L
YEATS2	ENSG00000163872	0.292509	6.48665	0.000757771	0.0162197	protein_coding	3	183415606	183530413	+	YEATS domain containing 2
TKT	ENSG00000163931	-0.275187	8.07901	0.00118449	0.0225178	protein_coding	3	53258723	53290068	-	transketolase
UBXN7	ENSG00000163960	0.270719	6.94859	0.002476	0.0382815	protein_coding	3	196074533	196159345	-	UBX domain protein 7
RNF168	ENSG00000163961	0.270973	5.89665	0.00236725	0.0370741	protein_coding	3	196195654	196230639	-	ring finger protein 168
DNAJB14	ENSG00000164031	0.261214	6.09673	0.00232724	0.0366032	protein_coding	4	100817405	100867883	-	DnaJ heat shock protein family (Hsp40) member B14
SHISA5	ENSG00000164054	0.912599	7.47282	3.47207e-27	4.96677e-25	protein_coding	3	48509197	48542259	-	shisa family member 5
PRSS12	ENSG00000164099	-0.285656	5.45064	0.00180355	0.0306922	protein_coding	4	119201193	119274158	-	serine protease 12
CEP44	ENSG00000164118	0.337922	3.80833	0.00236845	0.0370741	protein_coding	4	175204828	175254531	+	centrosomal protein 44
OTUD4	ENSG00000164164	0.293068	7.11609	0.00141076	0.0256386	protein_coding	4	146031990	146101313	-	OTU deubiquitinase 4
STARD4	ENSG00000164211	0.457369	6.46386	6.4282e-08	4.4226e-06	protein_coding	5	110831731	110848288	-	StAR related lipid transfer domain containing 4
GRPEL2	ENSG00000164284	0.404652	5.40136	7.54905e-05	0.00257845	protein_coding	5	148724993	148734146	+	GrpE like 2, mitochondrial
ERAP1	ENSG00000164307	0.835663	6.31303	3.80971e-17	4.23405e-15	protein_coding	5	96096521	96143803	-	endoplasmic reticulum aminopeptidase 1
ERAP2	ENSG00000164308	0.827564	3.35161	2.56024e-10	2.08985e-08	protein_coding	5	96211643	96255420	+	endoplasmic reticulum aminopeptidase 2
RICTOR	ENSG00000164327	0.390102	7.40338	3.73228e-06	0.000192586	protein_coding	5	38938021	39074510	-	RPTOR independent companion of MTOR complex 2
TLR3	ENSG00000164342	2.29454	2.53145	1.96461e-40	3.593e-38	protein_coding	4	186990306	187009223	+	toll like receptor 3
MB21D1	ENSG00000164430	0.452969	4.62258	0.000122868	0.00391014	protein_coding	6	74123238	74161999	-	cyclic GMP-AMP synthase
RPS14	ENSG00000164587	-0.350633	9.17911	1.83603e-05	0.000789494	protein_coding	5	149822753	149829319	-	ribosomal protein S14
ZNF12	ENSG00000164631	0.336274	5.31845	0.000315497	0.00831319	protein_coding	7	6728064	6746554	-	zinc finger protein 12
SLC29A4	ENSG00000164638	-0.493262	2.7028	0.00189087	0.0316036	protein_coding	7	5314000	5346501	+	solute carrier family 29 member 4
OXR1	ENSG00000164830	0.323804	4.49883	0.0020695	0.0336332	protein_coding	8	107282473	107764922	+	oxidation resistance 1
GPER1	ENSG00000164850	-0.471492	3.79714	5.36679e-05	0.00195422	protein_coding	7	1121844	1133451	+	G protein-coupled estrogen receptor 1
MICALL2	ENSG00000164877	-0.31642	4.33646	0.00331544	0.0464161	protein_coding	7	1468101	1499138	-	MICAL like 2
TMUB1	ENSG00000164897	-0.311632	4.46841	0.00146219	0.0263086	protein_coding	7	150778167	150780633	-	transmembrane and ubiquitin like domain containing 1
NFIL3	ENSG00000165030	0.277501	5.01454	0.00304278	0.0436565	protein_coding	9	94171327	94186144	-	nuclear factor, interleukin 3 regulated
ZHX1	ENSG00000165156	0.344894	5.10798	0.00124191	0.0232725	protein_coding	8	124260696	124287781	-	zinc fingers and homeoboxes 1
HDX	ENSG00000165259	0.878194	3.53851	1.48846e-14	1.5252e-12	protein_coding	X	83572882	83757487	-	highly divergent homeobox
ZNF503	ENSG00000165655	-0.558392	3.68101	0.0029031	0.0423867	protein_coding	10	77157588	77161664	-	zinc finger protein 503
RET	ENSG00000165731	1.02589	0.0559196	1.12947e-05	0.00053155	protein_coding	10	43572475	43625799	+	ret proto-oncogene
CASP7	ENSG00000165806	0.509632	4.88177	1.90293e-07	1.22739e-05	protein_coding	10	115438942	115490662	+	caspase 7
SLC39A13	ENSG00000165915	-0.279735	5.58351	0.00263992	0.0396894	protein_coding	11	47428683	47438047	+	solute carrier family 39 member 13
CPSF2	ENSG00000165934	0.269426	7.51093	0.00220959	0.0352754	protein_coding	14	92588281	92630755	+	cleavage and polyadenylation specific factor 2
IFI27	ENSG00000165949	6.78295	4.62739	8.17333e-265	1.4761e-261	protein_coding	14	94571182	94583033	+	interferon alpha inducible protein 27
ARL5B	ENSG00000165997	0.507235	6.20069	1.51584e-07	9.86528e-06	protein_coding	10	18948334	18970568	+	ADP ribosylation factor like GTPase 5B
CKB	ENSG00000166165	-0.269489	7.56571	0.0017956	0.030593	protein_coding	14	103985996	103989448	-	creatine kinase B
PCBD1	ENSG00000166228	-0.320213	5.08852	0.000686513	0.0152379	protein_coding	10	72642037	72648541	-	pterin-4 alpha-carbinolamine dehydratase 1
RNF169	ENSG00000166439	0.410856	5.09168	4.57421e-05	0.00172554	protein_coding	11	74459913	74553458	+	ring finger protein 169
RPL27A	ENSG00000166441	-0.27539	9.25021	0.000713244	0.0155429	protein_coding	11	8703958	8736306	+	ribosomal protein L27a
B2M	ENSG00000166710	1.22584	9.81964	1.13008e-27	1.68324e-25	protein_coding	15	45003675	45011075	+	beta-2-microglobulin
FAM111A	ENSG00000166801	0.362912	6.50958	3.11232e-05	0.00124449	protein_coding	11	58910221	58922512	+	family with sequence similarity 111 member A
PATL1	ENSG00000166889	0.373551	6.86403	2.54677e-05	0.00104237	protein_coding	11	59404189	59436453	-	PAT1 homolog 1, processing body mRNA decay factor
CERCAM	ENSG00000167123	-0.336868	4.98944	0.00280961	0.0416341	protein_coding	9	131174030	131199626	+	cerebral endothelial cell adhesion molecule
ENDOG	ENSG00000167136	-0.596574	2.13725	2.12754e-05	0.000889973	protein_coding	9	131580753	131584956	+	endonuclease G
ZNF91	ENSG00000167232	0.337142	3.79434	0.00197351	0.0324383	protein_coding	19	23487793	23578362	-	zinc finger protein 91
IGF2	ENSG00000167244	-0.353444	6.4288	0.00324477	0.0455593	protein_coding	11	2150342	2170833	-	insulin like growth factor 2
GPX4	ENSG00000167468	-0.403332	6.99766	0.000135913	0.00423205	protein_coding	19	1103936	1106787	+	glutathione peroxidase 4
TRAPPC2L	ENSG00000167515	-0.281616	4.98439	0.00316612	0.0449447	protein_coding	16	88922628	88929094	+	trafficking protein particle complex 2 like
RPL13	ENSG00000167526	-0.316835	9.36997	0.00013381	0.00417557	protein_coding	16	89627065	89630950	+	ribosomal protein L13
ZNF283	ENSG00000167637	0.447026	2.43613	0.000890914	0.0183361	protein_coding	19	44331444	44353307	+	zinc finger protein 283
EEF2	ENSG00000167658	-0.38338	11.3411	1.67178e-05	0.000731938	protein_coding	19	3976054	3985467	-	eukaryotic translation elongation factor 2
HSD11B1L	ENSG00000167733	-0.41276	3.47563	0.000297417	0.00793833	protein_coding	19	5680615	5688533	+	hydroxysteroid 11-beta dehydrogenase 1 like
OTUB1	ENSG00000167770	-0.265905	6.1234	0.00229404	0.0363823	protein_coding	11	63753325	63769283	+	OTU deubiquitinase, ubiquitin aldehyde binding 1
CDK2AP2	ENSG00000167797	-0.272016	6.58865	0.00139628	0.0254394	protein_coding	11	67273968	67276120	-	cyclin dependent kinase 2 associated protein 2
NUDT8	ENSG00000167799	-0.464954	2.5701	0.00287325	0.0421449	protein_coding	11	67395409	67397401	-	nudix hydrolase 8
TMEM88	ENSG00000167874	-0.368111	5.5211	8.62824e-05	0.00290585	protein_coding	17	7758383	7759417	+	transmembrane protein 88
FTH1	ENSG00000167996	-0.447002	7.65121	6.6323e-06	0.00032929	protein_coding	11	61727190	61735132	-	ferritin heavy chain 1
TRANK1	ENSG00000168016	2.75516	4.98691	1.88721e-89	5.92747e-87	protein_coding	3	36868311	36986548	-	tetratricopeptide repeat and ankyrin repeat containing 1
BATF2	ENSG00000168062	2.72265	1.40786	1.67488e-34	2.84691e-32	protein_coding	11	64755415	64764517	-	basic leucine zipper ATF-like transcription factor 2
NUDT16L1	ENSG00000168101	-0.305115	4.38415	0.00281975	0.0417416	protein_coding	16	4743695	4745860	+	nudix hydrolase 16 like 1
NT5DC2	ENSG00000168268	-0.620113	6.9582	4.9239e-14	4.90625e-12	protein_coding	3	52558386	52569070	-	5'-nucleotidase domain containing 2
MGAT2	ENSG00000168282	-0.653014	0.416307	0.00205575	0.0334853	protein_coding	14	50087489	50090198	+	alpha-1,6-mannosyl-glycoprotein 2-beta-N-acetylglucosaminyltransferase
IRF2	ENSG00000168310	0.670808	4.71547	4.94667e-10	3.93005e-08	protein_coding	4	185308867	185395734	-	interferon regulatory factor 2
TAP1	ENSG00000168394	1.9625	5.98738	7.12434e-58	1.80583e-55	protein_coding	6	32812986	32821755	-	transporter 1, ATP binding cassette subfamily B member
MLKL	ENSG00000168404	0.914705	3.75095	1.60822e-14	1.63631e-12	protein_coding	16	74705753	74734858	-	mixed lineage kinase domain like pseudokinase
GDNF	ENSG00000168621	-0.486441	3.28159	4.14478e-05	0.00158843	protein_coding	5	37812779	37839788	-	glial cell derived neurotrophic factor
NDUFS5	ENSG00000168653	-0.347038	5.8238	7.17328e-05	0.00247906	protein_coding	1	39491990	39500308	+	NADH:ubiquinone oxidoreductase subunit S5
LGALS9	ENSG00000168961	1.4612	2.15467	1.24811e-11	1.12004e-09	protein_coding	17	25956824	25976586	+	galectin 9
FEM1B	ENSG00000169018	0.301107	6.93904	0.000268002	0.00731964	protein_coding	15	68570141	68588203	+	fem-1 homolog B
SLC25A6	ENSG00000169100	-0.465892	9.1935	4.79872e-08	3.36563e-06	protein_coding	X	1505045	1511617	-	solute carrier family 25 member 6
NMD3	ENSG00000169251	0.272254	6.18759	0.00249965	0.0384611	protein_coding	3	160822484	160971320	+	NMD3 ribosome export adaptor
B3GALNT1	ENSG00000169255	0.419381	4.41968	0.000439267	0.0109047	protein_coding	3	160801671	160823172	-	beta-1,3-N-acetylgalactosaminyltransferase 1 (globoside blood group)
DCXR	ENSG00000169738	-0.316061	4.45276	0.00334807	0.0467544	protein_coding	17	79993012	79995608	-	dicarbonyl and L-xylulose reductase
TRIM56	ENSG00000169871	0.627024	5.30585	4.39852e-11	3.73823e-09	protein_coding	7	100728720	100735017	+	tripartite motif containing 56
MAP3K2	ENSG00000169967	0.276938	5.98129	0.00132325	0.0245107	protein_coding	2	128056306	128146041	-	mitogen-activated protein kinase kinase kinase 2
SF3B5	ENSG00000169976	-0.34888	5.8598	0.000102682	0.00334887	protein_coding	6	144416018	144416754	-	splicing factor 3b subunit 5
CRTAP	ENSG00000170275	-0.294194	7.63547	0.000798192	0.0168847	protein_coding	3	33155471	33189265	+	cartilage associated protein
NFXL1	ENSG00000170448	0.281722	5.19113	0.00298614	0.0430591	protein_coding	4	47849257	47916653	-	nuclear transcription factor, X-box binding like 1
SERPINB9	ENSG00000170542	0.413897	3.37283	0.000341784	0.00883381	protein_coding	6	2887500	2903514	-	serpin family B member 9
STAT2	ENSG00000170581	1.59125	7.47256	1.50058e-27	2.18993e-25	protein_coding	12	56735381	56753939	-	signal transducer and activator of transcription 2
FOXN2	ENSG00000170802	0.561836	5.40711	1.27729e-07	8.46527e-06	protein_coding	2	48541776	48606433	+	forkhead box N2
RPS9	ENSG00000170889	-0.258891	8.59827	0.00164017	0.0284822	protein_coding	19	54704610	54752862	+	ribosomal protein S9
MSANTD4	ENSG00000170903	0.284664	5.09883	0.00298318	0.0430591	protein_coding	11	105866350	105893130	-	Myb/SANT DNA binding domain containing 4 with coiled-coils
NDUFA3	ENSG00000170906	-0.308302	5.53756	0.000611722	0.0140959	protein_coding	19	54606036	54612564	+	NADH:ubiquinone oxidoreductase subunit A3
SOX7	ENSG00000171056	0.462286	1.97692	0.00247738	0.0382815	protein_coding	8	10581278	10697357	-	SRY-box transcription factor 7
PRKCE	ENSG00000171132	0.360023	4.33229	0.000357266	0.00915237	protein_coding	2	45878484	46415129	+	protein kinase C epsilon
SCAND1	ENSG00000171222	-0.434922	5.2192	5.48897e-06	0.000277289	protein_coding	20	34541539	34547394	-	SCAN domain containing 1
TMEM37	ENSG00000171227	-0.549595	1.88866	0.000257089	0.0070886	protein_coding	2	120187477	120196096	+	transmembrane protein 37
ZNF562	ENSG00000171466	0.341974	4.97675	0.000901151	0.0184678	protein_coding	19	9759330	9785776	-	zinc finger protein 562
ZNF561	ENSG00000171469	0.318103	4.97456	0.0011513	0.0220318	protein_coding	19	9715356	9732075	-	zinc finger protein 561
PTGER4	ENSG00000171522	-0.438214	2.75175	0.000974984	0.0194297	protein_coding	5	40679600	40693837	+	prostaglandin E receptor 4
MAP6	ENSG00000171533	-0.548228	2.12257	0.000160824	0.00488283	protein_coding	11	75297963	75380165	-	microtubule associated protein 6
ATF7IP	ENSG00000171681	0.326904	6.31188	0.000179391	0.00535506	protein_coding	12	14518610	14651697	+	activating transcription factor 7 interacting protein
RPS21	ENSG00000171858	-0.353005	8.26611	3.81865e-05	0.00147518	protein_coding	20	60962172	60963576	+	ribosomal protein S21
RPS7	ENSG00000171863	-0.373204	8.49627	7.78307e-06	0.000379288	protein_coding	2	3622795	3628509	+	ribosomal protein S7
TVP23B	ENSG00000171928	0.29831	5.31303	0.00205484	0.0334853	protein_coding	17	18684308	18710027	+	trans-golgi network vesicle protein 23 homolog B
QARS	ENSG00000172053	-0.275442	7.54325	0.000823351	0.0172403	protein_coding	3	49133365	49142553	-	glutaminyl-tRNA synthetase 1
SLFN12	ENSG00000172123	0.380712	5.26697	5.84611e-05	0.00207662	protein_coding	17	33738079	33760302	-	schlafen family member 12
ISG20	ENSG00000172183	1.76165	1.79039	1.38775e-27	2.04594e-25	protein_coding	15	89179384	89199714	+	interferon stimulated exonuclease gene 20
CSDC2	ENSG00000172346	-0.369997	4.38076	0.000865298	0.0179109	protein_coding	22	41956767	41973745	+	cold shock domain containing C2
GTPBP2	ENSG00000172432	0.490827	6.84728	7.00537e-09	5.27154e-07	protein_coding	6	43573053	43596899	-	GTP binding protein 2
PPP1CA	ENSG00000172531	-0.250701	7.91247	0.0022255	0.0354901	protein_coding	11	67165654	67188654	-	protein phosphatase 1 catalytic subunit alpha
DCP2	ENSG00000172795	0.347162	6.56361	6.16991e-05	0.00217953	protein_coding	5	112312399	112356667	+	decapping mRNA 2
MYD88	ENSG00000172936	0.801607	5.72004	1.97579e-15	2.06857e-13	protein_coding	3	38179969	38184513	+	MYD88 innate immune signal transduction adaptor
ZNF680	ENSG00000173041	0.47031	2.97486	0.000985876	0.0195539	protein_coding	7	63980262	64023484	-	zinc finger protein 680
TRMT112	ENSG00000173113	-0.249075	6.28911	0.0029717	0.0430591	protein_coding	11	64083932	64085556	-	tRNA methyltransferase subunit 11-2
NOC3L	ENSG00000173145	0.410955	5.7568	0.000697523	0.0153625	protein_coding	10	96075004	96122716	-	NOC3 like DNA replication regulator
RHOD	ENSG00000173156	-0.525472	3.17306	3.64647e-05	0.00141245	protein_coding	11	66824289	66839484	+	ras homolog family member D
PARP14	ENSG00000173193	2.70112	7.88739	2.15909e-126	1.03982e-123	protein_coding	3	122399465	122449687	+	poly(ADP-ribose) polymerase family member 14
MZT2A	ENSG00000173272	-0.348098	5.10766	0.000277335	0.00748959	protein_coding	2	132222473	132250316	-	mitotic spindle organizing protein 2A
ZBTB21	ENSG00000173276	0.511083	5.37005	1.50628e-06	8.60186e-05	protein_coding	21	43406940	43430496	-	zinc finger and BTB domain containing 21
THAP2	ENSG00000173451	0.416485	2.6473	0.00122058	0.0230523	protein_coding	12	72056789	72074419	+	THAP domain containing 2
TNFRSF10D	ENSG00000173530	-1.37218	4.43315	9.87884e-40	1.78412e-37	protein_coding	8	22993101	23021543	-	TNF receptor superfamily member 10d
CSPG4	ENSG00000173546	-0.331895	5.63376	0.00196504	0.0323359	protein_coding	15	75966663	76005189	-	chondroitin sulfate proteoglycan 4
PC	ENSG00000173599	-0.320773	6.14516	0.000420298	0.0105519	protein_coding	11	66615704	66725847	-	pyruvate carboxylase
LRFN4	ENSG00000173621	-0.32232	5.42811	0.00081571	0.0171299	protein_coding	11	66624118	66627946	+	leucine rich repeat and fibronectin type III domain containing 4
CNP	ENSG00000173786	0.632258	7.86663	4.28562e-13	4.12791e-11	protein_coding	17	40118759	40129749	+	2',3'-cyclic nucleotide 3' phosphodiesterase
RNF213	ENSG00000173821	0.534224	7.92024	5.69969e-07	3.50422e-05	protein_coding	17	78234665	78372586	+	ring finger protein 213
PHC3	ENSG00000173889	0.272097	6.09479	0.00155492	0.027609	protein_coding	3	169804520	169899537	-	polyhomeotic homolog 3
SPTBN2	ENSG00000173898	-0.28469	6.85016	0.000669781	0.0150024	protein_coding	11	66452719	66496697	-	spectrin beta, non-erythrocytic 2
RP11-23P13.6	ENSG00000174171	0.580026	3.31459	1.48429e-05	0.000657071	antisense	15	42184991	42190773	+
MGA	ENSG00000174197	0.264751	6.89667	0.00131064	0.0243709	protein_coding	15	41913422	42062141	+	MAX dimerization protein MGA
GLIS1	ENSG00000174332	-0.341113	4.77756	0.00274395	0.0409552	protein_coding	1	53971910	54199877	-	GLIS family zinc finger 1
RPL4	ENSG00000174444	-0.273236	10.99	0.000792689	0.0167929	protein_coding	15	66790355	66816870	-	ribosomal protein L4
NR1D2	ENSG00000174738	0.334933	6.31462	0.000156917	0.00479311	protein_coding	3	23986751	24022109	+	nuclear receptor subfamily 1 group D member 2
RPL15	ENSG00000174748	-0.329565	9.3531	7.39778e-05	0.00253277	protein_coding	3	23958036	23965183	+	ribosomal protein L15
THAP6	ENSG00000174796	0.327908	4.01477	0.00193211	0.0320863	protein_coding	4	76439156	76475683	+	THAP domain containing 6
CNIH2	ENSG00000174871	-0.463851	2.21917	0.00311691	0.0445431	protein_coding	11	66045661	66052772	+	cornichon family AMPA receptor auxiliary protein 2
RAB1B	ENSG00000174903	-0.28698	6.42923	0.000493389	0.0119525	protein_coding	11	66036004	66044963	+	RAB1B, member RAS oncogene family
ASPHD1	ENSG00000174939	-0.39426	3.82207	0.000974369	0.0194297	protein_coding	16	29911696	29931185	+	aspartate beta-hydroxylase domain containing 1
CHST2	ENSG00000175040	-0.318416	4.29411	0.00298306	0.0430591	protein_coding	3	142838173	142841800	+	carbohydrate sulfotransferase 2
FAM211A-AS1	ENSG00000175061	-0.297773	8.75204	0.000252172	0.00701417	processed_transcript	17	16342136	16381992	+
VCPIP1	ENSG00000175073	0.324115	5.37678	0.000506868	0.0121851	protein_coding	8	67540722	67579452	-	valosin containing protein interacting protein 1
SPSB4	ENSG00000175093	-0.407283	2.71499	0.00241028	0.0376066	protein_coding	3	140770244	140867453	+	splA/ryanodine receptor domain and SOCS box containing 4
ZNF654	ENSG00000175105	0.299521	4.65686	0.00243814	0.0379384	protein_coding	3	88188254	88193815	+	zinc finger protein 654
MARCKSL1	ENSG00000175130	-0.486019	6.0489	2.36777e-06	0.000127173	protein_coding	1	32799433	32801980	-	MARCKS like 1
DDIT3	ENSG00000175197	0.649804	2.74934	8.92477e-06	0.000431254	protein_coding	12	57910371	57914300	-	DNA damage inducible transcript 3
EIF3F	ENSG00000175390	-0.237503	7.73984	0.0031211	0.0445446	protein_coding	11	7991798	8023409	+	eukaryotic translation initiation factor 3 subunit F
TBC1D10C	ENSG00000175463	-0.864202	1.36609	0.000696815	0.0153625	protein_coding	11	67171386	67177560	+	TBC1 domain family member 10C
ERCC4	ENSG00000175595	0.318955	4.12633	0.00279177	0.0414548	protein_coding	16	14014014	14046202	+	ERCC excision repair 4, endonuclease catalytic subunit
RMI2	ENSG00000175643	0.318697	4.04245	0.00286358	0.0420513	protein_coding	16	11343476	11445619	+	RecQ mediated genome instability 2
B3GALT6	ENSG00000176022	-0.296979	5.71339	0.000746418	0.0160241	protein_coding	1	1167629	1170421	+	beta-1,3-galactosyltransferase 6
MTX3	ENSG00000177034	0.318096	4.70843	0.00139508	0.0254394	protein_coding	5	79275584	79287082	-	metaxin 3
TMEM80	ENSG00000177042	-0.318467	4.93656	0.00242056	0.0377262	protein_coding	11	695428	705028	+	transmembrane protein 80
EPS8L2	ENSG00000177106	-0.356215	6.67833	0.00019909	0.00586047	protein_coding	11	694438	727727	+	EPS8 like 2
FBXO39	ENSG00000177294	5.20478	-0.422459	5.2009e-37	9.27686e-35	protein_coding	17	6679542	6700420	+	F-box protein 39
C8orf31	ENSG00000177335	1.19945	2.86423	1.06029e-07	7.15844e-06	protein_coding	8	144120626	144141359	+
SAMD9L	ENSG00000177409	2.97476	6.77541	1.42658e-118	6.24582e-116	protein_coding	7	92759368	92777682	-	sterile alpha motif domain containing 9 like
PAWR	ENSG00000177425	0.280503	7.31766	0.00135514	0.0249814	protein_coding	12	79968759	80084877	-	pro-apoptotic WT1 regulator
ZBTB33	ENSG00000177485	0.434645	5.82136	5.82366e-07	3.55022e-05	protein_coding	X	119384607	119392253	+	zinc finger and BTB domain containing 33
CD163L1	ENSG00000177675	0.539983	2.44105	0.00294195	0.042719	protein_coding	12	7499281	7632493	-	CD163 molecule like 1
POLR2L	ENSG00000177700	-0.474426	6.46465	5.52213e-08	3.83576e-06	protein_coding	11	837356	842545	-	RNA polymerase II subunit L
FAM20C	ENSG00000177706	-0.40896	4.60806	0.00165191	0.0286516	protein_coding	7	192969	300711	+	FAM20C golgi associated secretory pathway kinase
ZNF620	ENSG00000177842	0.465675	3.01831	0.000286159	0.00767329	protein_coding	3	40547483	40560227	+	zinc finger protein 620
ZNF619	ENSG00000177873	0.494234	2.43515	0.00071945	0.015631	protein_coding	3	40518604	40531727	+	zinc finger protein 619
ZBTB41	ENSG00000177888	0.358738	4.01516	0.000700407	0.0154026	protein_coding	1	197122810	197169672	-	zinc finger and BTB domain containing 41
ODF3B	ENSG00000177989	2.4447	1.91421	4.47401e-35	7.788e-33	protein_coding	22	50968139	50971009	-	outer dense fiber of sperm tails 3B
PLEC	ENSG00000178209	-0.267691	8.9648	0.00169035	0.0292481	protein_coding	8	144989321	145050902	-	plectin
ZNF543	ENSG00000178229	0.466345	2.11119	0.00271119	0.0405499	protein_coding	19	57831877	57842144	+	zinc finger protein 543
CTXN1	ENSG00000178531	-0.701558	2.37385	5.80589e-07	3.55022e-05	protein_coding	19	7989372	7991051	-	cortexin 1
PARP10	ENSG00000178685	2.17998	6.02848	6.91123e-50	1.53621e-47	protein_coding	8	145051321	145086940	-	poly(ADP-ribose) polymerase family member 10
SPTY2D1	ENSG00000179119	0.290367	5.23774	0.00363198	0.0494579	protein_coding	11	18627948	18656338	-	SPT2 chromatin protein domain containing 1
GADD45GIP1	ENSG00000179271	-0.281417	5.58685	0.00297583	0.0430591	protein_coding	19	13064972	13068050	-	GADD45G interacting protein 1
GCC1	ENSG00000179562	0.383326	4.4701	0.000146485	0.00452224	protein_coding	7	127220672	127233665	-	GRIP and coiled-coil domain containing 1
ZFPM1	ENSG00000179588	-0.456485	2.81995	0.000850034	0.0176455	protein_coding	16	88519725	88603424	+	zinc finger protein, FOG family member 1
RP11-169K16.9	ENSG00000179743	-0.597502	2.22272	0.000133246	0.00416697	antisense	1	16160560	16174642	-
FZD2	ENSG00000180340	-0.299311	7.78308	0.00252913	0.0386676	protein_coding	17	42634925	42636907	+	frizzled class receptor 2
ZNF571	ENSG00000180479	0.583051	1.09566	0.00252747	0.0386676	protein_coding	19	38045684	38085673	-	zinc finger protein 571
ZNF594	ENSG00000180626	0.553384	4.11289	1.29971e-07	8.53558e-06	protein_coding	17	5082831	5095178	-	zinc finger protein 594
PCGF5	ENSG00000180628	0.487937	6.24647	5.47248e-07	3.37891e-05	protein_coding	10	92979908	93044088	+	polycomb group ring finger 5
SHISA2	ENSG00000180730	-0.550468	4.56674	0.000819674	0.0171882	protein_coding	13	26618735	26625169	-	shisa family member 2
HIST3H2A	ENSG00000181218	-0.450324	3.15127	0.000641203	0.0145788	protein_coding	1	228645065	228645560	-	H2A.W histone
ZNF322	ENSG00000181315	0.328268	3.60549	0.00352255	0.0484703	protein_coding	6	26636518	26659980	-	zinc finger protein 322
DDX60L	ENSG00000181381	2.4302	6.54005	2.88397e-153	1.6026e-150	protein_coding	4	169277886	169458937	-	DExD/H-box 60 like
PHLDA2	ENSG00000181649	-0.37438	3.18071	0.0032389	0.045521	protein_coding	11	2949503	2950685	-	pleckstrin homology like domain family A member 2
PLAG1	ENSG00000181690	0.366907	4.48004	0.00025331	0.0070246	protein_coding	8	57073463	57123883	-	PLAG1 zinc finger
IBA57	ENSG00000181873	-0.454361	3.56657	0.000104661	0.00339809	protein_coding	1	228353516	228369958	+	iron-sulfur cluster assembly factor IBA57
MRPL41	ENSG00000182154	-0.392113	5.07248	3.10193e-05	0.00124449	protein_coding	9	140445651	140447007	+	mitochondrial ribosomal protein L41
UBA7	ENSG00000182179	1.64685	4.82072	2.54485e-14	2.57119e-12	protein_coding	3	49842640	49851379	-	ubiquitin like modifier activating enzyme 7
C1S	ENSG00000182326	2.0958	1.96768	2.19836e-32	3.6093e-30	protein_coding	12	7096351	7178336	+	complement C1s
BGN	ENSG00000182492	-0.389843	7.39762	0.000968933	0.0193819	protein_coding	X	152760397	152775012	+	biglycan
CEP97	ENSG00000182504	0.348016	4.67837	0.000727204	0.0157183	protein_coding	3	101442769	101489406	+	centrosomal protein 97
CRIP2	ENSG00000182809	-0.482759	4.24332	0.000118072	0.00379934	protein_coding	14	105939299	105946499	+	cysteine rich protein 2
RPL35A	ENSG00000182899	-0.315241	8.133	0.000122337	0.00390214	protein_coding	3	197676858	197683481	+	ribosomal protein L35a
ZNF320	ENSG00000182986	0.435556	2.77047	0.000540876	0.0128318	protein_coding	19	53367043	53400946	-	zinc finger protein 320
LSMD1	ENSG00000183011	-0.466461	5.30305	3.86708e-07	2.4292e-05	protein_coding	17	7760003	7788556	-	N(alpha)-acetyltransferase 38, NatC auxiliary subunit
CEP57L1	ENSG00000183137	0.350694	4.26525	0.00212784	0.0343498	protein_coding	6	109416313	109485135	+	centrosomal protein 57 like 1
CHST6	ENSG00000183196	-0.520766	1.58343	0.00171742	0.0295748	protein_coding	16	75510949	75529282	-	carbohydrate sulfotransferase 6
ASB7	ENSG00000183475	0.355124	5.01341	0.000118828	0.00381516	protein_coding	15	101142739	101191910	+	ankyrin repeat and SOCS box containing 7
MX2	ENSG00000183486	5.3336	7.13741	4.95973e-215	5.51217e-212	protein_coding	21	42733870	42781317	+	MX dynamin like GTPase 2
FAM101B	ENSG00000183688	-0.602406	6.30625	1.36163e-07	8.90173e-06	protein_coding	17	289769	295730	-	refilin B
ANKRD45	ENSG00000183831	2.57261	-0.0538335	7.60517e-23	1.02691e-20	protein_coding	1	173578700	173639001	-	ankyrin repeat domain 45
ARSI	ENSG00000183876	-0.343439	3.82395	0.00207264	0.0336332	protein_coding	5	149675906	149718870	-	arylsulfatase family member I
NPW	ENSG00000183971	-0.446458	2.28602	0.00211633	0.0342022	protein_coding	16	2059927	2070756	+	neuropeptide W
ACTG1	ENSG00000184009	-0.342173	11.3358	5.36977e-05	0.00195422	protein_coding	17	79476997	79490873	-	actin gamma 1
FAM120C	ENSG00000184083	0.516112	4.16007	1.11718e-06	6.56136e-05	protein_coding	X	54094757	54209714	-	family with sequence similarity 120C
ACOT1	ENSG00000184227	0.464099	2.02544	0.00303581	0.0435997	protein_coding	14	74003818	74010498	+	acyl-CoA thioesterase 1
SLIT3	ENSG00000184347	-0.776131	2.23402	5.34365e-05	0.00195422	protein_coding	5	168088745	168728133	-	slit guidance ligand 3
CSF1	ENSG00000184371	0.538995	4.77388	1.43361e-05	0.000649306	protein_coding	1	110452864	110473614	+	colony stimulating factor 1
SEPT5	ENSG00000184702	-0.445467	2.70174	0.00104666	0.0204908	protein_coding	22	19701987	19712295	+	septin 5
RBM43	ENSG00000184898	0.596686	3.80094	1.64563e-06	9.28755e-05	protein_coding	2	152104454	152118393	-	RNA binding motif protein 43
JAG2	ENSG00000184916	-0.546425	2.31851	0.0006219	0.0142622	protein_coding	14	105607318	105635161	-	jagged canonical Notch ligand 2
PTRHD1	ENSG00000184924	-0.40596	3.40824	0.00145926	0.0262885	protein_coding	2	25012603	25016251	-	peptidyl-tRNA hydrolase domain containing 1
USP18	ENSG00000184979	3.57308	4.6732	3.96406e-193	3.36898e-190	protein_coding	22	18632666	18660164	+	ubiquitin specific peptidase 18
IFITM2	ENSG00000185201	1.0605	6.59541	2.44021e-27	3.52562e-25	protein_coding	11	307631	315272	+	interferon induced transmembrane protein 2
GP1BA	ENSG00000185245	-0.545201	1.48366	0.00138701	0.0254309	protein_coding	17	4835592	4838325	+	glycoprotein Ib platelet subunit alpha
CD24P4	ENSG00000185275	-0.386657	4.71112	0.00173193	0.0297891	pseudogene	Y	21154353	21154595	-
GAS2L1	ENSG00000185340	-0.357829	4.99917	0.000167558	0.0050646	protein_coding	22	29702572	29708774	+	growth arrest specific 2 like 1
SP140L	ENSG00000185404	0.615685	5.46796	4.11124e-11	3.51475e-09	protein_coding	2	231191899	231268447	+	SP140 nuclear body protein like
IRF7	ENSG00000185507	3.19451	6.07619	1.66886e-169	1.26904e-166	protein_coding	11	612553	615999	-	interferon regulatory factor 7
CTD-2287O16.1	ENSG00000185641	-0.640135	2.12927	6.61693e-05	0.00232607	pseudogene	5	115387607	115387986	-
ANKFY1	ENSG00000185722	0.347886	7.75534	1.82049e-05	0.000785146	protein_coding	17	4067201	4167274	-	ankyrin repeat and FYVE domain containing 1
IFIT1	ENSG00000185745	3.90275	7.76271	3.83688e-229	4.61961e-226	protein_coding	10	91152303	91163745	+	interferon induced protein with tetratricopeptide repeats 1
CXorf38	ENSG00000185753	0.437668	3.36036	0.000117642	0.00379395	protein_coding	X	40488285	40506819	-	chromosome X open reading frame 38
NAT8L	ENSG00000185818	-0.323486	5.31274	0.000436291	0.0108835	protein_coding	4	2061239	2070816	+	N-acetyltransferase 8 like
TRIM69	ENSG00000185880	1.8008	5.49958	9.43724e-67	2.52499e-64	protein_coding	15	45021186	45060027	+	tripartite motif containing 69
IFITM1	ENSG00000185885	4.89758	6.02029	1.08082e-165	7.43605e-163	protein_coding	11	313506	315272	+	interferon induced transmembrane protein 1
ZNF566	ENSG00000186017	0.434301	2.99188	0.0008538	0.0176983	protein_coding	19	36936021	36980804	-	zinc finger protein 566
ZNF555	ENSG00000186300	0.395673	3.20648	0.000987983	0.0195539	protein_coding	19	2841433	2860482	+	zinc finger protein 555
RPS23	ENSG00000186468	-0.331761	6.09149	0.000128975	0.00406864	protein_coding	5	81569177	81574396	-	ribosomal protein S23
BTN3A2	ENSG00000186470	1.13297	4.75596	8.59492e-17	9.3368e-15	protein_coding	6	26365387	26378546	+	butyrophilin subfamily 3 member A2
PCLO	ENSG00000186472	0.37451	4.97058	0.000631908	0.0144459	protein_coding	7	82383329	82792246	-	piccolo presynaptic cytomatrix protein
MIR22HG	ENSG00000186594	-0.4652	5.80644	1.34644e-06	7.87588e-05	lincRNA	17	1614805	1620468	-
PRR5	ENSG00000186654	-0.438029	3.09492	0.000484845	0.011789	protein_coding	22	45064593	45133561	+	proline rich 5
NAP1L1	ENSG00000187109	-0.273506	9.25815	0.00342385	0.0475195	protein_coding	12	76438670	76478813	-	nucleosome assembly protein 1 like 1
ISG15	ENSG00000187608	3.90302	7.45571	1.39761e-306	5.04816e-303	protein_coding	1	948803	949920	+	ISG15 ubiquitin like modifier
LIN28B	ENSG00000187772	0.383492	4.53808	0.00108503	0.0210706	protein_coding	6	105404923	105531207	+	lin-28 homolog B
ZSCAN23	ENSG00000187987	0.567781	2.20891	0.00018251	0.00543693	protein_coding	6	28399707	28411279	-	zinc finger and SCAN domain containing 23
RAB42	ENSG00000188060	0.484607	2.51085	0.00122824	0.0231364	protein_coding	1	28918712	28921955	+	RAB42, member RAS oncogene family
AGRN	ENSG00000188157	0.810187	8.73668	2.65113e-22	3.48213e-20	protein_coding	1	955503	991496	+	agrin
RUFY4	ENSG00000188282	2.34408	0.268385	3.34845e-18	3.83956e-16	protein_coding	2	218899683	218955304	+	RUN and FYVE domain containing 4
HES4	ENSG00000188290	1.88239	3.83513	1.46064e-53	3.45956e-51	protein_coding	1	934342	935552	-	hes family bHLH transcription factor 4
PLSCR1	ENSG00000188313	3.10597	6.54416	7.06182e-231	9.27538e-228	protein_coding	3	146232967	146262651	-	phospholipid scramblase 1
NANOS1	ENSG00000188613	-0.436532	4.05227	0.000257915	0.00709783	protein_coding	10	120789228	120793854	+	nanos C2HC-type zinc finger 1
DPYD	ENSG00000188641	0.357683	4.01977	0.00121347	0.022948	protein_coding	1	97543299	98386605	-	dihydropyrimidine dehydrogenase
ZNF548	ENSG00000188785	0.33283	3.46872	0.00266414	0.0399704	protein_coding	19	57901218	57912786	+	zinc finger protein 548
MTF1	ENSG00000188786	0.403699	5.12527	2.35184e-05	0.000973622	protein_coding	1	38275239	38325292	-	metal regulatory transcription factor 1
ENTPD8	ENSG00000188833	-0.759957	0.0732166	0.00102165	0.0200555	protein_coding	9	140328816	140336268	-	ectonucleoside triphosphate diphosphohydrolase 8
RPL14	ENSG00000188846	-0.347488	9.19693	2.25272e-05	0.000935269	protein_coding	3	40498783	40503861	+	ribosomal protein L14
ZNF567	ENSG00000189042	0.392812	2.67588	0.00259166	0.0392087	protein_coding	19	37178514	37218603	+	zinc finger protein 567
H1F0	ENSG00000189060	0.555972	8.32817	1.25469e-07	8.3538e-06	protein_coding	22	38201114	38203442	+	H1.0 linker histone
ZNF600	ENSG00000189190	0.524242	1.31602	0.00313532	0.0446296	protein_coding	19	53267448	53290044	-	zinc finger protein 600
LIN54	ENSG00000189308	0.339162	5.08031	0.00196465	0.0323359	protein_coding	4	83831126	83934079	-	lin-54 DREAM MuvB core complex component
TDRD7	ENSG00000196116	1.31319	5.07294	1.1437e-42	2.20323e-40	protein_coding	9	100174232	100258407	+	tudor domain containing 7
SPATS2L	ENSG00000196141	0.556364	7.07102	5.23661e-11	4.39875e-09	protein_coding	2	201170604	201346986	+	spermatogenesis associated serine rich 2 like
EEF1A1P5	ENSG00000196205	-0.370767	5.83082	2.53496e-05	0.00104049	pseudogene	9	135894816	135896553	+
LCOR	ENSG00000196233	0.291246	5.75911	0.00156331	0.0276798	protein_coding	10	98592017	98740800	+	ligand dependent nuclear receptor corepressor
ZNF107	ENSG00000196247	0.561593	4.28336	0.000164767	0.00499067	protein_coding	7	64126511	64171404	+	zinc finger protein 107
ZNF140	ENSG00000196387	0.389738	3.57295	0.000580127	0.0135319	protein_coding	12	133656424	133684130	+	zinc finger protein 140
NCOR2	ENSG00000196498	-0.287869	8.36621	0.0016231	0.028322	protein_coding	12	124808961	125052135	-	nuclear receptor corepressor 2
SLC6A9	ENSG00000196517	0.608735	3.00634	1.78356e-06	9.94936e-05	protein_coding	1	44457172	44497139	-	solute carrier family 6 member 9
SULF2	ENSG00000196562	-0.566956	2.90191	0.00178281	0.0304468	protein_coding	20	46285092	46415360	-	sulfatase 2
ZNF136	ENSG00000196646	0.530746	2.71153	5.76142e-05	0.00207584	protein_coding	19	12273879	12300064	+	zinc finger protein 136
CD47	ENSG00000196776	0.490158	5.88166	9.53824e-06	0.000457835	protein_coding	3	107762145	107809872	-	CD47 molecule
C6orf106	ENSG00000196821	0.390968	7.02797	3.59438e-06	0.000186135	protein_coding	6	34555065	34664636	-	inflammation and lipid regulator with UBA-like and NBR1-like domains
ZNF252P	ENSG00000196922	0.30229	4.74869	0.00192905	0.032074	pseudogene	8	146198975	146228281	-
PDLIM7	ENSG00000196923	-0.261728	8.29225	0.00119	0.0225928	protein_coding	5	176910395	176924607	-	PDZ and LIM domain 7
CASP4	ENSG00000196954	0.665501	4.97413	2.59173e-08	1.86295e-06	protein_coding	11	104813593	104840163	-	caspase 4
ZNF441	ENSG00000197044	0.557121	2.27272	6.89718e-05	0.00240637	protein_coding	19	11877815	11894893	+	zinc finger protein 441
ZNF420	ENSG00000197050	0.535642	2.4725	0.000215101	0.00620195	protein_coding	19	37498759	37621216	+	zinc finger protein 420
ZNF772	ENSG00000197128	0.396731	3.25523	0.00218257	0.0350003	protein_coding	19	57978031	57988938	-	zinc finger protein 772
ACSL5	ENSG00000197142	0.893018	-0.103504	0.000196997	0.00582046	protein_coding	10	114133776	114188138	+	acyl-CoA synthetase long chain family member 5
EIF4BP6	ENSG00000197258	-0.581387	1.12213	0.000889363	0.0183303	pseudogene	7	104308196	104310023	+
GTF2E2	ENSG00000197265	0.297825	5.58983	0.00140491	0.0255644	protein_coding	8	30435835	30515768	-	general transcription factor IIE subunit 2
FITM2	ENSG00000197296	-0.425382	4.31091	9.2297e-05	0.00307969	protein_coding	20	42931478	42939809	-	fat storage inducing transmembrane protein 2
DACT3	ENSG00000197380	-0.628496	1.08086	0.0014845	0.0266436	protein_coding	19	47150869	47164395	-	dishevelled binding antagonist of beta catenin 3
ZNF628	ENSG00000197483	-0.354375	3.81734	0.00148184	0.026629	protein_coding	19	55987699	55995854	+	zinc finger protein 628
PDCD1LG2	ENSG00000197646	0.674209	2.54001	1.40153e-05	0.000636772	protein_coding	9	5510545	5571282	+	programmed cell death 1 ligand 2
ZNF460	ENSG00000197714	0.588138	0.587014	0.00328591	0.0460474	protein_coding	19	57791419	57804937	+	zinc finger protein 460
RPS26	ENSG00000197728	-0.353278	7.1393	0.000528342	0.0126173	protein_coding	12	56435637	56438116	+	ribosomal protein S26
RPL37A	ENSG00000197756	-0.348143	8.42997	2.80874e-05	0.00113671	protein_coding	2	217362912	217443903	+	ribosomal protein L37a
ZNF780A	ENSG00000197782	0.322632	4.29964	0.00161355	0.0282235	protein_coding	19	40575059	40596845	-	zinc finger protein 780A
ZNF121	ENSG00000197961	0.268468	6.13153	0.00155593	0.027609	protein_coding	19	9671029	9695209	-	zinc finger protein 121
RPS4X	ENSG00000198034	-0.294783	9.07956	0.000363662	0.00928302	protein_coding	X	71475529	71497150	-	ribosomal protein S4 X-linked
ZNF273	ENSG00000198039	0.505566	2.45224	0.00216685	0.034859	protein_coding	7	64330550	64391344	+	zinc finger protein 273
CD2AP	ENSG00000198087	0.352751	7.30279	3.56104e-05	0.00138679	protein_coding	6	47445525	47594999	+	CD2 associated protein
CHSY3	ENSG00000198108	0.676951	1.19731	9.72019e-05	0.00321367	protein_coding	5	129240165	129522327	+	chondroitin sulfate synthase 3
TMEM229B	ENSG00000198133	1.80244	0.513618	6.95417e-14	6.83496e-12	protein_coding	14	67913801	68000456	-	transmembrane protein 229B
ZNF770	ENSG00000198146	0.32642	6.15736	0.000931421	0.0189538	protein_coding	15	35270542	35280488	-	zinc finger protein 770
MIER1	ENSG00000198160	0.246543	6.09685	0.00352064	0.0484703	protein_coding	1	67390578	67454302	+	MIER1 transcriptional regulator
RPL23A	ENSG00000198242	-0.422387	6.35776	3.01402e-06	0.000159511	protein_coding	17	27046411	27051377	+	ribosomal protein L23a
ZNF280B	ENSG00000198477	0.529575	4.4515	3.42673e-05	0.00134536	protein_coding	22	22838767	22863505	-	NA
MT-ND6	ENSG00000198695	-0.394338	9.23458	0.00189918	0.0316852	protein_coding	MT	14149	14673	-	NADH dehydrogenase, subunit 6 (complex I)
MT-CO2	ENSG00000198712	-0.411558	13.6795	0.00014781	0.00455342	protein_coding	MT	7586	8269	+	cytochrome c oxidase subunit II
DLL1	ENSG00000198719	1.2665	2.71807	1.88886e-18	2.20083e-16	protein_coding	6	170591294	170599561	-	delta like canonical Notch ligand 1
MT-CYB	ENSG00000198727	-0.452425	12.4957	4.65873e-05	0.00175285	protein_coding	MT	14747	15887	+	cytochrome b
RP5-857K21.11	ENSG00000198744	-0.921366	4.63357	4.73895e-15	4.8906e-13	pseudogene	1	569756	570302	+
RPL10A	ENSG00000198755	-0.289851	8.5546	0.000473921	0.0116251	protein_coding	6	35436185	35438562	+	ribosomal protein L10a
MT-ND2	ENSG00000198763	-0.341987	12.265	0.00136546	0.0250994	protein_coding	MT	4470	5511	+	MTND2
FAM169A	ENSG00000198780	0.29413	5.00281	0.00229669	0.0363844	protein_coding	5	74073399	74162776	-	family with sequence similarity 169 member A
MT-ND3	ENSG00000198840	-0.400375	10.8341	0.000207733	0.00603889	protein_coding	MT	10059	10404	+	NADH dehydrogenase, subunit 3 (complex I)
MT-ATP6	ENSG00000198899	-0.513771	12.7591	1.21656e-05	0.000565172	protein_coding	MT	8527	9207	+	ATP synthase F0 subunit 6
L1CAM	ENSG00000198910	-0.412412	4.93679	2.11412e-05	0.00088793	protein_coding	X	153126969	153174677	-	L1 cell adhesion molecule
KIAA0753	ENSG00000198920	0.284767	5.77293	0.00182006	0.0308279	protein_coding	17	6481468	6544247	-	KIAA0753
CCDC167	ENSG00000198937	-0.487128	3.19527	0.000225187	0.00642984	protein_coding	6	37450696	37467698	-	coiled-coil domain containing 167
MT-CO3	ENSG00000198938	-0.588209	13.7113	1.2949e-07	8.53558e-06	protein_coding	MT	9207	9990	+	cytochrome c oxidase III
INF2	ENSG00000203485	-0.250027	6.68632	0.00364936	0.0495545	protein_coding	14	105155943	105185942	+	inverted formin, FH2 and WH2 domain containing
PDCD4-AS1	ENSG00000203497	-0.675836	1.46797	0.000680278	0.0151677	antisense	10	112629626	112631991	-
PHACTR4	ENSG00000204138	0.334488	6.39074	3.97233e-05	0.00153046	protein_coding	1	28696114	28826881	+	phosphatase and actin regulator 4
ZDBF2	ENSG00000204186	0.264057	6.2326	0.00230313	0.0364121	protein_coding	2	207139387	207179148	+	zinc finger DBF-type containing 2
TAPSAR1	ENSG00000204261	2.86357	1.09973	9.62044e-32	1.52743e-29	lincRNA	6	32811863	32814272	+
PSMB8	ENSG00000204264	1.76707	5.0156	1.47484e-55	3.5514e-53	protein_coding	6	32808494	32812480	-	proteasome 20S subunit beta 8
TAP2	ENSG00000204267	1.23294	5.13786	2.75197e-31	4.27531e-29	protein_coding	6	32789610	32806557	-	transporter 2, ATP binding cassette subfamily B member
ZNF805	ENSG00000204524	0.525908	1.95575	0.000420577	0.0105519	protein_coding	19	57751973	57766503	+	zinc finger protein 805
HLA-C	ENSG00000204525	1.44277	8.45403	2.23293e-43	4.35965e-41	protein_coding	6	31236526	31239907	-	major histocompatibility complex, class I, C
PPP1R10	ENSG00000204569	-0.314283	7.21487	0.000140042	0.00435125	protein_coding	6	30568177	30586389	-	protein phosphatase 1 regulatory subunit 10
HLA-E	ENSG00000204592	1.00635	6.5267	1.346e-21	1.72097e-19	protein_coding	6	30457244	30461982	+	major histocompatibility complex, class I, E
ZNF616	ENSG00000204611	0.591823	2.5704	1.3532e-05	0.000620667	protein_coding	19	52616344	52643175	-	zinc finger protein 616
ZNRD1-AS1	ENSG00000204623	0.440605	3.85872	0.000112899	0.00364913	antisense	6	29968788	30029417	-
GNB2L1	ENSG00000204628	-0.273478	9.9222	0.000799476	0.0168872	protein_coding	5	180663909	180675096	-	receptor for activated C kinase 1
HLA-F	ENSG00000204642	2.45895	3.10813	8.90869e-52	2.01114e-49	protein_coding	6	29690552	29706305	+	major histocompatibility complex, class I, F
AKT1S1	ENSG00000204673	-0.313727	6.46534	0.000214391	0.00619505	protein_coding	19	50372295	50381716	-	AKT1 substrate 1
ZBTB10	ENSG00000205189	0.342065	5.06296	0.000285366	0.00767329	protein_coding	8	81397854	81438500	+	zinc finger and BTB domain containing 10
PSMB10	ENSG00000205220	0.794429	2.16314	2.23053e-05	0.000928722	protein_coding	16	67968405	67970990	-	proteasome 20S subunit beta 10
GPR56	ENSG00000205336	-0.579896	1.99188	0.00109369	0.0211534	protein_coding	16	57644564	57698944	+	adhesion G protein-coupled receptor G1
SAMD9	ENSG00000205413	2.76249	7.62218	1.60405e-178	1.28752e-175	protein_coding	7	92728829	92747336	-	sterile alpha motif domain containing 9
POM121B	ENSG00000205578	-0.455251	1.93677	0.00153505	0.0273675	pseudogene	7	72707497	72716496	+
C5orf51	ENSG00000205765	0.279796	7.17833	0.000788617	0.0167558	protein_coding	5	41904290	41921738	+	chromosome 5 open reading frame 51
HLA-H	ENSG00000206341	1.00707	3.44949	4.3143e-14	4.32869e-12	pseudogene	6	29855350	29858259	+
HLA-A	ENSG00000206503	0.653845	8.06084	2.32087e-06	0.000126289	protein_coding	6	29909037	29913661	+	major histocompatibility complex, class I, A
C11orf31	ENSG00000211450	-0.379372	4.07674	0.000327753	0.00856307	protein_coding	11	57508825	57510986	+	selenoprotein H
FAM127C	ENSG00000212747	-0.3326	4.05919	0.00184784	0.0310799	protein_coding	X	134154543	134156559	-	retrotransposon Gag like 8B
RPL15P3	ENSG00000212802	-0.631558	0.257179	0.00219399	0.0351362	pseudogene	6	12514342	12515006	+
RBMXL1	ENSG00000213516	0.370793	4.87251	0.000132264	0.00415425	protein_coding	1	89445139	89458643	-	RBMX like 1
RPLP0P6	ENSG00000213553	-0.490435	3.35685	6.90331e-05	0.00240637	pseudogene	2	38708920	38710012	+
C8orf82	ENSG00000213563	-0.364647	3.90717	0.0019217	0.032024	protein_coding	8	145751117	145754516	-	chromosome 8 open reading frame 82
TREX1	ENSG00000213689	0.590677	3.67627	1.37685e-06	8.02125e-05	protein_coding	3	48506445	48509044	+	three prime repair exonuclease 1
ZNF134	ENSG00000213762	0.397854	4.63226	4.45625e-05	0.00168544	protein_coding	19	58125601	58134724	+	zinc finger protein 134
IRF9	ENSG00000213928	2.15999	2.51466	5.35038e-42	1.00393e-39	protein_coding	14	24630262	24635774	+	interferon regulatory factor 9
GANC	ENSG00000214013	0.330536	4.68153	0.000987408	0.0195539	protein_coding	15	42565431	42645864	+	glucosidase alpha, neutral C
RP11-889L3.1	ENSG00000218227	-0.59325	1.1062	0.00324852	0.0455676	pseudogene	5	177482605	177483195	+
RP11-475C16.1	ENSG00000218426	-0.430088	2.41048	0.00261376	0.0394191	pseudogene	6	153603422	153603868	-
RPL23P8	ENSG00000219451	-0.741888	0.694014	6.00989e-05	0.00212821	pseudogene	7	20866945	20867372	+
RP11-40C6.2	ENSG00000219928	-0.679237	1.97132	9.52462e-06	0.000457835	pseudogene	9	90140217	90140390	+
NPTXR	ENSG00000221890	-0.384243	3.45477	0.00306056	0.0438681	protein_coding	22	39214457	39239987	-	neuronal pentraxin receptor
APOL6	ENSG00000221963	2.0223	5.60982	1.76851e-44	3.50019e-42	protein_coding	22	36044442	36064456	+	apolipoprotein L6
FADS3	ENSG00000221968	-0.378413	5.94601	1.1743e-05	0.000547299	protein_coding	11	61640991	61659523	-	fatty acid desaturase 3
UBA52	ENSG00000221983	-0.293627	8.11651	0.000327543	0.00856307	protein_coding	19	18682540	18688360	+	ubiquitin A-52 residue ribosomal protein fusion product 1
CDRT15	ENSG00000223510	1.27675	0.133219	2.23468e-08	1.61433e-06	protein_coding	17	14138990	14140179	-	CMT1A duplicated region transcript 15
AC009948.5	ENSG00000223960	0.772955	3.62908	2.05443e-10	1.69614e-08	antisense	2	179278666	179304970	+	cholesterol induced regulator of metabolism RNA
C17orf89	ENSG00000224877	-0.306804	4.61948	0.00345636	0.0478329	protein_coding	17	79213039	79215081	+	NADH:ubiquinone oxidoreductase complex assembly factor 8
MTND2P28	ENSG00000225630	-0.521849	7.09569	4.6544e-06	0.000237621	pseudogene	1	565020	566063	+
MIAT	ENSG00000225783	-0.697931	0.768092	0.000160509	0.00488283	lincRNA	22	27042392	27072438	+
RP11-288L9.4	ENSG00000225886	5.15549	1.81256	2.9997e-93	9.63105e-91	antisense	1	27995979	27996787	+
AC009950.2	ENSG00000225963	2.90707	1.62351	9.77236e-48	2.07634e-45	antisense	2	230990026	231038939	+
MTND1P23	ENSG00000225972	-0.87644	1.61074	1.60295e-08	1.16967e-06	pseudogene	1	564442	564813	+
DANCR	ENSG00000226950	-0.984585	5.86446	1.69165e-16	1.81044e-14	processed_transcript	4	53578597	53586518	+
RP11-543P15.1	ENSG00000227081	-0.444814	2.40405	0.00203166	0.0332494	pseudogene	12	3320775	3321096	-
RP11-742N3.1	ENSG00000227097	-0.481556	1.71841	0.00246667	0.0381978	pseudogene	11	82400571	82400944	+
RP11-864N7.2	ENSG00000227615	-0.511688	1.60956	0.000661438	0.0149087	pseudogene	11	74456761	74457159	-
RPL3P2	ENSG00000227939	-0.768679	0.379921	0.0015362	0.0273675	pseudogene	6	31248094	31249296	+
MT-ATP8	ENSG00000228253	-0.741784	8.10976	0.000169385	0.00510913	protein_coding	MT	8366	8572	+	ATP synthase F0 subunit 8
C19orf24	ENSG00000228300	-0.361993	4.55906	0.00067079	0.0150024	protein_coding	19	1275026	1279248	+	family with sequence similarity 174 member C
LINC01004	ENSG00000228393	-0.746964	0.325798	0.000462086	0.0113735	antisense	7	104590762	104653491	-
OST4	ENSG00000228474	-0.374568	5.16097	6.9264e-05	0.00240637	protein_coding	2	27293340	27294641	-	oligosaccharyltransferase complex subunit 4, non-catalytic
EEF1A1P11	ENSG00000228502	-0.541308	3.16399	9.93209e-06	0.000475162	pseudogene	1	96912486	96913874	+
C1orf233	ENSG00000228594	-0.472089	4.54752	1.48714e-05	0.000657071	protein_coding	1	1533392	1535476	-	fibronectin type III domain containing 10
RP5-884M6.1	ENSG00000228742	0.806884	0.752402	4.37593e-05	0.00165941	lincRNA	7	106415457	106436010	+
RP11-159C21.4	ENSG00000228929	-0.573687	1.66511	0.000187729	0.00558089	pseudogene	1	53237866	53238320	-
RPL41	ENSG00000229117	-0.262922	7.77499	0.0011656	0.0222464	protein_coding	12	56510370	56511727	+	ribosomal protein L41
CTB-63M22.1	ENSG00000229119	-0.558436	1.81851	0.00139265	0.0254373	pseudogene	5	165809310	165809604	+
RP11-561C5.4	ENSG00000229212	-0.593594	1.11711	0.000787324	0.016753	pseudogene	15	85747141	85778026	-
RP5-857K21.7	ENSG00000229344	-0.726263	4.99915	8.67216e-10	6.84674e-08	pseudogene	1	568137	568818	+
PATL2	ENSG00000229474	1.87799	0.9902	9.04452e-21	1.12651e-18	protein_coding	15	44957930	45003514	-	PAT1 homolog 2
RPL4P4	ENSG00000229638	-0.426306	3.26972	0.00109364	0.0211534	pseudogene	3	185135283	185136566	-
CISD3	ENSG00000230055	-0.321265	4.45018	0.00129926	0.0241903	protein_coding	17	36886488	36891297	+	NA
RP11-244J10.1	ENSG00000230291	-0.668002	0.453118	0.00160159	0.0280699	pseudogene	12	80496676	80497113	-
TAPBP	ENSG00000231925	0.4356	7.76373	0.00220923	0.0352754	protein_coding	6	33267471	33282164	-	TAP binding protein
RP4-530I15.9	ENSG00000232043	-0.710633	0.185737	0.000960698	0.0193048	antisense	20	49187512	49194578	-
CTD-3184A7.4	ENSG00000232442	-0.410152	2.83115	0.00111025	0.0214451	antisense	20	62258580	62260177	+
SNHG7	ENSG00000233016	-0.3153	5.24534	0.000722708	0.0156782	antisense	9	139615818	139622636	-
GPX1	ENSG00000233276	-0.247843	6.93413	0.0026933	0.0403659	protein_coding	3	49394609	49396033	-	glutathione peroxidase 1
EEF1A1P6	ENSG00000233476	-0.513431	2.49878	0.000112476	0.00364362	pseudogene	7	22550231	22551618	-
RP5-1172A22.1	ENSG00000233521	-0.512839	1.33503	0.00361921	0.0493809	lincRNA	22	27617310	27620688	-	long intergenic non-protein coding RNA 1638
AC007969.5	ENSG00000233762	-0.792044	0.846843	1.49941e-05	0.00066047	pseudogene	2	172373749	172374232	-
RPS28	ENSG00000233927	-0.584967	7.50403	3.94231e-12	3.62793e-10	protein_coding	19	8386042	8388224	+	ribosomal protein S28
RPL5P34	ENSG00000234009	-0.542263	3.02481	2.55431e-05	0.00104251	pseudogene	22	43172412	43173302	-
TRIM26	ENSG00000234127	0.395398	6.28696	2.50556e-06	0.00013358	protein_coding	6	30152232	30181204	-	tripartite motif containing 26
ZNF879	ENSG00000234284	0.459285	2.51344	0.00115985	0.0221661	protein_coding	5	178450753	178462065	+	zinc finger protein 879
HLA-B	ENSG00000234745	1.51889	8.34967	1.55551e-53	3.62484e-51	protein_coding	6	31321649	31324965	-	major histocompatibility complex, class I, B
COX10-AS1	ENSG00000236088	0.574084	3.86891	6.30729e-07	3.82889e-05	processed_transcript	17	13659795	13972812	-
RPL13AP5	ENSG00000236552	-0.577981	3.38843	5.92709e-06	0.000296314	pseudogene	10	98510045	98510675	+
BCYRN1	ENSG00000236824	-1.51536	2.78471	2.52854e-19	3.04436e-17	lincRNA	2	47558199	47571656	+	brain cytoplasmic RNA 1
MIR600HG	ENSG00000236901	-0.528648	2.58095	8.84496e-05	0.00296501	sense_intronic	9	125871773	125877756	-
ZNF295-AS1	ENSG00000237232	-0.671975	0.744833	0.00094841	0.0191645	lincRNA	21	43429303	43445060	+
PRKCQ-AS1	ENSG00000237943	0.521294	1.78386	0.00183783	0.0309584	lincRNA	10	6622381	6658414	+
hsa-mir-6723	ENSG00000237973	-0.426568	8.49631	6.79589e-05	0.00238318	pseudogene	1	566454	567996	+
AC012360.6	ENSG00000238273	-0.605507	0.756059	0.00318252	0.0450353	antisense	2	105979495	105995296	+
RP4-800G7.1	ENSG00000239719	-0.685424	0.603073	0.00048211	0.011786	pseudogene	7	148888135	148888315	-
PSMB9	ENSG00000240065	2.50172	3.93321	7.12718e-64	1.87225e-61	protein_coding	6	32811913	32827362	+	proteasome 20S subunit beta 9
RP11-745A24.1	ENSG00000240163	-0.814011	0.31397	0.00020562	0.00600161	pseudogene	15	60682570	60682881	+
RP11-48B14.1	ENSG00000240898	-0.631323	0.394337	0.00256165	0.0389587	pseudogene	17	3568514	3568996	+
TPM3P9	ENSG00000241015	0.40804	2.43966	0.00192915	0.032074	pseudogene	19	53935237	53947923	+
RPL7AP6	ENSG00000242071	-0.729719	1.1429	0.000127834	0.00404145	pseudogene	14	70352057	70352869	-
RN7SL834P	ENSG00000243650	2.30789	0.743966	9.85171e-28	1.48268e-25	misc_RNA	2	231371816	231372099	+
SCARF2	ENSG00000244486	-0.322497	5.03873	0.00194732	0.0321533	protein_coding	22	20778874	20792146	-	scavenger receptor class F member 2
WNT5A-AS1	ENSG00000244586	-0.666284	1.12651	0.000252448	0.00701417	antisense	3	55521727	55522336	+
CTD-2377D24.6	ENSG00000244649	0.80073	0.566733	0.000252055	0.00701417	lincRNA	17	46782360	46784708	+
CTB-36O1.7	ENSG00000244921	-0.57134	0.854283	0.00182309	0.030843	pseudogene	5	134258993	134259739	-
EEF1A1P4	ENSG00000245205	-0.941821	2.33744	1.40841e-10	1.17622e-08	pseudogene	12	19609178	19610582	-
SNHG6	ENSG00000245910	-0.495941	4.39549	1.91189e-06	0.000105835	processed_transcript	8	67833919	67838633	-
RP11-273G15.2	ENSG00000247317	1.8124	-0.19655	1.55435e-12	1.43957e-10	lincRNA	8	144063155	144099854	-
MTND4P12	ENSG00000247627	-0.661981	4.62408	6.65969e-07	4.02591e-05	pseudogene	5	134262350	134263726	-
MTATP6P1	ENSG00000248527	-0.572484	9.96607	3.79466e-06	0.000195108	pseudogene	1	569076	569756	+
FMN1	ENSG00000248905	0.399081	4.28703	0.000173481	0.0052001	protein_coding	15	33057747	33486897	-	formin 1
MTND5P11	ENSG00000248923	-0.44021	2.22944	0.00243943	0.0379384	pseudogene	5	134260338	134262149	-
EEF1A1P9	ENSG00000249264	-0.400695	2.83388	0.00199081	0.0326484	pseudogene	4	106405855	106407237	+
RP11-496H1.1	ENSG00000249626	0.506617	1.37238	0.00163928	0.0284822	pseudogene	3	197361186	197362682	+
NOP14-AS1	ENSG00000249673	-0.344475	4.22693	0.00099593	0.0196306	antisense	4	2936626	2963465	+
EEF1A1P13	ENSG00000250182	-0.629963	3.50711	2.32228e-07	1.48461e-05	pseudogene	5	14652047	14653438	-
RP11-757G1.6	ENSG00000250508	0.504862	2.387	0.00092228	0.0188208	lincRNA	11	68638132	68642010	+	long intergenic non-protein coding RNA 2701
RNPS1P1	ENSG00000250896	-0.641388	0.0869949	0.00309865	0.04437	pseudogene	4	11373599	11374516	+
ZNF260	ENSG00000254004	0.327269	4.47341	0.00135731	0.0249814	protein_coding	19	37001597	37019562	-	zinc finger protein 260
PABPC4L	ENSG00000254535	0.369546	3.69533	0.00118212	0.0225023	protein_coding	4	135117488	135122903	-	poly(A) binding protein cytoplasmic 4 like
RP11-326C3.7	ENSG00000254910	1.09613	0.710733	1.01694e-08	7.49627e-07	antisense	11	310139	311141	-
MIR3654	ENSG00000255508	-0.813171	0.72093	3.19357e-05	0.00126413	protein_coding	11	62327075	62359003	-
RP11-809N8.5	ENSG00000256148	-0.904128	-0.110743	0.0001534	0.0046956	pseudogene	11	73221703	73221865	+
RPL41P2	ENSG00000256338	-0.821015	1.16258	1.69789e-06	9.50817e-05	pseudogene	15	28560798	28561102	+
ZNF350	ENSG00000256683	0.409779	2.88533	0.00198497	0.0325897	protein_coding	19	52467596	52490109	-	zinc finger protein 350
RP11-800A3.7	ENSG00000257038	-0.648404	0.838174	0.00157494	0.0277497	antisense	11	73018280	73020406	-
RP11-631N16.2	ENSG00000257354	-0.886114	0.509562	0.000378659	0.0096318	antisense	12	62996532	63007855	+
LINC00641	ENSG00000258441	-0.542591	4.36815	9.84811e-07	5.85537e-05	processed_transcript	14	21668238	21675059	-
RN7SL1	ENSG00000258486	-0.501949	2.79254	0.0001221	0.00390214	antisense	14	50053297	50053596	+	NA
RP11-638I2.9	ENSG00000258521	0.65928	0.116248	0.00350911	0.0484356	antisense	14	100806169	100806891	+
CTD-2341M24.1	ENSG00000258733	0.759806	0.246042	0.000597388	0.0138097	lincRNA	14	86401054	86596117	+
RP11-26F2.1	ENSG00000259480	0.444292	1.96361	0.00231361	0.0364526	pseudogene	15	23128188	23145997	-	NA
RP11-244F12.3	ENSG00000259498	0.375746	3.96007	0.00287978	0.0421978	antisense	15	63338233	63341586	-
RP11-468E2.4	ENSG00000259529	1.70471	1.25501	7.82709e-20	9.503e-18	protein_coding	14	24620427	24636611	+
RP11-156E6.1	ENSG00000259623	0.454298	3.80301	4.35582e-05	0.00165613	sense_overlapping	17	40004770	40007699	-
RP5-991G20.4	ENSG00000259901	0.391818	2.85286	0.00203784	0.0333063	antisense	16	72823142	72825522	+	NA
TGFBR3L	ENSG00000260001	-0.553989	1.54719	0.000954137	0.0192265	protein_coding	19	7981030	7983982	+	transforming growth factor beta receptor 3 like
RP11-505K9.1	ENSG00000260018	-0.752973	0.141635	0.000461656	0.0113735	antisense	16	84150656	84151176	+
RP11-304L19.5	ENSG00000260260	-0.457173	2.9454	0.000215488	0.00620195	lincRNA	16	2204798	2205359	-
RP11-395B7.7	ENSG00000260336	0.694012	5.78871	9.08019e-12	8.19941e-10	sense_overlapping	7	100737328	100741248	+	NA
RP11-566E18.3	ENSG00000260804	-0.33386	3.58104	0.00317802	0.0450184	lincRNA	2	217081768	217084915	+
AC124789.1	ENSG00000260833	-0.354509	3.67071	0.00249752	0.0384611	processed_transcript	17	36606638	36608688	-	NA
RP1-228H13.5	ENSG00000260920	0.496763	2.39394	0.000814577	0.0171299	sense_overlapping	1	40929991	40932436	+
RP11-690D19.3	ENSG00000260966	-0.36364	3.15994	0.00368273	0.0499607	sense_overlapping	11	102921416	102926528	-
ZNF865	ENSG00000261221	-0.424493	4.3819	7.18942e-05	0.00247906	protein_coding	19	56116771	56128635	+	zinc finger protein 865
AC137932.6	ENSG00000261253	-0.782728	0.305982	0.000953769	0.0192265	antisense	16	89387541	89391518	+	uncharacterized LOC100287036
LINC00662	ENSG00000261824	0.372911	2.84213	0.00260324	0.0393427	lincRNA	19	28175488	28284848	-
CTD-2561B21.5	ENSG00000261924	-0.587312	0.910957	0.00251063	0.0384851	antisense	17	78940039	78945013	-
RP11-1055B8.6	ENSG00000263053	-0.46924	1.40907	0.00293178	0.0426247	protein_coding	17	79369275	79375658	+	NA
RP11-686D22.7	ENSG00000267102	0.526605	2.25992	0.00114928	0.0220318	pseudogene	17	33736621	33737247	-
RP1-178F10.3	ENSG00000267350	0.260036	5.44816	0.00361949	0.0493809	lincRNA	17	18227536	18229211	+	NA
MIR24-2	ENSG00000267519	-0.447527	2.86333	0.000652034	0.0147427	lincRNA	19	13945330	13947173	-
RP11-686D22.8	ENSG00000267745	0.50581	1.68456	0.00249733	0.0384611	processed_transcript	17	33733703	33736787	-
AC117395.1	ENSG00000268175	-0.65205	1.53427	0.000277191	0.00748959	protein_coding	3	149689066	149690535	+	NA
CTC-444N24.11	ENSG00000268205	0.49172	3.17163	7.3162e-05	0.00251677	lincRNA	19	57815673	57819930	+
MIR296	ENSG00000268649	-0.651737	0.172219	0.00226563	0.0360902	lincRNA	20	57392187	57392780	-
AC027307.3	ENSG00000268798	-0.728052	0.470997	0.000543297	0.0128681	protein_coding	19	1440838	1441937	+
MTRNR2L12	ENSG00000269028	-0.516588	3.38682	0.00122249	0.0230581	protein_coding	3	96335981	96337000	-	MT-RNR2 like 2
CTD-2521M24.9	ENSG00000269640	3.28667	0.695529	4.24424e-22	5.5244e-20	lincRNA	19	17516503	17529713	+	NA
RP11-145M9.4	ENSG00000269728	0.5712	3.27183	9.52519e-07	5.71037e-05	lincRNA	3	179113877	179115965	-	NA
RP11-326I11.3	ENSG00000271646	0.559332	1.57421	0.000941012	0.0190684	lincRNA	4	185395956	185398458	+
RP11-23P13.7	ENSG00000272003	0.595658	3.40304	8.06494e-07	4.85509e-05	lincRNA	15	42188137	42189031	-	NA
RP11-54O7.17	ENSG00000272512	2.02829	0.793169	1.57047e-23	2.14058e-21	lincRNA	1	931346	933431	-
RP11-398C13.6	ENSG00000272853	-0.820431	0.349059	0.00012404	0.00393874	lincRNA	10	14919687	14920685	-
LINC00938	ENSG00000273015	-0.611172	2.50648	2.48674e-05	0.0010236	lincRNA	12	46119510	46121558	-
RP3-402G11.26	ENSG00000273253	-0.883314	0.449944	3.48065e-05	0.00135915	antisense	22	50637519	50638976	-
RP11-212P7.2	ENSG00000273270	-0.449729	3.01634	0.00102596	0.0201126	lincRNA	7	128164070	128171123	-
