# Supplementary material for: Multiomic Profiling Identified EGF Receptor Signaling as a Potential Inhibitor of Type I Interferon Response in Models of Oncolytic Therapy by Vesicular Stomatitis Virus
Source: Int J Mol Sci. 2022 May 8;23(9):5244. doi: 10.3390/ijms23095244 (PMC9102229; doi:10.3390/ijms23095244)
Supplement: Supplementary file 1 [file ijms-23-05244-s001.zip › Table S2.xlsx]

## Sheet: results_DBTRG_de
Table S2. Differentially expressed genes between IFN-treated and untreated samples of DBRTG-05MG cell line. Significance threshold: FDR < 0.05
Gene	Ensemble_id	LogFC	LogCPM	PValue	FDR	Type	Chr	Start	End	Strand	Description
TSPAN6	ENSG00000000003	-0.181708	4.80209	7.06552e-05	0.000267081	protein_coding	X	99883667	99894988	-	tetraspanin 6
C1orf112	ENSG00000000460	0.457137	3.43959	2.54724e-11	2.83706e-10	protein_coding	1	169631245	169823221	+	chromosome 1 open reading frame 112
CFH	ENSG00000000971	1.21038	4.89626	1.32334e-135	1.76591e-133	protein_coding	1	196621008	196716634	+	complement factor H
FUCA2	ENSG00000001036	0.16146	6.43323	4.99321e-05	0.00019457	protein_coding	6	143815948	143832827	-	alpha-L-fucosidase 2
GCLC	ENSG00000001084	0.244193	4.65545	4.16399e-08	2.93471e-07	protein_coding	6	53362139	53481768	-	glutamate-cysteine ligase catalytic subunit
STPG1	ENSG00000001460	0.238731	2.94681	0.00169444	0.00469128	protein_coding	1	24683489	24743424	-	sperm tail PG-rich repeat containing 1
ENPP4	ENSG00000001561	0.180263	3.56465	0.0107594	0.0238733	protein_coding	6	46097730	46114436	+	ectonucleotide pyrophosphatase/phosphodiesterase 4
SEMA3F	ENSG00000001617	0.653803	0.289492	0.001438	0.00405109	protein_coding	3	50192478	50226508	+	semaphorin 3F
ANKIB1	ENSG00000001629	0.481031	7.39674	5.48226e-50	3.95645e-48	protein_coding	7	91875548	92030698	+	ankyrin repeat and IBR domain containing 1
RAD52	ENSG00000002016	0.289786	3.56923	2.27765e-05	9.58281e-05	protein_coding	12	1021243	1099219	-	RAD52 homolog, DNA repair protein
MYH16	ENSG00000002079	0.468046	0.41366	0.00421613	0.0105013	pseudogene	7	98836417	98908753	+
LAP3	ENSG00000002549	1.59736	8.00534	0	0	protein_coding	4	17578815	17609595	+	leucine aminopeptidase 3
HS3ST1	ENSG00000002587	-0.193793	5.08569	0.000430862	0.00137574	protein_coding	4	11394774	11431389	-	heparan sulfate-glucosamine 3-sulfotransferase 1
MAD1L1	ENSG00000002822	0.17435	5.17749	1.10299e-05	4.91394e-05	protein_coding	7	1855429	2272878	-	mitotic arrest deficient 1 like 1
LASP1	ENSG00000002834	0.146486	8.18103	2.66927e-06	1.35914e-05	protein_coding	17	37026112	37078023	+	LIM and SH3 protein 1
SNX11	ENSG00000002919	0.217871	4.47761	5.87246e-06	2.7772e-05	protein_coding	17	46180719	46200436	+	sorting nexin 11
M6PR	ENSG00000003056	0.139901	6.67878	0.000571269	0.00177518	protein_coding	12	9092959	9102551	-	mannose-6-phosphate receptor, cation dependent
KLHL13	ENSG00000003096	-0.366228	4.47806	7.59228e-13	1.00933e-11	protein_coding	X	117031776	117251303	-	kelch like family member 13
CYP26B1	ENSG00000003137	0.503815	3.2328	3.74587e-10	3.54654e-09	protein_coding	2	72356367	72375167	-	cytochrome P450 family 26 subfamily B member 1
ICA1	ENSG00000003147	-0.333996	1.49741	0.01171	0.0257201	protein_coding	7	8152814	8302317	-	islet cell autoantigen 1
DBNDD1	ENSG00000003249	-0.133494	5.47861	0.000514756	0.00161805	protein_coding	16	90071273	90086536	-	dysbindin domain containing 1
CASP10	ENSG00000003400	0.899548	1.13633	4.33282e-12	5.25623e-11	protein_coding	2	202047604	202094129	+	caspase 10
ARF5	ENSG00000004059	-0.399054	6.1663	6.50158e-26	2.44587e-24	protein_coding	7	127228399	127231759	+	ADP ribosylation factor 5
PLXND1	ENSG00000004399	0.362066	9.26879	9.80694e-23	3.11729e-21	protein_coding	3	129274018	129325661	-	plexin D1
FKBP4	ENSG00000004478	0.0841728	7.00052	0.019012	0.0390368	protein_coding	12	2904119	2914576	+	FKBP prolyl isomerase 4
CAMKK1	ENSG00000004660	-0.190605	3.55199	0.00475429	0.0116955	protein_coding	17	3763609	3798185	-	calcium/calmodulin dependent protein kinase kinase 1
CCDC132	ENSG00000004766	0.137647	4.9107	0.00263783	0.00695474	protein_coding	7	92861653	92988338	+	VPS50 subunit of EARP/GARPII complex
ARHGAP33	ENSG00000004777	-0.253163	4.67729	0.000228274	0.000777869	protein_coding	19	36265434	36279724	+	Rho GTPase activating protein 33
NDUFAB1	ENSG00000004779	-0.101017	5.58445	0.00787724	0.0181797	protein_coding	16	23592323	23607677	-	NADH:ubiquinone oxidoreductase subunit AB1
ZMYND10	ENSG00000004838	-0.893678	1.23495	2.1393e-11	2.40735e-10	protein_coding	3	50378541	50384283	-	zinc finger MYND-type containing 10
SLC25A13	ENSG00000004864	-0.0927242	6.04159	0.0160675	0.0338559	protein_coding	7	95749532	95951459	-	solute carrier family 25 member 13
HCCS	ENSG00000004961	0.154944	5.40818	0.000211598	0.000727707	protein_coding	X	11129421	11141198	+	holocytochrome c synthase
DVL2	ENSG00000004975	0.181562	5.68022	2.36182e-05	9.89281e-05	protein_coding	17	7128660	7137864	-	dishevelled segment polarity protein 2
UPF1	ENSG00000005007	0.450676	7.6619	7.28335e-34	3.73272e-32	protein_coding	19	18942747	18979045	+	UPF1 RNA helicase and ATPase
SKAP2	ENSG00000005020	-0.17413	6.75735	2.52514e-06	1.29413e-05	protein_coding	7	26706681	27034858	-	src kinase associated phosphoprotein 2
SLC25A5	ENSG00000005022	-0.0819594	8.00505	0.0224255	0.0451222	protein_coding	X	118602363	118605282	+	solute carrier family 25 member 5
POLR2J	ENSG00000005075	-0.190823	6.12953	2.55964e-06	1.30945e-05	protein_coding	7	102113565	102119354	-	RNA polymerase II subunit J
DHX33	ENSG00000005100	0.13089	5.66127	0.00110966	0.00322302	protein_coding	17	5344232	5372380	-	DEAH-box helicase 33
THSD7A	ENSG00000005108	-0.515948	0.888403	0.00188489	0.005157	protein_coding	7	11409984	11871824	-	thrombospondin type 1 domain containing 7A
RPAP3	ENSG00000005175	0.151504	5.39167	0.000452558	0.00144079	protein_coding	12	48057070	48099844	-	RNA polymerase II associated protein 3
AC004381.6	ENSG00000005189	0.215859	3.29002	0.00174166	0.00480981	protein_coding	16	20817751	20860987	+	RNA exonuclease 5
FAM214B	ENSG00000005238	-0.210366	5.8354	3.15001e-07	1.89684e-06	protein_coding	9	35104109	35116338	-	family with sequence similarity 214 member B
COPZ2	ENSG00000005243	-0.15871	4.21075	0.00217019	0.00584601	protein_coding	17	46103533	46115392	-	coatomer protein complex subunit zeta 2
PRKAR2B	ENSG00000005249	-0.170217	5.1973	0.00103293	0.00302313	protein_coding	7	106685094	106802256	+	protein kinase cAMP-dependent type II regulatory subunit beta
CREBBP	ENSG00000005339	0.127508	6.6159	0.000132716	0.000475738	protein_coding	16	3775055	3930727	-	CREB binding protein
ABCB4	ENSG00000005471	-0.31501	5.37762	1.77375e-14	2.78465e-13	protein_coding	7	87031013	87109751	-	ATP binding cassette subfamily B member 4
KMT2E	ENSG00000005483	0.1646	6.52567	1.03246e-05	4.62155e-05	protein_coding	7	104654626	104754808	+	lysine methyltransferase 2E
RHBDD2	ENSG00000005486	-0.188694	6.93469	4.44795e-07	2.60415e-06	protein_coding	7	75471920	75518244	+	rhomboid domain containing 2
MYCBP2	ENSG00000005810	0.151006	6.03274	8.45941e-05	0.000314394	protein_coding	13	77618792	77901185	-	MYC binding protein 2
FBXL3	ENSG00000005812	-0.112731	5.39075	0.00476761	0.0117161	protein_coding	13	77566740	77601330	-	F-box and leucine rich repeat protein 3
PDK2	ENSG00000005882	-0.378853	3.54529	5.27221e-08	3.64494e-07	protein_coding	17	48172101	48189516	+	pyruvate dehydrogenase kinase 2
ITGA3	ENSG00000005884	0.290029	11.7032	9.91076e-14	1.43488e-12	protein_coding	17	48133332	48167845	+	integrin subunit alpha 3
LAMP2	ENSG00000005893	-0.145229	7.9066	5.88895e-06	2.78406e-05	protein_coding	X	119561682	119603220	-	lysosomal associated membrane protein 2
MAP3K14	ENSG00000006062	-0.43806	4.61276	1.48047e-11	1.69017e-10	processed_transcript	17	43340488	43394414	-	mitogen-activated protein kinase kinase kinase 14
SYNRG	ENSG00000006114	0.263623	6.30211	4.20768e-14	6.37232e-13	protein_coding	17	35874900	35969544	-	NA
TMEM132A	ENSG00000006118	0.318192	7.98765	5.93807e-16	1.08942e-14	protein_coding	11	60691935	60704631	+	transmembrane protein 132A
CX3CL1	ENSG00000006210	0.411945	6.03703	2.76983e-27	1.09746e-25	protein_coding	16	57406370	57418960	+	C-X3-C motif chemokine ligand 1
SPATA20	ENSG00000006282	-0.371556	6.79346	1.05208e-17	2.26166e-16	protein_coding	17	48620419	48633213	+	spermatogenesis associated 20
BAIAP2L1	ENSG00000006453	0.113658	5.74732	0.00245921	0.00653985	protein_coding	7	97920963	98030380	-	BAR/IMD domain containing adaptor protein 2 like 1
ALDH3B1	ENSG00000006534	-0.285657	5.33215	2.03401e-09	1.74054e-08	protein_coding	11	67776048	67796744	+	aldehyde dehydrogenase 3 family member B1
PHTF2	ENSG00000006576	0.102066	6.37586	0.0074038	0.0172475	protein_coding	7	77428122	77586818	+	putative homeodomain transcription factor 2
GGCT	ENSG00000006625	0.128623	5.37828	0.00583143	0.0139546	protein_coding	7	30536237	30591095	-	gamma-glutamylcyclotransferase
DBF4	ENSG00000006634	0.14691	5.98289	0.000536605	0.00167927	protein_coding	7	87505531	87538856	+	DBF4 zinc finger
TBXA2R	ENSG00000006638	0.399758	2.3332	1.07301e-05	4.79551e-05	protein_coding	19	3594504	3606838	-	thromboxane A2 receptor
GTF2IRD1	ENSG00000006704	0.107638	5.80071	0.0153074	0.032438	protein_coding	7	73868120	74016931	+	GTF2I repeat domain containing 1
VPS41	ENSG00000006715	-0.226373	6.21365	1.30039e-06	7.0475e-06	protein_coding	7	38762563	38971994	-	VPS41 subunit of HOPS complex
ARSD	ENSG00000006756	-0.168264	4.83647	0.00176459	0.00486267	protein_coding	X	2822011	2847392	-	arylsulfatase D
PNPLA4	ENSG00000006757	-0.39136	3.51186	1.3229e-07	8.52503e-07	protein_coding	X	7866288	7895780	-	patatin like phospholipase domain containing 4
ADIPOR2	ENSG00000006831	0.22046	6.64972	1.31377e-10	1.32359e-09	protein_coding	12	1797740	1897844	+	adiponectin receptor 2
PROM1	ENSG00000007062	-0.784412	3.25894	2.54096e-14	3.94533e-13	protein_coding	4	15964699	16086001	-	prominin 1
CCDC124	ENSG00000007080	-0.16393	6.10547	1.34392e-05	5.88721e-05	protein_coding	19	18043825	18054800	+	coiled-coil domain containing 124
KIAA0100	ENSG00000007202	-0.106651	7.59277	0.00112793	0.00327071	protein_coding	17	26941458	26972472	-	KIAA0100
TRAPPC6A	ENSG00000007255	-0.848849	1.07095	1.17337e-08	9.01048e-08	protein_coding	19	45666186	45681495	-	trafficking protein particle complex 6A
ST7L	ENSG00000007341	0.208804	3.92591	0.00151278	0.00424148	protein_coding	1	113066140	113163447	-	suppression of tumorigenicity 7 like
BAIAP3	ENSG00000007516	-0.420047	2.44266	3.02682e-06	1.51878e-05	protein_coding	16	1383602	1399439	+	BAI1 associated protein 3
TSR3	ENSG00000007520	-0.182753	5.31374	8.85023e-06	4.02141e-05	protein_coding	16	1399241	1401912	-	TSR3 ribosome maturation factor
CRAMP1L	ENSG00000007545	0.138965	3.85924	0.0198879	0.0406289	protein_coding	16	1662326	1727909	+	cramped chromatin regulator homolog 1
DNAJC11	ENSG00000007923	0.120635	5.71716	0.00162486	0.004519	protein_coding	1	6694228	6761984	-	DnaJ heat shock protein family (Hsp40) member C11
JARID2	ENSG00000008083	-0.395923	4.10928	2.1428e-09	1.82151e-08	protein_coding	6	15246527	15522252	+	jumonji and AT-rich interaction domain containing 2
CDKL5	ENSG00000008086	-0.308931	1.60248	0.0066155	0.0155908	protein_coding	X	18443703	18671749	+	cyclin dependent kinase like 5
CAMK1G	ENSG00000008118	-0.303159	3.40645	4.90525e-06	2.36292e-05	protein_coding	1	209757062	209787283	+	calcium/calmodulin dependent protein kinase IG
NADK	ENSG00000008130	0.161883	6.53441	1.26446e-05	5.57362e-05	protein_coding	1	1682671	1711896	-	NAD kinase
CYTH3	ENSG00000008256	0.0974314	6.47694	0.0087552	0.0199167	protein_coding	7	6201407	6312275	-	cytohesin 3
ADAM22	ENSG00000008277	-0.264134	3.88406	2.00287e-05	8.51536e-05	protein_coding	7	87563458	87832204	+	ADAM metallopeptidase domain 22
SYPL1	ENSG00000008282	0.170944	7.49761	8.49312e-07	4.74655e-06	protein_coding	7	105730949	105753022	-	synaptophysin like 1
CYB561	ENSG00000008283	0.186681	5.92481	7.57707e-07	4.27173e-06	protein_coding	17	61509665	61523739	-	cytochrome b561
SPAG9	ENSG00000008294	-0.149651	7.06935	3.96416e-05	0.000157908	protein_coding	17	49039535	49198226	-	sperm associated antigen 9
PLEKHG6	ENSG00000008323	0.405533	1.33019	0.000649614	0.00199409	protein_coding	12	6419602	6437672	+	pleckstrin homology and RhoGEF domain containing G6
SS18L2	ENSG00000008324	0.276638	3.37365	1.14836e-05	5.10321e-05	protein_coding	3	42623332	42636606	+	SS18 like 2
MPND	ENSG00000008382	-0.266532	2.14229	0.0129886	0.028118	protein_coding	19	4343524	4360083	+	MPN domain containing
ST3GAL1	ENSG00000008513	-0.130542	6.6476	0.000248524	0.000838789	protein_coding	8	134467091	134584183	-	ST3 beta-galactoside alpha-2,3-sialyltransferase 1
IL32	ENSG00000008517	0.719268	1.51817	2.62747e-09	2.20961e-08	protein_coding	16	3115298	3131908	+	interleukin 32
PKD1	ENSG00000008710	0.365548	6.99696	3.53617e-20	9.38445e-19	protein_coding	16	2138711	2185899	-	polycystin 1, transient receptor potential channel interacting
MAPK8IP2	ENSG00000008735	0.598801	1.75019	1.40985e-07	9.04226e-07	protein_coding	22	51039114	51052409	+	mitogen-activated protein kinase 8 interacting protein 2
RHOBTB2	ENSG00000008853	0.23954	4.53317	2.28727e-07	1.40851e-06	protein_coding	8	22844930	22877712	+	Rho related BTB domain containing 2
RPS20	ENSG00000008988	-0.27596	8.3461	9.33931e-12	1.09813e-10	protein_coding	8	56979854	56987069	-	ribosomal protein S20
CSDE1	ENSG00000009307	-0.165466	8.5917	2.81216e-06	1.42504e-05	protein_coding	1	115259534	115301297	-	cold shock domain containing E1
REV3L	ENSG00000009413	0.169723	5.59696	1.00421e-05	4.50936e-05	protein_coding	6	111620234	111804918	-	REV3 like, DNA directed polymerase zeta catalytic subunit
PAX7	ENSG00000009709	-0.462011	2.71119	2.76257e-08	1.99982e-07	protein_coding	1	18957500	19075360	+	paired box 7
MASP2	ENSG00000009724	-0.281152	2.33354	0.00729114	0.0170271	protein_coding	1	11086580	11107290	-	mannan binding lectin serine peptidase 2
POMT2	ENSG00000009830	-0.179285	5.21148	9.04516e-05	0.000334406	protein_coding	14	77741299	77787227	-	protein O-mannosyltransferase 2
BAZ1B	ENSG00000009954	0.290931	8.39531	3.57136e-17	7.3855e-16	protein_coding	7	72854728	72936608	-	bromodomain adjacent to zinc finger domain 1B
RANBP9	ENSG00000010017	0.116888	6.02165	0.000692149	0.00210865	protein_coding	6	13621730	13711796	-	RAN binding protein 9
ETV7	ENSG00000010030	2.74887	2.11974	2.08721e-126	2.70859e-124	protein_coding	6	36322419	36356164	-	ETS variant transcription factor 7
DYRK4	ENSG00000010219	-0.143738	3.6969	0.0162148	0.0341054	protein_coding	12	4671370	4723325	+	dual specificity tyrosine phosphorylation regulated kinase 4
UQCRC1	ENSG00000010256	-0.186611	7.7265	9.26474e-08	6.11239e-07	protein_coding	3	48636435	48648409	-	ubiquinol-cytochrome c reductase core protein 1
STARD3NL	ENSG00000010270	-0.109385	6.53484	0.00148138	0.004165	protein_coding	7	38217824	38270272	+	STARD3 N-terminal like
GIPR	ENSG00000010310	-0.47722	1.55085	1.49647e-05	6.5051e-05	protein_coding	19	46171502	46186982	+	gastric inhibitory polypeptide receptor
PHF7	ENSG00000010318	-0.215038	2.68837	0.00961056	0.021626	protein_coding	3	52444673	52457657	+	PHD finger protein 7
NISCH	ENSG00000010322	-0.0892026	6.48319	0.0103066	0.0229969	protein_coding	3	52489134	52527087	+	nischarin
IDS	ENSG00000010404	-0.282238	7.99905	2.24075e-11	2.50755e-10	protein_coding	X	148558521	148615470	-	iduronate 2-sulfatase
LRRC23	ENSG00000010626	-0.486138	1.82884	2.0124e-06	1.05005e-05	protein_coding	12	6982733	7023407	+	leucine rich repeat containing 23
HFE	ENSG00000010704	0.316508	4.91036	8.42493e-11	8.73685e-10	protein_coding	6	26087509	26098571	+	homeostatic iron regulator
FYN	ENSG00000010810	-0.332346	6.40281	4.63027e-13	6.30975e-12	protein_coding	6	111981535	112194655	-	FYN proto-oncogene, Src family tyrosine kinase
TCEB3	ENSG00000011007	0.246655	6.12632	5.95161e-11	6.2919e-10	protein_coding	1	24069645	24088549	+	elongin A
LYPLA2	ENSG00000011009	-0.139906	5.9121	0.000115941	0.000419432	protein_coding	1	24117460	24122029	+	lysophospholipase 2
CLCN6	ENSG00000011021	-0.190538	4.59344	9.26375e-05	0.000341595	protein_coding	1	11866207	11903201	+	chloride voltage-gated channel 6
MRC2	ENSG00000011028	-0.107688	8.82749	0.00906216	0.0205489	protein_coding	17	60704762	60770958	+	mannose receptor C type 2
BTBD7	ENSG00000011114	-0.244191	4.69423	4.35927e-08	3.06014e-07	protein_coding	14	93703896	93799438	-	BTB domain containing 7
KAL1	ENSG00000011201	-1.25998	2.97967	4.11212e-26	1.55941e-24	protein_coding	X	8496915	8700227	-	anosmin 1
AKAP8L	ENSG00000011243	-0.177582	5.39578	8.73922e-05	0.000324027	protein_coding	19	15490859	15529952	-	A-kinase anchoring protein 8 like
RNF216	ENSG00000011275	0.160345	7.03506	2.16743e-06	1.12219e-05	protein_coding	7	5659678	5821370	-	ring finger protein 216
DPF1	ENSG00000011332	0.421642	3.4227	1.60742e-08	1.20365e-07	protein_coding	19	38701646	38720354	-	double PHD fingers 1
LARS2	ENSG00000011376	0.292561	5.49546	4.11587e-12	5.01961e-11	protein_coding	3	45429998	45590913	+	leucyl-tRNA synthetase 2, mitochondrial
PIK3C2A	ENSG00000011405	-0.106875	6.62932	0.00558732	0.0134341	protein_coding	11	17099277	17229530	-	phosphatidylinositol-4-phosphate 3-kinase catalytic subunit type 2 alpha
PLAUR	ENSG00000011422	0.342712	6.22316	1.15572e-15	2.04091e-14	protein_coding	19	44150247	44174699	-	plasminogen activator, urokinase receptor
ANLN	ENSG00000011426	0.164263	9.20817	0.000548425	0.00171247	protein_coding	7	36429415	36493400	+	anillin actin binding protein
PPP5C	ENSG00000011485	0.195266	5.99674	1.17283e-05	5.20217e-05	protein_coding	19	46850251	46896238	+	protein phosphatase 5 catalytic subunit
CEP68	ENSG00000011523	-0.177509	3.67169	0.0108196	0.0239805	protein_coding	2	65283500	65314138	+	centrosomal protein 68
TMEM159	ENSG00000011638	-0.196737	3.29154	0.00549269	0.0132426	protein_coding	16	21169698	21191937	+	transmembrane protein 159
BRCA1	ENSG00000012048	0.49963	6.02184	2.65879e-32	1.2792e-30	protein_coding	17	41196312	41277500	-	BRCA1 DNA repair associated
SEMA3B	ENSG00000012171	-0.463365	2.28609	1.75104e-05	7.52153e-05	processed_transcript	3	50304990	50314977	+	semaphorin 3B
PRICKLE3	ENSG00000012211	0.501685	3.07051	5.20669e-12	6.28401e-11	protein_coding	X	49031151	49042845	-	prickle planar cell polarity protein 3
CALCOCO1	ENSG00000012822	-0.447487	5.45249	7.66883e-11	7.98202e-10	protein_coding	12	54104903	54121529	-	calcium binding and coiled-coil domain 1
UBR7	ENSG00000012963	0.291014	5.62006	4.59173e-11	4.92793e-10	protein_coding	14	93673401	93695561	+	ubiquitin protein ligase E3 component n-recognin 7 (putative)
PSMC4	ENSG00000013275	0.12926	7.01398	0.000148386	0.000527766	protein_coding	19	40476912	40487348	+	proteasome 26S subunit, ATPase 4
MAN2B2	ENSG00000013288	0.102103	6.70345	0.00645309	0.0152564	protein_coding	4	6576902	6625089	+	mannosidase alpha class 2B member 2
SLC25A39	ENSG00000013306	-0.344571	7.03373	1.66392e-18	3.82701e-17	protein_coding	17	42396993	42402238	-	solute carrier family 25 member 39
MVP	ENSG00000013364	0.19195	7.47046	6.42183e-08	4.36894e-07	protein_coding	16	29831715	29859355	+	major vault protein
NUB1	ENSG00000013374	0.312774	6.31254	3.14903e-19	7.76011e-18	protein_coding	7	151038785	151075535	+	negative regulator of ubiquitin like proteins 1
RWDD2A	ENSG00000013392	-0.288258	3.55274	1.06086e-06	5.82976e-06	protein_coding	6	83903098	83908651	+	RWD domain containing 2A
CLK1	ENSG00000013441	-0.489652	5.70159	7.68073e-30	3.35321e-28	protein_coding	2	201717732	201729422	-	CDC like kinase 1
DDX11	ENSG00000013573	0.268733	6.1518	1.16569e-10	1.18283e-09	protein_coding	12	31226779	31257725	+	DEAD/H-box helicase 11
GPRC5A	ENSG00000013588	0.45455	6.76995	1.1759e-21	3.48701e-20	protein_coding	12	13043716	13070871	+	G protein-coupled receptor class C group 5 member A
MAMLD1	ENSG00000013619	0.114773	6.77938	0.0133272	0.0287762	protein_coding	X	149529689	149682448	+	mastermind like domain containing 1
TACC3	ENSG00000013810	0.141523	7.82866	0.00113673	0.00329355	protein_coding	4	1723227	1746898	+	transforming acidic coiled-coil containing protein 3
POLA2	ENSG00000014138	0.45522	6.16862	2.8242e-25	1.0217e-23	protein_coding	11	65029233	65073060	+	DNA polymerase alpha 2, accessory subunit
ZC3H3	ENSG00000014164	0.200658	4.66992	0.000201183	0.000695099	protein_coding	8	144519825	144623623	-	zinc finger CCCH-type containing 3
MDH1	ENSG00000014641	-0.0917513	7.22806	0.00767374	0.0177884	protein_coding	2	63815743	63834331	+	malate dehydrogenase 1
SLC30A9	ENSG00000014824	-0.135729	6.87188	0.000572755	0.00177901	protein_coding	4	41992489	42092474	+	solute carrier family 30 member 9
MTMR11	ENSG00000014914	0.126669	5.48474	0.00481408	0.0118221	protein_coding	1	149900543	149908791	-	myotubularin related protein 11
ZMYND11	ENSG00000015171	-0.211097	5.73126	4.84231e-08	3.37744e-07	protein_coding	10	180405	300577	+	zinc finger MYND-type containing 11
MATR3	ENSG00000015479	0.0875521	8.55916	0.00826291	0.0189523	protein_coding	5	138609441	138667360	+	matrin 3
XYLT2	ENSG00000015532	0.150767	5.98375	0.000139523	0.000497868	protein_coding	17	48423453	48440499	+	xylosyltransferase 2
NUDCD3	ENSG00000015676	0.105425	7.22741	0.00179338	0.00493144	protein_coding	7	44418720	44530479	-	NudC domain containing 3
ATP2C1	ENSG00000017260	0.140451	7.28675	2.63333e-05	0.000108913	protein_coding	3	130569439	130735556	+	ATPase secretory pathway Ca2+ transporting 1
CNTN1	ENSG00000018236	-0.534213	5.78719	8.3377e-45	5.56305e-43	protein_coding	12	41086244	41466220	+	contactin 1
AGPS	ENSG00000018510	-0.110363	7.6415	0.00305344	0.00791186	protein_coding	2	178257372	178408564	+	alkylglycerone phosphate synthase
SNAI2	ENSG00000019549	-0.747285	2.90735	1.48344e-20	4.00445e-19	protein_coding	8	49830249	49834299	-	snail family transcriptional repressor 2
CD74	ENSG00000019582	1.79064	0.0599577	1.79798e-18	4.12864e-17	protein_coding	5	149781200	149792492	-	CD74 molecule
SAMD4A	ENSG00000020577	-0.390827	3.82409	5.42929e-10	5.01943e-09	protein_coding	14	55033815	55260033	+	sterile alpha motif domain containing 4A
MRE11A	ENSG00000020922	0.294568	3.40176	1.03577e-05	4.63347e-05	protein_coding	11	94152895	94227074	-	MRE11 homolog, double strand break repair nuclease
PLEKHB1	ENSG00000021300	-0.701599	4.55571	8.01657e-15	1.30639e-13	protein_coding	11	73357223	73373864	+	pleckstrin homology domain containing B1
SERPINB1	ENSG00000021355	0.128067	4.82111	0.00715966	0.0167755	protein_coding	6	2832566	2842240	-	serpin family B member 1
NRXN3	ENSG00000021645	-0.428511	5.87936	4.64018e-16	8.67045e-15	protein_coding	14	78708734	80330762	+	neurexin 3
CPS1	ENSG00000021826	-0.169349	3.50581	0.00843173	0.019277	protein_coding	2	211342406	211543831	+	carbamoyl-phosphate synthase 1
RTFDC1	ENSG00000022277	-0.152429	5.72526	2.25451e-05	9.48824e-05	protein_coding	20	55043647	55093943	+	replication termination factor 2
SLC45A4	ENSG00000022567	0.406139	4.08559	3.20964e-11	3.51669e-10	protein_coding	8	142217265	142318404	-	solute carrier family 45 member 4
RNF10	ENSG00000022840	-0.0871329	7.35588	0.016688	0.034888	protein_coding	12	120971283	121015397	+	ring finger protein 10
ZDHHC6	ENSG00000023041	0.162494	5.6181	0.000487794	0.00154324	protein_coding	10	114190058	114206672	-	zinc finger DHHC-type containing 6
GRAMD1B	ENSG00000023171	0.253929	3.97404	1.61455e-06	8.56313e-06	protein_coding	11	123396344	123498482	+	GRAM domain containing 1B
NDUFS1	ENSG00000023228	-0.114611	7.10486	0.000499476	0.00157492	protein_coding	2	206979541	207024327	-	NADH:ubiquinone oxidoreductase core subunit S1
RB1CC1	ENSG00000023287	-0.101341	6.10289	0.00799189	0.0184083	protein_coding	8	53535016	53658403	-	RB1 inducible coiled-coil 1
ERP44	ENSG00000023318	0.233603	6.81971	6.55487e-10	6.02069e-09	protein_coding	9	102741461	102861322	-	endoplasmic reticulum protein 44
ALAS1	ENSG00000023330	0.152401	5.91426	3.51427e-05	0.00014126	protein_coding	3	52232102	52248343	+	5'-aminolevulinate synthase 1
BIRC3	ENSG00000023445	0.840475	2.5614	5.10436e-15	8.49426e-14	protein_coding	11	102188215	102210134	+	baculoviral IAP repeat containing 3
DERA	ENSG00000023697	-0.211796	4.72123	7.35617e-06	3.38825e-05	protein_coding	12	16064106	16190220	+	deoxyribose-phosphate aldolase
STRAP	ENSG00000023734	-0.237627	7.40644	2.79005e-11	3.08563e-10	protein_coding	12	16035325	16056412	+	serine/threonine kinase receptor associated protein
GCLM	ENSG00000023909	0.275758	6.41299	3.11034e-14	4.76145e-13	protein_coding	1	94350761	94374966	-	glutamate-cysteine ligase modifier subunit
UBR2	ENSG00000024048	0.224528	5.57202	1.41633e-08	1.07134e-07	protein_coding	6	42531800	42661242	+	ubiquitin protein ligase E3 component n-recognin 2
CCDC28A	ENSG00000024862	-0.229519	3.2983	0.0038967	0.00980936	protein_coding	6	139094657	139114456	+	coiled-coil domain containing 28A
PHF20	ENSG00000025293	-0.080075	5.94523	0.0248581	0.0494401	protein_coding	20	34359896	34538303	+	PHD finger protein 20
TYMP	ENSG00000025708	1.28159	0.144914	7.79998e-12	9.2327e-11	protein_coding	22	50964181	50968485	-	thymidine phosphorylase
NCAPH2	ENSG00000025770	0.298218	5.91591	1.70941e-12	2.18623e-11	protein_coding	22	50946645	50961901	+	non-SMC condensin II complex subunit H2
TOMM34	ENSG00000025772	-0.125014	6.85996	0.000846659	0.00252978	protein_coding	20	43570771	43589127	-	translocase of outer mitochondrial membrane 34
KPNA6	ENSG00000025800	0.141461	5.95834	0.000110273	0.00040067	protein_coding	1	32573639	32642169	+	karyopherin subunit alpha 6
RTEL1-TNFRSF6B	ENSG00000026036	-0.450409	1.82086	0.000870855	0.00259361	protein_coding	20	62290653	62330037	+
FAS	ENSG00000026103	0.357324	5.60841	1.35682e-18	3.16182e-17	protein_coding	10	90750414	90775542	+	Fas cell surface death receptor
BTN3A1	ENSG00000026950	0.965403	5.69626	1.68405e-107	2.01872e-105	protein_coding	6	26402465	26415444	+	butyrophilin subfamily 3 member A1
TNFRSF1B	ENSG00000028137	0.892989	1.98089	5.80949e-20	1.52176e-18	protein_coding	1	12227060	12269285	+	TNF receptor superfamily member 1B
POU2F2	ENSG00000028277	0.582674	0.0552231	0.00159865	0.00445663	protein_coding	19	42590263	42700737	-	POU class 2 homeobox 2
SNX1	ENSG00000028528	-0.0808573	6.97408	0.0169165	0.0353031	protein_coding	15	64386322	64438289	+	sorting nexin 1
ARNTL2	ENSG00000029153	0.350167	4.71092	5.62542e-11	5.96936e-10	protein_coding	12	27485787	27576241	+	aryl hydrocarbon receptor nuclear translocator like 2
BCLAF1	ENSG00000029363	0.0899554	7.75501	0.0147246	0.0313297	protein_coding	6	136578001	136610989	-	BCL2 associated transcription factor 1
ANK1	ENSG00000029534	0.0962585	7.14511	0.00552483	0.0133065	protein_coding	8	41510739	41754280	-	ankyrin 1
HMGB3	ENSG00000029993	-0.249376	6.16083	1.20398e-09	1.06174e-08	protein_coding	X	150148982	150159248	+	high mobility group box 3
NUP160	ENSG00000030066	0.293908	6.26035	2.83316e-13	3.92508e-12	protein_coding	11	47799639	47870107	-	nucleoporin 160
BAK1	ENSG00000030110	0.282804	4.90348	6.54199e-09	5.21332e-08	protein_coding	6	33540329	33548019	-	BCL2 antagonist/killer 1
IKZF2	ENSG00000030419	0.36241	3.00608	6.90343e-05	0.000261443	protein_coding	2	213864429	214017151	-	IKAROS family zinc finger 2
ARHGAP31	ENSG00000031081	0.1081	5.36636	0.0212812	0.0431142	protein_coding	3	119013220	119139561	+	Rho GTPase activating protein 31
CENPQ	ENSG00000031691	0.448636	3.68063	2.12326e-13	2.97951e-12	protein_coding	6	49431091	49460820	+	centromere protein Q
RANBP3	ENSG00000031823	0.151468	6.64816	0.000114424	0.000414581	protein_coding	19	5916150	5978153	-	RAN binding protein 3
ARID4A	ENSG00000032219	0.240206	3.81507	4.64893e-05	0.000182614	protein_coding	14	58765103	58840605	+	AT-rich interaction domain 4A
PNPLA6	ENSG00000032444	-0.140794	6.99325	0.000409992	0.00131415	protein_coding	19	7598890	7626650	+	patatin like phospholipase domain containing 6
ALG1	ENSG00000033011	0.134401	4.68149	0.00449692	0.011138	protein_coding	16	5083703	5137380	+	ALG1 chitobiosyldiphosphodolichol beta-mannosyltransferase
ZCCHC8	ENSG00000033030	0.230081	5.57825	7.37048e-08	4.94102e-07	protein_coding	12	122957417	122985518	-	zinc finger CCHC-type containing 8
UBA6	ENSG00000033178	0.292263	6.21622	9.30534e-16	1.66402e-14	protein_coding	4	68478370	68566897	-	ubiquitin like modifier activating enzyme 6
GAB2	ENSG00000033327	-0.190055	4.17273	0.000610092	0.00188587	protein_coding	11	77926343	78129394	-	GRB2 associated binding protein 2
ATP6V0A1	ENSG00000033627	0.123999	5.3811	0.00196473	0.00535577	protein_coding	17	40610862	40674629	+	ATPase H+ transporting V0 subunit a1
PIAS1	ENSG00000033800	0.239038	5.00023	4.46274e-07	2.61126e-06	protein_coding	15	68346517	68483096	+	protein inhibitor of activated STAT 1
SLC4A7	ENSG00000033867	-0.203946	6.77063	5.16374e-08	3.57694e-07	protein_coding	3	27414214	27525911	-	solute carrier family 4 member 7
APBA2	ENSG00000034053	-0.192081	4.19833	0.000207323	0.00071422	protein_coding	15	29129629	29410518	+	amyloid beta precursor protein binding family A member 2
UHRF1	ENSG00000034063	0.137539	6.4043	0.00163489	0.00454419	processed_transcript	19	4903092	4962165	+	NA
GABARAPL2	ENSG00000034713	-0.166498	5.93001	7.1483e-05	0.000269778	protein_coding	16	75600249	75611779	+	GABA type A receptor associated protein like 2
SH3YL1	ENSG00000035115	-0.256044	4.12437	8.11731e-06	3.71343e-05	protein_coding	2	217730	266398	-	SH3 and SYLF domain containing 1
VCL	ENSG00000035403	-0.103729	9.11059	0.00322505	0.00829123	protein_coding	10	75757872	75879918	+	vinculin
DAPK2	ENSG00000035664	0.505778	0.993815	0.000226761	0.000773458	protein_coding	15	64199235	64364232	-	death associated protein kinase 2
NSMAF	ENSG00000035681	-0.106142	5.43427	0.00457014	0.0113035	protein_coding	8	59496063	59572403	-	neutral sphingomyelinase activation associated factor
RFC1	ENSG00000035928	0.164695	6.55457	8.30724e-05	0.000309226	protein_coding	4	39289076	39367995	-	replication factor C subunit 1
SLC18A1	ENSG00000036565	-1.04818	1.42751	2.05547e-17	4.32657e-16	protein_coding	8	20002366	20040717	-	solute carrier family 18 member A1
RPL26L1	ENSG00000037241	-0.192807	5.02296	3.57912e-05	0.000143744	protein_coding	5	172385732	172396774	+	ribosomal protein L26 like 1
FBXO42	ENSG00000037637	0.210566	5.1682	1.35837e-05	5.94495e-05	protein_coding	1	16573334	16678949	-	F-box protein 42
PI4K2B	ENSG00000038210	0.227852	6.02138	1.13839e-08	8.77045e-08	protein_coding	4	25162263	25280714	+	phosphatidylinositol 4-kinase type 2 beta
MAT2B	ENSG00000038274	0.116398	6.25143	0.00281861	0.00736627	protein_coding	5	162930120	162946342	+	methionine adenosyltransferase 2B
TLL1	ENSG00000038295	-0.148994	4.14763	0.0137651	0.0295862	protein_coding	4	166794410	167025047	+	tolloid like 1
EDC4	ENSG00000038358	0.136232	5.97423	0.000460949	0.00146454	protein_coding	16	67906926	67918406	+	enhancer of mRNA decapping 4
VCAN	ENSG00000038427	-0.234627	9.11449	1.15074e-09	1.01796e-08	protein_coding	5	82767284	82878122	+	versican
SKIV2L2	ENSG00000039123	0.170497	6.16136	6.31272e-06	2.96066e-05	protein_coding	5	54603588	54721409	+	Mtr4 exosome RNA helicase
DNAH5	ENSG00000039139	-0.530564	0.763846	0.00189038	0.00517004	protein_coding	5	13690440	13944652	-	dynein axonemal heavy chain 5
ZFYVE16	ENSG00000039319	0.174036	6.46425	7.37556e-06	3.39607e-05	protein_coding	5	79703832	79775169	+	zinc finger FYVE-type containing 16
FAM65A	ENSG00000039523	0.094268	5.90586	0.00832218	0.0190675	protein_coding	16	67552321	67580691	+	RHO family interacting cell polarization regulator 1
RAI14	ENSG00000039560	-0.15669	7.38725	2.05479e-05	8.71254e-05	protein_coding	5	34656342	34832732	+	retinoic acid induced 14
SPDL1	ENSG00000040275	0.126489	7.49763	0.000979659	0.00288118	protein_coding	5	169010638	169031782	+	spindle apparatus coiled-coil protein 1
STAU2	ENSG00000040341	-0.224109	5.53415	3.67211e-07	2.18887e-06	protein_coding	8	74332604	74659943	-	staufen double-stranded RNA binding protein 2
PQLC2	ENSG00000040487	0.279265	5.4621	2.61033e-11	2.90049e-10	protein_coding	1	19638820	19655794	+	solute carrier family 66 member 1
PHF23	ENSG00000040633	0.0871671	5.81921	0.0136439	0.0293659	protein_coding	17	7138347	7143041	-	PHD finger protein 23
INPP4A	ENSG00000040933	0.130258	5.15486	0.00109856	0.00319538	protein_coding	2	99061317	99210853	+	inositol polyphosphate-4-phosphatase type I A
RAB27B	ENSG00000041353	0.385271	5.75395	7.80803e-15	1.27534e-13	protein_coding	18	52385091	52562747	+	RAB27B, member RAS oncogene family
LSG1	ENSG00000041802	0.138543	5.74499	0.000496362	0.00156685	protein_coding	3	194361517	194393206	-	large 60S subunit nuclear export GTPase 1
AIFM2	ENSG00000042286	0.266659	6.34982	1.85199e-13	2.61702e-12	protein_coding	10	71857979	71892690	-	apoptosis inducing factor mitochondria associated 2
MED17	ENSG00000042429	0.214002	4.49311	5.84133e-06	2.76542e-05	protein_coding	11	93517393	93547861	+	mediator complex subunit 17
RETSAT	ENSG00000042445	-0.171722	5.7425	9.06632e-06	4.11167e-05	protein_coding	2	85569211	85581743	-	retinol saturase
CAPG	ENSG00000042493	-0.193754	5.46354	6.86392e-07	3.90705e-06	protein_coding	2	85621871	85645555	-	capping actin protein, gelsolin like
ADAM28	ENSG00000042980	0.481544	1.63094	9.70947e-05	0.000356266	protein_coding	8	24151553	24216531	+	ADAM metallopeptidase domain 28
JADE2	ENSG00000043143	0.478903	8.25637	5.34048e-42	3.3278e-40	protein_coding	5	133860003	133918918	+	jade family PHD finger 2
CUL7	ENSG00000044090	-0.32145	6.09221	5.78925e-20	1.51927e-18	protein_coding	6	43005355	43021683	-	cullin 7
PHKA2	ENSG00000044446	-0.148497	4.4341	0.0100241	0.0224317	protein_coding	X	18910418	19002716	-	phosphorylase kinase regulatory subunit alpha 2
CNTLN	ENSG00000044459	0.19586	3.71171	0.00240228	0.00640401	protein_coding	9	17134980	17503921	+	centlein
HSPA5	ENSG00000044574	0.245021	10.0548	2.61956e-09	2.20426e-08	protein_coding	9	127997132	128003609	-	heat shock protein family A (Hsp70) member 5
DSG2	ENSG00000046604	0.351587	5.24614	1.88677e-15	3.27064e-14	protein_coding	18	29078006	29128971	+	desmoglein 2
GEMIN8	ENSG00000046647	-0.343694	4.20349	6.77181e-09	5.37828e-08	protein_coding	X	14026398	14048012	-	gem nuclear organelle associated protein 8
GPM6B	ENSG00000046653	-0.359184	6.60954	2.81968e-13	3.91023e-12	protein_coding	X	13789150	13956757	-	glycoprotein M6B
PREX2	ENSG00000046889	-0.247485	6.09489	2.05665e-10	2.02163e-09	protein_coding	8	68864353	69149265	+	phosphatidylinositol-3,4,5-trisphosphate dependent Rac exchange factor 2
WDR37	ENSG00000047056	-0.170797	4.07558	0.00168654	0.00467239	protein_coding	10	1095478	1178237	+	WD repeat domain 37
YTHDC2	ENSG00000047188	0.0975842	6.7693	0.00348895	0.00888412	protein_coding	5	112849380	112930982	+	YTH domain containing 2
CTPS2	ENSG00000047230	0.172209	5.29906	5.57146e-05	0.000215323	protein_coding	X	16606126	16731059	-	CTP synthase 2
POLR2B	ENSG00000047315	-0.0999597	7.09617	0.00288754	0.00752196	protein_coding	4	57843888	57897334	+	RNA polymerase II subunit B
FAM214A	ENSG00000047346	-0.26691	4.19861	2.0145e-06	1.05029e-05	protein_coding	15	52873514	53002014	-	family with sequence similarity 214 member A
ARAP2	ENSG00000047365	0.283025	4.09565	7.94982e-07	4.46763e-06	protein_coding	4	35949843	36246131	-	ArfGAP with RhoGAP domain, ankyrin repeat and PH domain 2
TPR	ENSG00000047410	0.17671	7.69522	1.85568e-06	9.73972e-06	protein_coding	1	186280784	186344825	-	translocated promoter region, nuclear basket protein
XK	ENSG00000047597	0.388158	1.69171	0.00251896	0.00668243	protein_coding	X	37545012	37591383	+	X-linked Kx blood group
C12orf4	ENSG00000047621	0.128776	4.79174	0.00936535	0.0211449	protein_coding	12	4596894	4647674	-	chromosome 12 open reading frame 4
SCML1	ENSG00000047634	0.143423	4.88515	0.000881792	0.00262147	protein_coding	X	17755588	17773105	+	Scm polycomb group protein like 1
USP28	ENSG00000048028	0.37113	4.82336	1.64047e-17	3.47371e-16	protein_coding	11	113668596	113746292	-	ubiquitin specific peptidase 28
TSPAN17	ENSG00000048140	-0.143266	6.09937	5.94106e-05	0.000227926	protein_coding	5	176074388	176086058	+	tetraspanin 17
CC2D2A	ENSG00000048342	-0.259255	4.62749	1.85058e-06	9.71656e-06	protein_coding	4	15471489	15603180	+	coiled-coil and C2 domain containing 2A
RRM2B	ENSG00000048392	-0.11511	6.82078	0.00158419	0.00442208	protein_coding	8	103216730	103251346	-	ribonucleotide reductase regulatory TP53 inducible subunit M2B
ZNF800	ENSG00000048405	0.14238	5.00069	0.00539228	0.0130449	protein_coding	7	126986844	127071978	-	zinc finger protein 800
RSF1	ENSG00000048649	0.155946	6.42909	0.000129221	0.000464034	protein_coding	11	77371041	77532063	-	remodeling and spacing factor 1
VPS13D	ENSG00000048707	0.10824	6.35797	0.00308607	0.0079818	protein_coding	1	12290124	12572099	+	vacuolar protein sorting 13 homolog D
CELF2	ENSG00000048740	-0.203531	3.45372	0.0224146	0.0451066	protein_coding	10	11047259	11378674	+	CUGBP Elav-like family member 2
COL9A2	ENSG00000049089	-0.538655	2.37655	2.17881e-07	1.34877e-06	protein_coding	1	40766159	40783488	-	collagen type IX alpha 2 chain
KITLG	ENSG00000049130	0.282791	4.50371	1.50113e-06	8.01869e-06	protein_coding	12	88886570	88974628	-	KIT ligand
H6PD	ENSG00000049239	-0.271217	6.21983	1.36045e-10	1.3677e-09	protein_coding	1	9294834	9331396	+	hexose-6-phosphate dehydrogenase/glucose 1-dehydrogenase
VAMP3	ENSG00000049245	-0.153657	7.22107	8.50504e-05	0.000315924	protein_coding	1	7831329	7841492	+	vesicle associated membrane protein 3
PER3	ENSG00000049246	-0.147133	5.18231	0.00164809	0.00457603	protein_coding	1	7844380	7905237	+	period circadian regulator 3
TNFRSF9	ENSG00000049249	0.573228	1.08949	0.000221757	0.00075822	protein_coding	1	7979907	8000926	-	TNF receptor superfamily member 9
RCN1	ENSG00000049449	0.223336	8.56943	2.77716e-12	3.47329e-11	protein_coding	11	31833939	32127301	+	reticulocalbin 1
ELN	ENSG00000049540	0.36554	1.9509	0.00691373	0.016245	protein_coding	7	73442119	73484237	+	elastin
RFC2	ENSG00000049541	0.20282	6.30904	4.18131e-07	2.46436e-06	protein_coding	7	73645829	73668774	-	replication factor C subunit 2
PTCD2	ENSG00000049883	0.209853	3.46255	0.00357908	0.00908795	protein_coding	5	71616194	71656052	+	pentatricopeptide repeat domain 2
DKK3	ENSG00000050165	0.173729	9.64851	4.21704e-08	2.96767e-07	protein_coding	11	11984653	12031316	-	dickkopf WNT signaling pathway inhibitor 3
NFE2L3	ENSG00000050344	0.772493	6.29418	2.18018e-76	2.0697e-74	protein_coding	7	26191860	26226745	+	nuclear factor, erythroid 2 like 3
SLC4A8	ENSG00000050438	-0.364314	4.46138	1.97485e-10	1.948e-09	protein_coding	12	51785101	51902980	+	solute carrier family 4 member 8
HERPUD1	ENSG00000051108	-0.539789	8.01554	2.91182e-37	1.6152e-35	protein_coding	16	56965960	56977798	+	homocysteine inducible ER protein with ubiquitin like domain 1
RAD51	ENSG00000051180	0.270251	4.19722	1.61264e-06	8.55938e-06	protein_coding	15	40986972	41024354	+	RAD51 recombinase
POLQ	ENSG00000051341	0.647314	5.84223	1.38613e-41	8.56194e-40	protein_coding	3	121150278	121264853	-	DNA polymerase theta
HEBP2	ENSG00000051620	-0.3699	5.02404	4.25863e-14	6.42885e-13	protein_coding	6	138724668	138743334	+	heme binding protein 2
MPHOSPH9	ENSG00000051825	0.231317	5.76863	4.10402e-10	3.86494e-09	protein_coding	12	123636867	123728561	-	M-phase phosphoprotein 9
SIKE1	ENSG00000052723	0.240753	4.89198	8.69564e-07	4.85206e-06	protein_coding	1	115312100	115323306	-	suppressor of IKBKE 1
FNIP2	ENSG00000052795	0.161355	3.5384	0.0130765	0.028278	protein_coding	4	159690290	159829201	+	folliculin interacting protein 2
TTC17	ENSG00000052841	0.0858074	6.56488	0.0140722	0.0301254	protein_coding	11	43380482	43516483	+	tetratricopeptide repeat domain 17
FOXN3	ENSG00000053254	-0.283255	5.28397	2.76408e-11	3.0593e-10	protein_coding	14	89591215	90085493	-	forkhead box N3
AKR7A2	ENSG00000053371	-0.239643	5.64694	2.68286e-10	2.59475e-09	protein_coding	1	19630459	19638640	-	aldo-keto reductase family 7 member A2
USE1	ENSG00000053501	-0.30526	3.55193	7.3848e-06	3.39922e-05	protein_coding	19	17326155	17330638	+	unconventional SNARE in the ER 1
ANAPC4	ENSG00000053900	0.214785	4.41841	4.74594e-05	0.000185805	protein_coding	4	25378835	25420120	+	anaphase promoting complex subunit 4
THRAP3	ENSG00000054118	0.137631	7.4066	2.52005e-05	0.000104811	protein_coding	1	36690017	36770958	+	thyroid hormone receptor associated protein 3
PHPT1	ENSG00000054148	-0.251678	5.94507	1.09843e-09	9.74736e-09	protein_coding	9	139743176	139745488	+	phosphohistidine phosphatase 1
ARID4B	ENSG00000054267	0.271867	5.65618	1.09187e-08	8.43038e-08	protein_coding	1	235294949	235491534	-	AT-rich interaction domain 4B
KIF1B	ENSG00000054523	0.170164	6.81813	5.6595e-07	3.27016e-06	protein_coding	1	10270863	10441661	+	kinesin family member 1B
SYNE2	ENSG00000054654	0.244728	6.26142	2.27931e-07	1.40563e-06	protein_coding	14	64319683	64693165	+	spectrin repeat containing nuclear envelope protein 2
ATP9A	ENSG00000054793	-0.418069	4.98421	2.90102e-13	4.00732e-12	protein_coding	20	50213053	50385173	-	ATPase phospholipid transporting 9A (putative)
FAM168A	ENSG00000054965	-0.12266	7.11642	0.00374967	0.00947633	protein_coding	11	73111532	73309234	-	family with sequence similarity 168 member A
RELT	ENSG00000054967	0.273028	4.78359	5.14784e-06	2.46918e-05	protein_coding	11	73087309	73108519	+	RELT TNF receptor
NOP58	ENSG00000055044	0.160072	5.76665	0.000453374	0.00144306	protein_coding	2	203130439	203168389	+	NOP58 ribonucleoprotein
CUL1	ENSG00000055130	0.104433	7.39693	0.00580178	0.0138978	protein_coding	7	148395006	148498128	+	cullin 1
CYFIP2	ENSG00000055163	-0.328884	6.21108	6.23645e-19	1.4876e-17	protein_coding	5	156693089	156822606	+	cytoplasmic FMR1 interacting protein 2
EIF2AK2	ENSG00000055332	1.8734	8.10073	0	0	protein_coding	2	37326353	37384208	-	eukaryotic translation initiation factor 2 alpha kinase 2
USP36	ENSG00000055483	-0.0920582	6.09457	0.0125343	0.0272808	protein_coding	17	76783463	76837523	-	ubiquitin specific peptidase 36
MCOLN3	ENSG00000055732	-0.184976	4.24997	0.000264306	0.000885999	protein_coding	1	85483765	85514182	-	mucolipin 3
MRPL43	ENSG00000055950	-0.183969	5.24313	2.01425e-06	1.05029e-05	protein_coding	10	102729215	102747272	-	mitochondrial ribosomal protein L43
C4orf27	ENSG00000056050	0.129128	4.51857	0.00957557	0.0215542	protein_coding	4	170650616	170679104	-	histone PARylation factor 1
ZNF280C	ENSG00000056277	0.224794	2.3081	0.0165985	0.0347316	protein_coding	X	129336685	129402873	-	zinc finger protein 280C
RC3H2	ENSG00000056586	0.147404	6.29052	0.000660722	0.0020238	protein_coding	9	125606835	125667620	-	ring finger and CCCH-type domains 2
TRAF3IP2	ENSG00000056972	0.130092	4.58219	0.00742993	0.0172828	protein_coding	6	111877657	111927481	-	TRAF3 interacting protein 2
SOAT1	ENSG00000057252	0.272867	5.90985	1.18597e-11	1.37617e-10	protein_coding	1	179262925	179327815	+	sterol O-acyltransferase 1
PKP2	ENSG00000057294	0.359514	5.00172	7.95719e-12	9.40305e-11	protein_coding	12	32943679	33049774	-	plakophilin 2
PRDM1	ENSG00000057657	0.207453	5.7871	4.21984e-08	2.96815e-07	protein_coding	6	106534195	106557814	+	PR/SET domain 1
PITHD1	ENSG00000057757	0.150258	5.3925	0.000217691	0.000746481	protein_coding	1	24104895	24114722	+	PITH domain containing 1
CROCC	ENSG00000058453	-0.205992	4.81169	7.42779e-05	0.000279282	protein_coding	1	17066768	17299474	+	ciliary rootlet coiled-coil, rootletin
RIOK2	ENSG00000058729	0.349544	4.80993	1.27266e-12	1.65154e-11	protein_coding	5	96496571	96518964	-	RIO kinase 2
NDC1	ENSG00000058804	0.29056	5.97845	1.07277e-14	1.72045e-13	protein_coding	1	54231133	54304533	-	NDC1 transmembrane nucleoporin
DGKG	ENSG00000058866	0.261498	5.02897	8.38237e-07	4.69021e-06	protein_coding	3	185823457	186080026	-	diacylglycerol kinase gamma
FLYWCH1	ENSG00000059122	0.189456	5.91148	9.97155e-07	5.50967e-06	protein_coding	16	2961938	3001209	+	FLYWCH-type zinc finger 1
UNKL	ENSG00000059145	-0.146612	5.71817	0.000932696	0.00276004	protein_coding	16	1413206	1464752	-	unk like zinc finger
PARP12	ENSG00000059378	1.95731	6.17613	0	0	protein_coding	7	139723544	139763521	-	poly(ADP-ribose) polymerase family member 12
ALDH18A1	ENSG00000059573	-0.118313	6.746	0.000694172	0.00211435	protein_coding	10	97365696	97416463	-	aldehyde dehydrogenase 18 family member A1
TARBP1	ENSG00000059588	0.147058	5.34496	0.00106427	0.0031065	protein_coding	1	234527059	234614849	-	TAR (HIV-1) RNA binding protein 1
CDK17	ENSG00000059758	0.312102	6.37362	5.71224e-19	1.36949e-17	protein_coding	12	96672039	96794338	-	cyclin dependent kinase 17
SLC2A3	ENSG00000059804	0.321179	5.2893	1.39599e-12	1.80331e-11	protein_coding	12	8071826	8088871	-	solute carrier family 2 member 3
YBX3	ENSG00000060138	-0.0846712	7.48135	0.013483	0.0290638	protein_coding	12	10851683	10875911	-	Y-box binding protein 3
STYK1	ENSG00000060140	0.884032	0.712469	3.18999e-08	2.29048e-07	protein_coding	12	10771538	10826917	-	serine/threonine/tyrosine kinase 1
WNK1	ENSG00000060237	0.0816049	8.37005	0.0147626	0.031387	protein_coding	12	861759	1020618	+	WNK lysine deficient protein kinase 1
OGFR	ENSG00000060491	0.791053	6.99311	6.17874e-94	6.67163e-92	protein_coding	20	61436187	61445352	+	opioid growth factor receptor
PIGV	ENSG00000060642	-0.265222	4.00232	1.4259e-06	7.67049e-06	protein_coding	1	27113963	27124889	+	phosphatidylinositol glycan anchor biosynthesis class V
PTPRU	ENSG00000060656	0.124574	4.75964	0.016383	0.0343672	protein_coding	1	29563028	29653325	+	protein tyrosine phosphatase receptor type U
SNRNP40	ENSG00000060688	0.142036	5.65425	0.00035934	0.00117063	protein_coding	1	31732417	31769662	-	small nuclear ribonucleoprotein U5 subunit 40
COL11A1	ENSG00000060718	-0.131865	6.80653	0.000258427	0.000868072	protein_coding	1	103342023	103574052	-	collagen type XI alpha 1 chain
MPC1	ENSG00000060762	-0.336622	4.58703	2.132e-09	1.81451e-08	protein_coding	6	166778407	166796486	-	mitochondrial pyruvate carrier 1
ACAA1	ENSG00000060971	-0.130713	5.23234	0.00398237	0.00999456	protein_coding	3	38144620	38178733	-	acetyl-CoA acyltransferase 1
BCAT1	ENSG00000060982	-0.250048	8.06563	1.94478e-13	2.73448e-12	protein_coding	12	24964295	25102393	-	branched chain amino acid transaminase 1
LZTS1	ENSG00000061337	-0.59669	7.79794	3.98329e-37	2.19236e-35	protein_coding	8	20103676	20161474	-	leucine zipper tumor suppressor 1
CDH3	ENSG00000062038	-0.605437	1.05036	0.000167432	0.000587384	protein_coding	16	68670092	68756519	+	cadherin 3
GPBP1	ENSG00000062194	0.288035	6.12471	7.65022e-13	1.01512e-11	protein_coding	5	56469775	56560506	+	GC-rich promoter binding protein 1
LTK	ENSG00000062524	-0.265891	2.48975	0.00390824	0.00983317	protein_coding	15	41795836	41806085	-	leukocyte receptor tyrosine kinase
WAPAL	ENSG00000062650	0.243019	6.4918	5.14042e-11	5.47525e-10	protein_coding	10	88195013	88281572	-	WAPL cohesin release factor
VMP1	ENSG00000062716	-0.238917	8.4493	5.72121e-12	6.86983e-11	protein_coding	17	57784553	57919616	+	vacuole membrane protein 1
APPBP2	ENSG00000062725	0.192465	5.91559	1.20966e-06	6.59876e-06	protein_coding	17	58520520	58603580	-	amyloid beta precursor protein binding protein 2
POLD1	ENSG00000062822	0.421786	4.84987	5.14812e-12	6.21863e-11	protein_coding	19	50887461	50921273	+	DNA polymerase delta 1, catalytic subunit
EIF4B	ENSG00000063046	-0.0838586	8.3154	0.0132915	0.0287036	protein_coding	12	53399942	53435993	+	eukaryotic translation initiation factor 4B
SLC6A16	ENSG00000063127	0.181062	3.32455	0.00728201	0.0170114	protein_coding	19	49792895	49828482	-	solute carrier family 6 member 16
RPL18	ENSG00000063177	-0.144517	8.51043	0.000117989	0.000426624	protein_coding	19	49118585	49122793	-	ribosomal protein L18
CA11	ENSG00000063180	-0.442413	2.26224	5.68552e-05	0.000219312	protein_coding	19	49141199	49149569	-	carbonic anhydrase 11
ISOC2	ENSG00000063241	-0.170118	6.47355	0.000804124	0.00241484	protein_coding	19	55964352	55973710	-	isochorismatase domain containing 2
AHRR	ENSG00000063438	-0.435063	2.13355	4.2835e-05	0.00016953	protein_coding	5	304291	438406	+
GPC1	ENSG00000063660	0.100533	8.27568	0.0110454	0.024412	protein_coding	2	241375088	241407493	+	glypican 1
HAGH	ENSG00000063854	-0.127037	5.48497	0.000888624	0.00263956	protein_coding	16	1845621	1877195	-	hydroxyacylglutathione hydrolase
RNF4	ENSG00000063978	0.100437	7.42052	0.017076	0.0355887	protein_coding	4	2463947	2627047	+	ring finger protein 4
CASP8	ENSG00000064012	0.296379	5.22065	1.14937e-12	1.49704e-11	protein_coding	2	202098166	202152434	+	caspase 8
TM7SF3	ENSG00000064115	0.102584	7.20396	0.00315936	0.00813933	protein_coding	12	27126128	27167367	-	transmembrane 7 superfamily member 3
NGFR	ENSG00000064300	0.856285	1.09642	1.03068e-10	1.05112e-09	protein_coding	17	47572655	47592379	+	nerve growth factor receptor
HIPK2	ENSG00000064393	-0.20222	7.98219	2.89341e-10	2.7785e-09	protein_coding	7	139246316	139477577	-	homeodomain interacting protein kinase 2
TNPO3	ENSG00000064419	0.117141	7.02131	0.000386557	0.0012478	protein_coding	7	128594948	128695198	-	transportin 3
CTSA	ENSG00000064601	-0.0907537	8.06084	0.0163131	0.0342612	protein_coding	20	44518783	44527459	+	cathepsin A
SLC12A2	ENSG00000064651	-0.145639	6.17305	0.000140655	0.000501529	protein_coding	5	127419458	127525380	+	solute carrier family 12 member 2
SNX24	ENSG00000064652	-0.133736	4.88605	0.00305138	0.00790797	protein_coding	5	122179134	122365049	+	sorting nexin 24
DDX20	ENSG00000064703	0.317602	4.3364	5.68993e-08	3.9165e-07	protein_coding	1	112297867	112310638	+	DEAD-box helicase 20
BTBD1	ENSG00000064726	-0.0915511	7.18878	0.0147727	0.0313988	protein_coding	15	83685174	83736106	-	BTB domain containing 1
PMS1	ENSG00000064933	0.245959	4.28163	8.89678e-07	4.95648e-06	protein_coding	2	190649107	190742355	+	PMS1 homolog 1, mismatch repair system component
HMG20B	ENSG00000064961	-0.286511	6.33143	1.56636e-15	2.73196e-14	protein_coding	19	3572775	3579086	+	high mobility group 20B
ANKS1A	ENSG00000064999	0.15775	4.92736	0.000230366	0.000783489	protein_coding	6	34857042	35059179	+	ankyrin repeat and sterile alpha motif domain containing 1A
AP3D1	ENSG00000065000	0.09913	8.1395	0.00308119	0.00797064	protein_coding	19	2100988	2164464	-	adaptor related protein complex 3 subunit delta 1
ZNF76	ENSG00000065029	-0.188193	4.95073	0.000356061	0.00116075	protein_coding	6	35226686	35263762	+	zinc finger protein 76
SLC9A3R2	ENSG00000065054	0.0966579	7.50016	0.00813427	0.0186876	protein_coding	16	2075357	2089027	+	SLC9A3 regulator 2
UHRF1BP1	ENSG00000065060	0.429498	5.35175	9.75358e-24	3.27706e-22	protein_coding	6	34759857	34850915	+	UHRF1 binding protein 1
OAT	ENSG00000065154	-0.185999	6.39936	9.30725e-08	6.13758e-07	protein_coding	10	126085872	126107545	-	ornithine aminotransferase
PKN2	ENSG00000065243	0.0928833	6.23313	0.0157095	0.0331757	protein_coding	1	89149905	89301938	+	protein kinase N2
TRAM2	ENSG00000065308	0.15316	8.10506	3.10216e-05	0.000126113	protein_coding	6	52362200	52441713	-	translocation associated membrane protein 2
MCM10	ENSG00000065328	0.476451	4.37448	1.9499e-15	3.36358e-14	protein_coding	10	13203554	13253104	+	minichromosome maintenance 10 replication initiation factor
DGKA	ENSG00000065357	0.152041	4.49135	0.00603926	0.0144008	protein_coding	12	56321103	56347811	+	diacylglycerol kinase alpha
PDIA5	ENSG00000065485	-0.410843	4.63219	2.30181e-10	2.24856e-09	protein_coding	3	122785909	122944074	+	protein disulfide isomerase family A member 5
NDUFB4	ENSG00000065518	-0.249105	6.62665	5.33142e-13	7.20277e-12	protein_coding	3	120315156	120321347	+	NADH:ubiquinone oxidoreductase subunit B4
SPEN	ENSG00000065526	0.339243	7.05921	1.12388e-16	2.22339e-15	protein_coding	1	16174359	16266955	+	spen family transcriptional repressor
MYLK	ENSG00000065534	-0.207892	8.87353	1.90181e-09	1.63533e-08	protein_coding	3	123328896	123603178	-	myosin light chain kinase
ZC3H15	ENSG00000065548	0.105683	6.17161	0.00240101	0.00640194	protein_coding	2	187350883	187374090	+	zinc finger CCCH-type containing 15
MAP2K4	ENSG00000065559	-0.0937219	5.56972	0.0186016	0.038339	protein_coding	17	11924141	12047147	+	mitogen-activated protein kinase kinase 4
TMEM206	ENSG00000065600	0.205046	3.92218	0.000912587	0.0027079	protein_coding	1	212537273	212588243	-	proton activated chloride channel 1
SLK	ENSG00000065613	0.208192	7.47748	3.74252e-08	2.65752e-07	protein_coding	10	105726959	105788991	+	STE20 like kinase
CYB5R4	ENSG00000065615	-0.143415	4.30715	0.00386888	0.009748	protein_coding	6	84569362	84677143	+	cytochrome b5 reductase 4
COL17A1	ENSG00000065618	0.230362	2.22921	0.0134739	0.0290575	protein_coding	10	105791044	105845760	-	collagen type XVII alpha 1 chain
ASB1	ENSG00000065802	-0.285068	6.57904	4.73708e-13	6.44288e-12	protein_coding	2	239335383	239360891	+	ankyrin repeat and SOCS box containing 1
FAM107B	ENSG00000065809	-0.277271	5.04239	2.14226e-08	1.5766e-07	protein_coding	10	14560556	14816896	-	family with sequence similarity 107 member B
TBC1D1	ENSG00000065882	-0.11913	7.30618	0.00163206	0.00453723	protein_coding	4	37892708	38140796	+	TBC1 domain family member 1
MTHFD2	ENSG00000065911	0.393033	4.97899	1.03536e-13	1.49746e-12	protein_coding	2	74425689	74444692	+	methylenetetrahydrofolate dehydrogenase (NADP+ dependent) 2, methenyltetrahydrofolate cyclohydrolase
SLC9A7	ENSG00000065923	-0.15549	4.25266	0.00623154	0.0147969	protein_coding	X	46464753	46618490	-	solute carrier family 9 member A7
FOXJ2	ENSG00000065970	0.11965	5.32013	0.00652812	0.0154106	protein_coding	12	8185299	8208099	+	forkhead box J2
YBX1	ENSG00000065978	-0.17126	9.2687	2.28065e-07	1.40565e-06	protein_coding	1	43148098	43168020	+	Y-box binding protein 1
CTNNA2	ENSG00000066032	-0.541488	3.66794	3.14045e-09	2.60997e-08	protein_coding	2	79412357	80875905	+	catenin alpha 2
ELAVL1	ENSG00000066044	0.110931	6.96535	0.00124344	0.00355826	protein_coding	19	8023463	8070543	-	ELAV like RNA binding protein 1
SLC9A3	ENSG00000066230	-0.735168	1.09363	1.55565e-08	1.16736e-07	protein_coding	5	473425	524447	-	solute carrier family 9 member A3
NGEF	ENSG00000066248	-0.406975	3.1781	1.04753e-06	5.76327e-06	protein_coding	2	233743396	233877982	-	neuronal guanine nucleotide exchange factor
GOLGA5	ENSG00000066455	-0.188167	4.86344	5.16684e-05	0.000200893	protein_coding	14	93260576	93306308	+	golgin A5
LRRC40	ENSG00000066557	0.184665	4.62389	0.000350666	0.00114421	protein_coding	1	70610488	70671303	-	leucine rich repeat containing 40
EML1	ENSG00000066629	-0.334817	4.44898	4.10896e-09	3.35767e-08	protein_coding	14	100204030	100408397	+	EMAP like 1
ARFGEF1	ENSG00000066777	0.0815469	6.20466	0.0218307	0.0440884	protein_coding	8	68085747	68255912	-	ADP ribosylation factor guanine nucleotide exchange factor 1
MTFR1	ENSG00000066855	-0.186237	4.69523	0.000306474	0.00101192	protein_coding	8	66556969	66683496	+	mitochondrial fission regulator 1
FECH	ENSG00000066926	-0.284108	5.23283	4.98198e-10	4.64536e-09	protein_coding	18	55215515	55254004	-	ferrochelatase
PFKP	ENSG00000067057	0.158205	7.78695	3.69352e-06	1.82547e-05	protein_coding	10	3108525	3179904	+	phosphofructokinase, platelet
SP100	ENSG00000067066	1.86616	6.89317	0	0	protein_coding	2	231280657	231408805	+	SP100 nuclear antigen
KLF6	ENSG00000067082	0.346353	6.08385	1.12133e-21	3.3392e-20	protein_coding	10	3818188	3827473	-	Kruppel like factor 6
PPAP2A	ENSG00000067113	-0.216836	4.38026	2.63638e-05	0.000109008	protein_coding	5	54720682	54830878	-	phospholipid phosphatase 1
NEO1	ENSG00000067141	-0.10546	6.07282	0.0042903	0.0106711	protein_coding	15	73344051	73597547	+	neogenin 1
PHKA1	ENSG00000067177	-0.146465	5.48057	0.00049748	0.00156967	protein_coding	X	71798664	71934167	-	phosphorylase kinase regulatory subunit alpha 1
TNFRSF1A	ENSG00000067182	0.0865657	7.67838	0.0249602	0.0496153	protein_coding	12	6437923	6451280	-	TNF receptor superfamily member 1A
STOML1	ENSG00000067221	-0.148255	4.538	0.00161878	0.00450564	protein_coding	15	74275547	74286963	-	stomatin like 1
DNTTIP2	ENSG00000067334	0.143271	5.78698	7.61346e-05	0.000285565	protein_coding	1	94333373	94345474	-	deoxynucleotidyltransferase terminal interacting protein 2
METTL22	ENSG00000067365	-0.28594	3.47631	3.05883e-06	1.53278e-05	protein_coding	16	8715540	8740081	+	methyltransferase like 22
TP53BP1	ENSG00000067369	0.105018	6.74645	0.00312881	0.00807758	protein_coding	15	43699407	43802926	-	tumor protein p53 binding protein 1
TRO	ENSG00000067445	-0.179199	4.1341	0.021526	0.0435351	protein_coding	X	54946895	54957864	+	trophinin
RHOA	ENSG00000067560	-0.156006	8.79053	9.17073e-05	0.000338518	protein_coding	3	49396578	49450431	-	ras homolog family member A
IARS2	ENSG00000067704	-0.198228	7.35642	3.75891e-09	3.10208e-08	protein_coding	1	220267444	220321380	+	isoleucyl-tRNA synthetase 2, mitochondrial
NAV3	ENSG00000067798	0.252526	4.47732	6.12173e-07	3.51611e-06	protein_coding	12	78224685	78606790	+	neuron navigator 3
IDH3G	ENSG00000067829	-0.131071	6.03074	0.00070369	0.00214104	protein_coding	X	153051221	153059978	-	isocitrate dehydrogenase (NAD(+)) 3 non-catalytic subunit gamma
ROGDI	ENSG00000067836	-0.410779	4.31515	1.83656e-14	2.87687e-13	protein_coding	16	4846969	4852951	-	rogdi atypical leucine zipper
CBFB	ENSG00000067955	0.111492	6.59255	0.00635809	0.0150469	protein_coding	16	67063019	67134961	+	core-binding factor subunit beta
FGFR3	ENSG00000068078	-0.528835	2.27617	3.90602e-09	3.2085e-08	protein_coding	4	1795034	1810599	+	fibroblast growth factor receptor 3
IFI35	ENSG00000068079	2.72301	6.2892	0	0	protein_coding	17	41158742	41166473	+	interferon induced protein 35
PLEKHH3	ENSG00000068137	0.116564	5.45892	0.0134476	0.029014	protein_coding	17	40819932	40829048	-	pleckstrin homology, MyTH4 and FERM domain containing H3
ACSL4	ENSG00000068366	-0.128548	7.48679	0.000771933	0.00232963	protein_coding	X	108867473	108976632	-	acyl-CoA synthetase long chain family member 4
INPP5A	ENSG00000068383	-0.116514	5.38734	0.00280933	0.00734799	protein_coding	10	134351324	134596979	+	inositol polyphosphate-5-phosphatase A
GRIPAP1	ENSG00000068400	0.124131	5.68034	0.000801119	0.00240795	protein_coding	X	48830134	48858675	-	GRIP1 associated protein 1
PRR11	ENSG00000068489	-0.176555	6.28435	1.81858e-06	9.56632e-06	protein_coding	17	57232860	57282066	+	proline rich 11
REEP1	ENSG00000068615	-0.560429	1.33549	5.51603e-05	0.000213356	protein_coding	2	86441116	86565206	-	receptor accessory protein 1
ATP11A	ENSG00000068650	0.156552	6.31668	0.000241317	0.000816805	protein_coding	13	113344643	113541482	+	ATPase phospholipid transporting 11A
POLR1A	ENSG00000068654	0.105935	6.65379	0.00297037	0.00772067	protein_coding	2	86247339	86333278	-	RNA polymerase I subunit A
IP6K2	ENSG00000068745	-0.170792	5.88174	2.00655e-06	1.0481e-05	protein_coding	3	48725436	48777786	-	inositol hexakisphosphate kinase 2
CYFIP1	ENSG00000068793	-0.152555	6.87033	6.64598e-06	3.09642e-05	protein_coding	15	22892005	23006016	+	NA
KIF2A	ENSG00000068796	0.140791	5.74497	0.00079357	0.00238831	protein_coding	5	61601989	61833076	+	kinesin family member 2A
SIRT2	ENSG00000068903	-0.273095	5.17998	2.65815e-07	1.61718e-06	protein_coding	19	39369197	39390502	-	sirtuin 2
MAST4	ENSG00000069020	0.206135	5.81557	2.04608e-08	1.51053e-07	protein_coding	5	65892176	66465423	+	microtubule associated serine/threonine kinase family member 4
NUP133	ENSG00000069248	0.137797	6.13245	0.000158345	0.000558273	protein_coding	1	229577045	229644103	-	nucleoporin 133
BCL3	ENSG00000069399	0.212163	3.60479	0.000997262	0.00292965	protein_coding	19	45250962	45263301	+	BCL3 transcription coactivator
KCNAB2	ENSG00000069424	-0.277963	2.58813	0.00485271	0.0119045	protein_coding	1	6051526	6161253	+	potassium voltage-gated channel subfamily A regulatory beta subunit 2
ABCC9	ENSG00000069431	0.565534	0.0224341	0.00718673	0.0168249	protein_coding	12	21950335	22094336	-	ATP binding cassette subfamily C member 9
MAOB	ENSG00000069535	-0.784426	1.34301	6.65856e-05	0.000253391	protein_coding	X	43625858	43741693	-	monoamine oxidase B
TGFBR3	ENSG00000069702	0.424834	1.15784	0.00274002	0.00719999	protein_coding	1	92145902	92371892	-	transforming growth factor beta receptor 3
RAB27A	ENSG00000069974	-0.101345	5.05952	0.0213217	0.0431777	protein_coding	15	55495164	55611311	-	RAB27A, member RAS oncogene family
PHRF1	ENSG00000070047	0.209119	6.05247	5.91432e-08	4.0532e-07	protein_coding	11	576486	612222	+	PHD and ring finger domains 1
IKBKAP	ENSG00000070061	0.157165	6.3163	1.04781e-05	4.68581e-05	protein_coding	9	111629797	111696396	-	elongator complex protein 1
NUCB2	ENSG00000070081	0.158928	6.89176	6.93531e-06	3.21113e-05	protein_coding	11	17229700	17371521	+	nucleobindin 2
SLC44A1	ENSG00000070214	0.120873	6.55464	0.000615394	0.00190018	protein_coding	9	108006903	108201452	+	solute carrier family 44 member 1
SMG6	ENSG00000070366	0.108613	6.38845	0.00646367	0.0152788	protein_coding	17	1963133	2207065	-	SMG6 nonsense mediated mRNA decay factor
FSTL3	ENSG00000070404	0.326325	6.24495	5.538e-14	8.26319e-13	protein_coding	19	676392	683385	+	follistatin like 3
MNT	ENSG00000070444	-0.383663	4.57935	3.42445e-10	3.26188e-09	protein_coding	17	2287354	2304412	-	MAX network transcriptional repressor
JMJD6	ENSG00000070495	0.217637	5.05275	2.81952e-06	1.42793e-05	protein_coding	17	74708919	74722866	-	jumonji domain containing 6, arginine demethylase and lysine hydroxylase
WIPI1	ENSG00000070540	-0.47635	3.787	9.58693e-12	1.12444e-10	protein_coding	17	66417089	66453654	-	WD repeat domain, phosphoinositide interacting 1
ASNS	ENSG00000070669	0.338873	5.34109	6.87075e-17	1.37854e-15	protein_coding	7	97481430	97501854	-	asparagine synthetase (glutamine-hydrolyzing)
AP3M2	ENSG00000070718	0.176572	5.57498	1.07671e-05	4.80749e-05	protein_coding	8	42010464	42029191	+	adaptor related protein complex 3 subunit mu 2
ST6GALNAC2	ENSG00000070731	-0.657431	1.28516	1.79305e-07	1.12924e-06	protein_coding	17	74559792	74583038	-	ST6 N-acetylgalactosaminide alpha-2,6-sialyltransferase 2
PABPC1	ENSG00000070756	-0.0994585	9.11324	0.0025979	0.00686097	protein_coding	8	101698044	101735037	-	poly(A) binding protein cytoplasmic 1
TCOF1	ENSG00000070814	0.386054	6.78919	2.03614e-19	5.06173e-18	protein_coding	5	149737202	149779871	+	treacle ribosome biogenesis factor 1
CDC42	ENSG00000070831	-0.144304	7.74798	9.54365e-05	0.000351001	protein_coding	1	22379120	22419437	+	cell division cycle 42
OSBPL3	ENSG00000070882	0.173701	7.7087	3.06996e-06	1.5377e-05	protein_coding	7	24836158	25021253	-	oxysterol binding protein like 3
RAD18	ENSG00000070950	0.223056	5.53772	3.50219e-07	2.09377e-06	protein_coding	3	8817088	9005457	-	RAD18 E3 ubiquitin protein ligase
ATP2B1	ENSG00000070961	-0.221246	6.85168	1.11048e-06	6.09063e-06	protein_coding	12	89981828	90103077	-	ATPase plasma membrane Ca2+ transporting 1
MAP4K4	ENSG00000071054	-0.155685	7.83892	2.55256e-06	1.30677e-05	protein_coding	2	102313312	102511149	+	mitogen-activated protein kinase kinase kinase kinase 4
RPL31	ENSG00000071082	-0.207898	6.43629	2.42305e-07	1.48373e-06	protein_coding	2	101618177	101640494	+	ribosomal protein L31
WDR1	ENSG00000071127	-0.179424	9.4484	5.77386e-08	3.9627e-07	protein_coding	4	10075963	10118573	-	WD repeat domain 1
RPS6KA2	ENSG00000071242	-0.533004	4.905	2.36785e-26	9.10143e-25	protein_coding	6	166822852	167319939	-	ribosomal protein S6 kinase A2
LMCD1	ENSG00000071282	-0.421311	2.12581	1.7883e-05	7.66996e-05	protein_coding	3	8543393	8609805	+	LIM and cysteine rich domains 1
SEL1L	ENSG00000071537	-0.152528	6.12279	2.67248e-05	0.000110404	protein_coding	14	81937893	82000205	-	SEL1L adaptor subunit of ERAD E3 ubiquitin ligase
TRIP13	ENSG00000071539	0.181146	6.11163	0.000122208	0.000440979	protein_coding	5	892758	919472	+	thyroid hormone receptor interactor 13
ATP6AP1	ENSG00000071553	0.0892504	7.83827	0.017164	0.0357456	protein_coding	X	153656978	153664862	+	ATPase H+ transporting accessory protein 1
TRIB2	ENSG00000071575	-0.120617	7.58448	0.00200234	0.00544883	protein_coding	2	12857015	12882860	+	tribbles pseudokinase 2
MBD3	ENSG00000071655	0.118513	7.20998	0.00217257	0.0058513	protein_coding	19	1576639	1592882	-	methyl-CpG binding domain protein 3
FAM3A	ENSG00000071889	-0.186313	5.32226	2.22593e-05	9.38194e-05	protein_coding	X	153733350	153744566	-	family with sequence similarity 3 member A
CYBRD1	ENSG00000071967	-0.116848	5.53624	0.0111684	0.0246569	protein_coding	2	172378757	172414643	+	cytochrome b reductase 1
PDCD2	ENSG00000071994	-0.0890524	5.99801	0.0246591	0.0490789	protein_coding	6	170884383	170893780	-	programmed cell death 2
RDH11	ENSG00000072042	0.193359	5.95349	1.89977e-07	1.18904e-06	protein_coding	14	68143518	68162531	-	retinol dehydrogenase 11
LPHN1	ENSG00000072071	0.175238	4.84526	0.000227559	0.000775805	protein_coding	19	14260750	14316999	-	adhesion G protein-coupled receptor L1
ZFYVE26	ENSG00000072121	0.528986	4.84091	7.62892e-33	3.78636e-31	protein_coding	14	68194091	68283307	-	zinc finger FYVE-type containing 26
LIMS2	ENSG00000072163	-0.466677	1.88453	5.64554e-05	0.000218007	protein_coding	2	128395956	128439360	-	LIM zinc finger domain containing 2
ALDH3A2	ENSG00000072210	0.202159	6.23717	5.68399e-08	3.91508e-07	protein_coding	17	19551449	19580911	+	aldehyde dehydrogenase 3 family member A2
TFRC	ENSG00000072274	-0.11766	7.65153	0.0120771	0.0264035	protein_coding	3	195754054	195809060	-	transferrin receptor
MPP5	ENSG00000072415	0.126495	4.62472	0.0229583	0.04605	protein_coding	14	67707826	67802536	+	membrane palmitoylated protein 5
RHOBTB1	ENSG00000072422	-0.524724	3.5959	5.81784e-16	1.07293e-14	protein_coding	10	62629196	62761198	-	Rho related BTB domain containing 1
SMC1A	ENSG00000072501	0.208311	8.29395	1.02892e-07	6.74421e-07	protein_coding	X	53401070	53449677	-	structural maintenance of chromosomes 1A
MARK2	ENSG00000072518	0.295005	6.05654	9.16994e-16	1.64318e-14	protein_coding	11	63606400	63678491	+	microtubule affinity regulating kinase 2
P4HA2	ENSG00000072682	0.309389	6.24312	1.7634e-17	3.72844e-16	protein_coding	5	131527531	131631008	-	prolyl 4-hydroxylase subunit alpha 2
NFATC3	ENSG00000072736	0.403488	4.8692	9.96865e-22	2.98111e-20	protein_coding	16	68118654	68263162	+	nuclear factor of activated T cells 3
ACADVL	ENSG00000072778	-0.145489	8.48183	9.9048e-06	4.45055e-05	protein_coding	17	7120444	7128592	+	acyl-CoA dehydrogenase very long chain
STK10	ENSG00000072786	0.195869	5.73358	1.36542e-07	8.791e-07	protein_coding	5	171469077	171615390	-	serine/threonine kinase 10
ACAP1	ENSG00000072818	-0.331757	0.974191	0.0168312	0.0351301	protein_coding	17	7239848	7254797	+	ArfGAP with coiled-coil, ankyrin repeat and PH domains 1
EVC	ENSG00000072840	0.480827	7.57648	1.23596e-43	7.98294e-42	protein_coding	4	5712924	5830772	+	EvC ciliary complex subunit 1
SIDT1	ENSG00000072858	1.63511	0.187866	1.37187e-14	2.17791e-13	protein_coding	3	113251143	113348425	+	SID1 transmembrane family member 1
TMEM38A	ENSG00000072954	-0.266583	3.48202	8.98769e-05	0.000332542	protein_coding	19	16771938	16800840	+	transmembrane protein 38A
PVR	ENSG00000073008	0.258246	5.57849	1.05796e-07	6.91783e-07	protein_coding	19	45147098	45166850	+	PVR cell adhesion molecule
XRCC1	ENSG00000073050	0.209678	5.46933	1.65793e-08	1.23885e-07	protein_coding	19	44047192	44084625	-	X-ray repair cross complementing 1
MCM2	ENSG00000073111	0.234292	6.87923	8.92714e-08	5.90067e-07	protein_coding	3	127317066	127341276	+	minichromosome maintenance complex component 2
PANX2	ENSG00000073150	0.284793	3.95434	3.86711e-06	1.90793e-05	protein_coding	22	50609160	50618723	+	pannexin 2
PDE8A	ENSG00000073417	0.15782	6.32143	3.97676e-05	0.000158321	protein_coding	15	85523671	85682376	+	phosphodiesterase 8A
CLCN4	ENSG00000073464	-0.242866	4.67091	7.42383e-08	4.96971e-07	protein_coding	X	10125024	10205700	+	chloride voltage-gated channel 4
SDHA	ENSG00000073578	0.122408	7.42316	0.000309438	0.00102099	protein_coding	5	218356	256815	+	succinate dehydrogenase complex flavoprotein subunit A
SMARCE1	ENSG00000073584	-0.118755	6.28626	0.00224537	0.006029	protein_coding	17	38781214	38804760	-	SWI/SNF related, matrix associated, actin dependent regulator of chromatin, subfamily e, member 1
KDM5A	ENSG00000073614	0.138101	6.16199	8.28929e-05	0.000308639	protein_coding	12	389295	498620	-	lysine demethylase 5A
ADAM11	ENSG00000073670	-0.468333	0.153367	0.0156198	0.0330207	protein_coding	17	42836399	42859214	+	ADAM metallopeptidase domain 11
PPP2R3A	ENSG00000073711	-0.452149	4.42464	7.57504e-18	1.64591e-16	protein_coding	3	135684515	135866733	+	protein phosphatase 2 regulatory subunit B''alpha
MAP3K13	ENSG00000073803	-0.176932	4.67479	0.000488229	0.00154428	protein_coding	3	185000729	185206885	+	mitogen-activated protein kinase kinase kinase 13
ST6GAL1	ENSG00000073849	0.297459	2.57648	0.000406623	0.00130512	protein_coding	3	186648274	186796341	+	ST6 beta-galactoside alpha-2,6-sialyltransferase 1
FRY	ENSG00000073910	-0.362812	1.37127	0.0106332	0.0236414	protein_coding	13	32605437	32870794	+	FRY microtubule binding protein
GLI2	ENSG00000074047	0.218414	4.21664	1.59995e-05	6.91666e-05	protein_coding	2	121493199	121750229	+	GLI family zinc finger 2
TEAD2	ENSG00000074219	-0.227487	3.17941	0.00150397	0.00422097	protein_coding	19	49843852	49865714	-	TEA domain transcription factor 2
EED	ENSG00000074266	0.394768	4.0338	8.5502e-13	1.1282e-11	protein_coding	11	85955586	85989855	+	embryonic ectoderm development
TSG101	ENSG00000074319	-0.12139	6.2876	0.00415317	0.0103628	protein_coding	11	18489883	18548779	-	tumor susceptibility 101
CA12	ENSG00000074410	0.578851	6.21802	4.16929e-23	1.35574e-21	protein_coding	15	63613577	63674360	-	carbonic anhydrase 12
NTN4	ENSG00000074527	-0.310523	4.80261	3.84783e-11	4.17069e-10	protein_coding	12	96051583	96184930	-	netrin 4
NUAK1	ENSG00000074590	-0.242209	6.37299	1.9814e-10	1.95309e-09	protein_coding	12	106457118	106533811	-	NUAK family kinase 1
DPP8	ENSG00000074603	-0.161826	6.29404	2.09913e-06	1.09122e-05	protein_coding	15	65734801	65810042	-	dipeptidyl peptidase 8
PTPLAD1	ENSG00000074696	0.245708	8.45062	2.77195e-13	3.8516e-12	protein_coding	15	65822756	65870687	+	3-hydroxyacyl-CoA dehydratase 3
ZZEF1	ENSG00000074755	0.151295	6.28211	1.32938e-05	5.82713e-05	protein_coding	17	3907739	4046314	-	zinc finger ZZ-type and EF-hand domain containing 1
C19orf10	ENSG00000074842	0.122927	7.24539	0.000803581	0.00241382	protein_coding	19	4641386	4670382	-	myeloid derived growth factor
TUBE1	ENSG00000074935	0.1681	3.34872	0.0131446	0.028408	protein_coding	6	112391980	112408732	-	tubulin epsilon 1
ACTR6	ENSG00000075089	0.178526	4.1866	0.00066458	0.00203474	protein_coding	12	100592900	100635643	+	actin related protein 6
TIPIN	ENSG00000075131	0.175978	3.52984	0.0182016	0.0376186	protein_coding	15	66628544	66679084	-	TIMELESS interacting protein
SRI	ENSG00000075142	-0.346788	6.80803	8.31185e-25	2.94664e-23	protein_coding	7	87834433	87856308	-	sorcin
SEMA3A	ENSG00000075213	0.106789	8.14119	0.00770739	0.0178518	protein_coding	7	83585093	84122040	-	semaphorin 3A
SEMA3C	ENSG00000075223	-0.206952	6.7953	5.6851e-08	3.91508e-07	protein_coding	7	80371854	80551675	-	semaphorin 3C
TTC38	ENSG00000075234	0.205087	4.43774	0.000138367	0.000494119	protein_coding	22	46663858	46689905	+	tetratricopeptide repeat domain 38
ACAT1	ENSG00000075239	-0.193379	5.16556	4.95157e-06	2.38393e-05	protein_coding	11	107992243	108018503	+	acetyl-CoA acetyltransferase 1
CELSR1	ENSG00000075275	0.114489	7.19217	0.00615145	0.0146288	protein_coding	22	46756731	46933067	-	cadherin EGF LAG seven-pass G-type receptor 1
VPS9D1	ENSG00000075399	-0.256971	4.00118	3.31117e-05	0.000133972	protein_coding	16	89773542	89787394	-	VPS9 domain containing 1
MARK3	ENSG00000075413	0.0856374	6.00407	0.0159643	0.0336636	protein_coding	14	103851729	103970168	+	microtubule affinity regulating kinase 3
SLC25A3	ENSG00000075415	-0.123172	8.54413	9.60088e-05	0.000352556	protein_coding	12	98987369	98995946	+	solute carrier family 25 member 3
FNDC3B	ENSG00000075420	-0.167616	6.57262	6.44109e-06	3.01287e-05	protein_coding	3	171757418	172119455	+	fibronectin type III domain containing 3B
CACNG4	ENSG00000075461	-0.202484	4.97697	0.000285159	0.000948184	protein_coding	17	64961026	65029514	+	calcium voltage-gated channel auxiliary subunit gamma 4
ACTB	ENSG00000075624	-0.161361	12.0602	4.39469e-06	2.13912e-05	protein_coding	7	5566782	5603415	-	actin beta
MOCOS	ENSG00000075643	0.827997	1.90851	2.48887e-12	3.13213e-11	protein_coding	18	33767482	33852120	+	molybdenum cofactor sulfurase
PLD1	ENSG00000075651	-0.232762	4.48876	1.78006e-05	7.63926e-05	protein_coding	3	171318195	171528740	-	phospholipase D1
WDR62	ENSG00000075702	0.194863	6.28942	0.000122638	0.000442305	protein_coding	19	36545783	36596008	+	WD repeat domain 62
DLG1	ENSG00000075711	-0.346115	7.12909	1.21661e-23	4.04918e-22	protein_coding	3	196769431	197026171	-	discs large MAGUK scaffold protein 1
BCAP29	ENSG00000075790	0.0857174	7.47906	0.020283	0.0413286	protein_coding	7	107220422	107269615	+	B cell receptor associated protein 29
SEC31B	ENSG00000075826	-0.486781	3.22921	4.52814e-11	4.86706e-10	protein_coding	10	102246399	102289628	-	SEC31 homolog B, COPII coat complex component
SART3	ENSG00000075856	0.25101	6.31888	8.35486e-10	7.58111e-09	protein_coding	12	108916357	108955176	-	spliceosome associated factor 3, U4/U6 recycling protein
REXO2	ENSG00000076043	-0.130169	5.42475	0.00192635	0.00526128	protein_coding	11	114310108	114321001	+	RNA exonuclease 2
RBM7	ENSG00000076053	0.134405	4.26099	0.0163663	0.0343423	protein_coding	11	114270752	114284925	+	RNA binding motif protein 7
RBMS2	ENSG00000076067	0.246748	4.16535	1.05381e-06	5.79556e-06	protein_coding	12	56915713	56984745	+	RNA binding motif single stranded interacting protein 2
BAZ2A	ENSG00000076108	0.228267	7.11586	5.44682e-11	5.78853e-10	protein_coding	12	56989380	57030600	-	bromodomain adjacent to zinc finger domain 2A
MLH1	ENSG00000076242	0.132771	5.62667	0.00150984	0.00423492	protein_coding	3	37034823	37107380	+	mutL homolog 1
UNG	ENSG00000076248	-0.0914504	5.90587	0.0228356	0.04583	protein_coding	12	109535379	109548797	+	uracil DNA glycosylase
RGS11	ENSG00000076344	-0.845838	0.281288	9.78192e-07	5.41971e-06	protein_coding	16	318300	325980	-	regulator of G protein signaling 11
PLXNA2	ENSG00000076356	0.415135	4.75875	2.60471e-14	4.03987e-13	protein_coding	1	208195587	208417665	-	plexin A2
TRAF4	ENSG00000076604	0.0985239	5.53019	0.0180319	0.0373007	protein_coding	17	27071002	27077974	+	TNF receptor associated factor 4
PAG1	ENSG00000076641	0.195629	3.34118	0.00352207	0.00896037	protein_coding	8	81880045	82024303	-	phosphoprotein membrane anchor with glycosphingolipid microdomains 1
GPATCH1	ENSG00000076650	0.247908	3.58978	7.24858e-05	0.000273198	protein_coding	19	33571786	33621448	+	G-patch domain containing 1
MCAM	ENSG00000076706	0.19289	7.42037	4.286e-08	3.0117e-07	protein_coding	11	119179241	119192231	-	melanoma cell adhesion molecule
MBNL3	ENSG00000076770	0.199918	3.62371	0.00176541	0.00486399	protein_coding	X	131503345	131623996	-	muscleblind like splicing regulator 3
XAB2	ENSG00000076924	0.20716	5.67106	6.67361e-08	4.51666e-07	protein_coding	19	7684411	7694451	-	XPA binding protein 2
DGKD	ENSG00000077044	0.13786	5.65342	0.000485776	0.00153755	protein_coding	2	234263153	234380750	+	diacylglycerol kinase delta
CTTNBP2	ENSG00000077063	-0.379212	2.23804	0.000151229	0.000536796	protein_coding	7	117350705	117514193	-	cortactin binding protein 2
RARB	ENSG00000077092	-0.324547	5.07629	3.31623e-13	4.5586e-12	protein_coding	3	25215823	25639423	+	retinoic acid receptor beta
TOP2B	ENSG00000077097	-0.189011	6.87733	8.48902e-08	5.62949e-07	protein_coding	3	25639475	25706398	-	DNA topoisomerase II beta
TM9SF3	ENSG00000077147	0.0999537	8.27327	0.00566108	0.0135952	protein_coding	10	98277866	98347209	-	transmembrane 9 superfamily member 3
NFKB2	ENSG00000077150	0.213238	5.19762	6.12243e-07	3.51611e-06	protein_coding	10	104153867	104162281	+	nuclear factor kappa B subunit 2
UBE2T	ENSG00000077152	0.208573	6.01505	6.89722e-07	3.92285e-06	protein_coding	1	202300785	202311108	-	ubiquitin conjugating enzyme E2 T
PPP1R12B	ENSG00000077157	0.158941	4.80194	0.00111996	0.00324961	protein_coding	1	202317827	202561834	+	protein phosphatase 1 regulatory subunit 12B
GTF3C1	ENSG00000077235	0.113736	7.61932	0.00168461	0.00466866	protein_coding	16	27470876	27561234	-	general transcription factor IIIC subunit 1
IL4R	ENSG00000077238	0.243749	5.47959	5.73445e-08	3.9433e-07	protein_coding	16	27324989	27376099	+	interleukin 4 receptor
USP33	ENSG00000077254	0.148505	6.08337	3.50986e-05	0.000141163	protein_coding	1	78161672	78225537	-	ubiquitin specific peptidase 33
PAK3	ENSG00000077264	-0.17181	6.24575	4.95485e-05	0.000193235	protein_coding	X	110187513	110470589	+	p21 (RAC1) activated kinase 3
POLD3	ENSG00000077514	0.534944	5.74567	3.05277e-46	2.0661e-44	protein_coding	11	74204896	74380162	+	DNA polymerase delta 3, accessory subunit
CAPZB	ENSG00000077549	-0.19136	7.29204	1.49735e-07	9.53628e-07	protein_coding	1	19665267	19812066	-	capping actin protein of muscle Z-line subunit beta
GPR137B	ENSG00000077585	-0.21571	3.8828	0.00114532	0.00331435	protein_coding	1	236305832	236385165	+	G protein-coupled receptor 137B
UBE2A	ENSG00000077721	0.0937174	6.89295	0.0170982	0.0356297	protein_coding	X	118708501	118718381	+	ubiquitin conjugating enzyme E2 A
MAP2	ENSG00000078018	0.331876	5.30563	5.97008e-17	1.20811e-15	protein_coding	2	210288782	210598842	+	microtubule associated protein 2
AMPH	ENSG00000078053	0.716472	2.80029	5.73167e-21	1.59282e-19	protein_coding	7	38423305	38671167	-	amphiphysin
LAMP3	ENSG00000078081	3.99484	3.15019	1.49951e-275	3.36675e-273	protein_coding	3	182840001	182881627	-	lysosomal associated membrane protein 3
FAP	ENSG00000078098	-0.464388	0.261417	0.0166848	0.0348864	protein_coding	2	163027194	163101661	-	fibroblast activation protein alpha
NEBL	ENSG00000078114	-0.511153	4.07234	3.8122e-12	4.66064e-11	protein_coding	10	21068902	21463116	-	nebulette
UBE2K	ENSG00000078140	0.114684	6.98212	0.00193378	0.00527953	protein_coding	4	39699664	39784412	+	ubiquitin conjugating enzyme E2 K
C12orf5	ENSG00000078237	0.141241	4.22501	0.00492321	0.0120461	protein_coding	12	4430371	4462338	+	TP53 induced glycolysis regulatory phosphatase
SYNJ2	ENSG00000078269	-0.194678	8.80092	1.8111e-09	1.56035e-08	protein_coding	6	158402888	158520208	+	synaptojanin 2
PPP2R5C	ENSG00000078304	-0.227059	6.28484	2.73478e-08	1.98173e-07	protein_coding	14	102228135	102394326	+	protein phosphatase 2 regulatory subunit B'gamma
PMS2P1	ENSG00000078319	-0.248508	3.27082	0.000747571	0.00226432	pseudogene	7	99918615	99939531	-
EDN1	ENSG00000078401	-0.174905	3.91443	0.00551635	0.0132905	protein_coding	6	12290596	12297427	+	endothelin 1
NRD1	ENSG00000078618	0.10511	6.95168	0.0039656	0.00996154	protein_coding	1	52254863	52344477	-	nardilysin convertase
PCM1	ENSG00000078674	0.118221	7.0101	0.00408715	0.0102233	protein_coding	8	17780349	17885478	+	pericentriolar material 1
TP53INP2	ENSG00000078804	-0.603812	6.4913	1.35177e-48	9.56042e-47	protein_coding	20	33292094	33301243	+	tumor protein p53 inducible nuclear protein 2
SDF4	ENSG00000078808	0.115883	8.14002	0.00203053	0.00551496	protein_coding	1	1152288	1167411	-	stromal cell derived factor 4
MYH7B	ENSG00000078814	-0.527523	1.04563	0.000371536	0.00120758	protein_coding	20	33563206	33590240	+	myosin heavy chain 7B
TP73	ENSG00000078900	0.340676	4.05974	2.84564e-07	1.72457e-06	protein_coding	1	3569084	3652765	+	tumor protein p73
TOLLIP	ENSG00000078902	0.0898147	5.81687	0.0230684	0.0462381	protein_coding	11	1295601	1330884	-	toll interacting protein
RUNX1T1	ENSG00000079102	-0.482385	2.31339	1.5556e-06	8.28463e-06	protein_coding	8	92967203	93115514	-	RUNX1 partner transcriptional co-repressor 1
OSBPL6	ENSG00000079156	0.103577	5.66275	0.00977531	0.0219625	protein_coding	2	179059208	179264160	+	oxysterol binding protein like 6
XRCC5	ENSG00000079246	0.0840915	8.73866	0.0165714	0.0346948	protein_coding	2	216972187	217071026	+	X-ray repair cross complementing 5
MKNK1	ENSG00000079277	0.181368	4.77252	6.04666e-05	0.0002316	protein_coding	1	47023090	47082515	-	MAPK interacting serine/threonine kinase 1
REXO1	ENSG00000079313	0.154779	5.30736	0.000330241	0.00108306	protein_coding	19	1815248	1848452	-	RNA exonuclease 1 homolog
SAR1A	ENSG00000079332	0.222939	6.49077	4.92854e-09	3.98367e-08	protein_coding	10	71907045	71930279	-	secretion associated Ras related GTPase 1A
CEACAM1	ENSG00000079385	1.94068	0.767336	6.37087e-34	3.27694e-32	protein_coding	19	43011456	43065386	-	CEA cell adhesion molecule 1
SENP1	ENSG00000079387	0.340428	5.35257	4.48919e-16	8.39941e-15	protein_coding	12	48436681	48500091	-	SUMO specific peptidase 1
CIC	ENSG00000079432	0.149867	7.4965	0.00121512	0.0034878	protein_coding	19	42772689	42799949	+	capicua transcriptional repressor
LIPE	ENSG00000079435	0.256503	2.75727	0.0042715	0.010628	protein_coding	19	42905659	42931578	-	lipase E, hormone sensitive type
FDFT1	ENSG00000079459	-0.091459	6.91467	0.0110354	0.0243975	protein_coding	8	11653082	11696818	+	farnesyl-diphosphate farnesyltransferase 1
KIF22	ENSG00000079616	0.118456	6.68652	0.00457549	0.011311	protein_coding	16	29802040	29816706	+	kinesin family member 22
EPB41L2	ENSG00000079819	0.110783	7.34239	0.00485734	0.0119097	protein_coding	6	131160487	131384462	-	erythrocyte membrane protein band 4.1 like 2
RIMS1	ENSG00000079841	0.520744	0.783805	0.000681855	0.00207953	protein_coding	6	72596406	73112845	+	regulating synaptic membrane exocytosis 1
MOXD1	ENSG00000079931	-0.103996	8.20113	0.00257893	0.00681722	protein_coding	6	132617194	132722684	-	monooxygenase DBH like 1
STX7	ENSG00000079950	-0.0999008	5.62503	0.00697358	0.016372	protein_coding	6	132767006	132834337	-	syntaxin 7
RABL2B	ENSG00000079974	-0.167515	4.39654	0.000567967	0.00176647	protein_coding	22	51205929	51222091	-	RAB, member of RAS oncogene family like 2B
KEAP1	ENSG00000079999	0.105315	6.64879	0.00177047	0.00487414	protein_coding	19	10596796	10614417	-	kelch like ECH associated protein 1
SLC35C2	ENSG00000080189	-0.166361	5.86503	0.000102027	0.00037243	protein_coding	20	44978167	44993043	-	solute carrier family 35 member C2
RFX3	ENSG00000080298	-0.345264	5.62562	5.70358e-11	6.04323e-10	protein_coding	9	3218297	3526004	-	regulatory factor X3
RIF1	ENSG00000080345	0.242587	6.85616	1.11383e-08	8.59059e-08	protein_coding	2	152266397	152364527	+	replication timing regulatory factor 1
SLC4A4	ENSG00000080493	-0.468365	3.66753	4.56758e-09	3.71099e-08	protein_coding	4	72053003	72437804	+	solute carrier family 4 member 4
SMARCA2	ENSG00000080503	0.195288	6.72698	4.60956e-08	3.22145e-07	protein_coding	9	2015342	2193624	+	SWI/SNF related, matrix associated, actin dependent regulator of chromatin, subfamily a, member 2
SESN1	ENSG00000080546	-0.143733	4.08498	0.0154539	0.0327239	protein_coding	6	109307640	109416022	-	sestrin 1
SRCAP	ENSG00000080603	0.25951	7.4426	3.24789e-13	4.47337e-12	protein_coding	16	30709530	30755602	+	Snf2 related CREBBP activator protein
CNOT4	ENSG00000080802	0.192226	5.28625	2.99458e-05	0.000122282	protein_coding	7	135046547	135194875	-	CCR4-NOT transcription complex subunit 4
PSEN1	ENSG00000080815	0.127513	5.55538	0.000743201	0.00225157	protein_coding	14	73603126	73690399	+	presenilin 1
CPOX	ENSG00000080819	0.18712	5.13262	4.69272e-06	2.26935e-05	protein_coding	3	98239976	98312567	-	coproporphyrinogen oxidase
HSP90AA1	ENSG00000080824	0.242157	9.95773	7.36946e-11	7.69875e-10	protein_coding	14	102547075	102606036	-	heat shock protein 90 alpha family class A member 1
RBL1	ENSG00000080839	0.409338	5.62342	9.76852e-19	2.28768e-17	protein_coding	20	35624752	35724398	-	RB transcriptional corepressor like 1
CROCCP3	ENSG00000080947	-0.237905	2.77647	0.00398298	0.00999456	pseudogene	1	16793931	16825752	-
NDC80	ENSG00000080986	0.196845	5.88917	4.15205e-05	0.000164789	protein_coding	18	2571510	2616634	+	NDC80 kinetochore complex component
AP4E1	ENSG00000081014	0.132212	5.16203	0.00121639	0.00349003	protein_coding	15	51200869	51298097	+	adaptor related protein complex 4 subunit epsilon 1
RSBN1	ENSG00000081019	0.148943	4.14491	0.00489783	0.0119965	protein_coding	1	114304454	114355098	-	round spermatid basic protein 1
MAGI3	ENSG00000081026	0.168849	5.55687	4.65487e-05	0.000182796	protein_coding	1	113933371	114228545	+	membrane associated guanylate kinase, WW and PDZ domain containing 3
CXCL2	ENSG00000081041	1.01339	1.7009	1.9667e-16	3.81605e-15	protein_coding	4	74962752	74965010	-	C-X-C motif chemokine ligand 2
COL4A4	ENSG00000081052	0.522257	3.34636	1.33252e-15	2.33853e-14	protein_coding	2	227867427	228028829	-	collagen type IV alpha 4 chain
OSTM1	ENSG00000081087	-0.184493	6.77793	1.78304e-07	1.12443e-06	protein_coding	6	108362613	108487058	-	osteoclastogenesis associated transmembrane protein 1
PCNP	ENSG00000081154	-0.114062	7.22471	0.00174796	0.00482248	protein_coding	3	101292939	101313281	+	PEST proteolytic signal containing nuclear protein
STK17B	ENSG00000081320	-0.24877	4.53122	1.0279e-07	6.74066e-07	protein_coding	2	196998290	197041227	-	serine/threonine kinase 17b
CADPS2	ENSG00000081803	0.197678	4.65157	7.34842e-05	0.000276592	protein_coding	7	121958481	122526813	-	calcium dependent secretion activator 2
PCDHGA2	ENSG00000081853	-0.891561	0.1446	6.51124e-07	3.7273e-06	protein_coding	5	140718539	140892546	+	protocadherin gamma subfamily A, 2
PHLPP1	ENSG00000081913	0.130825	5.52578	0.00163532	0.00454419	protein_coding	18	60382672	60647666	+	PH domain and leucine rich repeat protein phosphatase 1
SMARCD3	ENSG00000082014	-0.172403	4.78143	0.00430016	0.0106918	protein_coding	7	150935850	150974982	-	SWI/SNF related, matrix associated, actin dependent regulator of chromatin, subfamily d, member 3
WDR70	ENSG00000082068	-0.163549	4.17865	0.0125559	0.0273151	protein_coding	5	37379314	37753537	+	WD repeat domain 70
STRADB	ENSG00000082146	-0.110836	5.54345	0.00597658	0.0142681	protein_coding	2	202252581	202345569	+	STE20 related adaptor beta
BZW1	ENSG00000082153	-0.089883	7.55404	0.00720749	0.0168624	protein_coding	2	201675317	201688569	+	basic leucine zipper and W2 domains 1
PGR	ENSG00000082175	0.713834	0.431677	4.05093e-05	0.000161047	protein_coding	11	100900355	101001255	-	progesterone receptor
ME2	ENSG00000082212	0.14348	6.83798	0.000371893	0.00120791	protein_coding	18	48405419	48474691	+	malic enzyme 2
COL19A1	ENSG00000082293	0.201081	2.75779	0.0193413	0.039621	protein_coding	6	70576463	70919679	+	collagen type XIX alpha 1 chain
SERTAD4	ENSG00000082497	-0.170168	5.65186	5.32348e-05	0.000206586	protein_coding	1	210406144	210419976	+	SERTA domain containing 4
NFE2L1	ENSG00000082641	0.167305	8.92744	8.75107e-07	4.88107e-06	protein_coding	17	46125691	46138849	+	nuclear factor, erythroid 2 like 1
SEMA5B	ENSG00000082684	-1.4585	2.20652	6.01786e-30	2.63538e-28	protein_coding	3	122628041	122747452	-	semaphorin 5B
GSK3B	ENSG00000082701	-0.137821	6.22513	0.000503266	0.00158546	protein_coding	3	119540170	119813264	-	glycogen synthase kinase 3 beta
ITGB5	ENSG00000082781	-0.102863	8.36283	0.00821352	0.0188543	protein_coding	3	124480795	124620265	-	integrin subunit beta 5
XPO1	ENSG00000082898	0.343232	8.4221	1.05388e-20	2.88339e-19	protein_coding	2	61704984	61765761	-	exportin 1
PALB2	ENSG00000083093	0.258909	4.40113	2.96486e-05	0.000121138	protein_coding	16	23614488	23652631	-	partner and localizer of BRCA2
DOPEY1	ENSG00000083097	0.183763	4.20788	0.00148357	0.00417009	protein_coding	6	83777385	83881069	+	DOP1 leucine zipper like protein A
BCKDHB	ENSG00000083123	-0.218416	4.92278	8.84668e-06	4.02109e-05	protein_coding	6	80816364	81055987	+	branched chain keto acid dehydrogenase E1 subunit beta
KAT6A	ENSG00000083168	0.181691	6.41899	6.88006e-08	4.64305e-07	protein_coding	8	41786997	41909508	-	lysine acetyltransferase 6A
ULK2	ENSG00000083290	0.184623	4.78983	5.78336e-05	0.000222721	protein_coding	17	19674142	19771249	-	unc-51 like autophagy activating kinase 2
TNPO1	ENSG00000083312	-0.0894654	7.75984	0.00939688	0.0212059	protein_coding	5	72112139	72212560	+	transportin 1
PLOD1	ENSG00000083444	0.20747	8.54543	1.86319e-09	1.60407e-08	protein_coding	1	11994262	12035595	+	procollagen-lysine,2-oxoglutarate 5-dioxygenase 1
ITGAE	ENSG00000083457	-0.268488	4.26314	8.25949e-08	5.49016e-07	protein_coding	17	3617922	3704537	-	integrin subunit alpha E
PDS5B	ENSG00000083642	0.288655	5.38684	9.36203e-10	8.4294e-09	protein_coding	13	33160564	33352157	+	PDS5 cohesin associated factor B
OXCT1	ENSG00000083720	-0.15017	6.11049	0.000186195	0.000647268	protein_coding	5	41730167	41870621	-	3-oxoacid CoA-transferase 1
RRAGB	ENSG00000083750	-0.375942	3.47745	2.40393e-07	1.47393e-06	protein_coding	X	55744172	55785207	+	Ras related GTP binding B
ZNF416	ENSG00000083817	-0.333466	2.7002	2.11883e-05	8.95988e-05	protein_coding	19	58082934	58090295	-	zinc finger protein 416
ZNF446	ENSG00000083838	-0.284194	2.85293	0.000391778	0.00126235	protein_coding	19	58985384	58992597	+	zinc finger protein 446
RPS5	ENSG00000083845	-0.228923	7.70762	8.37075e-10	7.58983e-09	protein_coding	19	58897767	58906173	+	ribosomal protein S5
FAT1	ENSG00000083857	-0.136442	8.69287	0.000183612	0.000639388	protein_coding	4	187508937	187647876	-	FAT atypical cadherin 1
YTHDC1	ENSG00000083896	0.104079	5.96822	0.00780221	0.0180389	protein_coding	4	69176105	69215807	-	YTH domain containing 1
CHMP2B	ENSG00000083937	0.0991961	5.82052	0.00610281	0.0145352	protein_coding	3	87276421	87304698	+	charged multivesicular body protein 2B
STARD7	ENSG00000084090	0.143056	6.61416	6.03853e-05	0.000231351	protein_coding	2	96850597	96874563	-	StAR related lipid transfer domain containing 7
REST	ENSG00000084093	0.0960593	5.26584	0.0148993	0.0316489	protein_coding	4	57774075	57802010	+	RE1 silencing transcription factor
SSH1	ENSG00000084112	0.245104	6.95138	3.28791e-11	3.59409e-10	protein_coding	12	109176466	109251366	-	slingshot protein phosphatase 1
GSTP1	ENSG00000084207	-0.213971	8.406	1.37125e-08	1.03891e-07	protein_coding	11	67351066	67354131	+	glutathione S-transferase pi 1
KIAA1467	ENSG00000084444	0.338187	3.19273	2.14797e-05	9.0777e-05	protein_coding	12	13197218	13295455	+	family with sequence similarity 234 member B
WBP11	ENSG00000084463	0.214183	6.89598	6.42445e-08	4.36894e-07	protein_coding	12	14939410	14956474	-	WW domain binding protein 11
EIF3I	ENSG00000084623	-0.156737	7.66525	9.5685e-05	0.000351732	protein_coding	1	32687529	32697205	+	eukaryotic translation initiation factor 3 subunit I
TXLNA	ENSG00000084652	0.220798	6.49969	9.51703e-11	9.75495e-10	protein_coding	1	32645287	32663886	+	taxilin alpha
AGBL5	ENSG00000084693	-0.362359	5.70481	1.18991e-20	3.23058e-19	protein_coding	2	27265232	27293490	+	ATP/GTP binding protein like 5
GCKR	ENSG00000084734	-0.37372	0.68849	0.0189352	0.038909	protein_coding	2	27719709	27746554	+	glucokinase regulator
HADHA	ENSG00000084754	-0.13913	7.7647	1.52711e-05	6.62198e-05	protein_coding	2	26413504	26467594	-	hydroxyacyl-CoA dehydrogenase trifunctional multienzyme complex subunit alpha
MAPRE3	ENSG00000084764	-0.0974527	5.33804	0.0227501	0.0456724	protein_coding	2	27193480	27250064	+	microtubule associated protein RP/EB family member 3
CAD	ENSG00000084774	0.0924876	6.31563	0.0205295	0.0417768	protein_coding	2	27440258	27466811	+	carbamoyl-phosphate synthetase 2, aspartate transcarbamylase, and dihydroorotase
CD82	ENSG00000085117	0.324193	6.61105	4.49117e-19	1.09342e-17	protein_coding	11	44585977	44641913	+	CD82 molecule
BCORL1	ENSG00000085185	0.345854	4.13455	9.10425e-10	8.21299e-09	protein_coding	X	129115083	129192058	+	BCL6 corepressor like 1
ATRX	ENSG00000085224	-0.198318	6.97699	4.78043e-05	0.000187104	protein_coding	X	76760356	77041702	-	ATRX chromatin remodeler
WDFY1	ENSG00000085449	0.219637	7.13039	3.69505e-09	3.05116e-08	protein_coding	2	224720433	224810104	-	WD repeat and FYVE domain containing 1
SLC25A24	ENSG00000085491	0.211597	5.57679	2.33424e-06	1.2024e-05	protein_coding	1	108676658	108743471	-	solute carrier family 25 member 24
MAP3K4	ENSG00000085511	-0.102804	6.44199	0.00232629	0.00622266	protein_coding	6	161412759	161538417	+	mitogen-activated protein kinase kinase kinase 4
ABCB1	ENSG00000085563	-0.207843	3.41549	0.00232535	0.00622131	protein_coding	7	87133175	87342611	-	ATP binding cassette subfamily B member 1
AKR1B1	ENSG00000085662	-0.132137	9.12879	0.00029988	0.00099177	protein_coding	7	134127102	134144036	-	aldo-keto reductase family 1 member B
CPNE3	ENSG00000085719	-0.182305	7.09996	1.8941e-07	1.18753e-06	protein_coding	8	87497059	87573726	+	copine 3
RRN3	ENSG00000085721	0.184965	5.67544	4.61641e-05	0.000181387	protein_coding	16	15153879	15188174	-	RRN3 homolog, RNA polymerase I transcription factor
ORC1	ENSG00000085840	0.424819	5.1772	7.27693e-21	2.01039e-19	protein_coding	1	52838501	52870131	-	origin recognition complex subunit 1
ATG16L1	ENSG00000085978	0.227282	5.48381	1.37868e-08	1.04397e-07	protein_coding	2	234118697	234204320	+	autophagy related 16 like 1
POMGNT1	ENSG00000085998	-0.20224	7.10878	1.88052e-07	1.18065e-06	protein_coding	1	46654354	46685977	-	protein O-linked mannose N-acetylglucosaminyltransferase 1 (beta 1,2-)
RAD54L	ENSG00000085999	0.4953	4.50117	8.09344e-18	1.75317e-16	protein_coding	1	46713360	46744145	+	RAD54 like
MAST2	ENSG00000086015	0.158345	7.01158	0.00010035	0.000367161	protein_coding	1	46252659	46501796	+	microtubule associated serine/threonine kinase 2
DNAJA1	ENSG00000086061	0.489042	8.2615	2.78907e-37	1.55321e-35	protein_coding	9	33025209	33039905	+	DnaJ heat shock protein family (Hsp40) member A1
B4GALT1	ENSG00000086062	0.152206	8.12961	2.24734e-05	9.4609e-05	protein_coding	9	33104080	33167354	-	beta-1,4-galactosyltransferase 1
CHMP5	ENSG00000086065	0.651917	6.90461	2.92663e-69	2.62008e-67	protein_coding	9	33264940	33281977	+	charged multivesicular body protein 5
NFX1	ENSG00000086102	0.0977325	5.90004	0.0234788	0.046961	protein_coding	9	33290509	33371155	+	nuclear transcription factor, X-box binding 1
IPO11	ENSG00000086200	0.1476	4.95901	0.00102099	0.00299313	protein_coding	5	61699799	61924409	+	importin 11
EPDR1	ENSG00000086289	0.139183	7.44822	0.000760148	0.00229996	protein_coding	7	37723446	37991543	+	ependymin related 1
SNX10	ENSG00000086300	0.28973	3.02323	0.000291826	0.000968304	protein_coding	7	26331541	26413949	+	sorting nexin 10
SEPHS1	ENSG00000086475	-0.185698	5.82634	1.14685e-05	5.09813e-05	protein_coding	10	13359424	13390297	-	selenophosphate synthetase 1
MRPL28	ENSG00000086504	-0.130156	6.23224	0.000285572	0.000949332	protein_coding	16	417384	420527	-	mitochondrial ribosomal protein L28
ITPKC	ENSG00000086544	0.157721	4.06115	0.00269678	0.00710088	protein_coding	19	41223008	41246765	+	inositol-trisphosphate 3-kinase C
RBM22	ENSG00000086589	0.112821	5.77668	0.0026607	0.00700979	protein_coding	5	150070356	150080669	-	RNA binding motif protein 22
ERO1LB	ENSG00000086619	-0.246342	3.70962	0.000522015	0.00163941	protein_coding	1	236378855	236445319	-	endoplasmic reticulum oxidoreductase 1 beta
TXLNG	ENSG00000086712	0.103486	5.66832	0.00641993	0.0151907	protein_coding	X	16804550	16862642	+	taxilin gamma
LAT2	ENSG00000086730	0.289659	2.57238	0.00206548	0.0056002	protein_coding	7	73613982	73644161	+	linker for activation of T cells family member 2
ZW10	ENSG00000086827	0.207135	4.57976	0.00140204	0.00396138	protein_coding	11	113603909	113644533	-	zw10 kinetochore protein
ACOX3	ENSG00000087008	-0.212686	4.91171	4.38474e-06	2.13575e-05	protein_coding	4	8368009	8442450	-	acyl-CoA oxidase 3, pristanoyl
MTMR2	ENSG00000087053	-0.163665	5.13561	0.000231821	0.000788247	protein_coding	11	95566046	95658479	-	myotubularin related protein 2
HSD17B14	ENSG00000087076	-1.06546	2.2598	3.4942e-14	5.31457e-13	protein_coding	19	49316274	49339935	-	hydroxysteroid 17-beta dehydrogenase 14
FTL	ENSG00000087086	-0.231952	8.40991	3.90137e-06	1.92215e-05	protein_coding	19	49468558	49470135	+	ferritin light chain
BAX	ENSG00000087088	-0.118399	6.54112	0.000870953	0.00259361	protein_coding	19	49458072	49465055	+	BCL2 associated X, apoptosis regulator
PIGS	ENSG00000087111	-0.099352	6.45543	0.0243965	0.0486041	protein_coding	17	26880401	26898890	-	phosphatidylinositol glycan anchor biosynthesis class S
ATXN7L3	ENSG00000087152	0.105616	6.58341	0.00783079	0.0181021	protein_coding	17	42269173	42277481	-	ataxin 7 like 3
LPCAT2	ENSG00000087253	-0.122446	7.556	0.00271131	0.00713401	protein_coding	16	55542910	55620582	+	lysophosphatidylcholine acyltransferase 2
OGFOD1	ENSG00000087263	0.181593	5.63705	1.82386e-06	9.58697e-06	protein_coding	16	56485402	56513012	+	2-oxoglutarate and iron dependent oxygenase domain containing 1
NOP14	ENSG00000087269	0.120765	5.65217	0.00126731	0.00362143	protein_coding	4	2939660	2965112	-	NOP14 nucleolar protein
L2HGDH	ENSG00000087299	0.484428	2.87352	4.43142e-06	2.15626e-05	protein_coding	14	50704281	50779266	-	L-2-hydroxyglutarate dehydrogenase
NID2	ENSG00000087303	0.281155	4.66078	2.16855e-07	1.343e-06	protein_coding	14	52471521	52535712	-	nidogen 2
GMCL1	ENSG00000087338	0.176117	4.81282	0.000311474	0.00102747	protein_coding	2	70056774	70108528	+	germ cell-less 1, spermatogenesis associated
SF3B2	ENSG00000087365	0.152439	8.17676	2.99035e-06	1.50368e-05	protein_coding	11	65818200	65836779	+	splicing factor 3b subunit 2
KLHL42	ENSG00000087448	0.243504	5.70575	7.52356e-11	7.84814e-10	protein_coding	12	27932953	27955973	+	kelch like family member 42
DNM1L	ENSG00000087470	0.15983	7.2126	2.25459e-06	1.16349e-05	protein_coding	12	32832134	32898486	+	dynamin 1 like
CASS4	ENSG00000087589	-0.684169	0.473415	4.35867e-05	0.000172072	protein_coding	20	54987168	55034396	+	Cas scaffold protein family member 4
PIR	ENSG00000087842	0.118325	5.3717	0.00513966	0.0125151	protein_coding	X	15402921	15511687	-	pirin
AAMDC	ENSG00000087884	-0.325379	1.82347	0.00137318	0.00388938	protein_coding	11	77532155	77629478	+	adipogenesis associated Mth938 domain containing
PTPN4	ENSG00000088179	0.129602	4.47629	0.0155874	0.0329621	protein_coding	2	120517207	120741394	+	protein tyrosine phosphatase non-receptor type 4
KHSRP	ENSG00000088247	0.150368	8.14815	5.82859e-06	2.76107e-05	protein_coding	19	6413359	6424805	-	KH-type splicing regulatory protein
GNA11	ENSG00000088256	0.193439	6.7709	3.36202e-07	2.01507e-06	protein_coding	19	3094408	3124002	+	G protein subunit alpha 11
FER1L4	ENSG00000088340	-0.985798	1.86584	3.31371e-15	5.5668e-14	pseudogene	20	34146507	34195484	-
EPB41L1	ENSG00000088367	-0.221703	5.10157	1.47163e-06	7.88495e-06	protein_coding	20	34679426	34820721	+	erythrocyte membrane protein band 4.1 like 1
SLC15A1	ENSG00000088386	-0.37944	3.01068	6.98692e-06	3.23139e-05	protein_coding	13	99336055	99404908	-	solute carrier family 15 member 1
TGDS	ENSG00000088451	0.241025	3.74521	4.30581e-05	0.000170175	protein_coding	13	95226308	95248511	-	TDP-glucose 4,6-dehydratase
CRLS1	ENSG00000088766	-0.175721	5.49109	2.93133e-06	1.47873e-05	protein_coding	20	5986736	6020699	+	cardiolipin synthase 1
PPP1R13B	ENSG00000088808	0.173983	3.51977	0.00394889	0.00992662	protein_coding	14	104200089	104313927	-	protein phosphatase 1 regulatory subunit 13B
ATRN	ENSG00000088812	-0.141538	6.8926	2.06478e-05	8.74963e-05	protein_coding	20	3451687	3631769	+	attractin
FKBP1A	ENSG00000088832	-0.183395	8.70672	1.96069e-07	1.225e-06	protein_coding	20	1349622	1373806	-	FKBP prolyl isomerase 1A
SLC4A11	ENSG00000088836	-0.158837	3.83167	0.0228554	0.0458566	protein_coding	20	3208063	3219836	-	solute carrier family 4 member 11
C20orf194	ENSG00000088854	-0.166529	4.1574	0.00439829	0.0109147	protein_coding	20	3229951	3388272	-	chromosome 20 open reading frame 194
EBF4	ENSG00000088881	-0.315962	4.68002	4.66381e-10	4.36596e-09	protein_coding	20	2673524	2740753	+	EBF family member 4
LZTS3	ENSG00000088899	-0.63399	3.10933	5.3413e-14	7.99499e-13	protein_coding	20	3143263	3154192	-	leucine zipper tumor suppressor family member 3
PLK1S1	ENSG00000088970	-0.396575	2.93045	4.69547e-06	2.2699e-05	processed_transcript	20	21106624	21227260	+	kizuna centrosomal protein
RPL6	ENSG00000089009	-0.268729	8.80765	1.27459e-15	2.23963e-14	protein_coding	12	112842994	112856642	-	ribosomal protein L6
ESF1	ENSG00000089048	0.136065	4.93195	0.00577058	0.0138371	protein_coding	20	13694969	13765532	-	ESF1 nucleolar pre-rRNA processing protein homolog
ANAPC5	ENSG00000089053	-0.161572	7.05227	4.47019e-06	2.17213e-05	protein_coding	12	121746048	121837699	-	anaphase promoting complex subunit 5
SLC23A2	ENSG00000089057	-0.294756	6.17789	3.57851e-16	6.72217e-15	protein_coding	20	4833002	4990939	-	solute carrier family 23 member 2
SLC8B1	ENSG00000089060	0.204165	3.98727	0.00536509	0.0129862	protein_coding	12	113736564	113797298	-	solute carrier family 8 member B1
TMEM230	ENSG00000089063	-0.190164	7.12711	5.44943e-06	2.60061e-05	protein_coding	20	5080486	5093749	-	transmembrane protein 230
KDM2B	ENSG00000089094	0.124692	5.19256	0.00871867	0.0198432	protein_coding	12	121866900	122018920	-	lysine demethylase 2B
OAS1	ENSG00000089127	4.12901	7.35833	0	0	protein_coding	12	113344582	113369990	+	2'-5'-oligoadenylate synthetase 1
GCN1L1	ENSG00000089154	0.169708	7.79035	1.08066e-05	4.82208e-05	protein_coding	12	120565007	120632513	-	GCN1 activator of EIF2AK4
RPLP0	ENSG00000089157	-0.457056	9.99728	1.13093e-32	5.53531e-31	protein_coding	12	120634489	120639038	-	ribosomal protein lateral stalk subunit P0
KIF16B	ENSG00000089177	0.195671	3.77137	0.00169476	0.00469128	protein_coding	20	16252749	16554078	-	kinesin family member 16B
CHGB	ENSG00000089199	-0.406186	1.07563	0.00485479	0.0119055	protein_coding	20	5892076	5906007	+	chromogranin B
PEBP1	ENSG00000089220	-0.122854	8.37268	0.000396857	0.00127697	protein_coding	12	118573663	118583389	+	phosphatidylethanolamine binding protein 1
TBX5	ENSG00000089225	0.368046	2.04834	0.00120548	0.00346436	protein_coding	12	114791736	114846247	-	T-box transcription factor 5
BRAP	ENSG00000089234	0.112154	5.03256	0.0107098	0.0237856	protein_coding	12	112079950	112123790	-	BRCA1 associated protein
ERP29	ENSG00000089248	0.148732	7.26007	5.19997e-06	2.49081e-05	protein_coding	12	112451120	112461255	+	endoplasmic reticulum protein 29
FUS	ENSG00000089280	0.0997988	7.93303	0.0106798	0.0237281	protein_coding	16	31191431	31203127	+	FUS RNA binding protein
IGBP1	ENSG00000089289	-0.181668	4.78331	0.00358145	0.00909018	protein_coding	X	69353299	69386174	+	immunoglobulin binding protein 1
FXYD5	ENSG00000089327	0.38443	7.25503	6.85472e-17	1.37727e-15	protein_coding	19	35645633	35660786	+	FXYD domain containing ion transport regulator 5
ZNF302	ENSG00000089335	-0.110847	5.23996	0.0141145	0.0301906	protein_coding	19	35168544	35177302	+	zinc finger protein 302
CMTM1	ENSG00000089505	0.301794	1.6028	0.010137	0.0226556	protein_coding	16	66600294	66613040	+	CKLF like MARVEL transmembrane domain containing 1
GANAB	ENSG00000089597	0.102078	9.76727	0.00404348	0.0101266	protein_coding	11	62392298	62414104	-	glucosidase II alpha subunit
RBM41	ENSG00000089682	0.25551	4.09833	3.49219e-05	0.000140532	protein_coding	X	106307650	106362057	-	RNA binding motif protein 41
LAG3	ENSG00000089692	-0.545909	1.1874	0.00142335	0.00401541	protein_coding	12	6881678	6887621	+	lymphocyte activating 3
MLF2	ENSG00000089693	-0.153289	8.25631	4.42123e-05	0.000174347	protein_coding	12	6857170	6876641	-	myeloid leukemia factor 2
DDX24	ENSG00000089737	0.24355	6.80618	5.41395e-09	4.35611e-08	protein_coding	14	94517266	94547591	-	DEAD-box helicase 24
NECAP1	ENSG00000089818	0.145737	5.61203	0.000154176	0.000545478	protein_coding	12	8234807	8250367	+	NECAP endocytosis associated 1
ARHGAP4	ENSG00000089820	-0.679564	0.780684	1.81119e-05	7.7634e-05	protein_coding	X	153172821	153200452	-	Rho GTPase activating protein 4
RCOR1	ENSG00000089902	0.179303	5.18592	5.36061e-05	0.000207856	protein_coding	14	103058998	103196913	+	REST corepressor 1
SLC9A1	ENSG00000090020	0.294532	6.39799	9.81456e-10	8.79765e-09	protein_coding	1	27425306	27493472	-	solute carrier family 9 member A1
SPTLC1	ENSG00000090054	0.0961165	6.3162	0.0229474	0.0460348	protein_coding	9	94794281	94877666	-	serine palmitoyltransferase long chain base subunit 1
CCNK	ENSG00000090061	0.123436	5.24492	0.00252796	0.00670329	protein_coding	14	99947506	100001381	+	cyclin K
PCBP4	ENSG00000090097	-0.220407	4.95955	5.80102e-07	3.34783e-06	protein_coding	3	51991470	52002426	-	poly(rC) binding protein 4
YPEL3	ENSG00000090238	-0.321078	4.19979	6.38777e-05	0.000243753	protein_coding	16	30103635	30108236	-	yippee like 3
MRPS33	ENSG00000090263	-0.137028	4.72829	0.00261388	0.00689543	protein_coding	7	140705854	140715028	-	mitochondrial ribosomal protein S33
NDUFB2	ENSG00000090266	-0.284193	5.52003	1.29465e-10	1.30526e-09	protein_coding	7	140390577	140422590	+	NADH:ubiquinone oxidoreductase subunit B2
NUDC	ENSG00000090273	0.114444	7.14933	0.000887046	0.00263543	protein_coding	1	27226729	27273353	+	nuclear distribution C, dynein complex regulator
ICAM1	ENSG00000090339	0.696127	1.8402	4.57645e-08	3.20148e-07	protein_coding	19	10381511	10397291	+	intercellular adhesion molecule 1
PDCD7	ENSG00000090470	0.209356	4.86635	1.23905e-05	5.47698e-05	protein_coding	15	65409717	65426174	-	programmed cell death 7
SPG21	ENSG00000090487	-0.110613	5.89264	0.00830609	0.0190359	protein_coding	15	65255362	65282648	-	SPG21 abhydrolase domain containing, maspardin
DNAJB11	ENSG00000090520	0.190826	7.18281	5.24188e-06	2.50749e-05	protein_coding	3	186285192	186315061	+	DnaJ heat shock protein family (Hsp40) member B11
CHRD	ENSG00000090539	-0.169054	3.68016	0.00367637	0.00930939	protein_coding	3	184097861	184108524	+	chordin
RAB11FIP3	ENSG00000090565	0.110661	6.18076	0.00427391	0.0106321	protein_coding	16	475619	573011	+	RAB11 family interacting protein 3
GNPTG	ENSG00000090581	-0.148984	4.98995	0.0046228	0.0114138	protein_coding	16	1401924	1413352	+	N-acetylglucosamine-1-phosphate transferase subunit gamma
GOLGA3	ENSG00000090615	0.114762	6.72791	0.00168662	0.00467239	protein_coding	12	133345495	133405444	-	golgin A3
CERS4	ENSG00000090661	-0.430499	3.5737	6.71225e-08	4.54064e-07	protein_coding	19	8271620	8327305	+	ceramide synthase 4
USP48	ENSG00000090686	0.170216	6.22419	3.55659e-06	1.76025e-05	protein_coding	1	22004791	22110099	-	ubiquitin specific peptidase 48
EFNB1	ENSG00000090776	0.155395	3.32104	0.0244404	0.0486777	protein_coding	X	68048840	68061990	+	ephrin B1
AARS	ENSG00000090861	0.135725	7.21656	3.83701e-05	0.000153274	protein_coding	16	70286198	70323446	-	alanyl-tRNA synthetase 1
GLG1	ENSG00000090863	0.121627	7.93692	0.000172341	0.000602811	protein_coding	16	74485856	74641012	-	golgi glycoprotein 1
KIF4A	ENSG00000090889	0.12301	6.9007	0.00289817	0.00754688	protein_coding	X	69509879	69640682	+	kinesin family member 4A
PLEKHG2	ENSG00000090924	-0.0998864	5.88979	0.0117708	0.0258217	protein_coding	19	39903225	39919054	+	pleckstrin homology and RhoGEF domain containing G2
NAT14	ENSG00000090971	-0.10778	5.55548	0.0171964	0.0357868	protein_coding	19	55996371	55998935	+	N-acetyltransferase 14 (putative)
RBM27	ENSG00000091009	0.236138	5.43143	6.85934e-08	4.63128e-07	protein_coding	5	145583113	145718814	+	RNA binding motif protein 27
DTX2	ENSG00000091073	0.524292	5.60531	1.34424e-28	5.57605e-27	protein_coding	7	76090993	76135312	+	deltex E3 ubiquitin ligase 2
NRCAM	ENSG00000091129	0.117143	9.8619	0.000347169	0.00113359	protein_coding	7	107788068	108097161	-	neuronal cell adhesion molecule
LAMB1	ENSG00000091136	0.240758	8.75256	7.58629e-11	7.90192e-10	protein_coding	7	107564244	107643700	-	laminin subunit beta 1
DLD	ENSG00000091140	-0.100988	7.40667	0.00195227	0.00532489	protein_coding	7	107531415	107572175	+	dihydrolipoamide dehydrogenase
ABCC6	ENSG00000091262	-0.458587	0.544411	0.00374385	0.00946671	protein_coding	16	16242785	16317379	-	ATP binding cassette subfamily C member 6
CMTM6	ENSG00000091317	-0.0841408	6.58136	0.0130907	0.0283001	protein_coding	3	32522804	32544900	-	CKLF like MARVEL transmembrane domain containing 6
ITGA6	ENSG00000091409	0.084953	7.72899	0.0123272	0.0268797	protein_coding	2	173292082	173371181	+	integrin subunit alpha 6
RAPGEF4	ENSG00000091428	-0.355014	2.21239	0.00227419	0.0061006	protein_coding	2	173600002	173917621	+	Rap guanine nucleotide exchange factor 4
MLTK	ENSG00000091436	-0.125861	6.10396	0.000312378	0.00102994	protein_coding	2	173940163	174132738	+	mitogen-activated protein kinase kinase kinase 20
SEL1L3	ENSG00000091490	-0.170267	6.61474	3.99142e-05	0.000158815	protein_coding	4	25749055	25865382	-	SEL1L family member 3
ALKBH5	ENSG00000091542	0.171161	6.66026	1.47476e-06	7.89632e-06	protein_coding	17	18086392	18113268	+	alkB homolog 5, RNA demethylase
NLRP1	ENSG00000091592	-0.758264	5.48728	1.34477e-32	6.55924e-31	protein_coding	17	5402747	5522744	-	NLR family pyrin domain containing 1
SPAG7	ENSG00000091640	-0.127824	5.57873	0.00456793	0.0113	protein_coding	17	4862521	4871167	-	sperm associated antigen 7
ORC6	ENSG00000091651	0.486254	5.60658	7.52037e-21	2.0736e-19	protein_coding	16	46723555	46732306	+	origin recognition complex subunit 6
ZC3HC1	ENSG00000091732	0.162857	5.01747	0.000763621	0.00230898	protein_coding	7	129658126	129691291	-	zinc finger C3HC-type containing 1
ESR1	ENSG00000091831	-0.361546	0.618212	0.0241622	0.0482051	protein_coding	6	151977826	152450754	+	estrogen receptor 1
CCDC80	ENSG00000091986	0.327238	7.17211	5.71741e-16	1.05578e-14	protein_coding	3	112323407	112368377	-	coiled-coil domain containing 80
PSME1	ENSG00000092010	0.71034	6.26287	9.87631e-83	9.9786e-81	protein_coding	14	24605367	24608176	+	proteasome activator subunit 1
SLC7A8	ENSG00000092068	-0.159527	4.18442	0.00300865	0.00781299	protein_coding	14	23594504	23652883	-	solute carrier family 7 member 8
OSGEP	ENSG00000092094	-0.186318	3.69197	0.0134801	0.0290621	protein_coding	14	20914570	20923264	-	O-sialoglycoprotein endopeptidase
SLC22A17	ENSG00000092096	-0.319493	3.10523	0.000127583	0.000458735	protein_coding	14	23815515	23822121	-	solute carrier family 22 member 17
RNF31	ENSG00000092098	0.625112	4.02543	2.16308e-28	8.92034e-27	protein_coding	14	24615892	24629870	+	ring finger protein 31
SUPT16H	ENSG00000092201	0.168267	7.04274	5.73346e-06	2.72421e-05	protein_coding	14	21819631	21852425	-	SPT16 homolog, facilitates chromatin remodeling subunit
GEMIN2	ENSG00000092208	0.276994	1.95844	0.00459769	0.0113557	protein_coding	14	39583427	39606177	+	gem nuclear organelle associated protein 2
TINF2	ENSG00000092330	-0.131933	4.54038	0.00725401	0.0169544	protein_coding	14	24708849	24711880	-	TERF1 interacting nuclear factor 2
SEMA6A	ENSG00000092421	-0.358724	0.849072	0.0124824	0.0271845	protein_coding	5	115779312	115910630	-	semaphorin 6A
WDR76	ENSG00000092470	0.243057	5.21741	4.60755e-07	2.6898e-06	protein_coding	15	44119161	44160617	+	WD repeat domain 76
TBX15	ENSG00000092607	0.476305	3.25308	2.06509e-11	2.32754e-10	protein_coding	1	119425669	119532179	-	T-box transcription factor 15
PHGDH	ENSG00000092621	0.127599	6.38048	0.00302186	0.0078401	protein_coding	1	120202421	120286838	+	phosphoglycerate dehydrogenase
COL9A3	ENSG00000092758	0.197493	3.39973	0.00975035	0.0219197	protein_coding	20	61447596	61472511	+	collagen type IX alpha 3 chain
MYL6	ENSG00000092841	-0.243017	8.97498	9.66846e-11	9.903e-10	protein_coding	12	56551945	56557280	+	myosin light chain 6
AGO1	ENSG00000092847	-0.144728	5.56841	0.000111591	0.00040494	protein_coding	1	36335409	36395211	+	argonaute RISC component 1
CLSPN	ENSG00000092853	0.646786	4.86743	9.2662e-30	4.02057e-28	protein_coding	1	36185819	36235568	-	claspin
UNC13D	ENSG00000092929	-0.390915	0.490702	0.016473	0.0345047	protein_coding	17	73823306	73840798	-	unc-13 homolog D
TGFB2	ENSG00000092969	-0.137805	7.67247	0.000219738	0.00075259	protein_coding	1	218519577	218617961	+	transforming growth factor beta 2
NUP50	ENSG00000093000	0.169578	7.27171	6.486e-06	3.02987e-05	protein_coding	22	45559722	45583896	+	nucleoporin 50
CDC45	ENSG00000093009	0.239627	5.73448	1.50395e-06	8.02771e-06	protein_coding	22	19466982	19508135	+	cell division cycle 45
CECR1	ENSG00000093072	-0.297181	3.17988	0.00311827	0.00805478	protein_coding	22	17660194	17702879	-	adenosine deaminase 2
SEC22C	ENSG00000093183	0.0970072	5.99238	0.00739077	0.0172285	protein_coding	3	42589461	42642572	-	SEC22 homolog C, vesicle trafficking protein
XYLB	ENSG00000093217	0.245405	2.87388	0.00546706	0.0131988	protein_coding	3	38388251	38462839	+	xylulokinase
CDC6	ENSG00000094804	0.309864	5.9084	8.99704e-15	1.4561e-13	protein_coding	17	38443885	38459171	+	cell division cycle 6
CDC23	ENSG00000094880	0.22338	5.38911	6.7735e-08	4.57769e-07	protein_coding	5	137523339	137549032	-	cell division cycle 23
AAAS	ENSG00000094914	-0.118595	6.68548	0.00866642	0.0197434	protein_coding	12	53701240	53718648	-	aladin WD repeat nucleoporin
CBX5	ENSG00000094916	-0.0880586	7.64884	0.00642351	0.0151966	protein_coding	12	54624724	54673886	-	chromobox 5
SUCO	ENSG00000094975	0.293607	5.93604	8.21705e-14	1.20446e-12	protein_coding	1	172501489	172580971	+	SUN domain containing ossification factor
MSH2	ENSG00000095002	0.423139	5.57036	6.51506e-24	2.22061e-22	protein_coding	2	47630108	47789450	+	mutS homolog 2
DHPS	ENSG00000095059	-0.104123	5.35199	0.0171877	0.0357792	protein_coding	19	12786531	12792716	-	deoxyhypusine synthase
TMEM38B	ENSG00000095209	0.171202	5.67296	1.68179e-05	7.24609e-05	protein_coding	9	108456825	108538893	+	transmembrane protein 38B
PSMD5	ENSG00000095261	0.278148	5.25733	5.34556e-12	6.43515e-11	protein_coding	9	123577774	123605262	-	proteasome 26S subunit, non-ATPase 5
NUP188	ENSG00000095319	0.296533	7.42301	2.95294e-14	4.54508e-13	protein_coding	9	131709978	131769375	+	nucleoporin 188
CRAT	ENSG00000095321	-0.213484	6.68466	2.64183e-08	1.91733e-07	protein_coding	9	131857089	131873468	-	carnitine O-acetyltransferase
NANS	ENSG00000095380	0.386229	5.16319	2.9351e-16	5.58776e-15	protein_coding	9	100819021	100845357	+	N-acetylneuraminate synthase
TBC1D2	ENSG00000095383	0.27549	4.02185	7.06256e-06	3.26364e-05	protein_coding	9	100961311	101017915	-	TBC1 domain family member 2
DFNB31	ENSG00000095397	0.263168	5.56963	6.02324e-08	4.11986e-07	protein_coding	9	117164360	117267730	-	whirlin
CWF19L1	ENSG00000095485	0.292377	4.45367	2.27331e-08	1.66611e-07	protein_coding	10	101992055	102027437	-	CWF19 like cell cycle control factor 1
SEMA4G	ENSG00000095539	-0.456056	2.74939	1.21001e-08	9.26666e-08	protein_coding	10	102729275	102745628	+	semaphorin 4G
TLL2	ENSG00000095587	0.862045	6.4008	2.08797e-95	2.27187e-93	protein_coding	10	98124363	98273675	-	tolloid like 2
BAMBI	ENSG00000095739	-0.181932	4.78158	0.000123157	0.000443722	protein_coding	10	28966271	28971868	+	BMP and activin membrane bound inhibitor
WAC	ENSG00000095787	0.13572	6.68005	0.000306399	0.00101191	protein_coding	10	28821422	28912041	+	WW domain containing adaptor with coiled-coil
FKBP5	ENSG00000096060	0.525918	3.21591	5.05632e-12	6.11296e-11	protein_coding	6	35541362	35696360	-	FKBP prolyl isomerase 5
SRPK1	ENSG00000096063	0.184374	5.89616	1.07563e-05	4.80568e-05	protein_coding	6	35800743	35889119	-	SRSF protein kinase 1
BRPF3	ENSG00000096070	0.266808	5.77863	8.66496e-14	1.26357e-12	protein_coding	6	36164521	36200567	+	bromodomain and PHD finger containing 3
TMEM14A	ENSG00000096092	-0.149782	4.49567	0.0103076	0.0229969	protein_coding	6	52535907	52551386	+	transmembrane protein 14A
EFHC1	ENSG00000096093	-0.210372	5.13955	1.33714e-06	7.22177e-06	protein_coding	6	52285106	52387892	+	EF-hand domain containing 1
HSP90AB1	ENSG00000096384	0.159859	10.4046	3.17072e-05	0.000128694	protein_coding	6	44214824	44221620	+	heat shock protein 90 alpha family class B member 1
CDC5L	ENSG00000096401	0.164695	6.10063	2.23233e-05	9.40332e-05	protein_coding	6	44355262	44418163	+	cell division cycle 5 like
ITPR3	ENSG00000096433	0.217664	7.25271	8.4992e-08	5.63361e-07	protein_coding	6	33588142	33664351	+	inositol 1,4,5-trisphosphate receptor type 3
HNRNPH3	ENSG00000096746	0.150027	6.73369	0.000124603	0.000448589	protein_coding	10	70090931	70102948	+	heterogeneous nuclear ribonucleoprotein H3
IFT74	ENSG00000096872	0.242068	3.37326	0.00107014	0.00312171	protein_coding	9	26947037	27062928	+	intraflagellar transport 74
JAK2	ENSG00000096968	0.185046	5.43301	0.000237918	0.000807039	protein_coding	9	4985033	5128183	+	Janus kinase 2
IL12RB1	ENSG00000096996	2.66787	0.273936	7.48564e-39	4.28682e-37	protein_coding	19	18169805	18209754	-	interleukin 12 receptor subunit beta 1
ABL1	ENSG00000097007	0.192614	7.05742	5.25208e-08	3.6328e-07	protein_coding	9	133589333	133763062	+	ABL proto-oncogene 1, non-receptor tyrosine kinase
CDC7	ENSG00000097046	0.184782	4.22894	0.000326518	0.00107235	protein_coding	1	91966408	91991321	+	cell division cycle 7
SCD	ENSG00000099194	-0.291812	7.03918	4.15142e-15	6.94934e-14	protein_coding	10	102106881	102124591	+	stearoyl-CoA desaturase
TMED1	ENSG00000099203	0.280503	2.77131	0.00068791	0.00209709	protein_coding	19	10943114	10946994	-	transmembrane p24 trafficking protein 1
ABLIM1	ENSG00000099204	-0.545038	6.15713	1.03405e-56	8.21718e-55	protein_coding	10	116190872	116444762	-	actin binding LIM protein 1
ERMP1	ENSG00000099219	-0.127126	5.58263	0.00121665	0.00349005	protein_coding	9	5765076	5833117	-	endoplasmic reticulum metallopeptidase 1
NRP1	ENSG00000099250	0.111939	8.47417	0.0019003	0.00519416	protein_coding	10	33466420	33625190	-	neuropilin 1
PALMD	ENSG00000099260	-0.393418	1.87667	0.0018478	0.00506239	protein_coding	1	100111499	100160097	+	palmdelphin
TSPAN15	ENSG00000099282	0.229582	4.94039	4.27451e-06	2.08565e-05	protein_coding	10	71211229	71267425	+	tetraspanin 15
MAST3	ENSG00000099308	0.258434	3.05133	0.00086179	0.00257011	protein_coding	19	18208603	18262502	+	microtubule associated serine/threonine kinase 3
MZF1	ENSG00000099326	-0.451702	4.56618	7.75222e-16	1.39688e-14	protein_coding	19	59073298	59084942	-	myeloid zinc finger 1
MYO9B	ENSG00000099331	0.126488	7.72016	0.00169957	0.00470273	protein_coding	19	17186591	17325346	+	myosin IXB
KCNK6	ENSG00000099337	0.446411	0.637101	0.00281892	0.00736627	protein_coding	19	38810484	38819660	+	potassium two pore domain channel subfamily K member 6
PSMD8	ENSG00000099341	-0.170366	7.74851	3.48557e-06	1.72691e-05	protein_coding	19	38865176	38874464	+	proteasome 26S subunit, non-ATPase 8
HSD3B7	ENSG00000099377	-0.319518	2.23298	0.00370292	0.00936657	protein_coding	16	30996519	31000473	+	hydroxy-delta-5-steroid dehydrogenase, 3 beta- and steroid delta-isomerase 7
BCL7C	ENSG00000099385	-0.233614	4.27333	9.80393e-06	4.40943e-05	protein_coding	16	30844947	30906281	-	BAF chromatin remodeling complex subunit BCL7C
CIRBP	ENSG00000099622	-0.286605	6.71308	3.04618e-12	3.78964e-11	protein_coding	19	1259384	1274879	+	cold inducible RNA binding protein
ATP5D	ENSG00000099624	-0.135659	6.93092	0.000569874	0.00177123	protein_coding	19	1241749	1244824	+	ATP synthase F1 subunit delta
MARCH2	ENSG00000099785	-0.48541	4.46931	1.51624e-17	3.23001e-16	protein_coding	19	8478154	8503901	+	membrane associated ring-CH-type finger 2
NDUFB7	ENSG00000099795	-0.309427	6.27031	8.37849e-12	9.87946e-11	protein_coding	19	14676890	14682874	-	NADH:ubiquinone oxidoreductase subunit B7
MTAP	ENSG00000099810	0.183775	5.29154	4.04928e-06	1.98741e-05	protein_coding	9	21802542	21931646	+	methylthioadenosine phosphorylase
POLR2E	ENSG00000099817	-0.153027	7.17269	0.00046678	0.0014814	protein_coding	19	1086594	1095598	-	RNA polymerase II subunit E
IZUMO4	ENSG00000099840	-0.597095	1.02217	3.38146e-05	0.000136465	protein_coding	19	2096380	2099592	+	IZUMO family member 4
PALM	ENSG00000099864	-0.347879	1.70035	0.0108907	0.0241266	protein_coding	19	708953	748329	+	paralemmin
MADCAM1	ENSG00000099866	-0.40711	0.257473	0.0171309	0.0356925	protein_coding	19	489176	505347	+	mucosal vascular addressin cell adhesion molecule 1
TRMT2A	ENSG00000099899	-0.114664	5.11688	0.00742805	0.0172812	protein_coding	22	20099389	20104915	-	tRNA methyltransferase 2 homolog A
RANBP1	ENSG00000099901	0.109517	7.73912	0.00369397	0.0093456	protein_coding	22	20103461	20114878	+	RAN binding protein 1
MED15	ENSG00000099917	0.115788	7.42314	0.00365666	0.00926279	protein_coding	22	20850200	20941919	+	mediator complex subunit 15
CRKL	ENSG00000099942	0.375062	6.48163	4.25922e-22	1.29563e-20	protein_coding	22	21271714	21308037	+	CRK like proto-oncogene, adaptor protein
MMP11	ENSG00000099953	-0.424923	1.30862	0.00117664	0.00339383	protein_coding	22	24110413	24126503	+	matrix metallopeptidase 11
CECR2	ENSG00000099954	-0.156593	3.49189	0.0112463	0.0248135	protein_coding	22	17840837	18037850	+	CECR2 histone acetyl-lysine reader
P2RX6	ENSG00000099957	-0.168373	3.76909	0.0194725	0.0398493	protein_coding	22	21364097	21383119	+	purinergic receptor P2X 6
BCL2L13	ENSG00000099968	0.306031	7.1359	5.4113e-15	8.98389e-14	protein_coding	22	18111621	18213388	+	BCL2 like 13
RNF215	ENSG00000099999	-0.145733	4.62689	0.00629847	0.0149208	protein_coding	22	30773835	30817760	-	ring finger protein 215
SEC14L2	ENSG00000100003	-0.213956	5.88648	9.70667e-06	4.36986e-05	protein_coding	22	30792846	30821305	+	SEC14 like lipid binding 2
SPECC1L	ENSG00000100014	0.3275	5.59292	2.28375e-17	4.79283e-16	protein_coding	22	24666786	24813708	+	sperm antigen with calponin homology and coiled-coil domains 1 like
SNRPD3	ENSG00000100028	0.0995879	6.3343	0.0119273	0.0261245	protein_coding	22	24951471	25005947	+	small nuclear ribonucleoprotein D3 polypeptide
DGCR14	ENSG00000100056	0.180695	4.55079	0.000481645	0.0015255	protein_coding	22	19117792	19132197	-	ess-2 splicing factor homolog
CRYBB2P1	ENSG00000100058	-0.117444	4.4549	0.0134559	0.0290276	pseudogene	22	25844072	25916821	+
GGA1	ENSG00000100083	-0.13602	6.05749	0.000362134	0.00117946	protein_coding	22	38004481	38029571	+	golgi associated, gamma adaptin ear containing, ARF binding protein 1
HIRA	ENSG00000100084	0.470668	4.08536	2.95055e-18	6.63521e-17	protein_coding	22	19318221	19435224	-	histone cell cycle regulator
SH3BP1	ENSG00000100092	0.208433	3.48046	0.00384762	0.00969962	protein_coding	22	38030661	38062939	+	SH3 domain binding protein 1
LGALS1	ENSG00000100097	-0.311332	9.04331	9.88695e-14	1.4329e-12	protein_coding	22	38071615	38075813	+	galectin 1
PIK3IP1	ENSG00000100100	-0.800596	2.13319	9.56401e-09	7.44131e-08	protein_coding	22	31677579	31688520	-	phosphoinositide-3-kinase interacting protein 1
NOL12	ENSG00000100101	-0.141562	4.68282	0.0034439	0.00878363	protein_coding	22	38077680	38170137	+
PATZ1	ENSG00000100105	0.137584	4.63439	0.00573367	0.0137556	protein_coding	22	31721790	31742218	-	POZ/BTB and AT hook containing zinc finger 1
TRIOBP	ENSG00000100106	0.0939615	5.1648	0.0231708	0.0464038	protein_coding	22	38093011	38172563	+	TRIO and F-actin binding protein
TFIP11	ENSG00000100109	0.120939	5.04106	0.00920879	0.0208447	protein_coding	22	26887191	26908471	-	tuftelin interacting protein 11
GCAT	ENSG00000100116	-0.435343	3.85668	2.37496e-09	2.00321e-08	protein_coding	22	38203912	38213183	+	glycine C-acetyltransferase
EIF3L	ENSG00000100129	-0.267408	7.66077	1.24175e-14	1.978e-13	protein_coding	22	38244875	38285414	+	eukaryotic translation initiation factor 3 subunit L
MICALL1	ENSG00000100139	0.22664	6.92978	3.10356e-09	2.58094e-08	protein_coding	22	38301664	38338829	+	MICAL like 1
POLR2F	ENSG00000100142	-0.153566	5.67213	0.000364624	0.00118647	protein_coding	22	38348614	38437922	+	RNA polymerase II subunit F
CCDC134	ENSG00000100147	0.457539	3.43785	3.59344e-11	3.90693e-10	protein_coding	22	42196683	42222303	+	coiled-coil domain containing 134
DEPDC5	ENSG00000100150	0.248084	4.39771	6.81661e-07	3.88168e-06	protein_coding	22	32149944	32303012	+	DEP domain containing 5, GATOR1 subcomplex subunit
KDELR3	ENSG00000100196	-0.262906	4.35999	8.66726e-06	3.94461e-05	protein_coding	22	38864067	38879452	+	KDEL endoplasmic reticulum protein retention receptor 3
TCF20	ENSG00000100207	0.269021	5.6957	1.82169e-12	2.31933e-11	protein_coding	22	42556019	42739622	-	transcription factor 20
CBY1	ENSG00000100211	-0.190851	3.33021	0.00926273	0.0209366	protein_coding	22	39052641	39069859	+	chibby family member 1, beta catenin antagonist
TOMM22	ENSG00000100216	-0.108541	6.3269	0.0204139	0.0415594	protein_coding	22	39077953	39080818	+	translocase of outer mitochondrial membrane 22
XBP1	ENSG00000100219	0.221891	6.06908	2.9628e-08	2.13712e-07	protein_coding	22	29190543	29196585	-	X-box binding protein 1
JOSD1	ENSG00000100221	0.135872	6.83623	0.000340264	0.0011131	protein_coding	22	39081548	39097561	-	Josephin domain containing 1
GTPBP1	ENSG00000100226	0.443777	5.83052	1.21582e-28	5.05816e-27	protein_coding	22	39101728	39134304	+	GTP binding protein 1
POLDIP3	ENSG00000100227	0.139662	6.81871	7.32978e-05	0.000276111	protein_coding	22	42979727	43010968	-	DNA polymerase delta interacting protein 3
TIMP3	ENSG00000100234	0.080186	8.28283	0.0207539	0.0421425	protein_coding	22	33197687	33259030	+	TIMP metallopeptidase inhibitor 3
CYB5R3	ENSG00000100243	-0.208972	8.61232	6.44754e-08	4.37832e-07	protein_coding	22	43013846	43045574	-	cytochrome b5 reductase 3
DNAL4	ENSG00000100246	-0.206901	3.54386	0.000762378	0.00230621	protein_coding	22	39174513	39190203	-	dynein axonemal light chain 4
LMF2	ENSG00000100258	0.379102	7.86317	5.2525e-21	1.46831e-19	protein_coding	22	50941376	50946135	-	lipase maturation factor 2
RHBDD3	ENSG00000100263	0.367251	5.48387	9.9188e-16	1.7648e-14	protein_coding	22	29655841	29664198	-	rhomboid domain containing 3
PACSIN2	ENSG00000100266	0.0767718	7.82995	0.016333	0.0342927	protein_coding	22	43231418	43411151	-	protein kinase C and casein kinase substrate in neurons 2
THOC5	ENSG00000100296	-0.152202	5.57793	0.000202938	0.000699794	protein_coding	22	29901868	29951205	-	THO complex 5
MCM5	ENSG00000100297	0.137968	6.92784	0.00302949	0.00785595	protein_coding	22	35796056	35821423	+	minichromosome maintenance complex component 5
TSPO	ENSG00000100300	-0.130529	6.27857	0.0047517	0.0116912	protein_coding	22	43547520	43559248	+	translocator protein
RASD2	ENSG00000100302	0.694456	1.45823	6.30926e-09	5.03637e-08	protein_coding	22	35936915	35950048	+	RASD family member 2
TTLL12	ENSG00000100304	0.140641	6.5094	0.000152441	0.000540286	protein_coding	22	43562628	43583139	-	tubulin tyrosine ligase like 12
RPL3	ENSG00000100316	-0.34695	9.28943	3.56587e-27	1.39721e-25	protein_coding	22	39708887	39716394	-	ribosomal protein L3
ZMAT5	ENSG00000100319	-0.194795	2.89811	0.0162423	0.0341479	protein_coding	22	30126945	30163000	-	zinc finger matrin-type 5
RBFOX2	ENSG00000100320	0.157447	7.76181	1.07579e-06	5.90726e-06	protein_coding	22	36134783	36424473	-	RNA binding fox-1 homolog 2
APOL1	ENSG00000100342	1.86832	6.54169	1.01894e-214	1.87181e-212	protein_coding	22	36649056	36663576	+	apolipoprotein L1
TXN2	ENSG00000100348	-0.203923	6.51115	7.47814e-08	4.99897e-07	protein_coding	22	36863083	36878077	-	thioredoxin 2
FOXRED2	ENSG00000100350	0.126379	5.85786	0.00787368	0.0181769	protein_coding	22	36883237	36903148	-	FAD dependent oxidoreductase domain containing 2
TNRC6B	ENSG00000100354	0.120662	5.97122	0.00277636	0.00727252	protein_coding	22	40440821	40731812	+	trinucleotide repeat containing adaptor 6B
SGSM3	ENSG00000100359	-0.187643	5.93934	3.9262e-06	1.93236e-05	protein_coding	22	40766595	40806293	+	small G protein signaling modulator 3
IFT27	ENSG00000100360	-0.415702	5.20504	1.07658e-24	3.78811e-23	protein_coding	22	37154246	37172300	-	intraflagellar transport 27
FAM118A	ENSG00000100376	0.168687	3.55373	0.0111959	0.0247138	protein_coding	22	45704849	45737836	+	family with sequence similarity 118 member A
EP300	ENSG00000100393	0.0902114	7.37534	0.00520227	0.012648	protein_coding	22	41487790	41576081	+	E1A binding protein p300
L3MBTL2	ENSG00000100395	0.231374	5.19418	6.48703e-08	4.40091e-07	protein_coding	22	41601209	41627275	+	L3MBTL histone methyl-lysine binding protein 2
RANGAP1	ENSG00000100401	0.156451	8.09035	3.56619e-05	0.000143265	protein_coding	22	41641615	41682255	-	Ran GTPase activating protein 1
ZC3H7B	ENSG00000100403	0.0748847	7.71671	0.0208613	0.0423525	protein_coding	22	41697526	41756151	+	zinc finger CCCH-type containing 7B
PHF5A	ENSG00000100410	0.104932	5.11736	0.0114579	0.0252096	protein_coding	22	41855721	41864729	-	PHD finger protein 5A
ACO2	ENSG00000100412	-0.116091	7.24966	0.00133796	0.0038018	protein_coding	22	41865129	41924993	+	aconitase 2
PMM1	ENSG00000100417	-0.210576	4.35003	1.71548e-05	7.38452e-05	protein_coding	22	41972898	41985894	-	phosphomannomutase 1
DESI1	ENSG00000100418	0.0949485	6.22658	0.0105103	0.0234087	protein_coding	22	41994032	42017100	-	desumoylating isopeptidase 1
CERK	ENSG00000100422	-1.19652	7.0372	6.922e-253	1.41901e-250	protein_coding	22	47080308	47134158	-	ceramide kinase
BRD1	ENSG00000100425	0.0885396	5.76553	0.0193938	0.0397113	protein_coding	22	50166931	50221160	-	bromodomain containing 1
ZBED4	ENSG00000100426	0.0912236	5.39705	0.0239002	0.0477497	protein_coding	22	50247490	50283726	+	zinc finger BED-type containing 4
MLC1	ENSG00000100427	-1.88955	-0.287982	2.28114e-16	4.39003e-15	protein_coding	22	50497820	50524331	-	modulator of VRAC current 1
ABHD4	ENSG00000100439	0.174989	5.51197	8.00018e-05	0.000299134	protein_coding	14	23067146	23081265	+	abhydrolase domain containing 4
SDR39U1	ENSG00000100445	-0.336188	2.43032	0.000201914	0.000696774	protein_coding	14	24908972	24912111	-	short chain dehydrogenase/reductase family 39U member 1
PRMT5	ENSG00000100462	0.142146	4.36943	0.00357993	0.00908795	protein_coding	14	23389720	23398794	-	protein arginine methyltransferase 5
POLE2	ENSG00000100479	0.535104	2.47754	1.21835e-08	9.31544e-08	protein_coding	14	50110273	50155140	-	DNA polymerase epsilon 2, accessory subunit
NIN	ENSG00000100503	-0.127099	5.79686	0.000590591	0.00182999	protein_coding	14	51186481	51297839	-	ninein
TRIM9	ENSG00000100505	-0.261493	4.79078	4.97911e-05	0.00019408	protein_coding	14	51441980	51562779	-	tripartite motif containing 9
PSMC6	ENSG00000100519	0.144767	5.74446	7.60434e-05	0.00028539	protein_coding	14	53173890	53195305	+	proteasome 26S subunit, ATPase 6
CDKN3	ENSG00000100526	-0.240837	4.98733	0.000184406	0.000641838	protein_coding	14	54863567	54886936	+	cyclin dependent kinase inhibitor 3
ATP6V1D	ENSG00000100554	-0.149581	5.4495	0.000332198	0.00108847	protein_coding	14	67761088	67826982	-	ATPase H+ transporting V1 subunit D
PIGH	ENSG00000100564	0.203279	2.87115	0.0141051	0.030175	protein_coding	14	68048672	68067004	-	phosphatidylinositol glycan anchor biosynthesis class H
PSMA3	ENSG00000100567	0.162743	5.79042	5.1925e-06	2.48892e-05	protein_coding	14	58711549	58738730	+	proteasome 20S subunit alpha 3
VTI1B	ENSG00000100568	-0.174182	4.54637	0.000229831	0.000781856	protein_coding	14	68113792	68141548	-	vesicle transport through interaction with t-SNAREs 1B
GSTZ1	ENSG00000100577	-0.581536	3.26638	3.17835e-17	6.61143e-16	protein_coding	14	77787227	77797940	+	glutathione S-transferase zeta 1
AHSA1	ENSG00000100591	0.126929	6.22828	0.000429739	0.00137247	protein_coding	14	77924213	77935817	+	activator of HSP90 ATPase activity 1
DAAM1	ENSG00000100592	-0.267658	4.85539	2.02358e-08	1.49548e-07	protein_coding	14	59655364	59838123	+	dishevelled associated activator of morphogenesis 1
SPTLC2	ENSG00000100596	0.117878	5.70388	0.0029469	0.0076653	protein_coding	14	77972340	78083116	-	serine palmitoyltransferase long chain base subunit 2
RIN3	ENSG00000100599	0.160143	3.82482	0.00513761	0.0125123	protein_coding	14	92980118	93155339	+	Ras and Rab interactor 3
LGMN	ENSG00000100600	1.1898	5.31875	1.05804e-169	1.72023e-167	protein_coding	14	93170152	93215047	-	legumain
ALKBH1	ENSG00000100601	0.252827	3.11258	0.000345523	0.00112873	protein_coding	14	78138747	78174363	-	alkB homolog 1, histone H2A dioxygenase
SNW1	ENSG00000100603	0.142162	5.34587	0.00232249	0.00621602	protein_coding	14	78183942	78227550	-	SNW domain containing 1
DHRS7	ENSG00000100612	-0.15031	5.1086	0.000593202	0.00183687	protein_coding	14	60610838	60636574	-	dehydrogenase/reductase 7
CEP128	ENSG00000100629	0.36927	3.08409	8.38009e-08	5.56509e-07	protein_coding	14	80943330	81425861	-	centrosomal protein 128
KIAA0247	ENSG00000100647	0.227428	4.11858	4.14777e-05	0.000164665	protein_coding	14	70078313	70181859	+	sushi domain containing 6
SRSF5	ENSG00000100650	-0.185073	6.59946	5.97402e-06	2.81803e-05	protein_coding	14	70193617	70238722	+	serine and arginine rich splicing factor 5
EIF5	ENSG00000100664	0.0865323	7.51242	0.0136632	0.029403	protein_coding	14	103799881	103811362	+	eukaryotic translation initiation factor 5
MTHFD1	ENSG00000100714	0.199543	6.45602	3.30515e-08	2.36357e-07	protein_coding	14	64854749	64926722	+	methylenetetrahydrofolate dehydrogenase, cyclohydrolase and formyltetrahydrofolate synthetase 1
PCNX	ENSG00000100731	0.1017	6.15796	0.00470902	0.0116024	protein_coding	14	71374122	71582099	+	pecanex 1
VRK1	ENSG00000100749	0.291427	4.0064	4.11321e-06	2.01529e-05	protein_coding	14	97263641	97398059	+	VRK serine/threonine kinase 1
PAPLN	ENSG00000100767	-0.396878	0.395279	0.0227506	0.0456724	protein_coding	14	73704205	73741348	+	papilin, proteoglycan like sulfated glycoprotein
RPS6KA5	ENSG00000100784	0.392102	3.64062	4.04661e-09	3.31054e-08	protein_coding	14	91336799	91526980	-	ribosomal protein S6 kinase A5
SMEK1	ENSG00000100796	0.19445	5.85835	7.66947e-07	4.32038e-06	protein_coding	14	91923955	91976898	-	protein phosphatase 4 regulatory subunit 3A
ACIN1	ENSG00000100813	0.151303	7.23912	4.62655e-06	2.23965e-05	protein_coding	14	23527773	23564823	-	apoptotic chromatin condensation inducer 1
APEX1	ENSG00000100823	-0.176729	6.26191	4.20377e-06	2.05539e-05	protein_coding	14	20923350	20925927	+	apurinic/apyrimidinic endodeoxyribonuclease 1
PABPN1	ENSG00000100836	-0.166416	5.36562	9.25736e-05	0.000341448	protein_coding	14	23790498	23795394	+	poly(A) binding protein nuclear 1
ARHGAP5	ENSG00000100852	0.0973692	6.66854	0.00950755	0.0214113	protein_coding	14	32545320	32628934	+	Rho GTPase activating protein 5
CINP	ENSG00000100865	-0.17407	3.94727	0.0131636	0.0284448	protein_coding	14	102808956	102829253	-	cyclin dependent kinase 2 interacting protein
DHRS2	ENSG00000100867	0.867647	1.22942	3.77471e-11	4.09458e-10	protein_coding	14	24099324	24114848	+	dehydrogenase/reductase 2
CHD8	ENSG00000100888	0.238446	6.28174	1.00673e-11	1.17883e-10	protein_coding	14	21853353	21924285	-	chromodomain helicase DNA binding protein 8
PCK2	ENSG00000100889	0.293154	3.48865	2.14831e-06	1.11311e-05	protein_coding	14	24563262	24579807	+	phosphoenolpyruvate carboxykinase 2, mitochondrial
DCAF11	ENSG00000100897	-0.215149	4.77404	4.43461e-06	2.15707e-05	protein_coding	14	24583404	24594451	+	DDB1 and CUL4 associated factor 11
PSMA6	ENSG00000100902	0.298947	2.27271	0.00789925	0.0182216	protein_coding	14	35747839	35786699	+	proteasome 20S subunit alpha 6
NFKBIA	ENSG00000100906	-0.165177	4.21915	0.00296196	0.00770307	protein_coding	14	35870717	35873955	-	NFKB inhibitor alpha
PSME2	ENSG00000100911	1.07434	6.71312	4.81273e-219	8.95737e-217	protein_coding	14	24612574	24616779	-	proteasome activator subunit 2
REC8	ENSG00000100918	1.10934	3.11908	1.36024e-32	6.61188e-31	protein_coding	14	24641062	24649463	+	REC8 meiotic recombination protein
TM9SF1	ENSG00000100926	0.345836	2.47037	0.00136106	0.0038597	protein_coding	14	24658349	24682679	-	transmembrane 9 superfamily member 1
PNN	ENSG00000100941	0.145338	6.73695	0.000208646	0.000718344	protein_coding	14	39644387	39652422	+	pinin, desmosome associated protein
PCIF1	ENSG00000100982	-0.137149	5.07239	0.00156789	0.0043821	protein_coding	20	44563267	44576662	+	PDX1 C-terminal inhibiting factor 1
GSS	ENSG00000100983	-0.100489	6.18034	0.00462458	0.0114162	protein_coding	20	33516236	33543620	-	glutathione synthetase
PYGB	ENSG00000100994	0.109375	10.5594	0.000721839	0.00219155	protein_coding	20	25228705	25278650	+	glycogen phosphorylase B
PROCR	ENSG00000101000	0.683961	5.35877	5.40465e-59	4.41901e-57	protein_coding	20	33759876	33765165	+	protein C receptor
GINS1	ENSG00000101003	0.551846	4.71932	2.19815e-34	1.13893e-32	protein_coding	20	25388363	25433264	+	GINS complex subunit 1
IFT52	ENSG00000101052	-0.164245	4.44728	0.00483905	0.0118751	protein_coding	20	42219571	42275936	+	intraflagellar transport 52
NFATC2	ENSG00000101096	-0.514652	1.96173	8.42605e-06	3.84472e-05	protein_coding	20	50003494	50179370	-	nuclear factor of activated T cells 2
STK4	ENSG00000101109	0.365491	5.65171	6.48555e-19	1.54441e-17	protein_coding	20	43595115	43708600	+	serine/threonine kinase 4
ADNP	ENSG00000101126	0.133957	7.14957	0.000176617	0.000616455	protein_coding	20	49505585	49547958	-	activity dependent neuroprotector homeobox
CSTF1	ENSG00000101138	0.2222	5.25518	2.42551e-08	1.76941e-07	protein_coding	20	54967427	54979518	+	cleavage stimulation factor subunit 1
DNAJC5	ENSG00000101152	0.17434	7.20431	9.34155e-08	6.14942e-07	protein_coding	20	62526518	62567384	+	DnaJ heat shock protein family (Hsp40) member C5
NELFCD	ENSG00000101158	-0.0746146	7.09762	0.024736	0.0492249	protein_coding	20	57556263	57570188	+	negative elongation factor complex member C/D
TUBB1	ENSG00000101162	-0.611993	0.384264	0.000282549	0.000939727	protein_coding	20	57594309	57601709	+	tubulin beta 1 class VI
SLMO2	ENSG00000101166	0.102697	6.24811	0.00923487	0.0208903	protein_coding	20	57608200	57617964	-	PRELI domain containing 3B
MTG2	ENSG00000101181	0.225061	5.68063	3.97766e-09	3.25979e-08	protein_coding	20	60758085	60778624	+	mitochondrial ribosome associated GTPase 2
SLCO4A1	ENSG00000101187	0.454284	5.39433	5.55879e-17	1.12973e-15	protein_coding	20	61273797	61317137	+	solute carrier organic anion transporter family member 4A1
NTSR1	ENSG00000101188	0.617724	3.5823	1.07824e-23	3.59709e-22	protein_coding	20	61340189	61394123	+	neurotensin receptor 1
ARFGAP1	ENSG00000101199	-0.231226	6.80476	8.48397e-11	8.79164e-10	protein_coding	20	61904137	61921142	+	ADP ribosylation factor GTPase activating protein 1
C20orf27	ENSG00000101220	-0.103246	5.91183	0.0199717	0.0407825	protein_coding	20	3734155	3749034	-	chromosome 20 open reading frame 27
RNF24	ENSG00000101236	0.206732	6.04676	5.5404e-09	4.45025e-08	protein_coding	20	3907956	3996229	-	ring finger protein 24
TRIB3	ENSG00000101255	0.426822	4.88391	1.56195e-22	4.89885e-21	protein_coding	20	361261	378203	+	tribbles pseudokinase 3
RASSF2	ENSG00000101265	-0.137791	3.93345	0.0179307	0.0371238	protein_coding	20	4760669	4804291	-	Ras association domain family member 2
HM13	ENSG00000101294	0.139374	7.79127	7.18211e-05	0.000270909	protein_coding	20	30102231	30157370	+	histocompatibility minor 13
SNPH	ENSG00000101298	0.142059	4.75641	0.00212452	0.00574157	protein_coding	20	1246960	1289972	+	syntaphilin
SEC23B	ENSG00000101310	0.112585	6.74998	0.000733297	0.00222299	protein_coding	20	18488137	18542059	+	SEC23 homolog B, coat complex II component
FERMT1	ENSG00000101311	0.153699	5.47761	0.00011143	0.000404458	protein_coding	20	6055492	6104191	-	fermitin family member 1
PLCB4	ENSG00000101333	-0.282394	3.01084	0.00125788	0.00359666	protein_coding	20	9049410	9461889	+	phospholipase C beta 4
MYL9	ENSG00000101335	-0.408891	5.42481	6.78623e-16	1.2386e-14	protein_coding	20	35169887	35178228	+	myosin light chain 9
TM9SF4	ENSG00000101337	0.268425	6.94354	1.47317e-15	2.57577e-14	protein_coding	20	30697309	30755061	+	transmembrane 9 superfamily member 4
TLDC2	ENSG00000101342	2.5561	0.979798	6.08393e-53	4.55329e-51	protein_coding	20	35504524	35522638	+	TBC/LysM-associated domain containing 2
POFUT1	ENSG00000101346	0.149373	7.21298	3.31e-05	0.000133963	protein_coding	20	30795683	30826470	+	protein O-fucosyltransferase 1
SAMHD1	ENSG00000101347	2.62249	7.53605	0	0	protein_coding	20	35518632	35580246	-	SAM and HD domain containing deoxynucleoside triphosphate triphosphohydrolase 1
KIF3B	ENSG00000101350	-0.242057	7.19522	8.12495e-14	1.19219e-12	protein_coding	20	30865467	30922814	+	kinesin family member 3B
IDH3B	ENSG00000101365	-0.148433	6.65908	0.000186758	0.000648747	protein_coding	20	2639041	2644865	-	isocitrate dehydrogenase (NAD(+)) 3 non-catalytic subunit beta
JAG1	ENSG00000101384	-0.104277	8.2856	0.00311601	0.00805182	protein_coding	20	10618332	10654694	-	jagged canonical Notch ligand 1
CDK5RAP1	ENSG00000101391	0.291897	4.69779	1.4757e-10	1.47726e-09	protein_coding	20	31946645	31989367	-	CDK5 regulatory subunit associated protein 1
SNTA1	ENSG00000101400	-0.538737	4.19347	6.96789e-24	2.36357e-22	protein_coding	20	31995761	32031698	-	syntrophin alpha 1
TTI1	ENSG00000101407	0.380799	5.6039	3.87992e-20	1.02682e-18	protein_coding	20	36611409	36661870	-	TELO2 interacting protein 1
E2F1	ENSG00000101412	0.107777	6.0783	0.012326	0.0268797	protein_coding	20	32263489	32274210	-	E2F transcription factor 1
RPRD1B	ENSG00000101413	0.242061	5.38048	1.3655e-10	1.37181e-09	protein_coding	20	36661948	36720768	+	regulation of nuclear pre-mRNA domain containing 1B
CST3	ENSG00000101439	0.0926685	7.82121	0.0116599	0.0256221	protein_coding	20	23608534	23619110	-	cystatin C
AHCY	ENSG00000101444	-0.23339	6.7441	9.19969e-11	9.45709e-10	protein_coding	20	32868074	32899608	-	adenosylhomocysteinase
MAP1LC3A	ENSG00000101460	-0.64215	4.28518	2.97702e-15	5.05521e-14	protein_coding	20	33134658	33148149	+	microtubule associated protein 1 light chain 3 alpha
ACOT8	ENSG00000101473	-0.114115	4.4578	0.0156304	0.0330283	protein_coding	20	44470360	44486045	-	acyl-CoA thioesterase 8
ADNP2	ENSG00000101544	0.157862	5.42358	2.60277e-05	0.000107776	protein_coding	18	77866915	77905406	+	ADNP homeobox 2
USP14	ENSG00000101557	0.164413	7.44036	6.62235e-07	3.77656e-06	protein_coding	18	158383	214629	+	ubiquitin specific peptidase 14
METTL4	ENSG00000101574	0.161202	4.03731	0.00284078	0.00741381	protein_coding	18	2537524	2571508	-	methyltransferase like 4
LPIN2	ENSG00000101577	0.136299	5.41526	0.00399885	0.0100261	protein_coding	18	2916992	3013313	-	lipin 2
SMCHD1	ENSG00000101596	0.444469	7.22912	1.05649e-30	4.78977e-29	protein_coding	18	2655737	2805015	+	structural maintenance of chromosomes flexible hinge domain containing 1
CEP76	ENSG00000101624	0.149301	3.35397	0.0230659	0.0462381	protein_coding	18	12661832	12702776	-	centrosomal protein 76
ST8SIA5	ENSG00000101638	-0.303022	3.55076	7.67476e-06	3.52476e-05	protein_coding	18	44259081	44339220	-	ST8 alpha-N-acetyl-neuraminide alpha-2,8-sialyltransferase 5
RNMT	ENSG00000101654	-0.0978158	5.67049	0.00846934	0.0193473	protein_coding	18	13726659	13764557	+	RNA guanine-7 methyltransferase
SMAD7	ENSG00000101665	-0.396658	3.82033	3.21037e-10	3.06621e-09	protein_coding	18	46446223	46477081	-	SMAD family member 7
LIPG	ENSG00000101670	-0.716435	3.07606	1.74097e-16	3.392e-15	protein_coding	18	47087069	47119272	+	lipase G, endothelial type
MIB1	ENSG00000101752	-0.203062	6.46004	1.61365e-06	8.56154e-06	protein_coding	18	19284918	19450918	+	mindbomb E3 ubiquitin protein ligase 1
RBBP8	ENSG00000101773	0.112287	6.34961	0.00543433	0.0131332	protein_coding	18	20378224	20606451	+	RB binding protein 8, endonuclease
CSTF2	ENSG00000101811	0.127684	4.75054	0.0209395	0.0424949	protein_coding	X	100075384	100095921	+	cleavage stimulation factor subunit 2
MXRA5	ENSG00000101825	-0.292853	6.68411	1.56714e-09	1.36162e-08	protein_coding	X	3226606	3264682	-	matrix remodeling associated 5
PSMD10	ENSG00000101843	-0.230739	6.03948	1.10489e-08	8.52631e-08	protein_coding	X	107327437	107334848	-	proteasome 26S subunit, non-ATPase 10
ATG4A	ENSG00000101844	-0.306933	5.03089	5.57352e-13	7.50833e-12	protein_coding	X	107334898	107397901	+	autophagy related 4A cysteine peptidase
PGRMC1	ENSG00000101856	0.129489	6.82069	0.000404077	0.00129725	protein_coding	X	118370216	118378429	+	progesterone receptor membrane component 1
POLA1	ENSG00000101868	0.160127	5.55352	0.000106074	0.000386308	protein_coding	X	24712036	25015103	+	DNA polymerase alpha 1, catalytic subunit
ALG13	ENSG00000101901	-0.137951	5.0824	0.00114499	0.00331407	protein_coding	X	110909043	111003877	+	ALG13 UDP-N-acetylglucosaminyltransferase subunit
PRPS2	ENSG00000101911	0.225667	5.73973	4.07258e-10	3.84045e-09	protein_coding	X	12809474	12842341	+	phosphoribosyl pyrophosphate synthetase 2
AMMECR1	ENSG00000101935	0.157544	5.09547	0.00026343	0.00088341	protein_coding	X	109437414	109683461	-	AMMECR nuclear protein 1
CHRDL1	ENSG00000101938	-0.170978	6.26136	4.26615e-05	0.000168938	protein_coding	X	109917084	110039286	-	chordin like 1
WDR13	ENSG00000101940	-0.308594	5.80637	8.40047e-11	8.71788e-10	protein_coding	X	48448430	48463581	+	WD repeat domain 13
SUV39H1	ENSG00000101945	0.261085	4.71781	2.89346e-06	1.46171e-05	protein_coding	X	48553945	48567403	+	suppressor of variegation 3-9 homolog 1
SRPX	ENSG00000101955	0.113902	8.09426	0.00472613	0.0116344	protein_coding	X	38008589	38080696	-	sushi repeat containing protein X-linked
XIAP	ENSG00000101966	0.147224	6.35269	0.000100161	0.000366568	protein_coding	X	122993574	123047829	+	X-linked inhibitor of apoptosis
ABCD1	ENSG00000101986	0.329396	6.22355	1.093e-15	1.93741e-14	protein_coding	X	152990323	153010216	+	ATP binding cassette subfamily D member 1
NAA10	ENSG00000102030	-0.168817	4.22564	0.0108082	0.0239627	protein_coding	X	153194695	153200676	-	N(alpha)-acetyltransferase 10, NatA catalytic subunit
ELF4	ENSG00000102034	0.190294	6.47236	3.92825e-06	1.9327e-05	protein_coding	X	129198849	129244691	-	E74 like ETS transcription factor 4
ASB9	ENSG00000102048	-0.316448	3.50281	1.55033e-06	8.25966e-06	protein_coding	X	15253410	15288589	-	ankyrin repeat and SOCS box containing 9
RBBP7	ENSG00000102054	0.0977836	7.80027	0.00280391	0.00733652	protein_coding	X	16857406	16888537	-	RB binding protein 7, chromatin remodeling factor
KCND1	ENSG00000102057	-0.378264	1.84364	0.000946363	0.00279522	protein_coding	X	48818639	48827976	-	potassium voltage-gated channel subfamily D member 1
SLC25A14	ENSG00000102078	-0.155152	3.83642	0.0250766	0.0498257	protein_coding	X	129473874	129507335	+	solute carrier family 25 member 14
FMR1	ENSG00000102081	0.571044	5.94826	1.91429e-40	1.15224e-38	protein_coding	X	146993469	147032645	+	FMRP translational regulator 1
SCML2	ENSG00000102098	0.335001	2.13743	0.0041979	0.0104615	protein_coding	X	18257434	18372847	-	Scm polycomb group protein like 2
SLC35A2	ENSG00000102100	0.132182	5.31927	0.000896531	0.00266137	protein_coding	X	48760459	48769235	-	solute carrier family 35 member A2
PCSK1N	ENSG00000102109	-0.272271	1.87809	0.0057389	0.0137658	protein_coding	X	48689504	48694035	-	proprotein convertase subtilisin/kexin type 1 inhibitor
EMD	ENSG00000102119	-0.156507	6.42079	1.72449e-05	7.4165e-05	protein_coding	X	153607557	153609883	+	emerin
MAGT1	ENSG00000102158	0.115076	6.79619	0.00272286	0.00715756	protein_coding	X	77081861	77151090	-	magnesium transporter 1
SMS	ENSG00000102172	-0.117208	8.12941	0.000476502	0.00151056	protein_coding	X	21958691	22025798	+	spermine synthase
UBL4A	ENSG00000102178	0.107565	6.0274	0.00458184	0.0113206	protein_coding	X	153712056	153715009	-	ubiquitin like 4A
CD99L2	ENSG00000102181	-0.24809	6.80828	7.61102e-13	1.01087e-11	protein_coding	X	149934810	150067289	-	CD99 molecule like 2
EEA1	ENSG00000102189	-0.098027	5.99834	0.0153433	0.0325044	protein_coding	12	93164413	93323107	-	early endosome antigen 1
RP2	ENSG00000102218	0.124232	4.94917	0.00777151	0.0179797	protein_coding	X	46696375	46741793	+	RP2 activator of ARL3 GTPase
JADE3	ENSG00000102221	0.375555	3.95326	2.50122e-10	2.42992e-09	protein_coding	X	46771711	46920641	+	jade family PHD finger 3
CDK16	ENSG00000102225	-0.110913	7.71912	0.0027442	0.00720562	protein_coding	X	47077259	47089396	+	cyclin dependent kinase 16
KLHL4	ENSG00000102271	-0.568875	3.27772	4.92328e-11	5.25187e-10	protein_coding	X	86772752	86925050	+	kelch like family member 4
FGD1	ENSG00000102302	0.118297	5.55599	0.0090127	0.0204564	protein_coding	X	54471887	54522599	-	FYVE, RhoGEF and PH domain containing 1
PIN4	ENSG00000102309	-0.254917	3.61205	2.92468e-05	0.0001196	protein_coding	X	71401203	71522776	+	peptidylprolyl cis/trans isomerase, NIMA-interacting 4
MAGED2	ENSG00000102316	-0.245281	7.23399	2.33381e-09	1.97085e-08	protein_coding	X	54834032	54842445	+	MAGE family member D2
RBM3	ENSG00000102317	-0.525969	6.86172	1.52119e-49	1.08673e-47	protein_coding	X	48432837	48437454	+	RNA binding motif protein 3
SRPX2	ENSG00000102359	0.273984	4.85413	1.0104e-07	6.63207e-07	protein_coding	X	99899215	99926296	+	sushi repeat containing protein X-linked 2
SYTL4	ENSG00000102362	0.278948	4.03335	6.29519e-07	3.60654e-06	protein_coding	X	99929488	99987110	-	synaptotagmin like 4
GLA	ENSG00000102393	0.239293	5.81494	1.01546e-10	1.03709e-09	protein_coding	X	100652791	100662913	-	galactosidase alpha
ARMCX3	ENSG00000102401	-0.149508	5.86542	0.000934515	0.00276427	protein_coding	X	100877787	100882833	+	armadillo repeat containing X-linked 3
BEX4	ENSG00000102409	-0.223627	4.69205	0.00163101	0.0045352	protein_coding	X	102470020	102472174	+	brain expressed X-linked 4
KIAA0226L	ENSG00000102445	-0.635831	1.26728	8.5653e-06	3.90322e-05	protein_coding	13	46916139	47012325	-	rubicon like autophagy enhancer
NALCN	ENSG00000102452	-0.531113	2.95908	1.17226e-11	1.36138e-10	protein_coding	13	101706130	102068843	-	sodium leak channel, non-selective
FGF14	ENSG00000102466	-0.437152	3.57371	1.68992e-09	1.4638e-08	protein_coding	13	102372134	103054124	-	fibroblast growth factor 14
TNFSF13B	ENSG00000102524	3.18149	1.07424	6.14899e-82	6.12517e-80	protein_coding	13	108903588	108960832	+	TNF superfamily member 13b
FNDC3A	ENSG00000102531	0.229642	7.42099	5.33639e-12	6.42958e-11	protein_coding	13	49550048	49783915	+	fibronectin type III domain containing 3A
CAB39L	ENSG00000102547	-0.538126	3.73431	5.5629e-16	1.02859e-14	protein_coding	13	49882786	50018262	-	calcium binding protein 39 like
KLF5	ENSG00000102554	0.232575	6.23456	4.58089e-10	4.29686e-09	protein_coding	13	73629114	73651676	+	Kruppel like factor 5
STK24	ENSG00000102572	0.17993	6.75086	2.67958e-07	1.62882e-06	protein_coding	13	99102455	99230194	-	serine/threonine kinase 24
UGGT2	ENSG00000102595	-0.10385	5.30138	0.0137999	0.0296476	protein_coding	13	96453834	96705736	-	UDP-glucose glycoprotein glucosyltransferase 2
FGF9	ENSG00000102678	-0.218682	3.14556	0.00471993	0.0116217	protein_coding	13	22245522	22278637	+	fibroblast growth factor 9
PARP4	ENSG00000102699	0.138674	6.95246	2.53213e-05	0.000105282	protein_coding	13	24995064	25086948	-	poly(ADP-ribose) polymerase family member 4
SUPT20H	ENSG00000102710	0.304103	5.66868	4.17631e-17	8.56144e-16	protein_coding	13	37583449	37633850	-	SPT20 homolog, SAGA complex component
MRPS31	ENSG00000102738	0.147126	3.73828	0.0163602	0.0343346	protein_coding	13	41303432	41345309	-	mitochondrial ribosomal protein S31
SLC25A15	ENSG00000102743	-0.289557	2.60863	0.000813486	0.00244201	protein_coding	13	41363548	41384247	+	solute carrier family 25 member 15
VWA8	ENSG00000102763	-0.15415	5.10913	0.000794183	0.00238964	protein_coding	13	42140973	42535256	-	von Willebrand factor A domain containing 8
INTS6	ENSG00000102786	0.41414	4.99586	5.2095e-21	1.45918e-19	protein_coding	13	51928213	52028400	-	integrator complex subunit 6
DHRS12	ENSG00000102796	-0.581645	1.28526	6.60688e-05	0.000251627	protein_coding	13	52342129	52378293	-	dehydrogenase/reductase 12
MGRN1	ENSG00000102858	0.106647	6.43398	0.00722265	0.0168922	protein_coding	16	4666494	4740975	+	mahogunin ring finger 1
ZNF629	ENSG00000102870	0.181049	4.79047	5.40059e-05	0.000209234	protein_coding	16	30789778	30798523	-	zinc finger protein 629
TRADD	ENSG00000102871	0.157533	3.98272	0.0127432	0.0276631	protein_coding	16	67188083	67194201	-	TNFRSF1A associated via death domain
HSF4	ENSG00000102878	-0.339262	2.3805	0.00476055	0.0117057	protein_coding	16	67197288	67203848	+	heat shock transcription factor 4
CORO1A	ENSG00000102879	0.377798	0.577128	0.0142272	0.0303993	protein_coding	16	30194148	30200397	+	coronin 1A
MAPK3	ENSG00000102882	-0.43342	5.10524	3.99074e-25	1.43636e-23	protein_coding	16	30125426	30134827	-	mitogen-activated protein kinase 3
ELMO3	ENSG00000102890	-0.321304	2.48553	0.00341291	0.00871716	protein_coding	16	67233014	67237932	+	engulfment and cell motility 3
PHKB	ENSG00000102893	-0.388362	6.82745	1.84093e-29	7.86704e-28	protein_coding	16	47495034	47735434	+	phosphorylase kinase regulatory subunit beta
LYRM1	ENSG00000102897	-0.207055	3.53135	0.00160204	0.00446432	protein_coding	16	20911190	20936328	+	LYR motif containing 1
NUTF2	ENSG00000102898	-0.114951	7.11963	0.00231332	0.00619381	protein_coding	16	67880635	67906470	+	nuclear transport factor 2
TSNAXIP1	ENSG00000102904	-0.357218	1.73241	0.00113671	0.00329355	protein_coding	16	67840668	67866051	+	translin associated factor X interacting protein 1
N4BP1	ENSG00000102921	0.805968	5.97012	1.76853e-97	2.00127e-95	protein_coding	16	48572637	48654059	-	NEDD4 binding protein 1
ARL2BP	ENSG00000102931	-0.128104	5.7741	0.00493387	0.0120681	protein_coding	16	57279010	57287516	+	ADP ribosylation factor like GTPase 2 binding protein
ZNF423	ENSG00000102935	-1.05481	0.642862	8.59749e-10	7.77567e-09	protein_coding	16	49521435	49891830	-	zinc finger protein 423
CTCF	ENSG00000102974	0.106026	6.50998	0.00429463	0.01068	protein_coding	16	67596310	67673086	+	CCCTC-binding factor
MMP15	ENSG00000102996	-0.47239	2.76227	2.11496e-07	1.31408e-06	protein_coding	16	58059470	58080805	+	matrix metallopeptidase 15
CCDC113	ENSG00000103021	-0.196634	2.60873	0.0213207	0.0431777	protein_coding	16	58265061	58317740	+	coiled-coil domain containing 113
NME3	ENSG00000103024	-0.160657	3.74313	0.0145664	0.0310257	protein_coding	16	1820287	1821731	-	NME/NM23 nucleoside diphosphate kinase 3
NDRG4	ENSG00000103034	-0.286712	5.56911	3.39161e-08	2.4205e-07	protein_coding	16	58496750	58547532	+	NDRG family member 4
VAC14	ENSG00000103043	0.188963	5.85633	1.45861e-07	9.30632e-07	protein_coding	16	70721342	70835064	-	VAC14 component of PIKFYVE complex
HAS3	ENSG00000103044	-0.366217	3.11086	2.02281e-07	1.25991e-06	protein_coding	16	69139467	69152622	+	hyaluronan synthase 3
PLA2G15	ENSG00000103066	0.197566	4.54177	1.29765e-05	5.70218e-05	protein_coding	16	68279207	68294961	+	phospholipase A2 group XV
FA2H	ENSG00000103089	0.44882	4.9367	8.83723e-15	1.43681e-13	protein_coding	16	74746853	74808729	-	fatty acid 2-hydroxylase
HCFC1R1	ENSG00000103145	-0.17308	4.90025	0.000767834	0.00231924	protein_coding	16	3072621	3074287	-	host cell factor C1 regulator 1
NPRL3	ENSG00000103148	-0.112666	6.20307	0.00567723	0.0136282	protein_coding	16	134273	188859	-	NPR3 like, GATOR1 complex subunit
MPG	ENSG00000103152	-0.190613	4.61807	0.000485027	0.00153552	protein_coding	16	127006	135852	+	N-methylpurine DNA glycosylase
TAF1C	ENSG00000103168	-0.142908	5.90035	0.000955919	0.00281932	protein_coding	16	84211458	84220669	-	TATA-box binding protein associated factor, RNA polymerase I subunit C
COTL1	ENSG00000103187	-0.327223	7.1611	1.93583e-18	4.42363e-17	protein_coding	16	84599200	84651683	-	coactosin like F-actin binding protein 1
USP10	ENSG00000103194	0.223685	5.92155	5.56812e-08	3.84388e-07	protein_coding	16	84733584	84813528	+	ubiquitin specific peptidase 10
TSC2	ENSG00000103197	-0.173216	6.61507	9.68229e-06	4.36027e-05	protein_coding	16	2097466	2138716	+	TSC complex subunit 2
NME4	ENSG00000103202	-0.184599	6.16059	3.70751e-07	2.20719e-06	protein_coding	16	446725	460367	+	NME/NM23 nucleoside diphosphate kinase 4
LMF1	ENSG00000103227	-0.206447	3.35809	0.0125631	0.0273266	protein_coding	16	903634	1031318	-	lipase maturation factor 1
FOXF1	ENSG00000103241	0.209893	3.73464	0.000278936	0.000929019	protein_coding	16	86544133	86548076	+	forkhead box F1
NARFL	ENSG00000103245	0.13936	4.31155	0.0213409	0.0432104	protein_coding	16	779753	791329	-	cytosolic iron-sulfur assembly component 3
HAGHL	ENSG00000103253	-0.546388	3.86695	4.02089e-18	8.95677e-17	protein_coding	16	776936	785525	+	hydroxyacylglutathione hydrolase like
FAM173A	ENSG00000103254	-0.442445	4.64379	5.31847e-16	9.84683e-15	protein_coding	16	770581	772601	+	adenine nucleotide translocase lysine methyltransferase
SLC7A5	ENSG00000103257	0.617785	6.5717	1.56701e-36	8.46006e-35	protein_coding	16	87863629	87903094	-	solute carrier family 7 member 5
METRN	ENSG00000103260	-0.453116	7.05848	9.97171e-20	2.55063e-18	protein_coding	16	765115	769655	+	meteorin, glial cell differentiation regulator
FBXO31	ENSG00000103264	0.182649	4.27099	0.000605048	0.00187151	protein_coding	16	87360593	87425748	-	F-box protein 31
STUB1	ENSG00000103266	-0.134355	5.27608	0.00608229	0.0144911	protein_coding	16	730224	732870	+	STIP1 homology and U-box containing protein 1
RHBDL1	ENSG00000103269	-0.599088	2.07661	1.30921e-09	1.15098e-08	protein_coding	16	725666	728268	+	rhomboid like 1
CRYM	ENSG00000103316	-1.06977	1.4094	3.90009e-06	1.92215e-05	protein_coding	16	21250195	21314404	-	crystallin mu
CAPN15	ENSG00000103326	0.196879	6.27622	1.62493e-05	7.01179e-05	protein_coding	16	577717	604636	+	calpain 15
PIEZO1	ENSG00000103335	0.221069	7.33126	4.53814e-06	2.19986e-05	protein_coding	16	88781751	88851619	-	piezo type mechanosensitive ion channel component 1
UBFD1	ENSG00000103353	0.112908	6.76899	0.00103576	0.00303079	protein_coding	16	23568392	23585710	+	ubiquitin family domain containing 1
PRSS33	ENSG00000103355	-0.625907	3.64216	7.60796e-06	3.49739e-05	protein_coding	16	2833954	2837949	-	serine protease 33
TCEB2	ENSG00000103363	-0.366381	6.69707	1.20767e-19	3.06687e-18	protein_coding	16	2821415	2827298	-	elongin B
GGA2	ENSG00000103365	0.0985876	5.67297	0.00731622	0.0170829	protein_coding	16	23474863	23533316	-	golgi associated, gamma adaptin ear containing, ARF binding protein 2
DNAJA3	ENSG00000103423	0.254713	6.32912	6.13021e-13	8.20358e-12	protein_coding	16	4475806	4506776	+	DnaJ heat shock protein family (Hsp40) member A3
TOX3	ENSG00000103460	-0.285104	1.75117	0.0137684	0.0295889	protein_coding	16	52471917	52581714	-	TOX high mobility group box family member 3
RBL2	ENSG00000103479	-0.191387	6.1201	1.7205e-06	9.07739e-06	protein_coding	16	53467889	53525561	+	RB transcriptional corepressor like 2
QPRT	ENSG00000103485	-0.575138	2.7656	6.13015e-08	4.18692e-07	protein_coding	16	29674600	29710020	+	quinolinate phosphoribosyltransferase
RPGRIP1L	ENSG00000103494	-0.17347	4.26105	0.000630292	0.0019411	protein_coding	16	53631595	53737850	-	RPGRIP1 like
CDIPT	ENSG00000103502	-0.0948629	6.23076	0.0112413	0.0248063	protein_coding	16	29869678	29875057	-	CDP-diacylglycerol--inositol 3-phosphatidyltransferase
CCP110	ENSG00000103540	0.3651	5.73027	8.15045e-20	2.09997e-18	protein_coding	16	19535133	19564730	+	centriolar coiled-coil protein 110
RNF40	ENSG00000103549	0.198106	6.98121	3.78743e-09	3.12381e-08	protein_coding	16	30773066	30787628	+	ring finger protein 40
LACTB	ENSG00000103642	-0.384139	3.2681	8.1838e-06	3.74143e-05	protein_coding	15	63413999	63434260	+	lactamase beta
CORO2B	ENSG00000103647	0.216657	6.37961	1.06476e-08	8.23906e-08	protein_coding	15	68871308	69020145	+	coronin 2B
CSK	ENSG00000103653	0.100652	6.4734	0.014102	0.0301728	protein_coding	15	75074398	75095539	+	C-terminal Src kinase
IGDCC4	ENSG00000103742	-0.28247	1.63372	0.018751	0.038581	protein_coding	15	65673802	65715410	-	immunoglobulin superfamily DCC subclass member 4
TTC23	ENSG00000103852	0.166668	4.30504	0.00239201	0.00638036	protein_coding	15	99676528	99791428	-	tetratricopeptide repeat domain 23
FAH	ENSG00000103876	-0.251364	4.79218	1.97415e-07	1.23286e-06	protein_coding	15	80444832	80479288	+	fumarylacetoacetate hydrolase
KIAA1199	ENSG00000103888	-0.50607	2.67236	4.48687e-09	3.64961e-08	protein_coding	15	81071684	81244117	+	cell migration inducing hyaluronidase 1
HOMER2	ENSG00000103942	-0.268289	6.50659	8.56424e-11	8.86831e-10	protein_coding	15	83509838	83654661	-	homer scaffold protein 2
EHD4	ENSG00000103966	0.590698	6.76003	1.92383e-54	1.47095e-52	protein_coding	15	42190950	42264776	-	EH domain containing 4
TMEM87A	ENSG00000103978	0.184773	6.00486	1.76467e-06	9.29307e-06	protein_coding	15	42502730	42565861	-	transmembrane protein 87A
CEP152	ENSG00000103995	0.224921	4.98082	0.000115617	0.000418474	protein_coding	15	49005125	49103343	-	centrosomal protein 152
GABPB1	ENSG00000104064	-0.135271	4.66848	0.00594143	0.0141938	protein_coding	15	50569389	50647605	-	GA binding protein transcription factor subunit beta 1
TJP1	ENSG00000104067	0.152469	6.85214	8.73176e-05	0.000323835	protein_coding	15	29991571	30261068	-	tight junction protein 1
BMF	ENSG00000104081	-0.678563	1.293	1.27903e-06	6.94241e-06	protein_coding	15	40380091	40401093	-	Bcl2 modifying factor
EIF3J	ENSG00000104131	0.131769	6.24801	0.0016662	0.00462125	protein_coding	15	44829255	44855227	+	eukaryotic translation initiation factor 3 subunit J
SPG11	ENSG00000104133	0.16742	6.23055	5.14318e-06	2.46778e-05	protein_coding	15	44854894	44955876	-	SPG11 vesicle trafficking associated, spatacsin
VPS18	ENSG00000104142	0.163673	5.56558	0.000384967	0.00124352	protein_coding	15	41186628	41196173	+	VPS18 core subunit of CORVET and HOPS complexes
SLC30A4	ENSG00000104154	0.427732	3.44752	9.314e-10	8.3915e-09	protein_coding	15	45771809	45815005	-	solute carrier family 30 member 4
BLOC1S6	ENSG00000104164	-0.245614	6.05948	6.0122e-11	6.337e-10	protein_coding	15	45879321	45908197	+	biogenesis of lysosomal organelles complex 1 subunit 6
MYEF2	ENSG00000104177	-0.124971	5.97617	0.00129678	0.00369595	protein_coding	15	48431625	48470714	-	myelin expression factor 2
PDGFRL	ENSG00000104213	0.523624	1.98065	0.000109415	0.000397756	protein_coding	8	17433942	17501580	+	platelet derived growth factor receptor like
ZDHHC2	ENSG00000104219	-0.154022	6.66781	0.000180341	0.000628924	protein_coding	8	17013538	17082308	+	zinc finger DHHC-type palmitoyltransferase 2
BRF2	ENSG00000104221	0.192298	3.03609	0.0167738	0.0350156	protein_coding	8	37700786	37707422	-	BRF2 RNA polymerase III transcription initiation factor subunit
TRIM35	ENSG00000104228	0.296396	4.64018	4.89436e-08	3.40702e-07	protein_coding	8	27142404	27168836	-	tripartite motif containing 35
CA2	ENSG00000104267	-0.467645	5.18899	1.21221e-25	4.51231e-24	protein_coding	8	86376081	86393722	+	carbonic anhydrase 2
NBN	ENSG00000104320	0.325934	5.88107	4.01077e-17	8.25799e-16	protein_coding	8	90945564	91015456	-	nibrin
DECR1	ENSG00000104325	-0.17984	5.42409	1.74411e-05	7.49407e-05	protein_coding	8	91013633	91064320	+	2,4-dienoyl-CoA reductase 1
CALB1	ENSG00000104327	0.128846	6.57882	0.000708828	0.00215482	protein_coding	8	91070836	91107703	-	calbindin 1
IMPAD1	ENSG00000104331	-0.153038	7.6678	4.11088e-05	0.000163247	protein_coding	8	57870492	57906403	-	inositol monophosphatase domain containing 1
SFRP1	ENSG00000104332	0.312206	7.88067	4.87491e-13	6.61762e-12	protein_coding	8	41119481	41167016	-	secreted frizzled related protein 1
LAPTM4B	ENSG00000104341	-0.24207	5.7752	6.40854e-10	5.89394e-09	protein_coding	8	98787285	98865241	+	lysosomal protein transmembrane 4 beta
UBE2W	ENSG00000104343	0.112976	4.7224	0.019073	0.0391394	protein_coding	8	74692332	74791145	-	ubiquitin conjugating enzyme E2 W
POP1	ENSG00000104356	0.336854	4.82224	1.03679e-09	9.24675e-09	protein_coding	8	99129525	99172062	+	POP1 homolog, ribonuclease P/MRP subunit
PLAT	ENSG00000104368	0.236639	9.83434	1.23602e-10	1.24971e-09	protein_coding	8	42032236	42065242	-	plasminogen activator, tissue type
RAB2A	ENSG00000104388	-0.0953299	6.71237	0.0128845	0.0279227	protein_coding	8	61429416	61536186	+	RAB2A, member RAS oncogene family
NDRG1	ENSG00000104419	0.151672	5.05695	0.00514174	0.0125181	protein_coding	8	134249414	134314265	-	N-myc downstream regulated 1
IL7	ENSG00000104432	0.892825	1.60457	1.4564e-13	2.08299e-12	protein_coding	8	79587978	79717758	-	interleukin 7
SPAG1	ENSG00000104450	0.281081	4.68469	2.2502e-09	1.90479e-08	protein_coding	8	101170134	101271506	+	sperm associated antigen 1
NCALD	ENSG00000104490	-0.701254	0.320307	0.00355405	0.00903199	protein_coding	8	102698771	103137135	-	neurocalcin delta
GSDMD	ENSG00000104518	0.501321	4.95083	5.39793e-27	2.10341e-25	protein_coding	8	144635377	144645232	+	gasdermin D
TSTA3	ENSG00000104522	-0.430214	4.92729	1.28473e-21	3.77807e-20	protein_coding	8	144694788	144700218	-	tissue specific transplantation antigen P35B
PYCRL	ENSG00000104524	-0.221745	3.59042	0.00349971	0.0089083	protein_coding	8	144686083	144691943	-	pyrroline-5-carboxylate reductase 3
SQLE	ENSG00000104549	-0.148641	5.28065	0.000490322	0.00154951	protein_coding	8	126010739	126034525	+	squalene epoxidase
SH2D4A	ENSG00000104611	0.197465	5.30172	1.60968e-05	6.95448e-05	protein_coding	8	19171128	19253729	+	SH2 domain containing 4A
LEPROTL1	ENSG00000104660	0.080884	6.37204	0.0235547	0.0470927	protein_coding	8	29952914	30034724	+	leptin receptor overlapping transcript like 1
R3HCC1	ENSG00000104679	-0.17007	5.02983	0.000733136	0.00222298	protein_coding	8	23127633	23153792	+	R3H domain and coiled-coil containing 1
GSR	ENSG00000104687	0.181719	6.39701	1.33392e-06	7.2133e-06	protein_coding	8	30535583	30585443	-	glutathione-disulfide reductase
TNFRSF10A	ENSG00000104689	0.642573	2.93517	1.84241e-18	4.2238e-17	protein_coding	8	23047965	23082639	-	TNF receptor superfamily member 10a
NEFM	ENSG00000104722	-0.510341	0.589718	0.00198614	0.00540893	protein_coding	8	24770525	24776607	+	neurofilament medium
MCM4	ENSG00000104738	0.270613	7.77034	9.30731e-11	9.56077e-10	protein_coding	8	48872745	48890720	+	minichromosome maintenance complex component 4
KCTD9	ENSG00000104756	0.166076	6.19809	2.33253e-05	9.78458e-05	protein_coding	8	25285366	25315992	-	potassium channel tetramerization domain containing 9
ASAH1	ENSG00000104763	-0.0992667	6.86668	0.00612202	0.0145662	protein_coding	8	17913934	17942494	-	N-acylsphingosine amidohydrolase 1
BNIP3L	ENSG00000104765	-0.368661	5.99885	2.55403e-11	2.84016e-10	protein_coding	8	26240414	26363152	+	BCL2 interacting protein 3 like
KCNN4	ENSG00000104783	0.299732	5.99285	6.76936e-14	1.0037e-12	protein_coding	19	44270685	44285409	-	potassium calcium-activated channel subfamily N member 4
ECH1	ENSG00000104823	-0.428542	4.57897	1.43201e-14	2.27082e-13	protein_coding	19	39306062	39322645	-	enoyl-CoA hydratase 1
HNRNPL	ENSG00000104824	0.090583	7.73663	0.0188165	0.0386833	protein_coding	19	39327028	39342987	-	heterogeneous nuclear ribonucleoprotein L
TUBB4A	ENSG00000104833	-0.250443	2.99469	0.000432669	0.00138089	protein_coding	19	6494330	6502859	-	tubulin beta 4A class IVa
CLPTM1	ENSG00000104853	0.123563	7.47548	0.00443203	0.0109907	protein_coding	19	45457842	45496599	+	CLPTM1 regulator of GABA type A receptor forward trafficking
RELB	ENSG00000104856	0.226412	2.86534	0.00329026	0.00844199	protein_coding	19	45504688	45541452	+	RELB proto-oncogene, NF-kB subunit
CLASRP	ENSG00000104859	-0.22242	4.73809	5.03961e-06	2.42138e-05	protein_coding	19	45542298	45574214	+	CLK4 associating serine/arginine rich protein
FCGRT	ENSG00000104870	-0.191473	5.78372	0.000154847	0.000547441	protein_coding	19	50010073	50029590	+	Fc fragment of IgG receptor and transporter
PIH1D1	ENSG00000104872	-0.126866	5.38647	0.00291138	0.00757709	protein_coding	19	49949555	49956754	-	PIH1 domain containing 1
ARHGEF18	ENSG00000104880	0.250053	4.87211	4.52989e-08	3.17361e-07	protein_coding	19	7459999	7537363	+	Rho/Rac guanine nucleotide exchange factor 18
ERCC2	ENSG00000104884	-0.174612	3.71165	0.00477284	0.0117269	protein_coding	19	45853095	45874176	-	ERCC excision repair 2, TFIIH core complex helicase subunit
RNASEH2A	ENSG00000104889	0.185622	5.80896	0.000143377	0.000510976	protein_coding	19	12917394	12924452	+	ribonuclease H2 subunit A
OAZ1	ENSG00000104904	-0.0923521	8.50085	0.00413454	0.0103218	protein_coding	19	2269485	2273487	+	ornithine decarboxylase antizyme 1
STX10	ENSG00000104915	-0.220366	5.83666	1.64844e-07	1.04421e-06	protein_coding	19	13254872	13261197	-	syntaxin 10
TBC1D17	ENSG00000104946	-0.209464	4.55646	4.74082e-05	0.000185656	protein_coding	19	50380682	50392005	+	TBC1 domain family member 17
IL4I1	ENSG00000104951	2.98799	1.24626	2.81545e-81	2.78494e-79	protein_coding	19	50392911	50432796	-	interleukin 4 induced 1
NOVA2	ENSG00000104967	-0.187934	3.93026	0.00312376	0.00806601	protein_coding	19	46436992	46476804	-	NOVA alternative splicing regulator 2
MED25	ENSG00000104973	0.29114	5.0319	4.08083e-11	4.40973e-10	protein_coding	19	50321539	50342073	+	mediator complex subunit 25
C19orf53	ENSG00000104979	-0.21986	6.2938	3.44757e-10	3.27948e-09	protein_coding	19	13884982	13889276	+	chromosome 19 open reading frame 53
ASF1B	ENSG00000105011	0.473222	6.65821	2.73423e-22	8.44448e-21	protein_coding	19	14230321	14247768	-	anti-silencing function 1B histone chaperone
TNNT1	ENSG00000105048	-0.230967	2.10833	0.0126613	0.0275021	protein_coding	19	55644162	55660722	-	troponin T1, slow skeletal type
PPP6R1	ENSG00000105063	0.120366	7.47835	0.000834003	0.00249671	protein_coding	19	55741148	55770363	-	protein phosphatase 6 regulatory subunit 1
C19orf44	ENSG00000105072	0.252477	3.06689	0.00154207	0.00431505	protein_coding	19	16607122	16632163	+	chromosome 19 open reading frame 44
CCNE1	ENSG00000105173	0.187294	4.15001	0.000827065	0.00247804	protein_coding	19	30302805	30315215	+	cyclin E1
RPS16	ENSG00000105193	-0.27557	8.45784	1.69639e-16	3.30972e-15	protein_coding	19	39923847	39926588	-	ribosomal protein S16
TIMM50	ENSG00000105197	-0.142959	6.30988	7.21927e-05	0.000272238	protein_coding	19	39971052	39984422	+	translocase of inner mitochondrial membrane 50
DYRK1B	ENSG00000105204	-0.451482	4.53164	4.04161e-09	3.30837e-08	protein_coding	19	40315990	40324841	-	dual specificity tyrosine phosphorylation regulated kinase 1B
PLD3	ENSG00000105223	-0.168504	7.72729	2.57402e-05	0.000106773	protein_coding	19	40854363	40886346	+	phospholipase D family member 3
NUMBL	ENSG00000105245	-0.134579	4.87586	0.00266688	0.00702478	protein_coding	19	41172596	41196877	-	NUMB like endocytic adaptor protein
EBI3	ENSG00000105246	0.452873	2.10647	0.0010998	0.00319833	protein_coding	19	4229495	4237528	+	Epstein-Barr virus induced 3
TBCB	ENSG00000105254	-0.31738	6.06197	9.17717e-16	1.64318e-14	protein_coding	19	36605191	36616849	+	tubulin folding cofactor B
POLR2I	ENSG00000105258	-0.18015	3.31206	0.00626672	0.0148653	protein_coding	19	36604612	36606248	-	RNA polymerase II subunit I
CLIP3	ENSG00000105270	-0.446611	5.93175	1.24279e-16	2.45177e-15	protein_coding	19	36505562	36524245	-	CAP-Gly domain containing linker protein 3
SLC1A5	ENSG00000105281	0.22565	6.72725	2.01896e-07	1.25807e-06	protein_coding	19	47278140	47291851	-	solute carrier family 1 member 5
PRKD2	ENSG00000105287	0.770349	5.59486	2.60794e-63	2.1828e-61	protein_coding	19	47177532	47220384	-	protein kinase D2
APLP1	ENSG00000105290	-0.103702	5.43415	0.010564	0.0235134	protein_coding	19	36358801	36370693	+	amyloid beta precursor like protein 1
BBC3	ENSG00000105327	-0.249863	2.61499	0.00228499	0.00612609	protein_coding	19	47724081	47736023	-	BCL2 binding component 3
RPS19	ENSG00000105372	-0.151381	8.43059	7.74888e-05	0.000290352	protein_coding	19	42363988	42376994	+	ribosomal protein S19
GLTSCR2	ENSG00000105373	-0.198127	5.13892	4.71852e-05	0.000184885	protein_coding	19	48248779	48260315	+	NOP53 ribosome biogenesis factor
ICAM5	ENSG00000105376	-0.303154	1.65524	0.00590015	0.0140999	protein_coding	19	10400657	10407454	+	intercellular adhesion molecule 5
ETFB	ENSG00000105379	-0.245154	2.24421	0.0082168	0.0188588	protein_coding	19	51848423	51869672	-	electron transfer flavoprotein subunit beta
NAPA	ENSG00000105402	0.541699	5.96131	3.5525e-41	2.16596e-39	protein_coding	19	47990894	48018497	-	NSF attachment protein alpha
MEIS3	ENSG00000105419	-0.241963	2.7317	0.00610503	0.0145355	protein_coding	19	47906381	47922780	-	Meis homeobox 3
PTPRS	ENSG00000105426	-0.101015	7.20408	0.00272675	0.00716645	protein_coding	19	5158506	5340814	-	protein tyrosine phosphatase receptor type S
MEGF8	ENSG00000105429	-0.128273	7.53788	0.00217399	0.00585288	protein_coding	19	42829761	42882921	+	multiple EGF like domains 8
CYTH2	ENSG00000105443	-0.263811	5.2169	3.01394e-10	2.8864e-09	protein_coding	19	48972289	48985571	+	cytohesin 2
GRWD1	ENSG00000105447	0.267084	4.88051	3.22512e-09	2.67719e-08	protein_coding	19	48949030	48960279	+	glutamate rich WD repeat containing 1
CARD8	ENSG00000105483	0.306539	4.81571	3.07714e-12	3.8248e-11	protein_coding	19	48684027	48759203	-	caspase recruitment domain family member 8
LIG1	ENSG00000105486	0.120431	5.71636	0.022221	0.0447872	protein_coding	19	48618702	48673860	-	DNA ligase 1
DBP	ENSG00000105516	-0.478566	4.37111	3.47781e-13	4.77144e-12	protein_coding	19	49133287	49140695	-	D-box binding PAR bZIP transcription factor
TMEM205	ENSG00000105518	-0.224229	3.59471	0.00376226	0.00950306	protein_coding	19	11453452	11457194	-	transmembrane protein 205
CAPS	ENSG00000105519	-0.304632	4.8864	5.81087e-09	4.66221e-08	protein_coding	19	5911718	5915888	+	calcyphosine
DKFZP761J1410	ENSG00000105520	-0.286218	5.26841	1.23146e-08	9.39537e-08	protein_coding	19	11466062	11476374	+	phospholipid phosphatase related 2
BCAT2	ENSG00000105552	-0.300027	4.42252	1.89299e-07	1.18742e-06	protein_coding	19	49298319	49314286	-	branched chain amino acid transaminase 2
MIER2	ENSG00000105556	0.353954	4.72701	3.04856e-15	5.15812e-14	protein_coding	19	305575	344798	-	MIER family member 2
PLEKHA4	ENSG00000105559	2.04563	3.90897	1.71798e-154	2.64139e-152	protein_coding	19	49340354	49371889	-	pleckstrin homology domain containing A4
PPP2R1A	ENSG00000105568	-0.0889844	8.05109	0.0174874	0.036307	protein_coding	19	52693292	52730687	+	protein phosphatase 2 scaffold subunit Aalpha
TNPO2	ENSG00000105576	0.12647	7.53936	0.000431514	0.00137751	protein_coding	19	12810008	12834825	-	transportin 2
WDR83OS	ENSG00000105583	-0.220461	5.00116	2.37599e-06	1.22047e-05	protein_coding	19	12778885	12782170	-	WD repeat domain 83 opposite strand
CACNG7	ENSG00000105605	-0.170032	3.83703	0.0183075	0.0378208	protein_coding	19	54412589	54447195	+	calcium voltage-gated channel auxiliary subunit gamma 7
GCDH	ENSG00000105607	-0.278164	3.66411	8.74942e-06	3.97944e-05	protein_coding	19	13001840	13025021	+	glutaryl-CoA dehydrogenase
DNASE2	ENSG00000105612	0.115334	5.33233	0.00657306	0.0154997	protein_coding	19	12986025	12992282	-	deoxyribonuclease 2, lysosomal
PRPF31	ENSG00000105618	-0.161772	5.11603	0.00025234	0.000849844	protein_coding	19	54618837	54635140	+	pre-mRNA processing factor 31
RPL18A	ENSG00000105640	-0.206425	8.21228	7.43483e-07	4.20158e-06	protein_coding	19	17970685	17974962	+	ribosomal protein L18a
ARRDC2	ENSG00000105643	0.282962	3.87332	7.33246e-06	3.37872e-05	protein_coding	19	18111941	18124911	+	arrestin domain containing 2
ISYNA1	ENSG00000105655	-0.312868	5.33319	1.26092e-07	8.14413e-07	protein_coding	19	18545198	18549111	-	inositol-3-phosphate synthase 1
COPE	ENSG00000105669	-0.0888712	5.99464	0.0227361	0.0456708	protein_coding	19	19010323	19030206	-	coatomer protein complex subunit epsilon
TMEM147	ENSG00000105677	-0.281127	6.16038	2.64623e-13	3.69141e-12	protein_coding	19	36036497	36038428	+	transmembrane protein 147
TMEM59L	ENSG00000105696	-0.393285	2.26233	1.45306e-05	6.32221e-05	protein_coding	19	18718240	18731849	+	transmembrane protein 59 like
USF2	ENSG00000105698	-0.158785	6.62843	8.15545e-05	0.000304216	protein_coding	19	35759881	35770724	+	upstream transcription factor 2, c-fos interacting
KXD1	ENSG00000105700	-0.119163	5.54056	0.00212928	0.00575223	protein_coding	19	18668572	18680197	+	KxDL motif containing 1
FKBP8	ENSG00000105701	-0.178332	7.73931	3.49351e-07	2.08946e-06	protein_coding	19	18642561	18654887	-	FKBP prolyl isomerase 8
ZNF85	ENSG00000105750	0.29786	2.87653	0.000240023	0.000813397	protein_coding	19	21106028	21133503	+	zinc finger protein 85
CADM4	ENSG00000105767	-0.292436	5.13954	2.99589e-08	2.15789e-07	protein_coding	19	44126520	44143991	-	cell adhesion molecule 4
AVL9	ENSG00000105778	0.128049	6.74303	0.000192739	0.000668044	protein_coding	7	32535038	33078516	+	AVL9 cell migration associated
RUNDC3B	ENSG00000105784	-0.623542	0.797361	6.70248e-05	0.000254788	protein_coding	7	87256864	87461611	+	RUN domain containing 3B
C7orf63	ENSG00000105792	-0.520199	1.75091	5.07743e-05	0.000197471	protein_coding	7	89874488	89940377	+	cilia and flagella associated protein 69
GTPBP10	ENSG00000105793	0.153254	4.55981	0.00220374	0.00592733	protein_coding	7	89964537	90020769	+	GTP binding protein 10
CDK6	ENSG00000105810	-0.13017	8.66916	2.85208e-05	0.000116935	protein_coding	7	92234235	92465908	-	cyclin dependent kinase 6
DNAJC2	ENSG00000105821	0.258351	5.34175	7.19884e-08	4.84432e-07	protein_coding	7	102952921	102985320	-	DnaJ heat shock protein family (Hsp40) member C2
TFPI2	ENSG00000105825	0.329117	6.73241	1.20049e-15	2.11733e-14	protein_coding	7	93514709	93520303	-	tissue factor pathway inhibitor 2
NAMPT	ENSG00000105835	0.228939	7.04855	3.21737e-11	3.52242e-10	protein_coding	7	105888731	105926772	-	nicotinamide phosphoribosyltransferase
HBP1	ENSG00000105856	-0.28246	4.8309	0.000254986	0.000858142	protein_coding	7	106809406	106842974	+	HMG-box transcription factor 1
CBLL1	ENSG00000105879	0.118454	5.6611	0.00306931	0.00794581	protein_coding	7	107384142	107402112	+	Cbl proto-oncogene like 1
MTPN	ENSG00000105887	-0.171221	7.89166	9.94053e-08	6.5278e-07	protein_coding	7	135611509	135662101	-	myotrophin
PTN	ENSG00000105894	0.648394	7.75818	1.53012e-82	1.53501e-80	protein_coding	7	136912088	137028611	-	pleiotrophin
DFNA5	ENSG00000105928	-0.177154	5.52022	2.14174e-06	1.11093e-05	protein_coding	7	24737972	24809244	-	gasdermin E
ZC3HAV1	ENSG00000105939	0.787209	7.12753	1.06166e-104	1.25143e-102	protein_coding	7	138728266	138794465	-	zinc finger CCCH-type containing, antiviral 1
OGDH	ENSG00000105953	0.186215	7.9832	1.68713e-06	8.92129e-06	protein_coding	7	44646171	44748665	+	oxoglutarate dehydrogenase
H2AFV	ENSG00000105968	-0.292162	7.96976	1.47151e-18	3.41222e-17	protein_coding	7	44866390	44887682	-	H2A.Z variant histone 2
CAV1	ENSG00000105974	0.100353	10.1469	0.0048464	0.0118911	protein_coding	7	116164839	116201233	+	caveolin 1
MET	ENSG00000105976	0.145229	9.1872	0.000261775	0.000878276	protein_coding	7	116312444	116438440	+	MET proto-oncogene, receptor tyrosine kinase
LMBR1	ENSG00000105983	-0.130184	6.88698	0.000270539	0.000903395	protein_coding	7	156461646	156685924	-	limb development membrane protein 1
SSBP1	ENSG00000106028	-0.100497	6.42572	0.00857098	0.0195574	protein_coding	7	141438121	141487722	+	single stranded DNA binding protein 1
CPED1	ENSG00000106034	0.291469	3.92842	3.0191e-07	1.82189e-06	protein_coding	7	120628731	120937498	+	cadherin like and PC-esterase domain containing 1
HIBADH	ENSG00000106049	-0.23721	5.97902	2.21786e-09	1.88079e-08	protein_coding	7	27565061	27702614	-	3-hydroxyisobutyrate dehydrogenase
ABHD11	ENSG00000106077	-0.136564	4.82661	0.00338465	0.00865436	protein_coding	7	73150424	73153197	-	abhydrolase domain containing 11
PLEKHA8	ENSG00000106086	0.196441	5.06618	9.58927e-06	4.32388e-05	protein_coding	7	30067020	30170096	+	pleckstrin homology domain containing A8
STX1A	ENSG00000106089	-0.109386	6.70363	0.00236446	0.00631521	protein_coding	7	73113536	73134002	-	syntaxin 1A
NOD1	ENSG00000106100	0.350554	3.2181	2.33358e-05	9.78609e-05	protein_coding	7	30464143	30518400	-	nucleotide binding oligomerization domain containing 1
GARS	ENSG00000106105	0.140647	7.88383	0.000156931	0.000553979	protein_coding	7	30634297	30673649	+	glycyl-tRNA synthetase 1
CASP2	ENSG00000106144	0.245875	6.12861	5.0877e-09	4.10762e-08	protein_coding	7	142985308	143004789	+	caspase 2
CHCHD2	ENSG00000106153	-0.182676	8.2193	4.22527e-07	2.48819e-06	protein_coding	7	56169262	56174269	-	coiled-coil-helix-coiled-coil-helix domain containing 2
HSPB1	ENSG00000106211	0.146911	9.18015	2.35665e-05	9.87859e-05	protein_coding	7	75931861	75933612	+	heat shock protein family B (small) member 1
NUDT1	ENSG00000106268	-0.188809	4.87221	0.000155563	0.000549836	protein_coding	7	2281857	2290781	+	nudix hydrolase 1
PTPRZ1	ENSG00000106278	-0.310814	6.61133	6.53692e-06	3.05063e-05	protein_coding	7	121513143	121702090	+	protein tyrosine phosphatase receptor type Z1
WASL	ENSG00000106299	0.0986563	6.31302	0.00686412	0.0161364	protein_coding	7	123321989	123389121	-	WASP like actin nucleation promoting factor
MOSPD3	ENSG00000106330	-0.500948	4.32947	3.30098e-20	8.77676e-19	protein_coding	7	100209725	100213007	+	motile sperm domain containing 3
PCOLCE	ENSG00000106333	-0.145745	4.48529	0.0105235	0.0234306	protein_coding	7	100199800	100205798	+	procollagen C-endopeptidase enhancer
USP42	ENSG00000106346	0.338532	5.045	4.99692e-16	9.27578e-15	protein_coding	7	6144515	6201195	+	ubiquitin specific peptidase 42
IMPDH1	ENSG00000106348	-0.109753	5.9597	0.00716815	0.016787	protein_coding	7	128032331	128050306	-	inosine monophosphate dehydrogenase 1
AGFG2	ENSG00000106351	0.17139	4.4008	0.000670276	0.00204818	protein_coding	7	100136834	100165842	+	ArfGAP with FG repeats 2
LSM5	ENSG00000106355	-0.0988327	5.936	0.0107273	0.0238151	protein_coding	7	32524951	32534895	-	LSM5 homolog, U6 small nuclear RNA and mRNA degradation associated
SERPINE1	ENSG00000106366	0.29296	11.2826	4.50225e-12	5.45709e-11	protein_coding	7	100770370	100782547	+	serpin family E member 1
AP1S1	ENSG00000106367	-0.140163	6.49073	3.28443e-05	0.000133156	protein_coding	7	100797678	100804877	+	adaptor related protein complex 1 subunit sigma 1
C1GALT1	ENSG00000106392	0.14824	5.06349	0.00174672	0.00482001	protein_coding	7	7196565	7288282	+	core 1 synthase, glycoprotein-N-acetylgalactosamine 3-beta-galactosyltransferase 1
PLOD3	ENSG00000106397	0.224981	8.74604	1.93326e-08	1.43323e-07	protein_coding	7	100849258	100861701	-	procollagen-lysine,2-oxoglutarate 5-dioxygenase 3
ZNHIT1	ENSG00000106400	-0.306513	6.08911	8.84922e-19	2.07927e-17	protein_coding	7	100860949	100867471	+	zinc finger HIT-type containing 1
EZH2	ENSG00000106462	0.354473	6.78534	1.56521e-17	3.32432e-16	protein_coding	7	148504475	148581413	-	enhancer of zeste 2 polycomb repressive complex 2 subunit
SFRP4	ENSG00000106483	-1.09772	1.33919	2.81174e-11	3.1072e-10	protein_coding	7	37945543	38065297	-	secreted frizzled related protein 4
MEST	ENSG00000106484	0.207219	7.29797	2.86852e-06	1.45015e-05	protein_coding	7	130126012	130146133	+	mesoderm specific transcript
ANKMY2	ENSG00000106524	0.154523	5.34109	0.000152394	0.000540255	protein_coding	7	16639401	16685442	-	ankyrin repeat and MYND domain containing 2
RARRES2	ENSG00000106538	0.284535	5.80902	2.68371e-10	2.59475e-09	protein_coding	7	150035408	150038763	-	retinoic acid receptor responder 2
GIMAP2	ENSG00000106560	1.33239	1.80787	4.02747e-31	1.86782e-29	protein_coding	7	150382785	150390729	+	GTPase, IMAP family member 2
COA1	ENSG00000106603	-0.160844	6.90783	9.84367e-06	4.4259e-05	protein_coding	7	43648055	43769316	-	cytochrome c oxidase assembly factor 1 homolog
BLVRA	ENSG00000106605	-0.109847	5.57509	0.00567768	0.0136282	protein_coding	7	43798279	43846939	+	biliverdin reductase A
URGCP	ENSG00000106608	0.192481	6.03886	1.33485e-06	7.21491e-06	protein_coding	7	43915493	43966010	-	upregulator of cell proliferation
STAG3L4	ENSG00000106610	-0.160566	3.95592	0.0046674	0.0115058	pseudogene	7	66767608	66786513	+
PRKAG2	ENSG00000106617	-0.25597	5.25277	3.24249e-07	1.94839e-06	protein_coding	7	151253197	151574210	-	protein kinase AMP-activated non-catalytic subunit gamma 2
AEBP1	ENSG00000106624	0.24659	4.33799	7.32556e-06	3.37745e-05	protein_coding	7	44143960	44154161	+	AE binding protein 1
POLD2	ENSG00000106628	-0.281904	7.53445	1.01678e-14	1.63808e-13	protein_coding	7	44154286	44163957	-	DNA polymerase delta 2, accessory subunit
YKT6	ENSG00000106636	-0.120211	7.67039	0.000403665	0.00129651	protein_coding	7	44240567	44253893	+	YKT6 v-SNARE homolog
CLIP2	ENSG00000106665	-0.0912264	6.54998	0.0179954	0.0372469	protein_coding	7	73703805	73820273	+	CAP-Gly domain containing linker protein 2
LIMK1	ENSG00000106683	-0.139995	8.30727	7.82084e-06	3.5836e-05	protein_coding	7	73497263	73536855	+	LIM domain kinase 1
CNTNAP3	ENSG00000106714	-0.141886	4.88656	0.00251155	0.00666652	protein_coding	9	39072764	39288312	-	contactin associated protein like 3
TMEM245	ENSG00000106771	0.310982	7.65497	1.24869e-21	3.67974e-20	protein_coding	9	111777432	111882225	-	transmembrane protein 245
PRUNE2	ENSG00000106772	-0.590315	4.20674	5.80405e-21	1.60977e-19	protein_coding	9	79226292	79521003	-	prune homolog 2 with BCH domain
MEGF9	ENSG00000106780	-0.135735	5.40542	0.000623659	0.00192361	protein_coding	9	123363091	123476748	-	multiple EGF like domains 9
TRIM14	ENSG00000106785	1.72607	7.78202	0	0	protein_coding	9	100831557	100881494	-	tripartite motif containing 14
CORO2A	ENSG00000106789	0.531467	4.82433	1.56945e-34	8.19182e-33	protein_coding	9	100883257	100954922	-	coronin 2A
TGFBR1	ENSG00000106799	-0.459545	6.83205	7.73919e-31	3.54275e-29	protein_coding	9	101866320	101916474	+	transforming growth factor beta receptor 1
SEC61B	ENSG00000106803	-0.185081	5.84783	3.64835e-06	1.8044e-05	protein_coding	9	101984346	101992897	+	SEC61 translocon beta subunit
PTGR1	ENSG00000106853	0.139978	6.29006	0.00111952	0.00324899	protein_coding	9	114312002	114362135	-	prostaglandin reductase 1
SUSD1	ENSG00000106868	0.205403	3.82794	0.000327112	0.00107355	protein_coding	9	114803065	114937688	-	sushi domain containing 1
AKNA	ENSG00000106948	0.315099	5.03668	2.70747e-09	2.27014e-08	protein_coding	9	117096436	117156685	-	AT-hook transcription factor
DNM1	ENSG00000106976	-0.155329	5.49556	0.00355992	0.00904527	protein_coding	9	130965658	131017527	+	dynamin 1
ENG	ENSG00000106991	0.312671	6.39483	4.53224e-14	6.82732e-13	protein_coding	9	130577291	130617035	-	endoglin
PLGRKT	ENSG00000107020	-0.124469	4.28122	0.0243478	0.0485229	protein_coding	9	5357973	5437878	-	plasminogen receptor with a C-terminal lysine
TBC1D13	ENSG00000107021	0.106277	5.787	0.00468325	0.011542	protein_coding	9	131549483	131572711	+	TBC1 domain family member 13
KIAA1432	ENSG00000107036	0.108712	5.31835	0.00478023	0.011743	protein_coding	9	5629025	5776557	+	RIC1 homolog, RAB6A GEF complex partner 1
KDM4C	ENSG00000107077	-0.128293	4.16357	0.0234862	0.046969	protein_coding	9	6720863	7175648	+	lysine demethylase 4C
KANK1	ENSG00000107104	0.0905689	6.82259	0.0075637	0.017565	protein_coding	9	470291	746105	+	KN motif and ankyrin repeat domains 1
FUBP3	ENSG00000107164	-0.140571	6.59216	0.000182197	0.000634774	protein_coding	9	133454352	133513739	+	far upstream element binding protein 3
CREB3	ENSG00000107175	-0.0948339	6.33423	0.00616362	0.0146504	protein_coding	9	35732332	35737001	+	cAMP responsive element binding protein 3
MPDZ	ENSG00000107186	-0.14842	5.30053	0.000268494	0.000897199	protein_coding	9	13105703	13279589	-	multiple PDZ domain crumbs cell polarity complex component
DDX58	ENSG00000107201	3.45008	7.26774	0	0	protein_coding	9	32455300	32526322	-	DExD/H-box helicase 58
GLIS3	ENSG00000107249	-0.247215	7.09885	1.76194e-12	2.2473e-11	protein_coding	9	3824127	4348392	-	GLIS family zinc finger 3
RAPGEF1	ENSG00000107263	0.152169	7.2592	3.81716e-06	1.8846e-05	protein_coding	9	134452157	134615461	-	Rap guanine nucleotide exchange factor 1
APBA1	ENSG00000107282	-0.310422	2.20195	0.00140431	0.00396645	protein_coding	9	72042446	72287222	-	amyloid beta precursor protein binding family A member 1
SETX	ENSG00000107290	0.232857	6.87489	1.0079e-08	7.82051e-08	protein_coding	9	135136743	135230372	-	senataxin
ABCA2	ENSG00000107331	-0.251707	6.22198	5.66711e-10	5.22904e-09	protein_coding	9	139901686	139923367	-	ATP binding cassette subfamily A member 2
SHB	ENSG00000107338	0.194314	5.48354	3.77173e-07	2.24259e-06	protein_coding	9	37919131	38069210	-	SH2 domain containing adaptor protein B
UBE2R2	ENSG00000107341	0.135113	7.04429	0.000226649	0.000773263	protein_coding	9	33817565	33920402	+	ubiquitin conjugating enzyme E2 R2
ABHD17B	ENSG00000107362	0.187434	4.45205	0.00142969	0.00403009	protein_coding	9	74477368	74525847	-	abhydrolase domain containing 17B
DVL1	ENSG00000107404	0.177085	6.99482	6.24198e-06	2.93472e-05	protein_coding	1	1270656	1284730	-	dishevelled segment polarity protein 1
PDLIM1	ENSG00000107438	0.238502	7.17518	5.69946e-11	6.04323e-10	protein_coding	10	96997329	97050781	-	PDZ and LIM domain 1
GATA3	ENSG00000107485	0.136331	5.64925	0.00217314	0.00585171	protein_coding	10	8095567	8117161	+	GATA binding protein 3
ATRNL1	ENSG00000107518	-0.413538	4.36591	1.69536e-10	1.68998e-09	protein_coding	10	116853124	117708503	+	attractin like 1
HPS1	ENSG00000107521	-0.169966	6.23116	1.17346e-05	5.20331e-05	protein_coding	10	100175955	100206684	-	HPS1 biogenesis of lysosomal organelles complex 3 subunit 1
PHYH	ENSG00000107537	-0.329632	3.56368	3.08193e-08	2.21739e-07	protein_coding	10	13319796	13344412	-	phytanoyl-CoA 2-hydroxylase
RASSF4	ENSG00000107551	-0.288445	4.97228	3.00768e-09	2.50995e-08	protein_coding	10	45454855	45491339	+	Ras association domain family member 4
DNMBP	ENSG00000107554	0.158321	7.37247	6.88935e-06	3.19298e-05	protein_coding	10	101635334	101769676	-	dynamin binding protein
ERLIN1	ENSG00000107566	0.255809	7.49512	2.8235e-12	3.52501e-11	protein_coding	10	101909851	101948091	-	ER lipid raft associated 1
TRDMT1	ENSG00000107614	-0.285651	3.55763	1.15528e-05	5.12751e-05	protein_coding	10	17184253	17244053	-	tRNA aspartic acid methyltransferase 1
DDX50	ENSG00000107625	0.206802	4.43443	0.00019204	0.000666114	protein_coding	10	70661034	70706603	+	DExD-box helicase 50
MAPK8	ENSG00000107643	-0.209575	4.02499	5.83751e-05	0.000224623	protein_coding	10	49514698	49647403	+	mitogen-activated protein kinase 8
ATE1	ENSG00000107669	-0.123892	5.22722	0.00274596	0.0072089	protein_coding	10	123499939	123688316	-	arginyltransferase 1
NSMCE4A	ENSG00000107672	0.287442	5.22684	3.49915e-12	4.31145e-11	protein_coding	10	123716603	123734732	-	NSE4 homolog A, SMC5-SMC6 complex component
SPOCK2	ENSG00000107742	-0.392614	1.74244	0.00121355	0.0034847	protein_coding	10	73818793	73848790	-	SPARC (osteonectin), cwcv and kazal like domains proteoglycan 2
MICU1	ENSG00000107745	-0.145859	5.91564	9.94485e-05	0.000364147	protein_coding	10	74127098	74385899	-	mitochondrial calcium uptake 1
BMPR1A	ENSG00000107779	0.161876	6.49813	7.88853e-06	3.61345e-05	protein_coding	10	88516407	88692595	+	bone morphogenetic protein receptor type 1A
MINPP1	ENSG00000107789	0.173462	6.32127	3.1287e-05	0.000127134	protein_coding	10	89264632	89313217	+	multiple inositol-polyphosphate phosphatase 1
ACTA2	ENSG00000107796	-0.293514	4.31038	1.26743e-08	9.65941e-08	protein_coding	10	90694831	90751147	-	actin alpha 2, smooth muscle
LIPA	ENSG00000107798	0.655171	6.33381	5.81648e-67	5.11019e-65	protein_coding	10	90973326	91174314	-	lipase A, lysosomal acid type
LZTS2	ENSG00000107816	0.11362	6.38404	0.00653158	0.0154162	protein_coding	10	102756375	102767593	+	leucine zipper tumor suppressor 2
SFXN3	ENSG00000107819	-0.0819814	6.48167	0.0167595	0.0350114	protein_coding	10	102790991	102800998	+	sideroflexin 3
KAZALD1	ENSG00000107821	0.209928	3.28457	0.00574912	0.0137879	protein_coding	10	102821598	102827888	+	Kazal type serine peptidase inhibitor domain 1
NPM3	ENSG00000107833	-0.274871	4.13589	1.38558e-07	8.90863e-07	protein_coding	10	103541082	103543170	-	nucleophosmin/nucleoplasmin 3
TNKS2	ENSG00000107854	0.135721	6.78932	0.000149881	0.000532547	protein_coding	10	93558069	93625033	+	tankyrase 2
ARHGAP21	ENSG00000107863	0.13671	7.32068	2.72469e-05	0.000112298	protein_coding	10	24872538	25012597	-	Rho GTPase activating protein 21
CPEB3	ENSG00000107864	0.502744	2.09532	3.28187e-06	1.63516e-05	protein_coding	10	93806449	94050844	-	cytoplasmic polyadenylation element binding protein 3
CUEDC2	ENSG00000107874	-0.209155	5.71258	7.82387e-08	5.21492e-07	protein_coding	10	104183002	104192418	-	CUE domain containing 2
ANKRD26	ENSG00000107890	0.221114	4.07361	0.00179137	0.00492688	protein_coding	10	27280843	27389421	-	ankyrin repeat domain 26
ACBD5	ENSG00000107897	0.146746	4.88396	0.00267541	0.00704593	protein_coding	10	27484146	27531059	-	acyl-CoA binding domain containing 5
LHPP	ENSG00000107902	-0.548926	1.56881	3.30697e-06	1.64419e-05	protein_coding	10	126150403	126306457	+	phospholysine phosphohistidine inorganic pyrophosphate phosphatase
LARP4B	ENSG00000107929	0.124809	5.59756	0.0013623	0.00386245	protein_coding	10	855484	977564	-	La ribonucleoprotein 4B
EDRF1	ENSG00000107938	0.138246	4.62493	0.00468371	0.011542	protein_coding	10	127408084	127452712	+	erythroid differentiation regulatory factor 1
SH3PXD2A	ENSG00000107957	-0.124919	7.25169	0.0021045	0.00569617	protein_coding	10	105348285	105615301	-	SH3 and PX domains 2A
OBFC1	ENSG00000107960	-0.142534	5.09674	0.00179674	0.00493938	protein_coding	10	105642300	105677963	-	STN1 subunit of CST complex
DKK1	ENSG00000107984	0.130217	9.08991	0.000571418	0.00177525	protein_coding	10	54074056	54077802	+	dickkopf WNT signaling pathway inhibitor 1
FAM208B	ENSG00000108021	0.14048	6.31237	0.000211239	0.000726825	protein_coding	10	5726801	5805703	+	transcription activation suppressor family member 2
XPNPEP1	ENSG00000108039	-0.123262	5.91495	0.000979744	0.00288118	protein_coding	10	111624524	111683311	-	X-prolyl aminopeptidase 1
SMC3	ENSG00000108055	0.178713	7.13653	2.03586e-06	1.05989e-05	protein_coding	10	112327449	112364394	+	structural maintenance of chromosomes 3
TFAM	ENSG00000108064	0.191322	5.29247	1.85769e-05	7.94827e-05	protein_coding	10	60144782	60158981	+	transcription factor A, mitochondrial
CCNY	ENSG00000108100	-0.153865	5.95481	0.000215861	0.000741104	protein_coding	10	35535953	35860852	+	cyclin Y
UBE2S	ENSG00000108106	-0.184915	8.27238	8.45469e-05	0.000314301	protein_coding	19	55912652	55919145	-	ubiquitin conjugating enzyme E2 S
RPL28	ENSG00000108107	-0.111187	8.92961	0.00192373	0.00525514	protein_coding	19	55896713	55914612	+	ribosomal protein L28
PPIF	ENSG00000108179	0.112841	7.10607	0.003987	0.0100011	protein_coding	10	81107225	81115093	+	peptidylprolyl isomerase F
PBLD	ENSG00000108187	-0.301802	2.32786	0.00526724	0.0127928	protein_coding	10	70042417	70092806	-	phenazine biosynthesis like protein domain containing
NUFIP2	ENSG00000108256	0.317305	7.24347	4.25504e-18	9.44859e-17	protein_coding	17	27582854	27621136	-	nuclear FMR1 interacting protein 2
GIT1	ENSG00000108262	0.207818	7.3188	2.82595e-10	2.71556e-09	protein_coding	17	27900487	27921072	-	GIT ArfGAP 1
AATF	ENSG00000108270	0.144658	6.182	0.00222457	0.00597542	protein_coding	17	35306175	35414171	+	NA
DHRS11	ENSG00000108272	-0.211888	3.74948	0.000503168	0.00158546	protein_coding	17	34948228	34957235	+	NA
MLLT6	ENSG00000108292	0.170176	6.42821	4.4079e-05	0.00017387	protein_coding	17	36861795	36886056	+	NA
RPL19	ENSG00000108298	-0.179504	8.99341	9.19104e-06	4.16023e-05	protein_coding	17	37356536	37360980	+	ribosomal protein L19
FBXL20	ENSG00000108306	-0.222353	2.66276	0.00633571	0.0150014	protein_coding	17	37415384	37558776	-	F-box and leucine rich repeat protein 20
RAPGEFL1	ENSG00000108352	-0.410131	2.60395	3.16116e-06	1.58002e-05	protein_coding	17	38333263	38351908	+	Rap guanine nucleotide exchange factor like 1
RAD51C	ENSG00000108384	0.167157	5.16727	0.00102494	0.00300222	protein_coding	17	56769934	56811703	+	RAD51 paralog C
SEPT4	ENSG00000108387	-0.512987	1.77083	1.36281e-05	5.95886e-05	protein_coding	17	56597611	56618179	-	septin 4
MTMR4	ENSG00000108389	0.0923756	5.78775	0.0192182	0.0393916	protein_coding	17	56566898	56595266	-	myotubularin related protein 4
DHX40	ENSG00000108406	-0.255542	6.42227	1.56609e-08	1.17457e-07	protein_coding	17	57642886	57685706	+	DEAH-box helicase 40
KPNB1	ENSG00000108424	0.204829	9.16154	2.6464e-08	1.91966e-07	protein_coding	17	45726842	45762871	+	karyopherin subunit beta 1
CDK5RAP3	ENSG00000108465	-0.259802	5.9795	9.0835e-11	9.34444e-10	protein_coding	17	46045176	46059140	+	CDK5 regulatory subunit associated protein 3
CBX1	ENSG00000108468	0.0870458	7.0358	0.0171837	0.0357792	protein_coding	17	46147414	46178883	-	chromobox 1
GALK1	ENSG00000108479	-0.164849	3.93967	0.00734562	0.017143	protein_coding	17	73747675	73761792	-	galactokinase 1
INTS2	ENSG00000108506	0.139614	4.77819	0.00538116	0.0130225	protein_coding	17	59942731	60005377	-	integrator complex subunit 2
MED13	ENSG00000108510	0.2169	6.76218	9.85481e-10	8.82813e-09	protein_coding	17	60019966	60142643	-	mediator complex subunit 13
HOXB6	ENSG00000108511	-0.370968	7.43657	1.47598e-20	3.99192e-19	protein_coding	17	46671639	46682354	-	homeobox B6
RNF167	ENSG00000108523	-0.17455	7.03964	1.81983e-06	9.56931e-06	protein_coding	17	4843303	4848517	+	ring finger protein 167
RAI1	ENSG00000108557	0.194106	6.53575	5.56563e-08	3.84388e-07	protein_coding	17	17584787	17714767	+	retinoic acid induced 1
C1QBP	ENSG00000108561	0.0887796	7.43651	0.0142426	0.0304182	protein_coding	17	5336097	5352150	-	complement C1q binding protein
BLMH	ENSG00000108578	0.135192	5.51646	0.00142108	0.00401062	protein_coding	17	28575218	28619074	-	bleomycin hydrolase
CPD	ENSG00000108582	-0.124307	7.77109	0.000791488	0.00238356	protein_coding	17	28705923	28797007	+	carboxypeptidase D
GOSR1	ENSG00000108587	0.154074	6.1455	1.71698e-05	7.38872e-05	protein_coding	17	28804380	28854610	+	golgi SNAP receptor complex member 1
CCDC47	ENSG00000108588	0.225055	7.15242	2.09227e-10	2.05522e-09	protein_coding	17	61822610	61853711	-	coiled-coil domain containing 47
MED31	ENSG00000108590	0.251267	2.16321	0.00784786	0.0181297	protein_coding	17	6546635	6554954	-	mediator complex subunit 31
DRG2	ENSG00000108591	-0.142276	5.19912	0.00408945	0.0102272	protein_coding	17	17991200	18011285	+	developmentally regulated GTP binding protein 2
AKAP10	ENSG00000108599	0.236541	5.57243	2.26508e-08	1.6618e-07	protein_coding	17	19807615	19881656	-	A-kinase anchoring protein 10
SYNGR2	ENSG00000108639	-0.11935	6.72738	0.00471285	0.0116077	protein_coding	17	76164639	76169608	+	synaptogyrin 2
B9D1	ENSG00000108641	-0.532117	3.85612	1.24536e-12	1.61759e-11	protein_coding	17	19240867	19281495	-	B9 domain containing 1
UTP6	ENSG00000108651	0.168092	5.31829	3.32831e-05	0.000134521	protein_coding	17	30187923	30228784	-	UTP6 small subunit processome component
DDX5	ENSG00000108654	-0.0848405	9.41531	0.0206675	0.0420273	protein_coding	17	62495734	62504317	-	DEAD-box helicase 5
C17orf75	ENSG00000108666	-0.125152	3.94005	0.0211346	0.0428294	protein_coding	17	30651584	30677042	-	chromosome 17 open reading frame 75
CYTH1	ENSG00000108669	0.695833	5.44531	3.06588e-73	2.87198e-71	protein_coding	17	76670130	76778379	-	cytohesin 1
PSMD11	ENSG00000108671	0.247647	7.68472	7.33186e-14	1.08143e-12	protein_coding	17	30771279	30810336	+	proteasome 26S subunit, non-ATPase 11
LGALS3BP	ENSG00000108679	0.970971	10.471	2.72004e-142	3.77206e-140	protein_coding	17	76967320	76976191	-	galectin 3 binding protein
CCL2	ENSG00000108691	-0.457608	5.42818	7.04462e-23	2.25955e-21	protein_coding	17	32582304	32584222	+	C-C motif chemokine ligand 2
DHX58	ENSG00000108771	2.44494	5.56541	0	0	protein_coding	17	40253422	40264751	-	DExH-box helicase 58
KAT2A	ENSG00000108773	0.377191	6.66111	2.12477e-17	4.4658e-16	protein_coding	17	40265126	40273376	-	lysine acetyltransferase 2A
HSD17B1	ENSG00000108786	-0.249537	1.96681	0.0152093	0.0322639	protein_coding	17	40701232	40707231	+	hydroxysteroid 17-beta dehydrogenase 1
CNTNAP1	ENSG00000108797	0.121503	5.16537	0.00846166	0.0193329	protein_coding	17	40834631	40851832	+	contactin associated protein 1
PPP1R9B	ENSG00000108819	0.216674	6.40621	1.812e-08	1.34686e-07	protein_coding	17	48211104	48227991	-	protein phosphatase 1 regulatory subunit 9B
COL1A1	ENSG00000108821	0.262896	5.80387	9.61587e-08	6.32341e-07	protein_coding	17	48260650	48278993	-	collagen type I alpha 1 chain
VAT1	ENSG00000108828	-0.467911	6.52688	4.49491e-25	1.60963e-23	protein_coding	17	41166622	41177140	-	vesicle amine transport 1
RND2	ENSG00000108830	-0.630206	1.81244	6.72149e-09	5.34132e-08	protein_coding	17	41177258	41184057	+	Rho family GTPase 2
ALOX12	ENSG00000108839	-0.419954	1.36386	0.00265614	0.0069991	protein_coding	17	6899384	6914055	+	arachidonate 12-lipoxygenase, 12S type
HDAC5	ENSG00000108840	-0.260269	4.70366	2.28323e-06	1.17741e-05	protein_coding	17	42154114	42201070	-	histone deacetylase 5
MPP2	ENSG00000108852	0.293791	1.84007	0.0080671	0.0185539	protein_coding	17	41952725	41987068	-	membrane palmitoylated protein 2
DUSP3	ENSG00000108861	-0.160286	6.54899	3.90936e-05	0.000155988	protein_coding	17	41843489	41856356	-	dual specificity phosphatase 3
EFTUD2	ENSG00000108883	0.118207	7.34369	0.00238987	0.00637584	protein_coding	17	42927311	42977030	-	elongation factor Tu GTP binding domain containing 2
HLF	ENSG00000108924	-0.737927	1.28716	2.94445e-06	1.48429e-05	protein_coding	17	53342373	53402426	+	HLF transcription factor, PAR bZIP family member
PRKAR1A	ENSG00000108946	-0.106977	7.90324	0.00357985	0.00908795	protein_coding	17	66507921	66547460	+	protein kinase cAMP-dependent type I regulatory subunit alpha
EFNB3	ENSG00000108947	-0.59092	2.76427	9.43263e-12	1.10818e-10	protein_coding	17	7608520	7614696	+	ephrin B3
DPH1	ENSG00000108963	-0.22661	4.3318	4.69236e-05	0.000184013	protein_coding	17	1933404	1946724	+	diphthamide biosynthesis 1
DHRS7B	ENSG00000109016	0.199866	4.05467	0.0092551	0.0209288	protein_coding	17	21026677	21096578	+	dehydrogenase/reductase 7B
SLC9A3R1	ENSG00000109062	0.16473	4.83627	0.00119997	0.00345063	protein_coding	17	72744791	72765492	+	SLC9A3 regulator 1
NAT9	ENSG00000109065	-0.200888	4.52947	0.000200786	0.000693897	protein_coding	17	72766686	72772506	-	N-acetyltransferase 9 (putative)
TMEM104	ENSG00000109066	0.192618	5.95421	6.86714e-07	3.90731e-06	protein_coding	17	72772622	72835918	+	transmembrane protein 104
TNFAIP1	ENSG00000109079	-0.0893556	5.98086	0.0162628	0.0341758	protein_coding	17	26662628	26674035	+	TNF alpha induced protein 1
IFT20	ENSG00000109083	-0.327465	3.63722	1.11332e-06	6.10387e-06	protein_coding	17	26655352	26662515	-	intraflagellar transport 20
TMEM97	ENSG00000109084	0.34279	6.03049	1.4497e-15	2.53787e-14	protein_coding	17	26646121	26655707	+	transmembrane protein 97
CDR2L	ENSG00000109089	0.0993415	5.15749	0.0213771	0.0432773	protein_coding	17	72983727	73001895	+	cerebellar degeneration related protein 2 like
UNC119	ENSG00000109103	-0.168416	5.34659	0.000491885	0.00155375	protein_coding	17	26873725	26879686	-	unc-119 lipid binding chaperone
SUPT6H	ENSG00000109111	0.149103	7.79722	3.02145e-06	1.51662e-05	protein_coding	17	26989109	27029697	+	SPT6 homolog, histone chaperone and transcription elongation factor
RAB34	ENSG00000109113	-0.22759	7.15886	1.24605e-10	1.25896e-09	protein_coding	17	27041299	27045447	-	RAB34, member RAS oncogene family
TMEM33	ENSG00000109133	0.169301	6.50437	4.23561e-06	2.06809e-05	protein_coding	4	41937137	41962589	+	transmembrane protein 33
OCIAD1	ENSG00000109180	0.0912123	7.42254	0.0152986	0.032429	protein_coding	4	48807229	48863834	+	OCIA domain containing 1
USP46	ENSG00000109189	-0.275987	5.3326	6.8315e-12	8.15456e-11	protein_coding	4	53457138	53525502	-	ubiquitin specific peptidase 46
NMU	ENSG00000109255	-0.160713	4.58184	0.00216459	0.00583648	protein_coding	4	56461396	56502865	-	neuromedin U
NFKB1	ENSG00000109320	0.206325	4.91807	9.38855e-07	5.21606e-06	protein_coding	4	103422486	103538459	+	nuclear factor kappa B subunit 1
NDUFC1	ENSG00000109390	-0.171895	6.18446	4.93246e-05	0.000192468	protein_coding	4	140188034	140223705	-	NADH:ubiquinone oxidoreductase subunit C1
TBC1D9	ENSG00000109436	-0.0970551	6.09375	0.0150047	0.0318537	protein_coding	4	141541919	141677274	-	TBC1 domain family member 9
ZNF330	ENSG00000109445	-0.137284	4.45323	0.0127429	0.0276631	protein_coding	4	142142041	142155851	+	zinc finger protein 330
CPE	ENSG00000109472	-0.272603	5.25788	5.20888e-08	3.60645e-07	protein_coding	4	166282346	166419472	+	carboxypeptidase E
RPL34	ENSG00000109475	-0.26579	6.52852	3.48437e-12	4.29699e-11	protein_coding	4	109541722	109551568	+	ribosomal protein L34
CLCN3	ENSG00000109572	-0.112011	6.86603	0.00432551	0.0107416	protein_coding	4	170533784	170644824	+	chloride voltage-gated channel 3
GALNT7	ENSG00000109586	-0.0892744	6.54041	0.0185793	0.0383041	protein_coding	4	174089904	174245118	+	polypeptide N-acetylgalactosaminyltransferase 7
DHX15	ENSG00000109606	0.118481	8.12448	0.00067271	0.00205429	protein_coding	4	24519064	24586173	-	DEAH-box helicase 15
SOD3	ENSG00000109610	0.172462	9.41226	2.95409e-06	1.48862e-05	protein_coding	4	24791534	24802464	+	superoxide dismutase 3
SEPSECS	ENSG00000109618	0.148825	4.0665	0.00740641	0.0172498	protein_coding	4	25121627	25162204	-	Sep (O-phosphoserine) tRNA:Sec (selenocysteine) tRNA synthase
TRIM2	ENSG00000109654	-0.409125	6.36195	6.52067e-21	1.80499e-19	protein_coding	4	154073494	154260472	+	tripartite motif containing 2
NEIL3	ENSG00000109674	0.396616	4.50984	5.64324e-17	1.14525e-15	protein_coding	4	178230990	178284097	+	nei like DNA glycosylase 3
TBC1D19	ENSG00000109680	-0.326672	3.03794	5.19784e-06	2.49063e-05	protein_coding	4	26578059	26756973	+	TBC1 domain family member 19
WHSC1	ENSG00000109685	0.151503	8.53813	0.00017522	0.000612273	protein_coding	4	1873151	1983934	+	nuclear receptor binding SET domain protein 2
STIM2	ENSG00000109689	0.285742	4.72813	1.02959e-09	9.1942e-09	protein_coding	4	26859300	27027003	+	stromal interaction molecule 2
NKX3-2	ENSG00000109705	-0.377018	0.514496	0.02033	0.0414065	protein_coding	4	13542454	13546674	-	NK3 homeobox 2
MFSD10	ENSG00000109736	-0.240372	7.09506	1.01419e-08	7.86496e-08	protein_coding	4	2932288	2936586	-	major facilitator superfamily domain containing 10
GLRB	ENSG00000109738	0.144106	3.78118	0.0187031	0.0385145	protein_coding	4	157997209	158093242	+	glycine receptor beta
HGFAC	ENSG00000109758	-0.850195	0.261433	1.20654e-06	6.58428e-06	protein_coding	4	3443614	3451211	+	HGF activator
SNX25	ENSG00000109762	0.231097	5.49663	1.95187e-07	1.22057e-06	protein_coding	4	186125391	186291339	+	sorting nexin 25
UFSP2	ENSG00000109775	-0.205526	3.9539	0.000296366	0.000981526	protein_coding	4	186320694	186347139	-	UFM1 specific peptidase 2
KLF3	ENSG00000109787	-0.113914	5.34007	0.0137998	0.0296476	protein_coding	4	38665817	38702663	+	Kruppel like factor 3
KLHL5	ENSG00000109790	-0.406375	6.64217	5.55437e-30	2.43996e-28	protein_coding	4	39046659	39128477	+	kelch like family member 5
NCAPG	ENSG00000109805	0.276384	6.99597	1.02444e-11	1.19659e-10	protein_coding	4	17812525	17846485	+	non-SMC condensin I complex subunit G
UGDH	ENSG00000109814	0.106342	5.068	0.0118953	0.0260625	protein_coding	4	39500375	39529931	-	UDP-glucose 6-dehydrogenase
CRYAB	ENSG00000109846	-0.0826429	7.45811	0.0146125	0.0311099	protein_coding	11	111779289	111794446	-	crystallin alpha B
HTATIP2	ENSG00000109854	0.151659	3.74977	0.0113095	0.0249266	protein_coding	11	20385231	20405329	+	HIV-1 Tat interactive protein 2
MTCH2	ENSG00000109919	-0.12634	7.05164	0.000529446	0.00165895	protein_coding	11	47638867	47664175	-	mitochondrial carrier 2
HSPA8	ENSG00000109971	0.288146	10.4896	2.06199e-15	3.5526e-14	protein_coding	11	122928197	122933938	-	heat shock protein family A (Hsp70) member 8
VWA5A	ENSG00000110002	-0.172626	4.92369	0.00307419	0.0079569	protein_coding	11	123986069	124018428	+	von Willebrand factor A domain containing 5A
DNAJC4	ENSG00000110011	-0.314459	4.82377	7.26608e-11	7.60197e-10	protein_coding	11	63997750	64001758	+	DnaJ heat shock protein family (Hsp40) member C4
SIAE	ENSG00000110013	-0.218084	5.3434	7.62423e-07	4.2966e-06	protein_coding	11	124503009	124565603	-	sialic acid acetylesterase
OSBP	ENSG00000110048	0.120361	6.47028	0.000926051	0.00274382	protein_coding	11	59341871	59383617	-	oxysterol binding protein
UNC93B1	ENSG00000110057	1.00984	6.49627	3.94975e-171	6.49643e-169	protein_coding	11	67758575	67772452	-	unc-93 homolog B1, TLR signaling regulator
SUV420H1	ENSG00000110066	-0.293909	5.25216	1.45671e-09	1.27284e-08	protein_coding	11	67922330	67981295	-	lysine methyltransferase 5B
CPT1A	ENSG00000110090	0.240729	7.86547	6.73252e-14	9.99281e-13	protein_coding	11	68522088	68611878	-	carnitine palmitoyltransferase 1A
PRPF19	ENSG00000110107	0.14799	6.8341	0.000149325	0.000530971	protein_coding	11	60658202	60674060	-	pre-mRNA processing factor 19
TMEM109	ENSG00000110108	0.379318	6.93438	1.30788e-21	3.83022e-20	protein_coding	11	60681346	60690915	+	transmembrane protein 109
CHORDC1	ENSG00000110172	0.398469	4.27204	1.43366e-11	1.6407e-10	protein_coding	11	89934328	89956532	-	cysteine and histidine rich domain containing 1
ANAPC15	ENSG00000110200	-0.425307	2.51076	1.64201e-06	8.6957e-06	protein_coding	11	71817424	71823826	-	anaphase promoting complex subunit 15
ARHGEF17	ENSG00000110237	-0.190878	4.8105	0.000500785	0.00157869	protein_coding	11	73019334	73080136	+	Rho guanine nucleotide exchange factor 17
CEP164	ENSG00000110274	0.106353	5.21716	0.0174985	0.0363194	protein_coding	11	117185273	117283984	+	centrosomal protein 164
RNF141	ENSG00000110315	-0.291459	4.54908	1.45418e-09	1.27207e-08	protein_coding	11	10533225	10562777	-	ring finger protein 141
EIF4G2	ENSG00000110321	-0.223913	9.95507	8.26693e-13	1.09388e-11	protein_coding	11	10818597	10830657	-	eukaryotic translation initiation factor 4 gamma 2
BIRC2	ENSG00000110330	0.289528	5.83998	1.97538e-12	2.51049e-11	protein_coding	11	102217942	102249401	+	baculoviral IAP repeat containing 2
CBL	ENSG00000110395	0.243664	6.05834	1.56183e-11	1.77876e-10	protein_coding	11	119076752	119178859	+	Cbl proto-oncogene
PVRL1	ENSG00000110400	0.247858	4.82806	5.62772e-06	2.68027e-05	protein_coding	11	119494120	119599794	-	nectin cell adhesion molecule 1
HIPK3	ENSG00000110422	-0.210496	5.79886	2.96246e-06	1.49089e-05	protein_coding	11	33278218	33378569	+	homeodomain interacting protein kinase 3
COMMD9	ENSG00000110442	-0.206928	5.34321	2.81281e-06	1.42504e-05	protein_coding	11	36295051	36310999	-	COMM domain containing 9
SLC15A3	ENSG00000110446	2.91479	5.92009	0	0	protein_coding	11	60704556	60720002	-	solute carrier family 15 member 3
ACCS	ENSG00000110455	-0.387059	2.77847	4.08682e-05	0.000162428	protein_coding	11	44087475	44105772	+	1-aminocyclopropane-1-carboxylate synthase homolog (inactive)
MDK	ENSG00000110492	0.394707	8.17062	1.03191e-22	3.26541e-21	protein_coding	11	46402306	46405375	+	midkine
AMBRA1	ENSG00000110497	0.239399	5.8066	1.96424e-10	1.93888e-09	protein_coding	11	46417964	46615675	-	autophagy and beclin 1 regulator 1
MADD	ENSG00000110514	0.324538	6.39912	4.85349e-20	1.27845e-18	protein_coding	11	47290712	47351582	+	MAP kinase activating death domain
NAA40	ENSG00000110583	0.155889	6.06131	2.68919e-05	0.000110997	protein_coding	11	63706431	63724800	+	N(alpha)-acetyltransferase 40, NatD catalytic subunit
CARS	ENSG00000110619	0.0892619	5.4301	0.0185496	0.0382531	protein_coding	11	3022152	3078843	-	cysteinyl-tRNA synthetase 1
SLC22A18	ENSG00000110628	-0.0997081	5.14584	0.0243601	0.0485383	protein_coding	11	2920951	2946476	+	solute carrier family 22 member 18
ELMOD1	ENSG00000110675	-0.369161	3.78159	9.34259e-08	6.14942e-07	protein_coding	11	107461817	107537505	+	ELMO domain containing 1
SOX6	ENSG00000110693	-0.582195	2.01964	1.51976e-08	1.14285e-07	protein_coding	11	15987995	16761138	-	SRY-box transcription factor 6
PITPNM1	ENSG00000110697	-0.139795	7.30412	0.000562797	0.00175193	protein_coding	11	67259239	67273734	-	phosphatidylinositol transfer protein membrane associated 1
RPS13	ENSG00000110700	-0.226424	7.53215	4.5457e-08	3.18312e-07	protein_coding	11	17095936	17099334	-	ribosomal protein S13
NUP98	ENSG00000110713	0.168522	6.61547	4.35459e-07	2.55902e-06	protein_coding	11	3692313	3819022	-	nucleoporin 98
NDUFS8	ENSG00000110717	-0.141968	7.23207	8.19427e-05	0.000305423	protein_coding	11	67798084	67804111	+	NADH:ubiquinone oxidoreductase core subunit S8
TCIRG1	ENSG00000110719	0.12055	7.85366	0.00743567	0.0172933	protein_coding	11	67806483	67818362	+	T cell immune regulator 1, ATPase H+ transporting V0 subunit a3
HPS5	ENSG00000110756	0.237461	5.26611	1.01344e-06	5.59311e-06	protein_coding	11	18300223	18343745	-	HPS5 biogenesis of lysosomal organelles complex 2 subunit 2
LEPREL2	ENSG00000110811	0.143936	5.36472	0.00416842	0.0103935	polymorphic_pseudogene	12	6937572	6949018	+	prolyl 3-hydroxylase 3
PPFIBP1	ENSG00000110841	0.093848	7.37573	0.0236642	0.0472983	protein_coding	12	27676364	27848497	+	PPFIA binding protein 1
PRDM4	ENSG00000110851	0.115693	5.60099	0.00170006	0.00470317	protein_coding	12	108126643	108155049	-	PR/SET domain 4
CLEC2B	ENSG00000110852	0.373655	5.24643	9.3079e-15	1.50469e-13	protein_coding	12	10005583	10022735	-	C-type lectin domain family 2 member B
ASIC1	ENSG00000110881	-0.422831	3.25747	1.03172e-05	4.6197e-05	protein_coding	12	50451331	50477394	+	acid sensing ion channel subunit 1
KCTD10	ENSG00000110906	-0.235067	6.31778	1.82894e-10	1.81547e-09	protein_coding	12	109886461	109915349	-	potassium channel tetramerization domain containing 10
CSRNP2	ENSG00000110925	0.262954	5.73908	2.0302e-11	2.29004e-10	protein_coding	12	51454990	51477447	-	cysteine and serine rich nuclear protein 2
IL23A	ENSG00000110944	0.841741	0.362284	1.19746e-06	6.5398e-06	protein_coding	12	56732663	56734193	+	interleukin 23 subunit alpha
ATP5B	ENSG00000110955	-0.142627	9.78302	3.66632e-06	1.81266e-05	protein_coding	12	57031959	57039798	-	ATP synthase F1 subunit beta
PTGES3	ENSG00000110958	0.170063	8.55331	1.48659e-06	7.95003e-06	protein_coding	12	57057127	57082159	-	prostaglandin E synthase 3
BCL7A	ENSG00000110987	0.321114	3.67324	6.34043e-08	4.32011e-07	protein_coding	12	122457328	122499948	+	BAF chromatin remodeling complex subunit BCL7A
RSRC2	ENSG00000111011	0.0895068	6.87127	0.0122429	0.0267164	protein_coding	12	122989190	123011547	-	arginine and serine rich coiled-coil 2
CYP27B1	ENSG00000111012	-0.404612	1.83301	0.00337968	0.00864321	protein_coding	12	58156117	58162769	-	cytochrome P450 family 27 subfamily B member 1
KRT18	ENSG00000111057	-0.109856	7.0994	0.00127161	0.00363151	protein_coding	12	53342655	53346685	+	keratin 18
ACSS3	ENSG00000111058	-0.282135	4.89075	1.55865e-07	9.91327e-07	protein_coding	12	81331594	81650533	+	acyl-CoA synthetase short chain family member 3
TENC1	ENSG00000111077	-0.25981	3.92225	9.49894e-05	0.000349447	protein_coding	12	53440753	53458156	+	tensin 2
LTA4H	ENSG00000111144	-0.159023	6.21734	3.0368e-05	0.000123898	protein_coding	12	96394606	96437298	-	leukotriene A4 hydrolase
ELK3	ENSG00000111145	-0.221599	7.14071	1.79469e-09	1.54886e-08	protein_coding	12	96588160	96663613	+	ETS transcription factor ELK3
MAGOHB	ENSG00000111196	0.315106	4.4951	1.90519e-09	1.63724e-08	protein_coding	12	10758612	10766222	-	mago homolog B, exon junction complex subunit
ITFG2	ENSG00000111203	-0.260142	4.34168	1.26383e-07	8.15924e-07	protein_coding	12	2921788	2968957	+	integrin alpha FG-GAP repeat containing 2
FOXM1	ENSG00000111206	0.117912	8.26717	0.0217211	0.0439047	protein_coding	12	2966847	2986206	-	forkhead box M1
ARPC3	ENSG00000111229	-0.101966	6.80614	0.00397694	0.00998781	protein_coding	12	110872630	110888227	-	actin related protein 2/3 complex subunit 3
RAD51AP1	ENSG00000111247	0.507105	5.27758	1.52638e-24	5.29182e-23	protein_coding	12	4647950	4669214	+	RAD51 associated protein 1
SH2B3	ENSG00000111252	0.244733	8.16298	7.22798e-14	1.06722e-12	protein_coding	12	111843752	111889427	+	SH2B adaptor protein 3
CREBL2	ENSG00000111269	-0.324898	6.06132	7.14089e-18	1.55397e-16	protein_coding	12	12764761	12798042	+	cAMP responsive element binding protein like 2
ACAD10	ENSG00000111271	-0.313215	4.66614	2.14668e-07	1.33004e-06	protein_coding	12	112123857	112194903	+	acyl-CoA dehydrogenase family member 10
ALDH2	ENSG00000111275	-0.255182	4.50089	4.79255e-06	2.31446e-05	protein_coding	12	112204691	112247782	+	aldehyde dehydrogenase 2 family member
NAA25	ENSG00000111300	0.169181	5.98635	1.35311e-05	5.9256e-05	protein_coding	12	112464500	112546826	-	N(alpha)-acetyltransferase 25, NatB auxiliary subunit
SCNN1A	ENSG00000111319	-0.570737	2.88825	8.3813e-12	9.87946e-11	protein_coding	12	6456009	6486896	-	sodium channel epithelial 1 alpha subunit
OAS3	ENSG00000111331	3.56364	9.25939	0	0	protein_coding	12	113376157	113411054	+	2'-5'-oligoadenylate synthetase 3
OAS2	ENSG00000111335	3.94289	8.50641	0	0	protein_coding	12	113416200	113449528	+	2'-5'-oligoadenylate synthetase 2
ARHGDIB	ENSG00000111348	-0.670871	1.00544	9.27984e-06	4.19774e-05	protein_coding	12	15094951	15114662	-	Rho GDP dissociation inhibitor beta
EIF2B1	ENSG00000111361	-0.0828801	5.87157	0.0246115	0.0489979	protein_coding	12	124104953	124118313	-	eukaryotic translation initiation factor 2B subunit alpha
DDX55	ENSG00000111364	0.227556	4.71412	0.000373338	0.00121149	protein_coding	12	124086624	124105488	+	DEAD-box helicase 55
C12orf49	ENSG00000111412	-0.405621	5.73587	3.35969e-23	1.09752e-21	protein_coding	12	117153593	117175875	-	chromosome 12 open reading frame 49
VDR	ENSG00000111424	0.453746	4.22922	7.7859e-11	8.09791e-10	protein_coding	12	48235320	48336831	-	vitamin D receptor
RFC5	ENSG00000111445	0.138426	5.80835	0.001327	0.00377447	protein_coding	12	118451393	118470935	+	replication factor C subunit 5
COPZ1	ENSG00000111481	-0.213517	7.37594	1.05526e-09	9.39376e-09	protein_coding	12	54694986	54745633	+	coatomer protein complex subunit zeta 1
CAND1	ENSG00000111530	0.157098	7.46137	1.41552e-06	7.62182e-06	protein_coding	12	67663061	67713731	+	cullin associated and neddylation dissociated 1
MDM1	ENSG00000111554	0.233876	4.61129	4.55923e-07	2.66543e-06	protein_coding	12	68666223	68726161	-	Mdm1 nuclear protein
NUP107	ENSG00000111581	0.240455	5.82937	1.03569e-09	9.24278e-09	protein_coding	12	69080514	69136785	+	nucleoporin 107
TIMELESS	ENSG00000111602	0.31633	6.55278	2.6202e-12	3.28279e-11	protein_coding	12	56810903	56843187	-	timeless circadian regulator
KRR1	ENSG00000111615	0.237003	5.2467	1.02094e-09	9.12843e-09	protein_coding	12	75890684	75905416	-	KRR1 small subunit processome component homolog
MRPL51	ENSG00000111639	-0.220142	6.27027	1.12122e-09	9.93092e-09	protein_coding	12	6601150	6603007	-	mitochondrial ribosomal protein L51
GAPDH	ENSG00000111640	-0.126582	11.521	0.000270735	0.000903836	protein_coding	12	6643093	6647537	+	glyceraldehyde-3-phosphate dehydrogenase
NOP2	ENSG00000111641	0.160814	6.35479	8.67154e-05	0.000321771	protein_coding	12	6666029	6677857	-	NOP2 nucleolar protein
CHD4	ENSG00000111642	0.189445	8.19325	6.19889e-09	4.95666e-08	protein_coding	12	6679249	6716642	-	chromodomain helicase DNA binding protein 4
COPS7A	ENSG00000111652	-0.155415	6.29703	6.95282e-06	3.21713e-05	protein_coding	12	6832907	6841041	+	COP9 signalosome subunit 7A
ING4	ENSG00000111653	-0.370675	4.24355	2.54661e-08	1.85297e-07	protein_coding	12	6759446	6772314	-	inhibitor of growth family member 4
CDCA3	ENSG00000111665	-0.180946	6.38374	0.000615075	0.00189962	protein_coding	12	6953957	6961230	-	cell division cycle associated 3
CHPT1	ENSG00000111666	-0.133674	5.98591	0.000271356	0.000905482	protein_coding	12	102090725	102137918	+	choline phosphotransferase 1
TPI1	ENSG00000111669	-0.0811484	9.56936	0.00997474	0.0223425	protein_coding	12	6976283	6980112	+	triosephosphate isomerase 1
ENO2	ENSG00000111674	0.15515	7.20828	4.59996e-06	2.22754e-05	protein_coding	12	7022909	7032861	+	enolase 2
C12orf57	ENSG00000111678	-0.203736	4.52116	0.000913293	0.00270942	protein_coding	12	7052141	7055166	+	chromosome 12 open reading frame 57
NT5DC3	ENSG00000111696	0.22669	5.44217	5.7934e-08	3.97418e-07	protein_coding	12	104164231	104234975	-	5'-nucleotidase domain containing 3
SUDS3	ENSG00000111707	0.141603	5.48815	0.000651267	0.00199744	protein_coding	12	118814185	118855840	+	SDS3 homolog, SIN3A corepressor complex component
GOLT1B	ENSG00000111711	0.12617	5.77038	0.00941856	0.0212447	protein_coding	12	21654715	21671342	+	golgi transport 1B
LDHB	ENSG00000111716	-0.0861013	8.7504	0.00725574	0.0169556	protein_coding	12	21788276	21910791	-	lactate dehydrogenase B
CMAS	ENSG00000111726	0.122859	5.7565	0.000633704	0.00194991	protein_coding	12	22199108	22218608	+	cytidine monophosphate N-acetylneuraminic acid synthetase
HCFC2	ENSG00000111727	0.142071	4.15143	0.0155267	0.0328484	protein_coding	12	104458235	104498639	+	host cell factor C2
ST8SIA1	ENSG00000111728	-0.563673	1.38423	1.7367e-06	9.15602e-06	protein_coding	12	22216707	22589975	-	ST8 alpha-N-acetyl-neuraminide alpha-2,8-sialyltransferase 1
C2CD5	ENSG00000111731	0.266334	5.22251	8.51434e-09	6.66124e-08	protein_coding	12	22601517	22697480	-	C2 calcium dependent domain containing 5
RAB35	ENSG00000111737	0.109766	6.64947	0.00195344	0.00532706	protein_coding	12	120532899	120555306	-	RAB35, member RAS oncogene family
RIC8B	ENSG00000111785	0.154976	5.13658	0.000323784	0.00106421	protein_coding	12	107168373	107283090	+	RIC8 guanine nucleotide exchange factor B
RP11-22B23.1	ENSG00000111788	0.17034	3.84123	0.0232599	0.0465692	pseudogene	12	9429831	9466684	+
COL12A1	ENSG00000111799	-0.179115	5.57835	0.000289566	0.000961255	protein_coding	6	75794042	75915767	-	collagen type XII alpha 1 chain
BTN3A3	ENSG00000111801	1.12406	4.88004	3.5716e-76	3.36801e-74	protein_coding	6	26440700	26453643	+	butyrophilin subfamily 3 member A3
DSE	ENSG00000111817	-0.272169	4.4238	6.43066e-08	4.36905e-07	protein_coding	6	116575336	116762424	+	dermatan sulfate epimerase
TMEM14C	ENSG00000111843	-0.167309	5.99592	7.55746e-06	3.4753e-05	protein_coding	6	10723148	10731362	+	transmembrane protein 14C
GCNT2	ENSG00000111846	0.180025	4.6283	0.000124925	0.000449635	protein_coding	6	10492456	10629601	+	glucosaminyl (N-acetyl) transferase 2 (I blood group)
NEDD9	ENSG00000111859	-0.693131	7.45071	1.40725e-71	1.30101e-69	protein_coding	6	11183531	11382581	-	neural precursor cell expressed, developmentally down-regulated 9
ASF1A	ENSG00000111875	0.241304	5.28179	4.74182e-09	3.84152e-08	protein_coding	6	119215384	119230332	+	anti-silencing function 1A histone chaperone
FAM184A	ENSG00000111879	0.234845	2.15471	0.0201657	0.0411311	protein_coding	6	119280928	119470552	-	family with sequence similarity 184 member A
HDDC2	ENSG00000111906	-0.274616	5.00211	2.85962e-09	2.39063e-08	protein_coding	6	125541108	125623282	-	HD domain containing 2
TPD52L1	ENSG00000111907	-0.501097	2.08901	1.72885e-06	9.11804e-06	protein_coding	6	125440195	125585553	+	TPD52 like 1
NCOA7	ENSG00000111912	0.543785	4.75009	4.84148e-33	2.41988e-31	protein_coding	6	126102307	126252266	+	nuclear receptor coactivator 7
SASH1	ENSG00000111961	-0.161818	5.99977	2.0586e-05	8.72608e-05	protein_coding	6	148593440	148873186	+	SAM and SH3 domain containing 1
ULBP1	ENSG00000111981	0.453465	0.204419	0.00966148	0.0217303	protein_coding	6	150285143	150294846	+	UL16 binding protein 1
FBXO5	ENSG00000112029	0.194774	5.77052	6.81425e-06	3.16232e-05	protein_coding	6	153291664	153304714	-	F-box protein 5
MAPK14	ENSG00000112062	0.126706	6.0296	0.000721425	0.00219076	protein_coding	6	35995488	36079013	+	mitogen-activated protein kinase 14
KCTD20	ENSG00000112078	0.268094	6.05154	4.25244e-14	6.42636e-13	protein_coding	6	36410544	36458920	+	potassium channel tetramerization domain containing 20
SRSF3	ENSG00000112081	0.143797	7.86488	1.95189e-05	8.33118e-05	protein_coding	6	36562145	36573377	+	serine and arginine rich splicing factor 3
MCM3	ENSG00000112118	0.165552	7.11662	0.000106803	0.000388661	protein_coding	6	52128807	52149679	-	minichromosome maintenance complex component 3
RNF8	ENSG00000112130	0.135335	4.61357	0.00680877	0.016009	protein_coding	6	37321748	37362514	+	ring finger protein 8
MDGA1	ENSG00000112139	0.126868	7.51684	0.00337896	0.00864294	protein_coding	6	37600284	37667082	-	MAM domain containing glycosylphosphatidylinositol anchor 1
ICK	ENSG00000112144	-0.32877	5.75998	4.5839e-17	9.35631e-16	protein_coding	6	52866077	52926600	-	intestinal cell kinase
FBXO9	ENSG00000112146	-0.116459	5.81353	0.00180589	0.00496102	protein_coding	6	52916789	52965671	+	F-box protein 9
CD83	ENSG00000112149	0.430745	2.96244	1.57557e-06	8.37207e-06	protein_coding	6	14117872	14137149	+	CD83 molecule
BACH2	ENSG00000112182	-0.813878	1.57823	5.30284e-10	4.91593e-09	protein_coding	6	90636248	91006627	-	BTB domain and CNC homolog 2
RBM24	ENSG00000112183	-0.274329	2.58086	0.000603497	0.00186753	protein_coding	6	17281577	17294106	+	RNA binding motif protein 24
CAP2	ENSG00000112186	-0.103304	6.02053	0.0074031	0.0172475	protein_coding	6	17393447	17558023	+	cyclase associated actin cytoskeleton regulatory protein 2
ZNF451	ENSG00000112200	0.180264	5.12311	0.000153732	0.000544181	protein_coding	6	56951642	57035105	+	zinc finger protein 451
BAG2	ENSG00000112208	0.226397	5.4372	1.36186e-08	1.03234e-07	protein_coding	6	57037124	57054631	+	BCL2 associated athanogene 2
GPR63	ENSG00000112218	0.238582	1.96459	0.0243489	0.0485229	protein_coding	6	97242002	97285353	-	G protein-coupled receptor 63
E2F3	ENSG00000112242	0.11929	5.48132	0.00384163	0.00968626	protein_coding	6	20402398	20493941	+	E2F transcription factor 3
BVES	ENSG00000112276	-0.127651	8.54538	0.00110713	0.00321635	protein_coding	6	105544697	105585049	-	blood vessel epicardial substance
GPLD1	ENSG00000112293	-0.678119	0.178947	0.000773804	0.00233478	protein_coding	6	24424793	24495433	-	glycosylphosphatidylinositol specific phospholipase D1
ALDH5A1	ENSG00000112294	-0.234152	4.06049	4.4249e-05	0.000174443	protein_coding	6	24495080	24537435	+	aldehyde dehydrogenase 5 family member A1
AIM1	ENSG00000112297	0.0875012	7.45308	0.0211088	0.0427887	protein_coding	6	106959730	107018326	+	crystallin beta-gamma domain containing 1
ACOT13	ENSG00000112304	0.192526	3.71822	0.00610442	0.0145355	protein_coding	6	24667263	24705293	+	acyl-CoA thioesterase 13
SMAP1	ENSG00000112305	-0.204611	3.10544	0.00863255	0.0196757	protein_coding	6	71377479	71571718	+	small ArfGAP 1
RPS12	ENSG00000112306	-0.270685	7.70679	1.19616e-10	1.21114e-09	protein_coding	6	133135580	133138703	+	ribosomal protein S12
C6orf62	ENSG00000112308	0.715535	7.71621	4.87748e-96	5.34821e-94	protein_coding	6	24705089	24721064	-	chromosome 6 open reading frame 62
GMNN	ENSG00000112312	0.434601	5.49614	8.81669e-23	2.82154e-21	protein_coding	6	24775159	24786327	+	geminin DNA replication inhibitor
TRIM38	ENSG00000112343	1.07449	5.1224	2.18003e-90	2.30123e-88	protein_coding	6	25963030	25987384	+	tripartite motif containing 38
FIG4	ENSG00000112367	-0.233692	4.25138	4.17832e-06	2.04436e-05	protein_coding	6	110012499	110146631	+	FIG4 phosphoinositide 5-phosphatase
PHF1	ENSG00000112511	0.0939704	6.03917	0.011325	0.0249559	protein_coding	6	33378176	33384230	+	PHD finger protein 1
CUTA	ENSG00000112514	-0.12067	6.17226	0.000610508	0.00188674	protein_coding	6	33384219	33386094	-	cutA divalent cation tolerance homolog
QKI	ENSG00000112531	0.19845	6.03902	5.26365e-06	2.5162e-05	protein_coding	6	163835032	163999628	+	QKI, KH domain containing RNA binding
CCND3	ENSG00000112576	0.439835	6.29268	2.90398e-22	8.94919e-21	protein_coding	6	41902671	42018095	-	cyclin D3
GLTSCR1L	ENSG00000112624	-0.11076	4.72417	0.0153057	0.032438	protein_coding	6	42749765	42836298	+	BRD4 interacting chromatin remodeling complex associated protein like
MRPL2	ENSG00000112651	0.201059	4.43618	0.00118613	0.00341638	protein_coding	6	43021767	43027544	-	mitochondrial ribosomal protein L2
PTK7	ENSG00000112655	0.113072	5.1231	0.0195025	0.0398992	protein_coding	6	43044006	43129457	+	protein tyrosine kinase 7 (inactive)
SRF	ENSG00000112658	-0.171555	5.83481	7.55065e-06	3.47366e-05	protein_coding	6	43139037	43149243	+	serum response factor
CUL9	ENSG00000112659	-0.156383	5.31892	9.44632e-05	0.000347693	protein_coding	6	43149913	43192325	+	cullin 9
DNPH1	ENSG00000112667	-0.313651	3.10308	0.000123503	0.000444856	protein_coding	6	43193367	43197222	-	2'-deoxynucleoside 5'-phosphate N-hydrolase 1
COX7A2	ENSG00000112695	-0.222391	6.57229	1.91731e-09	1.64566e-08	protein_coding	6	75947391	75960039	-	cytochrome c oxidase subunit 7A2
GMDS	ENSG00000112699	-0.198821	3.1277	0.0101558	0.0226905	protein_coding	6	1624041	2245926	-	GDP-mannose 4,6-dehydratase
VEGFA	ENSG00000112715	0.349915	6.0908	1.62254e-22	5.05524e-21	protein_coding	6	43737921	43754224	+	vascular endothelial growth factor A
SLC29A1	ENSG00000112759	0.226748	6.04642	7.77403e-08	5.18697e-07	protein_coding	6	44187242	44201888	+	solute carrier family 29 member 1 (Augustine blood group)
BTN2A1	ENSG00000112763	0.475897	5.6838	9.16539e-30	3.98906e-28	protein_coding	6	26458150	26476849	+	butyrophilin subfamily 2 member A1
LAMA4	ENSG00000112769	0.135047	8.70568	0.000126514	0.000455121	protein_coding	6	112429963	112576141	-	laminin subunit alpha 4
FAM46A	ENSG00000112773	0.623571	7.21364	6.10128e-62	5.04693e-60	protein_coding	6	82201156	82462491	-	terminal nucleotidyltransferase 5A
CLIC5	ENSG00000112782	-0.833883	0.391597	2.37238e-05	9.92821e-05	protein_coding	6	45868045	46048132	-	chloride intracellular channel 5
CEP72	ENSG00000112877	0.583859	2.73099	1.23302e-10	1.24758e-09	protein_coding	5	612387	667283	+	centrosomal protein 72
MAN2A1	ENSG00000112893	-0.162521	7.80447	3.28215e-05	0.000133102	protein_coding	5	109025067	109205326	+	mannosidase alpha class 2A member 1
SEMA5A	ENSG00000112902	-0.630098	4.704	6.01421e-16	1.10196e-14	protein_coding	5	9035138	9546187	-	semaphorin 5A
PAPD7	ENSG00000112941	0.127209	5.61038	0.00150227	0.00421704	protein_coding	5	6714718	6757161	+	terminal nucleotidyltransferase 4A
HMGCS1	ENSG00000112972	-0.122245	4.74676	0.01624	0.0341479	protein_coding	5	43289497	43313614	-	3-hydroxy-3-methylglutaryl-CoA synthase 1
DAP	ENSG00000112977	-0.256069	7.00157	1.31419e-11	1.51502e-10	protein_coding	5	10679342	10761384	-	death associated protein
NME5	ENSG00000112981	-0.562051	1.36942	4.66962e-06	2.25895e-05	protein_coding	5	137450866	137475132	-	NME/NM23 family member 5
KIF20A	ENSG00000112984	-0.239725	6.81801	2.929e-09	2.44717e-08	protein_coding	5	137514408	137523404	+	kinesin family member 20A
NNT	ENSG00000112992	-0.18874	7.2906	2.26438e-08	1.6618e-07	protein_coding	5	43602794	43707507	+	nicotinamide nucleotide transhydrogenase
MRPS30	ENSG00000112996	0.206259	6.2029	1.63088e-08	1.21928e-07	protein_coding	5	44809027	44820530	+	mitochondrial ribosomal protein S30
HSPA9	ENSG00000113013	0.208907	8.85761	7.17509e-08	4.83063e-07	protein_coding	5	137890571	137911133	-	heat shock protein family A (Hsp70) member 9
MRPS27	ENSG00000113048	0.132052	6.08271	0.00142679	0.00402352	protein_coding	5	71515236	71616473	-	mitochondrial ribosomal protein S27
HBEGF	ENSG00000113070	-0.194413	3.49826	0.00922863	0.0208796	protein_coding	5	139712428	139726216	-	heparin binding EGF like growth factor
LOX	ENSG00000113083	0.256613	6.87039	1.67887e-13	2.3843e-12	protein_coding	5	121398890	121413980	-	lysyl oxidase
APBB3	ENSG00000113108	-0.333312	4.04989	5.76753e-08	3.96109e-07	protein_coding	5	139937853	139973337	-	amyloid beta precursor protein binding family B member 3
SPARC	ENSG00000113140	-0.16877	10.7469	0.000218985	0.000750557	protein_coding	5	151040657	151066726	-	secreted protein acidic and cysteine rich
IK	ENSG00000113141	-0.104024	6.08217	0.00400203	0.0100317	protein_coding	5	140026643	140042064	+	IK cytokine
HMGCR	ENSG00000113161	0.107956	5.98682	0.0109305	0.0241922	protein_coding	5	74632154	74657929	+	3-hydroxy-3-methylglutaryl-CoA reductase
FAF2	ENSG00000113194	0.174518	7.12072	2.00932e-07	1.25261e-06	protein_coding	5	175874629	175937075	+	Fas associated factor family member 2
HAND1	ENSG00000113196	0.771932	0.0598799	4.2196e-05	0.000167282	protein_coding	5	153854532	153857824	-	heart and neural crest derivatives expressed 1
PCDHB3	ENSG00000113205	-0.670021	0.195876	0.000192727	0.000668044	protein_coding	5	140480234	140483406	+	protocadherin beta 3
PCDHB5	ENSG00000113209	-0.340299	3.35165	2.95416e-05	0.000120735	protein_coding	5	140514800	140517703	+	protocadherin beta 5
PCDHB7	ENSG00000113212	-0.352583	2.8021	4.07251e-06	1.99673e-05	protein_coding	5	140552243	140555957	+	protocadherin beta 7
CLK4	ENSG00000113240	-0.241003	4.61504	6.86527e-06	3.18391e-05	protein_coding	5	178029665	178057616	-	CDC like kinase 4
PCDHB15	ENSG00000113248	-0.290791	2.69351	0.002008	0.00546321	protein_coding	5	140625147	140627799	+	protocadherin beta 15
RNF130	ENSG00000113269	-0.293139	5.8699	7.26665e-16	1.32279e-14	protein_coding	5	179338651	179499118	-	ring finger protein 130
THG1L	ENSG00000113272	0.186497	3.66049	0.00556919	0.0134041	protein_coding	5	157158205	157168456	+	tRNA-histidine guanylyltransferase 1 like
THBS4	ENSG00000113296	-0.734482	2.03953	1.16268e-06	6.36133e-06	protein_coding	5	79287134	79379110	+	thrombospondin 4
CNOT6	ENSG00000113300	0.202527	5.72284	2.16758e-08	1.5944e-07	protein_coding	5	179921412	180005405	+	CCR4-NOT transcription complex subunit 6
MSH3	ENSG00000113318	-0.0837181	5.82073	0.0241272	0.0481459	protein_coding	5	79950467	80172279	+	mutS homolog 3
CCNG1	ENSG00000113328	-0.297383	6.77645	2.87179e-13	3.97082e-12	protein_coding	5	162864575	162873157	+	cyclin G1
POLR3G	ENSG00000113356	0.313163	4.03341	1.21697e-08	9.30989e-08	protein_coding	5	89767565	89810370	+	RNA polymerase III subunit G
CDH6	ENSG00000113361	0.195168	6.51809	6.84042e-09	5.42364e-08	protein_coding	5	31193857	31329253	+	cadherin 6
LMNB1	ENSG00000113368	0.175894	7.48438	1.29763e-05	5.70218e-05	protein_coding	5	126112315	126172712	+	lamin B1
FAM172A	ENSG00000113391	-0.800915	4.69648	4.53287e-44	2.95472e-42	protein_coding	5	92953775	93447404	-	family with sequence similarity 172 member A
TARS	ENSG00000113407	0.162611	7.45615	1.90567e-06	9.97992e-06	protein_coding	5	33440802	33469644	+	threonyl-tRNA synthetase 1
LNPEP	ENSG00000113441	0.583117	6.25004	9.14331e-40	5.36648e-38	protein_coding	5	96271098	96373219	+	leucyl and cystinyl aminopeptidase
RAD1	ENSG00000113456	0.0968715	5.15162	0.0187518	0.038581	protein_coding	5	34905369	34919094	-	RAD1 checkpoint DNA exonuclease
BRIX1	ENSG00000113460	0.225748	5.37216	1.21259e-06	6.61219e-06	protein_coding	5	34915481	34926101	+	biogenesis of ribosomes BRX1
SLC12A7	ENSG00000113504	0.416258	5.30772	3.57694e-21	1.01394e-19	protein_coding	5	1050499	1112150	-	solute carrier family 12 member 7
RAD50	ENSG00000113522	0.124861	6.6388	0.000363497	0.00118335	protein_coding	5	131891711	131980313	+	RAD50 double strand break repair protein
GNPDA1	ENSG00000113552	-0.212708	5.48268	9.32979e-08	6.14671e-07	protein_coding	5	141371314	141392606	-	glucosamine-6-phosphate deaminase 1
NUP155	ENSG00000113569	0.311071	6.32102	4.88088e-11	5.2145e-10	protein_coding	5	37288239	37371283	-	nucleoporin 155
NR3C1	ENSG00000113580	0.151573	6.84012	7.23079e-06	3.33484e-05	protein_coding	5	142657496	142815077	-	nuclear receptor subfamily 3 group C member 1
PPWD1	ENSG00000113593	0.1641	4.66351	0.000662365	0.00202839	protein_coding	5	64859063	64883376	+	peptidylprolyl isomerase domain and WD repeat containing 1
LIFR	ENSG00000113594	-0.330058	4.70673	7.00621e-13	9.33171e-12	protein_coding	5	38475065	38608456	-	LIF receptor subunit alpha
TRAPPC13	ENSG00000113597	0.210689	4.41953	9.60381e-06	4.32906e-05	protein_coding	5	64920543	64962060	+	trafficking protein particle complex 13
SEC24A	ENSG00000113615	0.179306	6.30236	8.19413e-07	4.59762e-06	protein_coding	5	133984479	134063513	+	SEC24 homolog A, COPII coat complex component
WWC1	ENSG00000113645	0.35769	3.69876	1.6412e-09	1.42334e-08	protein_coding	5	167718656	167899308	+	WW and C2 domain containing 1
TCERG1	ENSG00000113649	0.158383	6.39624	2.82682e-05	0.000115967	protein_coding	5	145826874	145891524	+	transcription elongation regulator 1
CSNK1A1	ENSG00000113712	0.0886031	6.9878	0.00768474	0.0178075	protein_coding	5	148871760	148931007	-	casein kinase 1 alpha 1
HMGXB3	ENSG00000113716	0.126691	6.36041	0.00205489	0.0055747	protein_coding	5	149379884	149432386	+	HMG-box containing 3
ERGIC1	ENSG00000113719	-0.22395	8.12353	9.51294e-11	9.75495e-10	protein_coding	5	172261278	172379688	+	endoplasmic reticulum-golgi intermediate compartment 1
PDGFRB	ENSG00000113721	0.392518	3.88961	1.80489e-10	1.79285e-09	protein_coding	5	149493400	149535435	-	platelet derived growth factor receptor beta
STC2	ENSG00000113739	0.838031	4.243	7.47042e-57	5.97001e-55	protein_coding	5	172741716	172756506	-	stanniocalcin 2
DBN1	ENSG00000113758	-0.337217	7.82518	8.04382e-22	2.41571e-20	protein_coding	5	176883609	176901402	-	drebrin 1
ZNF346	ENSG00000113761	0.282449	3.98414	5.5387e-07	3.20298e-06	protein_coding	5	176449697	176508190	+	zinc finger protein 346
SMC4	ENSG00000113810	0.321925	7.93811	1.88061e-21	5.43992e-20	protein_coding	3	160117062	160152750	+	structural maintenance of chromosomes 4
SELK	ENSG00000113811	0.201884	4.36653	4.28959e-05	0.000169676	protein_coding	3	53918437	53926015	-	selenoprotein K
TIMMDC1	ENSG00000113845	-0.105255	5.71296	0.0107017	0.0237713	protein_coding	3	119217379	119243937	+	translocase of inner mitochondrial membrane domain containing 1
BCL6	ENSG00000113916	-0.338897	5.17112	2.6792e-13	3.72639e-12	protein_coding	3	187439165	187463515	-	BCL6 transcription repressor
AMOTL2	ENSG00000114019	-0.19413	6.92143	0.000780194	0.00235256	protein_coding	3	134074716	134094321	-	angiomotin like 2
NIT2	ENSG00000114021	-0.127696	5.39319	0.00315517	0.00813077	protein_coding	3	100053545	100075710	+	nitrilase family member 2
KPNA1	ENSG00000114030	0.115424	5.88784	0.0073256	0.0171019	protein_coding	3	122140796	122233792	-	karyopherin subunit alpha 1
ARMC8	ENSG00000114098	0.170916	5.09841	5.52138e-05	0.000213504	protein_coding	3	137906109	138017231	+	armadillo repeat containing 8
CEP70	ENSG00000114107	-0.306917	4.34933	6.52769e-08	4.42213e-07	protein_coding	3	138213186	138313380	-	centrosomal protein 70
RBP1	ENSG00000114115	-0.692481	4.8993	6.72165e-14	9.98715e-13	protein_coding	3	139236276	139258671	-	retinol binding protein 1
RNF7	ENSG00000114125	-0.120282	5.57105	0.00106396	0.00310623	protein_coding	3	141457046	141466402	+	ring finger protein 7
TFDP2	ENSG00000114126	-0.194494	5.19677	1.39944e-06	7.54096e-06	protein_coding	3	141663277	141868386	-	transcription factor Dp-2
XRN1	ENSG00000114127	0.367773	5.50249	2.28442e-16	4.39037e-15	protein_coding	3	142025449	142166904	-	5'-3' exoribonuclease 1
KAT2B	ENSG00000114166	-0.11617	5.24639	0.00606358	0.014449	protein_coding	3	20081515	20195896	+	lysine acetyltransferase 2B
BCHE	ENSG00000114200	-0.269508	3.69532	4.24553e-05	0.000168263	protein_coding	3	165490692	165555260	-	butyrylcholinesterase
WNT5A	ENSG00000114251	-0.093812	6.09236	0.0117107	0.0257201	protein_coding	3	55499743	55523973	-	Wnt family member 5A
PFKFB4	ENSG00000114268	0.244409	6.36417	1.49399e-08	1.12407e-07	protein_coding	3	48555117	48599448	-	6-phosphofructo-2-kinase/fructose-2,6-biphosphatase 4
FGF12	ENSG00000114279	-0.348354	4.82686	2.99803e-15	5.0848e-14	protein_coding	3	191857184	192485553	-	fibroblast growth factor 12
PRKAR2A	ENSG00000114302	-0.251899	6.14476	2.94499e-12	3.67021e-11	protein_coding	3	48782030	48885279	-	protein kinase cAMP-dependent type II regulatory subunit alpha
HES1	ENSG00000114315	-0.432017	5.50852	1.08807e-29	4.70665e-28	protein_coding	3	193853934	193856521	+	hes family bHLH transcription factor 1
ACAP2	ENSG00000114331	0.120439	5.60644	0.00394226	0.00991346	protein_coding	3	194995465	195163807	-	ArfGAP with coiled-coil, ankyrin repeat and PH domains 2
GNAI2	ENSG00000114353	-0.197055	8.50336	3.51368e-09	2.9116e-08	protein_coding	3	50263724	50296787	+	G protein subunit alpha i2
RPL24	ENSG00000114391	-0.180222	7.76373	1.0556e-07	6.90634e-07	protein_coding	3	101399935	101405626	-	ribosomal protein L24
CBLB	ENSG00000114423	-0.415692	4.01972	8.25732e-14	1.20911e-12	protein_coding	3	105374305	105588396	-	Cbl proto-oncogene B
BBX	ENSG00000114439	0.154764	7.43936	1.15437e-05	5.12509e-05	protein_coding	3	107241783	107530171	+	BBX high mobility group box domain containing
IFT57	ENSG00000114446	-0.209497	6.00622	2.76003e-08	1.99901e-07	protein_coding	3	107879659	107941417	-	intraflagellar transport 57
GNB4	ENSG00000114450	0.56637	4.69251	2.76028e-28	1.12845e-26	protein_coding	3	179116990	179169378	-	G protein subunit beta 4
GBE1	ENSG00000114480	-0.0782927	6.20397	0.0226722	0.0455667	protein_coding	3	81538850	81811312	-	1,4-alpha-glucan branching enzyme 1
UMPS	ENSG00000114491	0.120616	4.80925	0.0130047	0.0281443	protein_coding	3	124449213	124464040	+	uridine monophosphate synthetase
FRMD4B	ENSG00000114541	0.364857	3.4631	9.89817e-07	5.47202e-06	protein_coding	3	69219141	69591734	-	FERM domain containing 4B
SLC41A3	ENSG00000114544	-0.147194	4.75124	0.004887	0.0119721	protein_coding	3	125725198	125820404	-	solute carrier family 41 member 3
PLXNA1	ENSG00000114554	0.276164	7.73189	6.14657e-13	8.2177e-12	protein_coding	3	126707437	126756235	+	plexin A1
ABTB1	ENSG00000114626	-0.473103	3.52611	3.52091e-11	3.83397e-10	protein_coding	3	127391778	127399768	+	ankyrin repeat and BTB domain containing 1
NEK11	ENSG00000114670	-0.213389	2.68093	0.00619597	0.0147223	protein_coding	3	130745694	131069309	+	NIMA related kinase 11
MRPL3	ENSG00000114686	-0.195552	6.84735	1.3314e-06	7.20452e-06	protein_coding	3	131181056	131221827	-	mitochondrial ribosomal protein L3
PLSCR4	ENSG00000114698	0.405673	2.36429	0.00037272	0.00121003	protein_coding	3	145910126	145968966	-	phospholipid scramblase 4
HEMK1	ENSG00000114735	-0.312499	4.32574	7.78211e-10	7.08353e-09	protein_coding	3	50606583	50622366	+	HemK methyltransferase family member 1
MAPKAPK3	ENSG00000114738	-0.105318	6.29443	0.0025548	0.00676228	protein_coding	3	50648951	50686720	+	MAPK activated protein kinase 3
PEX5L	ENSG00000114757	0.536502	4.98777	2.94702e-31	1.38032e-29	protein_coding	3	179512746	179754841	-	peroxisomal biogenesis factor 5 like
RRP9	ENSG00000114767	-0.121663	4.397	0.0164585	0.0344845	protein_coding	3	51967446	51975957	-	ribosomal RNA processing 9, U3 small nucleolar RNA binding protein
ABHD14B	ENSG00000114779	-0.345827	3.78532	3.79687e-09	3.12618e-08	protein_coding	3	52002526	52017425	-	abhydrolase domain containing 14B
ARHGEF26	ENSG00000114790	0.10879	5.13184	0.0177853	0.036839	protein_coding	3	153838792	153975616	+	Rho guanine nucleotide exchange factor 26
KLHL24	ENSG00000114796	-0.67035	4.31151	1.97377e-17	4.16079e-16	protein_coding	3	183353356	183402265	+	kelch like family member 24
DNAH1	ENSG00000114841	-0.695771	1.60377	7.94059e-07	4.46421e-06	protein_coding	3	52350335	52434507	+	dynein axonemal heavy chain 1
FOXP1	ENSG00000114861	-0.117217	5.29402	0.00589988	0.0140999	protein_coding	3	71003844	71633140	-	forkhead box P1
EIF4G1	ENSG00000114867	0.232112	9.5288	1.41356e-08	1.06981e-07	protein_coding	3	184032283	184053146	+	eukaryotic translation initiation factor 4 gamma 1
NEK4	ENSG00000114904	0.163087	4.88321	0.000253899	0.000854893	protein_coding	3	52744800	52804965	-	NIMA related kinase 4
SLC4A3	ENSG00000114923	-0.453011	5.33583	3.55216e-29	1.50887e-27	protein_coding	2	220492049	220506702	+	solute carrier family 4 member 3
INO80D	ENSG00000114933	0.197131	3.61844	0.00618507	0.0146989	protein_coding	2	206858445	206951027	-	INO80 complex subunit D
EEF1B2	ENSG00000114942	-0.276071	7.35438	9.68437e-16	1.72526e-14	protein_coding	2	207024309	207027652	+	eukaryotic translation elongation factor 1 beta 2
ADAM23	ENSG00000114948	-0.373998	4.30067	8.60207e-11	8.90097e-10	protein_coding	2	207308263	207485851	+	ADAM metallopeptidase domain 23
MOB1A	ENSG00000114978	0.126567	7.78479	0.000160616	0.000565425	protein_coding	2	74379655	74406025	-	MOB kinase activator 1A
KANSL3	ENSG00000114982	0.157537	6.72576	5.77522e-06	2.73946e-05	protein_coding	2	97258907	97308524	-	KAT8 regulatory NSL complex subunit 3
LMAN2L	ENSG00000114988	0.187296	5.58854	3.53405e-07	2.11103e-06	protein_coding	2	97371666	97405801	-	lectin, mannose binding 2 like
FAHD2A	ENSG00000115042	-0.212435	4.25697	4.69927e-05	0.000184233	protein_coding	2	96068469	96082364	+	fumarylacetoacetate hydrolase domain containing 2A
NCL	ENSG00000115053	0.172319	8.99293	1.46816e-06	7.87312e-06	protein_coding	2	232318242	232348352	-	nucleolin
ACTR1B	ENSG00000115073	-0.299567	5.88396	1.36322e-11	1.56643e-10	protein_coding	2	98272431	98280570	-	actin related protein 1B
ACTR3	ENSG00000115091	-0.0887942	8.17905	0.00627474	0.014877	protein_coding	2	114647537	114720173	+	actin related protein 3
SF3B14	ENSG00000115128	-0.0933991	5.71499	0.0200272	0.0408721	protein_coding	2	24290454	24299313	-	splicing factor 3b subunit 6
CENPA	ENSG00000115163	-0.174737	5.33384	0.000377116	0.00122234	protein_coding	2	26987157	27023935	+	centromere protein A
TANC1	ENSG00000115183	-0.121857	7.86516	0.000152292	0.000540026	protein_coding	2	159825146	160089170	+	tetratricopeptide repeat, ankyrin repeat and coiled-coil containing 1
EIF2B4	ENSG00000115211	-0.14608	5.0662	0.000400554	0.00128798	protein_coding	2	27587219	27593353	-	eukaryotic translation initiation factor 2B subunit delta
NRBP1	ENSG00000115216	-0.184401	6.96443	1.08634e-07	7.078e-07	protein_coding	2	27650657	27665126	+	nuclear receptor binding protein 1
FNDC4	ENSG00000115226	-0.520799	5.35351	1.02788e-24	3.62577e-23	protein_coding	2	27714750	27718112	-	fibronectin type III domain containing 4
SNX17	ENSG00000115234	-0.219586	6.50139	6.22222e-09	4.9725e-08	protein_coding	2	27593389	27599995	+	sorting nexin 17
REEP6	ENSG00000115255	-0.65884	1.17455	6.14365e-06	2.89384e-05	protein_coding	19	1491165	1497926	+	receptor accessory protein 6
PCSK4	ENSG00000115257	-0.542997	1.52445	2.28899e-05	9.62477e-05	protein_coding	19	1481427	1490751	-	proprotein convertase subtilisin/kexin type 4
IFIH1	ENSG00000115267	2.82353	5.93677	0	0	protein_coding	2	163123589	163175213	-	interferon induced with helicase C domain 1
INO80B	ENSG00000115274	-0.205283	4.39905	0.00113264	0.00328302	protein_coding	2	74682150	74688011	+	INO80 complex subunit B
MOGS	ENSG00000115275	0.150823	6.52219	0.000188153	0.00065311	protein_coding	2	74688184	74692537	-	mannosyl-oligosaccharide glucosidase
NDUFS7	ENSG00000115286	-0.152058	4.6998	0.000876217	0.00260608	protein_coding	19	1383526	1395583	+	NADH:ubiquinone oxidoreductase core subunit S7
TLX2	ENSG00000115297	-0.579958	0.944468	3.97935e-05	0.000158379	protein_coding	2	74740590	74744274	+	T cell leukemia homeobox 2
SPTBN1	ENSG00000115306	0.0744343	9.75892	0.0217211	0.0439047	protein_coding	2	54683422	54896812	+	spectrin beta, non-erythrocytic 1
AUP1	ENSG00000115307	0.0969736	6.92602	0.00876713	0.0199375	protein_coding	2	74753772	74757066	-	AUP1 lipid droplet regulating VLDL assembly factor
HTRA2	ENSG00000115317	-0.234328	4.15572	1.25752e-05	5.54648e-05	protein_coding	2	74756504	74760472	+	HtrA serine peptidase 2
GALNT3	ENSG00000115339	0.521784	1.82117	6.27326e-06	2.9441e-05	protein_coding	2	166604101	166651192	-	polypeptide N-acetylgalactosaminyltransferase 3
POLE4	ENSG00000115350	-0.274828	3.65126	5.17177e-06	2.47982e-05	protein_coding	2	75185619	75197255	+	DNA polymerase epsilon 4, accessory subunit
LANCL1	ENSG00000115365	-0.123389	6.37028	0.00160752	0.00447869	protein_coding	2	211295973	211342376	-	LanC like 1
WDR75	ENSG00000115368	0.217908	5.04398	3.05907e-06	1.53278e-05	protein_coding	2	190306159	190340291	+	WD repeat domain 75
EFEMP1	ENSG00000115380	-0.0786675	10.1203	0.0162067	0.0340933	protein_coding	2	56093102	56151274	-	EGF containing fibulin extracellular matrix protein 1
FANCL	ENSG00000115392	0.331397	3.91505	4.02393e-07	2.38053e-06	protein_coding	2	58386378	58468507	-	FA complementation group L
FN1	ENSG00000115414	-0.148401	9.90227	0.00202763	0.00550918	protein_coding	2	216225163	216300895	-	fibronectin 1
STAT1	ENSG00000115415	2.57265	8.96167	0	0	protein_coding	2	191829084	191885686	-	signal transducer and activator of transcription 1
PAPOLG	ENSG00000115421	0.189002	4.08231	0.000715663	0.0021742	protein_coding	2	60983365	61029220	+	poly(A) polymerase gamma
PECR	ENSG00000115425	-0.238864	3.72875	8.34152e-05	0.000310339	protein_coding	2	216861052	216947678	-	peroxisomal trans-2-enoyl-CoA reductase
ELMOD3	ENSG00000115459	0.20626	4.34331	0.000298017	0.0009863	protein_coding	2	85581517	85618875	+	ELMO domain containing 3
IGFBP5	ENSG00000115461	-0.440688	6.69128	1.78369e-20	4.79665e-19	protein_coding	2	217536828	217560248	-	insulin like growth factor binding protein 5
USP34	ENSG00000115464	-0.141737	6.88814	0.000390928	0.00126055	protein_coding	2	61414598	61697904	-	ubiquitin specific peptidase 34
EFHD1	ENSG00000115468	-0.325895	1.9754	0.00422251	0.0105154	protein_coding	2	233470767	233547491	+	EF-hand domain family member D1
CCT4	ENSG00000115484	0.0905808	7.53696	0.0203081	0.0413737	protein_coding	2	62095224	62115939	-	chaperonin containing TCP1 subunit 4
SF3B1	ENSG00000115524	0.0814006	8.09659	0.0158669	0.0334825	protein_coding	2	198254508	198299815	-	splicing factor 3b subunit 1
ST3GAL5	ENSG00000115525	-0.309981	4.14484	9.38927e-09	7.32145e-08	protein_coding	2	86066267	86116137	-	ST3 beta-galactoside alpha-2,3-sialyltransferase 5
PDCL3	ENSG00000115539	-0.163583	4.84945	0.000409016	0.00131191	protein_coding	2	101179152	101193197	+	phosducin like 3
MOB4	ENSG00000115540	0.136659	5.19626	0.00271808	0.00715032	protein_coding	2	198380295	198418423	+	MOB family member 4, phocein
HSPE1	ENSG00000115541	0.224781	4.57653	1.55506e-05	6.72874e-05	protein_coding	2	198364718	198368181	+	heat shock protein family E (Hsp10) member 1
CHMP3	ENSG00000115561	-0.242567	5.73412	4.77783e-09	3.86627e-08	protein_coding	2	86730554	86948245	-	charged multivesicular body protein 3
ZNF142	ENSG00000115568	0.242817	5.27334	5.69965e-06	2.71179e-05	protein_coding	2	219502639	219524378	-	zinc finger protein 142
IL1R1	ENSG00000115594	0.590418	2.76315	1.71782e-13	2.43229e-12	protein_coding	2	102681004	102796334	+	interleukin 1 receptor type 1
WNT6	ENSG00000115596	-0.858595	1.80675	2.929e-10	2.81077e-09	protein_coding	2	219724544	219738955	+	Wnt family member 6
FHL2	ENSG00000115641	-0.210623	7.44549	2.59923e-07	1.58406e-06	protein_coding	2	105974169	106054970	-	four and a half LIM domains 2
ABCB6	ENSG00000115657	-0.395077	0.376949	0.0205609	0.0418346	protein_coding	2	220074490	220083712	-	ATP binding cassette subfamily B member 6 (Langereis blood group)
STK16	ENSG00000115661	-0.344091	4.92109	4.35331e-13	5.94378e-12	protein_coding	2	220110177	220115059	+	serine/threonine kinase 16
HDLBP	ENSG00000115677	-0.176389	9.06761	6.79689e-09	5.39517e-08	protein_coding	2	242166679	242256476	-	high density lipoprotein binding protein
PASK	ENSG00000115687	0.265997	4.68591	1.47132e-05	6.39972e-05	protein_coding	2	242045514	242089679	-	PAS domain containing serine/threonine kinase
STK25	ENSG00000115694	-0.150489	6.66685	6.44478e-06	3.0136e-05	protein_coding	2	242432089	242449145	-	serine/threonine kinase 25
ID2	ENSG00000115738	-0.146485	7.44708	0.0160052	0.0337397	protein_coding	2	8818975	8824583	+	inhibitor of DNA binding 2
ODC1	ENSG00000115758	-0.28091	8.33606	4.82528e-15	8.04877e-14	protein_coding	2	10580094	10588630	-	ornithine decarboxylase 1
BIRC6	ENSG00000115760	0.135511	7.07345	0.000972673	0.00286277	protein_coding	2	32582096	32843966	+	baculoviral IAP repeat containing 6
CEBPZ	ENSG00000115816	0.205723	5.58184	3.85021e-08	2.72579e-07	protein_coding	2	37428755	37458856	-	CCAAT enhancer binding protein zeta
PRKD3	ENSG00000115825	0.120559	6.21464	0.00212413	0.00574157	protein_coding	2	37477645	37551951	-	protein kinase D3
RAB3GAP1	ENSG00000115839	0.145881	5.93105	5.50409e-05	0.000212952	protein_coding	2	135809835	135933964	+	RAB3 GTPase activating protein catalytic subunit 1
SLC25A12	ENSG00000115840	0.229053	4.96981	1.75631e-07	1.10956e-06	protein_coding	2	172640880	172864766	-	solute carrier family 25 member 12
SRSF7	ENSG00000115875	0.157481	6.83265	4.05365e-06	1.98886e-05	protein_coding	2	38970741	38978636	-	serine and arginine rich splicing factor 7
SDC1	ENSG00000115884	0.14245	8.28936	0.00142271	0.00401441	protein_coding	2	20400558	20425194	-	syndecan 1
SLC1A4	ENSG00000115902	0.38308	5.53437	1.41048e-12	1.81871e-11	protein_coding	2	65215611	65250999	+	solute carrier family 1 member 4
SOS1	ENSG00000115904	0.0951351	6.25459	0.00664561	0.0156566	protein_coding	2	39208537	39351486	-	SOS Ras/Rac guanine nucleotide exchange factor 1
KYNU	ENSG00000115919	0.482464	3.32767	8.96295e-13	1.1777e-11	protein_coding	2	143635067	143799890	+	kynureninase
WIPF1	ENSG00000115935	0.163772	6.61644	6.85407e-06	3.17976e-05	protein_coding	2	175424300	175547644	-	WAS/WASL interacting protein family member 1
ORC2	ENSG00000115942	0.16893	5.5552	1.14908e-05	5.10484e-05	protein_coding	2	201773696	201828403	-	origin recognition complex subunit 2
COX7A2L	ENSG00000115944	-0.117623	5.67491	0.00378892	0.00956358	protein_coding	2	42560686	42652228	-	cytochrome c oxidase subunit 7A2 like
PNO1	ENSG00000115946	-0.12046	4.52118	0.0109091	0.0241562	protein_coding	2	68384976	68403370	+	partner of NOB1 homolog
RND3	ENSG00000115963	0.352681	5.96235	1.11276e-14	1.78054e-13	protein_coding	2	151324709	151395525	-	Rho family GTPase 3
AAK1	ENSG00000115977	0.134263	4.51096	0.0102103	0.0227944	protein_coding	2	69688532	69901481	-	AP2 associated kinase 1
TRAK2	ENSG00000115993	-0.270372	6.14326	2.53617e-13	3.54137e-12	protein_coding	2	202241930	202316302	-	trafficking kinesin protein 2
TIA1	ENSG00000116001	0.124693	6.16886	0.00217816	0.00586299	protein_coding	2	70436576	70475792	-	TIA1 cytotoxic granule associated RNA binding protein
PCYOX1	ENSG00000116005	-0.238716	7.22605	4.23586e-12	5.15187e-11	protein_coding	2	70484518	70508323	+	prenylcysteine oxidase 1
EPAS1	ENSG00000116016	-0.253636	6.06123	3.34989e-13	4.60041e-12	protein_coding	2	46520806	46613836	+	endothelial PAS domain protein 1
ARID3A	ENSG00000116017	0.262521	3.39111	4.30306e-05	0.000170114	protein_coding	19	925781	975939	+	AT-rich interaction domain 3A
SUMO1	ENSG00000116030	-0.110954	6.58708	0.00411004	0.0102749	protein_coding	2	203070903	203103331	-	small ubiquitin like modifier 1
GRIN3B	ENSG00000116032	-0.495146	0.6644	0.00180533	0.00496102	protein_coding	19	1000418	1009731	+	glutamate ionotropic receptor NMDA type subunit 3B
NFE2L2	ENSG00000116044	0.126487	6.41436	0.00118425	0.0034125	protein_coding	2	178092323	178257425	-	nuclear factor, erythroid 2 like 2
EPHA4	ENSG00000116106	-0.304222	4.93965	2.76244e-10	2.65814e-09	protein_coding	2	222282747	222438922	-	EPH receptor A4
DNAJC16	ENSG00000116138	0.14655	4.94689	0.00264724	0.00697823	protein_coding	1	15853308	15918874	+	DnaJ heat shock protein family (Hsp40) member C16
GPX7	ENSG00000116157	-0.148918	4.1967	0.0199656	0.0407758	protein_coding	1	53068044	53074723	+	glutathione peroxidase 7
CACYBP	ENSG00000116161	0.104112	6.03558	0.00541315	0.013091	protein_coding	1	174968300	174980851	+	calcyclin binding protein
SCP2	ENSG00000116171	-0.124274	5.84375	0.00235479	0.00629292	protein_coding	1	53392901	53517375	+	sterol carrier protein 2
ANGPTL1	ENSG00000116194	2.68543	0.855119	1.44039e-57	1.16425e-55	protein_coding	1	178818840	178840187	-	angiopoietin like 1
CEP104	ENSG00000116198	0.0955474	5.65671	0.0107883	0.0239223	protein_coding	1	3728645	3773778	-	centrosomal protein 104
LRRC42	ENSG00000116212	0.141343	4.53797	0.00515009	0.0125341	protein_coding	1	54411750	54433841	+	leucine rich repeat containing 42
WRAP73	ENSG00000116213	0.121187	4.69536	0.012712	0.0276038	protein_coding	1	3547331	3569325	-	WD repeat containing, antisense to TP73
MRPL37	ENSG00000116221	-0.102972	6.66964	0.0124328	0.0270975	protein_coding	1	54649714	54691137	+	mitochondrial ribosomal protein L37
ICMT	ENSG00000116237	0.207229	7.59847	2.03527e-09	1.74056e-08	protein_coding	1	6281253	6296032	-	isoprenylcysteine carboxyl methyltransferase
RPL22	ENSG00000116251	-0.238761	7.23152	2.71834e-10	2.62285e-09	protein_coding	1	6241329	6269449	-	ribosomal protein L22
PARK7	ENSG00000116288	-0.289438	7.24435	2.41544e-15	4.13136e-14	protein_coding	1	8014351	8045565	+	Parkinsonism associated deglycase
KIAA1324	ENSG00000116299	-0.38931	0.931943	0.00647651	0.0153066	protein_coding	1	109656301	109749401	+	KIAA1324
AMPD2	ENSG00000116337	-0.277022	6.33168	1.67289e-14	2.63215e-13	protein_coding	1	110158726	110174673	+	adenosine monophosphate deaminase 2
SRSF4	ENSG00000116350	0.149591	6.34807	1.91449e-05	8.18634e-05	protein_coding	1	29474255	29508499	-	serine and arginine rich splicing factor 4
KCNC4	ENSG00000116396	0.216059	3.28529	0.00449101	0.0111255	protein_coding	1	110753965	110825722	+	potassium voltage-gated channel subfamily C member 4
WDR77	ENSG00000116455	-0.124751	4.18023	0.0161045	0.0339288	protein_coding	1	111982512	111991998	-	WD repeat domain 77
ATP5F1	ENSG00000116459	-0.33011	6.84828	3.16381e-22	9.68659e-21	protein_coding	1	111991486	112005395	+	ATP synthase peripheral stalk-membrane subunit b
RAP1A	ENSG00000116473	-0.1907	5.06315	7.13436e-05	0.000269324	protein_coding	1	112084840	112259313	+	RAP1A, member of RAS oncogene family
S100PBP	ENSG00000116497	0.291535	4.35533	7.47623e-08	4.99897e-07	protein_coding	1	33282368	33324476	+	S100P binding protein
RNF19B	ENSG00000116514	0.378943	4.65821	1.43833e-16	2.82163e-15	protein_coding	1	33402046	33430286	-	ring finger protein 19B
RHOU	ENSG00000116574	-0.301534	4.19386	4.53418e-06	2.19986e-05	protein_coding	1	228870824	228882416	+	ras homolog family member U
ARHGEF2	ENSG00000116584	0.455458	5.60353	1.34101e-25	4.97863e-24	protein_coding	1	155916630	155976861	-	Rho/Rac guanine nucleotide exchange factor 2
LAMTOR2	ENSG00000116586	-0.301261	4.1084	3.20785e-06	1.5994e-05	protein_coding	1	156024543	156028301	+	late endosomal/lysosomal adaptor, MAPK and MTOR activator 2
MEF2D	ENSG00000116604	-0.103236	5.05204	0.020391	0.0415188	protein_coding	1	156433519	156470620	-	myocyte enhancer factor 2D
DOCK7	ENSG00000116641	-0.192594	6.217	1.49714e-06	8.00042e-06	protein_coding	1	62920399	63153969	-	dedicator of cytokinesis 7
FBXO2	ENSG00000116661	-0.590761	2.21215	1.96516e-06	1.02876e-05	protein_coding	1	11708424	11715842	-	F-box protein 2
FBXO6	ENSG00000116663	0.758379	3.7191	7.31652e-35	3.84729e-33	protein_coding	1	11724181	11734411	+	F-box protein 6
C1orf21	ENSG00000116667	-0.191187	4.76192	3.0519e-05	0.000124371	protein_coding	1	184356192	184598154	+	chromosome 1 open reading frame 21
DNAJC6	ENSG00000116675	0.156038	4.32397	0.0122697	0.0267667	protein_coding	1	65713902	65881552	+	DnaJ heat shock protein family (Hsp40) member C6
LEPR	ENSG00000116678	-0.608449	1.81665	4.04133e-07	2.38983e-06	protein_coding	1	65886248	66107242	+	leptin receptor
IVNS1ABP	ENSG00000116679	0.127269	7.12273	0.000188786	0.000655147	protein_coding	1	185265520	185286461	-	influenza virus NS1A binding protein
KIAA2013	ENSG00000116685	0.156933	6.78362	5.0103e-06	2.41057e-05	protein_coding	1	11979648	11986485	-	KIAA2013
MFN2	ENSG00000116688	0.0950249	7.50382	0.0157693	0.0332871	protein_coding	1	12040238	12073571	+	mitofusin 2
SMG7	ENSG00000116698	0.350237	7.43866	2.79058e-27	1.10259e-25	protein_coding	1	183441351	183567381	+	SMG7 nonsense mediated mRNA decay factor
SLC35D1	ENSG00000116704	0.152641	5.25549	0.00115353	0.00333538	protein_coding	1	67465015	67519782	-	solute carrier family 35 member D1
GADD45A	ENSG00000116717	0.298319	5.90984	1.65577e-11	1.88271e-10	protein_coding	1	68150744	68154021	+	growth arrest and DNA damage inducible alpha
WLS	ENSG00000116729	0.143235	6.41327	8.15994e-05	0.000304304	protein_coding	1	68564142	68698803	-	Wnt ligand secretion mediator
PRDM2	ENSG00000116731	0.116392	5.07487	0.0194019	0.039722	protein_coding	1	14026693	14151574	+	PR/SET domain 2
RGS2	ENSG00000116741	0.788059	4.62917	1.3369e-56	1.05058e-54	protein_coding	1	192778169	192781403	+	regulator of G protein signaling 2
UCHL5	ENSG00000116750	0.212702	5.8681	2.81781e-08	2.03669e-07	protein_coding	1	192981380	193029237	-	ubiquitin C-terminal hydrolase L5
CTH	ENSG00000116761	0.492474	1.66623	0.000100404	0.000367265	protein_coding	1	70876901	70905534	+	cystathionine gamma-lyase
OLFML3	ENSG00000116774	0.641242	1.17933	8.23852e-07	4.62069e-06	protein_coding	1	114522063	114524876	+	olfactomedin like 3
PLEKHM2	ENSG00000116786	0.130336	6.4477	0.0004249	0.00135793	protein_coding	1	16010827	16061264	+	pleckstrin homology and RUN domain containing M2
PHTF1	ENSG00000116793	0.235406	5.78428	1.74442e-10	1.73644e-09	protein_coding	1	114239453	114302111	-	putative homeodomain transcription factor 1
CD58	ENSG00000116815	0.12453	5.75324	0.00311621	0.00805182	protein_coding	1	117057157	117113661	-	CD58 molecule
TTF2	ENSG00000116830	0.182324	5.44913	1.63746e-05	7.06369e-05	protein_coding	1	117602925	117650075	+	transcription termination factor 2
NR5A2	ENSG00000116833	-0.493367	0.949477	0.000565115	0.00175876	protein_coding	1	199996730	200146552	+	nuclear receptor subfamily 5 group A member 2
TMEM9	ENSG00000116857	-0.0993341	6.03909	0.0103575	0.023083	protein_coding	1	201103900	201140702	-	transmembrane protein 9
ADPRHL2	ENSG00000116863	0.524158	5.21058	5.64382e-40	3.34024e-38	protein_coding	1	36554476	36559533	+	ADP-ribosylhydrolase like 2
MAP7D1	ENSG00000116871	0.165472	7.98498	3.35639e-06	1.66758e-05	protein_coding	1	36621180	36646450	+	MAP7 domain containing 1
OSCP1	ENSG00000116885	-0.327398	2.65063	0.00150682	0.00422813	protein_coding	1	36881428	36916086	-	organic solute carrier partner 1
MRPS15	ENSG00000116898	-0.162607	5.7814	3.47907e-05	0.000140164	protein_coding	1	36921319	36930038	-	mitochondrial ribosomal protein S15
EXOC8	ENSG00000116903	0.205262	4.17002	0.000132624	0.00047565	protein_coding	1	231468480	231473598	-	exocyst complex component 8
GNPAT	ENSG00000116906	-0.120573	5.44528	0.00302964	0.00785595	protein_coding	1	231376953	231413719	+	glyceronephosphate O-acyltransferase
NID1	ENSG00000116962	0.326703	7.87654	7.17685e-19	1.7033e-17	protein_coding	1	236139130	236228462	-	nidogen 1
LGALS8	ENSG00000116977	0.290614	6.14615	1.82517e-16	3.55118e-15	protein_coding	1	236681300	236716281	+	galectin 8
MTR	ENSG00000116984	0.0892793	5.77942	0.0161701	0.0340366	protein_coding	1	236958610	237067281	+	5-methyltetrahydrofolate-homocysteine methyltransferase
SIPA1L2	ENSG00000116991	-0.281998	4.31056	9.5153e-06	4.29464e-05	protein_coding	1	232533711	232697304	-	signal induced proliferation associated 1 like 2
RLF	ENSG00000117000	0.174287	4.57425	0.00053454	0.00167391	protein_coding	1	40627045	40706593	+	rearranged L-myc fusion
ZNF684	ENSG00000117010	0.602013	1.42991	3.10007e-07	1.86916e-06	protein_coding	1	40997233	41013841	+	zinc finger protein 684
ST6GALNAC5	ENSG00000117069	-1.2518	2.1687	2.62928e-22	8.13813e-21	protein_coding	1	77333126	77531396	+	ST6 N-acetylgalactosaminide alpha-2,6-sialyltransferase 5
PADI2	ENSG00000117115	0.252129	4.77657	9.33526e-06	4.22146e-05	protein_coding	1	17393256	17445948	-	peptidyl arginine deiminase 2
RPF1	ENSG00000117133	0.0982319	5.19992	0.0211724	0.0428997	protein_coding	1	84944942	84963473	+	ribosome production factor 1 homolog
RGS4	ENSG00000117152	0.199055	7.07165	1.33505e-07	8.59937e-07	protein_coding	1	163038565	163046592	+	regulator of G protein signaling 4
KLHL12	ENSG00000117153	0.103646	5.29495	0.0106149	0.0236118	protein_coding	1	202860228	202897764	-	kelch like family member 12
SSX2IP	ENSG00000117155	0.154277	6.38368	4.28307e-05	0.00016953	protein_coding	1	85109390	85156486	-	SSX family member 2 interacting protein
ZNHIT6	ENSG00000117174	0.132033	4.15875	0.0139057	0.0298296	protein_coding	1	86115106	86174116	-	zinc finger HIT-type containing 6
RBBP5	ENSG00000117222	0.242968	6.01018	8.37591e-10	7.58983e-09	protein_coding	1	205055270	205091143	-	RB binding protein 5, histone lysine methyltransferase complex subunit
GBP3	ENSG00000117226	1.09571	4.55855	1.16632e-101	1.36344e-99	protein_coding	1	89472349	89488577	-	guanylate binding protein 3
GBP1	ENSG00000117228	1.44395	5.47913	2.40393534187213e-315	5.76333312045132e-313	protein_coding	1	89518002	89531043	-	guanylate binding protein 1
PINK1-AS	ENSG00000117242	-0.284698	2.36482	0.00353167	0.00897833	antisense	1	20969150	20978686	-
CDK18	ENSG00000117266	0.553705	2.68236	1.5084e-11	1.72067e-10	protein_coding	1	205473723	205501921	+	cyclin dependent kinase 18
ECE1	ENSG00000117298	0.35979	9.24475	3.48326e-27	1.36863e-25	protein_coding	1	21543740	21671997	-	endothelin converting enzyme 1
HMGCL	ENSG00000117305	-0.186357	4.4374	0.000318513	0.00104825	protein_coding	1	24128375	24165110	-	3-hydroxy-3-methylglutaryl-CoA lyase
ID3	ENSG00000117318	-0.366309	8.36034	4.03831e-13	5.51902e-12	protein_coding	1	23884409	23886285	-	inhibitor of DNA binding 3, HLH protein
PRPF3	ENSG00000117360	0.198564	5.28316	3.89974e-06	1.92215e-05	protein_coding	1	150293925	150325671	+	pre-mRNA processing factor 3
LEPRE1	ENSG00000117385	0.127874	6.8484	0.00103265	0.00302295	protein_coding	1	43212006	43232755	-	prolyl 3-hydroxylase 1
SLC2A1	ENSG00000117394	0.186287	8.9243	0.000668296	0.00204346	protein_coding	1	43391052	43424530	-	solute carrier family 2 member 1
EBNA1BP2	ENSG00000117395	-0.0999952	5.5418	0.0196184	0.0401247	protein_coding	1	43629846	43736607	-	EBNA1 binding protein 2
CDC20	ENSG00000117399	-0.126168	6.95302	0.0154405	0.0327003	protein_coding	1	43824626	43828874	+	cell division cycle 20
ATP6V0B	ENSG00000117410	0.10418	6.93144	0.00662768	0.015617	protein_coding	1	44440159	44443967	+	ATPase H+ transporting V0 subunit b
B4GALT2	ENSG00000117411	-0.119178	5.98249	0.00276045	0.00723835	protein_coding	1	44444615	44456840	+	beta-1,4-galactosyltransferase 2
ERI3	ENSG00000117419	-0.205584	5.75394	1.86401e-07	1.1708e-06	protein_coding	1	44686742	44820932	-	ERI1 exoribonuclease family member 3
PTCH2	ENSG00000117425	-0.734578	0.380582	2.21256e-05	9.33117e-05	protein_coding	1	45285516	45308735	-	patched 2
AKR1A1	ENSG00000117448	-0.129322	5.18167	0.00336048	0.00860498	protein_coding	1	46016215	46035721	+	aldo-keto reductase family 1 member A1
PIK3R3	ENSG00000117461	0.337708	5.34145	3.23359e-16	6.09854e-15	protein_coding	1	46505812	46642160	-	phosphoinositide-3-kinase regulatory subunit 3
BLZF1	ENSG00000117475	0.731528	4.65695	2.9712e-56	2.30921e-54	protein_coding	1	169337208	169365778	+	basic leucine zipper nuclear factor 1
NSUN4	ENSG00000117481	0.28177	3.95346	6.87243e-06	3.18619e-05	protein_coding	1	46805849	46830824	+	NOP2/Sun RNA methyltransferase 4
TMED5	ENSG00000117500	0.402862	6.58973	1.65583e-21	4.8094e-20	protein_coding	1	93615299	93646285	-	transmembrane p24 trafficking protein 5
CNN3	ENSG00000117519	-0.138647	7.88207	9.58526e-05	0.000352113	protein_coding	1	95362507	95392834	-	calponin 3
PRRC2C	ENSG00000117523	0.158017	7.41787	6.11284e-05	0.000234009	protein_coding	1	171454651	171562650	+	proline rich coiled-coil 2C
F3	ENSG00000117525	0.215577	4.34298	7.07587e-05	0.000267401	protein_coding	1	94994781	95007356	-	coagulation factor III, tissue factor
VAMP4	ENSG00000117533	-0.152484	4.03011	0.0117677	0.0258188	protein_coding	1	171669300	171711387	-	vesicle associated membrane protein 4
PTBP2	ENSG00000117569	-0.146767	3.90514	0.0100517	0.0224829	protein_coding	1	97187221	97289294	+	polypyrimidine tract binding protein 2
TNFSF4	ENSG00000117586	0.312099	5.8833	1.73777e-12	2.22048e-11	protein_coding	1	173152873	173176452	-	TNF superfamily member 4
DARS2	ENSG00000117593	-0.128331	4.78749	0.0140233	0.0300401	protein_coding	1	173793641	173827684	+	aspartyl-tRNA synthetase 2, mitochondrial
LPPR4	ENSG00000117600	-1.12901	0.96906	2.22655e-08	1.63523e-07	protein_coding	1	99729509	99775146	+	phospholipid phosphatase related 4
RCAN3	ENSG00000117602	-0.233964	4.29516	5.37318e-05	0.000208286	protein_coding	1	24829387	24867530	+	RCAN family member 3
SYF2	ENSG00000117614	-0.15256	5.076	0.00196952	0.00536677	protein_coding	1	25549170	25558993	-	SYF2 pre-mRNA splicing factor
C1orf63	ENSG00000117616	-0.140827	5.49666	0.00314649	0.00811456	protein_coding	1	25568728	25664704	-	arginine and serine rich protein 1
SLC35A3	ENSG00000117620	0.114848	4.78165	0.0110696	0.0244541	protein_coding	1	100435345	100492535	+	solute carrier family 35 member A3
MTFR1L	ENSG00000117640	-0.135441	5.63993	0.000669766	0.00204707	protein_coding	1	26145131	26159432	+	mitochondrial fission regulator 1 like
NEK2	ENSG00000117650	-0.123134	5.80238	0.0142388	0.030415	protein_coding	1	211836114	211848960	-	NIMA related kinase 2
RPS6KA1	ENSG00000117676	0.399371	5.73817	2.51826e-26	9.65334e-25	protein_coding	1	26856252	26901521	+	ribosomal protein S6 kinase A1
PROX1	ENSG00000117707	0.266372	4.25117	3.19358e-06	1.59341e-05	protein_coding	1	214156524	214214595	+	prospero homeobox 1
[truncated: 5,123 more rows]
