# Supplementary material for: Multiomic Profiling Identified EGF Receptor Signaling as a Potential Inhibitor of Type I Interferon Response in Models of Oncolytic Therapy by Vesicular Stomatitis Virus
Source: Int J Mol Sci. 2022 May 8;23(9):5244. doi: 10.3390/ijms23095244 (PMC9102229; doi:10.3390/ijms23095244)
Supplement: Supplementary file 1 [file ijms-23-05244-s001.zip › Table S3.xlsx]

## Sheet: Sheet1
Table S3. Label-free quantitative analysis of differential production of proteins in the proteome of DBTRG-05MG cell line after type I interferon treatment, performed by Diffacto software
	Protein	N.Pept	Q.Pept	S/N	P(PECA)	INTERFERON	CONTROL	Benjamini Hochberg FDR	log2(fold_change)	#NAME?	protein_id	gene
616	sp|P09914|IFIT1_HUMAN	16	11	-0.808469	3.14586e-80	1	0.185699	1.11898e-76	2.42896	75.9512	['P09914']	IFIT1
811	sp|P20591|MX1_HUMAN	28	9	7.123	9.52196e-63	1.00112	0.0436869	1.69348e-59	4.51826	58.7712	['P20591']	MX1
512	sp|P05161|ISG15_HUMAN	7	5	-9.84012	1.55889e-58	1	0.0398768	1.84832e-55	4.64831	54.7332	['P05161']	ISG15
1044	sp|P35579|MYH9_HUMAN	107	44	9.93959	3.35124e-57	1.29867	0.760259	2.98009e-54	0.772472	53.5258	['P35579']	MYH9
830	sp|P21333|FLNA_HUMAN	129	40	3.33598	1.31216e-47	1.20462	0.829275	9.33469e-45	0.53865	44.0299	['P21333']	FLNA
1929	sp|Q15149|PLEC_HUMAN	255	87	2.22201	4.68608e-44	0.837193	1.17113	2.77807e-41	-0.48427	40.5563	['Q15149']	PLEC
1165	sp|P46821|MAP1B_HUMAN	71	26	8.37813	4.82288e-42	1.23431	0.797219	2.45071e-39	0.630659	38.6107	['P46821']	MAP1B
96	sp|O14879|IFIT3_HUMAN	12	4	3.95475	1.45007e-41	1	0.118595	6.44737e-39	3.07588	38.1906	['O14879']	IFIT3
714	sp|P14618|KPYM_HUMAN	33	19	11.336	2.64226e-41	1.41877	0.695564	1.04428e-38	1.02839	37.9812	['P14618']	PKM
1695	sp|Q09666|AHNK_HUMAN	244	84	-0.249831	4.39746e-41	0.888737	1.12392	1.56418e-38	-0.338709	37.8057	['Q09666']	AHNAK
947	sp|P29590|PML_HUMAN	29	12	11.4684	1.65586e-39	1.34622	0.729399	5.35445e-37	0.884135	36.2713	['P29590']	PML
690	sp|P13639|EF2_HUMAN	39	14	12.3139	1.11597e-38	1.34744	0.721117	3.30793e-36	0.901918	35.4804	['P13639']	EEF2
1821	sp|Q13813|SPTN1_HUMAN	114	36	0.651262	1.56474e-36	0.348454	1.24152	4.28137e-34	-1.83307	33.3684	['Q13813']	SPTAN1
480	sp|P02786|TFR1_HUMAN	27	13	4.02356	1.53257e-34	0.771522	1.28258	3.89382e-32	-0.733268	31.4096	['P02786']	TFRC
946	sp|P29401|TKT_HUMAN	24	14	6.46068	5.53262e-34	1.34691	0.737691	1.31197e-31	0.868568	30.8821	['P29401']	TKT
3221	sp|Q9NZM1|MYOF_HUMAN	103	35	1.83917	3.8934e-31	0.818911	1.19714	8.65551e-29	-0.547812	28.0627	['Q9NZM1']	MYOF
1596	sp|Q01082|SPTB2_HUMAN	90	37	-0.937133	6.37156e-30	0.44994	1.20563	1.33316e-27	-1.42199	26.8751	['Q01082']	SPTBN1
949	sp|P29728|OAS2_HUMAN	8	4	-10.8142	2.50022e-28	1	0.128051	4.94071e-26	2.96521	25.3062	['P29728']	OAS2
812	sp|P20592|MX2_HUMAN	27	11	-8.65718	1.31468e-27	0.407732	0.0420705	2.46122e-25	3.27674	24.6088	['P20592']	MX2
845	sp|P22314|UBA1_HUMAN	32	13	9.96892	1.49548e-27	1.28053	0.398233	2.65972e-25	1.68506	24.5752	['P22314']	UBA1
548	sp|P07237|PDIA1_HUMAN	37	11	0.395943	1.6613e-27	0.71436	1.34804	2.81393e-25	-0.916141	24.5507	['P07237']	P4HB
461	sp|P00973|OAS1_HUMAN	12	4	3.18204	8.33343e-27	1	0.143978	1.34736e-24	2.79608	23.8705	['P00973']	OAS1
2350	sp|Q8IXQ6|PARP9_HUMAN	4	2	-34.4905	1.55208e-26	1	0.011052	2.40033e-24	6.49955	23.6197	['Q8IXQ6']	PARP9
940	sp|P28838|AMPL_HUMAN	18	10	-0.143497	1.29571e-25	1.37672	0.225023	1.92035e-23	2.61309	22.7166	['P28838']	LAP3
576	sp|P08238|HS90B_HUMAN	32	12	6.45517	1.79119e-25	1.33199	0.742344	2.5485e-23	0.843419	22.5937	['P08238']	HSP90AB1
2817	sp|Q9BQE3|TBA1C_HUMAN	20	11	8.93941	2.06898e-25	1.29344	0.759908	2.83053e-23	0.767312	22.5481	['Q9BQE3']	TUBA1C
615	sp|P09913|IFIT2_HUMAN	3	3	#NAME?	6.76019e-25	0.929072	0.235451	8.90592e-23	1.98037	22.0503	['P09913']	IFIT2
587	sp|P08670|VIME_HUMAN	48	11	11.5176	1.07153e-24	0.665495	1.49279	1.36123e-22	-1.16552	21.8661	['P08670']	VIM
673	sp|P12111|CO6A3_HUMAN	99	28	3.28796	1.59969e-24	1.22534	0.81663	1.9621e-22	0.585426	21.7073	['P12111']	COL6A3
457	sp|P00558|PGK1_HUMAN	23	13	9.83227	1.8469e-23	1.31313	0.754113	2.18981e-21	0.800155	20.6596	['P00558']	PGK1
1343	sp|P55072|TERA_HUMAN	49	15	-3.91231	1.51179e-22	1.20849	0.824053	1.73466e-20	0.552396	19.7608	['P55072']	VCP
487	sp|P04075|ALDOA_HUMAN	24	12	7.68626	1.62585e-22	1.31735	0.742583	1.80723e-20	0.827017	19.743	['P04075']	ALDOA
146	sp|O15427|MOT4_HUMAN	6	3	#NAME?	1.35382e-21	0.276157	1.02249	1.45925e-19	-1.88853	18.8359	['O15427']	SLC16A3
538	sp|P06756|ITAV_HUMAN	29	19	0.169856	1.72791e-21	0.383585	1.19067	1.8077e-19	-1.63415	18.7429	['P06756']	ITGAV
1452	sp|P62241|RS8_HUMAN	9	6	8.31955	2.58971e-21	1.27688	0.774649	2.56194e-19	0.721008	18.5914	['P62241']	RPS8
197	sp|O43707|ACTN4_HUMAN	58	16	0.258767	2.59291e-21	0.733462	1.35154	2.56194e-19	-0.881806	18.5914	['O43707']	ACTN4
521	sp|P05556|ITB1_HUMAN	26	11	1.59155	9.5545e-21	0.804892	1.21961	9.18523e-19	-0.599549	18.0369	['P05556']	ITGB1
3482	sp|Q9Y3Z3|SAMH1_HUMAN	24	12	-2.72943	1.638e-20	0.518152	0.0813751	1.53325e-18	2.67072	17.8144	['Q9Y3Z3']	SAMHD1
680	sp|P12814|ACTN1_HUMAN	53	15	-3.07836	5.92349e-20	0.72756	1.36483	5.40253e-18	-0.907581	17.2674	['P12814']	ACTN1
1666	sp|Q07000|1C15_HUMAN	11	7	14.9708	6.68066e-20	1.44313	0.698013	5.94078e-18	1.04788	17.2262	['Q07000']	HLA-C
470	sp|P01891|1A68_HUMAN	14	6	14.2528	9.64418e-20	1.3547	0.730156	8.36692e-18	0.891695	17.0774	['P01891']	HLA-A
650	sp|P11216|PYGB_HUMAN	34	16	2.82214	2.31293e-19	1.32748	0.747683	1.94741e-17	0.828188	16.7105	['P11216']	PYGB
496	sp|P04406|G3P_HUMAN	16	11	5.58006	2.35419e-19	1.35625	0.727869	1.94741e-17	0.897871	16.7105	['P04406']	GAPDH
2221	sp|Q71U36|TBA1A_HUMAN	20	11	8.78357	2.66695e-19	1.29847	0.767063	2.15599e-17	0.759397	16.6664	['Q71U36']	TUBA1A
115	sp|O15118|NPC1_HUMAN	6	3	-12.6137	4.1483e-19	0.311843	1.07	3.279e-17	-1.77871	16.4843	['O15118']	NPC1
862	sp|P23396|RS3_HUMAN	16	7	5.06533	7.65408e-19	1.19312	0.823902	5.9186e-17	0.534196	16.2278	['P23396']	RPS3
285	sp|O75369|FLNB_HUMAN	101	32	-6.56496	1.32656e-18	1.17284	0.845291	1.00395e-16	0.472487	15.9983	['O75369']	FLNB
1393	sp|P60842|IF4A1_HUMAN	18	8	12.0952	1.43622e-18	1.35636	0.709463	1.0643e-16	0.934941	15.9729	['P60842']	EIF4A1
965	sp|P30101|PDIA3_HUMAN	32	23	-8.52575	8.14077e-18	0.966211	0.224335	5.90953e-16	2.10668	15.2284	['P30101']	PDIA3
1088	sp|P38919|IF4A3_HUMAN	19	8	#NAME?	1.07709e-17	0.147626	0.945608	7.66243e-16	-2.6793	15.1156	['P38919']	EIF4A3
715	sp|P14625|ENPL_HUMAN	46	17	3.25585	1.48845e-17	0.738695	1.34174	1.03812e-15	-0.861059	14.9838	['P14625']	HSP90B1
3200	sp|Q9NY65|TBA8_HUMAN	9	7	7.99141	2.04872e-17	1.27671	0.778712	1.40141e-15	0.713264	14.8534	['Q9NY65']	TUBA8
741	sp|P16144|ITB4_HUMAN	38	16	4.19575	2.98199e-17	0.33908	1.26836	2.00131e-15	-1.90327	14.6987	['P16144']	ITGB4
1094	sp|P39748|FEN1_HUMAN	9	4	1.59943	3.60031e-17	1.34946	0.71438	2.37154e-15	0.917615	14.625	['P39748']	FEN1
462	sp|P01023|A2MG_HUMAN	5	3	5.90782	3.69758e-17	0.338398	1.38793	2.39132e-15	-2.03614	14.6214	['P01023']	A2M
742	sp|P16152|CBR1_HUMAN	10	5	3.97259	7.54439e-17	1.44197	0.66439	4.79204e-15	1.11794	14.3195	['P16152']	CBR1
1283	sp|P52272|HNRPM_HUMAN	33	11	-0.863478	9.46975e-17	0.739108	1.32114	5.90946e-15	-0.837927	14.2285	['P52272']	HNRNPM
788	sp|P18669|PGAM1_HUMAN	10	7	9.87836	1.19105e-16	1.46199	0.658591	7.30442e-15	1.15048	14.1364	['P18669']	PGAM1
1126	sp|P42704|LPPRC_HUMAN	66	24	-2.01207	3.2341e-16	0.295943	1.18775	1.94978e-14	-2.00484	13.71	['P42704']	LRPPRC
1386	sp|P60174|TPIS_HUMAN	14	7	2.6484	3.56187e-16	1.40458	0.698919	2.1116e-14	1.00694	13.6754	['P60174']	TPI1
543	sp|P07195|LDHB_HUMAN	14	8	10.3447	3.64042e-16	1.29609	0.767329	2.12278e-14	0.756251	13.6731	['P07195']	LDHB
2477	sp|Q8TCS8|PNPT1_HUMAN	21	9	10.3118	3.71976e-16	1.40072	0.350174	2.13406e-14	2.00002	13.6708	['Q8TCS8']	PNPT1
1851	sp|Q14195|DPYL3_HUMAN	25	12	6.98752	7.07605e-16	1.239	0.796193	3.99516e-14	0.637987	13.3985	['Q14195']	DPYSL3
1686	sp|Q08380|LG3BP_HUMAN	17	7	1.56801	8.1398e-16	1.35958	0.723269	4.52395e-14	0.910552	13.3445	['Q08380']	LGALS3BP
2081	sp|Q5JRX3|PREP_HUMAN	30	9	0.613271	9.27793e-16	0.812431	1.20416	5.07717e-14	-0.567709	13.2944	['Q5JRX3']	PITRM1
1661	sp|Q06323|PSME1_HUMAN	8	6	6.121	1.01025e-15	1.20881	0.318004	5.44461e-14	1.92647	13.264	['Q06323']	PSME1
475	sp|P02545|LMNA_HUMAN	46	14	-0.0930828	1.04704e-15	0.812934	1.22661	5.55869e-14	-0.593463	13.255	['P02545']	LMNA
495	sp|P04264|K2C1_HUMAN	13	6	7.46402	1.2302e-15	0.175789	1.34006	6.43505e-14	-2.93038	13.1914	['P04264']	KRT1
659	sp|P11413|G6PD_HUMAN	20	11	7.32793	1.81155e-15	1.29633	0.756365	9.33868e-14	0.777273	13.0297	['P11413']	G6PD
1636	sp|Q03518|TAP1_HUMAN	11	8	1.28988	2.16345e-15	1.3602	0.394188	1.09934e-13	1.78686	12.9589	['Q03518']	TAP1
1087	sp|P38646|GRP75_HUMAN	39	14	3.25781	2.24213e-15	0.795521	1.25626	1.12328e-13	-0.659164	12.9495	['P38646']	HSPA9
102	sp|O14950|ML12B_HUMAN;sp|P19105|ML12A_HUMAN	9	3	-6.83494	2.39512e-15	1.26914	0.788643	1.18325e-13	0.686403	12.9269	['O14950', 'P19105']	MYL12B
3278	sp|Q9UBT2|SAE2_HUMAN	8	5	8.8891	2.76741e-15	1.17711	0.370758	1.34845e-13	1.6667	12.8702	['Q9UBT2']	UBA2
1530	sp|P68104|EF1A1_HUMAN	19	9	4.54873	3.09741e-15	1.26508	0.78381	1.48885e-13	0.69065	12.8271	['P68104']	EEF1A1
817	sp|P20700|LMNB1_HUMAN	33	16	-0.728144	3.22644e-15	0.821284	1.20899	1.53019e-13	-0.557854	12.8153	['P20700']	LMNB1
1392	sp|P60709|ACTB_HUMAN	24	11	-0.689558	3.28288e-15	0.750274	1.33596	1.53647e-13	-0.832385	12.8135	['P60709']	ACTB
703	sp|P13929|ENOB_HUMAN	6	3	14.2523	4.42928e-15	1.38319	0.722964	2.0461e-13	0.936008	12.6891	['P13929']	ENO3
1613	sp|Q02218|ODO1_HUMAN	39	17	-20.1712	5.44886e-15	1.10194	0.33828	2.48482e-13	1.70375	12.6047	['Q02218']	OGDH
1855	sp|Q14240|IF4A2_HUMAN	13	7	2.19684	6.74499e-15	1.34843	0.708501	3.02606e-13	0.92844	12.5191	['Q14240']	EIF4A2
1714	sp|Q12805|FBLN3_HUMAN	11	6	4.98129	6.80587e-15	0.760633	1.28391	3.02606e-13	-0.755274	12.5191	['Q12805']	EFEMP1
1522	sp|P63261|ACTG_HUMAN	23	11	-0.707837	1.2203e-14	0.746942	1.34113	5.35878e-13	-0.844385	12.2709	['P63261']	ACTG1
526	sp|P06396|GELS_HUMAN	12	10	3.94271	1.67963e-14	1.20999	0.366847	7.28593e-13	1.72174	12.1375	['P06396']	GSN
1106	sp|P40939|ECHA_HUMAN	29	12	-6.9997	1.75443e-14	0.375732	1.1475	7.51868e-13	-1.61072	12.1239	['P40939']	HADHA
1045	sp|P35580|MYH10_HUMAN	33	12	1.72316	2.0401e-14	1.23172	0.813	8.63883e-13	0.599345	12.0635	['P35580']	MYH10
560	sp|P07900|HS90A_HUMAN	27	9	14.1618	3.25372e-14	1.31669	0.759857	1.36159e-12	0.793117	11.866	['P07900']	HSP90AA1
729	sp|P15311|EZRI_HUMAN	28	9	12.3462	3.65146e-14	1.2133	0.818924	1.51026e-12	0.567133	11.8209	['P15311']	EZR
320	sp|O75718|CRTAP_HUMAN	11	5	#NAME?	6.34698e-14	0.236044	1.31307	2.59497e-12	-2.47582	11.5859	['O75718']	CRTAP
1470	sp|P62424|RL7A_HUMAN	18	8	4.74016	8.10865e-14	1.25931	0.779189	3.27755e-12	0.692586	11.4845	['P62424']	RPL7A
264	sp|O75083|WDR1_HUMAN	24	11	0.392148	9.06909e-14	1.21482	0.332911	3.62458e-12	1.86753	11.4407	['O75083']	WDR1
2818	sp|Q9BQE5|APOL2_HUMAN	8	5	3.43629	9.39582e-14	1.70467	0.0593997	3.71344e-12	4.8429	11.4302	['Q9BQE5']	APOL2
304	sp|O75525|KHDR3_HUMAN	4	2	-1.1667	1.05955e-13	0.212831	1.02839	4.14158e-12	-2.27261	11.3828	['O75525']	KHDRBS3
471	sp|P01892|1A02_HUMAN	15	8	11.2766	1.22109e-13	1.33456	0.742502	4.7211e-12	0.845897	11.326	['P01892']	HLA-A
1310	sp|P53621|COPA_HUMAN	32	8	4.78862	1.42244e-13	1.17835	0.843195	5.39467e-12	0.482834	11.268	['P53621']	COPA
867	sp|P23528|COF1_HUMAN	12	8	7.79495	1.42564e-13	1.38449	0.687696	5.39467e-12	1.00952	11.268	['P23528']	CFL1
3403	sp|Q9UQ80|PA2G4_HUMAN	13	5	-2.90235	1.45623e-13	1.35159	0.387304	5.45242e-12	1.80312	11.2634	['Q9UQ80']	PA2G4
818	sp|P20742|PZP_HUMAN	2	2	0.94693	1.6631e-13	0.260177	1.28858	6.16214e-12	-2.30821	11.2103	['P20742']	PZP
567	sp|P07996|TSP1_HUMAN	47	21	-4.70085	2.31942e-13	0.258501	1.2228	8.43646e-12	-2.24195	11.0738	['P07996']	THBS1
214	sp|O43854|EDIL3_HUMAN	12	8	14.1419	2.32436e-13	0.376501	1.43692	8.43646e-12	-1.93225	11.0738	['O43854']	EDIL3
533	sp|P06733|ENOA_HUMAN	23	5	10.4458	2.7231e-13	1.3697	0.706213	9.78392e-12	0.955684	11.0095	['P06733']	ENO1
899	sp|P26038|MOES_HUMAN	30	11	4.25283	3.02147e-13	1.18607	0.827983	1.07474e-11	0.518511	10.9687	['P26038']	MSN
975	sp|P30504|1C04_HUMAN	7	4	5.00492	3.17964e-13	1.46675	0.681782	1.1198e-11	1.10524	10.9509	['P30504']	HLA-C
972	sp|P30475|1B39_HUMAN;sp|Q29836|1B67_HUMAN;sp|Q95365|1B38_HUMAN	9	6	15.6063	3.35993e-13	1.49127	0.623926	1.17169e-11	1.25709	10.9312	['P30475', 'Q29836', 'Q95365']	HLA-B
1457	sp|P62266|RS23_HUMAN	4	3	7.37482	3.46804e-13	1.32251	0.73358	1.19765e-11	0.850254	10.9217	['P62266']	RPS23
2390	sp|Q8N4A0|GALT4_HUMAN	2	2	#NAME?	3.76423e-13	0.432317	1.00983	1.28744e-11	-1.22395	10.8903	['Q8N4A0']	GALNT4
892	sp|P25705|ATPA_HUMAN	25	7	4.12573	4.13646e-13	0.709288	1.38565	1.40127e-11	-0.96612	10.8535	['P25705']	ATP5A1
1454	sp|P62249|RS16_HUMAN	8	5	5.68509	4.2307e-13	1.34412	0.76526	1.41968e-11	0.812638	10.8478	['P62249']	RPS16
993	sp|P31689|DNJA1_HUMAN	12	8	2.90794	4.82368e-13	1.45957	0.3506	1.60353e-11	2.05764	10.7949	['P31689']	DNAJA1
772	sp|P17858|PFKAL_HUMAN	6	3	#NAME?	5.58644e-13	1.16609	0.254303	1.8399e-11	2.19706	10.7352	['P17858']	PFKL
1528	sp|P67936|TPM4_HUMAN	17	6	1.93434	6.01633e-13	1.2086	0.829728	1.95344e-11	0.542627	10.7092	['P67936']	TPM4
1404	sp|P61020|RAB5B_HUMAN	7	5	-3.97126	6.041e-13	0.367421	1.16833	1.95344e-11	-1.66894	10.7092	['P61020']	RAB5B
880	sp|P24821|TENA_HUMAN	54	24	2.60761	6.34345e-13	1.10418	0.495802	2.03276e-11	1.15514	10.6919	['P24821']	TNC
1475	sp|P62701|RS4X_HUMAN	17	11	1.31912	6.74625e-13	1.21351	0.819965	2.14254e-11	0.565551	10.6691	['P62701']	RPS4X
1081	sp|P38159|RBMX_HUMAN	14	8	-6.13063	7.43296e-13	0.22299	1.09144	2.33974e-11	-2.29117	10.6308	['P38159']	RBMX
1079	sp|P37837|TALDO_HUMAN	12	5	6.38632	1.03689e-12	1.27156	0.784231	3.23027e-11	0.697254	10.4908	['P37837']	TALDO1
798	sp|P19367|HXK1_HUMAN	37	17	-9.13325	1.04436e-12	0.317323	1.05643	3.23027e-11	-1.73517	10.4908	['P19367']	HK1
600	sp|P09211|GSTP1_HUMAN	10	6	1.24456	1.06856e-12	1.33172	0.72566	3.2766e-11	0.875923	10.4846	['P09211']	GSTP1
46	sp|O00299|CLIC1_HUMAN	8	7	4.25876	1.27952e-12	1.33053	0.492872	3.88996e-11	1.43271	10.4101	['O00299']	CLIC1
490	sp|P04114|APOB_HUMAN	2	2	#NAME?	1.37792e-12	1.18825	0.485413	4.12359e-11	1.29156	10.3847	['P04114']	APOB
943	sp|P29317|EPHA2_HUMAN	22	7	-2.73977	1.37955e-12	0.827947	1.19019	4.12359e-11	-0.523577	10.3847	['P29317']	EPHA2
2418	sp|Q8NBJ5|GT251_HUMAN	18	8	-4.98968	1.48145e-12	0.383326	1.17152	4.39127e-11	-1.61174	10.3574	['Q8NBJ5']	COLGALT1
1120	sp|P42224|STAT1_HUMAN	17	8	-3.25152	2.11452e-12	0.511843	0.105754	6.21598e-11	2.27499	10.2065	['P42224']	STAT1
3321	sp|Q9UI42|CBPA4_HUMAN	8	6	5.37935	2.66839e-12	0.772783	1.26218	7.77988e-11	-0.707786	10.109	['Q9UI42']	CPA4
1924	sp|Q15075|EEA1_HUMAN	59	22	-3.76153	2.77497e-12	0.420875	1.1304	8.02484e-11	-1.42537	10.0956	['Q15075']	EEA1
21	sp|E9PAV3|NACAM_HUMAN	4	3	-1.57312	3.20046e-12	1.31003	0.755203	9.18066e-11	0.79467	10.0371	['E9PAV3']	NACA
1682	sp|Q08211|DHX9_HUMAN	45	24	-12.6458	3.52968e-12	0.270857	1.1403	1.00441e-10	-2.07381	9.99809	['Q08211']	DHX9
2762	sp|Q96TA1|NIBL1_HUMAN	19	9	5.9834	3.84744e-12	1.17078	0.489099	1.08614e-10	1.25927	9.96412	['Q96TA1']	FAM129B
500	sp|P04843|RPN1_HUMAN	32	9	-7.78146	4.98712e-12	0.23444	1.21468	1.39679e-10	-2.37328	9.85487	['P04843']	RPN1
2660	sp|Q96E39|RMXL1_HUMAN	10	6	-5.23345	5.52764e-12	0.120031	1.11146	1.53608e-10	-3.21098	9.81359	['Q96E39']	RBMXL1
603	sp|P09429|HMGB1_HUMAN	10	5	-2.30546	5.80502e-12	1.40882	0.35103	1.60066e-10	2.00482	9.7957	['P09429']	HMGB1
783	sp|P18206|VINC_HUMAN	33	17	4.82622	6.08648e-12	1.19562	0.376772	1.66535e-10	1.666	9.77849	['P18206']	VCL
919	sp|P27694|RFA1_HUMAN	10	4	-2.62592	6.63017e-12	1.15977	0.389861	1.80027e-10	1.5728	9.74466	['P27694']	RPA1
636	sp|P10619|PPGB_HUMAN	9	5	2.94919	6.96319e-12	0.384286	1.43791	1.87637e-10	-1.90372	9.72668	['P10619']	CTSA
157	sp|O43175|SERA_HUMAN	8	5	2.60095	7.26354e-12	1.19377	0.465931	1.94259e-10	1.35734	9.71162	['O43175']	PHGDH
1511	sp|P63104|1433Z_HUMAN	13	4	-3.44877	8.78284e-12	1.25024	0.810097	2.33138e-10	0.626041	9.63239	['P63104']	YWHAZ
488	sp|P04080|CYTB_HUMAN	4	4	13.0715	8.88704e-12	1.56199	0.647901	2.34157e-10	1.26954	9.63049	['P04080']	CSTB
610	sp|P09622|DLDH_HUMAN	17	7	4.70474	9.64845e-12	0.80841	1.24845	2.5235e-10	-0.62698	9.598	['P09622']	DLD
671	sp|P12109|CO6A1_HUMAN	27	14	-0.941391	1.39396e-11	1.21872	0.349764	3.61921e-10	1.80091	9.44139	['P12109']	COL6A1
527	sp|P06400|RB_HUMAN	13	5	-13.3268	1.61124e-11	1.08755	0.340457	4.15304e-10	1.67553	9.38163	['P06400']	RB1
2914	sp|Q9BYX7|ACTBM_HUMAN	7	3	-4.90046	1.7327e-11	0.826796	1.20949	4.43396e-10	-0.548793	9.35321	['Q9BYX7']	POTEKP
1428	sp|P61619|S61A1_HUMAN	9	5	9.95238	2.00144e-11	0.893914	1.12708	5.08509e-10	-0.33438	9.2937	['P61619']	SEC61A1
645	sp|P11142|HSP7C_HUMAN	33	11	-1.93621	2.0425e-11	1.15463	0.857321	5.15261e-10	0.429524	9.28797	['P11142']	HSPA8
1002	sp|P31948|STIP1_HUMAN	19	13	1.46437	2.2296e-11	1.09283	0.392585	5.585e-10	1.47699	9.25298	['P31948']	STIP1
866	sp|P23526|SAHH_HUMAN	12	9	0.667028	2.92724e-11	1.23568	0.487692	7.28125e-10	1.34126	9.13779	['P23526']	AHCY
327	sp|O75828|CBR3_HUMAN	4	3	-1.71579	3.17844e-11	1.38251	0.481882	7.85118e-10	1.52054	9.10507	['O75828']	CBR3
3537	sp|Q9Y696|CLIC4_HUMAN	11	7	-0.266273	3.66288e-11	1.16168	0.476623	8.9445e-10	1.28529	9.04844	['Q9Y696']	CLIC4
171	sp|O43390|HNRPR_HUMAN	30	7	9.66531	3.67134e-11	0.754428	1.32106	8.9445e-10	-0.808241	9.04844	['O43390']	HNRNPR
140	sp|O15355|PPM1G_HUMAN	10	4	-4.82022	3.86673e-11	1.11648	0.351948	9.35645e-10	1.66552	9.02889	['O15355']	PPM1G
431	sp|O95831|AIFM1_HUMAN	20	11	-1.15437	4.27618e-11	0.893421	1.11246	1.02773e-09	-0.316341	8.98812	['O95831']	AIFM1
865	sp|P23497|SP100_HUMAN	14	8	-9.78157	4.35724e-11	0.578213	0.147382	1.03731e-09	1.97204	8.98409	['P23497']	SP100
1549	sp|P78417|GSTO1_HUMAN	8	6	4.4185	4.37436e-11	1.24248	0.314925	1.03731e-09	1.98014	8.98409	['P78417']	GSTO1
1027	sp|P35222|CTNB1_HUMAN	27	10	-0.122931	4.72558e-11	0.822452	1.19708	1.11317e-09	-0.541515	8.95344	['P35222']	CTNNB1
3549	sp|Q9Y6K5|OAS3_HUMAN	13	9	-4.14099	4.85293e-11	0.548077	0.204672	1.13565e-09	1.42106	8.94476	['Q9Y6K5']	OAS3
489	sp|P04083|ANXA1_HUMAN	18	11	6.52616	5.58629e-11	1.24796	0.79579	1.29835e-09	0.649109	8.88661	['P04083']	ANXA1
1634	sp|Q03252|LMNB2_HUMAN	34	15	-0.546647	5.62118e-11	0.273015	1.20595	1.29835e-09	-2.14312	8.88661	['Q03252']	LMNB2
1943	sp|Q15365|PCBP1_HUMAN	13	5	-0.709325	8.13399e-11	1.16511	0.472821	1.86662e-09	1.3011	8.72894	['Q15365']	PCBP1
26	sp|O00151|PDLI1_HUMAN	13	8	1.62681	8.86747e-11	1.18522	0.844431	2.0219e-09	0.489098	8.69424	['O00151']	PDLIM1
630	sp|P10321|1C07_HUMAN	10	5	13.5865	9.64802e-11	1.32453	0.736172	2.18586e-09	0.847362	8.66038	['P10321']	HLA-C
1819	sp|Q13740|CD166_HUMAN	16	8	1.68575	9.75241e-11	0.815898	1.20206	2.19553e-09	-0.559052	8.65846	['Q13740']	ALCAM
831	sp|P21589|5NTD_HUMAN	17	10	0.32184	1.10513e-10	1.25318	0.393483	2.47229e-09	1.67122	8.6069	['P21589']	NT5E
991	sp|P31153|METK2_HUMAN	7	5	0.849414	1.16536e-10	1.23649	0.502554	2.59075e-09	1.2989	8.58657	['P31153']	MAT2A
230	sp|O60462|NRP2_HUMAN	21	10	-0.23091	1.3225e-10	0.464218	1.15676	2.92181e-09	-1.31721	8.53435	['O60462']	NRP2
2297	sp|Q86VP6|CAND1_HUMAN	20	9	-0.287171	1.36187e-10	1.21389	0.35659	2.99022e-09	1.7673	8.5243	['Q86VP6']	CAND1
2953	sp|Q9H0D6|XRN2_HUMAN	19	6	-8.8035	1.44218e-10	0.325448	1.17428	3.14715e-09	-1.85128	8.50208	['Q9H0D6']	XRN2
2065	sp|Q58FF7|H90B3_HUMAN	15	7	11.4299	1.56525e-10	1.3565	0.723439	3.39486e-09	0.906949	8.46918	['Q58FF7']	HSP90AB3P
1665	sp|Q06830|PRDX1_HUMAN	12	7	2.83196	1.75421e-10	1.24855	0.783255	3.78165e-09	0.672695	8.42232	['Q06830']	PRDX1
735	sp|P15880|RS2_HUMAN	14	5	-2.0371	1.86352e-10	1.21982	0.797482	3.9931e-09	0.613147	8.39869	['P15880']	RPS2
691	sp|P13645|K1C10_HUMAN	14	8	-0.0120549	2.20569e-10	0.208205	0.681631	4.69799e-09	-1.71099	8.32809	['P13645']	KRT10
432	sp|O95864|FADS2_HUMAN	8	3	8.73232	2.40461e-10	0.466169	1.44393	5.09118e-09	-1.63108	8.29318	['O95864']	FADS2
1768	sp|Q13287|NMI_HUMAN	3	3	#NAME?	2.58198e-10	0.675434	0.315979	5.43437e-09	1.09598	8.26485	['Q13287']	NMI
1235	sp|P50395|GDIB_HUMAN	15	6	-0.883666	3.06946e-10	1.34044	0.408221	6.4224e-09	1.71529	8.1923	['P50395']	GDI2
888	sp|P25398|RS12_HUMAN	7	5	-3.02673	3.14412e-10	0.670073	0.856568	6.54015e-09	-0.35425	8.18441	['P25398']	RPS12
2842	sp|Q9BTT0|AN32E_HUMAN	4	3	4.25543	3.76013e-10	1.13364	0.204105	7.77604e-09	2.47358	8.10924	['Q9BTT0']	ANP32E
819	sp|P20810|ICAL_HUMAN	19	8	1.61871	4.08358e-10	1.21694	0.445853	8.39612e-09	1.44862	8.07592	['P20810']	CAST
64	sp|O00571|DDX3X_HUMAN	26	13	-6.21911	4.42149e-10	1.19997	0.436289	9.03864e-09	1.45964	8.0439	['O00571']	DDX3X
668	sp|P12004|PCNA_HUMAN	12	5	6.95925	4.742e-10	1.27843	0.775077	9.63846e-09	0.721966	8.01599	['P12004']	PCNA
759	sp|P17174|AATC_HUMAN	12	8	5.20204	5.27982e-10	1.17756	0.381048	1.06706e-08	1.62776	7.97181	['P17174']	GOT1
2138	sp|Q6DD88|ATLA3_HUMAN	19	10	-5.28123	7.12976e-10	0.523714	1.155	1.4328e-08	-1.14104	7.84381	['Q6DD88']	ATL3
1934	sp|Q15185|TEBP_HUMAN	6	3	-3.74193	7.23214e-10	1.44026	0.702513	1.44521e-08	1.03573	7.84007	['Q15185']	PTGES3
592	sp|P08758|ANXA5_HUMAN	15	7	0.401668	8.35757e-10	1.30122	0.773495	1.66077e-08	0.750403	7.77969	['P08758']	ANXA5
955	sp|P30041|PRDX6_HUMAN	12	6	-0.195581	9.06771e-10	1.31867	0.502607	1.79188e-08	1.39159	7.74669	['P30041']	PRDX6
446	sp|P00338|LDHA_HUMAN	16	6	1.07248	9.15343e-10	1.1901	0.845386	1.79883e-08	0.493407	7.74501	['P00338']	LDHA
1309	sp|P53618|COPB_HUMAN	19	11	-3.01465	9.49757e-10	1.24956	0.240737	1.8562e-08	2.37589	7.73137	['P53618']	COPB1
1654	sp|Q05639|EF1A2_HUMAN	10	5	4.19505	1.08263e-09	1.31428	0.741966	2.10433e-08	0.824843	7.67689	['Q05639']	EEF1A2
1823	sp|Q13838|DX39B_HUMAN	17	5	-3.49643	1.11269e-09	0.661655	1.51078	2.151e-08	-1.19114	7.66736	['Q13838']	DDX39B
2286	sp|Q86UE4|LYRIC_HUMAN	17	9	6.86523	1.1493e-09	0.882461	1.12535	2.20976e-08	-0.350765	7.65566	['Q86UE4']	MTDH
1102	sp|P40925|MDHC_HUMAN	6	4	-1.29748	1.15609e-09	1.08938	0.237593	2.21086e-08	2.19694	7.65544	['P40925']	MDH1
13	sp|A6NHL2|TBAL3_HUMAN	5	3	-6.14066	1.24261e-09	1.19409	0.437865	2.36361e-08	1.44736	7.62642	['A6NHL2']	TUBAL3
1501	sp|P62937|PPIA_HUMAN	10	5	1.13393	1.37965e-09	1.26963	0.768704	2.61033e-08	0.723906	7.5833	['P62937']	PPIA
1604	sp|Q01628|IFM3_HUMAN	2	2	10.8478	1.40454e-09	1.77795	0.508132	2.64336e-08	1.80694	7.57784	['Q01628']	IFITM3
1395	sp|P60891|PRPS1_HUMAN	7	3	-2.12456	1.44465e-09	1.26263	0.338552	2.69949e-08	1.89898	7.56872	['P60891']	PRPS1
236	sp|O60568|PLOD3_HUMAN	24	8	-3.79592	1.44954e-09	0.388322	1.32593	2.69949e-08	-1.77168	7.56872	['O60568']	PLOD3
502	sp|P04899|GNAI2_HUMAN	17	8	0.107419	1.51838e-09	0.830015	1.20365	2.81296e-08	-0.536208	7.55084	['P04899']	GNAI2
1954	sp|Q15417|CNN3_HUMAN	11	7	1.84673	1.56768e-09	1.22436	0.277272	2.88924e-08	2.14265	7.53922	['Q15417']	CNN3
1925	sp|Q15084|PDIA6_HUMAN	18	6	-12.0374	1.75751e-09	1.22509	0.311451	3.2224e-08	1.97581	7.49182	['Q15084']	PDIA6
1417	sp|P61247|RS3A_HUMAN	13	3	10.2022	1.8558e-09	1.25995	0.827846	3.37156e-08	0.605932	7.47217	['P61247']	RPS3A
849	sp|P22626|ROA2_HUMAN	22	7	0.331159	1.85782e-09	0.227773	1.36	3.37156e-08	-2.57794	7.47217	['P22626']	HNRNPA2B1
837	sp|P21980|TGM2_HUMAN	24	11	5.93935	1.90396e-09	1.26139	0.801145	3.43775e-08	0.654882	7.46373	['P21980']	TGM2
3502	sp|Q9Y5B9|SP16H_HUMAN	18	6	-12.6643	2.11774e-09	1.1571	0.191084	3.80445e-08	2.59823	7.41971	['Q9Y5B9']	SUPT16H
92	sp|O14786|NRP1_HUMAN	8	2	-11.8353	2.22354e-09	0.797168	1.22689	3.97444e-08	-0.622056	7.40072	['O14786']	NRP1
2550	sp|Q92598|HS105_HUMAN	26	13	-1.01079	2.49111e-09	1.1577	0.341525	4.43044e-08	1.7612	7.35355	['Q92598']	HSPH1
1693	sp|Q09161|NCBP1_HUMAN	17	6	-8.84071	2.66519e-09	1.23783	0.418492	4.71646e-08	1.56454	7.32638	['Q09161']	NCBP1
504	sp|P05023|AT1A1_HUMAN	43	18	-8.75714	2.82895e-09	0.287026	1.17171	4.98147e-08	-2.02936	7.30264	['P05023']	ATP1A1
510	sp|P05121|PAI1_HUMAN	5	2	-5.55864	2.84768e-09	0.789072	1.33188	4.98976e-08	-0.755232	7.30192	['P05121']	SERPINE1
372	sp|O94925|GLSK_HUMAN	17	5	7.08917	3.15209e-09	0.823117	1.20809	5.49607e-08	-0.553554	7.25995	['O94925']	GLS
1689	sp|Q08722|CD47_HUMAN	3	2	-4.16817	3.21358e-09	1.23031	0.822939	5.57596e-08	0.580167	7.25368	['Q08722']	CD47
2007	sp|Q16666|IF16_HUMAN	19	9	-7.63146	3.40016e-09	0.525063	0.141564	5.87105e-08	1.89104	7.23128	['Q16666']	IFI16
621	sp|P0CG38|POTEI_HUMAN	10	5	-4.25384	3.42058e-09	0.746825	1.39979	5.87778e-08	-0.906363	7.23079	['P0CG38']	POTEI
427	sp|O95793|STAU1_HUMAN	15	5	-18.521	3.70747e-09	1.14527	0.454168	6.34012e-08	1.33439	7.1979	['O95793']	STAU1
3493	sp|Q9Y4L1|HYOU1_HUMAN	45	15	-11.0122	3.93059e-09	0.394645	1.19013	6.68952e-08	-1.5925	7.17461	['Q9Y4L1']	HYOU1
698	sp|P13797|PLST_HUMAN	25	10	3.53593	3.97497e-09	1.20539	0.830484	6.73284e-08	0.537471	7.1718	['P13797']	PLS3
651	sp|P11217|PYGM_HUMAN	7	6	2.41987	4.0491e-09	1.34885	0.459995	6.82591e-08	1.55204	7.16584	['P11217']	PYGM
1364	sp|P56381|ATP5E_HUMAN;sp|Q5VTU8|AT5EL_HUMAN	2	2	#NAME?	4.46282e-09	0.247723	1.19641	7.48785e-08	-2.27192	7.12564	['P56381', 'Q5VTU8']	ATP5E
1491	sp|P62873|GBB1_HUMAN	11	6	-4.57221	4.51732e-09	0.327967	1.52528	7.54372e-08	-2.21745	7.12241	['P62873']	GNB1
973	sp|P30486|1B48_HUMAN;sp|Q31610|1B81_HUMAN	6	4	13.3934	4.92696e-09	1.50452	0.630757	8.18934e-08	1.25414	7.08675	['P30486', 'Q31610']	HLA-B
2628	sp|Q96AY3|FKB10_HUMAN	22	7	-4.94247	5.30979e-09	0.282112	1.1397	8.78462e-08	-2.01432	7.05628	['Q96AY3']	FKBP10
1090	sp|P39023|RL3_HUMAN	19	7	-3.32572	5.53542e-09	1.18436	0.840924	9.1155e-08	0.494057	7.04022	['P39023']	RPL3
2154	sp|Q6NUK1|SCMC1_HUMAN	12	5	0.194616	7.02243e-09	0.387587	1.28778	1.1511e-07	-1.73229	6.93889	['Q6NUK1']	SLC25A24
2202	sp|Q6YHK3|CD109_HUMAN	18	6	-2.92201	7.18546e-09	0.869109	1.13912	1.17242e-07	-0.390313	6.93092	['Q6YHK3']	CD109
2876	sp|Q9BW19|KIFC1_HUMAN	6	3	#NAME?	7.41964e-09	0.696512	0.290797	1.2051e-07	1.26013	6.91898	['Q9BW19']	KIFC1
280	sp|O75348|VATG1_HUMAN	2	2	#NAME?	8.20921e-09	0.333221	1.13761	1.32728e-07	-1.77146	6.87704	['O75348']	ATP6V1G1
1727	sp|Q12907|LMAN2_HUMAN	11	3	-10.0056	8.484e-09	0.294926	1.66286	1.3655e-07	-2.49524	6.86471	['Q12907']	LMAN2
2256	sp|Q7Z406|MYH14_HUMAN	9	5	-5.56725	9.70211e-09	1.18647	0.849149	1.55452e-07	0.482583	6.8084	['Q7Z406']	MYH14
693	sp|P13667|PDIA4_HUMAN	39	14	-3.49017	1.01594e-08	0.893017	1.11046	1.6205e-07	-0.314397	6.79035	['P13667']	PDIA4
774	sp|P17931|LEG3_HUMAN	7	4	-2.93006	1.13426e-08	1.34589	0.373545	1.80115e-07	1.84921	6.74445	['P17931']	LGALS3
417	sp|O95573|ACSL3_HUMAN	19	8	3.054	1.24802e-08	0.844779	1.1869	1.97283e-07	-0.490553	6.70491	['O95573']	ACSL3
622	sp|P0CG39|POTEJ_HUMAN	9	4	-4.25107	1.25347e-08	0.737253	1.40838	1.97283e-07	-0.933808	6.70491	['P0CG39']	POTEJ
3154	sp|Q9NV96|CC50A_HUMAN	7	3	-10.5968	1.27652e-08	0.54924	1.25395	2.00026e-07	-1.19097	6.69891	['Q9NV96']	TMEM30A
771	sp|P17844|DDX5_HUMAN	29	9	-4.09791	1.35867e-08	0.300568	1.23463	2.11965e-07	-2.03832	6.67374	['P17844']	DDX5
2063	sp|Q58FF3|ENPLL_HUMAN	10	6	-1.94217	1.38542e-08	0.792985	1.2574	2.14608e-07	-0.665077	6.66835	['Q58FF3']	HSP90B2P
1594	sp|Q00839|HNRPU_HUMAN	28	9	-9.40759	1.38768e-08	1.15489	0.862075	2.14608e-07	0.421873	6.66835	['Q00839']	HNRNPU
237	sp|O60610|DIAP1_HUMAN	4	2	-1.62898	1.49525e-08	1.04814	0.3361	2.30242e-07	1.64086	6.63782	['O60610']	DIAPH1
962	sp|P30084|ECHM_HUMAN	13	4	5.19031	1.54558e-08	0.725425	1.29111	2.36967e-07	-0.831717	6.62531	['P30084']	ECHS1
2911	sp|Q9BYN8|RT26_HUMAN	3	2	#NAME?	1.58519e-08	0.988704	0.326651	2.41997e-07	1.59779	6.61619	['Q9BYN8']	MRPS26
739	sp|P16070|CD44_HUMAN	11	5	-3.04176	1.74046e-08	0.718298	1.41207	2.64565e-07	-0.975154	6.57747	['P16070']	CD44
1667	sp|Q07002|CDK18_HUMAN	2	2	-6.35199	1.79821e-08	0.415683	1.1326	2.72181e-07	-1.44608	6.56514	['Q07002']	CDK18
1508	sp|P63010|AP2B1_HUMAN	29	11	-96.9035	1.90349e-08	0.320581	1.23643	2.86895e-07	-1.94741	6.54228	['P63010']	AP2B1
776	sp|P17987|TCPA_HUMAN	21	15	-13.7177	2.07778e-08	0.52209	0.996762	3.11842e-07	-0.932951	6.50607	['P17987']	TCP1
1056	sp|P35749|MYH11_HUMAN	16	6	-5.07613	2.19538e-08	1.20239	0.820838	3.28109e-07	0.550731	6.48398	['P35749']	MYH11
1115	sp|P41567|EIF1_HUMAN	4	3	1.68885	2.21948e-08	1.18796	0.383493	3.30322e-07	1.63121	6.48106	['P41567']	EIF1
2619	sp|Q96A33|CCD47_HUMAN	15	8	-0.147712	2.28271e-08	0.327953	1.16788	3.38317e-07	-1.83234	6.47068	['Q96A33']	CCDC47
597	sp|P09104|ENOG_HUMAN	9	4	12.3692	2.34341e-08	1.32552	0.754808	3.45872e-07	0.81238	6.46109	['P09104']	ENO2
455	sp|P00505|AATM_HUMAN	24	8	0.407605	2.37038e-08	0.729971	1.34631	3.48407e-07	-0.883104	6.45791	['P00505']	GOT2
1068	sp|P36776|LONM_HUMAN	25	7	-5.17263	2.38232e-08	0.863713	1.14541	3.48721e-07	-0.407237	6.45752	['P36776']	LONP1
3098	sp|Q9NQW6|ANLN_HUMAN	12	6	-1.41669	2.39256e-08	1.19334	0.180813	3.48785e-07	2.72243	6.45744	['Q9NQW6']	ANLN
782	sp|P18124|RL7_HUMAN	16	6	8.68233	2.42176e-08	1.17762	0.842367	3.516e-07	0.483351	6.45395	['P18124']	RPL7
911	sp|P26641|EF1G_HUMAN	19	8	2.0269	2.47442e-08	1.2457	0.781254	3.56492e-07	0.67309	6.44795	['P26641']	EEF1G
3476	sp|Q9Y3I0|RTCB_HUMAN	19	11	-4.00607	2.4755e-08	1.12332	0.396839	3.56492e-07	1.50114	6.44795	['Q9Y3I0']	RTCB
367	sp|O94905|ERLN2_HUMAN	9	7	2.538	2.52028e-08	0.823434	1.19093	3.59094e-07	-0.532359	6.44479	['O94905']	ERLIN2
593	sp|P08865|RSSA_HUMAN	10	5	1.2135	2.52157e-08	1.1847	0.844094	3.59094e-07	0.489048	6.44479	['P08865']	RPSA
1766	sp|Q13263|TIF1B_HUMAN	27	22	#NAME?	2.52386e-08	0.96286	0.469202	3.59094e-07	1.03712	6.44479	['Q13263']	TRIM28
6	sp|A5A3E0|POTEF_HUMAN	10	5	-13.5817	2.66805e-08	0.727755	1.40951	3.78098e-07	-0.953665	6.4224	['A5A3E0']	POTEF
792	sp|P18859|ATP5J_HUMAN	5	5	4.25424	3.08544e-08	0.335968	1.34714	4.35513e-07	-2.00351	6.361	['P18859']	ATP5J
130	sp|O15230|LAMA5_HUMAN	50	27	-9.66221	3.3521e-08	0.330124	0.566698	4.71282e-07	-0.779572	6.32672	['O15230']	LAMA5
1312	sp|P53675|CLH2_HUMAN	17	7	-3.99191	3.60227e-08	1.18816	0.41314	5.04459e-07	1.52403	6.29717	['P53675']	CLTCL1
2867	sp|Q9BVC6|TM109_HUMAN	4	3	#NAME?	4.50186e-08	0.519117	1.06651	6.27965e-07	-1.03876	6.20206	['Q9BVC6']	TMEM109
1204	sp|P49406|RM19_HUMAN	6	2	-14.708	4.64298e-08	0.391956	1.14469	6.4512e-07	-1.5462	6.19036	['P49406']	MRPL19
3037	sp|Q9H9S3|S61A2_HUMAN	4	3	-2.1137	4.76469e-08	0.87569	1.1474	6.59455e-07	-0.389878	6.18081	['Q9H9S3']	SEC61A2
27	sp|O00154|BACH_HUMAN	13	5	-8.77606	5.08046e-08	1.09131	0.565421	6.98221e-07	0.948668	6.15601	['O00154']	ACOT7
1733	sp|Q12959|DLG1_HUMAN	17	6	-3.72551	5.08404e-08	0.825409	1.20672	6.98221e-07	-0.547906	6.15601	['Q12959']	DLG1
2783	sp|Q99613|EIF3C_HUMAN	13	5	-6.03994	5.15208e-08	1.14935	0.861327	7.04844e-07	0.416182	6.15191	['Q99613']	EIF3C
227	sp|O60313|OPA1_HUMAN	36	8	-5.76915	5.41683e-08	0.824676	1.20735	7.38225e-07	-0.549947	6.13181	['O60313']	OPA1
530	sp|P06576|ATPB_HUMAN	26	8	-3.95346	5.62422e-08	0.866309	1.14558	7.63563e-07	-0.40312	6.11716	['P06576']	ATP5B
784	sp|P18463|1B37_HUMAN	8	4	13.155	5.91686e-08	1.39409	0.690827	8.00238e-07	1.01292	6.09678	['P18463']	HLA-B
858	sp|P23284|PPIB_HUMAN	15	2	18.2466	5.98127e-08	0.531373	1.88192	8.05886e-07	-1.82441	6.09373	['P23284']	PPIB
3392	sp|Q9UNZ2|NSF1C_HUMAN	11	5	-6.65905	6.03145e-08	1.14602	0.279417	8.0958e-07	2.03614	6.09174	['Q9UNZ2']	NSFL1C
145	sp|O15400|STX7_HUMAN	7	4	1.80649	6.33926e-08	0.623169	1.11836	8.47698e-07	-0.843694	6.07176	['O15400']	STX7
1482	sp|P62820|RAB1A_HUMAN	12	3	11.4401	7.32016e-08	0.688256	1.43055	9.7156e-07	-1.05555	6.01253	['P62820']	RAB1A
2962	sp|Q9H0U4|RAB1B_HUMAN	9	3	11.6401	7.32016e-08	0.690665	1.42595	9.7156e-07	-1.04587	6.01253	['Q9H0U4']	RAB1B
834	sp|P21912|SDHB_HUMAN	12	8	-6.12157	7.46918e-08	0.348845	1.11843	9.87653e-07	-1.68081	6.0054	['P21912']	SDHB
134	sp|O15260|SURF4_HUMAN	7	3	-6.45193	7.9832e-08	0.514222	1.18728	1.05171e-06	-1.2072	5.9781	['O15260']	SURF4
1690	sp|Q08945|SSRP1_HUMAN	17	9	-7.73712	8.43968e-08	1.10237	0.406846	1.10775e-06	1.43806	5.95556	['Q08945']	SSRP1
554	sp|P07602|SAP_HUMAN	18	5	4.05834	8.72609e-08	0.786383	1.20476	1.13788e-06	-0.615439	5.9439	['P07602']	PSAP
1532	sp|P68366|TBA4A_HUMAN	18	9	6.78478	8.73321e-08	1.29411	0.765111	1.13788e-06	0.758225	5.9439	['P68366']	TUBA4A
507	sp|P05091|ALDH2_HUMAN	20	8	-5.30265	8.77027e-08	0.364677	1.21424	1.13853e-06	-1.73536	5.94365	['P05091']	ALDH2
1685	sp|Q08379|GOGA2_HUMAN	15	7	-9.80223	9.04566e-08	0.605867	1.08473	1.17001e-06	-0.840267	5.93181	['Q08379']	GOLGA2
2049	sp|Q52LJ0|FA98B_HUMAN	5	3	0.774183	9.43274e-08	1.1534	0.856396	1.21566e-06	0.429542	5.91519	['Q52LJ0']	FAM98B
633	sp|P10515|ODP2_HUMAN	18	7	-1.78539	9.89708e-08	0.856326	0.603307	1.2709e-06	0.505269	5.89589	['P10515']	DLAT
1951	sp|Q15393|SF3B3_HUMAN	28	8	-8.04861	1.06264e-07	0.497063	1.15532	1.35964e-06	-1.21679	5.86658	['Q15393']	SF3B3
78	sp|O14579|COPE_HUMAN	5	3	-4.28559	1.07135e-07	1.14918	0.523036	1.36587e-06	1.13562	5.86459	['O14579']	COPE
609	sp|P09543|CN37_HUMAN	20	12	5.9397	1.15198e-07	0.751513	0.300728	1.46343e-06	1.32134	5.83463	['P09543']	CNP
1627	sp|Q02880|TOP2B_HUMAN	25	11	-19.0623	1.17256e-07	0.588875	0.354736	1.48426e-06	0.731217	5.82849	['Q02880']	TOP2B
3216	sp|Q9NZ45|CISD1_HUMAN	5	3	-3.92729	1.21546e-07	1.32084	0.421449	1.53064e-06	1.64802	5.81513	['Q9NZ45']	CISD1
579	sp|P08559|ODPA_HUMAN	19	8	1.17007	1.2178e-07	0.88329	1.14794	1.53064e-06	-0.378087	5.81513	['P08559']	PDHA1
924	sp|P27816|MAP4_HUMAN	21	5	2.17106	1.23861e-07	1.21255	0.52932	1.54996e-06	1.19583	5.80968	['P27816']	MAP4
2774	sp|Q99497|PARK7_HUMAN	8	3	2.79781	1.24189e-07	1.25619	0.466478	1.54996e-06	1.42917	5.80968	['Q99497']	PARK7
3044	sp|Q9HAV7|GRPE1_HUMAN	10	5	-4.97528	1.26434e-07	0.357856	1.35891	1.57246e-06	-1.925	5.80342	['Q9HAV7']	GRPEL1
515	sp|P05198|IF2A_HUMAN	14	6	-1.64192	1.26973e-07	1.14361	0.470176	1.57367e-06	1.28232	5.80309	['P05198']	EIF2S1
31	sp|O00182|LEG9_HUMAN	5	4	-14.8682	1.28945e-07	0.521811	0.1332	1.59256e-06	1.96994	5.79791	['O00182']	LGALS9
3258	sp|Q9P2R7|SUCB1_HUMAN	17	8	0.331792	1.31372e-07	0.838287	1.1857	1.61693e-06	-0.500221	5.79131	['Q9P2R7']	SUCLA2
639	sp|P10768|ESTD_HUMAN	4	3	1.59907	1.32771e-07	1.2263	0.408272	1.62715e-06	1.58671	5.78857	['P10768']	ESD
1677	sp|Q07955|SRSF1_HUMAN	12	4	#NAME?	1.33118e-07	0.140034	1.14059	1.62715e-06	-3.02593	5.78857	['Q07955']	SRSF1
256	sp|O60869|EDF1_HUMAN	2	2	9.35219	1.34e-07	1.35918	0.677925	1.63233e-06	1.00354	5.78719	['O60869']	EDF1
472	sp|P01893|HLAH_HUMAN	4	3	1.95785	1.3597e-07	1.49145	0.651802	1.64539e-06	1.19421	5.78373	['P01893']	HLA-H
499	sp|P04792|HSPB1_HUMAN	9	4	3.64994	1.36444e-07	1.26559	0.77572	1.64539e-06	0.706206	5.78373	['P04792']	HSPB1
3554	sp|Q9Y6N5|SQRD_HUMAN	11	6	8.27358	1.3646e-07	1.25108	0.506261	1.64539e-06	1.30522	5.78373	['Q9Y6N5']	SQRDL
536	sp|P06748|NPM_HUMAN	13	4	-5.01283	1.41727e-07	0.722629	1.39969	1.70311e-06	-0.953778	5.76876	['P06748']	NPM1
1520	sp|P63241|IF5A1_HUMAN	6	4	7.05129	1.48376e-07	1.36115	0.473685	1.77702e-06	1.52283	5.75031	['P63241']	EIF5A
1023	sp|P34932|HSP74_HUMAN	23	7	1.8546	1.51831e-07	1.14594	0.489113	1.81107e-06	1.22829	5.74206	['P34932']	HSPA4
2162	sp|Q6NZI2|PTRF_HUMAN	14	5	0.807287	1.52238e-07	0.771251	1.30074	1.81107e-06	-0.754057	5.74206	['Q6NZI2']	PTRF
1073	sp|P36957|ODO2_HUMAN	10	4	-2.6631	1.74292e-07	0.878042	1.13518	2.06652e-06	-0.370563	5.68476	['P36957']	DLST
1918	sp|Q15046|SYK_HUMAN	10	4	-7.86359	1.87276e-07	0.604505	0.520012	2.21309e-06	0.217209	5.655	['Q15046']	KARS
2005	sp|Q16643|DREB_HUMAN	24	12	-2.68816	1.9776e-07	0.812311	1.20748	2.32925e-06	-0.571896	5.63278	['Q16643']	DBN1
675	sp|P12236|ADT3_HUMAN	16	7	1.36588	2.12589e-07	0.784518	1.27867	2.49564e-06	-0.704767	5.60282	['P12236']	SLC25A6
974	sp|P30491|1B53_HUMAN;sp|P30685|1B35_HUMAN	11	3	5.99642	2.19097e-07	1.53755	0.628815	2.55518e-06	1.28993	5.59258	['P30491', 'P30685']	HLA-B
497	sp|P04439|1A03_HUMAN	5	3	-0.105545	2.19097e-07	1.4016	0.71347	2.55518e-06	0.974149	5.59258	['P04439']	HLA-A
1107	sp|P41091|IF2G_HUMAN	14	7	-2.80271	2.24958e-07	1.23993	0.788642	2.61495e-06	0.652814	5.58254	['P41091']	EIF2S3
841	sp|P22087|FBRL_HUMAN	14	6	-8.81921	2.26229e-07	1.05333	0.948073	2.62116e-06	0.151886	5.58151	['P22087']	FBL
1164	sp|P46783|RS10_HUMAN	6	3	-5.9607	2.28944e-07	1.25783	0.406624	2.64401e-06	1.62917	5.57774	['P46783']	RPS10
2089	sp|Q5JWF2|GNAS1_HUMAN	13	6	6.47035	2.32228e-07	0.890465	1.14154	2.67326e-06	-0.358355	5.57296	['Q5JWF2']	GNAS
1148	sp|P45974|UBP5_HUMAN	8	3	-1.51964	2.33754e-07	0.953682	0.61676	2.68214e-06	0.628797	5.57152	['P45974']	USP5
3267	sp|Q9UBG0|MRC2_HUMAN	11	4	-11.1085	2.37601e-07	0.326074	1.24674	2.71751e-06	-1.93488	5.56583	['Q9UBG0']	MRC2
3325	sp|Q9UIJ7|KAD3_HUMAN	12	7	-1.44683	2.47168e-07	0.384115	1.12104	2.81788e-06	-1.54522	5.55008	['Q9UIJ7']	AK3
1055	sp|P35659|DEK_HUMAN	10	5	-0.529431	2.64915e-07	1.20405	0.428848	3.00441e-06	1.48936	5.52224	['P35659']	DEK
571	sp|P08133|ANXA6_HUMAN	30	15	8.82333	2.65219e-07	0.40608	1.04833	3.00441e-06	-1.36825	5.52224	['P08133']	ANXA6
767	sp|P17661|DESM_HUMAN	7	2	5.13375	2.81204e-07	0.633338	1.57893	3.17538e-06	-1.3179	5.4982	['P17661']	DES
141	sp|O15371|EIF3D_HUMAN	9	5	-4.19259	2.93551e-07	1.15605	0.455622	3.3043e-06	1.3433	5.48092	['O15371']	EIF3D
29	sp|O00161|SNP23_HUMAN	6	4	-3.27491	2.96733e-07	0.518066	1.15316	3.32878e-06	-1.15438	5.47771	['O00161']	SNAP23
1573	sp|P84090|ERH_HUMAN	4	2	-6.16068	2.97597e-07	0.784825	1.27417	3.32878e-06	-0.699116	5.47771	['P84090']	ERH
426	sp|O95786|DDX58_HUMAN	10	3	7.08248	3.00418e-07	0.611949	0.171263	3.34981e-06	1.8372	5.47498	['O95786']	DDX58
1431	sp|P61769|B2MG_HUMAN	4	3	1.42119	3.06563e-07	1.73483	0.576424	3.40763e-06	1.58959	5.46755	['P61769']	B2M
1190	sp|P48681|NEST_HUMAN	59	16	-5.9621	3.23705e-07	0.831996	1.18668	3.58697e-06	-0.51228	5.44527	['P48681']	NES
1232	sp|P50213|IDH3A_HUMAN	12	4	-2.11215	3.26086e-07	0.727531	1.33144	3.60214e-06	-0.871905	5.44344	['P50213']	IDH3A
42	sp|O00264|PGRC1_HUMAN	9	3	4.16279	3.58614e-07	0.37003	1.28816	3.9492e-06	-1.7996	5.40349	['O00264']	PGRMC1
2417	sp|Q8NBJ4|GOLM1_HUMAN	8	4	-4.24015	3.83412e-07	1.09945	0.442302	4.20925e-06	1.31368	5.3758	['Q8NBJ4']	GOLM1
1239	sp|P50479|PDLI4_HUMAN	12	10	-0.481304	3.8865e-07	1.16463	0.389351	4.25363e-06	1.58073	5.37124	['P50479']	PDLIM4
585	sp|P08621|RU17_HUMAN	16	5	-10.1025	4.16026e-07	0.823662	1.18898	4.53928e-06	-0.529601	5.34301	['P08621']	SNRNP70
1366	sp|P56537|IF6_HUMAN	6	2	8.76767	4.76845e-07	1.3048	0.731164	5.18696e-06	0.835563	5.28509	['P56537']	EIF6
88	sp|O14745|NHRF1_HUMAN	4	3	-8.85121	5.04343e-07	1.18823	0.332851	5.46935e-06	1.83587	5.26206	['O14745']	SLC9A3R1
1500	sp|P62917|RL8_HUMAN	7	4	3.62581	5.16733e-07	1.21588	0.791273	5.58669e-06	0.619749	5.25285	['P62917']	RPL8
1138	sp|P43307|SSRA_HUMAN	4	3	-10.0862	5.42687e-07	0.370612	1.2658	5.84951e-06	-1.77207	5.23288	['P43307']	SSR1
1484	sp|P62829|RL23_HUMAN	6	3	-9.14984	5.50749e-07	1.1832	0.428386	5.91847e-06	1.46572	5.22779	['P62829']	RPL23
1692	sp|Q09028|RBBP4_HUMAN	13	5	-4.22016	5.68581e-07	0.269847	0.67056	6.09169e-06	-1.31323	5.21526	['Q09028']	RBBP4
473	sp|P02042|HBD_HUMAN;sp|P68871|HBB_HUMAN	2	2	-6.33887	5.89324e-07	0.190732	1.16516	6.29497e-06	-2.61091	5.20101	['P02042', 'P68871']	HBD
559	sp|P07858|CATB_HUMAN	10	3	-6.64002	6.11468e-07	0.737041	1.3609	6.51196e-06	-0.884745	5.18629	['P07858']	CTSB
1419	sp|P61289|PSME3_HUMAN	9	5	-1.73274	6.2308e-07	1.17751	0.514462	6.58611e-06	1.1946	5.18137	['P61289']	PSME3
642	sp|P11021|GRP78_HUMAN	38	19	-7.55836	6.2311e-07	1.00398	0.995997	6.58611e-06	0.011522	5.18137	['P11021']	HSPA5
522	sp|P05783|K1C18_HUMAN	27	12	-0.64654	6.23986e-07	0.241093	1.25689	6.58611e-06	-2.3822	5.18137	['P05783']	KRT18
569	sp|P08107|HSP71_HUMAN	25	10	-8.53644	6.48677e-07	1.14566	0.86058	6.81365e-06	0.412796	5.16662	['P08107']	HSPA1A
996	sp|P31939|PUR9_HUMAN	3	2	-10.8204	6.49375e-07	1.03282	0.260303	6.81365e-06	1.98832	5.16662	['P31939']	ATIC
2853	sp|Q9BUF5|TBB6_HUMAN	14	7	-4.47566	6.5418e-07	1.17584	0.3376	6.84387e-06	1.8003	5.1647	['Q9BUF5']	TUBB6
2032	sp|Q2TB90|HKDC1_HUMAN	3	2	-2.0874	6.66916e-07	0.661595	1.44345	6.95666e-06	-1.12551	5.1576	['Q2TB90']	HKDC1
1231	sp|P50148|GNAQ_HUMAN	9	5	6.66498	6.8127e-07	0.430508	1.16376	7.05517e-06	-1.43468	5.15149	['P50148']	GNAQ
1795	sp|Q13509|TBB3_HUMAN	12	7	5.31393	6.81665e-07	1.22075	0.397278	7.05517e-06	1.61954	5.15149	['Q13509']	TUBB3
2006	sp|Q16658|FSCN1_HUMAN	14	5	-4.1365	6.84e-07	1.16978	0.854101	7.05517e-06	0.453756	5.15149	['Q16658']	FSCN1
1184	sp|P48449|ERG7_HUMAN	20	8	-1.42688	6.84294e-07	0.525649	0.688067	7.05517e-06	-0.38845	5.15149	['P48449']	LSS
875	sp|P24534|EF1B_HUMAN	8	6	2.40613	7.18698e-07	1.24075	0.777728	7.38846e-06	0.673874	5.13145	['P24534']	EEF1B2
619	sp|P09972|ALDOC_HUMAN	6	4	-5.14303	7.34789e-07	1.36738	0.390398	7.53212e-06	1.8084	5.12308	['P09972']	ALDOC
3283	sp|Q9UBX3|DIC_HUMAN	9	5	-10.9458	7.77963e-07	1.00116	0.998944	7.95023e-06	0.00319912	5.09962	['Q9UBX3']	SLC25A10
980	sp|P30533|AMRP_HUMAN	15	8	-0.156141	7.80048e-07	0.438695	1.14507	7.95023e-06	-1.38415	5.09962	['P30533']	LRPAP1
1345	sp|P55084|ECHB_HUMAN	17	6	-5.46972	8.52975e-07	0.880052	1.16014	8.66866e-06	-0.398641	5.06205	['P55084']	HADHB
696	sp|P13747|HLAE_HUMAN	2	2	#NAME?	8.58604e-07	1.27251	0.322684	8.70101e-06	1.97948	5.06043	['P13747']	HLA-E
25	sp|O00148|DX39A_HUMAN	16	6	-2.99506	8.75505e-07	0.70466	1.41266	8.84708e-06	-1.00342	5.0532	['O00148']	DDX39A
2699	sp|Q96I99|SUCB2_HUMAN	10	4	-4.33894	8.78526e-07	0.832605	1.20048	8.85245e-06	-0.527912	5.05294	['Q96I99']	SUCLG2
1780	sp|Q13423|NNTM_HUMAN	31	13	-3.36073	9.89896e-07	0.513225	1.07272	9.94649e-06	-1.06361	5.00233	['Q13423']	NNT
1987	sp|Q16181|SEPT7_HUMAN	11	6	2.30262	1.0054e-06	1.22176	0.815203	1.00738e-05	0.583734	4.99681	['Q16181']	2007-09-01
1603	sp|Q01518|CAP1_HUMAN	10	5	-2.5101	1.06165e-06	1.31121	0.397566	1.06075e-05	1.72163	4.97439	['Q01518']	CAP1
1591	sp|Q00610|CLH1_HUMAN	69	17	-10.4717	1.09359e-06	1.17934	0.835153	1.08961e-05	0.497864	4.96273	['Q00610']	CLTC
3534	sp|Q9Y676|RT18B_HUMAN	8	4	-5.07082	1.14856e-06	0.581014	1.16486	1.14118e-05	-1.00352	4.94265	['Q9Y676']	MRPS18B
999	sp|P31943|HNRH1_HUMAN	20	7	-3.15723	1.2242e-06	0.715667	1.41023	1.21294e-05	-0.97857	4.91616	['P31943']	HNRNPH1
1726	sp|Q12906|ILF3_HUMAN	34	11	-5.82148	1.28495e-06	0.861379	1.15734	1.2696e-05	-0.426091	4.89633	['Q12906']	ILF3
617	sp|P09936|UCHL1_HUMAN	5	4	-1.17461	1.32445e-06	1.3445	0.717703	1.305e-05	0.905609	4.88439	['P09936']	UCHL1
1456	sp|P62263|RS14_HUMAN	5	3	5.26023	1.35395e-06	1.20482	0.818677	1.33039e-05	0.557455	4.87602	['P62263']	RPS14
3379	sp|Q9UNF0|PACN2_HUMAN	6	3	-9.87068	1.37237e-06	1.26233	0.264269	1.34477e-05	2.256	4.87135	['Q9UNF0']	PACSIN2
1019	sp|P33993|MCM7_HUMAN	25	8	-1.45293	1.4007e-06	1.10595	0.371526	1.36876e-05	1.57375	4.86367	['P33993']	MCM7
544	sp|P07196|NFL_HUMAN	25	5	9.43239	1.42777e-06	0.789397	1.28847	1.39139e-05	-0.706837	4.85655	['P07196']	NEFL
1206	sp|P49419|AL7A1_HUMAN	21	3	11.0403	1.55131e-06	0.813024	1.20447	1.50766e-05	-0.567034	4.8217	['P49419']	ALDH7A1
1174	sp|P47897|SYQ_HUMAN	21	7	-18.8966	1.6574e-06	0.717616	0.368531	1.60637e-05	0.961427	4.79415	['P47897']	QARS
2427	sp|Q8NC51|PAIRB_HUMAN	14	7	3.27656	1.66216e-06	1.28521	0.38146	1.6066e-05	1.7524	4.79409	['Q8NC51']	SERBP1
206	sp|O43765|SGTA_HUMAN	5	4	3.51509	1.71898e-06	1.13774	0.477767	1.65475e-05	1.25179	4.78127	['O43765']	SGTA
1531	sp|P68133|ACTS_HUMAN	17	8	0.607676	1.72127e-06	0.736131	1.33599	1.65475e-05	-0.859873	4.78127	['P68133']	ACTA1
1483	sp|P62826|RAN_HUMAN	8	7	11.7927	1.74202e-06	1.20243	0.837631	1.67018e-05	0.521571	4.77724	['P62826']	RAN
1962	sp|Q15582|BGH3_HUMAN	19	17	-133.376	1.79173e-06	0.434358	0.451853	1.71322e-05	-0.0569686	4.76619	['Q15582']	TGFBI
614	sp|P09874|PARP1_HUMAN	24	10	-5.96791	1.83617e-06	1.16525	0.459039	1.75101e-05	1.34395	4.75671	['P09874']	PARP1
1399	sp|P60981|DEST_HUMAN	8	3	2.12993	1.89194e-06	0.637919	0.201406	1.79937e-05	1.66326	4.74488	['P60981']	DSTN
1000	sp|P31946|1433B_HUMAN	11	5	1.2428	1.94698e-06	1.22314	0.80997	1.84677e-05	0.594649	4.73359	['P31946']	YWHAB
3130	sp|Q9NSE4|SYIM_HUMAN	25	9	-10.4862	2.04355e-06	0.449283	1.11185	1.93322e-05	-1.30727	4.71372	['Q9NSE4']	IARS2
3104	sp|Q9NR28|DBLOH_HUMAN	10	5	-4.96583	2.07975e-06	0.867695	1.1556	1.96225e-05	-0.413385	4.70725	['Q9NR28']	DIABLO
1587	sp|Q00325|MPCP_HUMAN	12	3	8.50924	2.26374e-06	0.635912	1.50289	2.13019e-05	-1.24084	4.67158	['Q00325']	SLC25A3
2166	sp|Q6P1M0|S27A4_HUMAN	12	8	#NAME?	2.32463e-06	0.572296	1.02339	2.18172e-05	-0.838525	4.6612	['Q6P1M0']	SLC27A4
895	sp|P25787|PSA2_HUMAN	7	3	-1.23551	2.45858e-06	1.15852	0.853911	2.30136e-05	0.440127	4.63802	['P25787']	PSMA2
1458	sp|P62269|RS18_HUMAN	10	4	-4.77777	2.49217e-06	1.19063	0.839254	2.32194e-05	0.504548	4.63415	['P62269']	RPS18
2025	sp|Q16891|IMMT_HUMAN	35	20	-18.5213	2.49362e-06	0.330803	1.0425	2.32194e-05	-1.65601	4.63415	['Q16891']	IMMT
1301	sp|P52943|CRIP2_HUMAN	2	2	-6.50705	2.50722e-06	1.16642	0.454139	2.32851e-05	1.36088	4.63292	['P52943']	CRIP2
492	sp|P04179|SODM_HUMAN	5	4	-1.27676	2.54444e-06	0.34847	1.19626	2.35692e-05	-1.77942	4.62766	['P04179']	SOD2
2787	sp|Q99623|PHB2_HUMAN	15	5	-9.6649	2.69007e-06	0.287306	1.19082	2.48535e-05	-2.0513	4.60461	['Q99623']	PHB2
448	sp|P00367|DHE3_HUMAN	25	8	-5.701	2.90408e-06	0.363946	1.25891	2.67611e-05	-1.79038	4.5725	['P00367']	GLUD1
797	sp|P19338|NUCL_HUMAN	23	4	9.87949	2.94875e-06	0.75109	1.3328	2.71026e-05	-0.827404	4.56699	['P19338']	NCL
16	sp|A6NIZ1|RP1BL_HUMAN	8	4	-1.03704	2.96402e-06	0.863879	1.16631	2.71287e-05	-0.43305	4.56657	['A6NIZ1']	nan
1577	sp|P84157|MXRA7_HUMAN	6	4	2.41786	2.96685e-06	0.411598	1.23906	2.71287e-05	-1.58994	4.56657	['P84157']	MXRA7
3276	sp|Q9UBR2|CATZ_HUMAN	9	5	0.101014	2.98378e-06	0.840707	1.22143	2.72136e-05	-0.538891	4.56521	['Q9UBR2']	CTSZ
643	sp|P11047|LAMC1_HUMAN	37	12	-10.8058	3.06225e-06	0.37744	1.06925	2.78579e-05	-1.50229	4.55505	['P11047']	LAMC1
1376	sp|P58107|EPIPL_HUMAN	6	4	-14.1967	3.15787e-06	1.04422	0.958558	2.86258e-05	0.123493	4.54324	['P58107']	EPPK1
1937	sp|Q15286|RAB35_HUMAN	5	3	-8.8623	3.16276e-06	0.900127	1.12292	2.86258e-05	-0.319052	4.54324	['Q15286']	RAB35
2423	sp|Q8NBS9|TXND5_HUMAN	18	7	-6.1178	3.30461e-06	0.414054	1.13115	2.98337e-05	-1.4499	4.52529	['Q8NBS9']	TXNDC5
108	sp|O15020|SPTN2_HUMAN	7	6	#NAME?	3.33186e-06	0.532418	1.08354	3.00036e-05	-1.02512	4.52283	['O15020']	SPTBN2
3510	sp|Q9Y5J9|TIM8B_HUMAN	4	3	0.662862	3.35224e-06	0.81599	1.1822	3.01109e-05	-0.53485	4.52128	['Q9Y5J9']	TIMM8B
119	sp|O15143|ARC1B_HUMAN	8	4	-3.0673	3.46908e-06	1.13971	0.868539	3.10819e-05	0.391998	4.50749	['O15143']	ARPC1B
1409	sp|P61106|RAB14_HUMAN	11	5	-10.1965	3.53286e-06	1.13765	0.341144	3.15738e-05	1.73761	4.50067	['P61106']	RAB14
1218	sp|P49748|ACADV_HUMAN	27	13	#NAME?	3.55438e-06	0.481496	1.03636	3.16866e-05	-1.10593	4.49912	['P49748']	ACADVL
879	sp|P24752|THIL_HUMAN	16	8	1.71169	3.72275e-06	0.304311	1.14417	3.305e-05	-1.91068	4.48083	['P24752']	ACAT1
106	sp|O14979|HNRDL_HUMAN	9	2	4.74347	3.72591e-06	0.549682	1.61045	3.305e-05	-1.55079	4.48083	['O14979']	HNRNPDL
441	sp|O96008|TOM40_HUMAN	9	7	-7.97848	3.75045e-06	0.350284	1.1281	3.31849e-05	-1.6873	4.47906	['O96008']	TOMM40
213	sp|O43852|CALU_HUMAN	20	9	0.0254761	3.87595e-06	0.841506	1.16816	3.42103e-05	-0.473193	4.46584	['O43852']	CALU
1445	sp|P62081|RS7_HUMAN	10	4	4.41902	3.93825e-06	1.22432	0.801009	3.46741e-05	0.612093	4.45999	['P62081']	RPS7
1783	sp|Q13428|TCOF_HUMAN	20	10	-4.64302	3.99013e-06	1.12314	0.418607	3.50442e-05	1.42388	4.45538	['Q13428']	TCOF1
1162	sp|P46781|RS9_HUMAN	12	7	-6.26086	4.15947e-06	1.06632	0.9371	3.64415e-05	0.186367	4.4384	['P46781']	RPS9
1009	sp|P32969|RL9_HUMAN	10	3	-11.5089	4.20499e-06	1.3941	0.717306	3.67497e-05	0.958678	4.43475	['P32969']	RPL9
338	sp|O75934|SPF27_HUMAN	4	2	-9.57468	4.56155e-06	0.382654	1.0807	3.97682e-05	-1.49785	4.40046	['O75934']	BCAS2
87	sp|O14737|PDCD5_HUMAN	4	3	-3.68292	4.60061e-06	1.20711	0.391037	3.9848e-05	1.62618	4.39959	['O14737']	PDCD5
1476	sp|P62714|PP2AB_HUMAN	7	5	-4.2296	4.60431e-06	1.10303	0.577894	3.9848e-05	0.932598	4.39959	['P62714']	PPP2CB
1524	sp|P67775|PP2AA_HUMAN	7	5	-4.2296	4.60431e-06	1.10303	0.577894	3.9848e-05	0.932598	4.39959	['P67775']	PPP2CA
3532	sp|Q9Y666|S12A7_HUMAN	2	2	#NAME?	4.81159e-06	1.06449	0.441481	4.15408e-05	1.26974	4.38152	['Q9Y666']	SLC12A7
1032	sp|P35241|RADI_HUMAN	26	10	2.18103	5.07671e-06	1.17419	0.836172	4.37236e-05	0.489794	4.35928	['P35241']	RDX
1514	sp|P63165|SUMO1_HUMAN	2	2	0.19464	5.46082e-06	0.391246	1.25447	4.69182e-05	-1.68093	4.32866	['P63165']	SUMO1
2799	sp|Q99798|ACON_HUMAN	35	12	-3.43234	5.70469e-06	0.877131	1.12599	4.88954e-05	-0.36033	4.31073	['Q99798']	ACO2
827	sp|P21281|VATB2_HUMAN	12	6	-8.46679	5.87027e-06	0.890396	1.11487	5.01936e-05	-0.324361	4.29935	['P21281']	ATP6V1B2
694	sp|P13674|P4HA1_HUMAN	20	9	-4.8359	6.12466e-06	1.14409	0.507642	5.22088e-05	1.17231	4.28226	['P13674']	P4HA1
315	sp|O75643|U520_HUMAN	68	39	-17.6877	6.13531e-06	0.363793	0.41782	5.22088e-05	-0.199767	4.28226	['O75643']	SNRNP200
2066	sp|Q58FF8|H90B2_HUMAN	8	3	3.05409	6.34915e-06	1.2411	0.805734	5.38996e-05	0.623248	4.26841	['Q58FF8']	HSP90AB2P
1546	sp|P78371|TCPB_HUMAN	22	10	-10.5784	6.77132e-06	1.11364	0.902365	5.73466e-05	0.303504	4.24149	['P78371']	CCT2
3145	sp|Q9NUM4|T106B_HUMAN	4	2	-1.29365	6.93759e-06	0.216537	1.21654	5.86153e-05	-2.4901	4.23199	['Q9NUM4']	TMEM106B
3427	sp|Q9Y2J2|E41L3_HUMAN	3	3	-4.81205	7.14253e-06	0.38047	1.07643	6.02037e-05	-1.50041	4.22038	['Q9Y2J2']	EPB41L3
148	sp|O15460|P4HA2_HUMAN	19	9	-2.62876	7.18089e-06	0.438112	1.08116	6.02808e-05	-1.3032	4.21982	['O15460']	P4HA2
1985	sp|Q15942|ZYX_HUMAN	9	6	-13.9042	7.18557e-06	1.07623	0.393775	6.02808e-05	1.45054	4.21982	['Q15942']	ZYX
1331	sp|P54727|RD23B_HUMAN	11	4	-5.57542	7.31747e-06	1.21257	0.829944	6.1243e-05	0.546984	4.21294	['P54727']	RAD23B
288	sp|O75390|CISY_HUMAN	16	7	7.64795	7.49868e-06	0.742915	1.34284	6.26122e-05	-0.854014	4.20334	['O75390']	CS
1668	sp|Q07020|RL18_HUMAN	7	4	-0.313513	7.57993e-06	1.23851	0.812446	6.3049e-05	0.608267	4.20032	['Q07020']	RPL18
484	sp|P04040|CATA_HUMAN	16	6	-0.164254	7.58644e-06	0.866583	1.14107	6.3049e-05	-0.39698	4.20032	['P04040']	CAT
1054	sp|P35658|NU214_HUMAN	10	5	#NAME?	7.82246e-06	0.389122	0.384524	6.4859e-05	0.0171473	4.18803	['P35658']	NUP214
1621	sp|Q02543|RL18A_HUMAN	8	5	-0.466276	7.90535e-06	1.21146	0.819716	6.53938e-05	0.563552	4.18446	['Q02543']	RPL18A
852	sp|P22695|QCR2_HUMAN	15	8	-6.79716	7.9974e-06	0.823187	1.21828	6.60017e-05	-0.565548	4.18044	['P22695']	UQCRC2
964	sp|P30086|PEBP1_HUMAN	8	5	5.16271	8.35174e-06	1.35324	0.40763	6.87666e-05	1.73108	4.16262	['P30086']	PEBP1
1280	sp|P51970|NDUA8_HUMAN	5	4	-2.53584	8.48981e-06	0.35467	1.12454	6.97419e-05	-1.66478	4.15651	['P51970']	NDUFA8
1092	sp|P39656|OST48_HUMAN	13	9	#NAME?	8.6277e-06	1.0638	0.936043	7.07114e-05	0.184577	4.15051	['P39656']	DDOST
328	sp|O75832|PSD10_HUMAN	2	2	#NAME?	8.75875e-06	1.1365	0.382954	7.16204e-05	1.56935	4.14496	['O75832']	PSMD10
809	sp|P20339|RAB5A_HUMAN	6	5	-9.61708	8.81706e-06	0.587069	0.809852	7.19318e-05	-0.464128	4.14308	['P20339']	RAB5A
591	sp|P08754|GNAI3_HUMAN	10	4	-6.30487	8.85789e-06	0.807602	1.22411	7.20995e-05	-0.600018	4.14207	['P08754']	GNAI3
1213	sp|P49591|SYSC_HUMAN	8	4	-3.5486	9.42745e-06	1.24376	0.356573	7.65604e-05	1.80243	4.116	['P49591']	SARS
765	sp|P17612|KAPCA_HUMAN	8	4	#NAME?	9.53756e-06	1.14296	0.392613	7.72782e-05	1.54159	4.11194	['P17612']	PRKACA
550	sp|P07339|CATD_HUMAN	16	7	-0.0237767	9.57822e-06	0.88265	1.13295	7.74312e-05	-0.360173	4.11108	['P07339']	CTSD
3071	sp|Q9HDC9|APMAP_HUMAN	16	8	-4.87565	9.86943e-06	0.319934	1.20185	7.96044e-05	-1.90941	4.09906	['Q9HDC9']	APMAP
2064	sp|Q58FF6|H90B4_HUMAN	5	3	8.25381	1.01046e-05	1.39322	0.717563	8.10742e-05	0.957247	4.09112	['Q58FF6']	HSP90AB4P
2067	sp|Q58FG0|HS905_HUMAN	7	3	6.9844	1.01046e-05	1.19185	0.843944	8.10742e-05	0.497984	4.09112	['Q58FG0']	HSP90AA5P
646	sp|P11166|GTR1_HUMAN	7	5	-6.59877	1.012e-05	0.410867	1.19249	8.10742e-05	-1.53723	4.09112	['P11166']	SLC2A1
1321	sp|P54136|SYRC_HUMAN	16	8	-16.2232	1.02797e-05	1.12305	0.880559	8.21686e-05	0.350929	4.08529	['P54136']	RARS
2644	sp|Q96CS3|FAF2_HUMAN	11	5	-4.01572	1.0324e-05	0.451083	0.857435	8.2337e-05	-0.926636	4.08441	['Q96CS3']	FAF2
2624	sp|Q96AE4|FUBP1_HUMAN	16	7	-11.662	1.07078e-05	1.1091	0.252691	8.51515e-05	2.13395	4.06981	['Q96AE4']	FUBP1
1396	sp|P60900|PSA6_HUMAN	11	8	#NAME?	1.07247e-05	0.536809	1.01471	8.51515e-05	-0.918583	4.06981	['P60900']	PSMA6
2768	sp|Q99439|CNN2_HUMAN	7	5	-0.880811	1.13108e-05	1.18064	0.481553	8.96049e-05	1.29381	4.04767	['Q99439']	CNN2
1240	sp|P50502|F10A1_HUMAN	7	5	2.96551	1.13746e-05	0.607933	0.838206	8.99098e-05	-0.463393	4.04619	['P50502']	ST13
3449	sp|Q9Y305|ACOT9_HUMAN	17	8	-7.30237	1.15094e-05	0.590985	1.10984	9.07737e-05	-0.909162	4.04204	['Q9Y305']	ACOT9
913	sp|P27105|STOM_HUMAN	8	4	-9.06681	1.21705e-05	1.09991	0.380232	9.57754e-05	1.53243	4.01875	['P27105']	STOM
233	sp|O60506|HNRPQ_HUMAN	21	5	-6.86362	1.31605e-05	0.842395	1.19668	0.000103338	-0.506472	3.98574	['O60506']	SYNCRIP
535	sp|P06744|G6PI_HUMAN	18	17	5.98413	1.32146e-05	0.738617	0.493353	0.000103534	0.582205	3.98492	['P06744']	GPI
2542	sp|Q92522|H1X_HUMAN	5	4	-10.7533	1.33371e-05	1.08422	0.646906	0.000104264	0.745032	3.98187	['Q92522']	H1FX
704	sp|P13984|T2FB_HUMAN	5	2	#NAME?	1.35412e-05	1.25422	0.275128	0.000105627	2.18862	3.97623	['P13984']	GTF2F2
2129	sp|Q63HN8|RN213_HUMAN	25	12	-2.80108	1.37392e-05	0.353578	0.157843	0.000106937	1.16354	3.97087	['Q63HN8']	RNF213
1623	sp|Q02790|FKBP4_HUMAN	16	12	-5.40287	1.39238e-05	0.655075	0.307076	0.000108138	1.09306	3.96602	['Q02790']	FKBP4
2770	sp|Q99459|CDC5L_HUMAN	12	4	#NAME?	1.40675e-05	1.16238	0.874907	0.000109015	0.40988	3.96251	['Q99459']	CDC5L
2319	sp|Q8IV08|PLD3_HUMAN	7	4	1.01641	1.45029e-05	0.569798	1.19281	0.000112145	-1.06584	3.95022	['Q8IV08']	PLD3
3372	sp|Q9UMS4|PRP19_HUMAN	13	10	-6.89296	1.45722e-05	1.02024	0.504437	0.000112437	1.01617	3.94909	['Q9UMS4']	PRPF19
173	sp|O43396|TXNL1_HUMAN	5	2	#NAME?	1.48805e-05	1.17025	0.85452	0.000114567	0.453628	3.94094	['O43396']	TXNL1
2376	sp|Q8N163|CCAR2_HUMAN	19	12	-20.0859	1.49781e-05	1.05529	0.542846	0.000115069	0.959028	3.93904	['Q8N163']	CCAR2
1287	sp|P52565|GDIR1_HUMAN	4	2	5.31064	1.56992e-05	1.50036	0.583726	0.000120349	1.36194	3.91956	['P52565']	ARHGDIA
1879	sp|Q14651|PLSI_HUMAN	5	2	4.5737	1.61841e-05	1.24095	0.814526	0.0001238	0.607409	3.90728	['Q14651']	PLS1
298	sp|O75477|ERLN1_HUMAN	9	4	-5.20119	1.65156e-05	0.782584	1.29248	0.000125914	-0.723822	3.89993	['O75477']	ERLIN1
2400	sp|Q8N5K1|CISD2_HUMAN	8	5	-2.51707	1.65312e-05	1.22273	0.513139	0.000125914	1.25268	3.89993	['Q8N5K1']	CISD2
927	sp|P28065|PSB9_HUMAN	3	3	#NAME?	1.68742e-05	0.552551	0.185035	0.000128251	1.57831	3.89194	['P28065']	PSMB9
1626	sp|Q02878|RL6_HUMAN	15	8	-0.969253	1.69183e-05	1.12724	0.881838	0.000128312	0.354208	3.89173	['Q02878']	RPL6
2008	sp|Q16698|DECR_HUMAN	15	4	-5.7426	1.73739e-05	0.266336	1.37175	0.000131487	-2.3647	3.88112	['Q16698']	DECR1
532	sp|P06730|IF4E_HUMAN	3	2	-8.97774	1.75637e-05	1.41471	0.674907	0.000132641	1.06775	3.87732	['P06730']	EIF4E
479	sp|P02768|ALBU_HUMAN	5	3	-4.4721	1.77772e-05	0.454705	1.17446	0.000133969	-1.36899	3.873	['P02768']	ALB
1935	sp|Q15233|NONO_HUMAN	16	10	-4.45473	1.83e-05	0.428925	1.04224	0.000137617	-1.28088	3.86133	['Q15233']	NONO
2434	sp|Q8NE71|ABCF1_HUMAN	11	4	-3.47529	1.88384e-05	1.1286	0.338947	0.000141368	1.73541	3.84965	['Q8NE71']	ABCF1
1896	sp|Q14789|GOGB1_HUMAN	56	22	-5.00953	1.89335e-05	0.134776	0.335349	0.000141627	-1.3151	3.84886	['Q14789']	GOLGB1
2805	sp|Q99873|ANM1_HUMAN	12	5	-4.73754	1.89526e-05	1.22746	0.472142	0.000141627	1.37838	3.84886	['Q99873']	PRMT1
1813	sp|Q13620|CUL4B_HUMAN	36	22	-2.53942	1.90271e-05	0.369051	0.552058	0.000141886	-0.581002	3.84806	['Q13620']	CUL4B
1774	sp|Q13363|CTBP1_HUMAN	7	5	#NAME?	2.03127e-05	1.06788	0.373111	0.000151155	1.51707	3.82058	['Q13363']	CTBP1
3299	sp|Q9UH62|ARMX3_HUMAN	7	5	-2.50973	2.05451e-05	0.522281	1.02813	0.000152565	-0.977126	3.81654	['Q9UH62']	ARMCX3
2225	sp|Q7KZF4|SND1_HUMAN	34	14	-17.3405	2.111e-05	0.886551	1.12834	0.000156434	-0.347927	3.80567	['Q7KZF4']	SND1
601	sp|P09382|LEG1_HUMAN	8	4	0.630014	2.12036e-05	0.847219	1.18033	0.000156801	-0.478385	3.80465	['P09382']	LGALS1
3435	sp|Q9Y2R0|COA3_HUMAN	4	3	-6.6124	2.15913e-05	0.310712	1.11188	0.000159337	-1.83936	3.79768	['Q9Y2R0']	COA3
1860	sp|Q14257|RCN2_HUMAN	12	6	-1.92399	2.22834e-05	0.835938	1.20253	0.000164104	-0.524601	3.78488	['Q14257']	RCN2
2879	sp|Q9BWD1|THIC_HUMAN	4	2	-7.35556	2.28818e-05	1.14476	0.38672	0.000168162	1.56568	3.77427	['Q9BWD1']	ACAT2
1097	sp|P40227|TCPZ_HUMAN	18	9	-10.1413	2.34695e-05	0.32094	0.463149	0.000172126	-0.529172	3.76415	['P40227']	CCT6A
683	sp|P13010|XRCC5_HUMAN	29	16	#NAME?	2.40133e-05	0.504434	0.421684	0.000175752	0.258504	3.7551	['P13010']	XRCC5
795	sp|P19022|CADH2_HUMAN	17	8	-6.62093	2.42966e-05	0.915623	1.08575	0.00017746	-0.245865	3.7509	['P19022']	CDH2
2392	sp|Q8N4C8|MINK1_HUMAN	3	3	-5.35112	2.50824e-05	0.649223	0.539631	0.000182824	0.266741	3.73797	['Q8N4C8']	MINK1
1410	sp|P61158|ARP3_HUMAN	15	5	-5.61071	2.54285e-05	1.15245	0.541664	0.000184967	1.08923	3.7329	['P61158']	ACTR3
669	sp|P12036|NFH_HUMAN	2	2	#NAME?	2.59753e-05	0.867179	1.17266	0.00018856	-0.435385	3.72455	['P12036']	NEFH
386	sp|O95182|NDUA7_HUMAN	5	2	#NAME?	2.81786e-05	0.345325	1.18692	0.000204137	-1.78119	3.69008	['O95182']	NDUFA7
3108	sp|Q9NR56|MBNL1_HUMAN	3	2	-11.0787	2.91305e-05	0.36491	1.06541	0.000210604	-1.5458	3.67653	['Q9NR56']	MBNL1
2591	sp|Q92945|FUBP2_HUMAN	24	8	-2.74236	2.935e-05	0.86835	1.14736	0.00021176	-0.401968	3.67416	['Q92945']	KHSRP
655	sp|P11279|LAMP1_HUMAN	7	3	-3.5967	2.9638e-05	0.776704	1.28749	0.000212686	-0.729128	3.67226	['P11279']	LAMP1
802	sp|P19525|E2AK2_HUMAN	8	5	-11.2478	2.96552e-05	0.605215	0.194228	0.000212686	1.6397	3.67226	['P19525']	EIF2AK2
2971	sp|Q9H223|EHD4_HUMAN	15	6	-7.44895	2.96577e-05	0.700837	0.367701	0.000212686	0.930546	3.67226	['Q9H223']	EHD4
824	sp|P20962|PTMS_HUMAN	2	2	-8.21668	3.16934e-05	1.16483	0.390736	0.000226828	1.57585	3.6443	['P20962']	PTMS
1777	sp|Q13405|RM49_HUMAN	4	2	#NAME?	3.24885e-05	0.58576	1.06922	0.000232051	-0.868176	3.63442	['Q13405']	MRPL49
664	sp|P11766|ADHX_HUMAN	5	4	-131.39	3.29636e-05	0.652332	0.346919	0.000234973	0.911008	3.62898	['P11766']	ADH5
846	sp|P22392|NDKB_HUMAN	8	5	-0.7718	3.35752e-05	1.23358	0.820167	0.000238854	0.58886	3.62187	['P22392']	NME2
2110	sp|Q5T9A4|ATD3B_HUMAN	13	4	-5.94507	3.60406e-05	0.180749	1.18269	0.000255881	-2.71002	3.59196	['Q5T9A4']	ATAD3B
1039	sp|P35442|TSP2_HUMAN	3	3	-6.46268	3.95707e-05	0.444657	0.883699	0.000280384	-0.990861	3.55225	['P35442']	THBS2
39	sp|O00232|PSD12_HUMAN	8	4	-7.03965	3.98384e-05	1.10055	0.638872	0.00028172	0.784621	3.55018	['O00232']	PSMD12
754	sp|P16989|YBOX3_HUMAN	8	5	-5.25147	4.04245e-05	1.13102	0.891307	0.000285298	0.343632	3.5447	['P16989']	YBX3
1510	sp|P63096|GNAI1_HUMAN	6	3	-4.41574	4.09572e-05	0.787779	1.26601	0.000288485	-0.684429	3.53988	['P63096']	GNAI1
1461	sp|P62280|RS11_HUMAN	9	5	-3.37251	4.30115e-05	1.21713	0.79365	0.000302356	0.616905	3.51948	['P62280']	RPS11
3306	sp|Q9UHD8|SEPT9_HUMAN	13	5	-10.8019	4.33346e-05	1.10117	0.492782	0.000303899	1.16001	3.51727	['Q9UHD8']	2009-09-01
663	sp|P11717|MPRI_HUMAN	49	26	-5.80851	4.34502e-05	0.30112	0.490923	0.000303899	-0.705156	3.51727	['P11717']	IGF2R
868	sp|P23588|IF4B_HUMAN	6	2	4.9063	4.34873e-05	1.25431	0.7852	0.000303899	0.675768	3.51727	['P23588']	EIF4B
903	sp|P26368|U2AF2_HUMAN	10	5	-7.34771	4.43304e-05	0.764625	1.31087	0.000309183	-0.777703	3.50979	['P26368']	U2AF2
33	sp|O00193|SMAP_HUMAN	2	2	#NAME?	4.47388e-05	1.1747	0.311138	0.000311421	1.91666	3.50665	['O00193']	SMAP
3539	sp|Q9Y6B6|SAR1B_HUMAN	3	2	9.77865	4.50428e-05	1.28324	0.779279	0.000312924	0.719574	3.50456	['Q9Y6B6']	SAR1B
2372	sp|Q8N0X7|SPG20_HUMAN	3	2	-18.6461	4.58145e-05	1.09521	0.404223	0.000317665	1.43798	3.49803	['Q8N0X7']	SPG20
1114	sp|P41252|SYIC_HUMAN	20	12	#NAME?	4.59731e-05	0.520656	0.524522	0.000318145	-0.0106736	3.49738	['P41252']	IARS
898	sp|P26006|ITA3_HUMAN	20	13	-5.30125	4.79976e-05	0.87473	1.13098	0.00033151	-0.370664	3.4795	['P26006']	ITGA3
667	sp|P11940|PABP1_HUMAN	22	10	1.39876	4.81027e-05	1.2025	0.842982	0.000331592	0.512465	3.4794	['P11940']	PABPC1
1150	sp|P46060|RAGP1_HUMAN	17	5	-1.06328	4.9547e-05	0.486907	1.1453	0.000340887	-1.234	3.46739	['P46060']	RANGAP1
493	sp|P04181|OAT_HUMAN	16	6	-3.6621	4.9845e-05	0.86821	1.15568	0.000342276	-0.412625	3.46562	['P04181']	OAT
2266	sp|Q7Z5L9|I2BP2_HUMAN	12	4	-4.00916	5.01218e-05	1.20244	0.83391	0.000343513	0.528006	3.46406	['Q7Z5L9']	IRF2BP2
349	sp|O76021|RL1D1_HUMAN	11	5	-2.65656	5.06815e-05	0.841069	1.17665	0.000346681	-0.484388	3.46007	['O76021']	RSL1D1
894	sp|P25786|PSA1_HUMAN	12	5	-7.46679	5.22673e-05	1.14355	0.522554	0.000356611	1.12987	3.44781	['P25786']	PSMA1
2527	sp|Q8WXF1|PSPC1_HUMAN	8	3	-10.945	5.23337e-05	0.817696	1.24225	0.000356611	-0.603317	3.44781	['Q8WXF1']	PSPC1
1922	sp|Q15067|ACOX1_HUMAN	8	3	-17.0801	5.25151e-05	0.302899	1.03805	0.000357163	-1.77697	3.44713	['Q15067']	ACOX1
1748	sp|Q13123|RED_HUMAN	5	3	#NAME?	5.68235e-05	0.453548	1.19418	0.000385727	-1.39669	3.41372	['Q13123']	IK
956	sp|P30042|ES1_HUMAN	10	6	#NAME?	5.79993e-05	0.389499	1.16979	0.000392959	-1.58656	3.40565	['P30042']	C21orf33
3147	sp|Q9NUQ6|SPS2L_HUMAN	6	3	-14.5094	5.92248e-05	0.519161	0.123421	0.000400499	2.07259	3.3974	['Q9NUQ6']	SPATS2L
1831	sp|Q14019|COTL1_HUMAN	4	2	-153.525	6.06039e-05	1.31977	0.446602	0.000409047	1.56322	3.38823	['Q14019']	COTL1
3453	sp|Q9Y383|LC7L2_HUMAN	9	4	#NAME?	6.30581e-05	1.54439	0.628708	0.000424806	1.29658	3.37181	['Q9Y383']	LUC7L2
1625	sp|Q02818|NUCB1_HUMAN	18	13	-1.31445	6.41385e-05	0.352236	0.540943	0.000431268	-0.618933	3.36525	['Q02818']	NUCB1
2604	sp|Q969G5|PRDBP_HUMAN	9	6	0.423007	6.55329e-05	0.913006	1.09668	0.000439813	-0.264444	3.35673	['Q969G5']	PRKCDBP
3503	sp|Q9Y5E1|PCDB9_HUMAN	2	2	-3.26512	6.65115e-05	0.503277	1.27922	0.00044554	-1.34584	3.35111	['Q9Y5E1']	PCDHB9
990	sp|P31150|GDIA_HUMAN	9	4	#NAME?	6.71219e-05	0.565603	0.304439	0.000448783	0.893637	3.34796	['P31150']	GDI1
2639	sp|Q96C19|EFHD2_HUMAN	5	4	-8.44966	6.86651e-05	0.628718	0.884314	0.00045824	-0.492147	3.33891	['Q96C19']	EFHD2
2872	sp|Q9BVK6|TMED9_HUMAN	7	3	5.2268	7.26196e-05	0.346594	0.57885	0.000483723	-0.739945	3.3154	['Q9BVK6']	TMED9
1465	sp|P62314|SMD1_HUMAN	5	3	-5.43623	7.29349e-05	1.23054	0.806338	0.000484915	0.609839	3.31433	['P62314']	SNRPD1
2594	sp|Q92979|NEP1_HUMAN	3	2	-96.3472	7.31282e-05	1.35922	0.418964	0.000485293	1.69788	3.314	['Q92979']	EMG1
1854	sp|Q14204|DYHC1_HUMAN	54	20	1.97307	7.37005e-05	0.678555	0.381979	0.00048818	0.828971	3.31142	['Q14204']	DYNC1H1
1197	sp|P49023|PAXI_HUMAN	7	3	-4.246	7.50777e-05	0.622719	0.372826	0.000496378	0.740077	3.30419	['P49023']	PXN
1334	sp|P54819|KAD2_HUMAN	12	6	-7.18181	7.56905e-05	0.883607	1.13126	0.000499501	-0.356453	3.30146	['P54819']	AK2
1940	sp|Q15293|RCN1_HUMAN	15	3	1.16926	7.59785e-05	1.17946	0.852205	0.000500473	0.468849	3.30062	['Q15293']	RCN1
3042	sp|Q9HAT2|SIAE_HUMAN	4	2	#NAME?	7.91081e-05	0.419331	1.08923	0.000520125	-1.37715	3.28389	['Q9HAT2']	SIAE
401	sp|O95302|FKBP9_HUMAN	14	5	-6.41154	7.95459e-05	0.201382	1.05764	0.000522038	-2.39285	3.2823	['O95302']	FKBP9
555	sp|P07686|HEXB_HUMAN	14	6	-2.9612	8.1398e-05	0.90198	1.1052	0.00053321	-0.293146	3.2731	['P07686']	HEXB
1477	sp|P62736|ACTA_HUMAN	17	8	-0.57434	8.51301e-05	0.755923	1.30058	0.000556632	-0.782838	3.25443	['P62736']	ACTA2
291	sp|O75410|TACC1_HUMAN	17	12	-14.2509	8.5687e-05	0.601961	0.557271	0.000559245	0.111292	3.2524	['O75410']	TACC1
3161	sp|Q9NVI7|ATD3A_HUMAN	19	7	-10.7298	8.69233e-05	0.325548	1.10561	0.000566275	-1.7639	3.24697	['Q9NVI7']	ATAD3A
723	sp|P14927|QCR7_HUMAN	8	6	-15.8071	8.90214e-05	0.590825	1.09189	0.000578883	-0.88603	3.23741	['P14927']	UQCRB
1444	sp|P62070|RRAS2_HUMAN	3	3	-16.3941	9.02912e-05	1.01829	0.574056	0.000586069	0.826879	3.23205	['P62070']	RRAS2
1485	sp|P62834|RAP1A_HUMAN	8	6	-7.76611	9.12908e-05	0.329009	1.11872	0.000591478	-1.76565	3.22806	['P62834']	RAP1A
1488	sp|P62851|RS25_HUMAN	6	4	-1.59241	9.19449e-05	1.05285	0.949799	0.000594633	0.148613	3.22575	['P62851']	RPS25
1199	sp|P49207|RL34_HUMAN	3	3	-1.93729	9.22078e-05	1.07855	0.932193	0.000595251	0.21039	3.2253	['P49207']	RPL34
595	sp|P09001|RM03_HUMAN	3	2	#NAME?	9.58369e-05	0.4144	1.04175	0.000617558	-1.32992	3.20932	['P09001']	MRPL3
151	sp|O15533|TPSN_HUMAN	7	3	-0.134225	9.90169e-05	1.08235	0.270208	0.000636895	2.00203	3.19593	['O15533']	TAPBP
180	sp|O43491|E41L2_HUMAN	25	19	#NAME?	9.94198e-05	0.266668	0.470623	0.000637787	-0.819524	3.19532	['O43491']	EPB41L2
1853	sp|Q14203|DCTN1_HUMAN	16	7	-10.3667	9.95141e-05	0.604942	0.431785	0.000637787	0.486485	3.19532	['Q14203']	DCTN1
1031	sp|P35240|MERL_HUMAN	12	8	-12.4278	0.00010006	0.360911	0.630126	0.000640133	-0.803997	3.19373	['P35240']	NF2
2020	sp|Q16836|HCDH_HUMAN	10	5	-7.2359	0.000104784	0.839014	1.19172	0.000668469	-0.506283	3.17492	['Q16836']	HADH
1899	sp|Q14956|GPNMB_HUMAN	2	2	#NAME?	0.000104865	1.24817	0.80117	0.000668469	0.639639	3.17492	['Q14956']	GPNMB
709	sp|P14314|GLU2B_HUMAN	20	6	-14.5613	0.000105807	0.26926	1.34297	0.000673269	-2.31835	3.17181	['P14314']	PRKCSH
2037	sp|Q3ZCM7|TBB8_HUMAN	10	5	-2.17134	0.000107176	1.24182	0.762384	0.000680758	0.703871	3.16701	['Q3ZCM7']	TUBB8
3156	sp|Q9NVA2|SEP11_HUMAN	11	4	-0.160974	0.000108731	1.07923	0.440175	0.000689402	1.29385	3.16153	['Q9NVA2']	2011-09-01
1645	sp|Q04760|LGUL_HUMAN	5	3	-17.8034	0.00010896	0.521702	0.399494	0.000689628	0.385052	3.16139	['Q04760']	GLO1
1793	sp|Q13501|SQSTM_HUMAN	11	6	-5.59003	0.000109589	1.16668	0.84749	0.000692197	0.461143	3.15977	['Q13501']	SQSTM1
1704	sp|Q10570|CPSF1_HUMAN	8	4	#NAME?	0.000109896	0.382189	0.479589	0.000692197	-0.327515	3.15977	['Q10570']	CPSF1
194	sp|O43681|ASNA_HUMAN	6	2	-11.5623	0.00010995	0.819185	1.19666	0.000692197	-0.546747	3.15977	['O43681']	ASNA1
790	sp|P18827|SDC1_HUMAN	2	2	-3.75396	0.000111312	0.857591	1.14828	0.000699532	-0.421113	3.15519	['P18827']	SDC1
1976	sp|Q15758|AAAT_HUMAN	6	3	#NAME?	0.000114242	0.538353	1.16207	0.000716684	-1.11008	3.14467	['Q15758']	SLC1A5
1752	sp|Q13153|PAK1_HUMAN	3	3	-3.93411	0.000115895	1.20893	0.613347	0.000725774	0.978958	3.1392	['Q13153']	PAK1
1355	sp|P55795|HNRH2_HUMAN	16	6	1.41326	0.000119572	0.730677	1.35084	0.000747483	-0.886556	3.1264	['P55795']	HNRNPH2
1249	sp|P50914|RL14_HUMAN	4	3	-7.13999	0.00012175	0.754203	0.439069	0.000759765	0.780505	3.11932	['P50914']	RPL14
1157	sp|P46459|NSF_HUMAN	22	12	#NAME?	0.000122564	0.994143	0.407282	0.000763503	1.28742	3.11719	['P46459']	NSF
565	sp|P07951|TPM2_HUMAN	13	6	-7.97791	0.000124871	0.345581	0.937495	0.000776514	-1.43979	3.10985	['P07951']	TPM2
829	sp|P21291|CSRP1_HUMAN	8	6	0.300133	0.00012675	0.700192	0.355887	0.000786823	0.976333	3.10412	['P21291']	CSRP1
330	sp|O75874|IDHC_HUMAN	11	6	-5.78997	0.000128695	0.606905	0.337516	0.000797503	0.846515	3.09827	['O75874']	IDH1
1071	sp|P36952|SPB5_HUMAN	6	4	-3.16405	0.000129191	0.78875	0.349738	0.000799186	1.17329	3.09735	['P36952']	SERPINB5
1720	sp|Q12849|GRSF1_HUMAN	11	6	-4.32317	0.00012946	0.436024	0.795991	0.000799458	-0.868346	3.0972	['Q12849']	GRSF1
948	sp|P29692|EF1D_HUMAN	13	8	-0.214711	0.000132367	1.21386	0.81688	0.000815589	0.5714	3.08853	['P29692']	EEF1D
2003	sp|Q16629|SRSF7_HUMAN	6	4	-20.1738	0.00013253	1.19255	0.172599	0.000815589	2.78855	3.08853	['Q16629']	SRSF7
666	sp|P11908|PRPS2_HUMAN	7	5	-6.92446	0.000133042	0.60062	0.326839	0.000817321	0.877873	3.08761	['P11908']	PRPS2
586	sp|P08648|ITA5_HUMAN	16	9	-11.5405	0.000134537	0.21965	0.494146	0.000825082	-1.16973	3.0835	['P08648']	ITGA5
1942	sp|Q15363|TMED2_HUMAN	5	5	#NAME?	0.000135548	0.452982	1.14107	0.000829849	-1.33287	3.081	['Q15363']	TMED2
3346	sp|Q9UKM9|RALY_HUMAN	15	6	-10.1182	0.000135943	1.20985	0.842537	0.00083084	0.52202	3.08048	['Q9UKM9']	RALY
634	sp|P10599|THIO_HUMAN	6	3	-3.81362	0.000139084	0.222961	0.987916	0.000847364	-2.1476	3.07193	['P10599']	TXN
477	sp|P02751|FINC_HUMAN	44	20	2.29731	0.000139123	1.03206	0.971702	0.000847364	0.0869397	3.07193	['P02751']	FN1
2361	sp|Q8IYM9|TRI22_HUMAN	5	4	#NAME?	0.000140006	0.611871	0.252885	0.000851282	1.27474	3.06993	['Q8IYM9']	TRIM22
2136	sp|Q69YZ2|T200B_HUMAN	2	2	-5.82519	0.000141415	0.628422	0.161738	0.000856658	1.95808	3.06719	['Q69YZ2']	TMEM200B
756	sp|P17066|HSP76_HUMAN	9	6	-11.9584	0.000141717	1.03743	0.320409	0.000856658	1.69502	3.06719	['P17066']	HSPA6
3330	sp|Q9UJS0|CMC2_HUMAN	24	7	-10.9641	0.000141892	0.364989	1.1984	0.000856658	-1.71519	3.06719	['Q9UJS0']	SLC25A13
1763	sp|Q13242|SRSF9_HUMAN	8	5	-135.532	0.000142032	0.431668	0.686268	0.000856658	-0.66885	3.06719	['Q13242']	SRSF9
580	sp|P08572|CO4A2_HUMAN	7	5	#NAME?	0.000142094	0.478294	1.06043	0.000856658	-1.14868	3.06719	['P08572']	COL4A2
3455	sp|Q9Y394|DHRS7_HUMAN	9	5	-9.62956	0.000144069	0.645546	1.04425	0.000867094	-0.693875	3.06193	['Q9Y394']	DHRS7
185	sp|O43592|XPOT_HUMAN	4	3	#NAME?	0.000144603	0.536976	0.250726	0.000868841	1.09875	3.06106	['O43592']	XPOT
1544	sp|P78347|GTF2I_HUMAN	26	12	-11.8856	0.000151775	0.322561	0.588158	0.000910393	-0.866634	3.04077	['P78347']	GTF2I
551	sp|P07355|ANXA2_HUMAN	27	11	6.05135	0.000155198	0.771319	1.27605	0.000929361	-0.72629	3.03182	['P07355']	ANXA2
658	sp|P11388|TOP2A_HUMAN	37	17	-0.656341	0.000157952	0.624664	0.335182	0.000944259	0.898136	3.02491	['P11388']	TOP2A
1173	sp|P47895|AL1A3_HUMAN	5	4	#NAME?	0.000159402	0.57925	0.282813	0.000951331	1.03434	3.02167	['P47895']	ALDH1A3
2058	sp|Q53H82|LACB2_HUMAN	3	2	#NAME?	0.000159701	0.494519	0.568522	0.000951516	-0.20119	3.02158	['Q53H82']	LACTB2
23	sp|O00116|ADAS_HUMAN	21	10	-136.579	0.000165229	1.05599	0.52487	0.000982808	1.00857	3.00753	['O00116']	AGPS
2318	sp|Q8IUX4|ABC3F_HUMAN	3	2	-1.6452	0.000169935	1.23395	0.401581	0.00100911	1.61953	2.99606	['Q8IUX4']	APOBEC3F
1702	sp|Q10471|GALT2_HUMAN	16	7	-10.9406	0.000176881	1.09446	0.459791	0.00104758	1.25117	2.97981	['Q10471']	GALNT2
1841	sp|Q14142|TRI14_HUMAN	5	4	#NAME?	0.000177002	0.589102	0.269176	0.00104758	1.12997	2.97981	['Q14142']	TRIM14
733	sp|P15586|GNS_HUMAN	12	5	-3.24085	0.000180103	0.411284	1.17347	0.00106346	-1.51257	2.97328	['P15586']	GNS
851	sp|P22694|KAPCB_HUMAN	6	5	-7.1803	0.000180283	0.718775	0.420398	0.00106346	0.773782	2.97328	['P22694']	PRKACB
861	sp|P23381|SYWC_HUMAN	6	3	-6.02067	0.000180763	0.426992	0.0802246	0.00106446	2.41209	2.97287	['P23381']	WARS
3223	sp|Q9NZT2|OGFR_HUMAN	9	3	-5.88652	0.000181065	0.489341	0.214555	0.00106446	1.18949	2.97287	['Q9NZT2']	OGFR
1676	sp|Q07954|LRP1_HUMAN	26	12	-4.01041	0.00018135	0.213838	0.423812	0.00106446	-0.986905	2.97287	['Q07954']	LRP1
2714	sp|Q96KP4|CNDP2_HUMAN	8	4	-3.34329	0.000181865	0.53737	0.213301	0.00106572	1.33303	2.97236	['Q96KP4']	CNDP2
12	sp|A6NGR9|MROH6_HUMAN	3	3	#NAME?	0.000184244	0.263273	0.402874	0.00107643	-0.613765	2.96801	['A6NGR9']	MROH6
1105	sp|P40938|RFC3_HUMAN	5	5	-6.83421	0.000184298	0.565424	0.383783	0.00107643	0.559044	2.96801	['P40938']	RFC3
1208	sp|P49454|CENPF_HUMAN	9	4	#NAME?	0.000186071	0.207223	0.0843131	0.00108501	1.29735	2.96457	['P49454']	CENPF
2562	sp|Q92688|AN32B_HUMAN	7	4	-8.00351	0.000187285	1.08921	0.457017	0.0010903	1.25296	2.96245	['Q92688']	ANP32B
2944	sp|Q9GZZ1|NAA50_HUMAN	3	3	-6.63043	0.000188402	0.712484	0.401661	0.00109501	0.826879	2.96058	['Q9GZZ1']	NAA50
2893	sp|Q9BXS5|AP1M1_HUMAN	9	4	#NAME?	0.000189473	0.381273	0.233574	0.00109944	0.706944	2.95883	['Q9BXS5']	AP1M1
877	sp|P24666|PPAC_HUMAN	4	3	#NAME?	0.000190559	0.659078	0.417195	0.00110394	0.659728	2.95705	['P24666']	ACP1
1540	sp|P78330|SERB_HUMAN	4	4	#NAME?	0.000196063	0.5427	0.337388	0.00113398	0.685745	2.9454	['P78330']	PSPH
1021	sp|P34897|GLYM_HUMAN	25	9	-10.7627	0.000200606	0.853762	1.19477	0.00115837	-0.484824	2.93615	['P34897']	SHMT2
1533	sp|P68371|TBB4B_HUMAN	20	7	6.6585	0.000204829	1.20645	0.820037	0.00118083	0.557002	2.92781	['P68371']	TUBB4B
272	sp|O75165|DJC13_HUMAN	16	7	-6.07192	0.000209752	0.600692	0.438014	0.00120726	0.45565	2.9182	['O75165']	DNAJC13
2231	sp|Q7L2H7|EIF3M_HUMAN	5	2	#NAME?	0.000211297	1.0967	0.289188	0.00121419	1.92309	2.91571	['Q7L2H7']	EIF3M
2116	sp|Q5U5X0|LYRM7_HUMAN	2	2	-11.7211	0.000215652	0.456125	1.07912	0.00123722	-1.24235	2.90755	['Q5U5X0']	LYRM7
35	sp|O00203|AP3B1_HUMAN	4	3	-8.07076	0.000217452	0.768057	0.433201	0.00124355	0.826177	2.90534	['O00203']	AP3B1
172	sp|O43395|PRPF3_HUMAN	6	4	#NAME?	0.000217455	0.402741	0.669412	0.00124355	-0.733043	2.90534	['O43395']	PRPF3
1209	sp|P49458|SRP09_HUMAN	4	3	-1.8643	0.000223376	1.15107	0.875871	0.00127536	0.394182	2.89437	['P49458']	SRP9
762	sp|P17480|UBF1_HUMAN	6	4	#NAME?	0.000228067	1.06719	0.518467	0.00130006	1.0415	2.88604	['P17480']	UBTF
454	sp|P00492|HPRT_HUMAN	9	5	-1.46776	0.000230064	0.63299	0.337991	0.00130934	0.905195	2.88295	['P00492']	HPRT1
588	sp|P08708|RS17_HUMAN;sp|P0CW22|RS17L_HUMAN	8	4	-3.79159	0.000233409	1.21744	0.821395	0.00132626	0.567705	2.87737	['P08708', 'P0CW22']	RPS17
1815	sp|Q13637|RAB32_HUMAN	9	5	#NAME?	0.000245915	0.396472	0.504798	0.00139509	-0.348488	2.8554	['Q13637']	RAB32
883	sp|P24941|CDK2_HUMAN	5	3	#NAME?	0.000255412	0.262547	0.273237	0.00144666	-0.0575749	2.83963	['P24941']	CDK2
676	sp|P12268|IMDH2_HUMAN	7	2	-13.7735	0.000256329	1.16143	0.56988	0.00144954	1.02718	2.83877	['P12268']	IMPDH2
2004	sp|Q16630|CPSF6_HUMAN	8	3	-25.3123	0.000262801	1.16007	0.462436	0.00148378	1.32689	2.82863	['Q16630']	CPSF6
717	sp|P14678|RSMB_HUMAN	7	4	-6.89612	0.000266122	0.44842	1.23007	0.00149744	-1.45581	2.82465	['P14678']	SNRPB
1513	sp|P63162|RSMN_HUMAN	7	4	-6.7913	0.000266122	0.459259	1.21002	0.00149744	-1.39765	2.82465	['P63162']	SNRPN
998	sp|P31942|HNRH3_HUMAN	10	6	-20.0123	0.000266483	0.453892	0.683033	0.00149744	-0.589606	2.82465	['P31942']	HNRNPH3
1914	sp|Q15029|U5S1_HUMAN	32	16	-23.5514	0.00026897	0.453904	0.486355	0.00150903	-0.0996223	2.8213	['Q15029']	EFTUD2
2347	sp|Q8IXM3|RM41_HUMAN	3	3	#NAME?	0.000277511	0.508299	0.461858	0.0015545	0.138227	2.80841	['Q8IXM3']	MRPL41
94	sp|O14818|PSA7_HUMAN	9	4	0.152369	0.000285311	1.14241	0.561484	0.00159568	1.02476	2.79705	['O14818']	PSMA7
685	sp|P13473|LAMP2_HUMAN	6	3	-4.85936	0.000287187	0.0917565	1.18326	0.00160365	-3.68881	2.79489	['P13473']	LAMP2
3092	sp|Q9NQP4|PFD4_HUMAN	2	2	-6.46112	0.000293222	1.10006	0.528668	0.00163478	1.05714	2.78654	['Q9NQP4']	PFDN4
215	sp|O43865|SAHH2_HUMAN	3	3	#NAME?	0.00029371	0.522181	0.285311	0.00163494	0.872013	2.7865	['O43865']	AHCYL1
2612	sp|Q969X5|ERGI1_HUMAN	5	4	-10.2083	0.000296627	0.56915	1.0472	0.0016486	-0.87966	2.78289	['Q969X5']	ERGIC1
3261	sp|Q9UBB5|MBD2_HUMAN	3	3	#NAME?	0.000297766	0.405494	0.48684	0.00165087	-0.263766	2.78229	['Q9UBB5']	MBD2
1398	sp|P60953|CDC42_HUMAN	6	3	-1.6931	0.000297964	1.18883	0.841164	0.00165087	0.499083	2.78229	['P60953']	CDC42
1408	sp|P61088|UBE2N_HUMAN	2	2	-6.76245	0.000299894	1.14159	0.546867	0.00165898	1.06179	2.78016	['P61088']	UBE2N
697	sp|P13796|PLSL_HUMAN	6	4	0.0570806	0.000311407	1.18578	0.84524	0.00171999	0.488404	2.76447	['P13796']	LCP1
3474	sp|Q9Y3E5|PTH2_HUMAN	4	3	-146.536	0.000314418	1.00958	0.488469	0.00173393	1.04742	2.76097	['Q9Y3E5']	PTRH2
731	sp|P15531|NDKA_HUMAN	7	4	-3.14875	0.000318942	1.22026	0.809641	0.00175616	0.59184	2.75544	['P15531']	NME1
1146	sp|P45954|ACDSB_HUMAN	9	5	-6.46182	0.000320895	0.326018	1.06425	0.00176418	-1.70681	2.75346	['P45954']	ACADSB
1829	sp|Q14008|CKAP5_HUMAN	26	15	#NAME?	0.000323456	0.428194	0.456126	0.00177551	-0.0911678	2.75068	['Q14008']	CKAP5
1132	sp|P43034|LIS1_HUMAN	6	3	#NAME?	0.000330342	0.606097	0.416172	0.00181052	0.542369	2.7422	['P43034']	PAFAH1B1
1282	sp|P52209|6PGD_HUMAN	9	3	-1.69107	0.000334542	1.31948	0.786534	0.00183072	0.746391	2.73738	['P52209']	PGD
1787	sp|Q13442|HAP28_HUMAN	4	3	-3.73717	0.000346461	1.19664	0.301096	0.00189303	1.9907	2.72284	['Q13442']	PDAP1
2046	sp|Q4VC31|CCD58_HUMAN	3	2	#NAME?	0.000349034	0.420358	1.40298	0.00190416	-1.7388	2.7203	['Q4VC31']	CCDC58
915	sp|P27348|1433T_HUMAN	12	8	2.67009	0.000350102	1.22401	0.822751	0.00190706	0.573083	2.71964	['P27348']	YWHAQ
1995	sp|Q16527|CSRP2_HUMAN	6	4	-5.29871	0.000351065	0.513754	0.33118	0.00190938	0.633462	2.71911	['Q16527']	CSRP2
1446	sp|P62136|PP1A_HUMAN	14	13	-8.08492	0.000354615	1.01195	0.98686	0.00192575	0.0362224	2.7154	['P62136']	PPP1CA
1767	sp|Q13283|G3BP1_HUMAN	16	8	#NAME?	0.000395782	1.08845	0.912776	0.00214603	0.253941	2.66836	['Q13283']	G3BP1
777	sp|P18031|PTN1_HUMAN	14	8	-0.86885	0.000404588	0.871987	1.1447	0.00219044	-0.392591	2.65947	['P18031']	PTPN1
2000	sp|Q16576|RBBP7_HUMAN	14	11	-19.3934	0.000407486	0.388883	0.377617	0.00220278	0.042413	2.65703	['Q16576']	RBBP7
2555	sp|Q92616|GCN1L_HUMAN	11	5	-10.3683	0.000408196	0.379054	0.077389	0.00220327	2.2922	2.65693	['Q92616']	GCN1L1
921	sp|P27701|CD82_HUMAN	4	2	-6.97966	0.000410575	0.344857	1.26761	0.00221032	-1.87804	2.65555	['P27701']	CD82
2998	sp|Q9H4G4|GAPR1_HUMAN	3	3	#NAME?	0.000410745	0.914987	1.08574	0.00221032	-0.246858	2.65555	['Q9H4G4']	GLIPR2
2996	sp|Q9H4B7|TBB1_HUMAN	4	3	-10.1706	0.000414177	1.24155	0.413794	0.00222542	1.58516	2.65259	['Q9H4B7']	TUBB1
1067	sp|P36578|RL4_HUMAN	17	7	-11.5631	0.000417865	1.18195	0.839025	0.00224185	0.494382	2.64939	['P36578']	RPL4
838	sp|P22033|MUTA_HUMAN	7	3	#NAME?	0.000425926	0.587907	0.693225	0.00228165	-0.237735	2.64175	['P22033']	MUT
1272	sp|P51659|DHB4_HUMAN	23	9	-10.6875	0.000426802	0.911992	1.08689	0.00228291	-0.253115	2.64151	['P51659']	HSD17B4
486	sp|P04066|FUCO_HUMAN	3	3	#NAME?	0.000431753	0.0899356	0.260286	0.00230593	-1.53313	2.63715	['P04066']	FUCA1
1888	sp|Q14692|BMS1_HUMAN	8	3	0.40113	0.0004418	0.393069	0.159523	0.00235605	1.30102	2.62782	['Q14692']	BMS1
1187	sp|P48556|PSMD8_HUMAN	6	3	-10.0567	0.000444439	0.65819	0.68902	0.00236657	-0.0660411	2.62588	['P48556']	PSMD8
1971	sp|Q15691|MARE1_HUMAN	9	5	-5.68909	0.000447784	0.626686	0.842623	0.00238082	-0.427144	2.62327	['Q15691']	MAPRE1
374	sp|O94979|SC31A_HUMAN	7	5	-8.03031	0.000467858	0.463567	0.313255	0.00248384	0.565439	2.60488	['O94979']	SEC31A
557	sp|P07737|PROF1_HUMAN	8	4	0.119987	0.000471155	1.2091	0.819432	0.00249761	0.561237	2.60247	['P07737']	PFN1
2738	sp|Q96QE5|TEFM_HUMAN	3	3	#NAME?	0.000474749	0.485495	0.432081	0.00251292	0.168153	2.59982	['Q96QE5']	TEFM
1435	sp|P61923|COPZ1_HUMAN	3	2	3.24352	0.000476713	1.23179	0.80242	0.00251957	0.618331	2.59867	['P61923']	COPZ1
2485	sp|Q8TDB4|HUMMR_HUMAN	2	2	-5.35272	0.000490632	0.678899	1.12727	0.00258858	-0.73156	2.58694	['Q8TDB4']	MGARP
2991	sp|Q9H444|CHM4B_HUMAN	6	3	#NAME?	0.000491227	0.75857	0.433623	0.00258858	0.806841	2.58694	['Q9H444']	CHMP4B
1996	sp|Q16531|DDB1_HUMAN	27	10	-8.97323	0.000496622	0.354877	0.531269	0.00261314	-0.582122	2.58284	['Q16531']	DDB1
983	sp|P30622|CLIP1_HUMAN	9	3	-9.27682	0.000500372	0.546593	0.199541	0.00262898	1.45378	2.58021	['P30622']	CLIP1
3535	sp|Q9Y678|COPG1_HUMAN	17	9	-6.53354	0.000508639	0.414446	0.174544	0.00266502	1.24759	2.5743	['Q9Y678']	COPG1
1167	sp|P46940|IQGA1_HUMAN	61	21	-2.22318	0.00050873	1.02892	0.972369	0.00266502	0.0815539	2.5743	['P46940']	IQGAP1
833	sp|P21796|VDAC1_HUMAN	17	8	-10.1964	0.000512855	1.13364	0.88357	0.00268268	0.359552	2.57143	['P21796']	VDAC1
1526	sp|P67812|SC11A_HUMAN	8	5	-8.32962	0.000523299	0.523502	0.653804	0.0027333	-0.320663	2.56331	['P67812']	SEC11A
520	sp|P05455|LA_HUMAN	15	6	-9.99995	0.000534915	0.435195	0.202083	0.00278987	1.10671	2.55442	['P05455']	SSB
2986	sp|Q9H3N1|TMX1_HUMAN	11	7	-9.34593	0.000540352	0.205532	0.197737	0.0028141	0.0557833	2.55066	['Q9H3N1']	TMX1
2102	sp|Q5T3F8|CSCL2_HUMAN	2	2	#NAME?	0.000541998	1.29456	0.738062	0.00281855	0.810645	2.54997	['Q5T3F8']	TMEM63B
1479	sp|P62750|RL23A_HUMAN	8	4	-1.24437	0.000544046	1.22482	0.797744	0.00282507	0.618576	2.54897	['P62750']	RPL23A
2371	sp|Q8N0U8|VKORL_HUMAN	3	2	-2.26751	0.000552275	0.800635	1.18175	0.00286362	-0.561709	2.54309	['Q8N0U8']	VKORC1L1
2984	sp|Q9H361|PABP3_HUMAN	11	5	-0.567969	0.000553452	1.21868	0.809849	0.00286554	0.589591	2.54279	['Q9H361']	PABPC3
552	sp|P07384|CAN1_HUMAN	7	3	-4.91933	0.000562796	0.835622	0.485153	0.00290969	0.784411	2.53615	['P07384']	CAPN1
2691	sp|Q96HE7|ERO1A_HUMAN	17	7	-15.2991	0.000565036	0.604023	1.05106	0.00291703	-0.799165	2.53506	['Q96HE7']	ERO1L
1764	sp|Q13243|SRSF5_HUMAN	5	2	#NAME?	0.000567194	0.549257	1.14108	0.00292393	-1.05484	2.53403	['Q13243']	SRSF5
1004	sp|P32119|PRDX2_HUMAN	9	6	4.86526	0.000569962	0.309585	0.337703	0.00293395	-0.125419	2.53255	['P32119']	PRDX2
1248	sp|P50897|PPT1_HUMAN	4	4	#NAME?	0.000571099	0.509051	0.66034	0.00293555	-0.3754	2.53231	['P50897']	PPT1
18	sp|A8MTJ3|GNAT3_HUMAN	3	2	#NAME?	0.000572758	0.781906	1.24244	0.00293983	-0.66811	2.53168	['A8MTJ3']	GNAT3
2715	sp|Q96KR1|ZFR_HUMAN	19	7	-8.91131	0.000576145	0.240882	0.352385	0.00295295	-0.548828	2.52974	['Q96KR1']	ZFR
3336	sp|Q9UJY1|HSPB8_HUMAN	2	2	#NAME?	0.000582197	0.673726	0.587284	0.00297968	0.198106	2.52583	['Q9UJY1']	HSPB8
3480	sp|Q9Y3U8|RL36_HUMAN	3	2	-3.86018	0.000596255	0.680939	1.43371	0.00304724	-1.07415	2.51609	['Q9Y3U8']	RPL36
1495	sp|P62888|RL30_HUMAN	7	3	#NAME?	0.000598962	1.28149	0.746639	0.00305668	0.779335	2.51475	['P62888']	RPL30
2993	sp|Q9H488|OFUT1_HUMAN	4	3	-4.6758	0.000601961	1.16532	0.845998	0.00306759	0.462004	2.5132	['Q9H488']	POFUT1
2598	sp|Q93063|EXT2_HUMAN	2	2	#NAME?	0.000603263	0.308502	0.749458	0.00306982	-1.28057	2.51289	['Q93063']	EXT2
1342	sp|P55060|XPO2_HUMAN	20	10	2.20805	0.000611955	0.639128	0.362102	0.0031096	0.819707	2.50729	['P55060']	CSE1L
1357	sp|P55854|SUMO3_HUMAN	2	2	#NAME?	0.000615056	1.44807	0.0693996	0.0031209	4.38306	2.50572	['P55854']	SUMO3
1338	sp|P55010|IF5_HUMAN	4	2	#NAME?	0.000620022	0.565636	0.511615	0.00314162	0.144814	2.50285	['P55010']	EIF5
904	sp|P26373|RL13_HUMAN	7	4	2.24268	0.000623923	1.24395	0.801779	0.00315689	0.633657	2.50074	['P26373']	RPL13
478	sp|P02765|FETUA_HUMAN	3	3	2.91479	0.000627419	0.797499	1.27894	0.00317007	-0.68139	2.49893	['P02765']	AHSG
2626	sp|Q96AK3|ABC3D_HUMAN	3	3	-1.62172	0.000632943	0.756619	0.472334	0.00319142	0.679759	2.49602	['Q96AK3']	APOBEC3D
2012	sp|Q16740|CLPP_HUMAN	6	3	-8.49597	0.000633438	0.863715	1.16564	0.00319142	-0.432495	2.49602	['Q16740']	CLPP
2721	sp|Q96N66|MBOA7_HUMAN	5	3	-0.180387	0.000636161	0.258668	0.331523	0.0032006	-0.358007	2.49477	['Q96N66']	MBOAT7
1753	sp|Q13155|AIMP2_HUMAN	6	4	-5.70286	0.000646247	1.0979	0.605619	0.00324457	0.858266	2.48884	['Q13155']	AIMP2
59	sp|O00505|IMA4_HUMAN	9	5	-21.7541	0.000646724	1.09475	0.556471	0.00324457	0.976224	2.48884	['O00505']	KPNA3
3417	sp|Q9Y282|ERGI3_HUMAN	7	4	-1.68056	0.000651315	0.433768	0.712269	0.003263	-0.715499	2.48638	['Q9Y282']	ERGIC3
2217	sp|Q70UQ0|IKIP_HUMAN	13	6	-7.53712	0.000654157	0.906479	1.11275	0.00327263	-0.29578	2.4851	['Q70UQ0']	IKBIP
3244	sp|Q9P258|RCC2_HUMAN	12	6	-5.72183	0.000655941	0.236516	0.169102	0.00327509	0.484045	2.48478	['Q9P258']	RCC2
324	sp|O75792|RNH2A_HUMAN	2	2	#NAME?	0.000656491	0.601948	0.237533	0.00327509	1.34151	2.48478	['O75792']	RNASEH2A
2539	sp|Q92499|DDX1_HUMAN	23	9	-4.26794	0.000658028	0.569866	0.407765	0.00327816	0.482884	2.48437	['Q92499']	DDX1
3143	sp|Q9NUJ1|ABHDA_HUMAN	8	6	-3.7136	0.00066107	0.970943	0.537627	0.00328871	0.852781	2.48297	['Q9NUJ1']	ABHD10
38	sp|O00231|PSD11_HUMAN	18	5	-13.2311	0.000662356	0.637621	0.481054	0.0032905	0.4065	2.48274	['O00231']	PSMD11
84	sp|O14672|ADA10_HUMAN	14	8	-8.95036	0.000674032	0.324218	0.538106	0.00334384	-0.730926	2.47575	['O14672']	ADAM10
1388	sp|P60468|SC61B_HUMAN	3	2	-4.16791	0.000679222	0.365431	1.31556	0.00336489	-1.84801	2.47303	['P60468']	SEC61B
1339	sp|P55011|S12A2_HUMAN	7	4	-8.5138	0.000686061	0.384239	0.721957	0.00339404	-0.90991	2.46928	['P55011']	SLC12A2
1474	sp|P62633|CNBP_HUMAN	5	2	-10.1764	0.000690677	1.13231	0.883152	0.00341214	0.358533	2.46697	['P62633']	CNBP
3225	sp|Q9NZW5|MPP6_HUMAN	12	5	-10.885	0.000700477	0.339639	0.465949	0.00345575	-0.456168	2.46146	['Q9NZW5']	MPP6
1257	sp|P51149|RAB7A_HUMAN	17	10	-7.78724	0.000703002	0.810202	1.25339	0.00346341	-0.629488	2.4605	['P51149']	RAB7A
2572	sp|Q92804|RBP56_HUMAN	10	6	-6.72897	0.000714019	0.834105	1.20563	0.00351281	-0.53148	2.45434	['Q92804']	TAF15
2283	sp|Q86TX2|ACOT1_HUMAN	6	3	-119.59	0.000728709	1.11931	0.605718	0.00358013	0.88589	2.4461	['Q86TX2']	ACOT1
626	sp|P10114|RAP2A_HUMAN	2	2	#NAME?	0.000730146	0.713569	0.670701	0.00358225	0.0893826	2.44584	['P10114']	RAP2A
1205	sp|P49411|EFTU_HUMAN	26	10	-12.1101	0.000756819	0.857916	1.1662	0.00370394	-0.442908	2.43134	['P49411']	TUFM
707	sp|P14174|MIF_HUMAN	2	2	#NAME?	0.000757032	0.439499	0.414433	0.00370394	0.0847192	2.43134	['P14174']	MIF
1080	sp|P38117|ETFB_HUMAN	13	6	-7.14816	0.000771822	0.875663	1.12641	0.00377111	-0.363282	2.42353	['P38117']	ETFB
2524	sp|Q8WWY3|PRP31_HUMAN	6	2	#NAME?	0.000776136	0.405895	1.20346	0.00378573	-1.56801	2.42185	['Q8WWY3']	PRPF31
937	sp|P28482|MK01_HUMAN	3	3	-4.78367	0.000776942	0.694684	0.340638	0.00378573	1.02812	2.42185	['P28482']	MAPK1
1887	sp|Q14690|RRP5_HUMAN	21	5	-153.525	0.00079315	0.996966	0.419219	0.00385942	1.24984	2.41348	['Q14690']	PDCD11
2739	sp|Q96QK1|VPS35_HUMAN	13	7	-6.06971	0.00080104	0.574798	0.410662	0.00389248	0.485106	2.40977	['Q96QK1']	VPS35
3515	sp|Q9Y5M8|SRPRB_HUMAN	13	7	-4.79969	0.000810725	0.932702	1.07344	0.00393417	-0.202755	2.40515	['Q9Y5M8']	SRPRB
2926	sp|Q9BZZ5|API5_HUMAN	13	12	#NAME?	0.000838423	0.291516	0.270273	0.00406304	0.109159	2.39115	['Q9BZZ5']	API5
232	sp|O60493|SNX3_HUMAN	6	3	-4.39084	0.000865986	0.700437	0.322963	0.0041909	1.11689	2.37769	['O60493']	SNX3
1447	sp|P62140|PP1B_HUMAN	12	11	-7.2038	0.000885354	1.11251	0.898957	0.00427881	0.307493	2.36868	['P62140']	PPP1CB
3303	sp|Q9UHB6|LIMA1_HUMAN	26	7	-9.29053	0.000888145	0.89359	1.11975	0.00428647	-0.325485	2.3679	['Q9UHB6']	LIMA1
371	sp|O94919|ENDD1_HUMAN	5	3	-7.04059	0.000926812	0.759585	0.666343	0.00446703	0.188945	2.34998	['O94919']	ENDOD1
1863	sp|Q14318|FKBP8_HUMAN	7	4	-18.2904	0.000958259	0.250592	0.545095	0.00461235	-1.12117	2.33608	['Q14318']	FKBP8
2918	sp|Q9BZF1|OSBL8_HUMAN	11	3	-10.4894	0.000966109	0.274718	1.08337	0.00464385	-1.97951	2.33312	['Q9BZF1']	OSBPL8
682	sp|P12956|XRCC6_HUMAN	27	8	-4.94106	0.000970656	0.939328	1.05811	0.00465941	-0.17179	2.33167	['P12956']	XRCC6
86	sp|O14735|CDIPT_HUMAN	2	2	#NAME?	0.000973241	0.285078	0.668313	0.00466552	-1.22917	2.3311	['O14735']	CDIPT
1207	sp|P49448|DHE4_HUMAN	18	6	-4.63726	0.000986134	0.757035	1.32119	0.00472097	-0.803402	2.32597	['P49448']	GLUD2
700	sp|P13804|ETFA_HUMAN	14	10	-8.23634	0.000995224	0.956666	1.04365	0.00475808	-0.125548	2.32257	['P13804']	ETFA
3359	sp|Q9ULD0|OGDHL_HUMAN	13	8	-8.1131	0.000997023	0.955711	0.554424	0.00476028	0.785585	2.32237	['Q9ULD0']	OGDHL
270	sp|O75152|ZC11A_HUMAN	3	2	-6.82909	0.00103262	1.09917	0.416991	0.00492366	1.39833	2.30771	['O75152']	ZC3H11A
1481	sp|P62805|H4_HUMAN	9	4	0.904353	0.00103979	0.802389	1.24628	0.0049512	-0.635254	2.30529	['P62805']	HIST1H4A
1437	sp|P61956|SUMO2_HUMAN	2	2	0.970401	0.00104313	1.73335	0.52355	0.00496043	1.72716	2.30448	['P61956']	SUMO2
934	sp|P28331|NDUS1_HUMAN	24	8	-1.85824	0.00104807	0.861883	1.14843	0.00497728	-0.414102	2.30301	['P28331']	NDUFS1
1101	sp|P40763|STAT3_HUMAN	6	4	-17.5522	0.00105831	0.530951	0.228002	0.00501923	1.21953	2.29936	['P40763']	STAT3
174	sp|O43399|TPD54_HUMAN	9	5	-5.93849	0.00107245	1.11813	0.890902	0.00507948	0.327745	2.29418	['O43399']	TPD52L2
1346	sp|P55145|MANF_HUMAN	11	4	-3.78272	0.00107783	0.867733	1.1326	0.00509821	-0.384314	2.29258	['P55145']	MANF
573	sp|P08195|4F2_HUMAN	18	9	-7.50277	0.00108799	0.901223	1.1115	0.00513939	-0.302556	2.28909	['P08195']	SLC3A2
1270	sp|P51648|AL3A2_HUMAN	7	4	-23.7382	0.00109177	1.04461	0.647832	0.00515045	0.689268	2.28815	['P51648']	ALDH3A2
928	sp|P28066|PSA5_HUMAN	8	3	-9.07803	0.00109655	1.12032	0.890234	0.00516612	0.331648	2.28684	['P28066']	PSMA5
103	sp|O14964|HGS_HUMAN	4	2	-6.48016	0.00110797	1.19185	0.831492	0.00521302	0.519423	2.28291	['O14964']	HGS
229	sp|O60361|NDK8_HUMAN	6	4	-5.15646	0.00112827	0.973307	1.02449	0.00530126	-0.0739328	2.27562	['O60361']	NME2P1
2051	sp|Q53EU6|GPAT3_HUMAN	6	3	-87.9019	0.0011297	0.664298	0.346594	0.00530126	0.938582	2.27562	['Q53EU6']	AGPAT9
968	sp|P30260|CDC27_HUMAN	2	2	#NAME?	0.00116868	0.61678	0.337292	0.00547695	0.870759	2.26146	['P30260']	CDC27
1624	sp|Q02809|PLOD1_HUMAN	20	11	-21.0446	0.00117153	0.931983	1.07512	0.00548308	-0.206124	2.26098	['Q02809']	PLOD1
3251	sp|Q9P2E9|RRBP1_HUMAN	49	15	-3.34185	0.00121928	1.16834	0.852227	0.00569904	0.455146	2.2442	['Q9P2E9']	RRBP1
1147	sp|P45973|CBX5_HUMAN	9	4	1.46876	0.00123089	0.534829	0.78774	0.00574575	-0.558642	2.24065	['P45973']	CBX5
254	sp|O60832|DKC1_HUMAN	17	6	-7.65155	0.00123824	0.864531	1.16833	0.0057725	-0.434457	2.23864	['O60832']	DKC1
1712	sp|Q12797|ASPH_HUMAN	19	8	-12.0822	0.00126919	0.365771	0.380769	0.0059057	-0.0579753	2.22873	['Q12797']	ASPH
2532	sp|Q8WY22|BRI3B_HUMAN	3	2	-4.34144	0.00127013	0.223429	1.16193	0.0059057	-2.37864	2.22873	['Q8WY22']	BRI3BP
2595	sp|Q93009|UBP7_HUMAN	16	7	#NAME?	0.00130067	0.217105	0.307391	0.00603981	-0.50168	2.21898	['Q93009']	USP7
1078	sp|P37802|TAGL2_HUMAN	10	5	2.78615	0.00133513	0.67278	0.361484	0.00619171	0.896202	2.20819	['P37802']	TAGLN2
2127	sp|Q5XKP0|QIL1_HUMAN	3	2	#NAME?	0.00134726	0.400309	1.26724	0.00623985	-1.6625	2.20483	['Q5XKP0']	QIL1
508	sp|P05106|ITB3_HUMAN	2	2	#NAME?	0.00135792	0.234588	0.176999	0.00628105	0.406387	2.20197	['P05106']	ITGB3
1970	sp|Q15654|TRIP6_HUMAN	5	4	-2.46521	0.00136477	0.556781	0.324117	0.00630452	0.780597	2.20035	['Q15654']	TRIP6
2865	sp|Q9BVA1|TBB2B_HUMAN	19	6	5.29626	0.00138283	1.15719	0.850606	0.00637394	0.444058	2.19559	['Q9BVA1']	TUBB2B
1041	sp|P35527|K1C9_HUMAN	7	5	-0.547397	0.00138338	0.276779	0.570561	0.00637394	-1.04365	2.19559	['P35527']	KRT9
618	sp|P09960|LKHA4_HUMAN	6	5	-9.79589	0.00140802	0.665744	0.364969	0.00647907	0.867196	2.18849	['P09960']	LTA4H
2449	sp|Q8NFJ5|RAI3_HUMAN	3	2	-0.448001	0.00142249	0.62592	1.10502	0.00653718	-0.820028	2.18461	['Q8NFJ5']	GPRC5A
2618	sp|Q96A26|F162A_HUMAN	4	3	-16.9399	0.0014387	0.415662	0.740981	0.00660315	-0.834025	2.18025	['Q96A26']	FAM162A
1707	sp|Q12765|SCRN1_HUMAN	5	4	6.05856	0.00148721	0.894609	0.504621	0.00681702	0.826058	2.16641	['Q12765']	SCRN1
722	sp|P14923|PLAK_HUMAN	13	7	-1.52518	0.00152701	0.317517	0.558967	0.00699042	-0.815928	2.1555	['P14923']	JUP
816	sp|P20674|COX5A_HUMAN	5	2	#NAME?	0.00154311	0.204596	1.6471	0.00705508	-3.00908	2.1515	['P20674']	COX5A
1216	sp|P49721|PSB2_HUMAN	6	3	-21.4054	0.00154543	1.1697	0.877766	0.00705662	0.414232	2.1514	['P49721']	PSMB2
856	sp|P23246|SFPQ_HUMAN	18	6	-4.40393	0.00155458	0.900717	1.11251	0.00708929	-0.304675	2.1494	['P23246']	SFPQ
3412	sp|Q9Y265|RUVB1_HUMAN	14	4	-31.7759	0.00156648	1.09522	0.44531	0.00713439	1.29835	2.14664	['Q9Y265']	RUVBL1
553	sp|P07437|TBB5_HUMAN	19	7	5.5264	0.00159794	1.18888	0.835077	0.00726838	0.509619	2.13856	['P07437']	TUBB
1691	sp|Q08J23|NSUN2_HUMAN	7	4	#NAME?	0.00161933	0.561264	0.366688	0.00735628	0.614128	2.13334	['Q08J23']	NSUN2
355	sp|O94788|AL1A2_HUMAN	3	2	-6.72724	0.00162279	1.27677	0.758125	0.00736257	0.751987	2.13297	['O94788']	ALDH1A2
212	sp|O43837|IDH3B_HUMAN	14	4	0.451825	0.00162672	0.825495	1.19934	0.00736572	-0.538906	2.13278	['O43837']	IDH3B
1756	sp|Q13185|CBX3_HUMAN	9	4	-4.5616	0.00162762	0.885749	0.619454	0.00736572	0.5159	2.13278	['Q13185']	CBX3
705	sp|P13987|CD59_HUMAN	4	2	-8.26283	0.00168596	0.902272	1.09734	0.00762004	-0.282376	2.11804	['P13987']	CD59
1754	sp|Q13162|PRDX4_HUMAN	12	7	-7.08156	0.00169297	0.426023	1.1992	0.00764199	-1.49307	2.11679	['Q13162']	PRDX4
825	sp|P21108|PRPS3_HUMAN	4	3	-2.91441	0.00169805	0.775895	0.353047	0.00765429	1.136	2.1161	['P21108']	PRPS1L1
152	sp|O43143|DHX15_HUMAN	27	11	-9.87213	0.0017	0.540831	0.553685	0.00765429	-0.0338885	2.1161	['O43143']	DHX15
219	sp|O60220|TIM8A_HUMAN	4	2	#NAME?	0.00170953	0.19167	1.12999	0.00768746	-2.55962	2.11422	['O60220']	TIMM8A
45	sp|O00295|TULP2_HUMAN	2	2	#NAME?	0.00173198	0.325895	0.325895	0.00777861	6.66134e-16	2.1091	['O00295']	TULP2
1058	sp|P35908|K22E_HUMAN	9	4	-26.971	0.00173732	0.170781	0.62636	0.00779273	-1.87484	2.10831	['P35908']	KRT2
3234	sp|Q9P0K7|RAI14_HUMAN	10	5	-3.36741	0.00178775	0.374193	0.650129	0.00800885	-0.796944	2.09643	['Q9P0K7']	RAI14
989	sp|P31040|SDHA_HUMAN	24	10	-41.2002	0.00179316	0.873407	1.16067	0.00802299	-0.410236	2.09566	['P31040']	SDHA
261	sp|O60934|NBN_HUMAN	4	3	-8.53197	0.00181359	0.140974	0.237339	0.00809792	-0.751517	2.09163	['O60934']	NBN
2910	sp|Q9BYK8|HELZ2_HUMAN	13	3	-12.7456	0.00181446	0.473752	0.268248	0.00809792	0.820567	2.09163	['Q9BYK8']	HELZ2
1653	sp|Q05519|SRS11_HUMAN	6	3	-10.3372	0.00182749	1.12468	0.476611	0.00814583	1.23863	2.08906	['Q05519']	SRSF11
2317	sp|Q8IUR7|ARMC8_HUMAN	3	3	#NAME?	0.00184393	0.506384	0.430644	0.00820883	0.233737	2.08572	['Q8IUR7']	ARMC8
1558	sp|P82675|RT05_HUMAN	5	3	-29.3899	0.00186461	0.407324	0.31078	0.00829053	0.390284	2.08142	['P82675']	MRPS5
1228	sp|P49915|GUAA_HUMAN	8	3	0.423394	0.00186769	0.479433	0.238178	0.00829385	1.00929	2.08124	['P49915']	GMPS
3113	sp|Q9NRF8|PYRG2_HUMAN	5	3	-11.6526	0.00187954	0.563642	0.317845	0.00832956	0.826458	2.07938	['Q9NRF8']	CTPS2
1890	sp|Q14696|MESD_HUMAN	12	7	-3.2414	0.00188042	0.122124	0.304094	0.00832956	-1.31617	2.07938	['Q14696']	MESDC2
1327	sp|P54652|HSP72_HUMAN	13	6	-3.13096	0.00190391	1.1407	0.865744	0.00842313	0.397911	2.07453	['P54652']	HSPA2
803	sp|P19623|SPEE_HUMAN	2	2	-0.461888	0.00190973	1.097	0.470606	0.00843838	1.22097	2.07374	['P19623']	SRM
1149	sp|P46013|KI67_HUMAN	62	23	2.59657	0.00192172	0.614739	0.314089	0.00848086	0.968803	2.07156	['P46013']	MKI67
1022	sp|P34931|HS71L_HUMAN	13	3	-131.927	0.00193246	0.09124	0.0830401	0.00851765	0.135858	2.06968	['P34931']	HSPA1L
2091	sp|Q5K651|SAMD9_HUMAN	9	3	#NAME?	0.00195387	0.503297	0.257848	0.0086014	0.964888	2.06543	['Q5K651']	SAMD9
1362	sp|P56377|AP1S2_HUMAN	3	3	#NAME?	0.00197837	0.404702	0.477765	0.00869849	-0.239438	2.06056	['P56377']	AP1S2
1908	sp|Q15008|PSMD6_HUMAN	15	6	-6.63739	0.00198578	0.463075	0.256384	0.00872025	0.852941	2.05947	['Q15008']	PSMD6
725	sp|P15144|AMPN_HUMAN	21	9	-5.46405	0.00201003	0.268474	0.474773	0.00881589	-0.822452	2.05473	['P15144']	ANPEP
2299	sp|Q86W92|LIPB1_HUMAN	7	6	-42.5689	0.0020129	0.379244	0.362854	0.00881758	0.0637376	2.05465	['Q86W92']	PPFIBP1
1871	sp|Q14534|ERG1_HUMAN	3	2	#NAME?	0.00202205	0.287537	0.58677	0.00884676	-1.02905	2.05322	['Q14534']	SQLE
396	sp|O95292|VAPB_HUMAN	8	5	-5.36913	0.00202967	0.316821	1.17743	0.0088692	-1.89391	2.05212	['O95292']	VAPB
3023	sp|Q9H8H0|NOL11_HUMAN	6	5	#NAME?	0.00203266	0.276868	0.319675	0.00887137	-0.207408	2.05201	['Q9H8H0']	NOL11
1066	sp|P36551|HEM6_HUMAN	11	6	-51.4173	0.00204527	0.900312	0.658476	0.00891548	0.451295	2.04986	['P36551']	CPOX
3127	sp|Q9NS69|TOM22_HUMAN	4	2	#NAME?	0.0020546	0.877773	1.13925	0.00894517	-0.37616	2.04841	['Q9NS69']	TOMM22
1237	sp|P50416|CPT1A_HUMAN	17	4	-5.63292	0.00210202	0.875317	1.12857	0.00914045	-0.366622	2.03903	['P50416']	CPT1A
2904	sp|Q9BYD1|RM13_HUMAN	10	5	-7.09529	0.00213806	0.335427	0.620519	0.00928401	-0.887478	2.03226	['Q9BYD1']	MRPL13
3459	sp|Q9Y3A5|SBDS_HUMAN	2	2	#NAME?	0.00214026	0.621542	0.218902	0.00928401	1.50557	2.03226	['Q9Y3A5']	SBDS
2820	sp|Q9BQP7|MGME1_HUMAN	5	3	#NAME?	0.00217431	0.541422	0.463546	0.00942026	0.224041	2.02594	['Q9BQP7']	MGME1
2246	sp|Q7RTV0|PHF5A_HUMAN	5	4	-15.8568	0.00218233	0.614805	1.05351	0.00943468	-0.777009	2.02527	['Q7RTV0']	PHF5A
1680	sp|Q08170|SRSF4_HUMAN	7	3	-5.94633	0.00218295	0.837577	0.681705	0.00943468	0.297074	2.02527	['Q08170']	SRSF4
1221	sp|P49756|RBM25_HUMAN	19	6	-32.6944	0.00223082	1.03042	0.55178	0.00962987	0.901062	2.01638	['P49756']	RBM25
3211	sp|Q9NYU2|UGGG1_HUMAN	29	11	-31.895	0.0022385	0.198487	0.194898	0.00964477	0.0263266	2.01571	['Q9NYU2']	UGGT1
1743	sp|Q13045|FLII_HUMAN	14	6	#NAME?	0.00223969	0.635676	0.306438	0.00964477	1.0527	2.01571	['Q13045']	FLII
534	sp|P06737|PYGL_HUMAN	8	6	-2.78915	0.00226987	0.656671	0.424063	0.0097629	0.630892	2.01042	['P06737']	PYGL
223	sp|O60264|SMCA5_HUMAN	17	6	-22.8657	0.0022796	0.538618	0.421942	0.00979293	0.35222	2.00909	['O60264']	SMARCA5
2684	sp|Q96GM8|TOE1_HUMAN	2	2	#NAME?	0.00229537	1.04043	0.498378	0.00984878	1.06187	2.00662	['Q96GM8']	TOE1
3422	sp|Q9Y2B0|CNPY2_HUMAN	10	4	-15.517	0.00230138	1.0819	0.280288	0.00986264	1.94859	2.00601	['Q9Y2B0']	CNPY2
2797	sp|Q99757|THIOM_HUMAN	4	3	#NAME?	0.00231711	0.655167	1.12949	0.00991812	-0.785743	2.00357	['Q99757']	TXN2
2218	sp|Q71DI3|H32_HUMAN	9	4	-5.31538	0.00233912	1.29621	0.75325	0.00996241	0.783098	2.00164	['Q71DI3']	HIST2H3A
2160	sp|Q6NXT2|H3C_HUMAN	5	4	-2.2425	0.00233912	1.29711	0.752773	0.00996241	0.785014	2.00164	['Q6NXT2']	H3F3C
1536	sp|P68431|H31_HUMAN	9	4	-5.95626	0.00233912	1.29706	0.752808	0.00996241	0.784891	2.00164	['P68431']	HIST1H3A
1578	sp|P84243|H33_HUMAN	7	4	-3.9114	0.00233912	1.29713	0.752747	0.00996241	0.78509	2.00164	['P84243']	H3F3A
1158	sp|P46776|RL27A_HUMAN	4	3	#NAME?	0.00234232	1.2632	0.784965	0.00996241	0.686385	2.00164	['P46776']	RPL27A
189	sp|O43663|PRC1_HUMAN	3	2	#NAME?	0.00234426	0.592596	0.305196	0.00996241	0.957316	2.00164	['O43663']	PRC1
1791	sp|Q13488|VPP3_HUMAN	14	4	-6.66736	0.00235913	0.0944392	0.283554	0.0100136	-1.58616	1.99941	['Q13488']	TCIRG1
402	sp|O95336|6PGL_HUMAN	2	2	-72.8262	0.00237295	0.64318	0.285994	0.0100603	1.16924	1.99739	['O95336']	PGLS
2192	sp|Q6UW63|KDEL1_HUMAN	12	5	#NAME?	0.00240949	0.569622	0.630059	0.0101961	-0.145483	1.99157	['Q6UW63']	KDELC1
1880	sp|Q14667|K0100_HUMAN	3	3	#NAME?	0.00241072	0.474437	0.504021	0.0101961	-0.0872663	1.99157	['Q14667']	KIAA0100
1847	sp|Q14160|SCRIB_HUMAN	12	9	#NAME?	0.00241883	0.398493	0.486491	0.0102183	-0.287859	1.99062	['Q14160']	SCRIB
992	sp|P31350|RIR2_HUMAN	3	2	-4.84925	0.00242216	0.765014	0.202622	0.0102202	1.91669	1.99054	['P31350']	RRM2
2932	sp|Q9C0C2|TB182_HUMAN	16	10	-11.3434	0.00244838	0.522894	0.507138	0.0103186	0.0441386	1.98638	['Q9C0C2']	TNKS1BP1
1311	sp|P53634|CATC_HUMAN	10	4	-10.9263	0.00249312	0.555804	1.11392	0.0104947	-1.003	1.97903	['P53634']	CTSC
3146	sp|Q9NUP9|LIN7C_HUMAN	7	5	-8.10653	0.0025049	0.490307	0.754107	0.0105318	-0.621084	1.9775	['Q9NUP9']	LIN7C
1332	sp|P54760|EPHB4_HUMAN	4	2	#NAME?	0.0025109	0.272373	0.190357	0.0105446	0.516878	1.97697	['P54760']	EPHB4
2482	sp|Q8TD26|CHD6_HUMAN	2	2	#NAME?	0.00251635	0.308399	0.445948	0.010555	-0.532076	1.97654	['Q8TD26']	CHD6
3222	sp|Q9NZQ7|PD1L1_HUMAN	2	2	#NAME?	0.0025298	0.756999	0.364844	0.0105989	1.05301	1.97474	['Q9NZQ7']	CD274
577	sp|P08240|SRPR_HUMAN	12	5	-7.89745	0.00254026	0.270125	0.50614	0.0106302	-0.905912	1.97346	['P08240']	SRPR
976	sp|P30511|HLAF_HUMAN	3	2	-12.9367	0.00256825	0.671298	0.264527	0.0107347	1.34354	1.96921	['P30511']	HLA-F
2070	sp|Q5BKZ1|ZN326_HUMAN	8	5	#NAME?	0.00258725	0.432848	0.814448	0.0108015	-0.911961	1.96652	['Q5BKZ1']	ZNF326
1051	sp|P35613|BASI_HUMAN	9	4	-9.18772	0.00259424	0.768531	1.25124	0.0108179	-0.703183	1.96586	['P35613']	BSG
2442	sp|Q8NF91|SYNE1_HUMAN	7	3	-6.63404	0.00260481	0.533593	0.26796	0.0108493	0.993726	1.9646	['Q8NF91']	SYNE1
1451	sp|P62195|PRS8_HUMAN	16	10	#NAME?	0.00261018	0.476162	0.354549	0.010859	0.425467	1.96421	['P62195']	PSMC5
640	sp|P10809|CH60_HUMAN	35	16	-4.57453	0.00262003	0.937825	1.0663	0.0108872	-0.18522	1.96308	['P10809']	HSPD1
1145	sp|P45880|VDAC2_HUMAN	11	4	4.74477	0.00266053	1.11571	0.896294	0.0110426	0.315913	1.95693	['P45880']	VDAC2
2145	sp|Q6IBS0|TWF2_HUMAN	6	5	-4.82638	0.00266825	0.692168	0.368607	0.0110617	0.90904	1.95618	['Q6IBS0']	TWF2
1384	sp|P59998|ARPC4_HUMAN	6	3	-34.3976	0.00268322	1.19914	0.524449	0.0111109	1.19313	1.95425	['P59998']	ARPC4
3208	sp|Q9NYL9|TMOD3_HUMAN	14	5	-11.961	0.00269305	0.284136	0.503865	0.0111386	-0.826455	1.95317	['Q9NYL9']	TMOD3
136	sp|O15270|SPTC2_HUMAN	5	3	-11.3645	0.0027277	0.471244	0.356012	0.0112688	0.404547	1.94812	['O15270']	SPTLC2
1086	sp|P38606|VATA_HUMAN	17	8	-2.62181	0.00273428	0.882882	1.11966	0.0112824	-0.342762	1.9476	['P38606']	ATP6V1A
2784	sp|Q99614|TTC1_HUMAN	3	3	#NAME?	0.00273735	0.521518	0.462266	0.0112824	0.173995	1.9476	['Q99614']	TTC1
1426	sp|P61586|RHOA_HUMAN	9	6	#NAME?	0.00274291	0.471173	0.45496	0.0112923	0.0505186	1.94722	['P61586']	RHOA
2568	sp|Q92791|SC65_HUMAN	4	2	-3.9506	0.00274848	0.343088	1.12599	0.0113021	-1.71455	1.94684	['Q92791']	LEPREL4
2802	sp|Q99829|CPNE1_HUMAN	4	3	-17.984	0.00277278	0.487332	0.261605	0.0113889	0.897515	1.94352	['Q99829']	CPNE1
1834	sp|Q14108|SCRB2_HUMAN	13	5	-4.26901	0.00277631	0.421573	1.06741	0.0113902	-1.34026	1.94347	['Q14108']	SCARB2
985	sp|P30679|GNA15_HUMAN	2	2	#NAME?	0.00278405	0.605099	0.516731	0.0114088	0.227757	1.94276	['P30679']	GNA15
3380	sp|Q9UNF1|MAGD2_HUMAN	8	4	-6.53103	0.00280585	0.569611	0.405723	0.0114849	0.489483	1.93987	['Q9UNF1']	MAGED2
2927	sp|Q9C002|NMES1_HUMAN	3	3	-20.0544	0.00281756	0.605152	0.28609	0.0115196	1.08083	1.93856	['Q9C002']	NMES1
2053	sp|Q53G44|IF44L_HUMAN	4	2	-5.89107	0.00288013	0.610177	0.249048	0.0117516	1.29281	1.9299	['Q53G44']	IFI44L
1803	sp|Q13564|ULA1_HUMAN	3	3	-9.99134	0.00288092	0.604574	0.353857	0.0117516	0.772751	1.9299	['Q13564']	NAE1
393	sp|O95239|KIF4A_HUMAN	17	5	-13.2519	0.00289599	0.562635	0.309578	0.0117996	0.861898	1.92813	['O95239']	KIF4A
701	sp|P13807|GYS1_HUMAN	9	5	#NAME?	0.00290897	0.485362	0.358506	0.0118389	0.437064	1.92669	['P13807']	GYS1
719	sp|P14854|CX6B1_HUMAN	6	4	-1.12672	0.00295087	0.870902	1.15489	0.011987	-0.407169	1.92129	['P14854']	COX6B1
2516	sp|Q8WVX9|FACR1_HUMAN	2	2	#NAME?	0.00295211	0.382236	0.648708	0.011987	-0.763105	1.92129	['Q8WVX9']	FAR1
193	sp|O43678|NDUA2_HUMAN	4	3	-3.64634	0.0029667	0.751126	1.07147	0.0120325	-0.512463	1.91964	['O43678']	NDUFA2
3374	sp|Q9UMX5|NENF_HUMAN	7	2	-115.345	0.00299809	1.42401	0.659808	0.0121414	1.10984	1.91573	['Q9UMX5']	NENF
2504	sp|Q8WUM4|PDC6I_HUMAN	9	4	0.651527	0.00300037	0.508698	0.373488	0.0121414	0.445746	1.91573	['Q8WUM4']	PDCD6IP
93	sp|O14787|TNPO2_HUMAN	4	2	#NAME?	0.00301968	0.323406	0.568668	0.0122057	-0.81424	1.91344	['O14787']	TNPO2
389	sp|O95202|LETM1_HUMAN	26	11	-3.19284	0.00305532	0.419953	1.04455	0.0123357	-1.31458	1.90884	['O95202']	LETM1
3245	sp|Q9P273|TEN3_HUMAN	2	2	3.86166	0.00307145	0.41864	0.669956	0.0123821	-0.678355	1.90721	['Q9P273']	TENM3
283	sp|O75367|H2AY_HUMAN	19	8	-14.6285	0.00307377	0.306572	1.06479	0.0123821	-1.79627	1.90721	['O75367']	H2AFY
1568	sp|P83731|RL24_HUMAN	4	3	-0.500496	0.00308369	1.19321	0.819874	0.012408	0.541373	1.9063	['P83731']	RPL24
3545	sp|Q9Y6H1|CHCH2_HUMAN	2	2	-0.00553255	0.00310008	0.794572	1.22844	0.0124599	-0.628578	1.90449	['Q9Y6H1']	CHCHD2
3367	sp|Q9UM00|TMCO1_HUMAN	3	2	-8.60045	0.00310665	0.747483	1.38442	0.0124722	-0.889175	1.90406	['Q9UM00']	TMCO1
2055	sp|Q53GS7|GLE1_HUMAN	2	2	#NAME?	0.0031465	0.540901	0.420773	0.0126179	0.362321	1.89901	['Q53GS7']	GLE1
516	sp|P05386|RLA1_HUMAN	3	3	#NAME?	0.00315165	1.01931	0.981751	0.0126243	0.0541652	1.89879	['P05386']	RPLP1
2437	sp|Q8NEM2|SHCBP_HUMAN	4	2	#NAME?	0.00322775	0.521267	0.271719	0.0129146	0.939906	1.88892	['Q8NEM2']	SHCBP1
1480	sp|P62753|RS6_HUMAN	7	2	6.02291	0.00324483	0.890399	1.12309	0.0129684	-0.334953	1.88711	['P62753']	RPS6
55	sp|O00469|PLOD2_HUMAN	24	16	-18.7975	0.00326783	0.0849483	0.185299	0.0130456	-1.1252	1.88453	['O00469']	PLOD2
1489	sp|P62854|RS26_HUMAN	4	3	#NAME?	0.00329255	1.13493	0.278442	0.0131296	2.02716	1.88175	['P62854']	RPS26
1460	sp|P62277|RS13_HUMAN	6	6	#NAME?	0.00331952	1.26744	0.804561	0.0132135	0.655643	1.87898	['P62277']	RPS13
28	sp|O00159|MYO1C_HUMAN	33	16	#NAME?	0.00332102	0.333087	0.501493	0.0132135	-0.59033	1.87898	['O00159']	MYO1C
963	sp|P30085|KCY_HUMAN	3	2	#NAME?	0.00333705	0.50852	0.476444	0.0132624	0.0940004	1.87738	['P30085']	CMPK1
1984	sp|Q15907|RB11B_HUMAN	11	6	1.81331	0.00341825	0.887803	1.12365	0.0135514	-0.339875	1.86802	['Q15907']	RAB11B
1472	sp|P62491|RB11A_HUMAN	9	6	2.99759	0.00341825	0.887572	1.12414	0.0135514	-0.340885	1.86802	['P62491']	RAB11A
1518	sp|P63218|GBG5_HUMAN	2	2	#NAME?	0.00342118	0.960619	0.153854	0.0135514	2.6424	1.86802	['P63218']	GNG5
1151	sp|P46063|RECQ1_HUMAN	16	15	-0.370648	0.00354559	0.578702	0.353333	0.0140286	0.711792	1.85299	['P46063']	RECQL
925	sp|P27824|CALX_HUMAN	29	10	-6.54306	0.00355228	0.86601	0.481516	0.0140394	0.8468	1.85265	['P27824']	CANX
1307	sp|P53582|MAP11_HUMAN	3	2	#NAME?	0.00356148	0.635727	0.371828	0.0140601	0.773769	1.85201	['P53582']	METAP1
76	sp|O14561|ACPM_HUMAN	3	2	#NAME?	0.00356805	0.849101	1.23023	0.0140704	-0.534915	1.85169	['O14561']	NDUFAB1
966	sp|P30153|2AAA_HUMAN	16	6	-15.4583	0.00357753	0.267313	0.280213	0.0140922	-0.0679946	1.85102	['P30153']	PPP2R1A
2903	sp|Q9BYC9|RM20_HUMAN	5	4	#NAME?	0.00361714	0.506095	0.566676	0.0142325	-0.163117	1.84672	['Q9BYC9']	MRPL20
1632	sp|Q03135|CAV1_HUMAN	11	7	-0.641012	0.00363296	0.344865	1.10042	0.0142789	-1.67394	1.8453	['Q03135']	CAV1
1915	sp|Q15031|SYLM_HUMAN	3	2	#NAME?	0.00364927	0.490375	0.76977	0.0143272	-0.650542	1.84384	['Q15031']	LARS2
1306	sp|P53396|ACLY_HUMAN	25	15	-14.6594	0.00373096	0.311849	0.258344	0.0146318	0.271554	1.8347	['P53396']	ACLY
3544	sp|Q9Y6G9|DC1L1_HUMAN	2	2	#NAME?	0.00373729	0.61802	0.416874	0.0146405	0.568042	1.83445	['Q9Y6G9']	DYNC1LI1
1025	sp|P35080|PROF2_HUMAN	3	2	1.45596	0.00374212	0.790707	0.447625	0.0146433	0.820853	1.83436	['P35080']	PFN2
1375	sp|P57740|NU107_HUMAN	10	4	-17.8931	0.00375663	0.434575	0.584093	0.0146839	-0.426593	1.83316	['P57740']	NUP107
1980	sp|Q15800|MSMO1_HUMAN	3	2	#NAME?	0.00379538	0.273311	0.682298	0.0148191	-1.31986	1.82918	['Q15800']	MSMO1
2177	sp|Q6PI48|SYDM_HUMAN	9	5	-8.8083	0.00387416	0.481287	0.663604	0.0151101	-0.463424	1.82073	['Q6PI48']	DARS2
449	sp|P00374|DYR_HUMAN	2	2	#NAME?	0.00390882	0.501928	0.475864	0.0152285	0.0769326	1.81734	['P00374']	DHFR
3472	sp|Q9Y3D9|RT23_HUMAN	5	3	-10.5477	0.00392465	0.481111	0.68724	0.015269	-0.514444	1.81619	['Q9Y3D9']	MRPS23
3137	sp|Q9NTK5|OLA1_HUMAN	6	4	#NAME?	0.00392778	0.583009	0.33665	0.015269	0.792266	1.81619	['Q9NTK5']	OLA1
1245	sp|P50748|KNTC1_HUMAN	2	2	#NAME?	0.00393682	0.40223	0.457658	0.0152874	-0.186252	1.81567	['P50748']	KNTC1
3034	sp|Q9H9B4|SFXN1_HUMAN	10	4	-2.93652	0.00397627	0.820567	1.19854	0.0154238	-0.546589	1.81181	['Q9H9B4']	SFXN1
1832	sp|Q14061|COX17_HUMAN	3	2	-3.95119	0.00403759	1.09092	0.912242	0.0156445	0.258061	1.80564	['Q14061']	COX17
2473	sp|Q8TCB0|IFI44_HUMAN	2	2	#NAME?	0.00404547	0.640249	0.327999	0.015658	0.964941	1.80526	['Q8TCB0']	IFI44
686	sp|P13489|RINI_HUMAN	8	4	-7.59529	0.00406504	0.731919	0.450292	0.0157167	0.700824	1.80364	['P13489']	RNH1
1253	sp|P50995|ANX11_HUMAN	4	3	#NAME?	0.00409395	0.530751	0.21595	0.0158113	1.29734	1.80103	['P50995']	ANXA11
1029	sp|P35232|PHB_HUMAN	17	8	-21.8106	0.00410655	0.897398	1.11047	0.0158427	-0.307355	1.80017	['P35232']	PHB
1512	sp|P63151|2ABA_HUMAN	2	2	#NAME?	0.00414169	0.651301	0.394486	0.015961	0.723349	1.79694	['P63151']	PPP2R2A
2830	sp|Q9BS26|ERP44_HUMAN	16	11	-21.9413	0.00417846	0.472339	0.373256	0.0160853	0.339656	1.79357	['Q9BS26']	ERP44
1026	sp|P35221|CTNA1_HUMAN	40	15	-3.62319	0.00418444	0.332823	0.585009	0.0160909	-0.813701	1.79342	['P35221']	CTNNA1
3088	sp|Q9NQ86|TRI36_HUMAN	3	2	#NAME?	0.0042174	0.19125	1.23327	0.0162001	-2.68895	1.79048	['Q9NQ86']	TRIM36
1266	sp|P51572|BAP31_HUMAN	10	5	-16.5145	0.00422874	0.774105	1.29182	0.0162261	-0.738799	1.78979	['P51572']	BCAP31
1117	sp|P42126|ECI1_HUMAN	5	3	-6.33724	0.00427294	0.858208	1.16298	0.0163781	-0.438423	1.78574	['P42126']	ECI1
409	sp|O95453|PARN_HUMAN	3	2	#NAME?	0.00428049	0.293668	0.547912	0.0163893	-0.899757	1.78544	['O95453']	PARN
3122	sp|Q9NRX1|PNO1_HUMAN	5	3	#NAME?	0.00429353	0.396776	0.193107	0.0164216	1.03892	1.78458	['Q9NRX1']	PNO1
2920	sp|Q9BZF9|UACA_HUMAN	14	6	4.18755	0.00431391	0.14536	0.269615	0.0164818	-0.891273	1.78299	['Q9BZF9']	UACA
2789	sp|Q99643|C560_HUMAN	2	2	#NAME?	0.00435826	0.387033	1.17407	0.0166334	-1.601	1.77902	['Q99643']	SDHC
2630	sp|Q96B97|SH3K1_HUMAN	5	4	-2.56244	0.00436769	0.740015	0.43882	0.0166515	0.753924	1.77855	['Q96B97']	SH3KBP1
688	sp|P13611|CSPG2_HUMAN	2	2	#NAME?	0.00438135	0.348118	0.294813	0.0166734	0.239774	1.77798	['P13611']	VCAN
1949	sp|Q15388|TOM20_HUMAN	2	2	#NAME?	0.0043828	0.491548	1.10554	0.0166734	-1.16935	1.77798	['Q15388']	TOMM20
539	sp|P06865|HEXA_HUMAN	11	5	-4.9772	0.00444133	0.478695	1.07116	0.016878	-1.162	1.77268	['P06865']	HEXA
2499	sp|Q8WTT2|NOC3L_HUMAN	7	4	-8.66399	0.00445363	0.518468	0.447234	0.0169067	0.213224	1.77194	['Q8WTT2']	NOC3L
299	sp|O75487|GPC4_HUMAN	9	6	-3.52363	0.00448684	0.356421	0.6199	0.0170146	-0.79845	1.76918	['O75487']	GPC4
3257	sp|Q9P2R3|ANFY1_HUMAN	12	6	-4.32602	0.00457324	0.673848	0.414157	0.0173238	0.702245	1.76136	['Q9P2R3']	ANKFY1
306	sp|O75530|EED_HUMAN	2	2	#NAME?	0.00461867	0.677964	0.417279	0.0174773	0.700196	1.75753	['O75530']	EED
1650	sp|Q05048|CSTF1_HUMAN	5	3	-9.36378	0.00465156	0.546379	0.505883	0.017583	0.111098	1.75491	['Q05048']	CSTF1
1108	sp|P41219|PERI_HUMAN	7	4	-6.09394	0.0046983	0.810167	1.23431	0.0177408	-0.607419	1.75103	['P41219']	PRPH
1069	sp|P36871|PGM1_HUMAN	9	5	-3.99414	0.00473946	0.427379	0.240126	0.0178591	0.831724	1.74814	['P36871']	PGM1
1062	sp|P36406|TRI23_HUMAN	2	2	#NAME?	0.00473965	0.462282	0.485122	0.0178591	-0.0695721	1.74814	['P36406']	TRIM23
342	sp|O75954|TSN9_HUMAN	2	2	#NAME?	0.0048096	0.343054	0.389598	0.0180844	-0.183549	1.7427	['O75954']	TSPAN9
942	sp|P29279|CTGF_HUMAN	8	3	-21.3088	0.00480963	0.167595	0.330919	0.0180844	-0.981495	1.7427	['P29279']	CTGF
859	sp|P23368|MAOM_HUMAN	18	11	-13.7693	0.00481566	0.569757	0.454756	0.0180879	0.325255	1.74261	['P23368']	ME2
753	sp|P16949|STMN1_HUMAN	4	3	1.6564	0.00482881	0.773507	0.358715	0.0181182	1.10858	1.74188	['P16949']	STMN1
3287	sp|Q9UDY2|ZO2_HUMAN	4	3	-13.294	0.00489253	0.510279	0.406953	0.018338	0.326424	1.73665	['Q9UDY2']	TJP2
1412	sp|P61163|ACTZ_HUMAN	8	3	#NAME?	0.00490265	0.624982	0.475864	0.0183565	0.393265	1.73621	['P61163']	ACTR1A
2430	sp|Q8NCC3|PAG15_HUMAN	2	2	#NAME?	0.00495868	0.356631	0.56718	0.0185468	-0.669372	1.73173	['Q8NCC3']	PLA2G15
110	sp|O15031|PLXB2_HUMAN	17	6	-9.00707	0.00501341	0.269418	0.554091	0.0187318	-1.04028	1.72742	['O15031']	PLXNB2
2258	sp|Q7Z434|MAVS_HUMAN	11	7	-62.7462	0.00502419	0.28322	0.499868	0.0187506	-0.819624	1.72699	['Q7Z434']	MAVS
3364	sp|Q9ULV4|COR1C_HUMAN	18	12	#NAME?	0.00502897	0.394926	0.51007	0.0187506	-0.369112	1.72699	['Q9ULV4']	CORO1C
1550	sp|P78527|PRKDC_HUMAN	115	41	-9.324	0.00504214	0.429149	0.430352	0.0187626	-0.0040387	1.72671	['P78527']	PRKDC
3010	sp|Q9H6S0|YTDC2_HUMAN	2	2	#NAME?	0.00504274	0.265109	0.541328	0.0187626	-1.02992	1.72671	['Q9H6S0']	YTHDC2
2238	sp|Q7L5N7|PCAT2_HUMAN	17	8	3.07579	0.00505347	0.588012	0.804214	0.0187828	-0.451736	1.72624	['Q7L5N7']	LPCAT2
3528	sp|Q9Y624|JAM1_HUMAN	3	2	-1.45261	0.00507064	0.648212	1.07324	0.018827	-0.727437	1.72522	['Q9Y624']	F11R
1891	sp|Q14697|GANAB_HUMAN	39	14	-6.42353	0.00517192	1.05168	0.949342	0.019183	0.147693	1.71708	['Q14697']	GANAB
2694	sp|Q96HS1|PGAM5_HUMAN	8	4	-8.84052	0.00521555	0.98513	0.449507	0.0193247	1.13197	1.71389	['Q96HS1']	PGAM5
2689	sp|Q96HC4|PDLI5_HUMAN	6	5	0.986064	0.0052294	0.846256	0.526873	0.0193559	0.683639	1.71319	['Q96HC4']	PDLIM5
2693	sp|Q96HP0|DOCK6_HUMAN	2	2	0.473011	0.00527914	0.509697	0.958564	0.0195196	-0.911235	1.70953	['Q96HP0']	DOCK6
926	sp|P28062|PSB8_HUMAN	5	4	-1.2861	0.00529894	0.594469	0.317988	0.0195725	0.902628	1.70835	['P28062']	PSMB8
1099	sp|P40429|RL13A_HUMAN	6	4	-2.06519	0.00534583	1.0888	0.318627	0.0197252	1.7728	1.70498	['P40429']	RPL13A
1141	sp|P43490|NAMPT_HUMAN	10	6	-0.69446	0.00541822	0.55403	0.254334	0.0199716	1.12324	1.69959	['P43490']	NAMPT
429	sp|O95817|BAG3_HUMAN	9	4	0.088989	0.00543139	0.646098	0.659444	0.0199994	-0.0294987	1.69898	['O95817']	BAG3
357	sp|O94808|GFPT2_HUMAN	4	2	2.89611	0.00550488	1.21789	0.821094	0.0202491	0.568763	1.69359	['O94808']	GFPT2
876	sp|P24539|AT5F1_HUMAN	10	3	1.98264	0.00558661	0.311878	0.591066	0.0205126	-0.92234	1.68798	['P24539']	ATP5F1
276	sp|O75306|NDUS2_HUMAN	11	4	1.47296	0.00558989	0.52916	1.13701	0.0205126	-1.10347	1.68798	['O75306']	NDUFS2
908	sp|P26599|PTBP1_HUMAN	15	6	-21.334	0.00559382	1.06813	0.41908	0.0205126	1.34979	1.68798	['P26599']	PTBP1
37	sp|O00217|NDUS8_HUMAN	5	2	#NAME?	0.0056472	0.906303	1.11759	0.020687	-0.302323	1.6843	['O00217']	NDUFS8
289	sp|O75396|SC22B_HUMAN	9	6	#NAME?	0.00568863	0.248075	0.40249	0.0208173	-0.698175	1.68157	['O75396']	SEC22B
1825	sp|Q13885|TBB2A_HUMAN	19	5	4.59604	0.00570662	1.15566	0.858701	0.0208617	0.428483	1.68065	['Q13885']	TUBB2A
1317	sp|P53985|MOT1_HUMAN	5	3	-53.813	0.00573112	0.887641	1.11492	0.0209298	-0.328898	1.67924	['P53985']	SLC16A1
2895	sp|Q9BXW7|CECR5_HUMAN	7	7	#NAME?	0.00580828	0.263498	0.494797	0.0211898	-0.909044	1.67387	['Q9BXW7']	CECR5
2453	sp|Q8NG08|HELB_HUMAN	2	2	#NAME?	0.00581587	0.329591	0.120533	0.0211957	1.45125	1.67375	['Q8NG08']	HELB
181	sp|O43493|TGON2_HUMAN	5	2	-13.2645	0.00594526	0.886798	1.12797	0.0216451	-0.347049	1.66464	['O43493']	TGOLN2
2767	sp|Q99436|PSB7_HUMAN	5	4	-9.14181	0.00598158	0.402407	0.465089	0.0217551	-0.208851	1.66244	['Q99436']	PSMB7
1203	sp|P49368|TCPG_HUMAN	23	12	-10.3209	0.00600258	0.369915	0.577137	0.0218092	-0.641719	1.66136	['P49368']	CCT3
1159	sp|P46777|RL5_HUMAN	14	6	-12.664	0.0060399	0.378363	0.492102	0.0219224	-0.379188	1.65911	['P46777']	RPL5
613	sp|P09669|COX6C_HUMAN	3	2	-7.92422	0.00607002	0.640001	1.48724	0.0220092	-1.2165	1.6574	['P09669']	COX6C
3499	sp|Q9Y512|SAM50_HUMAN	15	10	-5.79591	0.00614998	0.416064	0.633472	0.0222764	-0.606475	1.65215	['Q9Y512']	SAMM50
1096	sp|P40222|TXLNA_HUMAN	6	4	-10.1959	0.00626603	0.510368	0.342111	0.0226737	0.577076	1.64448	['P40222']	TXLNA
293	sp|O75436|VP26A_HUMAN	3	2	#NAME?	0.00633154	0.564607	0.530567	0.0228875	0.0897124	1.6404	['O75436']	VPS26A
2611	sp|Q969V3|NCLN_HUMAN	11	8	#NAME?	0.00634298	0.349137	0.560729	0.0229056	-0.68351	1.64006	['Q969V3']	NCLN
3529	sp|Q9Y639|NPTN_HUMAN	8	6	-6.60749	0.00641794	0.835733	1.17422	0.0231527	-0.490584	1.6354	['Q9Y639']	NPTN
2209	sp|Q6ZS81|WDFY4_HUMAN	2	2	-7.19286	0.00642883	0.449755	0.18938	0.0231685	1.24785	1.6351	['Q6ZS81']	WDFY4
2374	sp|Q8N128|F177A_HUMAN	2	2	#NAME?	0.00653052	0.580537	1.04586	0.0235002	-0.849233	1.62893	['Q8N128']	FAM177A1
3389	sp|Q9UNW1|MINP1_HUMAN	6	2	2.18684	0.00653408	0.905462	1.10441	0.0235002	-0.286549	1.62893	['Q9UNW1']	MINPP1
1478	sp|P62745|RHOB_HUMAN	2	2	#NAME?	0.00668393	0.347564	0.69026	0.0240149	-0.989862	1.61952	['P62745']	RHOB
2584	sp|Q92901|RL3L_HUMAN	3	2	#NAME?	0.00669687	0.573124	0.932224	0.0240371	-0.70183	1.61912	['Q92901']	RPL3L
545	sp|P07197|NFM_HUMAN	3	3	#NAME?	0.00676323	0.178431	0.264888	0.0242264	-0.570015	1.61571	['P07197']	NEFM
1993	sp|Q16352|AINX_HUMAN	3	3	#NAME?	0.00676323	0.152834	0.45942	0.0242264	-1.58785	1.61571	['Q16352']	INA
3249	sp|Q9P2B2|FPRP_HUMAN	11	4	-7.50707	0.00680062	0.379947	0.637698	0.0243358	-0.747075	1.61375	['Q9P2B2']	PTGFRN
3230	sp|Q9P035|HACD3_HUMAN	7	5	#NAME?	0.00683675	0.358746	1.08971	0.0244405	-1.60291	1.61189	['Q9P035']	PTPLAD1
1330	sp|P54725|RD23A_HUMAN	5	2	#NAME?	0.00687397	0.343637	0.526817	0.0245489	-0.616418	1.60997	['P54725']	RAD23A
344	sp|O75964|ATP5L_HUMAN	4	2	-3.55247	0.00688412	0.829002	1.23318	0.0245605	-0.572934	1.60976	['O75964']	ATP5L
3105	sp|Q9NR30|DDX21_HUMAN	25	20	-7.89474	0.00693947	0.510385	0.419383	0.0247332	0.283319	1.60672	['Q9NR30']	DDX21
864	sp|P23458|JAK1_HUMAN	3	2	-16.8417	0.00696597	0.479075	0.293318	0.0248017	0.707784	1.60552	['P23458']	JAK1
514	sp|P05166|PCCB_HUMAN	3	2	-9.59406	0.00697263	0.560399	1.01315	0.0248017	-0.854321	1.60552	['P05166']	PCCB
341	sp|O75947|ATP5H_HUMAN	12	8	-3.85931	0.00698322	0.910928	1.09466	0.0248145	-0.26507	1.60529	['O75947']	ATP5H
2316	sp|Q8IUR0|TPPC5_HUMAN	2	2	#NAME?	0.00700316	0.539445	0.521564	0.0248605	0.0486303	1.60449	['Q8IUR0']	TRAPPC5
1637	sp|Q03519|TAP2_HUMAN	13	5	-0.629714	0.00705942	0.787334	0.35394	0.0250352	1.15347	1.60145	['Q03519']	TAP2
2744	sp|Q96RQ3|MCCA_HUMAN	3	2	#NAME?	0.00722546	1.0178	0.453868	0.025582	1.16511	1.59207	['Q96RQ3']	MCCC1
107	sp|O14980|XPO1_HUMAN	14	7	-4.59436	0.00722797	0.705946	0.43987	0.025582	0.682482	1.59207	['O14980']	XPO1
2529	sp|Q8WXH0|SYNE2_HUMAN	5	3	#NAME?	0.0072443	0.404122	0.431539	0.0256143	-0.0946996	1.59152	['Q8WXH0']	SYNE2
1180	sp|P48147|PPCE_HUMAN	2	2	-9.92678	0.00726077	0.597026	0.306166	0.025647	0.963477	1.59096	['P48147']	PREP
1869	sp|Q14498|RBM39_HUMAN	11	8	-9.51617	0.00737847	1.01768	0.636967	0.0260369	0.675996	1.58441	['Q14498']	RBM39
3186	sp|Q9NX62|IMPA3_HUMAN	6	3	-7.67294	0.00744974	0.486326	0.682479	0.0262624	-0.48886	1.58067	['Q9NX62']	IMPAD1
243	sp|O60716|CTND1_HUMAN	24	11	-7.81585	0.00750586	0.479087	0.55616	0.026434	-0.215211	1.57784	['O60716']	CTNND1
3526	sp|Q9Y617|SERC_HUMAN	5	4	-20.0349	0.00751356	0.604257	0.305323	0.0264349	0.984823	1.57782	['Q9Y617']	PSAT1
1303	sp|P53004|BIEA_HUMAN	5	3	-15.5878	0.00753448	0.590019	0.361539	0.0264824	0.706612	1.57704	['P53004']	BLVRA
1211	sp|P49589|SYCC_HUMAN	7	5	-9.06952	0.00757454	0.665382	0.45404	0.0265969	0.551364	1.57517	['P49589']	CARS
1224	sp|P49792|RBP2_HUMAN	41	14	-5.31074	0.00758261	0.0798425	0.18752	0.026599	-1.23182	1.57514	['P49792']	RANBP2
518	sp|P05388|RLA0_HUMAN	13	5	-2.84803	0.00760416	1.1255	0.881784	0.0266483	0.352063	1.57433	['P05388']	RPLP0
346	sp|O76003|GLRX3_HUMAN	7	5	-5.09333	0.00768336	0.663716	0.410546	0.0268993	0.69302	1.57026	['O76003']	GLRX3
3293	sp|Q9UG63|ABCF2_HUMAN	8	4	-9.3782	0.00777376	0.591412	0.303484	0.027189	0.962544	1.56561	['Q9UG63']	ABCF2
1403	sp|P61019|RAB2A_HUMAN	13	7	-1.748	0.00778773	0.318953	1.00816	0.0272112	-1.66031	1.56525	['P61019']	RAB2A
768	sp|P17677|NEUM_HUMAN	8	5	-4.09987	0.00782209	0.843597	1.15509	0.0273044	-0.453382	1.56377	['P17677']	GAP43
2870	sp|Q9BVJ6|UT14A_HUMAN	5	3	#NAME?	0.00785621	0.619925	0.414871	0.0273966	0.579429	1.5623	['Q9BVJ6']	UTP14A
820	sp|P20908|CO5A1_HUMAN	8	3	0.865016	0.008111	0.24015	0.526856	0.0282574	-1.13347	1.54887	['P20908']	COL5A1
902	sp|P26358|DNMT1_HUMAN	14	6	#NAME?	0.00814277	0.548267	0.272217	0.0283403	1.01012	1.5476	['P26358']	DNMT1
1193	sp|P48735|IDHP_HUMAN	24	11	-11.5189	0.00817923	1.06234	0.938515	0.0284394	0.178797	1.54608	['P48735']	IDH2
340	sp|O75940|SPF30_HUMAN	3	2	-0.225837	0.00819692	1.0874	0.532313	0.0284731	1.03053	1.54557	['O75940']	SMNDC1
1389	sp|P60510|PP4C_HUMAN	4	3	#NAME?	0.00826375	0.713624	0.523239	0.0286772	0.447694	1.54246	['P60510']	PPP4C
1397	sp|P60903|S10AA_HUMAN	3	2	#NAME?	0.0082718	0.284019	1.17853	0.0286772	-2.05293	1.54246	['P60903']	S100A10
1160	sp|P46778|RL21_HUMAN	5	3	#NAME?	0.00832804	1.15064	0.387338	0.028844	1.57078	1.53994	['P46778']	RPL21
787	sp|P18621|RL17_HUMAN	6	4	-3.10706	0.00835775	1.18434	0.823459	0.0289188	0.52432	1.53882	['P18621']	RPL17
1210	sp|P49585|PCY1A_HUMAN	5	2	#NAME?	0.00839723	0.555868	0.263122	0.0290272	1.07901	1.5372	['P49585']	PCYT1A
2800	sp|Q99805|TM9S2_HUMAN	11	8	-21.4076	0.00847488	0.595548	0.493867	0.0292671	0.270095	1.53362	['Q99805']	TM9SF2
638	sp|P10644|KAP0_HUMAN	7	3	-17.0684	0.00849676	0.323833	0.507109	0.0293142	-0.647045	1.53292	['P10644']	PRKAR1A
333	sp|O75907|DGAT1_HUMAN	2	2	-11.9107	0.00858417	0.91191	1.091	0.0295871	-0.258681	1.5289	['O75907']	DGAT1
724	sp|P15121|ALDR_HUMAN	12	8	0.492084	0.00875194	0.725502	0.345851	0.0301362	1.06883	1.52091	['P15121']	AKR1B1
1497	sp|P62906|RL10A_HUMAN	11	7	-18.4461	0.00880861	0.543029	0.925519	0.0303019	-0.769234	1.51853	['P62906']	RPL10A
255	sp|O60841|IF2P_HUMAN	12	7	-5.37797	0.00891875	0.517171	0.328423	0.0306512	0.655085	1.51355	['O60841']	EIF5B
1671	sp|Q07157|ZO1_HUMAN	11	9	-151.764	0.00900555	0.517172	0.403584	0.0309196	0.357776	1.50977	['Q07157']	TJP1
2769	sp|Q99442|SEC62_HUMAN	5	4	#NAME?	0.00905256	0.296589	0.971376	0.0310511	-1.71156	1.50792	['Q99442']	SEC62
2960	sp|Q9H0S4|DDX47_HUMAN	8	3	#NAME?	0.00907406	0.566118	0.695031	0.0310948	-0.295975	1.50731	['Q9H0S4']	DDX47
602	sp|P09417|DHPR_HUMAN	2	2	-19.1575	0.0091404	0.74776	0.514705	0.031241	0.538829	1.50528	['P09417']	QDPR
2541	sp|Q92520|FAM3C_HUMAN	7	4	-1.75604	0.00914254	0.515177	0.940461	0.031241	-0.868298	1.50528	['Q92520']	FAM3C
1050	sp|P35612|ADDB_HUMAN	2	2	-16.1414	0.00914306	0.349864	0.578109	0.031241	-0.724548	1.50528	['P35612']	ADD2
2897	sp|Q9BY44|EIF2A_HUMAN	6	4	-6.34425	0.00921147	0.525925	0.32635	0.0314445	0.688437	1.50246	['Q9BY44']	EIF2A
623	sp|P0DJD1|RGPD2_HUMAN	14	6	-11.8318	0.00922851	0.297728	0.510009	0.0314725	-0.776525	1.50207	['P0DJD1']	RGPD2
1905	sp|Q15005|SPCS2_HUMAN	6	3	-6.49682	0.00925893	0.429488	1.09066	0.031546	-1.34451	1.50106	['Q15005']	SPCS2
1354	sp|P55786|PSA_HUMAN	9	6	0.913567	0.00955458	0.695428	0.486414	0.0325222	0.515717	1.48782	['P55786']	NPEPPS
3002	sp|Q9H4M9|EHD1_HUMAN	15	8	-7.45884	0.00965078	0.605522	0.442231	0.0328182	0.453379	1.48389	['Q9H4M9']	EHD1
3240	sp|Q9P0V9|SEP10_HUMAN	3	3	#NAME?	0.00969273	0.560401	0.38955	0.0329293	0.524648	1.48242	['Q9P0V9']	2010-09-01
2806	sp|Q99961|SH3G1_HUMAN	2	2	#NAME?	0.00976578	0.490233	0.229353	0.0331459	1.0959	1.47957	['Q99961']	SH3GL1
1866	sp|Q14376|GALE_HUMAN	3	2	-6.42714	0.0099216	0.608155	0.324188	0.0336426	0.907606	1.47311	['Q14376']	GALE
3100	sp|Q9NQX4|MYO5C_HUMAN	3	2	#NAME?	0.00993465	0.289592	0.664658	0.0336548	-1.19859	1.47295	['Q9NQX4']	MYO5C
986	sp|P30825|CTR1_HUMAN	5	2	1.5882	0.00995933	0.242636	0.569284	0.0337063	-1.23035	1.47229	['P30825']	SLC7A1
1979	sp|Q15796|SMAD2_HUMAN	2	2	#NAME?	0.00998941	0.910375	0.305994	0.033776	1.57296	1.47139	['Q15796']	SMAD2
1219	sp|P49750|YLPM1_HUMAN	11	3	-10.2535	0.0100113	0.120331	0.33833	0.0338178	-1.49143	1.47086	['P49750']	YLPM1
419	sp|O95674|CDS2_HUMAN	3	2	-2.83549	0.0101366	0.98588	0.628466	0.0342088	0.649577	1.46586	['O95674']	CDS2
1715	sp|Q12816|TROP_HUMAN	2	2	#NAME?	0.0101576	0.603937	0.320007	0.0342161	0.916296	1.46577	['Q12816']	TRO
2352	sp|Q8IXT5|RB12B_HUMAN	5	2	#NAME?	0.0101671	0.234505	0.484257	0.0342161	-1.04615	1.46577	['Q8IXT5']	RBM12B
2526	sp|Q8WX93|PALLD_HUMAN	7	3	#NAME?	0.0101677	0.409878	0.20695	0.0342161	0.985915	1.46577	['Q8WX93']	PALLD
2019	sp|Q16831|UPP1_HUMAN	2	2	#NAME?	0.0101941	0.712292	0.34884	0.0342708	1.0299	1.46508	['Q16831']	UPP1
1705	sp|Q10589|BST2_HUMAN	2	2	#NAME?	0.0102119	0.446467	0.0998617	0.0342708	2.16055	1.46508	['Q10589']	BST2
3165	sp|Q9NVS2|RT18A_HUMAN	3	2	-12.2635	0.0102128	0.306889	0.459612	0.0342708	-0.5827	1.46508	['Q9NVS2']	MRPS18A
69	sp|O00767|ACOD_HUMAN	3	3	#NAME?	0.0102997	0.216271	0.472753	0.0345296	-1.12825	1.46181	['O00767']	SCD
3376	sp|Q9UMY4|SNX12_HUMAN	2	2	#NAME?	0.0103987	0.506596	0.384684	0.0347951	0.397165	1.45848	['Q9UMY4']	SNX12
1374	sp|P57735|RAB25_HUMAN	2	2	#NAME?	0.0104069	0.589866	0.594086	0.0347951	-0.0102848	1.45848	['P57735']	RAB25
2301	sp|Q86WB0|NIPA_HUMAN	2	2	#NAME?	0.0104092	0.547457	0.590773	0.0347951	-0.109856	1.45848	['Q86WB0']	ZC3HC1
3547	sp|Q9Y6I8|PXMP4_HUMAN	2	2	#NAME?	0.010418	0.585544	0.422747	0.0347951	0.469984	1.45848	['Q9Y6I8']	PXMP4
2533	sp|Q8WYA6|CTBL1_HUMAN	5	2	#NAME?	0.0104517	0.27444	0.419767	0.034875	-0.6131	1.45749	['Q8WYA6']	CTNNBL1
1639	sp|Q04637|IF4G1_HUMAN	21	12	-10.8581	0.0105084	0.478174	0.331673	0.0350311	0.527772	1.45555	['Q04637']	EIF4G1
958	sp|P30046|DOPD_HUMAN	3	2	#NAME?	0.0106243	0.490609	0.198452	0.0353751	1.30578	1.4513	['P30046']	DDT
1758	sp|Q13200|PSMD2_HUMAN	21	6	-9.32577	0.0106314	0.344787	0.413187	0.0353751	-0.261088	1.4513	['Q13200']	PSMD2
815	sp|P20648|ATP4A_HUMAN	4	2	#NAME?	0.0106481	0.856105	1.16808	0.0353975	-0.448282	1.45103	['P20648']	ATP4A
3207	sp|Q9NYL4|FKB11_HUMAN	2	2	-5.62291	0.0106669	1.18393	0.852603	0.0353994	0.47364	1.451	['Q9NYL4']	FKBP11
3289	sp|Q9UDY8|MALT1_HUMAN	2	2	#NAME?	0.0106686	0.57203	0.245561	0.0353994	1.22001	1.451	['Q9UDY8']	MALT1
1420	sp|P61313|RL15_HUMAN	10	4	-17.1478	0.0107313	0.276504	1.28562	0.0355744	-2.21709	1.44886	['P61313']	RPL15
1598	sp|Q01105|SET_HUMAN	8	3	-99.4302	0.0107508	1.1303	0.212889	0.0356058	2.40853	1.44848	['Q01105']	SET
251	sp|O60826|CCD22_HUMAN	2	2	#NAME?	0.010917	0.502046	0.317131	0.0360917	0.662739	1.44259	['O60826']	CCDC22
1008	sp|P32456|GBP2_HUMAN	2	2	#NAME?	0.0109178	0.603063	0.295846	0.0360917	1.02746	1.44259	['P32456']	GBP2
1904	sp|Q15004|PAF15_HUMAN	2	2	4.23988	0.0109422	0.596188	0.35544	0.036122	0.746161	1.44223	['Q15004']	KIAA0101
1776	sp|Q13404|UB2V1_HUMAN	2	2	#NAME?	0.0109473	0.721716	0.49527	0.036122	0.543218	1.44223	['Q13404']	UBE2V1
1236	sp|P50402|EMD_HUMAN	11	4	-3.35072	0.0109764	0.83028	1.1966	0.0361844	-0.527265	1.44148	['P50402']	EMD
268	sp|O75150|BRE1B_HUMAN	6	3	-12.4608	0.0110287	0.53773	0.343661	0.0363234	0.645897	1.43981	['O75150']	RNF40
1246	sp|P50750|CDK9_HUMAN	3	2	#NAME?	0.0110729	0.473701	0.587828	0.0364133	-0.311416	1.43874	['P50750']	CDK9
41	sp|O00244|ATOX1_HUMAN	2	2	-68.7106	0.0110765	0.584781	0.341969	0.0364133	0.774031	1.43874	['O00244']	ATOX1
2486	sp|Q8TDB6|DTX3L_HUMAN	6	2	-6.95172	0.0110918	0.505001	0.220784	0.0364299	1.19365	1.43854	['Q8TDB6']	DTX3L
1285	sp|P52294|IMA5_HUMAN	6	4	-16.0508	0.0112082	0.478402	0.376249	0.0367783	0.346538	1.43441	['P52294']	KPNA1
2312	sp|Q8IU81|I2BP1_HUMAN	3	2	#NAME?	0.0112453	0.471992	0.232512	0.0368606	1.02146	1.43344	['Q8IU81']	IRF2BP1
2877	sp|Q9BW27|NUP85_HUMAN	7	2	#NAME?	0.011254	0.266333	0.539217	0.0368606	-1.01764	1.43344	['Q9BW27']	NUP85
572	sp|P08134|RHOC_HUMAN	7	4	#NAME?	0.0112674	0.625244	0.53224	0.0368705	0.23234	1.43332	['P08134']	RHOC
2878	sp|Q9BW60|ELOV1_HUMAN	3	3	#NAME?	0.011289	0.560683	0.633216	0.036907	-0.175513	1.43289	['Q9BW60']	ELOVL1
582	sp|P08579|RU2B_HUMAN	4	3	-17.5553	0.0114074	1.0321	0.52422	0.0372601	0.977343	1.42876	['P08579']	SNRPB2
311	sp|O75581|LRP6_HUMAN	2	2	#NAME?	0.0115579	0.638001	0.407045	0.037717	0.64837	1.42346	['O75581']	LRP6
3107	sp|Q9NR45|SIAS_HUMAN	2	2	-2.1316	0.0115736	0.671427	0.270077	0.0377335	1.31386	1.42327	['Q9NR45']	NANS
1721	sp|Q12873|CHD3_HUMAN	8	3	-8.21369	0.0119325	0.311328	0.452842	0.0388679	-0.540573	1.41041	['Q12873']	CHD3
2488	sp|Q8TDI0|CHD5_HUMAN	10	9	-9.56363	0.012054	0.484282	0.53588	0.0392279	-0.146063	1.40641	['Q8TDI0']	CHD5
3518	sp|Q9Y5S2|MRCKB_HUMAN	2	2	#NAME?	0.012073	0.531227	0.48826	0.0392537	0.12168	1.40612	['Q9Y5S2']	CDC42BPB
2114	sp|Q5THJ4|VP13D_HUMAN	2	2	-4.52832	0.0121483	0.603337	0.43079	0.0394626	0.485977	1.40381	['Q5THJ4']	VPS13D
1876	sp|Q14573|ITPR3_HUMAN	35	24	#NAME?	0.0121631	0.414787	0.444742	0.0394747	-0.100599	1.40368	['Q14573']	ITPR3
2545	sp|Q92542|NICA_HUMAN	3	3	-58.1457	0.0122125	0.309448	0.343587	0.0395755	-0.150976	1.40257	['Q92542']	NCSTN
2564	sp|Q92734|TFG_HUMAN	4	3	-6.56621	0.0122165	0.800848	0.660742	0.0395755	0.277442	1.40257	['Q92734']	TFG
871	sp|P23919|KTHY_HUMAN	4	3	-4.99182	0.0122357	0.474347	0.288206	0.0396019	0.718842	1.40228	['P23919']	DTYMK
3035	sp|Q9H9J2|RM44_HUMAN	6	3	#NAME?	0.0122574	0.324945	0.601774	0.039636	-0.889026	1.40191	['Q9H9J2']	MRPL44
3369	sp|Q9UM54|MYO6_HUMAN	10	3	-6.68568	0.0122829	0.142593	0.274443	0.0396825	-0.944602	1.4014	['Q9UM54']	MYO6
2852	sp|Q9BUE6|ISCA1_HUMAN	2	2	-9.45436	0.0123044	0.526664	0.443418	0.0397156	0.248217	1.40104	['Q9BUE6']	ISCA1
568	sp|P08069|IGF1R_HUMAN	4	2	#NAME?	0.0123351	0.311185	0.0969793	0.0397789	1.68202	1.40035	['P08069']	IGF1R
842	sp|P22102|PUR2_HUMAN	10	4	2.6692	0.0123877	0.333572	0.177274	0.0398783	0.912019	1.39926	['P22102']	GART
2323	sp|Q8IVL6|P3H3_HUMAN	4	3	-4.00263	0.0123884	0.358939	0.523814	0.0398783	-0.545314	1.39926	['Q8IVL6']	LEPREL2
3401	sp|Q9UPX6|K1024_HUMAN	2	2	#NAME?	0.0124165	0.53697	0.354745	0.0398959	0.598058	1.39907	['Q9UPX6']	KIAA1024
1260	sp|P51159|RB27A_HUMAN	5	3	#NAME?	0.0124248	0.341017	0.537375	0.0398959	-0.656086	1.39907	['P51159']	RAB27A
1966	sp|Q15643|TRIPB_HUMAN	8	3	-6.36799	0.0124275	0.0404403	0.0879614	0.0398959	-1.12108	1.39907	['Q15643']	TRIP11
752	sp|P16615|AT2A2_HUMAN	36	18	-28.2137	0.0124886	0.30195	0.343968	0.040056	-0.187963	1.39733	['P16615']	ATP2A2
1499	sp|P62913|RL11_HUMAN	5	2	#NAME?	0.0126464	1.08344	0.226741	0.0405186	2.2565	1.39235	['P62913']	RPL11
2429	sp|Q8NCA5|FA98A_HUMAN	5	3	#NAME?	0.0126669	0.394038	0.216212	0.0405186	0.865891	1.39235	['Q8NCA5']	FAM98A
218	sp|O60216|RAD21_HUMAN	9	3	#NAME?	0.012667	0.348264	0.569682	0.0405186	-0.709974	1.39235	['O60216']	RAD21
2652	sp|Q96DI7|SNR40_HUMAN	10	5	#NAME?	0.0126886	0.49213	0.473656	0.0405464	0.0552011	1.39205	['Q96DI7']	SNRNP40
2103	sp|Q5T4S7|UBR4_HUMAN	2	2	#NAME?	0.0126985	0.541642	0.744705	0.0405464	-0.459331	1.39205	['Q5T4S7']	UBR4
2072	sp|Q5EBM0|CMPK2_HUMAN	4	2	1.54782	0.012725	0.611255	0.332899	0.0405944	0.876691	1.39153	['Q5EBM0']	CMPK2
1089	sp|P39019|RS19_HUMAN	8	3	#NAME?	0.0127401	0.401033	0.354558	0.0406062	0.177697	1.39141	['P39019']	RPS19
3531	sp|Q9Y657|SPIN1_HUMAN	2	2	#NAME?	0.0128632	0.353877	0.332518	0.0409614	0.0898182	1.38763	['Q9Y657']	SPIN1
2168	sp|Q6P2Q9|PRP8_HUMAN	61	24	-11.0196	0.0128746	0.430397	0.499773	0.0409614	-0.215604	1.38763	['Q6P2Q9']	PRPF8
2362	sp|Q8IYQ7|THNS1_HUMAN	3	3	#NAME?	0.0129361	0.44487	0.467472	0.0410942	-0.0714949	1.38622	['Q8IYQ7']	THNSL1
2039	sp|Q460N5|PAR14_HUMAN	11	5	-8.76108	0.0129501	0.182199	0.0673648	0.0410942	1.43545	1.38622	['Q460N5']	PARP14
3029	sp|Q9H930|SP14L_HUMAN	3	2	-8.83188	0.0129601	0.674285	0.324326	0.0410942	1.05592	1.38622	['Q9H930']	SP140L
3129	sp|Q9NSD9|SYFB_HUMAN	11	3	#NAME?	0.0129666	0.315697	0.342253	0.0410942	-0.11652	1.38622	['Q9NSD9']	FARSB
3242	sp|Q9P0Z9|SOX_HUMAN	7	3	-12.5221	0.0129785	0.285938	0.423767	0.0410942	-0.567565	1.38622	['Q9P0Z9']	PIPOX
938	sp|P28715|ERCC5_HUMAN	3	3	#NAME?	0.0129856	0.489501	0.494677	0.0410942	-0.0151757	1.38622	['P28715']	ERCC5
1708	sp|Q12769|NU160_HUMAN	11	3	-7.85762	0.0130331	0.315991	0.491463	0.0412077	-0.6372	1.38502	['Q12769']	NUP160
1427	sp|P61604|CH10_HUMAN	8	4	-1.85585	0.0130603	0.730431	1.4662	0.041257	-1.00526	1.3845	['P61604']	HSPE1
3485	sp|Q9Y490|TLN1_HUMAN	66	26	-4.89092	0.01311	0.527186	0.323711	0.0413774	0.703607	1.38324	['Q9Y490']	TLN1
3301	sp|Q9UH99|SUN2_HUMAN	5	5	#NAME?	0.013171	0.419332	0.574363	0.0415161	-0.45387	1.38178	['Q9UH99']	SUN2
720	sp|P14866|HNRPL_HUMAN	22	10	-15.5832	0.0131842	0.948655	1.06269	0.0415161	-0.16376	1.38178	['P14866']	HNRNPL
1152	sp|P46087|NOP2_HUMAN	15	10	-11.249	0.013189	0.988113	1.0119	0.0415161	-0.0343175	1.38178	['P46087']	NOP2
3226	sp|Q9NZZ3|CHMP5_HUMAN	3	2	#NAME?	0.0132276	0.463186	0.279037	0.0416007	0.731137	1.3809	['Q9NZZ3']	CHMP5
511	sp|P05141|ADT2_HUMAN	16	6	4.63305	0.0132444	0.772271	1.29206	0.0416126	-0.742495	1.38077	['P05141']	SLC25A5
2551	sp|Q92599|SEPT8_HUMAN	3	2	#NAME?	0.0132547	0.319556	0.320886	0.0416126	-0.00599127	1.38077	['Q92599']	2008-09-01
1957	sp|Q15428|SF3A2_HUMAN	4	3	-0.979782	0.0132672	0.37147	0.438991	0.041615	-0.240945	1.38075	['Q15428']	SF3A2
2943	sp|Q9GZY8|MFF_HUMAN	4	3	#NAME?	0.0133015	0.359422	0.367849	0.0416858	-0.0334346	1.38001	['Q9GZY8']	MFF
1773	sp|Q13347|EIF3I_HUMAN	11	4	#NAME?	0.0133619	1.08725	0.908423	0.0418383	0.259251	1.37843	['Q13347']	EIF3I
3348	sp|Q9UKU7|ACAD8_HUMAN	2	2	#NAME?	0.0133956	0.61293	0.653378	0.041907	-0.0921958	1.37771	['Q9UKU7']	ACAD8
2656	sp|Q96DV4|RM38_HUMAN	4	2	-7.31603	0.0134446	0.485441	1.13314	0.0420233	-1.22296	1.37651	['Q96DV4']	MRPL38
2935	sp|Q9C0G6|DYH6_HUMAN	4	4	#NAME?	0.0135407	0.218925	0.32418	0.0422645	-0.566362	1.37402	['Q9C0G6']	DNAH6
2729	sp|Q96PK6|RBM14_HUMAN	11	4	-2.40173	0.0135456	1.08425	0.909828	0.0422645	0.253037	1.37402	['Q96PK6']	RBM14
1196	sp|P49006|MRP_HUMAN	5	3	-4.98819	0.0135603	1.12449	0.23215	0.0422735	2.27615	1.37393	['P49006']	MARCKSL1
2042	sp|Q4G0N4|NAKD2_HUMAN	9	4	-24.5121	0.013623	0.375602	0.206403	0.0424317	0.863738	1.37231	['Q4G0N4']	NADK2
3265	sp|Q9UBE0|SAE1_HUMAN	7	3	-15.4769	0.0136418	0.548756	0.36419	0.0424532	0.591475	1.37209	['Q9UBE0']	SAE1
428	sp|O95816|BAG2_HUMAN	9	3	-6.1657	0.0136892	0.14275	0.260749	0.0425285	-0.869169	1.37132	['O95816']	BAG2
652	sp|P11233|RALA_HUMAN	5	3	-12.3255	0.0136899	1.0219	0.979495	0.0425285	0.0611444	1.37132	['P11233']	RALA
66	sp|O00743|PPP6_HUMAN	4	3	#NAME?	0.0137086	0.607208	0.610632	0.0425468	-0.00811441	1.37113	['O00743']	PPP6C
3109	sp|Q9NR82|KCNQ5_HUMAN	4	3	-12.5693	0.0137198	0.244342	0.361631	0.0425468	-0.565614	1.37113	['Q9NR82']	KCNQ5
1502	sp|P62942|FKB1A_HUMAN	3	3	-0.556351	0.0137632	0.722676	0.34031	0.0426444	1.0865	1.37014	['P62942']	FKBP1A
1969	sp|Q15650|TRIP4_HUMAN	3	3	#NAME?	0.0138526	0.253715	0.368115	0.0428629	-0.536949	1.36792	['Q15650']	TRIP4
10	sp|A6NCI4|VWA3A_HUMAN	3	3	-11.4199	0.0138655	0.297569	0.500538	0.0428629	-0.750257	1.36792	['A6NCI4']	VWA3A
1521	sp|P63244|GBLP_HUMAN	19	11	0.600202	0.0138788	0.556256	0.387676	0.0428629	0.520895	1.36792	['P63244']	GNB2L1
1401	sp|P61009|SPCS3_HUMAN	2	2	#NAME?	0.0138819	0.676945	1.06084	0.0428629	-0.648096	1.36792	['P61009']	SPCS3
641	sp|P10909|CLUS_HUMAN	3	2	-14.6524	0.0139582	0.334169	0.608081	0.0430341	-0.863683	1.36619	['P10909']	CLU
2383	sp|Q8N2K0|ABD12_HUMAN	10	3	#NAME?	0.0139616	0.260374	0.357534	0.0430341	-0.457495	1.36619	['Q8N2K0']	ABHD12
2050	sp|Q53EP0|FND3B_HUMAN	5	4	-0.215532	0.0141398	0.720616	0.427789	0.0435458	0.752331	1.36105	['Q53EP0']	FNDC3B
284	sp|O75368|SH3L1_HUMAN	2	2	#NAME?	0.0141587	0.518274	0.269303	0.0435567	0.944484	1.36095	['O75368']	SH3BGRL
952	sp|P29992|GNA11_HUMAN	13	6	0.613349	0.0141679	0.507447	0.628146	0.0435567	-0.307844	1.36095	['P29992']	GNA11
3139	sp|Q9NTZ6|RBM12_HUMAN	7	6	-101.501	0.0142501	0.303522	0.424327	0.0437718	-0.483377	1.35881	['Q9NTZ6']	RBM12
253	sp|O60831|PRAF2_HUMAN	4	3	-7.90328	0.0142684	0.941497	0.389912	0.0437902	1.27181	1.35862	['O60831']	PRAF2
2681	sp|Q96GD4|AURKB_HUMAN	2	2	#NAME?	0.0143044	0.629372	0.391316	0.0438627	0.685582	1.3579	['Q96GD4']	AURKB
1936	sp|Q15269|PWP2_HUMAN	5	2	#NAME?	0.0143434	0.457841	1.02027	0.0439445	-1.15603	1.3571	['Q15269']	PWP2
3040	sp|Q9HA77|SYCM_HUMAN	14	10	#NAME?	0.0144487	0.373189	0.519085	0.0442291	-0.476064	1.35429	['Q9HA77']	CARS2
351	sp|O76031|CLPX_HUMAN	20	14	-7.31891	0.014523	0.459892	0.478048	0.0444182	-0.0558587	1.35244	['O76031']	CLPX
3446	sp|Q9Y2Z0|SUGT1_HUMAN	4	2	#NAME?	0.0145788	0.269776	0.104201	0.0445298	1.3724	1.35135	['Q9Y2Z0']	SUGT1
3220	sp|Q9NZL9|MAT2B_HUMAN	4	3	-5.30508	0.0145917	0.639641	0.392884	0.0445298	0.703158	1.35135	['Q9NZL9']	MAT2B
2415	sp|Q8NB49|AT11C_HUMAN	4	2	#NAME?	0.0145971	0.359436	0.382659	0.0445298	-0.0903257	1.35135	['Q8NB49']	ATP11C
2358	sp|Q8IY95|TM192_HUMAN	2	2	#NAME?	0.0146855	0.296335	0.485457	0.0447613	-0.712114	1.3491	['Q8IY95']	TMEM192
2600	sp|Q93084|AT2A3_HUMAN	8	3	#NAME?	0.0149255	0.662772	0.692141	0.0454537	-0.0625526	1.34243	['Q93084']	ATP2A3
513	sp|P05165|PCCA_HUMAN	2	2	#NAME?	0.0151136	0.498894	0.708841	0.0459585	-0.50673	1.33763	['P05165']	PCCA
3447	sp|Q9Y2Z4|SYYM_HUMAN	8	3	-9.182	0.0151171	0.343152	0.50496	0.0459585	-0.557324	1.33763	['Q9Y2Z4']	YARS2
1746	sp|Q13111|CAF1A_HUMAN	2	2	#NAME?	0.0152172	0.461887	0.362053	0.0462235	0.351337	1.33514	['Q13111']	CHAF1A
2730	sp|Q96PU4|UHRF2_HUMAN	4	2	#NAME?	0.0152662	0.271776	0.290304	0.0463327	-0.0951464	1.33411	['Q96PU4']	UHRF2
2493	sp|Q8TEA8|DTD1_HUMAN	2	2	-5.25459	0.0152849	0.617098	0.60756	0.0463497	0.0224723	1.33395	['Q8TEA8']	DTD1
2234	sp|Q7L576|CYFP1_HUMAN	7	3	-9.07157	0.0154022	0.405768	0.334233	0.0466659	0.279799	1.331	['Q7L576']	CYFIP1
1606	sp|Q01780|EXOSX_HUMAN	12	9	-16.1989	0.0154702	0.477559	0.487911	0.0468063	-0.03094	1.3297	['Q01780']	EXOSC10
1592	sp|Q00688|FKBP3_HUMAN	5	3	-5.41439	0.0154749	0.627277	0.276237	0.0468063	1.1832	1.3297	['Q00688']	FKBP3
2040	sp|Q49A26|GLYR1_HUMAN	4	3	-9.186	0.0155816	0.37575	0.392645	0.0470891	-0.0634525	1.32708	['Q49A26']	GLYR1
1402	sp|P61011|SRP54_HUMAN	5	3	-10.0976	0.0156259	0.536846	0.379061	0.0471828	0.502078	1.32622	['P61011']	SRP54
529	sp|P06493|CDK1_HUMAN	7	4	#NAME?	0.0157489	0.579145	0.319046	0.0474244	0.860163	1.324	['P06493']	CDK1
2574	sp|Q92817|EVPL_HUMAN	3	3	-11.819	0.0157506	0.238367	0.355836	0.0474244	-0.578026	1.324	['Q92817']	EVPL
3541	sp|Q9Y6D9|MD1L1_HUMAN	4	3	-7.71458	0.0157557	0.560359	0.411176	0.0474244	0.446596	1.324	['Q9Y6D9']	MAD1L1
3236	sp|Q9P0M6|H2AW_HUMAN	4	2	-9.75656	0.0157593	0.454714	0.503406	0.0474244	-0.146765	1.324	['Q9P0M6']	H2AFY2
1781	sp|Q13425|SNTB2_HUMAN	5	4	-7.94111	0.0158212	0.338059	0.499066	0.0475351	-0.561955	1.32299	['Q13425']	SNTB2
3391	sp|Q9UNX4|WDR3_HUMAN	4	2	#NAME?	0.0158227	0.456851	0.152085	0.0475351	1.58685	1.32299	['Q9UNX4']	WDR3
1703	sp|Q10567|AP1B1_HUMAN	23	10	#NAME?	0.0159434	0.316689	0.288821	0.0478572	0.132888	1.32005	['Q10567']	AP1B1
3187	sp|Q9NX63|CHCH3_HUMAN	11	6	-9.35799	0.015981	0.458541	1.02901	0.0478992	-1.16614	1.31967	['Q9NX63']	CHCHD3
1365	sp|P56385|ATP5I_HUMAN	5	5	-3.19365	0.0159958	0.520475	1.11556	0.0478992	-1.09987	1.31967	['P56385']	ATP5I
36	sp|O00214|LEG8_HUMAN	3	2	-10.25	0.0159978	0.509655	0.323737	0.0478992	0.654697	1.31967	['O00214']	LGALS8
1597	sp|Q01085|TIAR_HUMAN	6	3	#NAME?	0.0160709	0.50066	0.482291	0.0480774	0.0539288	1.31806	['Q01085']	TIAL1
2972	sp|Q9H269|VPS16_HUMAN	2	2	#NAME?	0.0160971	0.372305	0.370301	0.0481154	0.0077848	1.31772	['Q9H269']	VPS16
2174	sp|Q6PCE3|PGM2L_HUMAN	2	2	#NAME?	0.0164133	0.51039	0.324587	0.0490194	0.652996	1.30963	['Q6PCE3']	PGM2L1
2981	sp|Q9H2W6|RM46_HUMAN	6	2	1.74871	0.0165164	1.4422	0.287212	0.0492859	2.32808	1.30728	['Q9H2W6']	MRPL46
2180	sp|Q6PK04|CC137_HUMAN	2	2	#NAME?	0.0166181	0.594473	0.449274	0.0495479	0.404017	1.30498	['Q6PK04']	CCDC137
228	sp|O60341|KDM1A_HUMAN	7	4	-3.17016	0.0166648	0.418351	0.645441	0.0496454	-0.625572	1.30412	['O60341']	KDM1A
914	sp|P27144|KAD4_HUMAN	7	4	-9.98611	0.0167192	0.381226	0.672073	0.0497202	-0.81797	1.30347	['P27144']	AK4
605	sp|P09493|TPM1_HUMAN	13	6	#NAME?	0.0167246	0.212355	0.331552	0.0497202	-0.642756	1.30347	['P09493']	TPM1
2185	sp|Q6RI45|BRWD3_HUMAN	2	2	#NAME?	0.0167318	0.323673	0.32033	0.0497202	0.0149787	1.30347	['Q6RI45']	BRWD3
1725	sp|Q12905|ILF2_HUMAN	15	7	-49.5073	0.0167656	0.936649	1.06782	0.0497789	-0.189092	1.30295	['Q12905']	ILF2
2764	sp|Q96TC7|RMD3_HUMAN	10	6	-26.6557	0.0168	0.481615	0.536294	0.0498396	-0.155145	1.30243	['Q96TC7']	RMDN3
418	sp|O95602|RPA1_HUMAN	10	6	#NAME?	0.0168756	0.373068	0.407874	0.0500057	-0.128686	1.30098	['O95602']	POLR1A
1910	sp|Q15014|MO4L2_HUMAN	3	3	#NAME?	0.0168841	0.512587	0.393791	0.0500057	0.380366	1.30098	['Q15014']	MORF4L2
1983	sp|Q15904|VAS1_HUMAN	8	3	-8.68171	0.0170438	0.366205	0.678241	0.0504367	-0.889148	1.29725	['Q15904']	ATP6AP1
2142	sp|Q6E0U4|DMKN_HUMAN	2	2	-10.1223	0.0170779	0.571608	0.529726	0.0504956	0.109781	1.29675	['Q6E0U4']	DMKN
3182	sp|Q9NX46|ARHL2_HUMAN	3	2	#NAME?	0.0172105	0.566304	0.416943	0.0508452	0.441728	1.29375	['Q9NX46']	ADPRHL2
3250	sp|Q9P2D1|CHD7_HUMAN	2	2	#NAME?	0.0172407	0.543713	0.39163	0.0508921	0.473352	1.29335	['Q9P2D1']	CHD7
1516	sp|P63173|RL38_HUMAN	3	2	-13.5499	0.017412	0.710097	0.394575	0.0513553	0.847715	1.28941	['P63173']	RPL38
1421	sp|P61326|MGN_HUMAN;sp|Q96A72|MGN2_HUMAN	4	2	3.005	0.0176045	0.899107	1.11963	0.0518802	-0.31646	1.285	['P61326', 'Q96A72']	MAGOH
3259	sp|Q9P2X0|DPM3_HUMAN	2	2	#NAME?	0.017839	0.560769	0.49207	0.0525276	0.188543	1.27961	['Q9P2X0']	DPM3
1230	sp|P49959|MRE11_HUMAN	8	4	#NAME?	0.0178952	0.49589	0.362824	0.0526493	0.450749	1.27861	['P49959']	MRE11A
1842	sp|Q14145|KEAP1_HUMAN	2	2	#NAME?	0.017934	0.388527	0.410746	0.0527201	-0.0802301	1.27802	['Q14145']	KEAP1
1646	sp|Q04828|AK1C1_HUMAN	2	2	#NAME?	0.0180383	0.723473	0.453321	0.0529829	0.674407	1.27586	['Q04828']	AKR1C1
1371	sp|P57088|TMM33_HUMAN	5	4	-2.30062	0.0181762	0.831154	1.20031	0.0533065	-0.530215	1.27322	['P57088']	TMEM33
2974	sp|Q9H2B2|SYT4_HUMAN	2	2	#NAME?	0.0181785	0.56959	0.777078	0.0533065	-0.448136	1.27322	['Q9H2B2']	SYT4
164	sp|O43286|B4GT5_HUMAN	3	2	#NAME?	0.0183175	0.290614	0.254221	0.0536701	0.19302	1.27027	['O43286']	B4GALT5
1243	sp|P50579|MAP2_HUMAN	2	2	2.87215	0.0183495	0.583504	0.388972	0.0537194	0.585075	1.26987	['P50579']	METAP2
2461	sp|Q8NI36|WDR36_HUMAN	7	3	-8.2484	0.0184589	0.533041	0.405899	0.0539953	0.393124	1.26764	['Q8NI36']	WDR36
131	sp|O15235|RT12_HUMAN	3	2	#NAME?	0.0186491	0.581763	0.350665	0.0545068	0.73034	1.26355	['O15235']	MRPS12
1065	sp|P36543|VATE1_HUMAN	6	3	-12.2181	0.0186932	0.824385	1.18904	0.0545909	-0.528405	1.26288	['P36543']	ATP6V1E1
2985	sp|Q9H3K2|GHITM_HUMAN	4	3	#NAME?	0.0187465	0.246744	0.448669	0.0547017	-0.862639	1.262	['Q9H3K2']	GHITM
1822	sp|Q13823|NOG2_HUMAN	2	2	#NAME?	0.0188448	0.575665	0.334522	0.0549434	0.783129	1.26008	['Q13823']	GNL2
657	sp|P11387|TOP1_HUMAN	27	15	-10.5879	0.0190747	0.351298	0.292778	0.055552	0.26289	1.2553	['P11387']	TOP1
2135	sp|Q69YQ0|CYTSA_HUMAN	6	5	#NAME?	0.0190848	0.424761	0.470789	0.055552	-0.148429	1.2553	['Q69YQ0']	SPECC1L
1688	sp|Q08431|MFGM_HUMAN	4	3	#NAME?	0.019192	0.446774	0.556567	0.0558183	-0.317009	1.25322	['Q08431']	MFGE8
2148	sp|Q6IQ22|RAB12_HUMAN	2	2	#NAME?	0.0192981	0.453383	0.545562	0.0560482	-0.267013	1.25144	['Q6IQ22']	RAB12
3337	sp|Q9UJZ1|STML2_HUMAN	11	6	-17.5618	0.0193025	0.8686	1.13091	0.0560482	-0.380721	1.25144	['Q9UJZ1']	STOML2
3209	sp|Q9NYM9|BET1L_HUMAN	3	2	-6.47781	0.0193447	0.534507	0.590643	0.0561248	-0.144077	1.25085	['Q9NYM9']	BET1L
1731	sp|Q12931|TRAP1_HUMAN	20	7	-6.82768	0.0194293	0.242803	0.581535	0.0563243	-1.26008	1.2493	['Q12931']	TRAP1
1898	sp|Q14847|LASP1_HUMAN	8	5	0.597217	0.0195537	0.724808	0.417951	0.056639	0.794263	1.24688	['Q14847']	LASP1
2184	sp|Q6RFH5|WDR74_HUMAN	2	2	#NAME?	0.019622	0.416122	0.585115	0.0567904	-0.491715	1.24573	['Q6RFH5']	WDR74
2403	sp|Q8N684|CPSF7_HUMAN	9	3	-16.0575	0.0196733	0.43193	0.695911	0.0568927	-0.688103	1.24494	['Q8N684']	CPSF7
1340	sp|P55036|PSMD4_HUMAN	8	6	#NAME?	0.0197438	0.556832	0.458797	0.05705	0.279386	1.24374	['P55036']	PSMD4
648	sp|P11177|ODPB_HUMAN	12	6	-2.22333	0.0198445	0.354256	0.60802	0.0572946	-0.779328	1.24189	['P11177']	PDHB
3277	sp|Q9UBS4|DJB11_HUMAN	13	9	-14.0903	0.0198851	0.449416	0.489619	0.0573653	-0.123609	1.24135	['Q9UBS4']	DNAJB11
4	sp|A2RRP1|NBAS_HUMAN	6	3	-6.34938	0.0200678	0.367546	0.248818	0.0578453	0.562837	1.23773	['A2RRP1']	NBAS
1696	sp|Q0P6H9|TMM62_HUMAN	2	2	#NAME?	0.0201943	0.52481	0.30968	0.058163	0.761017	1.23535	['Q0P6H9']	TMEM62
2389	sp|Q8N442|GUF1_HUMAN	2	2	#NAME?	0.0202835	0.445254	0.470571	0.0583703	-0.0797835	1.23381	['Q8N442']	GUF1
3331	sp|Q9UJU6|DBNL_HUMAN	5	2	5.94867	0.0202994	0.430709	0.240995	0.0583703	0.837707	1.23381	['Q9UJU6']	DBNL
387	sp|O95183|VAMP5_HUMAN	2	2	#NAME?	0.0203155	0.44378	0.286538	0.0583703	0.631121	1.23381	['O95183']	VAMP5
3428	sp|Q9Y2K7|KDM2A_HUMAN	4	2	#NAME?	0.0203907	0.320687	0.280387	0.0585391	0.193749	1.23255	['Q9Y2K7']	KDM2A
2211	sp|Q6ZUT6|CO052_HUMAN	2	2	#NAME?	0.0204403	0.575689	0.408401	0.0586341	0.495303	1.23185	['Q6ZUT6']	C15orf52
3405	sp|Q9UQE7|SMC3_HUMAN	28	18	-133.231	0.020467	0.285424	0.320531	0.0586632	-0.16736	1.23163	['Q9UQE7']	SMC3
599	sp|P09132|SRP19_HUMAN	3	3	-21.5015	0.0207286	0.661552	0.413552	0.0593651	0.677786	1.22647	['P09132']	SRP19
1814	sp|Q13636|RAB31_HUMAN	4	2	#NAME?	0.0207616	0.718296	0.440784	0.0593898	0.704508	1.22629	['Q13636']	RAB31
2241	sp|Q7L9L4|MOB1B_HUMAN;sp|Q9H8S9|MOB1A_HUMAN	3	2	#NAME?	0.0207706	0.648417	0.326775	0.0593898	0.988622	1.22629	['Q7L9L4', 'Q9H8S9']	MOB1B
770	sp|P17813|EGLN_HUMAN	6	6	-106.062	0.0208443	0.501044	0.499587	0.0595527	0.00420339	1.2251	['P17813']	ENG
1123	sp|P42566|EPS15_HUMAN	3	2	-3.34699	0.0209346	0.3439	0.168901	0.0597628	1.02581	1.22357	['P42566']	EPS15
1129	sp|P42785|PCP_HUMAN	8	3	-3.76275	0.0210119	0.311751	0.57221	0.0599352	-0.876153	1.22232	['P42785']	PRCP
3338	sp|Q9UK61|F208A_HUMAN	4	2	-10.3693	0.0211287	0.287397	0.480697	0.0602202	-0.742082	1.22026	['Q9UK61']	FAM208A
1295	sp|P52789|HXK2_HUMAN	10	5	#NAME?	0.0211766	0.528416	0.375852	0.0602882	0.491509	1.21977	['P52789']	HK2
2398	sp|Q8N5A5|ZGPAT_HUMAN	3	2	#NAME?	0.0211865	0.215219	0.52824	0.0602882	-1.29539	1.21977	['Q8N5A5']	ZGPAT
1788	sp|Q13443|ADAM9_HUMAN	6	4	#NAME?	0.021372	0.565681	0.762938	0.0607675	-0.431579	1.21633	['Q13443']	ADAM9
1734	sp|Q12965|MYO1E_HUMAN	3	3	-7.54671	0.0214018	0.520241	0.412513	0.0608036	0.334742	1.21607	['Q12965']	MYO1E
3060	sp|Q9HCG7|GBA2_HUMAN	2	2	#NAME?	0.0214854	0.32185	0.299835	0.0609925	0.102221	1.21472	['Q9HCG7']	GBA2
1732	sp|Q12955|ANK3_HUMAN	6	3	-5.43711	0.0215556	0.241319	0.433566	0.0611038	-0.845311	1.21393	['Q12955']	ANK3
2011	sp|Q16720|AT2B3_HUMAN	7	2	-11.6705	0.021559	0.899278	1.13484	0.0611038	-0.335651	1.21393	['Q16720']	ATP2B3
1955	sp|Q15424|SAFB1_HUMAN	20	12	-83.1758	0.0216229	0.41952	0.351509	0.0612362	0.255178	1.21299	['Q15424']	SAFB
1052	sp|P35625|TIMP3_HUMAN	2	2	#NAME?	0.0216433	0.361007	0.383304	0.0612453	-0.0864649	1.21293	['P35625']	TIMP3
326	sp|O75822|EIF3J_HUMAN	7	4	-11.2095	0.0218773	0.5969	0.387273	0.0618582	0.624137	1.2086	['O75822']	EIF3J
2761	sp|Q96T88|UHRF1_HUMAN	18	6	#NAME?	0.0219123	0.751444	0.57142	0.0619078	0.395114	1.20825	['Q96T88']	UHRF1
2222	sp|Q71UM5|RS27L_HUMAN	3	2	-111.514	0.0219399	0.581404	1.08231	0.0619368	-0.896496	1.20805	['Q71UM5']	RPS27L
1975	sp|Q15746|MYLK_HUMAN	32	13	-8.304	0.0219904	0.356086	0.538492	0.0620302	-0.596699	1.2074	['Q15746']	MYLK
2101	sp|Q5T2N8|ATD3C_HUMAN	6	2	#NAME?	0.02203	0.521843	1.09363	0.0620924	-1.06744	1.20696	['Q5T2N8']	ATAD3C
163	sp|O43272|PROD_HUMAN	4	2	-13.7763	0.0220529	0.498826	0.706908	0.0621077	-0.502986	1.20685	['O43272']	PRODH
3506	sp|Q9Y5I1|PCDAB_HUMAN	2	2	#NAME?	0.0220803	0.580801	0.460491	0.062124	0.334873	1.20674	['Q9Y5I1']	PCDHA11
2965	sp|Q9H173|SIL1_HUMAN	4	2	-7.36204	0.0220936	0.388247	0.426298	0.062124	-0.134886	1.20674	['Q9H173']	SIL1
1024	sp|P35052|GPC1_HUMAN	5	4	-8.15947	0.0223767	0.899583	0.660944	0.0628227	0.444727	1.20188	['P35052']	GPC1
155	sp|O43169|CYB5B_HUMAN	5	3	4.37648	0.0223774	0.39582	1.10783	0.0628227	-1.48482	1.20188	['O43169']	CYB5B
249	sp|O60812|HNRCL_HUMAN	8	3	-6.70574	0.022429	1.06637	0.937764	0.0629178	0.185408	1.20123	['O60812']	HNRNPCL1
1347	sp|P55209|NP1L1_HUMAN	4	2	-0.256878	0.0224894	0.505305	1.05588	0.0630378	-1.06323	1.2004	['P55209']	NAP1L1
2431	sp|Q8NCH0|CHSTE_HUMAN	6	4	-5.98129	0.0225893	0.504734	0.713679	0.0632679	-0.499754	1.19882	['Q8NCH0']	CHST14
1407	sp|P61086|UBE2K_HUMAN	4	3	2.86385	0.0226946	0.727189	0.408	0.0635128	0.833762	1.19714	['P61086']	UBE2K
482	sp|P03915|NU5M_HUMAN	3	2	-14.8497	0.0227616	0.658982	0.433686	0.0636112	0.603589	1.19647	['P03915']	MT-ND5
1048	sp|P35610|SOAT1_HUMAN	5	4	3.35339	0.0227974	0.482316	0.414257	0.0636112	0.219453	1.19647	['P35610']	SOAT1
1113	sp|P41250|SYG_HUMAN	13	5	-14.6084	0.0228087	0.549239	0.225421	0.0636112	1.28482	1.19647	['P41250']	GARS
3475	sp|Q9Y3F4|STRAP_HUMAN	10	6	#NAME?	0.0228165	0.438272	0.28692	0.0636112	0.611179	1.19647	['Q9Y3F4']	STRAP
1775	sp|Q13402|MYO7A_HUMAN	3	3	#NAME?	0.0228192	0.404578	0.444457	0.0636112	-0.135626	1.19647	['Q13402']	MYO7A
869	sp|P23634|AT2B4_HUMAN	24	9	-9.07778	0.0229642	0.300975	0.452665	0.0639654	-0.5888	1.19406	['P23634']	ATP2B4
1169	sp|P46977|STT3A_HUMAN	17	7	-7.98985	0.0230216	0.800631	0.494688	0.0640665	0.694618	1.19337	['P46977']	STT3A
3297	sp|Q9UGV2|NDRG3_HUMAN	4	2	#NAME?	0.0230366	0.775817	0.526958	0.0640665	0.558029	1.19337	['Q9UGV2']	NDRG3
308	sp|O75533|SF3B1_HUMAN	33	13	#NAME?	0.023071	0.481228	0.388646	0.0641122	0.308263	1.19306	['O75533']	SF3B1
1329	sp|P54709|AT1B3_HUMAN	9	3	#NAME?	0.0232244	1.03848	0.399828	0.064488	1.37703	1.19052	['P54709']	ATP1B3
987	sp|P30837|AL1B1_HUMAN	17	7	-3.63443	0.023316	0.333925	0.375611	0.064692	-0.169719	1.18915	['P30837']	ALDH1B1
2775	sp|Q99519|NEUR1_HUMAN	7	5	#NAME?	0.023374	0.455251	0.653374	0.0648023	-0.521247	1.18841	['Q99519']	NEU1
1077	sp|P37268|FDFT_HUMAN	9	4	#NAME?	0.0234436	0.384144	0.349401	0.0649446	0.136764	1.18746	['P37268']	FDFT1
483	sp|P03928|ATP8_HUMAN	2	2	-124.635	0.0235454	0.541471	1.04692	0.065176	-0.951192	1.18591	['P03928']	MT-ATP8
3442	sp|Q9Y2W1|TR150_HUMAN	20	14	#NAME?	0.023572	0.994216	0.509217	0.0651987	0.965277	1.18576	['Q9Y2W1']	THRAP3
47	sp|O00303|EIF3F_HUMAN	8	5	#NAME?	0.0237372	0.447898	0.524226	0.0656047	-0.227018	1.18306	['O00303']	EIF3F
1217	sp|P49736|MCM2_HUMAN	19	11	-9.41147	0.0238857	0.635898	0.466262	0.0659638	0.447655	1.18069	['P49736']	MCM2
1683	sp|Q08257|QOR_HUMAN	9	6	#NAME?	0.0239732	0.166811	0.255656	0.066154	-0.615988	1.17944	['Q08257']	CRYZ
2207	sp|Q6ZRP7|QSOX2_HUMAN	3	2	-11.0621	0.02403	0.247391	0.403366	0.0662595	-0.705297	1.17875	['Q6ZRP7']	QSOX2
297	sp|O75475|PSIP1_HUMAN	10	4	-17.6203	0.0241162	0.391418	0.416518	0.0664457	-0.0896685	1.17753	['O75475']	PSIP1
1770	sp|Q13310|PABP4_HUMAN	15	6	-6.35565	0.024178	0.594176	0.561086	0.0665645	0.0826698	1.17676	['Q13310']	PABPC4
1640	sp|Q04656|ATP7A_HUMAN	2	2	#NAME?	0.0242949	0.462264	0.332335	0.0668344	0.476078	1.175	['Q04656']	ATP7A
2973	sp|Q9H299|SH3L3_HUMAN	2	2	#NAME?	0.0244746	1.1425	0.476213	0.0672768	1.26251	1.17213	['Q9H299']	SH3BGRL3
836	sp|P21964|COMT_HUMAN	8	4	#NAME?	0.0244992	1.05208	0.952978	0.0672923	0.142728	1.17203	['P21964']	COMT
3353	sp|Q9UL25|RAB21_HUMAN	8	4	-6.3705	0.0245679	0.411991	1.07018	0.0674291	-1.37717	1.17115	['Q9UL25']	RAB21
1670	sp|Q07065|CKAP4_HUMAN	33	14	-6.13652	0.0249272	1.03763	0.96327	0.0683623	0.107277	1.16518	['Q07065']	CKAP4
458	sp|P00568|KAD1_HUMAN	3	2	#NAME?	0.024969	0.449299	0.22835	0.0683725	0.976432	1.16512	['P00568']	AK1
1453	sp|P62244|RS15A_HUMAN	4	2	-0.866859	0.0249693	1.10359	0.901514	0.0683725	0.291789	1.16512	['P62244']	RPS15A
893	sp|P25774|CATS_HUMAN	2	2	#NAME?	0.0250186	0.570962	0.287824	0.0684342	0.988207	1.16473	['P25774']	CTSS
1607	sp|Q01813|PFKAP_HUMAN	17	7	0.000758582	0.0250303	0.550592	0.302524	0.0684342	0.863935	1.16473	['Q01813']	PFKP
941	sp|P29144|TPP2_HUMAN	26	14	#NAME?	0.0250935	0.254105	0.331494	0.0685451	-0.383557	1.16402	['P29144']	TPP2
1901	sp|Q14974|IMB1_HUMAN	20	6	-9.68901	0.0251094	0.196624	0.390024	0.0685451	-0.988123	1.16402	['Q14974']	KPNB1
3157	sp|Q9NVD7|PARVA_HUMAN	5	4	-11.904	0.0253194	0.708614	0.568622	0.0690652	0.317529	1.16074	['Q9NVD7']	PARVA
1095	sp|P40123|CAP2_HUMAN	3	2	#NAME?	0.0253923	0.598997	0.59537	0.069211	0.00876212	1.15982	['P40123']	CAP2
2908	sp|Q9BYG3|MK67I_HUMAN	9	4	#NAME?	0.025415	0.523331	0.342628	0.0692199	0.611082	1.15977	['Q9BYG3']	NIFK
1973	sp|Q15717|ELAV1_HUMAN	12	9	-6.27055	0.0254833	0.875397	1.14703	0.0693528	-0.389895	1.15894	['Q15717']	ELAVL1
2549	sp|Q92575|UBXN4_HUMAN	5	3	#NAME?	0.0255959	0.572695	0.522884	0.069606	0.131275	1.15735	['Q92575']	UBXN4
123	sp|O15160|RPAC1_HUMAN	4	3	-10.0981	0.0256292	1.00712	0.707741	0.0696433	0.508942	1.15712	['O15160']	POLR1C
2671	sp|Q96F07|CYFP2_HUMAN	5	3	#NAME?	0.0257111	0.119468	0.174398	0.0698126	-0.545756	1.15607	['Q96F07']	CYFIP2
2391	sp|Q8N4C6|NIN_HUMAN	5	2	#NAME?	0.0257943	0.534691	0.43043	0.069985	0.312926	1.15499	['Q8N4C6']	NIN
2605	sp|Q969H8|CS010_HUMAN	6	3	-141.221	0.0258196	1.18313	0.795198	0.0700003	0.573222	1.1549	['Q969H8']	C19orf10
3498	sp|Q9Y508|RN114_HUMAN	3	3	-3.21258	0.0258532	0.383419	0.231711	0.0700379	0.726595	1.15467	['Q9Y508']	RNF114
785	sp|P18583|SON_HUMAN	22	14	-74.9311	0.0259125	0.377105	0.394605	0.0701451	-0.0654446	1.154	['P18583']	SON
2048	sp|Q4ZIN3|MBRL_HUMAN	2	2	-140.408	0.0259403	0.538918	0.540992	0.0701669	-0.00554297	1.15387	['Q4ZIN3']	TMEM259
1385	sp|P60033|CD81_HUMAN	3	2	-12.5911	0.0261166	0.403983	1.07646	0.0705808	-1.41393	1.15131	['P60033']	CD81
3076	sp|Q9NP73|ALG13_HUMAN	4	4	#NAME?	0.0261329	0.423236	0.394766	0.0705808	0.100466	1.15131	['Q9NP73']	ALG13
3312	sp|Q9UHQ9|NB5R1_HUMAN	7	5	-6.10952	0.0262135	0.441104	0.603721	0.0707178	-0.452764	1.15047	['Q9UHQ9']	CYB5R1
2441	sp|Q8NF50|DOCK8_HUMAN	2	2	#NAME?	0.0262235	1.12098	0.367743	0.0707178	1.608	1.15047	['Q8NF50']	DOCK8
2643	sp|Q96CM8|ACSF2_HUMAN	5	3	-81.4751	0.0262772	0.44231	0.551337	0.0708092	-0.317878	1.14991	['Q96CM8']	ACSF2
2128	sp|Q5ZPR3|CD276_HUMAN	8	3	-10.2989	0.0263829	0.891949	1.11137	0.0710402	-0.317301	1.1485	['Q5ZPR3']	CD276
3125	sp|Q9NS25|SPNXB_HUMAN	5	3	-2.44825	0.0264652	0.883255	1.10326	0.0712078	-0.320872	1.14747	['Q9NS25']	SPANXB1
1912	sp|Q15020|SART3_HUMAN	13	5	-12.2094	0.0267532	0.331675	0.268905	0.0719282	0.302671	1.1431	['Q15020']	SART3
1755	sp|Q13177|PAK2_HUMAN	6	3	-6.61009	0.0269261	0.347203	0.21144	0.0723384	0.715533	1.14063	['Q13177']	PAK2
910	sp|P26640|SYVC_HUMAN	15	9	-11.5414	0.0272092	0.439481	0.333801	0.0730439	0.396812	1.13642	['P26640']	VARS
1315	sp|P53794|SC5A3_HUMAN	4	3	#NAME?	0.0272551	0.359561	0.456258	0.0730683	-0.343611	1.13627	['P53794']	SLC5A3
1657	sp|Q06124|PTN11_HUMAN	2	2	#NAME?	0.0272868	0.529388	0.363551	0.0730683	0.542168	1.13627	['Q06124']	PTPN11
2183	sp|Q6R2W3|SCND3_HUMAN	2	2	#NAME?	0.0272949	0.187851	0.150653	0.0730683	0.318359	1.13627	['Q6R2W3']	ZBED9
2189	sp|Q6UN15|FIP1_HUMAN	5	2	-3.98967	0.0273005	1.07322	0.619588	0.0730683	0.792565	1.13627	['Q6UN15']	FIP1L1
3456	sp|Q9Y399|RT02_HUMAN	4	3	#NAME?	0.0275317	0.377579	0.557828	0.0735648	-0.563042	1.13333	['Q9Y399']	MRPS2
451	sp|P00390|GSHR_HUMAN	9	3	-1.1128	0.0275421	0.610741	0.424341	0.0735648	0.525335	1.13333	['P00390']	GSR
79	sp|O14617|AP3D1_HUMAN	6	3	-4.8725	0.027548	0.49936	0.244153	0.0735648	1.0323	1.13333	['O14617']	AP3D1
1548	sp|P78406|RAE1L_HUMAN	7	6	-11.6866	0.0276015	0.319497	0.562738	0.0736307	-0.816664	1.13294	['P78406']	RAE1
2425	sp|Q8NBU5|ATAD1_HUMAN	8	4	#NAME?	0.0276141	0.416721	0.567313	0.0736307	-0.445064	1.13294	['Q8NBU5']	ATAD1
1527	sp|P67870|CSK2B_HUMAN	6	4	-8.04366	0.0277372	0.562101	0.457124	0.0739035	0.298244	1.13133	['P67870']	CSNK2B
2613	sp|Q969X6|CIR1A_HUMAN	6	2	-56.8604	0.0279045	0.187165	0.309426	0.0742937	-0.725286	1.12905	['Q969X6']	CIRH1A
1723	sp|Q12888|TP53B_HUMAN	28	14	-15.2268	0.0279699	0.374061	0.475547	0.0744121	-0.346316	1.12836	['Q12888']	TP53BP1
204	sp|O43759|SNG1_HUMAN	2	2	#NAME?	0.0280037	0.447936	0.989602	0.0744463	-1.14356	1.12816	['O43759']	SYNGR1
2772	sp|Q99470|SDF2_HUMAN	4	3	#NAME?	0.028104	0.629274	0.56676	0.0746532	0.150951	1.12695	['Q99470']	SDF2
1047	sp|P35609|ACTN2_HUMAN	15	3	2.73473	0.0281458	1.03595	0.964195	0.0746532	0.103556	1.12695	['P35609']	ACTN2
1679	sp|Q08043|ACTN3_HUMAN	10	3	6.52276	0.0281458	1.03907	0.961101	0.0746532	0.112537	1.12695	['Q08043']	ACTN3
1387	sp|P60228|EIF3E_HUMAN	10	4	-10.1139	0.0281655	0.246091	0.429659	0.0746532	-0.803998	1.12695	['P60228']	EIF3E
1297	sp|P52799|EFNB2_HUMAN	5	3	-9.33476	0.0282353	0.673395	0.490913	0.0747825	0.455987	1.1262	['P52799']	EFNB2
3263	sp|Q9UBC2|EP15R_HUMAN	7	4	-4.10901	0.0287977	0.688372	0.512964	0.0761742	0.42433	1.11819	['Q9UBC2']	EPS15L1
3135	sp|Q9NTJ3|SMC4_HUMAN	15	7	-22.7296	0.0288036	0.176117	0.182835	0.0761742	-0.0540073	1.11819	['Q9NTJ3']	SMC4
2900	sp|Q9BY89|K1671_HUMAN	2	2	#NAME?	0.0288732	0.485508	0.485508	0.0763015	0	1.11747	['Q9BY89']	KIAA1671
2117	sp|Q5UCC4|EMC10_HUMAN	2	2	#NAME?	0.0289379	0.595273	1.018	0.0764157	-0.774109	1.11682	['Q5UCC4']	EMC10
1296	sp|P52790|HXK3_HUMAN	3	2	#NAME?	0.0294988	0.362969	1.26853	0.0777742	-1.80524	1.10916	['P52790']	HK3
1868	sp|Q14444|CAPR1_HUMAN	11	6	-13.1838	0.0295156	0.372538	0.66563	0.0777742	-0.837334	1.10916	['Q14444']	CAPRIN1
1111	sp|P41226|UBA7_HUMAN	3	3	#NAME?	0.0295331	0.390881	0.372129	0.0777742	0.0709252	1.10916	['P41226']	UBA7
1406	sp|P61081|UBC12_HUMAN	3	2	#NAME?	0.0295398	0.527056	0.267451	0.0777742	0.978682	1.10916	['P61081']	UBE2M
170	sp|O43347|MSI1H_HUMAN	2	2	#NAME?	0.0295911	0.324213	0.573337	0.0778518	-0.822444	1.10873	['O43347']	MSI1
1784	sp|Q13435|SF3B2_HUMAN	25	18	#NAME?	0.0298112	0.305261	0.426834	0.0783729	-0.483633	1.10583	['Q13435']	SF3B2
2640	sp|Q96C36|P5CR2_HUMAN	8	5	-15.1684	0.0301037	0.377842	0.471515	0.0790835	-0.319521	1.10191	['Q96C36']	PYCR2
3205	sp|Q9NYF8|BCLF1_HUMAN	18	9	-10.6135	0.0302753	0.390698	0.630158	0.0794753	-0.68966	1.09977	['Q9NYF8']	BCLAF1
3432	sp|Q9Y2Q3|GSTK1_HUMAN	9	6	#NAME?	0.0303885	0.489519	1.05315	0.0797139	-1.10528	1.09847	['Q9Y2Q3']	GSTK1
2047	sp|Q4VXU2|PAP1L_HUMAN	4	2	1.24523	0.0304283	0.889759	0.193516	0.0797593	2.20097	1.09822	['Q4VXU2']	PABPC1L
1043	sp|P35573|GDE_HUMAN	2	2	#NAME?	0.030522	0.160288	0.182415	0.0799461	-0.186558	1.0972	['P35573']	AGL
1838	sp|Q14137|BOP1_HUMAN	8	4	#NAME?	0.0306575	0.746074	0.614818	0.0802419	0.27916	1.0956	['Q14137']	BOP1
3492	sp|Q9Y4K1|AIM1_HUMAN	2	2	#NAME?	0.0307466	0.426381	0.453349	0.0804159	-0.0884803	1.09466	['Q9Y4K1']	AIM1
143	sp|O15381|NVL_HUMAN	2	2	#NAME?	0.0309634	0.464596	0.464596	0.0809234	0	1.09193	['O15381']	NVL
2741	sp|Q96RE7|NACC1_HUMAN	4	2	#NAME?	0.0310481	0.302443	0.319388	0.0810852	-0.0786467	1.09106	['Q96RE7']	NACC1
3014	sp|Q9H6Z4|RANB3_HUMAN	2	2	#NAME?	0.0311981	0.446313	0.446313	0.0814173	-3.55271e-14	1.08928	['Q9H6Z4']	RANBP3
2794	sp|Q99729|ROAA_HUMAN	8	4	-4.46909	0.0312488	0.808089	1.2317	0.0814898	-0.60806	1.0889	['Q99729']	HNRNPAB
779	sp|P18077|RL35A_HUMAN	6	4	-10.4043	0.0312982	1.02874	0.968013	0.0815586	0.087775	1.08853	['P18077']	RPL35A
2164	sp|Q6P1J9|CDC73_HUMAN	2	2	#NAME?	0.0314933	0.683961	1.07125	0.0820069	-0.647314	1.08615	['Q6P1J9']	CDC73
1010	sp|P32970|CD70_HUMAN	6	3	-8.66532	0.0315219	0.867145	1.12004	0.0820215	-0.369205	1.08607	['P32970']	CD70
114	sp|O15116|LSM1_HUMAN	2	2	#NAME?	0.0316567	0.354121	0.321928	0.082312	0.137506	1.08454	['O15116']	LSM1
139	sp|O15347|HMGB3_HUMAN	3	2	#NAME?	0.0317294	0.490452	0.178894	0.0823877	1.45501	1.08414	['O15347']	HMGB3
929	sp|P28070|PSB4_HUMAN	6	4	#NAME?	0.0317321	0.470249	0.277392	0.0823877	0.761502	1.08414	['P28070']	PSMB4
1299	sp|P52907|CAZA1_HUMAN	10	4	-9.24264	0.0320622	0.899717	1.10319	0.0831188	-0.294141	1.0803	['P52907']	CAPZA1
1751	sp|Q13151|ROA0_HUMAN	9	3	-13.0542	0.0320644	0.384633	0.407267	0.0831188	-0.0824958	1.0803	['Q13151']	HNRNPA0
2823	sp|Q9BRJ2|RM45_HUMAN	3	2	#NAME?	0.0320907	0.60835	0.579003	0.0831188	0.0713312	1.0803	['Q9BRJ2']	MRPL45
3385	sp|Q9UNN8|EPCR_HUMAN	2	2	-0.429245	0.0321072	0.208773	0.379675	0.0831188	-0.862828	1.0803	['Q9UNN8']	PROCR
2150	sp|Q6KB66|K2C80_HUMAN	3	3	#NAME?	0.0321378	0.296686	0.203904	0.0831375	0.541047	1.0802	['Q6KB66']	KRT80
2685	sp|Q96GQ5|CP058_HUMAN	2	2	#NAME?	0.0322456	0.481826	0.35236	0.0833557	0.451464	1.07906	['Q96GQ5']	C16orf58
2704	sp|Q96JC1|VPS39_HUMAN	2	2	-3.93591	0.0323029	0.651963	0.300095	0.0834009	1.11937	1.07883	['Q96JC1']	VPS39
1844	sp|Q14151|SAFB2_HUMAN	15	7	#NAME?	0.0323099	0.465017	0.433242	0.0834009	0.102112	1.07883	['Q14151']	SAFB2
1804	sp|Q13573|SNW1_HUMAN	9	6	#NAME?	0.0324008	0.15517	0.186479	0.0835749	-0.265162	1.07792	['Q13573']	SNW1
2481	sp|Q8TD16|BICD2_HUMAN	4	2	#NAME?	0.0325236	0.413644	0.390776	0.0837752	0.0820459	1.07688	['Q8TD16']	BICD2
1706	sp|Q10713|MPPA_HUMAN	12	3	1.86404	0.0325256	0.234532	0.430316	0.0837752	-0.875613	1.07688	['Q10713']	PMPCA
1906	sp|Q15006|EMC2_HUMAN	4	3	#NAME?	0.0326135	0.943805	1.05955	0.0839407	-0.166894	1.07603	['Q15006']	EMC2
2156	sp|Q6NUP7|PP4R4_HUMAN	2	2	#NAME?	0.0326455	0.326911	0.182666	0.0839623	0.83969	1.07592	['Q6NUP7']	PPP4R4
3162	sp|Q9NVJ2|ARL8B_HUMAN	6	2	#NAME?	0.0328201	0.315696	0.363374	0.0843504	-0.202921	1.07391	['Q9NVJ2']	ARL8B
1953	sp|Q15404|RSU1_HUMAN	2	2	#NAME?	0.0328988	0.408918	0.534744	0.0844918	-0.387035	1.07319	['Q15404']	RSU1
2346	sp|Q8IXM2|BAP18_HUMAN	2	2	-8.39105	0.0329303	0.3868	0.663514	0.0845117	-0.778542	1.07308	['Q8IXM2']	BAP18
781	sp|P18085|ARF4_HUMAN	8	3	-5.36006	0.0330411	0.500299	1.12302	0.0847349	-1.16652	1.07194	['P18085']	ARF4
3315	sp|Q9UHW9|S12A6_HUMAN	2	2	#NAME?	0.0331642	0.220741	0.403952	0.0849893	-0.871828	1.07064	['Q9UHW9']	SLC12A6
2915	sp|Q9BZ67|FRMD8_HUMAN;sp|Q9BZ68|FR8P1_HUMAN	2	2	#NAME?	0.033281	0.444919	0.342125	0.0852163	0.379019	1.06948	['Q9BZ67', 'Q9BZ68']	FRMD8
1118	sp|P42166|LAP2A_HUMAN	22	9	-4.43049	0.0333007	0.510998	0.305985	0.0852163	0.739857	1.06948	['P42166']	TMPO
313	sp|O75608|LYPA1_HUMAN	3	3	-1.62861	0.0333552	0.546052	0.601675	0.0852944	-0.139946	1.06908	['O75608']	LYPLA1
430	sp|O95819|M4K4_HUMAN	3	2	#NAME?	0.0334311	0.568972	1.04337	0.0854271	-0.874815	1.0684	['O95819']	MAP4K4
43	sp|O00267|SPT5H_HUMAN	11	6	#NAME?	0.0335702	0.553817	0.385944	0.0856672	0.521019	1.06719	['O00267']	SUPT5H
1921	sp|Q15061|WDR43_HUMAN	7	3	-6.10541	0.0335938	0.280016	0.371225	0.0856672	-0.406782	1.06719	['Q15061']	WDR43
799	sp|P19387|RPB3_HUMAN	4	2	#NAME?	0.0336212	0.412034	0.401755	0.0856672	0.0364458	1.06719	['P19387']	POLR2C
370	sp|O94915|FRYL_HUMAN	3	2	-3.87672	0.0336214	0.467357	0.337341	0.0856672	0.470316	1.06719	['O94915']	FRYL
3134	sp|Q9NTI5|PDS5B_HUMAN	15	8	#NAME?	0.0337083	0.647563	0.438129	0.0857857	0.563667	1.06658	['Q9NTI5']	PDS5B
2240	sp|Q7L8L6|FAKD5_HUMAN	2	2	#NAME?	0.0337162	0.511955	0.463677	0.0857857	0.142896	1.06658	['Q7L8L6']	FASTKD5
2022	sp|Q16851|UGPA_HUMAN	4	3	#NAME?	0.0337609	0.42206	0.272342	0.0858382	0.632031	1.06632	['Q16851']	UGP2
3371	sp|Q9UMS0|NFU1_HUMAN	4	3	-12.3362	0.0339062	0.82316	1.22003	0.0861049	-0.567674	1.06497	['Q9UMS0']	NFU1
2233	sp|Q7L311|ARMX2_HUMAN	2	2	#NAME?	0.033916	0.398776	0.525424	0.0861049	-0.397905	1.06497	['Q7L311']	ARMCX2
843	sp|P22234|PUR6_HUMAN	10	5	-8.13942	0.0339384	0.504107	0.215782	0.0861049	1.22415	1.06497	['P22234']	PAICS
2894	sp|Q9BXS6|NUSAP_HUMAN	3	3	#NAME?	0.0339774	0.312445	0.278417	0.0861422	0.166354	1.06478	['Q9BXS6']	NUSAP1
2940	sp|Q9GZT3|SLIRP_HUMAN	4	2	#NAME?	0.034018	0.339915	1.14204	0.0861839	-1.74836	1.06457	['Q9GZT3']	SLIRP
3375	sp|Q9UMY1|NOL7_HUMAN	3	3	#NAME?	0.0341524	0.317374	0.338631	0.0864627	-0.0935305	1.06317	['Q9UMY1']	NOL7
1289	sp|P52597|HNRPF_HUMAN	12	6	-4.79439	0.0346446	0.360254	1.0394	0.0876463	-1.52866	1.05727	['P52597']	HNRNPF
2617	sp|Q96A23|CPNE4_HUMAN	2	2	#NAME?	0.0347272	0.65244	1.05021	0.0877207	-0.686764	1.0569	['Q96A23']	CPNE4
2479	sp|Q8TCT9|HM13_HUMAN	9	4	-4.92372	0.0347558	0.870234	1.1453	0.0877207	-0.396252	1.0569	['Q8TCT9']	HM13
3468	sp|Q9Y3D2|MSRB2_HUMAN	3	3	#NAME?	0.0347621	0.500998	0.520779	0.0877207	-0.0558655	1.0569	['Q9Y3D2']	MSRB2
1442	sp|P61978|HNRPK_HUMAN	21	12	#NAME?	0.0347726	1.08966	0.916428	0.0877207	0.249784	1.0569	['P61978']	HNRNPK
2651	sp|Q96DH6|MSI2H_HUMAN	2	2	#NAME?	0.0350541	0.35935	0.699402	0.0883682	-0.960734	1.0537	['Q96DH6']	MSI2
2448	sp|Q8NFH5|NUP53_HUMAN	2	2	-7.35313	0.03517	0.560954	0.517947	0.0885974	0.115078	1.05258	['Q8NFH5']	NUP35
191	sp|O43674|NDUB5_HUMAN	2	2	#NAME?	0.035303	0.576841	1.06156	0.0888697	-0.879935	1.05125	['O43674']	NDUFB5
1553	sp|P82094|TMF1_HUMAN	11	3	-13.2025	0.0354804	0.448369	0.394543	0.0892531	0.184504	1.04938	['P82094']	TMF1
1443	sp|P61981|1433G_HUMAN	10	6	-2.47864	0.0362061	1.14063	0.881498	0.0909814	0.371808	1.04105	['P61981']	YWHAG
1631	sp|Q03013|GSTM4_HUMAN	2	2	#NAME?	0.0362442	0.389049	0.389049	0.0909814	0	1.04105	['Q03013']	GSTM4
1156	sp|P46439|GSTM5_HUMAN	2	2	#NAME?	0.0362442	0.389049	0.389049	0.0909814	0	1.04105	['P46439']	GSTM5
1629	sp|Q02978|M2OM_HUMAN	11	8	-17.5195	0.0363031	0.98032	1.01802	0.091065	-0.054446	1.04065	['Q02978']	SLC25A11
3097	sp|Q9NQW1|SC31B_HUMAN	2	2	-6.57059	0.0363934	0.239159	0.367351	0.0912272	-0.619187	1.03988	['Q9NQW1']	SEC31B
312	sp|O75607|NPM3_HUMAN	2	2	#NAME?	0.0364825	0.980561	0.383875	0.0912597	1.35297	1.03972	['O75607']	NPM3
2385	sp|Q8N3D4|EH1L1_HUMAN	2	2	#NAME?	0.0364828	0.534315	0.385892	0.0912597	0.469492	1.03972	['Q8N3D4']	EHBP1L1
353	sp|O94766|B3GA3_HUMAN	2	2	#NAME?	0.0364834	0.429225	0.429225	0.0912597	0	1.03972	['O94766']	B3GAT3
3266	sp|Q9UBF2|COPG2_HUMAN	3	3	-3.88334	0.0365167	0.567212	0.301394	0.0912789	0.912239	1.03963	['Q9UBF2']	COPG2
2875	sp|Q9BVT8|TMUB1_HUMAN	3	2	#NAME?	0.0365743	0.425561	0.441955	0.0913587	-0.0545327	1.03925	['Q9BVT8']	TMUB1
2871	sp|Q9BVK2|ALG8_HUMAN	2	2	#NAME?	0.0366037	0.496062	0.487092	0.0913679	0.0263271	1.03921	['Q9BVK2']	ALG8
2834	sp|Q9BSJ8|ESYT1_HUMAN	33	14	-4.6002	0.036787	0.290006	0.412254	0.0917611	-0.507447	1.03734	['Q9BSJ8']	ESYT1
2187	sp|Q6TDU7|CASC1_HUMAN	2	2	#NAME?	0.036834	1.39249	0.381778	0.0918139	1.86686	1.03709	['Q6TDU7']	CASC1
2365	sp|Q8IZH2|XRN1_HUMAN	2	2	#NAME?	0.0369712	0.491293	0.25278	0.0920914	0.958698	1.03578	['Q8IZH2']	XRN1
2654	sp|Q96DT5|DYH11_HUMAN	4	2	#NAME?	0.0371721	0.336391	1.07013	0.0925271	-1.66957	1.03373	['Q96DT5']	DNAH11
2905	sp|Q9BYD2|RM09_HUMAN	6	4	#NAME?	0.0373136	0.492038	0.54782	0.0928043	-0.154932	1.03243	['Q9BYD2']	MRPL9
129	sp|O15226|NKRF_HUMAN	3	3	#NAME?	0.0373357	0.599525	0.456887	0.0928043	0.391983	1.03243	['O15226']	NKRF
1486	sp|P62841|RS15_HUMAN	3	2	-3.59932	0.0373852	0.948721	0.445768	0.0928626	1.08969	1.03216	['P62841']	RPS15
3467	sp|Q9Y3C6|PPIL1_HUMAN	2	2	#NAME?	0.037479	0.265701	0.395435	0.0930306	-0.573637	1.03137	['Q9Y3C6']	PPIL1
1811	sp|Q13616|CUL1_HUMAN	6	3	#NAME?	0.0375639	0.347999	0.237553	0.0931762	0.550831	1.03069	['Q13616']	CUL1
2567	sp|Q92785|REQU_HUMAN	5	2	#NAME?	0.037697	0.438302	0.436216	0.0934412	0.00688278	1.02946	['Q92785']	DPF2
2747	sp|Q96S55|WRIP1_HUMAN	3	2	#NAME?	0.0377398	0.201412	0.0748767	0.0934822	1.42756	1.02927	['Q96S55']	WRNIP1
1358	sp|P55884|EIF3B_HUMAN	18	8	-8.85989	0.0377749	0.635463	0.492496	0.0935042	0.367694	1.02917	['P55884']	EIF3B
1945	sp|Q15369|ELOC_HUMAN	3	2	#NAME?	0.038026	0.916299	1.07713	0.09406	-0.233302	1.02659	['Q15369']	TCEB1
528	sp|P06454|PTMA_HUMAN	4	2	6.08704	0.0381004	1.33116	0.696033	0.0941677	0.935453	1.0261	['P06454']	PTMA
796	sp|P19174|PLCG1_HUMAN	2	2	#NAME?	0.0381224	0.40029	0.231192	0.0941677	0.791956	1.0261	['P19174']	PLCG1
1434	sp|P61916|NPC2_HUMAN	5	3	#NAME?	0.0382031	0.313991	1.05248	0.0943014	-1.74499	1.02548	['P61916']	NPC2
1188	sp|P48643|TCPE_HUMAN	24	12	-5.62837	0.0383553	0.297042	0.446367	0.0946114	-0.587563	1.02406	['P48643']	CCT5
791	sp|P18858|DNLI1_HUMAN	2	2	-9.73385	0.0383827	0.60236	0.314812	0.0946135	0.936136	1.02405	['P18858']	LIG1
3191	sp|Q9NXG2|THUM1_HUMAN	3	2	#NAME?	0.0386452	0.459607	0.329378	0.0951945	0.480655	1.02139	['Q9NXG2']	THUMPD1
2190	sp|Q6UVY6|MOXD1_HUMAN	3	2	#NAME?	0.0386924	0.177227	0.363952	0.095245	-1.03815	1.02116	['Q6UVY6']	MOXD1
3326	sp|Q9UIQ6|LCAP_HUMAN	18	8	-9.65492	0.0387974	0.387912	0.374461	0.0954373	0.0509111	1.02028	['Q9UIQ6']	LNPEP
90	sp|O14773|TPP1_HUMAN	8	3	-8.85914	0.0393214	0.927061	1.08701	0.0966594	-0.22963	1.01476	['O14773']	TPP1
3188	sp|Q9NXA8|SIR5_HUMAN	2	2	#NAME?	0.0394717	0.460471	0.708802	0.096962	-0.622272	1.0134	['Q9NXA8']	SIRT5
3477	sp|Q9Y3L5|RAP2C_HUMAN	3	2	0.286065	0.0395104	0.897787	1.12055	0.09699	-0.319759	1.01327	['Q9Y3L5']	RAP2C
2261	sp|Q7Z4H8|KDEL2_HUMAN	2	2	#NAME?	0.0396732	0.458115	0.999227	0.0973226	-1.1251	1.01179	['Q7Z4H8']	KDELC2
2061	sp|Q56VL3|OCAD2_HUMAN	9	6	-5.00816	0.0397912	0.84677	1.16965	0.0975178	-0.466031	1.01092	['Q56VL3']	OCIAD2
2452	sp|Q8NFW8|NEUA_HUMAN	9	7	-89.1931	0.0398076	0.663445	0.569275	0.0975178	0.220852	1.01092	['Q8NFW8']	CMAS
1178	sp|P48059|LIMS1_HUMAN	2	2	#NAME?	0.039952	0.447394	0.652989	0.0978041	-0.545515	1.00964	['P48059']	LIMS1
3400	sp|Q9UPV0|CE164_HUMAN	2	2	#NAME?	0.0404413	0.274416	0.255778	0.0989339	0.101473	1.00466	['Q9UPV0']	CEP164
2517	sp|Q8WW12|PCNP_HUMAN	2	2	#NAME?	0.0406823	0.60523	0.287546	0.0994176	1.07369	1.00254	['Q8WW12']	PCNP
3370	sp|Q9UMN6|KMT2B_HUMAN	3	2	#NAME?	0.040695	0.306984	0.127915	0.0994176	1.26298	1.00254	['Q9UMN6']	KMT2B
1036	sp|P35268|RL22_HUMAN	5	3	1.0945	0.0409324	1.01692	0.342127	0.099929	1.5716	1.00031	['P35268']	RPL22
3106	sp|Q9NR31|SAR1A_HUMAN	5	2	0.901124	0.0410443	0.742865	0.417011	0.100133	0.833017	0.999421	['Q9NR31']	SAR1A
662	sp|P11586|C1TC_HUMAN	15	8	-3.34147	0.0411769	0.684139	0.418964	0.100388	0.707462	0.998318	['P11586']	MTHFD1
2677	sp|Q96G01|BICD1_HUMAN	4	3	-5.83013	0.0412583	0.274563	0.0834323	0.100518	1.71846	0.997757	['Q96G01']	BICD1
1166	sp|P46939|UTRO_HUMAN	24	15	-19.6974	0.0414251	0.359543	0.428408	0.100855	-0.252822	0.996303	['P46939']	UTRN
835	sp|P21926|CD9_HUMAN	3	2	-0.668671	0.0415622	1.0729	0.932053	0.10112	0.203033	0.995165	['P21926']	CD9
166	sp|O43292|GPAA1_HUMAN	4	3	#NAME?	0.0416218	0.611025	0.722783	0.101195	-0.242331	0.99484	['O43292']	GPAA1
318	sp|O75694|NU155_HUMAN	19	9	#NAME?	0.0418302	0.505375	0.355322	0.101632	0.508226	0.992968	['O75694']	NUP155
3530	sp|Q9Y653|GPR56_HUMAN	3	3	3.19784	0.0420918	0.536401	0.371788	0.102198	0.528833	0.990556	['Q9Y653']	GPR56
3519	sp|Q9Y5S9|RBM8A_HUMAN	6	4	#NAME?	0.0422705	0.644452	0.748675	0.102562	-0.216266	0.989013	['Q9Y5S9']	RBM8A
944	sp|P29323|EPHB2_HUMAN	4	3	#NAME?	0.0423389	0.731441	0.558938	0.102658	0.388053	0.988607	['P29323']	EPHB2
1140	sp|P43487|RANG_HUMAN	5	4	-3.37532	0.0424248	0.65095	0.447103	0.102779	0.541939	0.988098	['P43487']	RANBP1
1215	sp|P49720|PSB3_HUMAN	5	3	-90.1764	0.0424698	1.0757	0.92474	0.102779	0.218153	0.988098	['P49720']	PSMB3
2379	sp|Q8N1G4|LRC47_HUMAN	5	4	#NAME?	0.0425024	0.538557	0.287848	0.102779	0.903789	0.988098	['Q8N1G4']	LRRC47
1433	sp|P61812|TGFB2_HUMAN	2	2	#NAME?	0.0425041	0.41702	0.768541	0.102779	-0.882007	0.988098	['P61812']	TGFB2
1745	sp|Q13098|CSN1_HUMAN	7	4	#NAME?	0.042677	0.474039	0.549938	0.103127	-0.214265	0.98663	['Q13098']	GPS1
225	sp|O60287|NPA1P_HUMAN	5	4	#NAME?	0.0427403	0.208012	0.227562	0.103209	-0.129595	0.986281	['O60287']	URB1
537	sp|P06753|TPM3_HUMAN	12	4	-7.6914	0.0429115	0.293665	0.390416	0.103552	-0.41084	0.98484	['P06753']	TPM3
2732	sp|Q96Q15|SMG1_HUMAN	2	2	#NAME?	0.0430329	0.312967	0.92984	0.103775	-1.57097	0.983908	['Q96Q15']	SMG1
2771	sp|Q99460|PSMD1_HUMAN	24	12	-9.54194	0.0431435	0.126888	0.0985871	0.103971	0.36408	0.983088	['Q99460']	PSMD1
1861	sp|Q14258|TRI25_HUMAN	7	2	-13.0317	0.0432676	0.274547	0.13676	0.1042	1.0054	0.982134	['Q14258']	TRIM25
3271	sp|Q9UBP6|TRMB_HUMAN	2	2	3.52962	0.0433111	0.453925	0.323577	0.104221	0.488346	0.982045	['Q9UBP6']	METTL1
1291	sp|P52735|VAV2_HUMAN	3	2	7.53025	0.043335	0.579134	0.288194	0.104221	1.00686	0.982045	['P52735']	VAV2
1967	sp|Q15646|OASL_HUMAN	4	2	-4.81931	0.0434733	0.411991	0.378796	0.10445	0.121194	0.981092	['Q15646']	OASL
3419	sp|Q9Y287|ITM2B_HUMAN	7	6	-23.5583	0.043489	0.435984	0.395271	0.10445	0.141431	0.981092	['Q9Y287']	ITM2B
872	sp|P23921|RIR1_HUMAN	4	2	#NAME?	0.0435706	0.442821	0.919156	0.104575	-1.05359	0.980571	['P23921']	RRM1
2558	sp|Q92626|PXDN_HUMAN	13	9	-14.7555	0.0437843	0.081502	0.1738	0.105017	-1.09252	0.978739	['Q92626']	PXDN
2459	sp|Q8NI22|MCFD2_HUMAN	3	2	-0.876883	0.0438527	0.855071	1.17944	0.105111	-0.463987	0.978354	['Q8NI22']	MCFD2
1013	sp|P33240|CSTF2_HUMAN	7	3	-153.525	0.0439814	0.994981	1.00478	0.105348	-0.0141425	0.977373	['P33240']	CSTF2
1242	sp|P50570|DYN2_HUMAN	6	4	-4.57465	0.0441743	0.684831	0.447545	0.105739	0.613714	0.975765	['P50570']	DNM2
1370	sp|P56945|BCAR1_HUMAN	2	2	#NAME?	0.0444899	0.467865	0.518697	0.10636	-0.148801	0.973222	['P56945']	BCAR1
3000	sp|Q9H4L4|SENP3_HUMAN	2	2	#NAME?	0.0444935	0.270032	0.463865	0.10636	-0.780572	0.973222	['Q9H4L4']	SENP3
3497	sp|Q9Y4Z0|LSM4_HUMAN	3	2	#NAME?	0.0446022	0.557231	0.299199	0.106548	0.89717	0.972455	['Q9Y4Z0']	LSM4
2348	sp|Q8IXM6|NRM_HUMAN	2	2	#NAME?	0.0450446	0.520953	0.539143	0.107533	-0.0495146	0.96846	['Q8IXM6']	NRM
1155	sp|P46379|BAG6_HUMAN	6	2	-6.92525	0.0450841	0.187928	0.467273	0.107555	-1.31409	0.968371	['P46379']	BAG6
2424	sp|Q8NBT2|SPC24_HUMAN	2	2	#NAME?	0.04545	0.631569	0.402708	0.108355	0.649207	0.965151	['Q8NBT2']	SPC24
1509	sp|P63027|VAMP2_HUMAN	2	2	#NAME?	0.0455692	0.252343	0.298212	0.10856	-0.24095	0.964329	['P63027']	VAMP2
175	sp|O43402|EMC8_HUMAN	3	3	1.49283	0.0455972	0.344138	0.541406	0.10856	-0.653725	0.964329	['O43402']	EMC8
1430	sp|P61764|STXB1_HUMAN	6	3	-11.2128	0.0458047	0.56137	0.550487	0.108981	0.0282429	0.962648	['P61764']	STXBP1
2592	sp|Q92973|TNPO1_HUMAN	11	7	-8.7373	0.0458376	0.57613	0.376057	0.108987	0.615444	0.962626	['Q92973']	TNPO1
3394	sp|Q9UPN3|MACF1_HUMAN	91	51	#NAME?	0.0461603	0.100443	0.167923	0.109681	-0.741418	0.959869	['Q9UPN3']	MACF1
994	sp|P31930|QCR1_HUMAN	18	7	-15.7569	0.0463653	1.00025	0.99975	0.110023	0.000727473	0.958517	['P31930']	UQCRC1
1630	sp|Q03001|DYST_HUMAN	26	18	#NAME?	0.0463661	0.403603	0.461407	0.110023	-0.193104	0.958517	['Q03001']	DST
531	sp|P06703|S10A6_HUMAN	2	2	2.54483	0.0465426	0.513235	1.07411	0.110368	-1.06546	0.957157	['P06703']	S100A6
263	sp|O75071|EFC14_HUMAN	2	2	-5.14869	0.0467302	0.57774	0.422627	0.110739	0.451033	0.955699	['O75071']	EFCAB14
424	sp|O95782|AP2A1_HUMAN	32	14	-20.0264	0.0468341	0.422351	0.442351	0.110911	-0.0667473	0.955024	['O95782']	AP2A1
1982	sp|Q15836|VAMP3_HUMAN	3	2	-10.267	0.0469114	1.24054	0.806098	0.111021	0.621946	0.954597	['Q15836']	VAMP3
2119	sp|Q5VT25|MRCKA_HUMAN	3	2	#NAME?	0.0471263	0.486328	0.25637	0.111455	0.923704	0.9529	['Q5VT25']	CDC42BPA
1359	sp|P56134|ATPK_HUMAN	2	2	1.0411	0.0472408	0.650223	1.43688	0.111652	-1.14393	0.952135	['P56134']	ATP5J2
1046	sp|P35606|COPB2_HUMAN	20	11	-0.798477	0.0474855	0.366062	0.187246	0.112155	0.967155	0.95018	['P35606']	COPB2
1125	sp|P42696|RBM34_HUMAN	5	2	-10.0923	0.0477649	0.348021	0.553056	0.112638	-0.66825	0.948317	['P42696']	RBM34
1978	sp|Q15785|TOM34_HUMAN	6	3	-1.54538	0.0477748	0.620155	0.230261	0.112638	1.42936	0.948317	['Q15785']	TOMM34
2519	sp|Q8WWC4|CB047_HUMAN	2	2	-1.40156	0.0477847	0.482135	0.544887	0.112638	-0.176519	0.948317	['Q8WWC4']	C2orf47
1100	sp|P40616|ARL1_HUMAN	6	5	-132.788	0.047949	0.620465	0.54935	0.11295	0.175624	0.947113	['P40616']	ARL1
3281	sp|Q9UBV2|SE1L1_HUMAN	8	3	#NAME?	0.0480512	0.335981	0.400912	0.113116	-0.254908	0.946477	['Q9UBV2']	SEL1L
1202	sp|P49327|FAS_HUMAN	42	19	-5.82228	0.0482662	0.524243	0.482899	0.113547	0.118515	0.944824	['P49327']	FASN
3445	sp|Q9Y2X3|NOP58_HUMAN	17	8	-12.5356	0.0484645	0.974971	1.02683	0.113938	-0.0747626	0.943331	['Q9Y2X3']	NOP58
242	sp|O60701|UGDH_HUMAN	9	4	-3.62966	0.0485419	0.432667	0.218489	0.114045	0.985696	0.942925	['O60701']	UGDH
1007	sp|P32455|GBP1_HUMAN	4	2	-7.9399	0.0486801	0.449493	0.257966	0.114294	0.80112	0.941977	['P32455']	GBP1
2149	sp|Q6K0P9|IFIX_HUMAN	2	2	#NAME?	0.0487482	0.651913	0.20263	0.114378	1.68583	0.941657	['Q6K0P9']	PYHIN1
2756	sp|Q96T23|RSF1_HUMAN	7	4	#NAME?	0.0488347	0.299144	0.296192	0.114506	0.0143097	0.941173	['Q96T23']	RSF1
60	sp|O00541|PESC_HUMAN	12	5	-16.2733	0.0489039	0.414066	0.321137	0.114592	0.36667	0.940845	['O00541']	PES1
2268	sp|Q7Z6J6|FRMD5_HUMAN	4	2	#NAME?	0.0490356	0.414014	0.150241	0.114825	1.4624	0.939963	['Q7Z6J6']	FRMD5
2097	sp|Q5SSJ5|HP1B3_HUMAN	18	15	-10.5186	0.0490772	0.350338	0.449719	0.114847	-0.360275	0.93988	['Q5SSJ5']	HP1BP3
897	sp|P25789|PSA4_HUMAN	7	3	2.61364	0.0493521	1.2446	0.803672	0.115414	0.631007	0.93774	['P25789']	PSMA4
1897	sp|Q14839|CHD4_HUMAN	38	14	-14.2989	0.0494998	0.381895	0.417965	0.115684	-0.130204	0.936728	['Q14839']	CHD4
2631	sp|Q96BI1|S22AI_HUMAN	2	2	-13.2957	0.049764	0.946961	0.586912	0.116215	0.690161	0.934739	['Q96BI1']	SLC22A18
1400	sp|P61006|RAB8A_HUMAN	9	4	-9.25286	0.0498134	0.225974	0.388719	0.116215	-0.782575	0.934739	['P61006']	RAB8A
2664	sp|Q96EP5|DAZP1_HUMAN	3	3	#NAME?	0.049825	0.585912	0.747153	0.116215	-0.35072	0.934739	['Q96EP5']	DAZAP1
1298	sp|P52815|RM12_HUMAN	7	4	-13.9351	0.0499633	0.930551	1.07948	0.116461	-0.214175	0.933819	['P52815']	MRPL12
589	sp|P08727|K1C19_HUMAN	4	2	-14.5812	0.0501955	0.269641	0.70657	0.116849	-1.38979	0.932375	['P08727']	KRT19
1641	sp|Q04695|K1C17_HUMAN	3	2	-4.12116	0.0501955	0.269641	0.70657	0.116849	-1.38979	0.932375	['Q04695']	KRT17
2165	sp|Q6P1L8|RM14_HUMAN	4	2	#NAME?	0.0504131	0.601705	0.764389	0.117279	-0.345252	0.93078	['Q6P1L8']	MRPL14
3274	sp|Q9UBQ5|EIF3K_HUMAN	3	3	-14.739	0.0505342	0.505781	0.497709	0.117484	0.02321	0.930022	['Q9UBQ5']	EIF3K
2575	sp|Q92820|GGH_HUMAN	10	4	-19.2378	0.05067	0.929226	0.604515	0.117723	0.620252	0.92914	['Q92820']	GGH
631	sp|P10412|H14_HUMAN	8	4	-20.1147	0.0507438	0.247999	0.06459	0.117817	1.94095	0.928792	['P10412']	HIST1H1E
2887	sp|Q9BX84|TRPM6_HUMAN	2	2	#NAME?	0.0510128	0.476456	0.470075	0.118364	0.0194526	0.92678	['Q9BX84']	TRPM6
2755	sp|Q96SU4|OSBL9_HUMAN	2	2	-7.88411	0.0510744	0.264299	0.274218	0.118414	-0.0531542	0.926598	['Q96SU4']	OSBPL9
3253	sp|Q9P2J5|SYLC_HUMAN	16	9	-6.25536	0.0511007	0.679666	0.631128	0.118414	0.106895	0.926598	['Q9P2J5']	LARS
1933	sp|Q15181|IPYR_HUMAN	10	3	-6.99702	0.0511536	0.821236	0.491016	0.118459	0.742029	0.926431	['Q15181']	PPA1
2648	sp|Q96CX2|KCD12_HUMAN	4	4	#NAME?	0.0514433	0.252981	0.254949	0.119052	-0.011184	0.924262	['Q96CX2']	KCTD12
2078	sp|Q5JPE7|NOMO2_HUMAN	25	16	-13.5849	0.0515127	0.252004	0.386487	0.119136	-0.616973	0.923958	['Q5JPE7']	NOMO2
302	sp|O75506|HSBP1_HUMAN	2	2	#NAME?	0.0520063	0.45557	0.633429	0.120199	-0.475509	0.920099	['O75506']	HSBP1
3496	sp|Q9Y4W6|AFG32_HUMAN	20	11	-13.1996	0.0523324	0.330184	0.407655	0.120874	-0.304077	0.917666	['Q9Y4W6']	AFG3L2
2950	sp|Q9H089|LSG1_HUMAN	12	5	#NAME?	0.0524186	0.43101	0.393103	0.120941	0.132815	0.917425	['Q9H089']	LSG1
1012	sp|P33176|KINH_HUMAN	22	9	-9.96637	0.0524401	0.322579	0.159161	0.120941	1.01917	0.917425	['P33176']	KIF5B
1367	sp|P56545|CTBP2_HUMAN	6	3	-10.8981	0.0524635	0.306163	0.332258	0.120941	-0.118004	0.917425	['P56545']	CTBP2
2422	sp|Q8NBN3|TM87A_HUMAN	5	4	-8.15796	0.0525753	1.05299	0.673825	0.121121	0.644047	0.916782	['Q8NBN3']	TMEM87A
1582	sp|P98175|RBM10_HUMAN	10	3	-79.3905	0.0526999	0.290226	0.477592	0.121329	-0.718602	0.916035	['P98175']	RBM10
14	sp|A6NHR9|SMHD1_HUMAN	20	10	-15.2657	0.052918	0.659224	0.450869	0.121752	0.54806	0.914523	['A6NHR9']	SMCHD1
2650	sp|Q96DB5|RMD1_HUMAN	6	5	-76.5159	0.0531403	0.421781	0.539284	0.122185	-0.354553	0.912983	['Q96DB5']	RMDN1
3164	sp|Q9NVP1|DDX18_HUMAN	15	10	-15.977	0.053258	0.372687	0.398898	0.122377	-0.0980558	0.912302	['Q9NVP1']	DDX18
1128	sp|P42766|RL35_HUMAN	5	4	-14.8194	0.0533116	0.368344	0.152157	0.12242	1.27549	0.912146	['P42766']	RPL35
2291	sp|Q86V15|CASZ1_HUMAN	2	2	-4.84759	0.0534281	0.573137	0.553543	0.122557	0.0501836	0.911661	['Q86V15']	CASZ1
2669	sp|Q96EY7|PTCD3_HUMAN	7	3	-12.1515	0.0534413	0.676153	0.649089	0.122557	0.0589331	0.911661	['Q96EY7']	PTCD3
1381	sp|P59535|T2R40_HUMAN	2	2	#NAME?	0.0534746	0.50988	0.492615	0.122557	0.0496982	0.911661	['P59535']	TAS2R40
2387	sp|Q8N3U4|STAG2_HUMAN	4	2	#NAME?	0.0537596	0.107733	0.253762	0.12307	-1.23602	0.909847	['Q8N3U4']	STAG2
1673	sp|Q07812|BAX_HUMAN	6	3	-8.65307	0.0537676	0.533132	0.928309	0.12307	-0.800113	0.909847	['Q07812']	BAX
325	sp|O75821|EIF3G_HUMAN	4	2	-28.0732	0.0539132	0.58663	0.630075	0.123324	-0.103074	0.908951	['O75821']	EIF3G
109	sp|O15027|SC16A_HUMAN	5	5	#NAME?	0.054101	0.415883	0.326659	0.123674	0.348392	0.90772	['O15027']	SEC16A
1278	sp|P51858|HDGF_HUMAN	6	3	-3.72703	0.0541402	0.729536	0.458777	0.123684	0.669186	0.907685	['P51858']	HDGF
1655	sp|Q05682|CALD1_HUMAN	20	9	-10.2606	0.0543802	1.0718	0.927957	0.124153	0.207903	0.906043	['Q05682']	CALD1
1294	sp|P52788|SPSY_HUMAN	2	2	#NAME?	0.0545104	0.5913	0.375037	0.12437	0.656855	0.905283	['P52788']	SMS
2978	sp|Q9H2P0|ADNP_HUMAN	6	3	#NAME?	0.0546548	0.277172	0.325093	0.12462	-0.230072	0.904412	['Q9H2P0']	ADNP
3461	sp|Q9Y3B3|TMED7_HUMAN	7	4	#NAME?	0.0547247	0.5962	0.953167	0.124699	-0.676932	0.904135	['Q9Y3B3']	TMED7
525	sp|P06280|AGAL_HUMAN	8	3	#NAME?	0.0549329	0.300734	0.218367	0.125094	0.461734	0.902764	['P06280']	GLA
1749	sp|Q13126|MTAP_HUMAN	3	2	#NAME?	0.0550873	0.353099	0.355372	0.125365	-0.00925902	0.901823	['Q13126']	MTAP
2027	sp|Q27J81|INF2_HUMAN	12	4	-8.90396	0.0551797	0.287011	0.0913055	0.125495	1.65233	0.901374	['Q27J81']	INF2
1142	sp|P43686|PRS6B_HUMAN	15	9	-79.1096	0.0553456	0.309239	0.34795	0.125792	-0.170159	0.900348	['P43686']	PSMC4
2673	sp|Q96FQ6|S10AG_HUMAN	3	2	#NAME?	0.0554096	0.445141	0.46251	0.125857	-0.0552214	0.900123	['Q96FQ6']	S100A16
2062	sp|Q587I9|SFT2C_HUMAN	3	2	#NAME?	0.0555514	0.334575	0.647925	0.126069	-0.953496	0.899393	['Q587I9']	SFT2D3
1675	sp|Q07866|KLC1_HUMAN	3	2	#NAME?	0.0555852	0.501808	0.444273	0.126069	0.17569	0.899393	['Q07866']	KLC1
2137	sp|Q6BDS2|URFB1_HUMAN	2	2	#NAME?	0.0556091	0.15142	0.166002	0.126069	-0.132644	0.899393	['Q6BDS2']	UHRF1BP1
2779	sp|Q99567|NUP88_HUMAN	7	4	#NAME?	0.0556517	0.491375	0.500217	0.126085	-0.0257297	0.899337	['Q99567']	NUP88
896	sp|P25788|PSA3_HUMAN	7	4	-34.8825	0.0557321	0.260874	0.103261	0.126187	1.33706	0.898987	['P25788']	PSMA3
1469	sp|P62333|PRS10_HUMAN	10	5	#NAME?	0.0558825	0.515443	0.25214	0.126447	1.03159	0.898093	['P62333']	PSMC6
1958	sp|Q15434|RBMS2_HUMAN	2	2	-0.879105	0.0562625	0.605866	0.530633	0.127226	0.191285	0.895426	['Q15434']	RBMS2
3357	sp|Q9ULC3|RAB23_HUMAN	6	2	#NAME?	0.0564962	0.23348	0.49221	0.127673	-1.07598	0.893902	['Q9ULC3']	RAB23
1583	sp|P98179|RBM3_HUMAN	4	4	-11.0353	0.0567535	0.359606	1.00074	0.128173	-1.47658	0.892204	['P98179']	RBM3
2447	sp|Q8NFH4|NUP37_HUMAN	6	3	#NAME?	0.0574217	0.514278	0.441183	0.129524	0.22117	0.88765	['Q8NFH4']	NUP37
3413	sp|Q9Y266|NUDC_HUMAN	4	4	-3.36348	0.0574246	0.600322	0.443905	0.129524	0.435487	0.88765	['Q9Y266']	NUDC
2373	sp|Q8N111|CEND_HUMAN	5	2	-10.1816	0.057533	0.897003	1.11482	0.129686	-0.313632	0.887106	['Q8N111']	CEND1
1998	sp|Q16555|DPYL2_HUMAN	13	6	-3.62703	0.0575782	0.639842	0.866746	0.129706	-0.437894	0.88704	['Q16555']	DPYSL2
2227	sp|Q7L014|DDX46_HUMAN	21	14	#NAME?	0.0577605	0.420901	0.502751	0.12999	-0.256362	0.886089	['Q7L014']	DDX46
2342	sp|Q8IX12|CCAR1_HUMAN	14	5	0.197654	0.0577776	0.621134	0.744606	0.12999	-0.261573	0.886089	['Q8IX12']	CCAR1
1182	sp|P48431|SOX2_HUMAN	2	2	#NAME?	0.0579796	0.575345	0.651226	0.130362	-0.17873	0.884848	['P48431']	SOX2
1570	sp|P83916|CBX1_HUMAN	7	4	-15.3757	0.0580243	0.889564	0.581883	0.130381	0.612368	0.884787	['P83916']	CBX1
2737	sp|Q96QD9|UIF_HUMAN	2	2	#NAME?	0.0584667	0.539501	0.530828	0.131292	0.0233812	0.881762	['Q96QD9']	FYTTD1
2719	sp|Q96LW7|BINCA_HUMAN	4	3	-12.8786	0.0593366	0.450359	0.73888	0.133161	-0.714266	0.875623	['Q96LW7']	C9orf89
540	sp|P07093|GDN_HUMAN	3	2	-15.3947	0.0601667	0.491552	1.06648	0.134939	-1.11744	0.869863	['P07093']	SERPINE2
453	sp|P00441|SODC_HUMAN	7	6	3.58551	0.0603256	1.13354	0.869732	0.13521	0.382188	0.868991	['P00441']	SOD1
1564	sp|P82932|RT06_HUMAN	5	3	#NAME?	0.0605903	0.52554	0.501705	0.135654	0.0669603	0.867569	['P82932']	MRPS6
51	sp|O00425|IF2B3_HUMAN	16	12	-138.085	0.0605998	0.116878	0.0552016	0.135654	1.08223	0.867569	['O00425']	IGF2BP3
3311	sp|Q9UHQ4|BAP29_HUMAN	6	2	-128.11	0.0609207	0.458265	0.399006	0.136286	0.199772	0.865548	['Q9UHQ4']	BCAP29
1191	sp|P48723|HSP13_HUMAN	7	2	#NAME?	0.0613229	0.938894	0.399175	0.1371	1.23394	0.862963	['P48723']	HSPA13
2213	sp|Q6ZVM7|TM1L2_HUMAN	4	4	#NAME?	0.0614399	0.930166	0.615896	0.137178	0.594802	0.862717	['Q6ZVM7']	TOM1L2
1304	sp|P53007|TXTP_HUMAN	7	3	-6.46471	0.061458	0.508093	0.409118	0.137178	0.312576	0.862717	['P53007']	SLC25A1
2305	sp|Q86XP3|DDX42_HUMAN	14	10	-22.241	0.0614735	0.404057	0.36041	0.137178	0.164917	0.862717	['Q86XP3']	DDX42
1840	sp|Q14141|SEPT6_HUMAN	6	3	-4.58345	0.0615679	1.13429	0.884192	0.137302	0.359361	0.862322	['Q14141']	2006-09-01
2490	sp|Q8TDW5|SYTL5_HUMAN	4	4	#NAME?	0.061609	0.330367	0.294886	0.137308	0.163913	0.862305	['Q8TDW5']	SYTL5
2087	sp|Q5JU85|IQEC2_HUMAN	2	2	#NAME?	0.0620388	0.336566	0.152246	0.138124	1.14449	0.85973	['Q5JU85']	IQSEC2
2195	sp|Q6UXN9|WDR82_HUMAN	6	2	-7.04351	0.0620531	0.488003	0.366513	0.138124	0.413028	0.85973	['Q6UXN9']	WDR82
3198	sp|Q9NY27|PP4R2_HUMAN	3	2	#NAME?	0.0621712	0.708437	0.659891	0.138253	0.102411	0.859324	['Q9NY27']	PPP4R2
649	sp|P11182|ODB2_HUMAN	6	3	#NAME?	0.0621888	0.361682	0.52038	0.138253	-0.524844	0.859324	['P11182']	DBT
2596	sp|Q93050|VPP1_HUMAN	2	2	#NAME?	0.0623039	0.453469	0.509333	0.138423	-0.167606	0.858792	['Q93050']	ATP6V0A1
1416	sp|P61225|RAP2B_HUMAN	4	2	-11.3135	0.0623907	0.337904	0.27756	0.138529	0.283812	0.858459	['P61225']	RAP2B
2958	sp|Q9H0N0|RAB6C_HUMAN	2	2	#NAME?	0.0626739	0.591678	0.379931	0.139071	0.639073	0.856763	['Q9H0N0']	RAB6C
3378	sp|Q9UNE7|CHIP_HUMAN	2	2	#NAME?	0.0628588	0.572838	0.446199	0.139394	0.36044	0.855755	['Q9UNE7']	STUB1
2203	sp|Q6YN16|HSDL2_HUMAN	14	8	-13.8206	0.0629989	0.53294	0.571477	0.13957	-0.100722	0.855207	['Q6YN16']	HSDL2
72	sp|O14524|T194A_HUMAN	3	2	#NAME?	0.0630166	0.589079	0.633213	0.13957	-0.10423	0.855207	['O14524']	TMEM194A
1450	sp|P62191|PRS4_HUMAN	15	8	-16.5732	0.063168	0.281716	0.223348	0.139788	0.33495	0.854529	['P62191']	PSMC1
1931	sp|Q15155|NOMO1_HUMAN	23	14	-12.0592	0.0631936	0.263526	0.384009	0.139788	-0.543196	0.854529	['Q15155']	NOMO1
1103	sp|P40926|MDHM_HUMAN	19	6	-6.02539	0.0635041	0.753236	1.33804	0.140388	-0.828944	0.852671	['P40926']	MDH2
3511	sp|Q9Y5K3|PCY1B_HUMAN	3	3	-62.5335	0.0635556	0.666637	0.436747	0.140414	0.610105	0.852588	['Q9Y5K3']	PCYT1B
1651	sp|Q05209|PTN12_HUMAN	2	2	#NAME?	0.0635966	0.684745	0.551888	0.140418	0.311193	0.852577	['Q05209']	PTPN12
1610	sp|Q01970|PLCB3_HUMAN	8	4	-5.12683	0.0638379	0.54884	0.53535	0.140863	0.0359021	0.851202	['Q01970']	PLCB3
850	sp|P22692|IBP4_HUMAN	3	3	0.362589	0.0639148	0.619271	0.398915	0.140945	0.634491	0.850949	['P22692']	IGFBP4
2966	sp|Q9H1B7|I2BPL_HUMAN	3	2	#NAME?	0.0639844	0.510115	0.512064	0.141011	-0.0055019	0.850746	['Q9H1B7']	IRF2BPL
939	sp|P28799|GRN_HUMAN	9	4	#NAME?	0.0640652	0.385317	0.395767	0.141102	-0.0386066	0.850466	['P28799']	GRN
1911	sp|Q15019|SEPT2_HUMAN	8	5	-0.573443	0.0644252	0.569859	0.443707	0.141807	0.360999	0.848301	['Q15019']	2002-09-01
1422	sp|P61353|RL27_HUMAN	6	3	-0.771239	0.064564	1.13533	0.891555	0.142025	0.34872	0.847636	['P61353']	RPL27
2115	sp|Q5THK1|PR14L_HUMAN	2	2	#NAME?	0.0646219	1.0291	0.510528	0.142046	1.01132	0.847572	['Q5THK1']	PRR14L
1448	sp|P62158|CALM_HUMAN	8	3	9.32698	0.0646534	0.879998	1.13637	0.142046	-0.368855	0.847572	['P62158']	CALM1
2808	sp|Q9BPW8|NIPS1_HUMAN	5	3	-30.252	0.0647288	0.447582	0.464384	0.142124	-0.0531662	0.847333	['Q9BPW8']	NIPSNAP1
2627	sp|Q96AQ6|PBIP1_HUMAN	3	2	-15.37	0.0647737	0.366365	0.537478	0.142135	-0.552924	0.8473	['Q96AQ6']	PBXIP1
900	sp|P26196|DDX6_HUMAN	11	4	-10.3008	0.0649306	1.11084	0.890817	0.142391	0.318456	0.846518	['P26196']	DDX6
519	sp|P05412|JUN_HUMAN	3	3	-8.23309	0.0650066	0.382967	0.542082	0.14247	-0.50129	0.846277	['P05412']	JUN
2018	sp|Q16822|PCKGM_HUMAN	2	2	#NAME?	0.0650721	0.671897	0.506801	0.142526	0.406822	0.846107	['Q16822']	PCK2
3500	sp|Q9Y520|PRC2C_HUMAN	10	2	#NAME?	0.0651679	0.459446	0.426056	0.142648	0.108854	0.845736	['Q9Y520']	PRRC2C
267	sp|O75146|HIP1R_HUMAN	3	2	-14.5409	0.0652708	0.208261	0.33803	0.142759	-0.698758	0.845396	['O75146']	HIP1R
598	sp|P09110|THIK_HUMAN	14	6	-12.5049	0.0652991	0.214438	0.376106	0.142759	-0.810576	0.845396	['P09110']	ACAA1
839	sp|P22059|OSBP1_HUMAN	7	6	#NAME?	0.0653616	0.429517	0.47916	0.142808	-0.157793	0.845248	['P22059']	OSBP
144	sp|O15382|BCAT2_HUMAN	8	4	-6.17802	0.0657096	0.684607	0.704748	0.143409	-0.0418322	0.843424	['O15382']	BCAT2
2713	sp|Q96KG9|NTKL_HUMAN	2	2	1.53865	0.0657173	0.515726	0.347946	0.143409	0.567742	0.843424	['Q96KG9']	SCYL1
3349	sp|Q9UKV3|ACINU_HUMAN	16	6	#NAME?	0.0660573	0.441987	0.419855	0.144062	0.074113	0.841449	['Q9UKV3']	ACIN1
2662	sp|Q96EL2|RT24_HUMAN	2	2	#NAME?	0.0663188	0.501547	0.724788	0.144544	-0.531173	0.84	['Q96EL2']	MRPS24
716	sp|P14649|MYL6B_HUMAN	2	2	#NAME?	0.066451	1.26025	0.793496	0.144743	0.66741	0.839401	['P14649']	MYL6B
755	sp|P17050|NAGAB_HUMAN	3	2	#NAME?	0.0667456	0.248587	0.221741	0.145296	0.164872	0.837746	['P17050']	NAGA
3051	sp|Q9HBI1|PARVB_HUMAN	2	2	#NAME?	0.0668041	0.623648	0.544611	0.145335	0.195505	0.83763	['Q9HBI1']	PARVB
2272	sp|Q7Z7H5|TMED4_HUMAN	4	3	#NAME?	0.0670024	0.488366	0.452518	0.145677	0.109988	0.836609	['Q7Z7H5']	TMED4
250	sp|O60814|H2B1K_HUMAN;sp|P58876|H2B1D_HUMAN;sp|P62807|H2B1C_HUMAN;sp|Q5QNW6|H2B2F_HUMAN;sp|Q93079|H2B1H_HUMAN;sp|Q99877|H2B1N_HUMAN;sp|Q99879|H2B1M_HUMAN;sp|Q99880|H2B1L_HUMAN	7	3	-23.1662	0.0670555	0.798873	1.22861	0.145703	-0.620986	0.836531	['O60814', 'P58876', 'P62807', 'Q5QNW6', 'Q93079', 'Q99877', 'Q99879', 'Q99880']	HIST1H2BK
2210	sp|Q6ZT21|TMPPE_HUMAN	2	2	#NAME?	0.0671859	0.412965	0.47599	0.145898	-0.204913	0.835952	['Q6ZT21']	TMPPE
397	sp|O95295|SNAPN_HUMAN	2	2	#NAME?	0.0675186	0.572854	0.569838	0.146531	0.00761658	0.834072	['O95295']	SNAPIN
2777	sp|Q99536|VAT1_HUMAN	9	4	-3.98706	0.0676752	1.05501	0.456414	0.146781	1.20884	0.83333	['Q99536']	VAT1
3536	sp|Q9Y679|AUP1_HUMAN	3	3	#NAME?	0.0677687	0.452454	0.603985	0.146894	-0.416742	0.832995	['Q9Y679']	AUP1
3509	sp|Q9Y5J7|TIM9_HUMAN	4	3	-7.21025	0.0683207	1.03683	0.501892	0.148	1.04673	0.829737	['Q9Y5J7']	TIMM9
3006	sp|Q9H6E4|CC134_HUMAN	2	2	1.25197	0.0685933	0.542226	0.305668	0.1485	0.826928	0.828272	['Q9H6E4']	CCDC134
2700	sp|Q96IZ0|PAWR_HUMAN	5	2	#NAME?	0.0687583	0.661215	0.365621	0.148756	0.85477	0.827527	['Q96IZ0']	PAWR
1903	sp|Q14980|NUMA1_HUMAN	59	16	-6.79457	0.0687948	0.841948	0.563803	0.148756	0.57854	0.827527	['Q14980']	NUMA1
1168	sp|P46976|GLYG_HUMAN	2	2	-8.87008	0.0691039	0.723726	0.496431	0.149333	0.54385	0.825843	['P46976']	GYG1
656	sp|P11310|ACADM_HUMAN	8	4	-8.33848	0.0695054	0.930413	1.08117	0.150036	-0.216651	0.823804	['P11310']	ACADM
2839	sp|Q9BTC0|DIDO1_HUMAN	9	4	#NAME?	0.0695301	0.222276	0.100928	0.150036	1.13903	0.823804	['Q9BTC0']	DIDO1
1859	sp|Q14254|FLOT2_HUMAN	13	6	#NAME?	0.0695556	0.203395	0.305994	0.150036	-0.589219	0.823804	['Q14254']	FLOT2
2500	sp|Q8WU68|U2AF4_HUMAN	4	3	-1.87726	0.0696878	0.178658	0.380004	0.15023	-1.08881	0.823243	['Q8WU68']	U2AF1L4
3406	sp|Q9Y221|NIP7_HUMAN	5	3	#NAME?	0.0698308	0.414689	0.448234	0.150447	-0.112223	0.822616	['Q9Y221']	NIP7
3025	sp|Q9H8H3|MET7A_HUMAN	6	4	-0.352576	0.0699695	0.397054	0.562356	0.150618	-0.502147	0.822122	['Q9H8H3']	METTL7A
1525	sp|P67809|YBOX1_HUMAN	14	7	-6.17065	0.069995	1.13406	0.884347	0.150618	0.358815	0.822122	['P67809']	YBX1
2810	sp|Q9BPX5|ARP5L_HUMAN	3	2	#NAME?	0.0701499	0.996436	1.00358	0.15086	-0.010303	0.821425	['Q9BPX5']	ARPC5L
1961	sp|Q15459|SF3A1_HUMAN	17	11	-5.01973	0.0702235	1.00052	0.999523	0.150913	0.00143401	0.821273	['Q15459']	SF3A1
1284	sp|P52292|IMA1_HUMAN	10	4	#NAME?	0.0702593	0.979314	0.606504	0.150913	0.691254	0.821273	['P52292']	KPNA2
1920	sp|Q15056|IF4H_HUMAN	3	3	-6.67714	0.0704117	0.587229	0.490643	0.151149	0.259249	0.820594	['Q15056']	EIF4H
3302	sp|Q9UHA4|LTOR3_HUMAN	3	2	-7.03131	0.0705376	1.13235	0.876604	0.151328	0.369324	0.82008	['Q9UHA4']	LAMTOR3
2487	sp|Q8TDD1|DDX54_HUMAN	11	5	-7.51669	0.0706811	0.339935	0.709514	0.151481	-1.06157	0.819641	['Q8TDD1']	DDX54
2807	sp|Q99986|VRK1_HUMAN	4	2	-14.555	0.0706941	0.45685	0.287513	0.151481	0.668093	0.819641	['Q99986']	VRK1
3521	sp|Q9Y5V3|MAGD1_HUMAN	2	2	#NAME?	0.0709312	0.48481	0.478725	0.151869	0.0182241	0.818531	['Q9Y5V3']	MAGED1
460	sp|P00846|ATP6_HUMAN	2	2	-3.2501	0.0709604	0.955785	0.416856	0.151869	1.19714	0.818531	['P00846']	MT-ATP6
3538	sp|Q9Y697|NFS1_HUMAN	4	2	#NAME?	0.0714956	0.317002	0.43496	0.152922	-0.456394	0.815529	['Q9Y697']	NFS1
2413	sp|Q8N9T8|KRI1_HUMAN	3	3	#NAME?	0.0723737	0.431609	0.437505	0.154708	-0.0195752	0.810488	['Q8N9T8']	KRI1
2773	sp|Q99496|RING2_HUMAN	2	2	#NAME?	0.0724425	0.486376	0.707958	0.154762	-0.541591	0.810337	['Q99496']	RNF2
1351	sp|P55327|TPD52_HUMAN	3	2	#NAME?	0.0730117	0.46532	0.258746	0.155884	0.846686	0.807199	['P55327']	TPD52
3070	sp|Q9HD45|TM9S3_HUMAN	9	4	-21.665	0.0731008	0.553379	0.728138	0.155981	-0.395944	0.806929	['Q9HD45']	TM9SF3
1858	sp|Q14249|NUCG_HUMAN	3	2	#NAME?	0.0732025	0.447515	0.699066	0.156077	-0.643494	0.806661	['Q14249']	ENDOG
2698	sp|Q96I25|SPF45_HUMAN	6	3	-3.57578	0.0732338	0.687079	0.543605	0.156077	0.337916	0.806661	['Q96I25']	RBM17
1131	sp|P43007|SATT_HUMAN	5	3	#NAME?	0.073458	0.531938	0.976543	0.156461	-0.876424	0.805593	['P43007']	SLC1A4
1391	sp|P60660|MYL6_HUMAN	8	5	5.41266	0.0737845	1.12005	0.89689	0.157063	0.320564	0.803927	['P60660']	MYL6
677	sp|P12270|TPR_HUMAN	39	23	-16.5433	0.0738354	0.439163	0.50148	0.157077	-0.191437	0.803888	['P12270']	TPR
1812	sp|Q13619|CUL4A_HUMAN	12	6	-2.69956	0.0740182	0.504884	0.517467	0.157372	-0.0355156	0.803074	['Q13619']	CUL4A
154	sp|O43159|RRP8_HUMAN	3	2	-13.1765	0.0742468	0.426784	0.47818	0.157763	-0.164049	0.801994	['O43159']	RRP8
1817	sp|Q13724|MOGS_HUMAN	13	8	#NAME?	0.0744158	0.662825	0.953538	0.158028	-0.524662	0.801266	['Q13724']	MOGS
2828	sp|Q9BRT2|UQCC2_HUMAN	4	4	-7.74438	0.0749236	0.262639	0.50293	0.159011	-0.937277	0.798572	['Q9BRT2']	UQCC2
383	sp|O95167|NDUA3_HUMAN	2	2	#NAME?	0.0750142	0.965597	1.0302	0.159109	-0.093437	0.798306	['O95167']	NDUFA3
726	sp|P15153|RAC2_HUMAN	7	2	-16.0937	0.075109	0.922311	1.08862	0.15917	-0.239177	0.798138	['P15153']	RAC2
3095	sp|Q9NQT4|EXOS5_HUMAN	2	2	#NAME?	0.0751743	0.584722	0.402675	0.15917	0.538136	0.798138	['Q9NQT4']	EXOSC5
2633	sp|Q96BK5|PINX1_HUMAN	2	2	#NAME?	0.0751773	0.451514	0.230478	0.15917	0.970145	0.798138	['Q96BK5']	PINX1
1016	sp|P33897|ABCD1_HUMAN	5	2	#NAME?	0.0753728	0.659065	0.45231	0.159489	0.543109	0.797269	['P33897']	ABCD1
2847	sp|Q9BTX1|NDC1_HUMAN	2	2	-121.573	0.0754692	0.137771	0.46097	0.159598	-1.7424	0.796972	['Q9BTX1']	NDC1
101	sp|O14949|QCR8_HUMAN	5	4	#NAME?	0.0758932	0.463893	0.346496	0.160399	0.420954	0.794797	['O14949']	UQCRQ
3077	sp|Q9NP81|SYSM_HUMAN	6	4	1.74433	0.0760325	0.531366	0.688964	0.160598	-0.374724	0.794259	['Q9NP81']	SARS2
1674	sp|Q07817|B2CL1_HUMAN	2	2	#NAME?	0.0769531	0.250561	0.57369	0.162446	-1.19511	0.78929	['Q07817']	BCL2L1
1490	sp|P62857|RS28_HUMAN	2	2	#NAME?	0.077722	0.94024	1.05377	0.163972	-0.164464	0.78523	['P62857']	RPS28
2023	sp|Q16864|VATF_HUMAN	3	3	#NAME?	0.0779216	0.511439	0.424016	0.164182	0.270443	0.784674	['Q16864']	ATP6V1F
967	sp|P30154|2AAB_HUMAN	5	4	#NAME?	0.0779497	0.406476	0.383732	0.164182	0.0830719	0.784674	['P30154']	PPP2R1B
292	sp|O75431|MTX2_HUMAN	6	4	-6.13546	0.0779599	0.59099	0.651434	0.164182	-0.140485	0.784674	['O75431']	MTX2
222	sp|O60256|KPRB_HUMAN	4	2	#NAME?	0.0781303	1.07079	0.399884	0.164443	1.42102	0.783983	['O60256']	PRPSAP2
1507	sp|P63000|RAC1_HUMAN	6	4	-3.24681	0.0782306	1.0314	0.968781	0.164557	0.0903644	0.783683	['P63000']	RAC1
350	sp|O76024|WFS1_HUMAN	9	3	-11.5427	0.0785037	0.548734	0.416387	0.165034	0.398182	0.782426	['O76024']	WFS1
2864	sp|Q9BV86|NTM1A_HUMAN	2	2	#NAME?	0.0787451	0.656523	0.272003	0.165444	1.27123	0.781349	['Q9BV86']	NTMT1
3185	sp|Q9NX58|LYAR_HUMAN	7	2	-8.49477	0.0789544	0.902915	1.08393	0.165786	-0.263612	0.780453	['Q9NX58']	LYAR
2057	sp|Q53H12|AGK_HUMAN	13	9	#NAME?	0.0791406	0.519283	0.971962	0.165996	-0.904378	0.779902	['Q53H12']	AGK
2544	sp|Q92538|GBF1_HUMAN	6	4	-4.81339	0.0791479	0.622303	0.4694	0.165996	0.406801	0.779902	['Q92538']	GBF1
3408	sp|Q9Y230|RUVB2_HUMAN	15	8	-3.89528	0.0793127	1.01977	0.981358	0.166244	0.0553906	0.779255	['Q9Y230']	RUVBL2
2593	sp|Q92974|ARHG2_HUMAN	3	2	#NAME?	0.0794986	0.241831	0.308224	0.166535	-0.349984	0.778494	['Q92974']	ARHGEF2
399	sp|O95298|NDUC2_HUMAN	4	2	3.57287	0.0795652	0.278994	1.16028	0.166563	-2.05617	0.778421	['O95298']	NDUFC2
2922	sp|Q9BZH6|WDR11_HUMAN	2	2	#NAME?	0.0796057	0.542741	0.416682	0.166563	0.381315	0.778421	['Q9BZH6']	WDR11
1313	sp|P53680|AP2S1_HUMAN	3	2	#NAME?	0.0799105	0.406222	0.649556	0.167013	-0.677188	0.777251	['P53680']	AP2S1
1133	sp|P43121|MUC18_HUMAN	12	5	-12.9664	0.0799144	0.939997	0.688524	0.167013	0.44915	0.777251	['P43121']	MCAM
2093	sp|Q5QJE6|TDIF2_HUMAN	2	2	#NAME?	0.0799664	0.399311	0.670602	0.167023	-0.747946	0.777223	['Q5QJE6']	DNTTIP2
2896	sp|Q9BXY0|MAK16_HUMAN	4	2	#NAME?	0.0800707	0.425484	0.271618	0.167143	0.647529	0.776912	['Q9BXY0']	MAK16
1361	sp|P56192|SYMC_HUMAN	16	11	-10.0466	0.0801267	0.458946	0.362376	0.167162	0.340834	0.776863	['P56192']	MARS
1411	sp|P61160|ARP2_HUMAN	9	2	6.87608	0.0805535	0.137404	0.411323	0.167954	-1.58185	0.774811	['P61160']	ACTR2
277	sp|O75323|NIPS2_HUMAN	6	3	-6.54091	0.0808961	0.129188	0.415641	0.168534	-1.68586	0.773312	['O75323']	GBAS
661	sp|P11498|PYC_HUMAN	6	2	#NAME?	0.0809267	0.461447	0.475254	0.168534	-0.0425345	0.773312	['P11498']	PC
2819	sp|Q9BQG0|MBB1A_HUMAN	31	12	-42.5704	0.0810118	0.501493	0.349835	0.168613	0.519554	0.77311	['Q9BQG0']	MYBBP1A
794	sp|P19012|K1C15_HUMAN	6	3	-6.97579	0.081261	0.219309	0.165511	0.169028	0.406044	0.772042	['P19012']	KRT15
1250	sp|P50990|TCPQ_HUMAN	25	17	-10.5621	0.0813063	0.515227	0.40841	0.169028	0.335191	0.772042	['P50990']	CCT8
375	sp|O94985|CSTN1_HUMAN	2	2	#NAME?	0.0813944	0.392813	0.532449	0.169079	-0.4388	0.77191	['O94985']	CLSTN1
606	sp|P09496|CLCA_HUMAN	4	3	-13.7937	0.0814317	0.228078	0.528275	0.169079	-1.21176	0.77191	['P09496']	CLTA
2237	sp|Q7L5N1|CSN6_HUMAN	2	2	#NAME?	0.0814736	1.10991	0.916768	0.169079	0.275818	0.77191	['Q7L5N1']	COPS6
3	sp|A1L157|TSN11_HUMAN	2	2	#NAME?	0.0816608	1.08217	0.433742	0.169369	1.31902	0.771167	['A1L157']	TSPAN11
3275	sp|Q9UBQ7|GRHPR_HUMAN	9	6	#NAME?	0.0817178	0.341859	0.474689	0.169388	-0.47358	0.771117	['Q9UBQ7']	GRHPR
343	sp|O75955|FLOT1_HUMAN	16	7	#NAME?	0.0818984	0.520089	0.689755	0.169664	-0.407325	0.770411	['O75955']	FLOT1
1941	sp|Q15334|L2GL1_HUMAN	4	2	#NAME?	0.0821494	0.315479	0.333114	0.170085	-0.0784729	0.769335	['Q15334']	LLGL1
1017	sp|P33991|MCM4_HUMAN	17	9	-5.51323	0.082262	0.541013	0.397353	0.170219	0.445242	0.768993	['P33991']	MCM4
1664	sp|Q06787|FMR1_HUMAN	5	2	-7.16462	0.0824226	0.61542	0.408729	0.170452	0.590427	0.768398	['Q06787']	FMR1
3527	sp|Q9Y618|NCOR2_HUMAN	6	3	-6.73148	0.0825846	0.285795	0.275126	0.170688	0.0548899	0.767798	['Q9Y618']	NCOR2
3172	sp|Q9NWH9|SLTM_HUMAN	8	3	-7.22254	0.0826957	0.685418	0.413762	0.17078	0.728182	0.767564	['Q9NWH9']	SLTM
3252	sp|Q9P2I0|CPSF2_HUMAN	3	2	2.31513	0.0827255	0.322461	0.533555	0.17078	-0.726511	0.767564	['Q9P2I0']	CPSF2
874	sp|P24390|ERD21_HUMAN	2	2	#NAME?	0.0827731	0.285596	1.08765	0.17078	-1.92917	0.767564	['P24390']	KDELR1
2687	sp|Q96GR2|ACBG1_HUMAN	2	2	-8.98398	0.0830105	0.439811	0.382238	0.17117	0.202415	0.766572	['Q96GR2']	ACSBG1
2336	sp|Q8IWT6|LRC8A_HUMAN	8	6	-13.1331	0.083377	0.276396	0.48399	0.171751	-0.808241	0.7651	['Q8IWT6']	LRRC8A
73	sp|O14545|TRAD1_HUMAN	2	2	-5.11272	0.0834223	0.168734	0.0740613	0.171751	1.18796	0.7651	['O14545']	TRAFD1
2388	sp|Q8N3V7|SYNPO_HUMAN	4	3	-2.46893	0.0834372	0.446274	0.579229	0.171751	-0.376205	0.7651	['Q8N3V7']	SYNPO
1353	sp|P55769|NH2L1_HUMAN	4	3	-14.7957	0.0836555	0.880532	0.704879	0.172101	0.320999	0.764217	['P55769']	NHP2L1
2535	sp|Q8WZ42|TITIN_HUMAN	10	5	-8.03252	0.0837597	0.15252	0.199267	0.172216	-0.385705	0.763927	['Q8WZ42']	TTN
706	sp|P13995|MTDC_HUMAN	5	4	-17.9689	0.0839189	0.566233	0.507595	0.172443	0.157717	0.763354	['P13995']	MTHFD2
3224	sp|Q9NZV1|CRIM1_HUMAN	2	2	#NAME?	0.0841461	0.350485	0.486666	0.172811	-0.473579	0.76243	['Q9NZV1']	CRIM1
3313	sp|Q9UHR5|S30BP_HUMAN	3	2	-3.39082	0.0844244	0.53225	0.390173	0.173282	0.447988	0.761246	['Q9UHR5']	SAP30BP
3395	sp|Q9UPN4|CP131_HUMAN	3	2	#NAME?	0.0847539	0.342572	0.542151	0.173858	-0.662289	0.759805	['Q9UPN4']	CEP131
3007	sp|Q9H6F5|CCD86_HUMAN	6	4	#NAME?	0.0848284	0.469296	0.508054	0.17391	-0.114482	0.759674	['Q9H6F5']	CCDC86
2724	sp|Q96NW4|ANR27_HUMAN	2	2	#NAME?	0.0850909	0.168279	0.180357	0.174348	-0.1	0.758583	['Q96NW4']	ANKRD27
366	sp|O94901|SUN1_HUMAN	6	3	#NAME?	0.0854508	0.598016	0.410501	0.174985	0.542797	0.757	['O94901']	SUN1
1425	sp|P61513|RL37A_HUMAN	5	3	#NAME?	0.0858137	1.16331	0.848368	0.175627	0.455474	0.755409	['P61513']	RPL37A
2501	sp|Q8WUA2|PPIL4_HUMAN	3	2	-3.51387	0.0860461	0.448998	0.396253	0.176001	0.180289	0.754484	['Q8WUA2']	PPIL4
2921	sp|Q9BZG1|RAB34_HUMAN	4	2	-8.43093	0.086273	0.339018	0.630742	0.176364	-0.895689	0.753591	['Q9BZG1']	RAB34
2171	sp|Q6P4R8|NFRKB_HUMAN	2	2	#NAME?	0.0866605	0.373665	0.461192	0.177054	-0.30362	0.751894	['Q6P4R8']	NFRKB
2341	sp|Q8IX01|SUGP2_HUMAN	11	5	-3.85273	0.0874569	0.481836	0.367471	0.178579	0.390914	0.74817	['Q8IX01']	SUGP2
1030	sp|P35237|SPB6_HUMAN	2	2	#NAME?	0.0877972	0.345027	0.186162	0.179171	0.890147	0.746733	['P35237']	SERPINB6
2196	sp|Q6UXV4|APOOL_HUMAN	4	3	-8.62875	0.0878823	0.539633	0.680292	0.179242	-0.334176	0.746561	['Q6UXV4']	APOOL
1515	sp|P63167|DYL1_HUMAN	4	3	-0.912956	0.0879738	0.809001	0.677676	0.179325	0.255544	0.746358	['P63167']	DYNLL1
628	sp|P10253|LYAG_HUMAN	7	3	-28.7966	0.0880432	0.476132	0.349973	0.179341	0.444117	0.746321	['P10253']	GAA
1143	sp|P43897|EFTS_HUMAN	13	6	-16.283	0.0880821	0.911959	1.09868	0.179341	-0.268725	0.746321	['P43897']	TSFM
2016	sp|Q16795|NDUA9_HUMAN	11	6	-9.35211	0.08883	0.507343	0.587076	0.18076	-0.210584	0.742898	['Q16795']	NDUFA9
1600	sp|Q01196|RUNX1_HUMAN	2	2	#NAME?	0.0889806	0.254907	0.388431	0.180963	-0.607684	0.74241	['Q01196']	RUNX1
1662	sp|Q06481|APLP2_HUMAN	2	2	#NAME?	0.0894981	0.404087	0.557253	0.181911	-0.463666	0.74014	['Q06481']	APLP2
3282	sp|Q9UBW8|CSN7A_HUMAN	2	2	#NAME?	0.0899719	1.06458	0.931537	0.18277	0.192594	0.738095	['Q9UBW8']	COPS7A
321	sp|O75746|CMC1_HUMAN	19	9	-11.3102	0.090048	0.525934	0.57902	0.18282	-0.138732	0.737976	['O75746']	SLC25A12
978	sp|P30520|PURA2_HUMAN	2	2	-12.631	0.0901993	0.584232	0.332934	0.183023	0.811308	0.737495	['P30520']	ADSS
1571	sp|P84074|HPCA_HUMAN	4	3	#NAME?	0.090662	0.440521	0.711052	0.183857	-0.690746	0.73552	['P84074']	HPCA
24	sp|O00139|KIF2A_HUMAN	2	2	#NAME?	0.0907438	1.03131	0.593006	0.183918	0.798366	0.735377	['O00139']	KIF2A
3055	sp|Q9HC16|ABC3G_HUMAN	5	3	#NAME?	0.091077	0.135362	0.0786477	0.184488	0.783345	0.734032	['Q9HC16']	APOBEC3G
2324	sp|Q8IVM0|CCD50_HUMAN	2	2	#NAME?	0.0912015	0.724121	0.499449	0.184635	0.535892	0.733686	['Q8IVM0']	CCDC50
1647	sp|Q04837|SSBP_HUMAN	7	4	6.30687	0.091293	0.636869	0.377365	0.184715	0.755039	0.733498	['Q04837']	SSBP1
2672	sp|Q96FJ2|DYL2_HUMAN	3	2	#NAME?	0.0913992	0.804433	0.755427	0.184825	0.0906805	0.733239	['Q96FJ2']	DYNLL2
3494	sp|Q9Y4P3|TBL2_HUMAN	14	3	-6.5255	0.0914884	0.22385	0.52017	0.1849	-1.21645	0.733063	['Q9Y4P3']	TBL2
2178	sp|Q6PIU2|NCEH1_HUMAN	14	8	-21.7389	0.091705	0.276623	0.470044	0.185233	-0.764874	0.732283	['Q6PIU2']	NCEH1
3140	sp|Q9NU22|MDN1_HUMAN	4	2	#NAME?	0.091777	0.4315	0.268901	0.185273	0.682287	0.732188	['Q9NU22']	MDN1
2031	sp|Q2TAY7|SMU1_HUMAN	10	3	#NAME?	0.0921899	0.556784	0.588127	0.185958	-0.0790105	0.730586	['Q2TAY7']	SMU1
1200	sp|P49257|LMAN1_HUMAN	13	5	-7.86559	0.092253	0.399292	0.585162	0.185958	-0.551393	0.730586	['P49257']	LMAN1
1990	sp|Q16222|UAP1_HUMAN	2	2	-14.1593	0.0922969	0.927686	0.279664	0.185958	1.72994	0.730586	['Q16222']	UAP1
1093	sp|P39687|AN32A_HUMAN	6	4	-6.89158	0.0923254	0.668349	0.419652	0.185958	0.67141	0.730586	['P39687']	ANP32A
3383	sp|Q9UNL2|SSRG_HUMAN	2	2	-9.27581	0.0923873	0.673732	0.662778	0.18597	0.0236499	0.730556	['Q9UNL2']	SSR3
2285	sp|Q86U86|PB1_HUMAN	3	2	-20.3328	0.0924362	0.732817	0.523467	0.18597	0.485354	0.730556	['Q86U86']	PBRM1
127	sp|O15212|PFD6_HUMAN	4	4	#NAME?	0.09272	0.296169	0.295613	0.186436	0.00270932	0.72947	['O15212']	PFDN6
1585	sp|P99999|CYC_HUMAN	8	4	#NAME?	0.0928339	0.947969	0.363572	0.186483	1.3826	0.72936	['P99999']	CYCS
2466	sp|Q8TB22|SPT20_HUMAN	3	3	#NAME?	0.0928485	0.326658	0.299241	0.186483	0.126471	0.72936	['Q8TB22']	SPATA20
2357	sp|Q8IY81|SPB1_HUMAN	14	11	#NAME?	0.0930055	0.417197	0.497397	0.186693	-0.253671	0.728871	['Q8IY81']	FTSJ3
58	sp|O00487|PSDE_HUMAN	3	3	#NAME?	0.0937177	0.567769	0.644514	0.188001	-0.182908	0.72584	['O00487']	PSMD14
1121	sp|P42285|SK2L2_HUMAN	17	6	-11.0061	0.0937626	0.539953	0.546447	0.188001	-0.0172477	0.72584	['P42285']	SKIV2L2
2460	sp|Q8NI27|THOC2_HUMAN	17	8	#NAME?	0.0938659	0.206365	0.316838	0.188102	-0.618549	0.725607	['Q8NI27']	THOC2
3543	sp|Q9Y6E2|BZW2_HUMAN	2	2	#NAME?	0.0940242	0.582548	0.637897	0.188313	-0.130946	0.725119	['Q9Y6E2']	BZW2
1348	sp|P55265|DSRAD_HUMAN	24	14	-1.56654	0.0941525	0.642519	0.397949	0.188464	0.691157	0.724772	['P55265']	ADAR
2780	sp|Q99575|POP1_HUMAN	6	4	-11.7159	0.0942718	0.523816	0.410247	0.188597	0.352567	0.724466	['Q99575']	POP1
2890	sp|Q9BXJ9|NAA15_HUMAN	5	2	-52.9701	0.0943854	0.472895	0.276721	0.188718	0.77309	0.724187	['Q9BXJ9']	NAA15
1503	sp|P62979|RS27A_HUMAN	7	5	-9.01877	0.0945485	0.812483	1.2371	0.188938	-0.606548	0.723682	['P62979']	RPS27A
2999	sp|Q9H4I3|TRABD_HUMAN	2	2	#NAME?	0.0946664	0.471104	0.485624	0.189067	-0.043794	0.723384	['Q9H4I3']	TRABD
278	sp|O75340|PDCD6_HUMAN	3	2	#NAME?	0.0947259	0.410321	0.599229	0.18908	-0.546356	0.723355	['O75340']	PDCD6
199	sp|O43709|WBS22_HUMAN	2	2	#NAME?	0.0958654	0.601203	0.415621	0.191247	0.532584	0.718406	['O43709']	WBSCR22
3086	sp|Q9NQ50|RM40_HUMAN	5	3	-6.08384	0.0961421	0.465046	0.558899	0.191564	-0.265215	0.717686	['Q9NQ50']	MRPL40
566	sp|P07954|FUMH_HUMAN	19	5	-2.88039	0.096154	0.901399	1.12349	0.191564	-0.317744	0.717686	['P07954']	FH
1977	sp|Q15772|SPEG_HUMAN	2	2	#NAME?	0.096186	0.417578	0.47883	0.191564	-0.197466	0.717686	['Q15772']	SPEG
2581	sp|Q92890|UFD1_HUMAN	4	3	0.0685559	0.0962511	0.540039	0.386144	0.191587	0.483925	0.717635	['Q92890']	UFD1L
1575	sp|P84098|RL19_HUMAN	3	2	4.2396	0.0963273	0.510475	1.01724	0.191631	-0.994749	0.717534	['P84098']	RPL19
1826	sp|Q13895|BYST_HUMAN	2	2	#NAME?	0.0964392	0.531078	0.39894	0.191744	0.412752	0.717277	['Q13895']	BYSL
22	sp|O00115|DNS2A_HUMAN	4	3	-3.52382	0.0964921	0.510762	0.553904	0.191744	-0.116986	0.717277	['O00115']	DNASE2
1850	sp|Q14192|FHL2_HUMAN	12	4	-3.29364	0.0968048	1.09186	0.909958	0.192225	0.262913	0.716191	['Q14192']	FHL2
1964	sp|Q15629|TRAM1_HUMAN	4	3	-12.8162	0.0968418	0.630662	0.567393	0.192225	0.152521	0.716191	['Q15629']	TRAM1
469	sp|P01137|TGFB1_HUMAN	3	2	#NAME?	0.096995	0.675229	0.521335	0.192421	0.373168	0.715747	['P01137']	TGFB1
2638	sp|Q96C01|F136A_HUMAN	3	3	-135.601	0.0974685	0.298901	0.633524	0.193171	-1.08373	0.714058	['Q96C01']	FAM136A
1848	sp|Q14165|MLEC_HUMAN	13	7	-4.66479	0.0974816	0.400054	0.429521	0.193171	-0.102534	0.714058	['Q14165']	MLEC
1320	sp|P53999|TCP4_HUMAN	2	2	-7.04575	0.0977488	0.716288	0.484354	0.193492	0.564476	0.713336	['P53999']	SUB1
3102	sp|Q9NR12|PDLI7_HUMAN	14	8	-12.391	0.0977526	0.529551	0.427224	0.193492	0.309779	0.713336	['Q9NR12']	PDLIM7
1060	sp|P35998|PRS7_HUMAN	19	11	-10.8758	0.0979036	0.374182	0.398189	0.193621	-0.0897134	0.713047	['P35998']	PSMC2
388	sp|O95197|RTN3_HUMAN	5	3	-85.529	0.0979265	0.384965	0.301249	0.193621	0.353772	0.713047	['O95197']	RTN3
2295	sp|Q86VM9|ZCH18_HUMAN	8	4	-86.3325	0.0980614	0.587964	0.329819	0.19378	0.834054	0.712691	['Q86VM9']	ZC3H18
1611	sp|Q01995|TAGL_HUMAN	6	3	-50.4582	0.0983317	0.346744	0.383797	0.194206	-0.146473	0.711736	['Q01995']	TAGLN
1018	sp|P33992|MCM5_HUMAN	17	10	#NAME?	0.0987588	0.512087	0.38234	0.194859	0.421532	0.710279	['P33992']	MCM5
760	sp|P17301|ITA2_HUMAN	31	14	0.828956	0.0987717	0.723923	0.591601	0.194859	0.291211	0.710279	['P17301']	ITGA2
2208	sp|Q6ZRS2|SRCAP_HUMAN	2	2	#NAME?	0.0988585	0.436773	0.442476	0.194922	-0.0187152	0.710138	['Q6ZRS2']	SRCAP
444	sp|O96019|ACL6A_HUMAN	8	5	-20.7532	0.0989618	0.428152	0.325339	0.195018	0.39618	0.709926	['O96019']	ACTL6A
3047	sp|Q9HB65|ELL3_HUMAN	2	2	#NAME?	0.0990817	0.344898	0.265461	0.195146	0.377668	0.709641	['Q9HB65']	ELL3
2169	sp|Q6P4E1|CASC4_HUMAN	6	5	#NAME?	0.0992765	0.408424	0.485907	0.195422	-0.250612	0.709028	['Q6P4E1']	CASC4
1757	sp|Q13190|STX5_HUMAN	5	2	#NAME?	0.099683	0.498802	0.668866	0.196113	-0.42325	0.707493	['Q13190']	STX5
3508	sp|Q9Y5J6|T10B_HUMAN	2	2	#NAME?	0.099872	0.492246	0.488436	0.196376	0.0112102	0.706911	['Q9Y5J6']	TIMM10B
1778	sp|Q13409|DC1I2_HUMAN	5	2	#NAME?	0.0999587	0.504758	0.310394	0.196438	0.701491	0.706774	['Q13409']	DYNC1I2
2745	sp|Q96RT1|LAP2_HUMAN	9	5	-96.3053	0.100066	0.485114	0.457785	0.19654	0.0836541	0.706548	['Q96RT1']	ERBB2IP
167	sp|O43299|AP5Z1_HUMAN	2	2	#NAME?	0.100411	0.556611	0.355831	0.197108	0.645479	0.705295	['O43299']	AP5Z1
775	sp|P17980|PRS6A_HUMAN	14	6	#NAME?	0.100498	0.373082	0.551747	0.19717	-0.564514	0.705159	['P17980']	PSMC3
1698	sp|Q0VF96|CGNL1_HUMAN	4	4	-9.22012	0.100556	0.470564	0.514032	0.197175	-0.127466	0.705147	['Q0VF96']	CGNL1
2013	sp|Q16762|THTR_HUMAN	8	5	-9.48474	0.100843	0.971849	1.02745	0.197631	-0.08026	0.704145	['Q16762']	TST
3332	sp|Q9UJV8|PURG_HUMAN	2	2	#NAME?	0.101005	0.298239	0.479003	0.197763	-0.683567	0.703855	['Q9UJV8']	PURG
517	sp|P05387|RLA2_HUMAN	7	5	-13.0644	0.101022	1.01726	0.984404	0.197763	0.0473595	0.703855	['P05387']	RPLP2
2176	sp|Q6PGP7|TTC37_HUMAN	3	2	#NAME?	0.101272	0.507134	0.467173	0.198144	0.11841	0.70302	['Q6PGP7']	TTC37
2201	sp|Q6Y7W6|PERQ2_HUMAN	2	2	#NAME?	0.101547	0.482497	0.550019	0.198573	-0.188961	0.70208	['Q6Y7W6']	GIGYF2
425	sp|O95785|WIZ_HUMAN	2	2	#NAME?	0.101608	0.473275	0.433008	0.198583	0.128284	0.702058	['O95785']	WIZ
3080	sp|Q9NPA8|ENY2_HUMAN	3	2	#NAME?	0.102217	0.34337	0.516664	0.199613	-0.589461	0.699811	['Q9NPA8']	ENY2
1037	sp|P35269|T2FA_HUMAN	4	4	-6.55731	0.102248	0.62752	0.382462	0.199613	0.714345	0.699811	['P35269']	GTF2F1
3269	sp|Q9UBM7|DHCR7_HUMAN	5	3	-1.51077	0.102356	0.639155	0.733897	0.199715	-0.199411	0.699588	['Q9UBM7']	DHCR7
2349	sp|Q8IXQ4|GPAM1_HUMAN	2	2	#NAME?	0.102494	0.549195	0.475524	0.19978	0.207801	0.699447	['Q8IXQ4']	GPALPP1
2606	sp|Q969M3|YIPF5_HUMAN	2	2	#NAME?	0.102502	0.533283	1.01462	0.19978	-0.927972	0.699447	['Q969M3']	YIPF5
1368	sp|P56556|NDUA6_HUMAN	4	2	-55.2073	0.10267	0.519583	0.586035	0.199999	-0.173633	0.698973	['P56556']	NDUFA6
2649	sp|Q96D53|ADCK4_HUMAN	3	2	#NAME?	0.102909	0.444083	0.607449	0.200355	-0.451932	0.6982	['Q96D53']	ADCK4
1070	sp|P36873|PP1G_HUMAN	14	8	-6.8668	0.103041	1.00189	0.243748	0.200498	2.03927	0.69789	['P36873']	PPP1CC
2678	sp|Q96G03|PGM2_HUMAN	4	2	-3.24944	0.103096	0.224719	0.136243	0.200498	0.721934	0.69789	['Q96G03']	PGM2
922	sp|P27708|PYR1_HUMAN	4	2	-8.18913	0.103402	0.28489	0.322326	0.200985	-0.178114	0.696836	['P27708']	CAD
3193	sp|Q9NXL2|ARH38_HUMAN	2	2	#NAME?	0.103614	0.366812	0.368778	0.201161	-0.00771155	0.696455	['Q9NXL2']	ARHGEF38
920	sp|P27695|APEX1_HUMAN	10	3	4.31296	0.103618	0.733141	0.52349	0.201161	0.485929	0.696455	['P27695']	APEX1
2931	sp|Q9C0B7|TNG6_HUMAN	2	2	2.67543	0.103734	0.485639	0.299748	0.201161	0.696133	0.696455	['Q9C0B7']	TANGO6
1171	sp|P47756|CAPZB_HUMAN	12	6	-15.1768	0.103735	0.468834	0.408402	0.201161	0.199087	0.696455	['P47756']	CAPZB
3001	sp|Q9H4L5|OSBL3_HUMAN	11	7	#NAME?	0.103776	0.554307	0.49672	0.201161	0.158253	0.696455	['Q9H4L5']	OSBPL3
2181	sp|Q6PKG0|LARP1_HUMAN	5	3	#NAME?	0.103839	0.472406	0.56396	0.201173	-0.255565	0.69643	['Q6PKG0']	LARP1
748	sp|P16403|H12_HUMAN	8	4	-14.542	0.104025	0.20902	0.0602937	0.201425	1.79356	0.695886	['P16403']	HIST1H1C
800	sp|P19388|RPAB1_HUMAN	4	2	#NAME?	0.10442	1.21709	0.840843	0.202079	0.533529	0.694479	['P19388']	POLR2E
3466	sp|Q9Y3C1|NOP16_HUMAN	3	2	#NAME?	0.104582	0.533863	0.465254	0.202283	0.19845	0.694042	['Q9Y3C1']	NOP16
764	sp|P17568|NDUB7_HUMAN	2	2	#NAME?	0.10465	0.320448	0.621394	0.202305	-0.955418	0.693993	['P17568']	NDUFB7
1928	sp|Q15125|EBP_HUMAN	2	2	-7.36958	0.104985	0.914641	1.08254	0.202842	-0.243141	0.692841	['Q15125']	EBP
1816	sp|Q13641|TPBG_HUMAN	4	4	#NAME?	0.105193	0.447695	0.61392	0.203134	-0.455534	0.692217	['Q13641']	TPBG
3150	sp|Q9NUT2|ABCB8_HUMAN	3	2	-60.809	0.105708	0.754692	0.533369	0.204016	0.500755	0.690335	['Q9NUT2']	ABCB8
149	sp|O15498|YKT6_HUMAN	3	2	0.337145	0.105904	0.299752	0.431579	0.204285	-0.525855	0.689764	['O15498']	YKT6
1195	sp|P48960|CD97_HUMAN	12	5	-17.7887	0.107247	0.304488	0.339641	0.206763	-0.157623	0.684527	['P48960']	CD97
905	sp|P26440|IVD_HUMAN	11	4	-13.7859	0.107374	0.527029	0.46165	0.206897	0.191083	0.684247	['P26440']	IVD
2845	sp|Q9BTV4|TMM43_HUMAN	10	7	-1.66508	0.10762	0.500671	0.434125	0.207118	0.205751	0.683783	['Q9BTV4']	TMEM43
3052	sp|Q9HBL7|PLRKT_HUMAN	2	2	#NAME?	0.107697	0.612742	0.373277	0.207118	0.715032	0.683783	['Q9HBL7']	PLGRKT
1999	sp|Q16563|SYPL1_HUMAN	4	2	-8.22841	0.1077	0.595748	0.251718	0.207118	1.2429	0.683783	['Q16563']	SYPL1
405	sp|O95365|ZBT7A_HUMAN	2	2	-2.60965	0.107775	0.481789	0.356255	0.207118	0.435491	0.683783	['O95365']	ZBTB7A
674	sp|P12235|ADT1_HUMAN	13	4	-4.23689	0.107798	0.894315	1.10748	0.207118	-0.308432	0.683783	['P12235']	SLC25A4
1699	sp|Q0VGL1|LTOR4_HUMAN	3	2	-0.574296	0.107853	0.413401	0.523173	0.207118	-0.339745	0.683783	['Q0VGL1']	LAMTOR4
1930	sp|Q15154|PCM1_HUMAN	3	2	-5.2989	0.107898	0.512088	0.353869	0.207118	0.533176	0.683783	['Q15154']	PCM1
2327	sp|Q8IWA0|WDR75_HUMAN	3	2	#NAME?	0.107955	0.459896	0.406506	0.207118	0.178029	0.683783	['Q8IWA0']	WDR75
3170	sp|Q9NW64|RBM22_HUMAN	2	2	#NAME?	0.10823	0.59985	0.49753	0.207364	0.269818	0.683266	['Q9NW64']	RBM22
1462	sp|P62304|RUXE_HUMAN	4	3	#NAME?	0.108252	0.602691	0.706346	0.207364	-0.228955	0.683266	['P62304']	SNRPE
3294	sp|Q9UGH3|S23A2_HUMAN	2	2	#NAME?	0.108259	0.383822	0.497659	0.207364	-0.37472	0.683266	['Q9UGH3']	SLC23A2
3429	sp|Q9Y2L1|RRP44_HUMAN	8	4	-6.59074	0.10835	0.662831	0.435719	0.207429	0.605242	0.683131	['Q9Y2L1']	DIS3
3149	sp|Q9NUQ9|FA49B_HUMAN	7	3	#NAME?	0.108504	1.04135	0.682518	0.207611	0.60952	0.682751	['Q9NUQ9']	FAM49B
2602	sp|Q969E2|SCAM4_HUMAN	2	2	#NAME?	0.108682	0.525327	0.709965	0.207782	-0.434533	0.682391	['Q969E2']	SCAMP4
2791	sp|Q99666|RGPD5_HUMAN	13	10	-18.1412	0.10871	0.368993	0.522316	0.207782	-0.501329	0.682391	['Q99666']	RGPD5
2200	sp|Q6Y288|B3GLT_HUMAN	4	4	#NAME?	0.108879	0.382484	0.491173	0.207966	-0.36083	0.682008	['Q6Y288']	B3GALTL
2075	sp|Q5H9R7|PP6R3_HUMAN	3	2	-20.1247	0.108923	0.178383	0.313836	0.207966	-0.81503	0.682008	['Q5H9R7']	PPP6R3
2733	sp|Q96Q45|TM237_HUMAN	3	2	#NAME?	0.109566	0.368721	0.535997	0.20908	-0.539697	0.679688	['Q96Q45']	TMEM237
3452	sp|Q9Y375|CIA30_HUMAN	3	2	3.48324	0.109719	0.338578	0.42926	0.20926	-0.342363	0.679314	['Q9Y375']	NDUFAF1
2438	sp|Q8NEV4|MYO3A_HUMAN	2	2	#NAME?	0.110082	0.464902	0.510261	0.209839	-0.13431	0.678113	['Q8NEV4']	MYO3A
1076	sp|P37235|HPCL1_HUMAN	9	4	-12.2142	0.110284	0.344219	0.593266	0.210068	-0.785352	0.67764	['P37235']	HPCAL1
2835	sp|Q9BSY4|CHCH5_HUMAN	3	3	#NAME?	0.11032	0.281301	0.445497	0.210068	-0.663299	0.67764	['Q9BSY4']	CHCHD5
1349	sp|P55268|LAMB2_HUMAN	8	5	#NAME?	0.110573	0.364407	0.383	0.210437	-0.0717936	0.676878	['P55268']	LAMB2
3163	sp|Q9NVM9|ASUN_HUMAN	3	2	-2.22637	0.110677	0.474601	0.522702	0.210523	-0.139275	0.676701	['Q9NVM9']	ASUN
3440	sp|Q9Y2T2|AP3M1_HUMAN	3	3	#NAME?	0.110781	0.436117	0.326901	0.210581	0.415859	0.676581	['Q9Y2T2']	AP3M1
2056	sp|Q53GS9|SNUT2_HUMAN	9	4	#NAME?	0.110826	0.454345	0.468038	0.210581	-0.042839	0.676581	['Q53GS9']	USP39
2021	sp|Q16850|CP51A_HUMAN	7	4	#NAME?	0.111312	0.405452	0.477291	0.211392	-0.235337	0.674911	['Q16850']	CYP51A1
2565	sp|Q92747|ARC1A_HUMAN	7	4	#NAME?	0.111519	0.400818	0.425573	0.211672	-0.0864595	0.674337	['Q92747']	ARPC1A
1711	sp|Q12792|TWF1_HUMAN	7	5	#NAME?	0.111973	0.593296	0.418988	0.21242	0.501843	0.672805	['Q12792']	TWF1
644	sp|P11117|PPAL_HUMAN	5	5	-3.20784	0.112183	0.404549	0.639568	0.212705	-0.660782	0.672222	['P11117']	ACP2
2641	sp|Q96C57|CL043_HUMAN	2	2	#NAME?	0.112262	0.356102	0.195861	0.212741	0.862463	0.672149	['Q96C57']	C12orf43
1038	sp|P35270|SPRE_HUMAN	3	3	#NAME?	0.112338	0.538099	0.504164	0.212772	0.0939789	0.672085	['P35270']	SPR
2492	sp|Q8TE73|DYH5_HUMAN	3	2	#NAME?	0.112952	0.125616	0.297725	0.213796	-1.24497	0.670001	['Q8TE73']	DNAH5
1771	sp|Q13315|ATM_HUMAN	2	2	#NAME?	0.112999	0.209757	0.41125	0.213796	-0.971296	0.670001	['Q13315']	ATM
1618	sp|Q02388|CO7A1_HUMAN	20	8	-14.7902	0.113074	0.368559	0.348074	0.213825	0.0825	0.669941	['Q02388']	COL7A1
1363	sp|P56378|68MP_HUMAN	2	2	#NAME?	0.11328	0.844263	1.17338	0.2141	-0.474902	0.669383	['P56378']	MP68
2332	sp|Q8IWF2|FXRD2_HUMAN	2	2	#NAME?	0.114264	0.351093	0.489288	0.215845	-0.478829	0.665859	['Q8IWF2']	FOXRED2
279	sp|O75347|TBCA_HUMAN	7	3	0.171704	0.115377	0.425513	0.5175	0.217746	-0.282356	0.66205	['O75347']	TBCA
2646	sp|Q96CU9|FXRD1_HUMAN	4	2	#NAME?	0.115392	0.420879	0.479678	0.217746	-0.188662	0.66205	['Q96CU9']	FOXRED1
1762	sp|Q13232|NDK3_HUMAN	2	2	0.345983	0.115839	0.629061	0.457138	0.218472	0.46057	0.660604	['Q13232']	NME3
2846	sp|Q9BTW9|TBCD_HUMAN	2	2	#NAME?	0.116306	0.483781	0.371537	0.219237	0.38085	0.659087	['Q9BTW9']	TBCD
2520	sp|Q8WWI1|LMO7_HUMAN	30	10	-7.69978	0.116478	0.334865	0.580495	0.219445	-0.793705	0.658674	['Q8WWI1']	LMO7
3473	sp|Q9Y3E1|HDGR3_HUMAN	3	2	-6.67243	0.117272	0.591983	0.375667	0.220823	0.656102	0.655955	['Q9Y3E1']	HDGFRP3
1605	sp|Q01650|LAT1_HUMAN	5	3	-156.536	0.117427	0.402507	0.484942	0.221	-0.2688	0.655608	['Q01650']	SLC7A5
2267	sp|Q7Z6E9|RBBP6_HUMAN	3	2	-15.7239	0.117526	0.512419	0.453772	0.221068	0.175355	0.655474	['Q7Z6E9']	RBBP6
3409	sp|Q9Y250|LZTS1_HUMAN	3	2	-13.9695	0.117854	0.43692	0.542609	0.221569	-0.312544	0.654492	['Q9Y250']	LZTS1
2405	sp|Q8N766|EMC1_HUMAN	22	10	#NAME?	0.118229	0.395863	0.375113	0.222156	0.0776763	0.653341	['Q8N766']	EMC1
2257	sp|Q7Z417|NUFP2_HUMAN	5	4	-8.56787	0.118793	0.615278	0.425594	0.223098	0.53176	0.651504	['Q7Z417']	NUFIP2
3284	sp|Q9UDR5|AASS_HUMAN	10	4	-8.06448	0.118904	0.230966	0.399574	0.223123	-0.790782	0.651456	['Q9UDR5']	AASS
3478	sp|Q9Y3P9|RBGP1_HUMAN	3	3	#NAME?	0.118932	0.302099	0.151488	0.223123	0.995814	0.651456	['Q9Y3P9']	RABGAP1
2125	sp|Q5W111|SPRY7_HUMAN	4	2	-2.85209	0.119119	0.344391	0.498075	0.223244	-0.532317	0.65122	['Q5W111']	SPRYD7
2251	sp|Q7Z2W9|RM21_HUMAN	2	2	#NAME?	0.119165	0.683482	0.484012	0.223244	0.497861	0.65122	['Q7Z2W9']	MRPL21
3114	sp|Q9NRG9|AAAS_HUMAN	5	4	-4.43394	0.119185	0.677023	0.514746	0.223244	0.395344	0.65122	['Q9NRG9']	AAAS
2686	sp|Q96GQ7|DDX27_HUMAN	10	4	-11.1503	0.11925	0.28117	0.508372	0.223248	-0.854441	0.651213	['Q96GQ7']	DDX27
2728	sp|Q96PD2|DCBD2_HUMAN	14	5	-14.1009	0.119482	0.40426	0.610557	0.223565	-0.594843	0.650596	['Q96PD2']	DCBLD2
1638	sp|Q03701|CEBPZ_HUMAN	11	4	#NAME?	0.119573	0.40886	0.403481	0.223617	0.0191063	0.650495	['Q03701']	CEBPZ
259	sp|O60888|CUTA_HUMAN	2	2	-8.94496	0.119952	0.579493	0.435358	0.224074	0.41259	0.649608	['O60888']	CUTA
2250	sp|Q7Z2W4|ZCCHV_HUMAN	16	6	-6.12099	0.119972	0.448441	0.309324	0.224074	0.535803	0.649608	['Q7Z2W4']	ZC3HAV1
3418	sp|Q9Y285|SYFA_HUMAN	5	2	#NAME?	0.120006	0.555702	0.369352	0.224074	0.589314	0.649608	['Q9Y285']	FARSA
2857	sp|Q9BUQ8|DDX23_HUMAN	12	5	#NAME?	0.12014	0.442718	0.618061	0.224208	-0.481361	0.64935	['Q9BUQ8']	DDX23
3551	sp|Q9Y6M7|S4A7_HUMAN	9	3	-2.3885	0.120408	0.333587	0.543436	0.224589	-0.704045	0.648611	['Q9Y6M7']	SLC4A7
443	sp|O96013|PAK4_HUMAN	3	2	#NAME?	0.120709	0.423759	0.690744	0.225032	-0.704906	0.647755	['O96013']	PAK4
2642	sp|Q96C86|DCPS_HUMAN	5	3	-7.06824	0.120781	0.574727	0.365635	0.225049	0.652474	0.647724	['Q96C86']	DCPS
2132	sp|Q68E01|INT3_HUMAN	6	3	-16.7833	0.120863	0.418798	0.339281	0.225084	0.303772	0.647656	['Q68E01']	INTS3
1586	sp|Q00059|TFAM_HUMAN	10	7	-10.0675	0.121223	0.323146	0.493547	0.225538	-0.611001	0.64678	['Q00059']	TFAM
1226	sp|P49903|SPS1_HUMAN	2	2	#NAME?	0.121234	0.555232	0.397718	0.225538	0.481342	0.64678	['P49903']	SEPHS1
3239	sp|Q9P0V3|SH3B4_HUMAN	17	7	-17.8287	0.121454	0.308221	0.392257	0.225829	-0.347836	0.64622	['Q9P0V3']	SH3BP4
766	sp|P17655|CAN2_HUMAN	11	6	-4.35224	0.121864	0.31488	0.236605	0.226473	0.412321	0.644983	['P17655']	CAPN2
363	sp|O94875|SRBS2_HUMAN	3	2	-111.981	0.121989	0.552905	0.721879	0.226588	-0.384726	0.644763	['O94875']	SORBS2
1687	sp|Q08426|ECHP_HUMAN	2	2	#NAME?	0.122371	0.433695	0.213156	0.227179	1.02477	0.643633	['Q08426']	EHHADH
710	sp|P14324|FPPS_HUMAN	2	2	#NAME?	0.123057	0.467955	0.403126	0.228332	0.215138	0.641433	['P14324']	FDPS
3361	sp|Q9ULL0|K1210_HUMAN	2	2	#NAME?	0.123197	0.483152	0.49883	0.228473	-0.0460716	0.641165	['Q9ULL0']	KIAA1210
105	sp|O14976|GAK_HUMAN	2	2	#NAME?	0.12337	1.25408	0.382771	0.228675	1.71208	0.640781	['O14976']	GAK
2582	sp|Q92896|GSLG1_HUMAN	24	9	-9.22776	0.123441	0.323915	0.444498	0.228688	-0.45656	0.640757	['Q92896']	GLG1
3214	sp|Q9NZ01|TECR_HUMAN	8	4	3.01946	0.123657	0.934822	1.06382	0.228927	-0.186494	0.640302	['Q9NZ01']	TECR
1584	sp|P98194|AT2C1_HUMAN	11	5	-9.82007	0.123726	0.446671	0.620896	0.228927	-0.47514	0.640302	['P98194']	ATP2C1
3183	sp|Q9NX47|MARH5_HUMAN	7	2	-16.916	0.123764	0.341332	0.38219	0.228927	-0.163116	0.640302	['Q9NX47']	2005-03-01
2273	sp|Q7Z7H8|RM10_HUMAN	2	2	#NAME?	0.124322	0.290229	0.271153	0.229841	0.0980807	0.638573	['Q7Z7H8']	MRPL10
1663	sp|Q06587|RING1_HUMAN	3	3	#NAME?	0.124438	0.445035	0.614778	0.229936	-0.466149	0.638394	['Q06587']	RING1
3048	sp|Q9HB71|CYBP_HUMAN	2	2	-0.371527	0.124797	0.723449	0.488182	0.23048	0.567474	0.637367	['Q9HB71']	CACYBP
2722	sp|Q96N67|DOCK7_HUMAN	5	3	#NAME?	0.125006	0.34684	0.510509	0.230626	-0.557667	0.637092	['Q96N67']	DOCK7
1972	sp|Q15700|DLG2_HUMAN	3	2	#NAME?	0.125006	0.629624	0.617356	0.230626	0.0283864	0.637092	['Q15700']	DLG2
287	sp|O75381|PEX14_HUMAN	9	4	#NAME?	0.125251	0.654957	0.544751	0.230959	0.265803	0.636466	['O75381']	PEX14
1170	sp|P47755|CAZA2_HUMAN	11	4	-4.18079	0.125564	0.944717	1.06557	0.231415	-0.173667	0.635608	['P47755']	CAPZA2
2395	sp|Q8N4V1|MMGT1_HUMAN	2	2	#NAME?	0.125723	0.667303	0.697319	0.231588	-0.0634753	0.635284	['Q8N4V1']	MMGT1
1659	sp|Q06210|GFPT1_HUMAN	5	3	-10.5171	0.125832	0.655808	0.420703	0.231668	0.640471	0.635133	['Q06210']	GFPT1
523	sp|P05787|K2C8_HUMAN	20	9	-7.23651	0.125973	0.972992	1.02685	0.231697	-0.0777329	0.63508	['P05787']	KRT8
1559	sp|P82909|RT36_HUMAN	4	2	0.131124	0.125977	1.04919	0.494055	0.231697	1.08654	0.63508	['P82909']	MRPS36
3268	sp|Q9UBI6|GBG12_HUMAN	4	2	-4.37113	0.126202	0.887155	1.12011	0.23199	-0.336381	0.634531	['Q9UBI6']	GNG12
2949	sp|Q9H082|RB33B_HUMAN	2	2	1.10015	0.126458	0.41434	0.455796	0.232341	-0.137573	0.633875	['Q9H082']	RAB33B
1265	sp|P51571|SSRD_HUMAN	5	2	-4.39469	0.12665	0.836159	1.19595	0.232574	-0.516303	0.63344	['P51571']	SSR4
3231	sp|Q9P0I2|EMC3_HUMAN	3	3	-55.1381	0.126735	1.00267	0.997727	0.232585	0.00712814	0.633418	['Q9P0I2']	EMC3
3228	sp|Q9P016|THYN1_HUMAN	2	2	#NAME?	0.126841	0.525986	0.329371	0.232585	0.675312	0.633418	['Q9P016']	THYN1
3505	sp|Q9Y5F3|PCDB1_HUMAN	2	2	#NAME?	0.126853	0.552517	0.342683	0.232585	0.689142	0.633418	['Q9Y5F3']	PCDHB1
1710	sp|Q12789|TF3C1_HUMAN	5	2	#NAME?	0.127819	0.385396	0.462627	0.234235	-0.26351	0.630347	['Q12789']	GTF3C1
607	sp|P09497|CLCB_HUMAN	4	3	-7.99338	0.128082	0.577837	0.56815	0.234597	0.0243923	0.629677	['P09497']	CLTB
2603	sp|Q969G3|SMCE1_HUMAN	7	3	-15.3563	0.128281	0.623893	0.675754	0.23484	-0.115198	0.629228	['Q969G3']	SMARCE1
1864	sp|Q14320|FA50A_HUMAN	3	2	#NAME?	0.12853	0.332161	0.214089	0.235176	0.633669	0.628607	['Q14320']	FAM50A
99	sp|O14929|HAT1_HUMAN	3	3	-0.459906	0.12894	0.614544	0.44245	0.23574	0.474001	0.627567	['O14929']	HAT1
447	sp|P00352|AL1A1_HUMAN	2	2	#NAME?	0.128986	0.494948	1.03127	0.23574	-1.05908	0.627567	['P00352']	ALDH1A1
2092	sp|Q5M775|CYTSB_HUMAN	8	4	-4.06171	0.129037	0.343097	0.355266	0.23574	-0.0502835	0.627567	['Q5M775']	SPECC1
2337	sp|Q8IWU5|SULF2_HUMAN	4	4	#NAME?	0.129169	0.235663	0.311535	0.235859	-0.402669	0.627348	['Q8IWU5']	SULF2
314	sp|O75616|ERAL1_HUMAN	3	2	-10.006	0.129266	0.594743	0.443645	0.235916	0.42286	0.627242	['O75616']	ERAL1
3366	sp|Q9ULX6|AKP8L_HUMAN	3	2	#NAME?	0.129678	0.579806	0.383895	0.236546	0.59486	0.626084	['Q9ULX6']	AKAP8L
377	sp|O95070|YIF1A_HUMAN	2	2	#NAME?	0.129843	0.263901	0.242903	0.236726	0.119612	0.625754	['O95070']	YIF1A
1580	sp|P98160|PGBM_HUMAN	3	3	#NAME?	0.129941	0.37136	0.56222	0.236783	-0.598316	0.62565	['P98160']	HSPG2
3144	sp|Q9NUL3|STAU2_HUMAN	2	2	#NAME?	0.13022	0.670354	0.654555	0.23717	0.0344088	0.624941	['Q9NUL3']	STAU2
2106	sp|Q5T653|RM02_HUMAN	4	2	-27.3519	0.13077	0.431879	0.416353	0.23805	0.0528178	0.623332	['Q5T653']	MRPL2
1574	sp|P84095|RHOG_HUMAN	9	7	#NAME?	0.131022	0.435643	0.49696	0.238386	-0.189984	0.622719	['P84095']	RHOG
2281	sp|Q86TG7|PEG10_HUMAN	2	2	#NAME?	0.132072	0.524127	0.344675	0.240174	0.604681	0.619474	['Q86TG7']	PEG10
3273	sp|Q9UBQ0|VPS29_HUMAN	2	2	-97.6572	0.132546	1.15477	0.841405	0.240845	0.456734	0.618262	['Q9UBQ0']	VPS29
385	sp|O95169|NDUB8_HUMAN	3	2	#NAME?	0.132577	0.973124	1.03073	0.240845	-0.0829766	0.618262	['O95169']	NDUFB8
2308	sp|Q86Y46|K2C73_HUMAN	3	2	#NAME?	0.132881	0.39803	0.210134	0.241275	0.921565	0.617489	['Q86Y46']	KRT73
945	sp|P29400|CO4A5_HUMAN	2	2	#NAME?	0.132985	1.02946	0.553011	0.24134	0.896508	0.61737	['P29400']	COL4A5
1360	sp|P56182|RRP1_HUMAN	11	3	-31.1505	0.133552	0.372636	0.428348	0.24208	-0.201016	0.616041	['P56182']	RRP1
3350	sp|Q9UKV5|AMFR_HUMAN	5	4	0.303241	0.133584	0.350682	0.453172	0.24208	-0.369898	0.616041	['Q9UKV5']	AMFR
2044	sp|Q4KWH8|PLCH1_HUMAN	2	2	#NAME?	0.133597	0.905714	0.584557	0.24208	0.631712	0.616041	['Q4KWH8']	PLCH1
3195	sp|Q9NXV6|CARF_HUMAN	6	3	#NAME?	0.133856	0.616856	0.521008	0.242427	0.243629	0.615419	['Q9NXV6']	CDKN2AIP
3411	sp|Q9Y263|PLAP_HUMAN	3	2	#NAME?	0.134233	0.52924	0.359622	0.242986	0.55744	0.614419	['Q9Y263']	PLAA
2386	sp|Q8N3K9|CMYA5_HUMAN	3	2	#NAME?	0.134424	0.359366	0.646327	0.243207	-0.84681	0.614023	['Q8N3K9']	CMYA5
1504	sp|P62987|RL40_HUMAN	5	4	-3.75989	0.13462	0.849331	1.18355	0.243439	-0.478719	0.613611	['P62987']	UBA52
2530	sp|Q8WXI7|MUC16_HUMAN	2	2	#NAME?	0.134754	0.37588	0.251064	0.243558	0.582217	0.613398	['Q8WXI7']	MUC16
2014	sp|Q16775|GLO2_HUMAN	2	2	#NAME?	0.134992	0.645471	0.665014	0.243863	-0.0430322	0.612854	['Q16775']	HAGH
2589	sp|Q92930|RAB8B_HUMAN	4	3	-8.87759	0.135213	0.222076	0.322867	0.244106	-0.539882	0.612421	['Q92930']	RAB8B
2759	sp|Q96T58|MINT_HUMAN	4	4	#NAME?	0.135282	0.482847	0.410023	0.244106	0.235859	0.612421	['Q96T58']	SPEN
1719	sp|Q12846|STX4_HUMAN	3	2	#NAME?	0.135332	0.61436	0.536582	0.244106	0.195286	0.612421	['Q12846']	STX4
2701	sp|Q96J01|THOC3_HUMAN	3	2	#NAME?	0.135879	0.452232	0.595647	0.244968	-0.397395	0.61089	['Q96J01']	THOC3
564	sp|P07947|YES_HUMAN	2	2	3.65107	0.136141	0.43972	0.509808	0.245259	-0.21337	0.610374	['P07947']	YES1
2537	sp|Q8WZA0|LZIC_HUMAN	2	2	#NAME?	0.136179	0.418076	0.269504	0.245259	0.63346	0.610374	['Q8WZA0']	LZIC
415	sp|O95563|MPC2_HUMAN	3	2	#NAME?	0.136433	0.934104	0.643452	0.245594	0.53775	0.609782	['O95563']	MPC2
406	sp|O95373|IPO7_HUMAN	11	4	1.356	0.136647	0.575791	0.374552	0.245854	0.620378	0.609323	['O95373']	IPO7
1405	sp|P61026|RAB10_HUMAN	10	7	-11.3007	0.137098	0.253986	0.398456	0.246495	-0.649673	0.608191	['P61026']	RAB10
2440	sp|Q8NF37|PCAT1_HUMAN	4	2	-7.5455	0.137142	0.276791	0.508827	0.246495	-0.878378	0.608191	['Q8NF37']	LPCAT1
48	sp|O00330|ODPX_HUMAN	10	4	#NAME?	0.137378	0.222678	0.353744	0.246794	-0.667748	0.607665	['O00330']	PDHX
1563	sp|P82930|RT34_HUMAN	6	2	-9.02684	0.137518	0.883158	1.1323	0.246922	-0.358512	0.607441	['P82930']	MRPS34
3342	sp|Q9UKF6|CPSF3_HUMAN	4	2	#NAME?	0.1382	0.705585	0.563108	0.24796	0.325408	0.605618	['Q9UKF6']	CPSF3
2172	sp|Q6P587|FAHD1_HUMAN	6	3	#NAME?	0.138286	0.458971	0.670034	0.24796	-0.545833	0.605618	['Q6P587']	FAHD1
2364	sp|Q8IYU8|MICU2_HUMAN	3	2	-14.1145	0.138306	0.420355	0.570614	0.24796	-0.440906	0.605618	['Q8IYU8']	MICU2
1085	sp|P38571|LICH_HUMAN	2	2	#NAME?	0.138727	0.260897	0.0907885	0.24859	1.5229	0.604516	['P38571']	LIPA
3307	sp|Q9UHD9|UBQL2_HUMAN	4	3	#NAME?	0.139158	0.327805	0.276628	0.249175	0.244889	0.603495	['Q9UHD9']	UBQLN2
2866	sp|Q9BVC5|ASHWN_HUMAN	2	2	#NAME?	0.139206	0.368473	0.565757	0.249175	-0.618624	0.603495	['Q9BVC5']	C2orf49
935	sp|P28340|DPOD1_HUMAN	2	2	-21.1116	0.139263	0.68708	0.431749	0.249175	0.670283	0.603495	['P28340']	POLD1
2514	sp|Q8WVQ1|CANT1_HUMAN	2	2	#NAME?	0.139422	0.505917	0.529577	0.249334	-0.0659384	0.603219	['Q8WVQ1']	CANT1
2249	sp|Q7Z2T5|TRM1L_HUMAN	2	2	#NAME?	0.139542	0.479154	0.455239	0.249423	0.0738657	0.603063	['Q7Z2T5']	TRMT1L
392	sp|O95232|LC7L3_HUMAN	9	7	-18.0847	0.139693	0.589624	0.630082	0.249568	-0.0957447	0.602812	['O95232']	LUC7L3
665	sp|P11802|CDK4_HUMAN	2	2	-2.20384	0.140252	0.418261	0.665743	0.250378	-0.670562	0.601404	['P11802']	CDK4
3199	sp|Q9NY61|AATF_HUMAN	2	2	3.03774	0.140288	0.30018	0.380564	0.250378	-0.342314	0.601404	['Q9NY61']	AATF
746	sp|P16278|BGAL_HUMAN	11	5	#NAME?	0.140494	0.591796	0.437211	0.25056	0.436772	0.601089	['P16278']	GLB1
3204	sp|Q9NYC9|DYH9_HUMAN	2	2	#NAME?	0.14053	0.657143	0.571064	0.25056	0.202555	0.601089	['Q9NYC9']	DNAH9
3397	sp|Q9UPP1|PHF8_HUMAN	2	2	-11.8105	0.141156	0.665145	0.324988	0.2514	1.03328	0.599635	['Q9UPP1']	PHF8
2030	sp|Q2PZI1|D19L1_HUMAN	4	2	#NAME?	0.141173	0.747265	0.86066	0.2514	-0.203824	0.599635	['Q2PZI1']	DPY19L1
2144	sp|Q6IAN0|DRS7B_HUMAN	2	2	#NAME?	0.141254	0.589093	0.421547	0.2514	0.482801	0.599635	['Q6IAN0']	DHRS7B
[truncated: 1,559 more rows]
