# Supplementary material for: Multiomic Profiling Identified EGF Receptor Signaling as a Potential Inhibitor of Type I Interferon Response in Models of Oncolytic Therapy by Vesicular Stomatitis Virus
Source: Int J Mol Sci. 2022 May 8;23(9):5244. doi: 10.3390/ijms23095244 (PMC9102229; doi:10.3390/ijms23095244)
Supplement: Supplementary file 1 [file ijms-23-05244-s001.zip › Table S4.xlsx]

## Sheet: Sheet1
Table S4. Label-free quantitative analysis of differential production of proteins in the proteome of the HOS cell line after type I interferon treatment, performed by Diffacto software
	Protein	N.Pept	Q.Pept	S/N	P(PECA)	INTERFERON	CONTROL	Benjamini Hochberg FDR	log2(fold_change)	#NAME?	protein_id	gene
902	sp|P20591|MX1_HUMAN	28	8	8.44215	1.00195e-95	1	0.0303628	4.17815e-92	5.04155	91.379	['P20591']	MX1
2020	sp|Q14204|DYHC1_HUMAN	150	48	7.19385	6.20193e-63	0.851227	1.16611	1.2931e-59	-0.454084	58.8884	['Q14204']	DYNC1H1
903	sp|P20592|MX2_HUMAN	24	8	3.54533	8.03418e-61	1	0.0710875	1.11675e-57	3.81426	56.952	['P20592']	MX2
954	sp|P23497|SP100_HUMAN	18	6	7.5322	5.08821e-59	1	0.0235812	5.30446e-56	5.40622	55.2754	['P23497']	SP100
1132	sp|P35579|MYH9_HUMAN	120	35	6.72946	2.95474e-55	0.736684	1.34598	2.46425e-52	-0.869537	51.6083	['P35579']	MYH9
1305	sp|P49327|FAS_HUMAN	79	43	7.67788	2.15807e-50	0.807141	1.2167	1.49986e-47	-0.592084	46.8239	['P49327']	FASN
338	sp|O75369|FLNB_HUMAN	105	43	7.27184	5.69608e-50	0.807855	1.21949	3.39323e-47	-0.594108	46.4694	['O75369']	FLNB
551	sp|P02751|FINC_HUMAN	56	26	7.46172	2.63866e-49	1.49157	0.397047	1.3754e-46	1.90945	45.8616	['P02751']	FN1
1032	sp|P29590|PML_HUMAN	21	14	4.94478	4.01177e-49	1.65182	0.265649	1.85879e-46	2.63646	45.7308	['P29590']	PML
726	sp|P11021|GRP78_HUMAN	37	19	6.64287	2.2466e-48	1.22934	0.807727	9.36831e-46	0.605941	45.0283	['P11021']	HSPA5
2804	sp|Q8TCS8|PNPT1_HUMAN	26	17	16.1941	2.65498e-48	1.36231	0.70593	1.00648e-45	0.948458	44.9972	['Q8TCS8']	PNPT1
698	sp|P09914|IFIT1_HUMAN	12	5	-2.21312	1.01015e-45	1	0.0467279	3.51026e-43	4.41957	42.4547	['P09914']	IFIT1
1133	sp|P35580|MYH10_HUMAN	111	42	5.99925	1.28622e-36	0.809794	1.22772	4.1258e-34	-0.600357	33.3845	['P35580']	MYH10
3779	sp|Q9P2E9|RRBP1_HUMAN	49	16	12.168	5.78842e-33	1.21037	0.817237	1.72412e-30	0.566619	29.7634	['Q9P2E9']	RRBP1
1241	sp|P46013|KI67_HUMAN	95	26	7.80622	1.16598e-32	1.17533	0.83484	3.24142e-30	0.493496	29.4893	['P46013']	MKI67
4071	sp|Q9Y3Z3|SAMH1_HUMAN	17	8	5.62551	5.50881e-32	1.49011	0.282278	1.43573e-29	2.40023	28.8429	['Q9Y3Z3']	SAMHD1
3215	sp|Q99715|COCA1_HUMAN	72	23	15.4321	9.4133e-32	0.818733	1.21915	2.30903e-29	-0.574409	28.6366	['Q99715']	COL12A1
544	sp|P02452|CO1A1_HUMAN	53	29	6.37911	2.0656e-30	0.819085	1.21058	4.78531e-28	-0.563615	27.3201	['P02452']	COL1A1
920	sp|P21333|FLNA_HUMAN	126	42	3.15752	4.05428e-30	0.854794	1.16294	8.56365e-28	-0.444132	27.0673	['P21333']	FLNA
1266	sp|P46940|IQGA1_HUMAN	62	28	4.85321	4.10727e-30	0.854919	1.1605	8.56365e-28	-0.440889	27.0673	['P46940']	IQGAP1
870	sp|P18206|VINC_HUMAN	55	28	9.72933	2.09061e-29	0.825769	1.20397	4.15135e-27	-0.543994	26.3818	['P18206']	VCL
1462	sp|P55060|XPO2_HUMAN	30	12	5.81203	3.60838e-28	0.805866	1.23407	6.83953e-26	-0.614818	25.165	['P55060']	CSE1L
668	sp|P08670|VIME_HUMAN	38	16	17.7939	1.3159e-27	1.18988	0.839697	2.38578e-25	0.502871	24.6224	['P08670']	VIM
1815	sp|Q07065|CKAP4_HUMAN	30	13	15.2612	3.29521e-27	1.25233	0.794844	5.72542e-25	0.655866	24.2422	['Q07065']	CKAP4
4087	sp|Q9Y4L1|HYOU1_HUMAN	49	23	3.94299	4.66712e-27	1.27957	0.772995	7.78476e-25	0.727133	24.1088	['Q9Y4L1']	HYOU1
2323	sp|Q5K651|SAMD9_HUMAN	5	3	7.73545	1.03927e-26	1	0.251375	1.66683e-24	1.99209	23.7781	['Q5K651']	SAMD9
585	sp|P05161|ISG15_HUMAN	5	3	7.0387	4.55949e-26	3.0985	0.0706617	7.04188e-24	5.4545	23.1523	['P05161']	ISG15
786	sp|P13797|PLST_HUMAN	27	14	10.4093	2.66947e-25	0.821091	1.18927	3.97561e-23	-0.534456	22.4006	['P13797']	PLS3
943	sp|P23142|FBLN1_HUMAN	4	3	#NAME?	6.91557e-25	1.02781	0.374724	9.94411e-23	1.45567	22.0024	['P23142']	FBLN1
743	sp|P11388|TOP2A_HUMAN	57	18	6.01735	7.9079e-25	1.19382	0.831678	1.0992e-22	0.521488	21.9589	['P11388']	TOP2A
1210	sp|P42224|STAT1_HUMAN	26	9	9.60803	1.0151e-24	1.89223	0.247449	1.36547e-22	2.93489	21.8647	['P42224']	STAT1
625	sp|P07237|PDIA1_HUMAN	35	13	6.31715	1.45308e-24	1.25752	0.790014	1.89355e-22	0.670633	21.7227	['P07237']	P4HB
1681	sp|P78527|PRKDC_HUMAN	134	41	1.25867	5.74849e-24	0.377052	1.1562	7.26401e-22	-1.61655	21.1388	['P78527']	PRKDC
645	sp|P07951|TPM2_HUMAN	18	6	6.75181	2.76342e-23	0.779157	1.27582	3.38926e-21	-0.711441	20.4699	['P07951']	TPM2
1801	sp|Q05682|CALD1_HUMAN	27	9	10.0469	4.29958e-23	0.826364	1.21263	5.12265e-21	-0.553287	20.2905	['Q05682']	CALD1
1261	sp|P46821|MAP1B_HUMAN	63	22	4.51528	5.81032e-23	0.819373	1.21191	6.73028e-21	-0.56469	20.172	['P46821']	MAP1B
1917	sp|Q13287|NMI_HUMAN	2	2	2.90641	6.04771e-23	1	0.425135	6.81594e-21	1.23401	20.1665	['Q13287']	NMI
801	sp|P14625|ENPL_HUMAN	46	14	16.069	1.40127e-22	1.25098	0.79899	1.53771e-20	0.64681	19.8131	['P14625']	HSP90B1
687	sp|P09493|TPM1_HUMAN	21	6	4.30871	2.43028e-22	0.730524	1.31297	2.59853e-20	-0.845831	19.5853	['P09493']	TPM1
779	sp|P13639|EF2_HUMAN	46	19	3.53453	3.84778e-22	0.767561	1.29114	4.01131e-20	-0.750287	19.3967	['P13639']	EEF2
4097	sp|Q9Y570|PPME1_HUMAN	10	7	4.19757	6.93528e-22	0.668312	1.43598	7.05368e-20	-1.10344	19.1516	['Q9Y570']	PPME1
2228	sp|Q29963|1C06_HUMAN	11	9	4.53881	1.29743e-21	1.58279	0.108025	1.28817e-19	3.87302	18.89	['Q29963']	HLA-C
224	sp|O43707|ACTN4_HUMAN	58	22	2.08339	1.57873e-21	0.841962	1.17326	1.531e-19	-0.478701	18.815	['O43707']	ACTN4
1663	sp|P69905|HBA_HUMAN	5	3	-5.91779	2.21873e-21	2.13706	0.180558	2.10275e-19	3.56509	18.6772	['P69905']	HBA1
1812	sp|Q07000|1C15_HUMAN	10	8	3.84775	2.79355e-21	1.5485	0.108775	2.58869e-19	3.83146	18.5869	['Q07000']	HLA-C
2028	sp|Q14258|TRI25_HUMAN	14	8	3.92854	1.38447e-20	1.35075	0.337968	1.25505e-18	1.9988	17.9013	['Q14258']	TRIM25
783	sp|P13667|PDIA4_HUMAN	35	17	4.3828	3.66001e-20	1.1443	0.873888	3.24729e-18	0.388942	17.4885	['P13667']	PDIA4
1363	sp|P50990|TCPQ_HUMAN	32	15	5.7542	4.10512e-20	0.804002	1.24333	3.56633e-18	-0.628939	17.4478	['P50990']	CCT8
541	sp|P01892|1A02_HUMAN	12	5	15.3837	5.14389e-20	1.70741	0.578989	4.37755e-18	1.5602	17.3588	['P01892']	HLA-A
996	sp|P26641|EF1G_HUMAN	21	11	4.06481	6.02126e-20	0.720431	1.35642	5.02173e-18	-0.912874	17.2991	['P26641']	EEF1G
115	sp|O14879|IFIT3_HUMAN	13	6	0.286633	8.79628e-20	0.484907	0.0719292	7.19225e-18	2.75306	17.1431	['O14879']	IFIT3
763	sp|P12270|TPR_HUMAN	87	30	-0.908212	1.88214e-19	1.13587	0.337981	1.50933e-17	1.74879	16.8212	['P12270']	TPR
2010	sp|Q14152|EIF3A_HUMAN	50	16	0.134362	3.05285e-19	0.829155	1.19182	2.40196e-17	-0.523452	16.6194	['Q14152']	EIF3A
546	sp|P02461|CO3A1_HUMAN	27	8	11.899	3.19893e-19	0.741313	1.29331	2.47028e-17	-0.802914	16.6073	['P02461']	COL3A1
1022	sp|P28838|AMPL_HUMAN	15	7	-4.55494	4.31757e-19	1.16766	0.241901	3.2735e-17	2.27113	16.485	['P28838']	LAP3
1172	sp|P38646|GRP75_HUMAN	39	15	8.24881	7.50237e-19	1.15444	0.860951	5.58658e-17	0.423188	16.2529	['P38646']	HSPA9
839	sp|P16615|AT2A2_HUMAN	35	11	2.83774	3.01848e-18	1.23802	0.794355	2.19216e-16	0.640179	15.6591	['P16615']	ATP2A2
2227	sp|Q29960|1C16_HUMAN	9	7	0.837102	3.04905e-18	1.44632	0.0761362	2.19216e-16	4.24766	15.6591	['Q29960']	HLA-C
3249	sp|Q9BQE5|APOL2_HUMAN	6	3	-6.13097	3.94301e-18	1.26068	0.221905	2.78684e-16	2.50619	15.5549	['Q9BQE5']	APOL2
630	sp|P07437|TBB5_HUMAN	20	11	4.46268	4.95949e-18	0.839625	1.19101	3.44685e-16	-0.504365	15.4626	['P07437']	TUBB
3227	sp|Q99832|TCPH_HUMAN	24	9	11.4214	7.09883e-18	0.829331	1.20994	4.85281e-16	-0.544916	15.314	['Q99832']	CCT7
1783	sp|Q03519|TAP2_HUMAN	4	3	-2.5272	8.48213e-18	1	0.338954	5.70492e-16	1.56084	15.2438	['Q03519']	TAP2
762	sp|P12268|IMDH2_HUMAN	18	7	4.43258	1.19295e-17	0.794281	1.26377	7.89616e-16	-0.670007	15.1026	['P12268']	IMPDH2
1471	sp|P55265|DSRAD_HUMAN	23	10	2.07139	5.66423e-17	1.16009	0.282181	3.6906e-15	2.03954	14.4329	['P55265']	ADAR
1658	sp|P68371|TBB4B_HUMAN	21	13	5.83052	2.00778e-16	0.845806	1.18381	1.28807e-14	-0.48504	13.8901	['P68371']	TUBB4B
1204	sp|P41252|SYIC_HUMAN	41	12	0.765914	2.55437e-16	0.857464	1.1826	1.6139e-14	-0.463812	13.7921	['P41252']	IARS
1184	sp|P40227|TCPZ_HUMAN	23	13	6.58636	2.84538e-16	0.858651	1.15635	1.77093e-14	-0.429439	13.7518	['P40227']	CCT6A
1057	sp|P30501|1C02_HUMAN	10	8	5.48284	7.65856e-16	1.62778	0.130957	4.6965e-14	3.63575	13.3282	['P30501']	HLA-C
626	sp|P07305|H10_HUMAN	4	4	10.6545	8.35281e-16	1.20047	0.833009	5.048e-14	0.527191	13.2969	['P07305']	H1F0
1364	sp|P50991|TCPD_HUMAN	26	10	-0.203191	1.05319e-15	0.843108	1.1953	6.27398e-14	-0.503577	13.2025	['P50991']	CCT4
2584	sp|Q86VP6|CAND1_HUMAN	28	11	1.11253	1.35567e-15	0.814286	1.21607	7.96218e-14	-0.578619	13.099	['Q86VP6']	CAND1
656	sp|P08238|HS90B_HUMAN	41	14	-0.0971541	1.57967e-15	0.804724	1.22412	9.14895e-14	-0.60518	13.0386	['P08238']	HSP90AB1
2507	sp|Q7L014|DDX46_HUMAN	26	12	1.13253	1.86426e-15	0.856951	1.14949	1.06493e-13	-0.423702	12.9727	['Q7L014']	DDX46
638	sp|P07900|HS90A_HUMAN	39	12	1.55751	2.28874e-15	0.295055	1.19156	1.28974e-13	-2.0138	12.8895	['P07900']	HSP90AA1
1048	sp|P30101|PDIA3_HUMAN	32	12	7.41593	2.34545e-15	1.16605	0.857497	1.30407e-13	0.443421	12.8847	['P30101']	PDIA3
1781	sp|Q03252|LMNB2_HUMAN	32	16	4.56545	2.5305e-15	1.11203	0.895382	1.38845e-13	0.312624	12.8575	['Q03252']	LMNB2
950	sp|P23381|SYWC_HUMAN	17	9	-2.71489	2.67034e-15	1.30966	0.220087	1.44615e-13	2.57305	12.8398	['P23381']	WARS
2112	sp|Q15149|PLEC_HUMAN	165	66	-9.09449	3.33624e-15	1.01888	0.435742	1.78361e-13	1.22543	12.7487	['Q15149']	PLEC
891	sp|P19525|E2AK2_HUMAN	12	5	0.519581	4.53676e-15	1.33865	0.53696	2.39472e-13	1.31789	12.6207	['P19525']	EIF2AK2
577	sp|P05023|AT1A1_HUMAN	41	20	6.22266	5.6955e-15	1.15471	0.870527	2.96878e-13	0.407573	12.5274	['P05023']	ATP1A1
869	sp|P18124|RL7_HUMAN	17	6	3.71183	8.5266e-15	0.739559	1.32455	4.38962e-13	-0.840764	12.3576	['P18124']	RPL7
1351	sp|P50454|SERPH_HUMAN	19	7	1.41921	8.95657e-15	1.21008	0.826425	4.55474e-13	0.550146	12.3415	['P50454']	SERPINH1
1735	sp|Q01082|SPTB2_HUMAN	97	41	-9.4865	1.6196e-14	1.04868	0.475365	8.137e-13	1.14147	12.0895	['Q01082']	SPTBN1
1089	sp|P31948|STIP1_HUMAN	33	14	1.62035	1.68388e-14	0.852801	1.15465	8.35926e-13	-0.437178	12.0778	['P31948']	STIP1
995	sp|P26640|SYVC_HUMAN	27	11	-2.47404	1.78181e-14	0.836088	1.19568	8.74134e-13	-0.516104	12.0584	['P26640']	VARS
1935	sp|Q13428|TCOF_HUMAN	37	16	8.51843	2.56017e-14	1.15363	0.869643	1.24139e-12	0.407689	11.9061	['Q13428']	TCOF1
1598	sp|P62701|RS4X_HUMAN	17	7	-2.32135	4.35852e-14	0.851709	1.17906	2.08908e-12	-0.469208	11.68	['P62701']	RPS4X
2666	sp|Q8IZL8|PELP1_HUMAN	19	9	-1.54693	7.55745e-14	1.08798	0.450124	3.5812e-12	1.27325	11.446	['Q8IZL8']	PELP1
1542	sp|P61313|RL15_HUMAN	9	8	6.68339	7.84017e-14	0.795404	1.2451	3.67343e-12	-0.646506	11.4349	['P61313']	RPL15
1476	sp|P55786|PSA_HUMAN	28	13	2.93537	9.12586e-14	0.483516	1.19699	4.22831e-12	-1.30778	11.3738	['P55786']	NPEPPS
611	sp|P06737|PYGL_HUMAN	22	10	2.06964	1.02399e-13	0.835677	1.19934	4.69237e-12	-0.521221	11.3286	['P06737']	PYGL
1466	sp|P55145|MANF_HUMAN	11	5	0.62393	1.06559e-13	1.27618	0.778771	4.8299e-12	0.712564	11.3161	['P55145']	MANF
1288	sp|P48643|TCPE_HUMAN	35	10	-2.67795	1.26064e-13	0.765106	1.28394	5.65256e-12	-0.746845	11.2478	['P48643']	CCT5
2861	sp|Q8WWI1|LMO7_HUMAN	38	20	-15.2796	1.68445e-13	1.09483	0.391505	7.4725e-12	1.4836	11.1265	['Q8WWI1']	LMO7
384	sp|O75821|EIF3G_HUMAN	9	5	-11.2393	1.88396e-13	0.281596	1.06158	8.26961e-12	-1.91452	11.0825	['O75821']	EIF3G
1530	sp|P61158|ARP3_HUMAN	18	7	-0.81686	2.02108e-13	0.827932	1.18479	8.77906e-12	-0.517048	11.0566	['P61158']	ACTR3
2142	sp|Q15424|SAFB1_HUMAN	31	9	11.205	2.09275e-13	1.23754	0.805891	8.9431e-12	0.61882	11.0485	['Q15424']	SAFB
1039	sp|P30041|PRDX6_HUMAN	15	9	3.36782	2.10174e-13	0.359979	1.20129	8.9431e-12	-1.7386	11.0485	['P30041']	PRDX6
568	sp|P04406|G3P_HUMAN	17	9	1.91404	2.22517e-13	0.714187	1.39045	9.37268e-12	-0.96118	11.0281	['P04406']	GAPDH
1008	sp|P27797|CALR_HUMAN	22	7	-0.837766	3.32226e-13	1.26113	0.792329	1.38538e-11	0.670551	10.8584	['P27797']	CALR
11	sp|A6NCE7|MP3B2_HUMAN;sp|Q9GZQ8|MLP3B_HUMAN	3	3	-64.1089	3.41838e-13	0.353688	1.23003	1.41135e-11	-1.79814	10.8504	['A6NCE7', 'Q9GZQ8']	MAP1LC3B2
3394	sp|Q9GZR7|DDX24_HUMAN	28	9	0.262537	3.95832e-13	1.18995	0.429495	1.61825e-11	1.47019	10.791	['Q9GZR7']	DDX24
672	sp|P08758|ANXA5_HUMAN	17	10	0.719851	4.19827e-13	0.782946	1.2668	1.69969e-11	-0.694202	10.7696	['P08758']	ANXA5
1010	sp|P27824|CALX_HUMAN	31	15	17.2977	4.71792e-13	1.23022	0.812701	1.8917e-11	0.598119	10.7231	['P27824']	CANX
654	sp|P08195|4F2_HUMAN	22	8	17.677	6.09183e-13	1.17809	0.846321	2.41933e-11	0.477172	10.6163	['P08195']	SLC3A2
2107	sp|Q15084|PDIA6_HUMAN	17	7	1.37106	6.54477e-13	1.18376	0.847522	2.57469e-11	0.482053	10.5893	['Q15084']	PDIA6
3781	sp|Q9P2J5|SYLC_HUMAN	32	9	-2.20057	6.80068e-13	0.849906	1.20167	2.65036e-11	-0.499669	10.5767	['Q9P2J5']	LARS
2114	sp|Q15155|NOMO1_HUMAN	23	15	2.3932	8.01152e-13	1.18119	0.391511	3.09334e-11	1.59312	10.5096	['Q15155']	NOMO1
561	sp|P04083|ANXA1_HUMAN	20	8	-0.05677	8.21955e-13	0.854035	1.17	3.14454e-11	-0.454137	10.5024	['P04083']	ANXA1
1792	sp|Q04760|LGUL_HUMAN	7	3	-5.52707	8.73165e-13	0.786628	1.26065	3.31009e-11	-0.680419	10.4802	['Q04760']	GLO1
1662	sp|P69849|NOMO3_HUMAN;sp|Q5JPE7|NOMO2_HUMAN	23	14	4.18523	9.79899e-13	1.17109	0.397737	3.68124e-11	1.55797	10.434	['P69849', 'Q5JPE7']	NOMO3
1677	sp|P78371|TCPB_HUMAN	28	13	-0.866962	1.08792e-12	0.293628	1.1863	4.05055e-11	-2.01441	10.3925	['P78371']	CCT2
1033	sp|P29692|EF1D_HUMAN	15	5	-3.60955	1.11299e-12	0.859071	1.16405	4.10723e-11	-0.438301	10.3865	['P29692']	EEF1D
1258	sp|P46781|RS9_HUMAN	14	6	-0.666326	1.27655e-12	0.70933	1.46538	4.6695e-11	-1.04675	10.3307	['P46781']	RPS9
1327	sp|P49748|ACADV_HUMAN	28	13	0.613267	1.50655e-12	1.17288	0.841887	5.46288e-11	0.47836	10.2626	['P49748']	ACADVL
1175	sp|P39023|RL3_HUMAN	18	7	6.15488	1.54109e-12	0.838122	1.20975	5.53996e-11	-0.529474	10.2565	['P39023']	RPL3
885	sp|P19338|NUCL_HUMAN	31	8	3.69731	1.58988e-12	0.716334	1.40233	5.6665e-11	-0.969121	10.2467	['P19338']	NCL
522	sp|P00338|LDHA_HUMAN	16	8	7.7199	1.6436e-12	0.802113	1.23873	5.8083e-11	-0.626982	10.236	['P00338']	LDHA
747	sp|P11586|C1TC_HUMAN	38	11	0.311199	1.95355e-12	0.819996	1.18664	6.84563e-11	-0.533188	10.1646	['P11586']	MTHFD1
1228	sp|P43243|MATR3_HUMAN	38	15	3.06516	2.04802e-12	1.13802	0.876052	7.11687e-11	0.377435	10.1477	['P43243']	MATR3
720	sp|P10606|COX5B_HUMAN	6	3	11.2537	2.27776e-12	1.12848	0.886146	7.84979e-11	0.348766	10.1051	['P10606']	COX5B
2319	sp|Q5JTV8|TOIP1_HUMAN	16	9	3.97636	2.58699e-12	1.12324	0.883746	8.84241e-11	0.345958	10.0534	['Q5JTV8']	TOR1AIP1
2029	sp|Q14315|FLNC_HUMAN	113	44	-3.02093	2.82297e-12	0.971419	1.0317	9.57055e-11	-0.0868645	10.0191	['Q14315']	FLNC
3508	sp|Q9H930|SP14L_HUMAN	3	2	-4.11452	2.92499e-12	1.36966	0.209772	9.83645e-11	2.70692	10.0072	['Q9H930']	SP140L
505	sp|O95816|BAG2_HUMAN	14	5	#NAME?	2.99714e-12	0.302162	1.21559	9.99847e-11	-2.00826	10.0001	['O95816']	BAG2
984	sp|P26006|ITA3_HUMAN	15	7	7.83779	3.64012e-12	1.24227	0.404714	1.20471e-10	1.618	9.91912	['P26006']	ITGA3
3308	sp|Q9BVA1|TBB2B_HUMAN	20	10	3.58885	3.95588e-12	0.848753	1.17592	1.2989e-10	-0.470373	9.88642	['Q9BVA1']	TUBB2B
768	sp|P12814|ACTN1_HUMAN	56	22	1.09607	4.04781e-12	0.850066	1.16684	1.3187e-10	-0.456965	9.87985	['P12814']	ACTN1
245	sp|O43852|CALU_HUMAN	16	6	-1.48556	5.78274e-12	1.17522	0.846742	1.8693e-10	0.472942	9.72832	['O43852']	CALU
934	sp|P22314|UBA1_HUMAN	32	14	1.13299	5.95362e-12	0.863775	1.14671	1.90974e-10	-0.408779	9.71903	['P22314']	UBA1
297	sp|O60841|IF2P_HUMAN	20	11	-4.01102	6.09597e-12	0.330541	1.11917	1.94047e-10	-1.75953	9.71209	['O60841']	EIF5B
2989	sp|Q96AY3|FKB10_HUMAN	15	6	2.59624	8.54682e-12	1.17231	0.841115	2.69217e-10	0.478975	9.5699	['Q96AY3']	FKBP10
1984	sp|Q13838|DX39B_HUMAN	15	8	1.77059	8.60949e-12	0.804825	1.23834	2.69217e-10	-0.62166	9.5699	['Q13838']	DDX39B
1055	sp|P30491|1B53_HUMAN;sp|P30685|1B35_HUMAN	10	5	5.70693	8.65111e-12	1.69636	0.230033	2.69217e-10	2.88253	9.5699	['P30491', 'P30685']	HLA-B
2191	sp|Q16531|DDB1_HUMAN	26	9	-8.32766	1.19915e-11	0.388071	1.11274	3.70404e-10	-1.51972	9.43132	['Q16531']	DDB1
620	sp|P07195|LDHB_HUMAN	18	9	3.26344	1.21599e-11	0.785202	1.25403	3.72845e-10	-0.675432	9.42847	['P07195']	LDHB
2218	sp|Q16822|PCKGM_HUMAN	10	5	-0.831921	1.30346e-11	1.22383	0.574212	3.96746e-10	1.09175	9.40149	['Q16822']	PCK2
1948	sp|Q13509|TBB3_HUMAN	15	6	1.29739	1.341e-11	0.81779	1.21962	4.05214e-10	-0.57663	9.39232	['Q13509']	TUBB3
3927	sp|Q9ULW0|TPX2_HUMAN	18	10	1.61398	1.35259e-11	1.1363	0.541702	4.05776e-10	1.06877	9.39171	['Q9ULW0']	TPX2
1835	sp|Q08945|SSRP1_HUMAN	16	6	-4.95058	1.53822e-11	0.799099	1.22279	4.58169e-10	-0.613731	9.33897	['Q08945']	SSRP1
752	sp|P11940|PABP1_HUMAN	29	9	3.6033	1.63383e-11	0.841236	1.1989	4.83197e-10	-0.511127	9.31588	['P11940']	PABPC1
2250	sp|Q32P51|RA1L2_HUMAN	13	7	3.75553	1.81203e-11	1.22809	0.820502	5.28402e-10	0.581837	9.27704	['Q32P51']	HNRNPA1L2
693	sp|P09651|ROA1_HUMAN	20	7	1.64044	1.81203e-11	1.2302	0.819252	5.28402e-10	0.586511	9.27704	['P09651']	HNRNPA1
42	sp|O00231|PSD11_HUMAN	17	10	-0.735185	2.02173e-11	0.355198	1.1241	5.85458e-10	-1.66208	9.2325	['O00231']	PSMD11
809	sp|P14923|PLAK_HUMAN	15	9	-3.05097	2.06905e-11	0.272232	1.18532	5.95031e-10	-2.12236	9.22546	['P14923']	JUP
1659	sp|P68400|CSK21_HUMAN	12	3	-7.73888	2.4204e-11	0.840534	1.18972	6.91306e-10	-0.501244	9.16033	['P68400']	CSNK2A1
574	sp|P04843|RPN1_HUMAN	29	12	-0.0368306	2.51395e-11	1.2709	0.766144	7.13141e-10	0.730163	9.14682	['P04843']	RPN1
665	sp|P08621|RU17_HUMAN	15	5	-5.52934	2.78744e-11	0.821309	1.17378	7.85379e-10	-0.515171	9.10492	['P08621']	SNRNP70
1771	sp|Q02878|RL6_HUMAN	16	5	9.40061	2.86651e-11	0.848097	1.16631	7.99677e-10	-0.459649	9.09709	['Q02878']	RPL6
1717	sp|P98175|RBM10_HUMAN	12	5	5.98845	2.87653e-11	1.18232	0.841276	7.99677e-10	0.490963	9.09709	['P98175']	RBM10
1773	sp|Q02952|AKA12_HUMAN	66	20	0.911407	3.01678e-11	1.16681	0.857845	8.33111e-10	0.443787	9.0793	['Q02952']	AKAP12
1099	sp|P33176|KINH_HUMAN	34	10	-2.73141	3.936e-11	0.834371	1.18704	1.07981e-09	-0.508613	8.96665	['P33176']	KIF5B
1599	sp|P62750|RL23A_HUMAN	8	3	-5.1222	4.10466e-11	0.771195	1.28278	1.11872e-09	-0.734103	8.95128	['P62750']	RPL23A
2016	sp|Q14195|DPYL3_HUMAN	20	12	8.86758	4.38051e-11	0.479776	1.21027	1.18615e-09	-1.33489	8.92586	['Q14195']	DPYSL3
1980	sp|Q13740|CD166_HUMAN	14	7	-3.86868	4.47276e-11	1.14945	0.315724	1.20332e-09	1.86421	8.91962	['Q13740']	ALCAM
2297	sp|Q58FF7|H90B3_HUMAN	20	8	-3.72513	5.31958e-11	0.418956	1.19324	1.41533e-09	-1.51001	8.84914	['Q58FF7']	HSP90AB3P
972	sp|P25205|MCM3_HUMAN	23	9	-1.63631	5.32871e-11	0.846168	1.1903	1.41533e-09	-0.492303	8.84914	['P25205']	MCM3
612	sp|P06744|G6PI_HUMAN	19	8	0.826664	5.45873e-11	0.458225	1.26095	1.44069e-09	-1.46038	8.84143	['P06744']	GPI
772	sp|P12956|XRCC6_HUMAN	33	9	0.906383	6.50123e-11	0.343353	1.23118	1.70504e-09	-1.84228	8.76827	['P12956']	XRCC6
1570	sp|P62158|CALM_HUMAN	9	6	-1.21516	7.50543e-11	1.35826	0.338162	1.9561e-09	2.00597	8.70861	['P62158']	CALM1
1580	sp|P62269|RS18_HUMAN	13	5	-5.17642	9.12214e-11	0.876148	1.14489	2.36269e-09	-0.385961	8.62659	['P62269']	RPS18
2195	sp|Q16555|DPYL2_HUMAN	17	10	-0.896204	9.33057e-11	0.373719	1.19395	2.40176e-09	-1.67571	8.61947	['Q16555']	DPYSL2
2027	sp|Q14257|RCN2_HUMAN	13	4	1.95174	9.42702e-11	1.18826	0.822141	2.40822e-09	0.531396	8.6183	['Q14257']	RCN2
1110	sp|P34932|HSP74_HUMAN	39	16	2.39216	9.47116e-11	0.27241	1.10416	2.40822e-09	-2.0191	8.6183	['P34932']	HSPA4
1449	sp|P54652|HSP72_HUMAN	30	10	0.388751	9.68951e-11	0.764657	1.27483	2.4488e-09	-0.737415	8.61105	['P54652']	HSPA2
3463	sp|Q9H492|MLP3A_HUMAN	2	2	#NAME?	1.17714e-10	0.520105	1.12713	2.95704e-09	-1.11578	8.52914	['Q9H492']	MAP1LC3A
562	sp|P04114|APOB_HUMAN	4	2	#NAME?	1.3029e-10	1.13102	0.199209	3.25335e-09	2.50527	8.48767	['P04114']	APOB
1179	sp|P39748|FEN1_HUMAN	11	5	3.16996	1.37327e-10	0.837129	1.17007	3.40866e-09	-0.483071	8.46742	['P39748']	FEN1
2983	sp|Q96AC1|FERM2_HUMAN	24	10	-5.18448	1.66582e-10	0.44724	1.2298	4.11035e-09	-1.45931	8.38612	['Q96AC1']	FERMT2
272	sp|O60506|HNRPQ_HUMAN	28	8	-5.81776	1.76415e-10	0.880878	1.12472	4.32735e-09	-0.352547	8.36378	['O60506']	SYNCRIP
2163	sp|Q15691|MARE1_HUMAN	12	7	2.83779	1.85806e-10	0.854334	1.16711	4.53106e-09	-0.450065	8.3438	['Q15691']	MAPRE1
3589	sp|Q9NQC3|RTN4_HUMAN	9	5	-0.273646	1.89872e-10	1.17224	0.844453	4.6033e-09	0.473181	8.33693	['Q9NQC3']	RTN4
1593	sp|P62424|RL7A_HUMAN	16	9	0.48037	1.98537e-10	0.771949	1.29088	4.78554e-09	-0.741779	8.32007	['P62424']	RPL7A
1686	sp|P80303|NUCB2_HUMAN	12	7	5.26746	2.11467e-10	1.16747	0.854467	5.05061e-09	0.450289	8.29666	['P80303']	NUCB2
597	sp|P05783|K1C18_HUMAN	27	7	3.69264	2.11956e-10	0.808734	1.22284	5.05061e-09	-0.596495	8.29666	['P05783']	KRT18
3741	sp|Q9NZN4|EHD2_HUMAN	9	3	-2.88079	2.31147e-10	0.763972	1.31224	5.47662e-09	-0.780435	8.26149	['Q9NZN4']	EHD2
1919	sp|Q13310|PABP4_HUMAN	25	10	-0.925319	2.45964e-10	0.497013	1.09864	5.79473e-09	-1.14436	8.23697	['Q13310']	PABPC4
827	sp|P16070|CD44_HUMAN	10	3	3.80049	2.62316e-10	1.20514	0.824298	6.11883e-09	0.54796	8.21333	['P16070']	CD44
1553	sp|P61769|B2MG_HUMAN	4	4	2.48583	2.62655e-10	1.77412	0.177465	6.11883e-09	3.3215	8.21333	['P61769']	B2M
1348	sp|P50395|GDIB_HUMAN	20	10	4.0081	3.1536e-10	0.490804	1.1599	7.30583e-09	-1.24078	8.13633	['P50395']	GDI2
1114	sp|P35222|CTNB1_HUMAN	19	8	1.48084	3.19455e-10	1.16818	0.364183	7.35981e-09	1.68153	8.13313	['P35222']	CTNNB1
4029	sp|Q9Y2X3|NOP58_HUMAN	20	7	-2.60019	3.40007e-10	1.18749	0.355471	7.79028e-09	1.74012	8.10845	['Q9Y2X3']	NOP58
1988	sp|Q13885|TBB2A_HUMAN	20	8	3.10472	3.49285e-10	0.841862	1.185	7.95912e-09	-0.493228	8.09913	['Q13885']	TUBB2A
651	sp|P08133|ANXA6_HUMAN	32	11	10.4502	3.91153e-10	0.512151	1.12832	8.86471e-09	-1.13954	8.05234	['P08133']	ANXA6
4156	sp|Q9Y6K5|OAS3_HUMAN	9	7	-6.88617	4.05344e-10	0.66134	0.354669	9.13668e-09	0.89892	8.03921	['Q9Y6K5']	OAS3
548	sp|P02545|LMNA_HUMAN	39	8	5.39625	4.3611e-10	1.14166	0.873441	9.77731e-09	0.386349	8.00978	['P02545']	LMNA
255	sp|O60264|SMCA5_HUMAN	31	13	2.21151	4.43623e-10	1.15696	0.863125	9.89255e-09	0.422693	8.00469	['O60264']	SMARCA5
1444	sp|P54136|SYRC_HUMAN	31	11	-0.777351	4.99131e-10	0.808131	1.22008	1.10712e-08	-0.59432	7.95581	['P54136']	RARS
3222	sp|Q99798|ACON_HUMAN	24	12	-2.31909	5.1419e-10	1.254	0.784014	1.13448e-08	0.677587	7.9452	['Q99798']	ACO2
773	sp|P13010|XRCC5_HUMAN	28	8	7.54773	5.884e-10	0.773592	1.28386	1.29138e-08	-0.730841	7.88894	['P13010']	XRCC5
2098	sp|Q15046|SYK_HUMAN	25	9	-2.88807	6.24972e-10	0.493005	1.16293	1.36447e-08	-1.23809	7.86504	['Q15046']	KARS
1281	sp|P48444|COPD_HUMAN	15	9	1.30503	6.37008e-10	0.853997	1.18134	1.3835e-08	-0.468122	7.85902	['P48444']	ARCN1
2605	sp|Q8IUE6|H2A2B_HUMAN	5	3	-5.70529	6.72459e-10	0.235318	1.38077	1.45293e-08	-2.55279	7.83776	['Q8IUE6']	HIST2H2AB
796	sp|P14314|GLU2B_HUMAN	20	8	9.08601	7.15472e-10	1.18937	0.83877	1.53297e-08	0.503845	7.81447	['P14314']	PRKCSH
1093	sp|P32455|GBP1_HUMAN	10	3	5.72552	7.16858e-10	0.599483	0.165718	1.53297e-08	1.85499	7.81447	['P32455']	GBP1
3284	sp|Q9BTT0|AN32E_HUMAN	8	4	5.00485	7.76277e-10	0.812537	1.21538	1.65157e-08	-0.580902	7.7821	['Q9BTT0']	ANP32E
1191	sp|P40925|MDHC_HUMAN	11	7	0.802663	8.23123e-10	0.858693	1.16181	1.74235e-08	-0.436159	7.75887	['P40925']	MDH1
824	sp|P15880|RS2_HUMAN	13	8	6.08136	8.39845e-10	0.833851	1.1999	1.76876e-08	-0.525057	7.75233	['P15880']	RPS2
3182	sp|Q99439|CNN2_HUMAN	12	6	2.6689	8.54541e-10	0.754239	1.35896	1.78616e-08	-0.849408	7.74808	['Q99439']	CNN2
3143	sp|Q96QK1|VPS35_HUMAN	15	10	-0.41758	8.56669e-10	0.335563	1.12841	1.78616e-08	-1.74964	7.74808	['Q96QK1']	VPS35
1198	sp|P41219|PERI_HUMAN	5	3	-3.82588	8.71426e-10	1.10176	0.907637	1.80788e-08	0.279626	7.74283	['P41219']	PRPH
1142	sp|P35749|MYH11_HUMAN	27	9	-1.89882	9.39195e-10	0.846294	1.16691	1.93883e-08	-0.463461	7.71246	['P35749']	MYH11
1508	sp|P60660|MYL6_HUMAN	10	5	4.13602	9.49072e-10	0.780874	1.28062	1.94957e-08	-0.713676	7.71006	['P60660']	MYL6
4026	sp|Q9Y2W1|TR150_HUMAN	29	14	5.52941	9.75954e-10	1.1261	0.88105	1.99496e-08	0.354042	7.70006	['Q9Y2W1']	THRAP3
1601	sp|P62805|H4_HUMAN	8	5	-0.141544	1.17659e-09	0.846131	1.17886	2.39336e-08	-0.478436	7.62099	['P62805']	HIST1H4A
450	sp|O95202|LETM1_HUMAN	23	9	-7.59303	1.22927e-09	1.12985	0.296393	2.48838e-08	1.93055	7.60408	['O95202']	LETM1
533	sp|P00558|PGK1_HUMAN	22	8	2.93619	1.34273e-09	0.858838	1.17528	2.70492e-08	-0.452543	7.56785	['P00558']	PGK1
2072	sp|Q14980|NUMA1_HUMAN	77	32	-4.71229	1.42049e-09	1.02294	0.533379	2.84781e-08	0.939496	7.54549	['Q14980']	NUMA1
1432	sp|P53621|COPA_HUMAN	29	11	-2.12191	1.65334e-09	0.865628	1.15226	3.29877e-08	-0.41265	7.48165	['P53621']	COPA
30	sp|O00148|DX39A_HUMAN	14	6	-0.0346047	1.78923e-09	0.782374	1.27881	3.5529e-08	-0.708871	7.44942	['O00148']	DDX39A
1483	sp|P56182|RRP1_HUMAN	14	5	7.24673	1.7984e-09	1.26878	0.767196	3.55419e-08	0.725772	7.44926	['P56182']	RRP1
1655	sp|P68104|EF1A1_HUMAN	23	11	4.73179	1.84647e-09	0.890275	1.1252	3.61491e-08	-0.337864	7.4419	['P68104']	EEF1A1
2363	sp|Q5VTE0|EF1A3_HUMAN	21	11	5.11386	1.84647e-09	0.890192	1.12531	3.61491e-08	-0.338128	7.4419	['Q5VTE0']	EEF1A1P5
2510	sp|Q7L1Q6|BZW1_HUMAN	12	6	-3.52744	1.91197e-09	0.523784	1.22762	3.72567e-08	-1.22882	7.4288	['Q7L1Q6']	BZW1
1084	sp|P31939|PUR9_HUMAN	21	10	2.26253	2.04127e-09	0.43759	1.20409	3.95912e-08	-1.4603	7.4024	['P31939']	ATIC
986	sp|P26196|DDX6_HUMAN	12	5	-0.87904	2.3042e-09	0.817581	1.20692	4.44839e-08	-0.561894	7.3518	['P26196']	DDX6
559	sp|P04075|ALDOA_HUMAN	23	10	2.278	2.36869e-09	0.863729	1.14568	4.55182e-08	-0.407559	7.34181	['P04075']	ALDOA
1255	sp|P46777|RL5_HUMAN	12	5	2.0204	2.62464e-09	0.794178	1.24753	5.02052e-08	-0.651544	7.29925	['P46777']	RPL5
1094	sp|P32456|GBP2_HUMAN	3	3	#NAME?	2.72139e-09	0.70761	0.219288	5.18182e-08	1.69013	7.28552	['P32456']	GBP2
857	sp|P17812|PYRG1_HUMAN	10	7	0.375317	2.78241e-09	0.593781	1.15064	5.27393e-08	-0.954429	7.27787	['P17812']	CTPS1
703	sp|P0C0S8|H2A1_HUMAN;sp|Q16777|H2A2C_HUMAN;sp|Q6FI13|H2A2A_HUMAN;sp|Q93077|H2A1C_HUMAN;sp|Q96KK5|H2A1H_HUMAN;sp|Q99878|H2A1J_HUMAN;sp|Q9BTM1|H2AJ_HUMAN	5	3	-6.36965	2.8197e-09	0.210354	1.25649	5.32044e-08	-2.5785	7.27405	['P0C0S8', 'Q16777', 'Q6FI13', 'Q93077', 'Q96KK5', 'Q99878', 'Q9BTM1']	HIST1H2AG
1999	sp|Q14061|COX17_HUMAN	3	3	-0.484858	2.97671e-09	1.14004	0.648706	5.59139e-08	0.813447	7.25248	['Q14061']	COX17
3431	sp|Q9H223|EHD4_HUMAN	20	9	3.7174	3.0268e-09	1.11598	0.889791	5.65997e-08	0.326778	7.24719	['Q9H223']	EHD4
3720	sp|Q9NYL9|TMOD3_HUMAN	18	5	2.16036	3.05434e-09	0.892725	1.11797	5.68598e-08	-0.324593	7.24519	['Q9NYL9']	TMOD3
1573	sp|P62241|RS8_HUMAN	10	4	-2.81474	3.09201e-09	0.821257	1.23953	5.73052e-08	-0.593885	7.24181	['P62241']	RPS8
2723	sp|Q8NBJ4|GOLM1_HUMAN	17	6	7.542	3.11898e-09	1.20514	0.827755	5.75494e-08	0.541926	7.23996	['Q8NBJ4']	GOLM1
1058	sp|P30512|1A29_HUMAN	5	4	0.596467	3.14012e-09	1.47758	0.161444	5.76842e-08	3.19413	7.23894	['P30512']	HLA-A
2087	sp|Q15019|SEPT2_HUMAN	15	7	-0.127656	3.22247e-09	0.850446	1.16387	5.89372e-08	-0.452641	7.22961	['Q15019']	2002-09-01
52	sp|O00303|EIF3F_HUMAN	7	4	8.43362	3.25689e-09	0.821404	1.22939	5.93067e-08	-0.581776	7.2269	['O00303']	EIF3F
1541	sp|P61289|PSME3_HUMAN	10	5	-2.57458	3.69043e-09	0.829777	1.19929	6.6909e-08	-0.531389	7.17452	['P61289']	PSME3
1877	sp|Q12959|DLG1_HUMAN	17	9	-5.17936	3.92079e-09	0.88536	1.11926	7.07779e-08	-0.338215	7.1501	['Q12959']	DLG1
1926	sp|Q13404|UB2V1_HUMAN	5	3	-0.203056	4.0774e-09	0.862732	1.1647	7.32878e-08	-0.432969	7.13497	['Q13404']	UBE2V1
4075	sp|Q9Y490|TLN1_HUMAN	94	28	3.13969	4.21996e-09	0.897755	1.11047	7.55246e-08	-0.306778	7.12191	['Q9Y490']	TLN1
610	sp|P06733|ENOA_HUMAN	21	9	12.074	4.26665e-09	0.831901	1.20035	7.60338e-08	-0.528968	7.11899	['P06733']	ENO1
1634	sp|P63162|RSMN_HUMAN	7	5	0.643267	4.64172e-09	0.847112	0.757651	8.23658e-08	0.161019	7.08425	['P63162']	SNRPN
1086	sp|P31943|HNRH1_HUMAN	23	9	-10.6103	4.76167e-09	0.27871	1.23355	8.41363e-08	-2.14598	7.07502	['P31943']	HNRNPH1
1608	sp|P62851|RS25_HUMAN	6	4	4.51031	4.79361e-09	0.849782	1.16446	8.43009e-08	-0.454503	7.07417	['P62851']	RPS25
1480	sp|P55884|EIF3B_HUMAN	21	10	0.00610384	4.81142e-09	0.385551	1.16616	8.43009e-08	-1.59677	7.07417	['P55884']	EIF3B
1306	sp|P49368|TCPG_HUMAN	35	14	1.42277	4.91043e-09	0.861565	1.15661	8.56758e-08	-0.424868	7.06714	['P49368']	CCT3
955	sp|P23526|SAHH_HUMAN	17	8	0.47627	4.95023e-09	0.856525	1.17052	8.60102e-08	-0.450579	7.06545	['P23526']	AHCY
2206	sp|Q16666|IF16_HUMAN	16	6	-2.60236	4.97115e-09	0.369865	0.0760655	8.60154e-08	2.28168	7.06542	['Q16666']	IFI16
1723	sp|Q00341|VIGLN_HUMAN	41	18	0.524188	5.11219e-09	0.891103	1.11384	8.80903e-08	-0.321883	7.05507	['Q00341']	HDLBP
595	sp|P05455|LA_HUMAN	21	11	-2.47159	5.63421e-09	0.857853	1.13997	9.66859e-08	-0.410197	7.01464	['P05455']	SSB
2186	sp|Q16352|AINX_HUMAN	6	4	#NAME?	5.67036e-09	1.14452	0.534113	9.69074e-08	1.09953	7.01364	['Q16352']	INA
816	sp|P15311|EZRI_HUMAN	29	15	3.14314	5.79407e-09	0.882212	1.11957	9.86174e-08	-0.343749	7.00605	['P15311']	EZR
3982	sp|Q9Y224|CN166_HUMAN	14	6	-4.48092	5.93213e-09	0.330621	1.12857	1.00557e-07	-1.77124	6.99759	['Q9Y224']	C14orf166
1868	sp|Q12888|TP53B_HUMAN	33	15	-0.867125	6.03205e-09	1.13636	0.876357	1.01837e-07	0.374828	6.9921	['Q12888']	TP53BP1
397	sp|O75937|DNJC8_HUMAN	9	5	0.103694	7.60849e-09	0.588589	1.17227	1.27933e-07	-0.993976	6.89302	['O75937']	DNAJC8
1120	sp|P35241|RADI_HUMAN	25	13	-2.14354	7.73628e-09	0.349405	1.10578	1.29559e-07	-1.66209	6.88753	['P35241']	RDX
1754	sp|Q01995|TAGL_HUMAN	16	9	5.16491	8.02691e-09	0.817327	1.2235	1.33889e-07	-0.582028	6.87326	['Q01995']	TAGLN
3608	sp|Q9NR31|SAR1A_HUMAN	4	3	-3.13489	9.1419e-09	0.73658	1.07561	1.51879e-07	-0.546234	6.8185	['Q9NR31']	SAR1A
3207	sp|Q99615|DNJC7_HUMAN	18	6	-10.7419	9.82371e-09	0.34855	1.06717	1.62559e-07	-1.61435	6.78899	['Q99615']	DNAJC7
1173	sp|P38919|IF4A3_HUMAN	22	9	-4.97971	1.07311e-08	0.527593	1.14186	1.76872e-07	-1.11389	6.75234	['P38919']	EIF4A3
854	sp|P17661|DESM_HUMAN	6	2	12.1044	1.10326e-08	1.21368	0.82394	1.81125e-07	0.558777	6.74202	['P17661']	DES
1908	sp|Q13200|PSMD2_HUMAN	26	11	-9.31587	1.1183e-08	0.532129	1.15629	1.82875e-07	-1.11966	6.73785	['Q13200']	PSMD2
3467	sp|Q9H4B7|TBB1_HUMAN	5	3	-0.214769	1.16836e-08	0.767495	1.31176	1.90315e-07	-0.773275	6.72053	['Q9H4B7']	TUBB1
1108	sp|P34897|GLYM_HUMAN	20	9	3.1239	1.31989e-08	1.11357	0.896535	2.1416e-07	0.312755	6.66926	['P34897']	SHMT2
28	sp|O00116|ADAS_HUMAN	14	8	-7.14191	1.50353e-08	1.15406	0.250307	2.43013e-07	2.20494	6.61437	['O00116']	AGPS
1421	sp|P52948|NUP98_HUMAN	30	10	-0.331137	1.75027e-08	1.08849	0.261138	2.818e-07	2.05945	6.55006	['P52948']	NUP98
589	sp|P05198|IF2A_HUMAN	18	11	-4.5823	1.84361e-08	0.382762	1.0988	2.95687e-07	-1.52141	6.52917	['P05198']	EIF2S1
807	sp|P14866|HNRPL_HUMAN	19	8	-1.24069	2.04363e-08	1.21339	0.821391	3.26511e-07	0.562903	6.4861	['P14866']	HNRNPL
149	sp|O15212|PFD6_HUMAN	7	3	-3.01425	2.06867e-08	0.787779	1.21406	3.29249e-07	-0.623978	6.48248	['O15212']	PFDN6
1652	sp|P67936|TPM4_HUMAN	21	8	-5.67872	2.16342e-08	0.708981	1.43029	3.43021e-07	-1.01249	6.46468	['P67936']	TPM4
1758	sp|Q02218|ODO1_HUMAN	24	7	-2.70218	2.20108e-08	1.15462	0.334883	3.4767e-07	1.78569	6.45883	['Q02218']	OGDH
254	sp|O60256|KPRB_HUMAN	10	5	5.18935	2.21621e-08	0.397679	1.43847	3.48739e-07	-1.85486	6.4575	['O60256']	PRPSAP2
2918	sp|Q92734|TFG_HUMAN	6	3	0.172002	2.30758e-08	0.841023	1.18117	3.61753e-07	-0.489995	6.44159	['Q92734']	TFG
1842	sp|Q09666|AHNK_HUMAN	254	122	-0.60187	2.43135e-08	0.936111	1.06591	3.79728e-07	-0.18734	6.42053	['Q09666']	AHNAK
1038	sp|P30040|ERP29_HUMAN	9	6	9.63689	2.45627e-08	1.14339	0.870334	3.82188e-07	0.393675	6.41772	['P30040']	ERP29
2084	sp|Q15008|PSMD6_HUMAN	13	5	-4.22799	2.51839e-08	0.862016	1.16665	3.90397e-07	-0.436586	6.40849	['Q15008']	PSMD6
58	sp|O00410|IPO5_HUMAN	29	10	2.8391	2.78405e-08	0.420545	1.24336	4.29981e-07	-1.56391	6.36655	['O00410']	IPO5
3177	sp|Q96TC7|RMD3_HUMAN	10	3	1.77709	3.10064e-08	1.1465	0.398262	4.7711e-07	1.52545	6.32138	['Q96TC7']	RMDN3
1365	sp|P50993|AT1A2_HUMAN	14	8	3.57217	3.23711e-08	0.619597	0.891846	4.96278e-07	-0.525464	6.30428	['P50993']	ATP1A2
1743	sp|Q01581|HMCS1_HUMAN	14	9	0.966723	3.34928e-08	0.524239	1.13169	5.11593e-07	-1.11018	6.29108	['Q01581']	HMGCS1
3728	sp|Q9NZ08|ERAP1_HUMAN	9	4	-6.01823	3.37795e-08	1.18943	0.289133	5.1409e-07	2.04046	6.28896	['Q9NZ08']	ERAP1
1064	sp|P30566|PUR8_HUMAN	10	4	-5.03758	4.18086e-08	0.377123	1.10392	6.3397e-07	-1.54953	6.19793	['P30566']	ADSL
1620	sp|P62937|PPIA_HUMAN	11	5	9.09702	4.32342e-08	0.838946	1.18772	6.53212e-07	-0.501543	6.18495	['P62937']	PPIA
274	sp|O60518|RNBP6_HUMAN	3	2	-3.10329	4.56995e-08	0.719902	1.38908	6.87967e-07	-0.948253	6.16243	['O60518']	RANBP6
3738	sp|Q9NZM1|MYOF_HUMAN	70	22	-3.15532	4.63965e-08	1.1153	0.894866	6.95947e-07	0.317687	6.15742	['Q9NZM1']	MYOF
4101	sp|Q9Y5B9|SP16H_HUMAN	23	10	-2.97687	4.71944e-08	0.877384	1.14579	7.05378e-07	-0.385064	6.15158	['Q9Y5B9']	SUPT16H
1013	sp|P28072|PSB6_HUMAN	4	3	-1.30415	4.77478e-08	0.760818	1.25631	7.11102e-07	-0.723571	6.14807	['P28072']	PSMB6
4096	sp|Q9Y520|PRC2C_HUMAN	26	7	-9.71107	5.19331e-08	1.24079	0.33754	7.7068e-07	1.87813	6.11313	['Q9Y520']	PRRC2C
2011	sp|Q14157|UBP2L_HUMAN	20	8	-0.366211	5.35006e-08	0.523078	1.17076	7.91126e-07	-1.16235	6.10175	['Q14157']	UBAP2L
821	sp|P15531|NDKA_HUMAN	9	5	-0.203877	5.39732e-08	0.877199	1.14503	7.95294e-07	-0.384404	6.09947	['P15531']	NME1
236	sp|O43809|CPSF5_HUMAN	11	6	-0.819358	6.0659e-08	0.246543	1.23528	8.90663e-07	-2.32493	6.05029	['O43809']	NUDT21
1578	sp|P62263|RS14_HUMAN	5	2	-12.1034	6.1273e-08	0.889195	1.11144	8.9449e-07	-0.32186	6.04842	['P62263']	RPS14
1152	sp|P36578|RL4_HUMAN	19	8	4.31674	6.13487e-08	0.870708	1.14488	8.9449e-07	-0.394933	6.04842	['P36578']	RPL4
1540	sp|P61254|RL26_HUMAN	9	5	3.89929	6.24256e-08	0.844992	1.1985	9.07021e-07	-0.504223	6.04238	['P61254']	RPL26
2133	sp|Q15370|ELOB_HUMAN	4	3	0.5609	6.33508e-08	0.753905	1.27879	9.17267e-07	-0.762326	6.0375	['Q15370']	TCEB2
2036	sp|Q14498|RBM39_HUMAN	11	4	2.88115	6.71688e-08	0.868261	1.14678	9.69183e-07	-0.401383	6.01359	['Q14498']	RBM39
3057	sp|Q96FW1|OTUB1_HUMAN	8	5	1.31531	6.85655e-08	0.44885	1.22451	9.85925e-07	-1.4479	6.00616	['Q96FW1']	OTUB1
1105	sp|P33993|MCM7_HUMAN	26	12	-1.62027	7.15269e-08	0.487433	1.15062	1.02497e-06	-1.23914	5.98929	['P33993']	MCM7
1054	sp|P30486|1B48_HUMAN;sp|Q31610|1B81_HUMAN	4	3	7.79139	7.27748e-08	1.61405	0.191853	1.03928e-06	3.07261	5.98327	['P30486', 'Q31610']	HLA-B
987	sp|P26232|CTNA2_HUMAN	9	4	#NAME?	7.76934e-08	1.24832	0.199032	1.10473e-06	2.64892	5.95674	['P26232']	CTNNA2
3867	sp|Q9UID3|VPS51_HUMAN	3	3	#NAME?	7.78874e-08	0.480188	0.426661	1.10473e-06	0.170509	5.95674	['Q9UID3']	VPS51
1831	sp|Q08380|LG3BP_HUMAN	10	6	#NAME?	8.07542e-08	0.469292	0.0696117	1.14151e-06	2.75308	5.94252	['Q08380']	LGALS3BP
2092	sp|Q15029|U5S1_HUMAN	39	16	-6.41792	8.1117e-08	1.08236	0.917973	1.14276e-06	0.237659	5.94204	['Q15029']	EFTUD2
2497	sp|Q71U36|TBA1A_HUMAN	22	9	1.83375	8.40503e-08	0.868223	1.15404	1.1801e-06	-0.410552	5.92808	['Q71U36']	TUBA1A
2890	sp|Q92526|TCPW_HUMAN	7	5	1.19489	8.98821e-08	0.638501	1.11782	1.25775e-06	-0.80792	5.90041	['Q92526']	CCT6B
1577	sp|P62258|1433E_HUMAN	18	9	2.69804	9.21965e-08	0.249772	1.14863	1.28413e-06	-2.20122	5.89139	['P62258']	YWHAE
178	sp|O15523|DDX3Y_HUMAN	23	8	-6.26478	9.23832e-08	0.490195	1.11101	1.28413e-06	-1.18045	5.89139	['O15523']	DDX3Y
3501	sp|Q9H8H0|NOL11_HUMAN	14	4	-45.1937	1.13239e-07	1.16804	0.372025	1.56879e-06	1.65062	5.80443	['Q9H8H0']	NOL11
2442	sp|Q6P2Q9|PRP8_HUMAN	81	36	-9.53647	1.15035e-07	0.961467	1.03839	1.5884e-06	-0.111043	5.79904	['Q6P2Q9']	PRPF8
1729	sp|Q00610|CLH1_HUMAN	64	21	3.91404	1.15462e-07	0.891615	1.11729	1.58903e-06	-0.325509	5.79887	['Q00610']	CLTC
775	sp|P13164|IFM1_HUMAN	2	2	-2.47562	1.18869e-07	1.40102	0.156645	1.63053e-06	3.1609	5.78767	['P13164']	IFITM1
4068	sp|Q9Y3T9|NOC2L_HUMAN	10	5	0.746898	1.2421e-07	1.11053	0.887251	1.69822e-06	0.323839	5.77001	['Q9Y3T9']	NOC2L
3094	sp|Q96IZ0|PAWR_HUMAN	12	5	-15.1348	1.28675e-07	0.364235	1.14369	1.75352e-06	-1.65076	5.75609	['Q96IZ0']	PAWR
200	sp|O43396|TXNL1_HUMAN	10	5	-1.58947	1.37894e-07	0.84194	1.18773	1.87302e-06	-0.496419	5.72746	['O43396']	TXNL1
1233	sp|P43490|NAMPT_HUMAN	16	7	-1.00682	1.51237e-07	0.896209	1.11768	2.0476e-06	-0.318595	5.68876	['P43490']	NAMPT
2116	sp|Q15181|IPYR_HUMAN	11	6	-13.1861	1.52868e-07	0.367087	1.11196	2.05839e-06	-1.5989	5.68647	['Q15181']	PPA1
1811	sp|Q06830|PRDX1_HUMAN	13	7	12.3518	1.53022e-07	0.85076	1.16894	2.05839e-06	-0.45838	5.68647	['Q06830']	PRDX1
1683	sp|P78540|ARGI2_HUMAN	6	4	0.0717371	1.57978e-07	0.608941	1.134	2.11822e-06	-0.897042	5.67403	['P78540']	ARG2
3887	sp|Q9UJZ1|STML2_HUMAN	13	6	3.67243	1.77619e-07	1.13257	0.882321	2.37395e-06	0.360225	5.62453	['Q9UJZ1']	STOML2
1230	sp|P43304|GPDM_HUMAN	26	10	0.758805	1.78821e-07	1.12832	0.431205	2.38238e-06	1.38773	5.62299	['P43304']	GPD2
333	sp|O75347|TBCA_HUMAN	10	6	-2.18095	1.82501e-07	0.774731	1.2778	2.42366e-06	-0.721899	5.61553	['O75347']	TBCA
1946	sp|Q13501|SQSTM_HUMAN	3	2	#NAME?	1.91908e-07	1.12482	0.460644	2.5405e-06	1.28798	5.59508	['Q13501']	SQSTM1
363	sp|O75534|CSDE1_HUMAN	27	10	-1.95699	1.97855e-07	0.316726	0.71903	2.61093e-06	-1.18282	5.5832	['O75534']	CSDE1
2065	sp|Q14839|CHD4_HUMAN	44	15	-2.22348	1.98697e-07	1.16575	0.848492	2.61378e-06	0.458284	5.58273	['Q14839']	CHD4
1454	sp|P54727|RD23B_HUMAN	12	8	0.164956	2.00828e-07	0.829894	1.17185	2.6335e-06	-0.497786	5.57947	['P54727']	RAD23B
1316	sp|P49588|SYAC_HUMAN	21	10	-3.2759	2.10972e-07	0.304144	1.06746	2.75785e-06	-1.81136	5.55943	['P49588']	AARS
2886	sp|Q92499|DDX1_HUMAN	24	7	-0.357406	2.12305e-07	0.858816	1.16978	2.7666e-06	-0.445816	5.55805	['Q92499']	DDX1
707	sp|P0CG12|CTF8A_HUMAN	4	2	-1.15029	2.15863e-07	0.835408	1.18541	2.8042e-06	-0.504828	5.55219	['P0CG12']	CHTF8
3339	sp|Q9BXJ9|NAA15_HUMAN	16	7	-7.79243	2.16652e-07	0.256544	1.06617	2.80458e-06	-2.05516	5.55213	['Q9BXJ9']	NAA15
2219	sp|Q16836|HCDH_HUMAN	9	5	-2.70868	2.17846e-07	1.04959	0.351005	2.80458e-06	1.58026	5.55213	['Q16836']	HADH
859	sp|P17844|DDX5_HUMAN	30	13	-0.0603005	2.1791e-07	1.08432	0.920034	2.80458e-06	0.23703	5.55213	['P17844']	DDX5
845	sp|P17174|AATC_HUMAN	14	6	-5.00369	2.28447e-07	0.889082	1.11147	2.93116e-06	-0.322078	5.53296	['P17174']	GOT1
476	sp|O95433|AHSA1_HUMAN	11	6	2.90363	2.3119e-07	0.474503	1.16033	2.95725e-06	-1.29005	5.52911	['O95433']	AHSA1
1097	sp|P32969|RL9_HUMAN	6	3	-4.80854	2.34275e-07	0.754388	1.27611	2.98754e-06	-0.758378	5.52469	['P32969']	RPL9
1080	sp|P31689|DNJA1_HUMAN	10	7	-0.230049	2.39149e-07	1.15751	0.61204	3.0404e-06	0.919324	5.51707	['P31689']	DNAJA1
2518	sp|Q7L5N1|CSN6_HUMAN	4	3	-2.83159	2.43482e-07	0.509248	1.27388	3.08608e-06	-1.32279	5.51059	['Q7L5N1']	COPS6
621	sp|P07196|NFL_HUMAN	3	3	#NAME?	2.5648e-07	1.16587	0.464826	3.24097e-06	1.32665	5.48932	['P07196']	NEFL
1035	sp|P29966|MARCS_HUMAN	12	4	-5.20559	2.75069e-07	0.775456	1.28202	3.46537e-06	-0.725305	5.46025	['P29966']	MARCKS
764	sp|P12277|KCRB_HUMAN	15	8	2.79937	2.77264e-07	0.850726	1.17332	3.4825e-06	-0.46383	5.45811	['P12277']	CKB
1034	sp|P29728|OAS2_HUMAN	4	3	-104.986	2.7923e-07	0.723961	0.403541	3.49666e-06	0.843199	5.45635	['P29728']	OAS2
1800	sp|Q05639|EF1A2_HUMAN	19	10	3.07525	2.80139e-07	0.861563	1.14686	3.49755e-06	-0.412657	5.45624	['Q05639']	EEF1A2
2057	sp|Q14696|MESD_HUMAN	10	5	7.32681	2.84555e-07	1.21164	0.827453	3.54207e-06	0.550214	5.45074	['Q14696']	MESDC2
1234	sp|P43686|PRS6B_HUMAN	21	10	-0.249842	2.86488e-07	0.359483	0.638208	3.55552e-06	-0.828105	5.4491	['P43686']	PSMC4
2197	sp|Q16576|RBBP7_HUMAN	16	10	-15.3202	2.94042e-07	1.04181	0.406748	3.63844e-06	1.35688	5.43908	['Q16576']	RBBP7
1073	sp|P31150|GDIA_HUMAN	15	6	-1.6284	2.95979e-07	0.798281	1.24176	3.65158e-06	-0.63742	5.43752	['P31150']	GDI1
3873	sp|Q9UIQ6|LCAP_HUMAN	13	6	-1.94196	2.97869e-07	1.16237	0.332257	3.66405e-06	1.8067	5.43604	['Q9UIQ6']	LNPEP
3706	sp|Q9NXW2|DJB12_HUMAN	4	3	9.4269	3.04883e-07	1.20054	0.552064	3.7393e-06	1.12078	5.42721	['Q9NXW2']	DNAJB12
351	sp|O75475|PSIP1_HUMAN	22	9	0.226151	3.06923e-07	1.14022	0.871596	3.75328e-06	0.387587	5.42559	['O75475']	PSIP1
674	sp|P08865|RSSA_HUMAN	10	5	0.125342	3.26797e-07	0.82976	1.20431	3.98462e-06	-0.537442	5.39961	['P08865']	RPSA
1138	sp|P35613|BASI_HUMAN	10	7	-2.51989	3.36658e-07	1.14474	0.248545	4.09279e-06	2.20344	5.38798	['P35613']	BSG
804	sp|P14678|RSMB_HUMAN	10	6	-0.132048	3.37631e-07	0.793245	1.24347	4.09279e-06	-0.64853	5.38798	['P14678']	SNRPB
3194	sp|Q99538|LGMN_HUMAN	2	2	-5.88032	3.4293e-07	1.30144	0.419175	4.14498e-06	1.63448	5.38248	['Q99538']	LGMN
3314	sp|Q9BVJ6|UT14A_HUMAN	17	8	-1.27279	3.80194e-07	1.10462	0.60422	4.58211e-06	0.870409	5.33893	['Q9BVJ6']	UTP14A
2699	sp|Q8N5N7|RM50_HUMAN	5	3	-20.2503	3.8237e-07	0.598757	0.468246	4.59505e-06	0.354705	5.33771	['Q8N5N7']	MRPL50
2756	sp|Q8NE71|ABCF1_HUMAN	19	7	9.57415	3.88943e-07	0.886777	1.12619	4.66061e-06	-0.344812	5.33156	['Q8NE71']	ABCF1
289	sp|O60763|USO1_HUMAN	14	5	-9.89483	4.24326e-07	0.516743	1.17291	5.07003e-06	-1.18257	5.29499	['O60763']	USO1
1787	sp|Q04323|UBXN1_HUMAN	7	3	-13.3218	4.33296e-07	0.847954	1.17204	5.16134e-06	-0.466961	5.28724	['Q04323']	UBXN1
1749	sp|Q01813|PFKAP_HUMAN	28	12	0.905296	4.34444e-07	0.861727	1.15865	5.16134e-06	-0.427149	5.28724	['Q01813']	PFKP
1810	sp|Q06787|FMR1_HUMAN	10	4	-3.41735	4.46768e-07	0.391477	1.1341	5.29267e-06	-1.53455	5.27632	['Q06787']	FMR1
2977	sp|Q96A33|CCD47_HUMAN	14	10	-4.20343	4.5962e-07	1.15863	0.408689	5.4295e-06	1.50334	5.26524	['Q96A33']	CCDC47
1330	sp|P49756|RBM25_HUMAN	21	9	0.97421	4.69637e-07	1.15266	0.855576	5.53217e-06	0.430001	5.2571	['P49756']	RBM25
3844	sp|Q9UHB6|LIMA1_HUMAN	27	15	-6.79197	5.10352e-07	0.464473	0.992155	5.99484e-06	-1.09497	5.22222	['Q9UHB6']	LIMA1
694	sp|P09661|RU2A_HUMAN	13	7	-4.07695	5.15258e-07	0.878292	1.12173	6.03547e-06	-0.352953	5.21929	['P09661']	SNRPA1
1875	sp|Q12931|TRAP1_HUMAN	31	13	-7.65925	5.24589e-07	1.07557	0.451044	6.12755e-06	1.25376	5.21271	['Q12931']	TRAP1
4054	sp|Q9Y3B8|ORN_HUMAN	5	2	6.66367	5.28818e-07	0.862358	1.16876	6.15969e-06	-0.438615	5.21044	['Q9Y3B8']	REXO2
4055	sp|Q9Y3B9|RRP15_HUMAN	7	4	-18.1863	5.36392e-07	1.12269	0.525695	6.23052e-06	1.09466	5.20548	['Q9Y3B9']	RRP15
641	sp|P07919|QCR6_HUMAN	4	4	3.3342	5.39002e-07	1.34884	0.730433	6.24344e-06	0.884892	5.20458	['P07919']	UQCRH
873	sp|P18621|RL17_HUMAN	7	4	-3.18286	5.446e-07	0.422068	1.25476	6.29081e-06	-1.57187	5.20129	['P18621']	RPL17
2724	sp|Q8NBJ5|GT251_HUMAN	13	8	-9.97185	5.47553e-07	1.02397	0.56088	6.30744e-06	0.868406	5.20015	['Q8NBJ5']	COLGALT1
128	sp|O14980|XPO1_HUMAN	25	10	-4.89053	5.49542e-07	0.351477	1.18726	6.31292e-06	-1.75614	5.19977	['O14980']	XPO1
3265	sp|Q9BRT2|UQCC2_HUMAN	5	3	3.17373	5.75913e-07	1.19223	0.591151	6.59768e-06	1.01207	5.18061	['Q9BRT2']	UQCC2
1650	sp|P67812|SC11A_HUMAN	8	3	1.14297	6.26116e-07	1.10046	0.902759	7.15316e-06	0.28569	5.1455	['P67812']	SEC11A
1502	sp|P60174|TPIS_HUMAN	14	8	-2.12488	6.30067e-07	0.773201	1.27844	7.17863e-06	-0.725466	5.14396	['P60174']	TPI1
624	sp|P07205|PGK2_HUMAN	4	3	-4.35124	6.97738e-07	0.861513	1.17389	7.92798e-06	-0.446353	5.10084	['P07205']	PGK2
938	sp|P22626|ROA2_HUMAN	22	11	-3.49633	7.38068e-07	0.856013	1.15671	8.3376e-06	-0.43432	5.07896	['P22626']	HNRNPA2B1
935	sp|P22392|NDKB_HUMAN	11	3	7.16967	7.39787e-07	0.878516	1.13828	8.3376e-06	-0.373718	5.07896	['P22392']	NME2
265	sp|O60361|NDK8_HUMAN	8	3	-2.2518	7.39787e-07	0.239701	0.984453	8.3376e-06	-2.03809	5.07896	['O60361']	NME2P1
352	sp|O75477|ERLN1_HUMAN	6	4	-3.93482	7.42016e-07	1.19806	0.825058	8.34019e-06	0.53813	5.07882	['O75477']	ERLIN1
1744	sp|Q01628|IFM3_HUMAN	2	2	-18.1129	7.50858e-07	1.72559	0.100285	8.41688e-06	4.1049	5.07485	['Q01628']	IFITM3
1653	sp|P68032|ACTC_HUMAN	18	9	0.938966	7.58974e-07	0.720425	1.3519	8.48505e-06	-0.908067	5.07135	['P68032']	ACTC1
4142	sp|Q9Y6B6|SAR1B_HUMAN	4	3	-17.6375	7.89588e-07	0.496037	0.733144	8.8037e-06	-0.563647	5.05533	['Q9Y6B6']	SAR1B
2732	sp|Q8NBS9|TXND5_HUMAN	18	9	1.47059	8.31388e-07	1.11184	0.904011	9.24503e-06	0.298532	5.03409	['Q8NBS9']	TXNDC5
2296	sp|Q58FF6|H90B4_HUMAN	10	3	#NAME?	8.36863e-07	0.430999	1.08591	9.25802e-06	-1.33315	5.03348	['Q58FF6']	HSP90AB4P
993	sp|P26599|PTBP1_HUMAN	16	7	-1.90283	8.36996e-07	1.40287	0.730296	9.25802e-06	0.941826	5.03348	['P26599']	PTBP1
927	sp|P22033|MUTA_HUMAN	16	6	-3.9526	8.43887e-07	0.440184	1.15167	9.30955e-06	-1.38754	5.03107	['P22033']	MUT
1916	sp|Q13283|G3BP1_HUMAN	18	9	-0.747027	8.74674e-07	0.791788	1.23162	9.62372e-06	-0.637372	5.01666	['Q13283']	G3BP1
3353	sp|Q9BY77|PDIP3_HUMAN	14	7	-7.18237	8.90417e-07	0.335049	1.0309	9.77115e-06	-1.62146	5.01005	['Q9BY77']	POLDIP3
3990	sp|Q9Y266|NUDC_HUMAN	15	8	0.0371675	9.72848e-07	0.858419	1.1478	1.0637e-05	-0.419114	4.97318	['Q9Y266']	NUDC
4066	sp|Q9Y3I0|RTCB_HUMAN	18	10	2.65084	9.74423e-07	0.314837	1.14709	1.0637e-05	-1.86531	4.97318	['Q9Y3I0']	RTCB
234	sp|O43776|SYNC_HUMAN	17	9	-6.38511	1.00956e-06	0.352616	1.08726	1.09918e-05	-1.62453	4.95893	['O43776']	NARS
1368	sp|P51114|FXR1_HUMAN	16	7	-0.0833822	1.01638e-06	0.466686	1.16304	1.10373e-05	-1.31737	4.95714	['P51114']	FXR1
2053	sp|Q14690|RRP5_HUMAN	36	14	-3.92599	1.03797e-06	1.10789	0.897827	1.12424e-05	0.303306	4.94914	['Q14690']	PDCD11
2954	sp|Q93052|LPP_HUMAN	11	5	-1.05183	1.06302e-06	0.813254	1.2002	1.14481e-05	-0.561501	4.94127	['Q93052']	LPP
3327	sp|Q9BWF3|RBM4_HUMAN	16	6	-7.09651	1.06501e-06	1.18968	0.850368	1.14481e-05	0.484415	4.94127	['Q9BWF3']	RBM4
3499	sp|Q9H857|NT5D2_HUMAN	2	2	#NAME?	1.0652e-06	0.373989	1.00933	1.14481e-05	-1.43233	4.94127	['Q9H857']	NT5DC2
3073	sp|Q96GQ7|DDX27_HUMAN	16	13	-5.84231	1.11683e-06	0.970972	0.631605	1.19722e-05	0.620407	4.92183	['Q96GQ7']	DDX27
3351	sp|Q9BY44|EIF2A_HUMAN	14	7	-0.496077	1.11974e-06	0.353806	1.21267	1.19726e-05	-1.77716	4.92181	['Q9BY44']	EIF2A
3733	sp|Q9NZI8|IF2B1_HUMAN	16	9	5.40052	1.14217e-06	0.848134	1.1567	1.21812e-05	-0.447649	4.91431	['Q9NZI8']	IGF2BP1
2620	sp|Q8IVT5|KSR1_HUMAN	7	4	#NAME?	1.22964e-06	0.602927	1.14118	1.30806e-05	-0.920466	4.88337	['Q8IVT5']	KSR1
370	sp|O75643|U520_HUMAN	83	35	-29.6998	1.33408e-06	0.942098	0.462636	1.41555e-05	1.026	4.84907	['O75643']	SNRNP200
2221	sp|Q16851|UGPA_HUMAN	15	8	-3.52218	1.38603e-06	0.379475	1.08181	1.46694e-05	-1.51138	4.83359	['Q16851']	UGP2
3239	sp|Q9BQ04|RBM4B_HUMAN	14	5	-5.24105	1.39872e-06	1.21487	0.842403	1.47662e-05	0.52822	4.83073	['Q9BQ04']	RBM4B
2324	sp|Q5M775|CYTSB_HUMAN	19	7	-6.25488	1.41865e-06	1.12765	0.403444	1.49389e-05	1.48288	4.82568	['Q5M775']	SPECC1
33	sp|O00159|MYO1C_HUMAN	30	13	2.64803	1.43284e-06	0.971075	0.473342	1.50503e-05	1.0367	4.82246	['O00159']	MYO1C
1174	sp|P39019|RS19_HUMAN	10	3	-0.00649634	1.49071e-06	0.768024	1.3422	1.56187e-05	-0.805375	4.80635	['P39019']	RPS19
1583	sp|P62280|RS11_HUMAN	9	5	-0.834511	1.56081e-06	0.85154	1.17447	1.63123e-05	-0.463867	4.78749	['P62280']	RPS11
1855	sp|Q12788|TBL3_HUMAN	17	8	-7.75203	1.7444e-06	1.09191	0.33101	1.81367e-05	1.72191	4.74144	['Q12788']	TBL3
65	sp|O00468|AGRIN_HUMAN	10	6	-2.19629	1.74518e-06	0.587432	0.287818	1.81367e-05	1.02926	4.74144	['O00468']	AGRN
3269	sp|Q9BS26|ERP44_HUMAN	14	7	3.54487	1.74843e-06	1.09307	0.517016	1.81367e-05	1.0801	4.74144	['Q9BS26']	ERP44
1186	sp|P40429|RL13A_HUMAN	6	4	-0.538121	1.75746e-06	0.828614	1.21906	1.81696e-05	-0.556991	4.74065	['P40429']	RPL13A
2889	sp|Q92522|H1X_HUMAN	6	2	-6.55712	1.76032e-06	1.16726	0.834258	1.81696e-05	0.484555	4.74065	['Q92522']	H1FX
795	sp|P14209|CD99_HUMAN	3	3	#NAME?	1.88898e-06	0.713401	0.967718	1.94495e-05	-0.439873	4.71109	['P14209']	CD99
3763	sp|Q9P0V9|SEP10_HUMAN	10	4	-6.09884	1.90991e-06	0.585998	1.16472	1.96165e-05	-0.991012	4.70738	['Q9P0V9']	2010-09-01
981	sp|P25787|PSA2_HUMAN	9	5	2.89876	1.96918e-06	0.875798	0.422712	2.01756e-05	1.05092	4.69517	['P25787']	PSMA2
3326	sp|Q9BWD1|THIC_HUMAN	10	7	5.2433	2.02604e-06	0.781435	1.25741	2.07073e-05	-0.686254	4.68388	['Q9BWD1']	ACAT2
1711	sp|P84098|RL19_HUMAN	4	2	-5.83298	2.06478e-06	0.844162	1.17481	2.10517e-05	-0.476833	4.67671	['P84098']	RPL19
2205	sp|Q16658|FSCN1_HUMAN	10	3	2.45493	2.13203e-06	0.821291	1.21044	2.16843e-05	-0.559563	4.66385	['Q16658']	FSCN1
405	sp|O76003|GLRX3_HUMAN	9	4	-3.78986	2.15675e-06	0.4322	1.14613	2.18824e-05	-1.407	4.65991	['O76003']	GLRX3
2046	sp|Q14651|PLSI_HUMAN	6	4	0.805343	2.40246e-06	0.838193	1.19341	2.43161e-05	-0.509737	4.61411	['Q14651']	PLS1
1906	sp|Q13185|CBX3_HUMAN	7	5	-0.30977	2.44059e-06	1.15509	0.863883	2.46423e-05	0.419093	4.60832	['Q13185']	CBX3
3048	sp|Q96F07|CYFP2_HUMAN	4	4	-2.59784	2.46119e-06	0.576634	1.15197	2.47686e-05	-0.998381	4.6061	['Q96F07']	CYFIP2
2930	sp|Q92841|DDX17_HUMAN	32	9	-5.7193	2.46498e-06	1.0962	0.906562	2.47686e-05	0.274036	4.6061	['Q92841']	DDX17
3695	sp|Q9NX40|OCAD1_HUMAN	6	4	-1.27435	2.47712e-06	0.663264	0.82498	2.48308e-05	-0.314777	4.60501	['Q9NX40']	OCIAD1
3857	sp|Q9UHV9|PFD2_HUMAN	6	3	-2.977	2.53937e-06	0.870481	1.14879	2.53937e-05	-0.400232	4.59527	['Q9UHV9']	PFDN2
863	sp|P17987|TCPA_HUMAN	26	9	1.39627	2.63315e-06	0.849111	1.17403	2.62685e-05	-0.467445	4.58056	['P17987']	TCP1
1833	sp|Q08722|CD47_HUMAN	3	3	-0.959271	2.85181e-06	0.821265	0.452094	2.83554e-05	0.861226	4.54736	['Q08722']	CD47
1543	sp|P61326|MGN_HUMAN;sp|Q96A72|MGN2_HUMAN	8	5	-5.83949	2.85594e-06	1.10737	0.61675	2.83554e-05	0.844385	4.54736	['P61326', 'Q96A72']	MAGOH
4113	sp|Q9Y5M8|SRPRB_HUMAN	12	6	1.46875	2.8635e-06	1.15872	0.851989	2.83629e-05	0.443622	4.54725	['Q9Y5M8']	SRPRB
341	sp|O75381|PEX14_HUMAN	6	5	#NAME?	2.91734e-06	0.699349	0.288665	2.88277e-05	1.27662	4.54019	['O75381']	PEX14
1536	sp|P61221|ABCE1_HUMAN	20	10	3.47159	2.96623e-06	0.861144	1.17404	2.92415e-05	-0.447152	4.534	['P61221']	ABCE1
1442	sp|P54105|ICLN_HUMAN	7	5	1.42438	3.00894e-06	0.466273	1.12937	2.95927e-05	-1.27627	4.52882	['P54105']	CLNS1A
1227	sp|P43121|MUC18_HUMAN	23	8	-1.66267	3.09582e-06	1.17891	0.832051	3.03755e-05	0.502711	4.51748	['P43121']	MCAM
729	sp|P11142|HSP7C_HUMAN	37	10	-6.03615	3.1793e-06	0.826519	1.20781	3.11213e-05	-0.547269	4.50694	['P11142']	HSPA8
696	sp|P09874|PARP1_HUMAN	41	13	-7.07638	3.19397e-06	0.851685	1.15117	3.11842e-05	-0.434714	4.50607	['P09874']	PARP1
3780	sp|Q9P2I0|CPSF2_HUMAN	7	5	-3.52511	3.20068e-06	1.11098	0.596139	3.11842e-05	0.898107	4.50607	['Q9P2I0']	CPSF2
3906	sp|Q9UKX7|NUP50_HUMAN	15	5	-5.51418	3.23732e-06	1.17844	0.844371	3.14677e-05	0.480934	4.50214	['Q9UKX7']	NUP50
1431	sp|P53618|COPB_HUMAN	22	9	-0.278487	3.40023e-06	0.308822	1.11916	3.29743e-05	-1.85756	4.48182	['P53618']	COPB1
3196	sp|Q99543|DNJC2_HUMAN	5	4	-0.214291	3.43435e-06	0.534666	1.08666	3.32279e-05	-1.02319	4.4785	['Q99543']	DNAJC2
2164	sp|Q15717|ELAV1_HUMAN	12	6	1.17127	3.46445e-06	0.88999	1.11897	3.34416e-05	-0.330316	4.47571	['Q15717']	ELAVL1
4135	sp|Q9Y676|RT18B_HUMAN	8	6	-1.09383	3.70378e-06	1.14637	0.576158	3.55996e-05	0.992536	4.44856	['Q9Y676']	MRPS18B
2971	sp|Q969V3|NCLN_HUMAN	13	7	-4.9625	3.70509e-06	1.12182	0.506222	3.55996e-05	1.148	4.44856	['Q969V3']	NCLN
2261	sp|Q3ZCM7|TBB8_HUMAN	11	6	8.98836	3.92032e-06	0.850827	1.17533	3.7581e-05	-0.466123	4.42503	['Q3ZCM7']	TUBB8
1600	sp|P62753|RS6_HUMAN	8	3	1.63487	4.17098e-06	0.294663	1.16265	3.98922e-05	-1.98028	4.39911	['P62753']	RPS6
864	sp|P18031|PTN1_HUMAN	13	7	-0.594518	4.24249e-06	1.20893	0.842477	4.04832e-05	0.521016	4.39272	['P18031']	PTPN1
1953	sp|Q13547|HDAC1_HUMAN	11	4	-13.1501	4.2711e-06	0.795007	1.26589	4.06632e-05	-0.671108	4.3908	['Q13547']	HDAC1
1415	sp|P52788|SPSY_HUMAN	7	2	-15.5422	4.31687e-06	0.663851	1.40165	4.10053e-05	-1.07819	4.38716	['P52788']	SMS
753	sp|P12004|PCNA_HUMAN	14	8	0.458598	4.38109e-06	0.910094	1.10246	4.15208e-05	-0.276644	4.38173	['P12004']	PCNA
2619	sp|Q8IVS2|FABD_HUMAN	5	3	#NAME?	4.39426e-06	1.05874	0.30519	4.15512e-05	1.79456	4.38142	['Q8IVS2']	MCAT
1513	sp|P60891|PRPS1_HUMAN	11	6	-1.01372	4.52162e-06	0.756913	1.33332	4.26587e-05	-0.816826	4.36999	['P60891']	PRPS1
2148	sp|Q15459|SF3A1_HUMAN	29	15	-9.199	4.66794e-06	1.08494	0.914927	4.39398e-05	0.245884	4.35714	['Q15459']	SF3A1
3532	sp|Q9HB58|SP110_HUMAN	10	5	-1.96972	4.72973e-06	0.434141	0.107905	4.44211e-05	2.0084	4.35241	['Q9HB58']	SP110
3775	sp|Q9P289|MST4_HUMAN	8	2	-0.234145	4.89489e-06	0.582415	1.22577	4.5869e-05	-1.07357	4.33848	['Q9P289']	MST4
3653	sp|Q9NUQ6|SPS2L_HUMAN	6	3	-10.1833	5.36717e-06	1.24304	0.198553	5.01819e-05	2.64628	4.29945	['Q9NUQ6']	SPATS2L
3406	sp|Q9H078|CLPB_HUMAN	8	4	#NAME?	5.49698e-06	0.902264	0.259517	5.12806e-05	1.79772	4.29005	['Q9H078']	CLPB
3618	sp|Q9NRL2|BAZ1A_HUMAN	16	8	-4.99068	5.53222e-06	1.1158	0.477653	5.14941e-05	1.22405	4.28824	['Q9NRL2']	BAZ1A
2126	sp|Q15293|RCN1_HUMAN	16	6	-0.404516	5.55948e-06	1.13967	0.88825	5.16325e-05	0.359581	4.28708	['Q15293']	RCN1
1572	sp|P62195|PRS8_HUMAN	16	11	-3.50229	5.7016e-06	0.895073	1.12679	5.28348e-05	-0.332136	4.27708	['P62195']	PSMC5
922	sp|P21399|ACOC_HUMAN	12	8	0.0289566	5.74242e-06	0.207912	0.54105	5.30951e-05	-1.37979	4.27495	['P21399']	ACO1
181	sp|O43143|DHX15_HUMAN	29	16	-14.0409	5.89823e-06	0.989062	1.01111	5.44151e-05	-0.0318024	4.26428	['O43143']	DHX15
1053	sp|P30419|NMT1_HUMAN	13	5	-5.39238	6.0026e-06	0.894852	1.11153	5.52557e-05	-0.312826	4.25762	['P30419']	NMT1
3278	sp|Q9BT78|CSN4_HUMAN	12	5	0.441551	6.50596e-06	0.530205	1.11485	5.97574e-05	-1.07223	4.22361	['Q9BT78']	COPS4
497	sp|O95757|HS74L_HUMAN	15	7	-6.57552	6.78794e-06	0.533493	1.09627	6.22104e-05	-1.03906	4.20614	['O95757']	HSPA4L
1649	sp|P67809|YBOX1_HUMAN	14	4	-4.64763	6.81667e-06	0.686555	1.40094	6.23367e-05	-1.02895	4.20526	['P67809']	YBX1
828	sp|P16104|H2AX_HUMAN	5	2	-12.4317	6.93523e-06	0.813441	1.22935	6.32821e-05	-0.595781	4.19872	['P16104']	H2AFX
3261	sp|Q9BRK5|CAB45_HUMAN	10	4	-3.95785	7.1548e-06	1.23672	0.810263	6.51431e-05	0.610058	4.18613	['Q9BRK5']	SDF4
1657	sp|P68366|TBA4A_HUMAN	21	7	0.490629	7.42287e-06	0.86867	1.15162	6.74365e-05	-0.40678	4.1711	['P68366']	TUBA4A
3936	sp|Q9UMS4|PRP19_HUMAN	14	8	-3.30129	7.48864e-06	1.02158	0.425051	6.78862e-05	1.26509	4.16822	['Q9UMS4']	PRPF19
628	sp|P07355|ANXA2_HUMAN	25	7	-7.28123	7.73721e-06	0.800786	1.22585	6.99873e-05	-0.614298	4.15498	['P07355']	ANXA2
3294	sp|Q9BUF5|TBB6_HUMAN	19	10	8.03394	7.87653e-06	0.801399	1.23717	7.10934e-05	-0.626447	4.14817	['Q9BUF5']	TUBB6
2058	sp|Q14697|GANAB_HUMAN	35	19	-3.14768	7.98629e-06	0.93211	1.07444	7.19283e-05	-0.205011	4.1431	['Q14697']	GANAB
410	sp|O76094|SRP72_HUMAN	8	5	-6.47796	8.07836e-06	0.32104	1.10775	7.26008e-05	-1.78681	4.13906	['O76094']	SRP72
3662	sp|Q9NVA2|SEP11_HUMAN	15	8	0.967077	8.27804e-06	0.516689	1.09449	7.42354e-05	-1.08289	4.12939	['Q9NVA2']	2011-09-01
636	sp|P07814|SYEP_HUMAN	49	20	-11.8442	8.40915e-06	0.898772	1.11726	7.52492e-05	-0.313937	4.1235	['P07814']	EPRS
4158	sp|Q9Y6M1|IF2B2_HUMAN	13	4	0.443056	8.4376e-06	0.893565	1.12934	7.53422e-05	-0.33784	4.12296	['Q9Y6M1']	IGF2BP2
3847	sp|Q9UHD1|CHRD1_HUMAN	7	5	-0.149526	8.61563e-06	0.397316	1.21718	7.67675e-05	-1.61519	4.11482	['Q9UHD1']	CHORDC1
3641	sp|Q9NTJ3|SMC4_HUMAN	24	12	-5.13035	8.67212e-06	0.479823	0.714522	7.7106e-05	-0.574476	4.11291	['Q9NTJ3']	SMC4
904	sp|P20618|PSB1_HUMAN	7	6	6.19341	9.32073e-06	0.841221	1.18518	8.26967e-05	-0.494553	4.08251	['P20618']	PSMB1
555	sp|P02795|MT2_HUMAN	2	2	2.54929	9.40385e-06	1.50542	0.476202	8.3257e-05	1.66052	4.07958	['P02795']	MT2A
623	sp|P07203|GPX1_HUMAN	3	3	#NAME?	9.93964e-06	1.09689	0.66242	8.78142e-05	0.727608	4.05644	['P07203']	GPX1
2639	sp|Q8IXI1|MIRO2_HUMAN	7	3	4.25304	1.0107e-05	1.13616	0.886584	8.91039e-05	0.357836	4.0501	['Q8IXI1']	RHOT2
3724	sp|Q9NYU2|UGGG1_HUMAN	33	13	-3.64218	1.0136e-05	0.580697	0.878517	8.91716e-05	-0.597284	4.04977	['Q9NYU2']	UGGT1
1731	sp|Q00765|REEP5_HUMAN	6	3	-9.27268	1.03412e-05	1.16535	0.265865	9.07845e-05	2.13199	4.04199	['Q00765']	REEP5
567	sp|P04264|K2C1_HUMAN	18	9	5.97309	1.05954e-05	0.413652	1.09094	9.28208e-05	-1.39908	4.03235	['P04264']	KRT1
581	sp|P05106|ITB3_HUMAN	7	3	1.75429	1.07477e-05	1.1439	0.864096	9.39577e-05	0.404694	4.02707	['P05106']	ITGB3
432	sp|O94925|GLSK_HUMAN	12	7	-1.58257	1.0787e-05	0.860019	1.16989	9.41043e-05	-0.443927	4.02639	['O94925']	GLS
2051	sp|Q14683|SMC1A_HUMAN	41	27	#NAME?	1.09185e-05	0.388093	0.346981	9.50527e-05	0.161545	4.02204	['Q14683']	SMC1A
985	sp|P26038|MOES_HUMAN	35	13	-2.24095	1.09561e-05	0.852102	1.15721	9.51809e-05	-0.441553	4.02145	['P26038']	MSN
868	sp|P18085|ARF4_HUMAN	8	6	1.47727	1.12942e-05	0.86471	1.14827	9.7583e-05	-0.409179	4.01063	['P18085']	ARF4
1171	sp|P38606|VATA_HUMAN	14	9	-4.1335	1.12997e-05	0.406818	1.18034	9.7583e-05	-1.53675	4.01063	['P38606']	ATP6V1A
3823	sp|Q9UDY2|ZO2_HUMAN	25	14	#NAME?	1.13028e-05	0.418528	0.537394	9.7583e-05	-0.360656	4.01063	['Q9UDY2']	TJP2
3299	sp|Q9BUP3|HTAI2_HUMAN	2	2	-2.41357	1.13723e-05	1.07604	0.474902	9.798e-05	1.18003	4.00886	['Q9BUP3']	HTATIP2
2121	sp|Q15274|NADC_HUMAN	2	2	-0.752921	1.14111e-05	0.464103	1.26319	9.8112e-05	-1.44455	4.00828	['Q15274']	QPRT
1866	sp|Q12873|CHD3_HUMAN	16	5	-10.7176	1.18201e-05	1.10641	0.553868	0.000101357	0.998265	3.99415	['Q12873']	CHD3
1526	sp|P61081|UBC12_HUMAN	5	3	-0.261401	1.18371e-05	0.862001	1.15401	0.000101357	-0.420891	3.99415	['P61081']	UBE2M
3186	sp|Q99460|PSMD1_HUMAN	27	16	-33.9061	1.18805e-05	0.286653	0.410294	0.00010152	-0.517355	3.99345	['Q99460']	PSMD1
198	sp|O43390|HNRPR_HUMAN	30	23	-14.2256	1.20312e-05	1.02163	0.978556	0.000102597	0.0621453	3.98887	['O43390']	HNRNPR
3937	sp|Q9UMX0|UBQL1_HUMAN	10	6	-9.63158	1.2136e-05	0.293111	1.07983	0.00010328	-1.88129	3.98598	['Q9UMX0']	UBQLN1
260	sp|O60313|OPA1_HUMAN	28	10	-4.75774	1.23076e-05	1.05994	0.526936	0.000104527	1.00828	3.98077	['O60313']	OPA1
1259	sp|P46782|RS5_HUMAN	10	4	-5.66397	1.29973e-05	0.276602	1.43327	0.00011016	-2.37343	3.95798	['P46782']	RPS5
3373	sp|Q9BZF2|OSBL7_HUMAN	2	2	#NAME?	1.31049e-05	1.02786	0.204316	0.000110847	2.33077	3.95528	['Q9BZF2']	OSBPL7
1145	sp|P35998|PRS7_HUMAN	19	7	1.41066	1.31775e-05	0.90626	1.10648	0.000111235	-0.287975	3.95376	['P35998']	PSMC2
2137	sp|Q15393|SF3B3_HUMAN	37	14	-6.28948	1.40721e-05	0.925297	1.08452	0.000118547	-0.229068	3.92611	['Q15393']	SF3B3
530	sp|P00492|HPRT_HUMAN	9	4	-1.14232	1.42826e-05	0.600157	1.18364	0.000120078	-0.979816	3.92054	['P00492']	HPRT1
3333	sp|Q9BX40|LS14B_HUMAN	3	3	#NAME?	1.43319e-05	0.864804	0.624737	0.00012025	0.469125	3.91992	['Q9BX40']	LSM14B
2361	sp|Q5VST9|OBSCN_HUMAN	5	3	-9.30168	1.44576e-05	0.641393	0.380563	0.000121061	0.753073	3.917	['Q5VST9']	OBSCN
1304	sp|P49321|NASP_HUMAN	25	20	-26.281	1.48668e-05	0.345086	1.03341	0.000124238	-1.58238	3.90575	['P49321']	NASP
3811	sp|Q9UBS4|DJB11_HUMAN	12	6	0.0779242	1.55327e-05	1.25075	0.788685	0.000129543	0.665274	3.88759	['Q9UBS4']	DNAJB11
711	sp|P0DME0|SETLP_HUMAN	6	4	3.42513	1.57775e-05	0.852285	1.18018	0.000131322	-0.469604	3.88166	['P0DME0']	SETSIP
3348	sp|Q9BXY0|MAK16_HUMAN	6	3	-2.89556	1.60284e-05	1.14188	0.477959	0.000133144	1.25645	3.87568	['Q9BXY0']	MAK16
1737	sp|Q01105|SET_HUMAN	9	5	2.55612	1.60901e-05	0.863056	1.15862	0.000133352	-0.424885	3.875	['Q01105']	SET
3812	sp|Q9UBT2|SAE2_HUMAN	12	6	-1.73912	1.61173e-05	0.280679	1.12285	0.000133352	-2.00017	3.875	['Q9UBT2']	UBA2
1353	sp|P50502|F10A1_HUMAN	11	5	-7.07606	1.63657e-05	0.893172	1.11595	0.000135139	-0.321265	3.86922	['P50502']	ST13
2936	sp|Q92900|RENT1_HUMAN	19	8	-6.00348	1.64572e-05	0.385525	1.08044	0.000135626	-1.48672	3.86766	['Q92900']	UPF1
1464	sp|P55081|MFAP1_HUMAN	9	6	-2.05333	1.65544e-05	1.21161	0.819428	0.000136018	0.564232	3.8664	['P55081']	MFAP1
1489	sp|P56537|IF6_HUMAN	6	3	-9.37	1.65701e-05	1.18663	0.827806	0.000136018	0.5195	3.8664	['P56537']	EIF6
3922	sp|Q9ULR0|ISY1_HUMAN	4	3	0.574787	1.67782e-05	1.15145	0.548701	0.000137456	1.06936	3.86184	['Q9ULR0']	ISY1
2404	sp|Q6EEV4|GL1AD_HUMAN	3	3	-9.58594	1.69076e-05	0.480305	0.823175	0.000138107	-0.777249	3.85978	['Q6EEV4']	POLR2M
1398	sp|P52209|6PGD_HUMAN	11	5	6.28589	1.69239e-05	0.594167	1.10094	0.000138107	-0.889796	3.85978	['P52209']	PGD
1056	sp|P30493|1B55_HUMAN;sp|Q29940|1B59_HUMAN	8	2	6.69195	1.80697e-05	1.60327	0.176755	0.000147169	3.18119	3.83218	['P30493', 'Q29940']	HLA-B
3216	sp|Q99729|ROAA_HUMAN	10	4	-15.8772	1.82293e-05	1.38299	0.178258	0.00014818	2.95575	3.82921	['Q99729']	HNRNPAB
1257	sp|P46779|RL28_HUMAN	7	6	1.79168	1.9513e-05	0.858462	1.15561	0.000158306	-0.428826	3.8005	['P46779']	RPL28
2830	sp|Q8WTT2|NOC3L_HUMAN	14	6	-2.671	2.04065e-05	1.09156	0.562874	0.000165233	0.955509	3.7819	['Q8WTT2']	NOC3L
1009	sp|P27816|MAP4_HUMAN	36	12	-7.27039	2.15337e-05	0.894646	1.11229	0.000174023	-0.314149	3.75939	['P27816']	MAP4
1646	sp|P63279|UBC9_HUMAN	4	3	-7.83899	2.26709e-05	0.874787	1.14314	0.000182858	-0.385993	3.73789	['P63279']	UBE2I
1674	sp|P78357|CNTP1_HUMAN	5	2	#NAME?	2.27783e-05	1.18626	0.402903	0.00018337	1.55792	3.73667	['P78357']	CNTNAP1
1806	sp|Q06265|EXOS9_HUMAN	5	5	-16.8073	2.28881e-05	1.06302	0.625059	0.000183899	0.766104	3.73542	['Q06265']	EXOSC9
1517	sp|P60981|DEST_HUMAN	5	4	-0.213543	2.36534e-05	0.495152	1.21633	0.000189682	-1.29659	3.72197	['P60981']	DSTN
1699	sp|P82930|RT34_HUMAN	7	3	-7.70927	2.41881e-05	0.848194	1.16876	0.000193554	-0.46251	3.7132	['P82930']	MRPS34
1998	sp|Q14019|COTL1_HUMAN	8	5	-1.73547	2.4229e-05	0.510747	1.1427	0.000193554	-1.16176	3.7132	['Q14019']	COTL1
528	sp|P00441|SODC_HUMAN	7	5	-3.8181	2.51328e-05	0.403992	1.03554	0.00020039	-1.35798	3.69812	['P00441']	SOD1
503	sp|O95793|STAU1_HUMAN	15	6	-3.16308	2.55603e-05	0.885572	1.12323	0.000203409	-0.342966	3.69163	['O95793']	STAU1
1463	sp|P55072|TERA_HUMAN	41	13	-3.98798	2.64306e-05	0.903651	1.10938	0.000209934	-0.29592	3.67792	['P55072']	VCP
3262	sp|Q9BRL6|SRSF8_HUMAN	2	2	5.75675	2.73541e-05	0.906625	1.10299	0.000216365	-0.282843	3.66481	['Q9BRL6']	SRSF8
1738	sp|Q01130|SRSF2_HUMAN	4	2	-6.82972	2.73541e-05	0.906625	1.10299	0.000216365	-0.282843	3.66481	['Q01130']	SRSF2
3248	sp|Q9BQE3|TBA1C_HUMAN	21	8	1.18023	2.73959e-05	0.87443	1.1438	0.000216365	-0.387415	3.66481	['Q9BQE3']	TUBA1C
1182	sp|P40123|CAP2_HUMAN	6	3	-1.66903	2.75519e-05	0.930736	1.07626	0.000217186	-0.209585	3.66317	['P40123']	CAP2
1135	sp|P35609|ACTN2_HUMAN	15	9	-3.36427	2.77497e-05	0.873415	1.13714	0.000218317	-0.380669	3.66091	['P35609']	ACTN2
3992	sp|Q9Y277|VDAC3_HUMAN	8	4	1.06847	2.78e-05	0.481455	1.2742	0.000218317	-1.40412	3.66091	['Q9Y277']	VDAC3
2208	sp|Q16698|DECR_HUMAN	10	5	-4.64192	2.82081e-05	0.617904	0.632113	0.000221105	-0.0328008	3.6554	['Q16698']	DECR1
1704	sp|P83731|RL24_HUMAN	5	2	-1.8371	2.85301e-05	0.791808	1.26293	0.000223199	-0.673554	3.65131	['P83731']	RPL24
2187	sp|Q16401|PSMD5_HUMAN	8	5	2.25077	2.85823e-05	0.483608	1.16336	0.000223199	-1.26639	3.65131	['Q16401']	PSMD5
919	sp|P21291|CSRP1_HUMAN	8	3	-2.7299	2.90309e-05	0.520275	1.96345	0.000226278	-1.91604	3.64536	['P21291']	CSRP1
886	sp|P19367|HXK1_HUMAN	30	11	-10.104	2.92183e-05	0.885469	1.13646	0.000227314	-0.360029	3.64337	['P19367']	HK1
43	sp|O00232|PSD12_HUMAN	14	5	-2.95226	2.9454e-05	0.866606	1.16684	0.000228721	-0.429157	3.64069	['O00232']	PSMD12
3389	sp|Q9GZL7|WDR12_HUMAN	9	3	4.65061	3.11373e-05	1.11424	0.880034	0.000241343	0.340434	3.61737	['Q9GZL7']	WDR12
3782	sp|Q9P2K5|MYEF2_HUMAN	14	9	#NAME?	3.15569e-05	1.07932	0.928553	0.000243947	0.21707	3.61271	['Q9P2K5']	MYEF2
3103	sp|Q96JJ7|TMX3_HUMAN	11	4	6.54956	3.15902e-05	1.21151	0.80238	0.000243947	0.594449	3.61271	['Q96JJ7']	TMX3
1399	sp|P52272|HNRPM_HUMAN	43	16	5.59024	3.16968e-05	0.93197	1.07307	0.000244317	-0.203391	3.61205	['P52272']	HNRNPM
1514	sp|P60900|PSA6_HUMAN	8	3	11.2239	3.24932e-05	0.862359	1.15349	0.000249553	-0.419641	3.60284	['P60900']	PSMA6
3141	sp|Q96QD8|S38A2_HUMAN	3	2	-2.34548	3.24957e-05	0.858537	1.16477	0.000249553	-0.440097	3.60284	['Q96QD8']	SLC38A2
639	sp|P07910|HNRPC_HUMAN	22	5	-4.73165	3.26421e-05	1.17643	0.84004	0.000250216	0.485891	3.60168	['P07910']	HNRNPC
3758	sp|Q9P0L0|VAPA_HUMAN	13	5	8.51524	3.32675e-05	1.1288	0.893384	0.000254542	0.337432	3.59424	['Q9P0L0']	VAPA
1827	sp|Q08211|DHX9_HUMAN	50	19	0.372638	3.34643e-05	0.982698	1.0187	0.00025532	-0.0519056	3.59292	['Q08211']	DHX9
285	sp|O60716|CTND1_HUMAN	23	9	-3.5273	3.34916e-05	1.1162	0.576108	0.00025532	0.954184	3.59292	['O60716']	CTNND1
1550	sp|P61619|S61A1_HUMAN	6	5	-0.764806	3.42603e-05	1.11677	0.327746	0.000260703	1.76868	3.58385	['P61619']	SEC61A1
576	sp|P04899|GNAI2_HUMAN	12	7	-1.55523	3.54433e-05	1.11904	0.366854	0.000268889	1.60898	3.57043	['P04899']	GNAI2
3595	sp|Q9NQT5|EXOS3_HUMAN	5	3	-5.81857	3.5465e-05	1.134	0.642156	0.000268889	0.820419	3.57043	['Q9NQT5']	EXOSC3
957	sp|P23588|IF4B_HUMAN	13	5	-1.2556	3.5948e-05	0.363613	1.19896	0.000272056	-1.72131	3.56534	['P23588']	EIF4B
3184	sp|Q99447|PCY2_HUMAN	3	2	-4.80533	3.62285e-05	0.477366	1.13344	0.000273437	-1.24754	3.56314	['Q99447']	PCYT2
2478	sp|Q6W2J9|BCOR_HUMAN	2	2	-1.50323	3.62615e-05	1.74519	0.590045	0.000273437	1.56449	3.56314	['Q6W2J9']	BCOR
598	sp|P05787|K2C8_HUMAN	36	18	-4.07998	3.77032e-05	1.02421	0.977994	0.000282852	0.0666085	3.54844	['P05787']	KRT8
3193	sp|Q99536|VAT1_HUMAN	8	4	-2.48318	3.77087e-05	0.450711	1.15356	0.000282852	-1.35582	3.54844	['Q99536']	VAT1
3592	sp|Q9NQP4|PFD4_HUMAN	4	3	6.94199	3.77135e-05	0.586931	1.0905	0.000282852	-0.893731	3.54844	['Q9NQP4']	PFDN4
342	sp|O75390|CISY_HUMAN	16	6	-4.44444	3.78041e-05	0.915403	1.09909	0.000283022	-0.263835	3.54818	['O75390']	CS
2235	sp|Q2M2I5|K1C24_HUMAN	3	2	-2.54295	3.8522e-05	0.605323	1.17214	0.00028788	-0.95337	3.54079	['Q2M2I5']	KRT24
3432	sp|Q9H254|SPTN4_HUMAN	2	2	#NAME?	3.86041e-05	0.477634	1.10127	0.000287977	-1.20519	3.54064	['Q9H254']	SPTBN4
781	sp|P13646|K1C13_HUMAN	4	2	-6.78633	3.89794e-05	0.599385	1.17183	0.000290258	-0.967214	3.53722	['P13646']	KRT13
3716	sp|Q9NYF8|BCLF1_HUMAN	30	12	-10.8899	3.93247e-05	0.928912	1.08008	0.000292307	-0.217527	3.53416	['Q9NYF8']	BCLAF1
1519	sp|P61006|RAB8A_HUMAN	7	4	-13.9496	3.948e-05	0.431213	1.0372	0.000292939	-1.26622	3.53322	['P61006']	RAB8A
1488	sp|P56385|ATP5I_HUMAN	4	3	-4.15306	3.95963e-05	1.10796	0.907626	0.00029328	0.287733	3.53272	['P56385']	ATP5I
1715	sp|P98082|DAB2_HUMAN	9	4	6.48644	3.96794e-05	0.892832	1.1281	0.000293374	-0.337437	3.53258	['P98082']	DAB2
690	sp|P09543|CN37_HUMAN	17	6	2.11282	4.0903e-05	1.21835	0.821529	0.000301886	0.568539	3.52016	['P09543']	CNP
2812	sp|Q8TDI0|CHD5_HUMAN	15	7	-9.81059	4.11491e-05	1.11554	0.897371	0.000303165	0.313969	3.51832	['Q8TDI0']	CHD5
730	sp|P11166|GTR1_HUMAN	6	3	-6.98978	4.12424e-05	0.851023	1.1959	0.000303317	-0.490831	3.5181	['P11166']	SLC2A1
350	sp|O75439|MPPB_HUMAN	12	7	-16.4642	4.29074e-05	0.475616	0.52293	0.000315007	-0.136821	3.50168	['O75439']	PMPCB
3316	sp|Q9BVK6|TMED9_HUMAN	8	4	-3.81276	4.37939e-05	1.14604	0.851601	0.00032095	0.428411	3.49356	['Q9BVK6']	TMED9
2070	sp|Q14974|IMB1_HUMAN	24	9	-6.79889	4.38837e-05	0.856001	1.16509	0.000321044	-0.444752	3.49344	['Q14974']	KPNB1
704	sp|P0C7P4|UCRIL_HUMAN	8	7	-0.258279	4.61013e-05	1.13872	0.537542	0.000336677	1.08296	3.47279	['P0C7P4']	UQCRFS1P1
1563	sp|P61978|HNRPK_HUMAN	20	11	-16.4922	4.64009e-05	0.950235	1.05066	0.000338272	-0.144946	3.47073	['P61978']	HNRNPK
1782	sp|Q03518|TAP1_HUMAN	4	2	#NAME?	4.65638e-05	0.681745	0.280969	0.000338867	1.27882	3.46997	['Q03518']	TAP1
2248	sp|Q32P28|P3H1_HUMAN	10	5	-2.40499	4.69062e-05	1.13838	0.412998	0.000340764	1.46277	3.46755	['Q32P28']	LEPRE1
3486	sp|Q9H773|DCTP1_HUMAN	7	3	#NAME?	4.82433e-05	0.230873	0.594652	0.000349869	-1.36494	3.4561	['Q9H773']	DCTPP1
2690	sp|Q8N4Q1|MIA40_HUMAN	5	3	3.7848	4.92746e-05	1.24252	0.798356	0.000356728	0.638159	3.44766	['Q8N4Q1']	CHCHD4
2166	sp|Q15758|AAAT_HUMAN	7	4	-1.37258	5.141e-05	1.19392	0.80734	0.000371542	0.564453	3.42999	['Q15758']	SLC1A5
3651	sp|Q9NUP9|LIN7C_HUMAN	10	6	-11.0038	5.206e-05	0.494966	0.966286	0.000375589	-0.965123	3.42529	['Q9NUP9']	LIN7C
29	sp|O00139|KIF2A_HUMAN	13	9	#NAME?	5.62419e-05	0.409437	0.593235	0.000405059	-0.534961	3.39248	['O00139']	KIF2A
1864	sp|Q12849|GRSF1_HUMAN	18	17	#NAME?	5.7437e-05	0.454538	0.408555	0.000412952	0.153872	3.3841	['Q12849']	GRSF1
3666	sp|Q9NVH1|DJC11_HUMAN	4	3	-7.1161	6.01208e-05	1.09408	0.556707	0.000431273	0.97473	3.36525	['Q9NVH1']	DNAJC11
2785	sp|Q8NI27|THOC2_HUMAN	23	11	#NAME?	6.0192e-05	0.721416	0.527115	0.000431273	0.452714	3.36525	['Q8NI27']	THOC2
766	sp|P12532|KCRU_HUMAN	5	4	-3.22258	6.05813e-05	1.02907	0.63251	0.000433317	0.702183	3.36319	['P12532']	CKMT1A
3330	sp|Q9BWJ5|SF3B5_HUMAN	3	3	#NAME?	6.09489e-05	0.583391	0.904808	0.0004352	-0.633148	3.36131	['Q9BWJ5']	SF3B5
1260	sp|P46783|RS10_HUMAN	8	4	-1.69987	6.31921e-05	0.848048	1.17918	0.000450446	-0.475564	3.34636	['P46783']	RPS10
605	sp|P06493|CDK1_HUMAN	11	6	-0.241416	6.50038e-05	0.608212	1.17086	0.00046257	-0.944925	3.33482	['P06493']	CDK1
2342	sp|Q5T4S7|UBR4_HUMAN	20	11	-6.11429	6.58124e-05	0.271644	0.453392	0.000467526	-0.739039	3.33019	['Q5T4S7']	UBR4
2429	sp|Q6NZI2|PTRF_HUMAN	12	5	#NAME?	6.61317e-05	0.666628	0.389137	0.000468996	0.776604	3.32883	['Q6NZI2']	PTRF
1049	sp|P30153|2AAA_HUMAN	19	10	-2.09737	6.65029e-05	0.811647	1.21751	0.000470827	-0.585005	3.32714	['P30153']	PPP2R1A
1789	sp|Q04637|IF4G1_HUMAN	39	19	-11.6999	6.68294e-05	0.925437	0.478755	0.000471625	0.950846	3.3264	['Q04637']	EIF4G1
3871	sp|Q9UII4|HERC5_HUMAN	2	2	2.98692	6.6942e-05	0.723452	0.396564	0.000471625	0.867342	3.3264	['Q9UII4']	HERC5
1044	sp|P30050|RL12_HUMAN	8	5	-5.22542	6.69549e-05	1.35091	0.314726	0.000471625	2.10177	3.3264	['P30050']	RPL12
908	sp|P20700|LMNB1_HUMAN	37	13	2.49845	6.74369e-05	1.08046	0.924247	0.000474219	0.2253	3.32402	['P20700']	LMNB1
1615	sp|P62899|RL31_HUMAN	6	3	-0.000768406	6.8324e-05	0.909062	1.09827	0.000479649	-0.272782	3.31908	['P62899']	RPL31
3116	sp|Q96L92|SNX27_HUMAN	6	4	1.55704	6.87666e-05	0.516055	1.02674	0.000481944	-0.99247	3.317	['Q96L92']	SNX27
1642	sp|P63241|IF5A1_HUMAN	10	4	9.33782	7.05007e-05	0.781585	1.27108	0.000493269	-0.701586	3.30692	['P63241']	EIF5A
3013	sp|Q96CT7|CC124_HUMAN	7	3	-2.91586	7.22579e-05	0.86123	0.640476	0.000504716	0.427253	3.29695	['Q96CT7']	CCDC124
1549	sp|P61604|CH10_HUMAN	9	4	-10.8637	7.34032e-05	0.662679	1.43333	0.000511858	-1.11299	3.29085	['P61604']	HSPE1
800	sp|P14618|KPYM_HUMAN	30	10	1.5149	7.40973e-05	0.831087	1.19179	0.000515836	-0.520063	3.28749	['P14618']	PKM
3954	sp|Q9UNW1|MINP1_HUMAN	3	3	-1.49519	7.48647e-05	1.12414	0.554644	0.000520309	1.01918	3.28374	['Q9UNW1']	MINPP1
1469	sp|P55209|NP1L1_HUMAN	8	6	-42.2649	7.65164e-05	0.459984	1.15516	0.000530904	-1.32844	3.27498	['P55209']	NAP1L1
1596	sp|P62495|ERF1_HUMAN	14	7	-2.14085	7.70043e-05	0.864544	1.14305	0.000533402	-0.402882	3.27295	['P62495']	ETF1
48	sp|O00267|SPT5H_HUMAN	19	8	-6.45194	7.75417e-05	0.699414	0.511293	0.000536234	0.451997	3.27065	['O00267']	SUPT5H
909	sp|P20742|PZP_HUMAN	4	3	-7.79178	7.79059e-05	0.582356	0.322962	0.00053786	0.85054	3.26933	['P20742']	PZP
1770	sp|Q02818|NUCB1_HUMAN	17	7	-2.74712	7.85148e-05	1.18596	0.846371	0.000540986	0.486694	3.26681	['Q02818']	NUCB1
2460	sp|Q6S8J3|POTEE_HUMAN	8	4	-3.07747	7.86181e-05	0.632437	1.53729	0.000540986	-1.2814	3.26681	['Q6S8J3']	POTEE
2479	sp|Q6WCQ1|MPRIP_HUMAN	30	15	-3.6521	7.88678e-05	0.690743	0.583137	0.00054181	0.244314	3.26615	['Q6WCQ1']	MPRIP
2141	sp|Q15417|CNN3_HUMAN	14	8	-4.00926	8.18034e-05	0.766483	1.31529	0.00056041	-0.779058	3.25149	['Q15417']	CNN3
569	sp|P04626|ERBB2_HUMAN	2	2	#NAME?	8.18441e-05	0.29814	1.07076	0.00056041	-1.84457	3.25149	['P04626']	ERBB2
1103	sp|P33991|MCM4_HUMAN	24	7	2.8428	8.5181e-05	0.384338	1.18201	0.000582303	-1.62079	3.23485	['P33991']	MCM4
565	sp|P04181|OAT_HUMAN	10	5	-5.15773	8.71153e-05	0.933264	1.06942	0.000594551	-0.196472	3.22581	['P04181']	OAT
3976	sp|Q9UQE7|SMC3_HUMAN	47	30	-23.3855	8.83971e-05	0.317195	0.525862	0.000602313	-0.729315	3.22018	['Q9UQE7']	SMC3
1465	sp|P55084|ECHB_HUMAN	20	8	-1.39577	8.97681e-05	0.33254	1.04249	0.000610658	-1.64844	3.2142	['P55084']	HADHB
2463	sp|Q6UB35|C1TM_HUMAN	25	11	-5.17603	9.03811e-05	0.68924	0.460997	0.000613826	0.580248	3.21195	['Q6UB35']	MTHFD1L
2081	sp|Q15005|SPCS2_HUMAN	6	5	-14.5772	9.40026e-05	1.10792	0.49636	0.000637384	1.15839	3.1956	['Q15005']	SPCS2
814	sp|P15153|RAC2_HUMAN	3	2	12.86	9.55711e-05	0.907092	1.10242	0.000646967	-0.281358	3.18912	['P15153']	RAC2
670	sp|P08727|K1C19_HUMAN	5	3	-5.53078	9.793e-05	0.680643	1.08057	0.000661861	-0.666818	3.17923	['P08727']	KRT19
4047	sp|Q9Y3A4|RRP7A_HUMAN	3	2	#NAME?	9.85829e-05	1.09246	0.597663	0.000665195	0.870176	3.17705	['Q9Y3A4']	RRP7A
974	sp|P25391|LAMA1_HUMAN	2	2	#NAME?	0.000100536	0.981228	0.266843	0.000677275	1.8786	3.16923	['P25391']	LAMA1
163	sp|O15371|EIF3D_HUMAN	9	4	#NAME?	0.000102047	0.300964	0.16331	0.000686349	0.881977	3.16346	['O15371']	EIF3D
414	sp|O94788|AL1A2_HUMAN	13	4	-20.2845	0.000104589	0.845644	1.19155	0.000700923	-0.494715	3.15433	['O94788']	ALDH1A2
2446	sp|Q6P4E1|CASC4_HUMAN	6	2	#NAME?	0.000104682	1.12397	0.904329	0.000700923	0.31368	3.15433	['Q6P4E1']	CASC4
1520	sp|P61009|SPCS3_HUMAN	4	3	#NAME?	0.000104718	1.04681	0.555498	0.000700923	0.914151	3.15433	['P61009']	SPCS3
1082	sp|P31930|QCR1_HUMAN	18	9	2.14143	0.000106161	1.05123	0.589101	0.000709441	0.835493	3.14908	['P31930']	UQCRC1
2534	sp|Q7Z406|MYH14_HUMAN	11	3	-12.8733	0.000106613	0.858881	1.17705	0.00071132	-0.454641	3.14793	['Q7Z406']	MYH14
875	sp|P18754|RCC1_HUMAN	16	5	-7.3037	0.000112328	1.1852	0.477588	0.000748253	1.31129	3.12595	['P18754']	RCC1
1785	sp|Q03701|CEBPZ_HUMAN	27	11	1.6021	0.000112668	1.09517	0.49829	0.000749323	1.1361	3.12533	['Q03701']	CEBPZ
1000	sp|P27348|1433T_HUMAN	14	5	2.51561	0.000113642	0.253489	1.11329	0.000754599	-2.13483	3.12228	['P27348']	YWHAQ
2281	sp|Q53EL6|PDCD4_HUMAN	5	2	-3.01192	0.000114119	0.495497	1.26341	0.00075656	-1.35038	3.12116	['Q53EL6']	PDCD4
3849	sp|Q9UHD9|UBQL2_HUMAN	6	3	-6.1617	0.000114539	0.442599	1.119	0.000757648	-1.33814	3.12053	['Q9UHD9']	UBQLN2
1129	sp|P35527|K1C9_HUMAN	8	4	-6.17646	0.000114646	0.329034	1.07333	0.000757648	-1.70579	3.12053	['P35527']	KRT9
75	sp|O00566|MPP10_HUMAN	13	7	-14.2442	0.000115826	1.13787	0.569843	0.000764235	0.997702	3.11677	['O00566']	MPHOSPH10
1938	sp|Q13442|HAP28_HUMAN	6	4	1.75508	0.000117437	0.199893	1.0098	0.000773635	-2.33678	3.11146	['Q13442']	PDAP1
9	sp|A5A3E0|POTEF_HUMAN	7	5	-0.652795	0.000118297	0.677364	1.45039	0.000778075	-1.09844	3.10898	['A5A3E0']	POTEF
2659	sp|Q8IYB8|SUV3_HUMAN	6	2	#NAME?	0.000118716	1.12437	0.657571	0.000779597	0.773897	3.10813	['Q8IYB8']	SUPV3L1
1003	sp|P27482|CALL3_HUMAN	3	2	-2.19941	0.000119551	1.11349	0.454949	0.000783848	1.29132	3.10577	['P27482']	CALML3
858	sp|P17813|EGLN_HUMAN	7	4	-0.736072	0.00012373	1.22735	0.501954	0.000809972	1.28992	3.09153	['P17813']	ENG
4051	sp|Q9Y3B3|TMED7_HUMAN	5	2	0.239734	0.000125234	1.27641	0.46458	0.000818536	1.4581	3.08696	['Q9Y3B3']	TMED7
1455	sp|P54819|KAD2_HUMAN	11	4	5.71707	0.000125668	1.11105	0.431507	0.000820085	1.36447	3.08614	['P54819']	AK2
3805	sp|Q9UBM7|DHCR7_HUMAN	9	3	-3.72989	0.000127122	0.39114	1.18535	0.000827328	-1.59956	3.08232	['Q9UBM7']	DHCR7
377	sp|O75695|XRP2_HUMAN	8	3	-7.15107	0.000127174	1.15029	0.868661	0.000827328	0.405136	3.08232	['O75695']	RP2
3442	sp|Q9H2U2|IPYR2_HUMAN	6	5	-8.40013	0.000129568	1.05461	0.352908	0.00084159	1.57934	3.0749	['Q9H2U2']	PPA2
1165	sp|P37837|TALDO_HUMAN	14	7	-3.09353	0.000130388	0.217378	0.422903	0.000845594	-0.960124	3.07284	['P37837']	TALDO1
1117	sp|P35232|PHB_HUMAN	16	6	-5.95709	0.000132715	1.08402	0.375733	0.00085935	1.52862	3.06583	['P35232']	PHB
2504	sp|Q7KZF4|SND1_HUMAN	35	12	-0.997527	0.00013306	0.853677	1.16761	0.000860249	-0.451797	3.06538	['Q7KZF4']	SND1
435	sp|O94979|SC31A_HUMAN	11	5	-9.36403	0.000134764	0.66054	1.09194	0.000868403	-0.725182	3.06128	['O94979']	SEC31A
2871	sp|Q8WXF1|PSPC1_HUMAN	19	9	-15.8595	0.000134901	0.405071	1.14726	0.000868403	-1.50195	3.06128	['Q8WXF1']	PSPC1
2984	sp|Q96AE4|FUBP1_HUMAN	23	15	-8.59724	0.000134946	0.970561	1.02938	0.000868403	-0.0848838	3.06128	['Q96AE4']	FUBP1
2044	sp|Q14566|MCM6_HUMAN	27	11	0.663828	0.000139138	0.533301	0.68098	0.000893997	-0.352661	3.04866	['Q14566']	MCM6
1569	sp|P62140|PP1B_HUMAN	11	5	-3.72445	0.000141563	1.07277	0.93383	0.00090818	0.200103	3.04183	['P62140']	PPP1CB
2309	sp|Q5H9R7|PP6R3_HUMAN	15	13	-7.61033	0.000141834	0.255415	0.388393	0.000908521	-0.604671	3.04166	['Q5H9R7']	PPP6R3
631	sp|P07602|SAP_HUMAN	14	4	9.42883	0.000142763	1.22726	0.817535	0.000913069	0.58609	3.0395	['P07602']	PSAP
510	sp|O95864|FADS2_HUMAN	9	5	6.79131	0.000144328	0.807987	1.21139	0.000920615	-0.584262	3.03592	['O95864']	FADS2
1113	sp|P35221|CTNA1_HUMAN	37	9	-4.25086	0.000144384	0.45788	0.355448	0.000920615	0.36533	3.03592	['P35221']	CTNNA1
2109	sp|Q15113|PCOC1_HUMAN	8	5	-0.723036	0.000144667	0.619732	1.12715	0.000921007	-0.862964	3.03574	['Q15113']	PCOLCE
2523	sp|Q7RTS7|K2C74_HUMAN	2	2	#NAME?	0.000146195	0.760994	0.328202	0.000929322	1.2133	3.03183	['Q7RTS7']	KRT74
2533	sp|Q7Z3K3|POGZ_HUMAN	19	11	-1.77333	0.000146639	1.09507	0.913416	0.000930721	0.261675	3.03118	['Q7Z3K3']	POGZ
820	sp|P15529|MCP_HUMAN	3	2	-13.3168	0.000148199	1.13736	0.355336	0.000939194	1.67843	3.02724	['P15529']	CD46
68	sp|O00483|NDUA4_HUMAN	5	2	#NAME?	0.000148795	0.475811	0.992958	0.000941542	-1.06135	3.02616	['O00483']	NDUFA4
2851	sp|Q8WVM8|SCFD1_HUMAN	13	7	-12.2034	0.000150553	0.233021	0.562267	0.000951221	-1.2708	3.02172	['Q8WVM8']	SCFD1
755	sp|P12081|SYHC_HUMAN	12	8	-22.7706	0.000152698	0.525115	0.547822	0.000963315	-0.0610751	3.01623	['P12081']	HARS
1254	sp|P46776|RL27A_HUMAN	4	3	-7.23581	0.00015679	0.680042	1.45382	0.000987632	-1.09616	3.0054	['P46776']	RPL27A
1660	sp|P68402|PA1B2_HUMAN	4	3	1.17122	0.000157659	0.823359	1.20342	0.000991611	-0.547544	3.00366	['P68402']	PAFAH1B2
3481	sp|Q9H6S3|ES8L2_HUMAN	4	2	-5.85731	0.000161857	0.850067	1.14479	0.00101648	-0.429441	2.9929	['Q9H6S3']	EPS8L2
4014	sp|Q9Y2P8|RCL1_HUMAN	5	3	-6.25222	0.000164366	0.86513	0.841133	0.00103069	0.0405829	2.98687	['Q9Y2P8']	RCL1
3744	sp|Q9NZT2|OGFR_HUMAN	10	4	-4.06255	0.000171103	0.859168	0.408667	0.00107132	1.07201	2.97008	['Q9NZT2']	OGFR
1216	sp|P42677|RS27_HUMAN	4	4	7.02135	0.000172701	0.74736	1.3301	0.00107971	-0.83166	2.96669	['P42677']	RPS27
1007	sp|P27708|PYR1_HUMAN	38	14	-2.38969	0.000173894	0.349208	0.610062	0.00108553	-0.804869	2.96436	['P27708']	CAD
385	sp|O75822|EIF3J_HUMAN	10	5	-2.01453	0.000174433	0.715208	1.07342	0.00108727	-0.585777	2.96366	['O75822']	EIF3J
3825	sp|Q9UEE9|CFDP1_HUMAN	3	2	#NAME?	0.000176658	0.534409	1.09047	0.0010995	-1.02894	2.9588	['Q9UEE9']	CFDP1
1807	sp|Q06323|PSME1_HUMAN	10	5	4.07882	0.000183541	1.24485	0.803595	0.00114063	0.631435	2.94285	['Q06323']	PSME1
1995	sp|Q14004|CDK13_HUMAN	5	3	-2.08855	0.000184349	0.529257	0.273305	0.00114395	0.953455	2.94159	['Q14004']	CDK13
1772	sp|Q02880|TOP2B_HUMAN	37	18	-6.24872	0.000186273	0.252718	0.261872	0.00115417	-0.0513322	2.93773	['Q02880']	TOP2B
3226	sp|Q99829|CPNE1_HUMAN	7	4	3.62681	0.000186587	0.583499	1.15925	0.0011544	-0.990386	2.93764	['Q99829']	CPNE1
3217	sp|Q99733|NP1L4_HUMAN	6	3	-2.46388	0.000190813	0.874313	1.15188	0.0011788	-0.397773	2.92856	['Q99733']	NAP1L4
2940	sp|Q92925|SMRD2_HUMAN	6	3	-8.30938	0.000191565	0.245593	0.596371	0.0011817	-1.27994	2.92749	['Q92925']	SMARCD2
582	sp|P05114|HMGN1_HUMAN	6	2	7.16621	0.000193092	1.24991	0.779858	0.00118843	0.68054	2.92503	['P05114']	HMGN1
1371	sp|P51149|RAB7A_HUMAN	15	5	-8.82883	0.000193227	0.94696	1.06339	0.00118843	-0.167298	2.92503	['P51149']	RAB7A
941	sp|P22695|QCR2_HUMAN	14	5	-6.90219	0.000193611	1.17005	0.333647	0.00118904	1.81018	2.9248	['P22695']	UQCRC2
1051	sp|P30260|CDC27_HUMAN	5	3	-8.62644	0.000197488	1.08853	0.592575	0.00121107	0.877311	2.91683	['P30260']	CDC27
1656	sp|P68133|ACTS_HUMAN	16	4	9.69641	0.000198217	0.926349	1.07951	0.00121375	-0.220744	2.91587	['P68133']	ACTA1
1544	sp|P61353|RL27_HUMAN	7	6	8.59282	0.000198597	0.807342	1.22803	0.00121429	-0.605089	2.91568	['P61353']	RPL27
2922	sp|Q92769|HDAC2_HUMAN	10	6	#NAME?	0.000200525	0.41105	1.08366	0.00122429	-1.39853	2.91212	['Q92769']	HDAC2
2039	sp|Q14532|K1H2_HUMAN	2	2	#NAME?	0.000200853	0.90358	0.735502	0.0012245	0.296924	2.91204	['Q14532']	KRT32
2654	sp|Q8IY81|SPB1_HUMAN	18	9	8.14776	0.000203626	1.13101	0.878936	0.00123959	0.363785	2.90672	['Q8IY81']	FTSJ3
3949	sp|Q9UNM6|PSD13_HUMAN	12	6	-2.98708	0.000204506	0.883468	1.12297	0.00124314	-0.346067	2.90548	['Q9UNM6']	PSMD13
1267	sp|P46976|GLYG_HUMAN	3	2	2.64586	0.000208291	0.846353	1.18154	0.00126402	-0.481338	2.89825	['P46976']	GYG1
4118	sp|Q9Y5S9|RBM8A_HUMAN	6	3	7.26052	0.000208548	1.2586	0.799705	0.00126402	0.654283	2.89825	['Q9Y5S9']	RBM8A
179	sp|O15533|TPSN_HUMAN	4	3	-13.2739	0.000213606	0.462183	0.128406	0.0012928	1.84775	2.88847	['O15533']	TAPBP
3972	sp|Q9UQ16|DYN3_HUMAN	5	3	#NAME?	0.000216727	0.407293	0.638265	0.0013087	-0.64809	2.88316	['Q9UQ16']	DNM3
2049	sp|Q14676|MDC1_HUMAN	31	12	0.428593	0.000216861	1.08029	0.928477	0.0013087	0.218485	2.88316	['Q14676']	MDC1
2859	sp|Q8WWF6|DNJB3_HUMAN	2	2	-14.338	0.00021976	0.224346	1.71518	0.00132428	-2.93456	2.87802	['Q8WWF6']	DNAJB3
1901	sp|Q13151|ROA0_HUMAN	8	4	-18.8016	0.000221413	1.10022	0.518074	0.00133231	1.08657	2.87539	['Q13151']	HNRNPA0
1369	sp|P51116|FXR2_HUMAN	17	7	-11.9398	0.000224715	0.571722	1.10725	0.00135024	-0.953589	2.86959	['P51116']	FXR2
1963	sp|Q13601|KRR1_HUMAN	9	4	#NAME?	0.000225612	0.986547	0.444765	0.0013536	1.14934	2.86851	['Q13601']	KRR1
2986	sp|Q96AG4|LRC59_HUMAN	14	5	-1.48437	0.000225924	1.10675	0.908388	0.0013536	0.284956	2.86851	['Q96AG4']	LRRC59
1052	sp|P30405|PPIF_HUMAN	7	4	-0.597639	0.000228383	1.11969	0.890297	0.00136636	0.330738	2.86443	['P30405']	PPIF
2023	sp|Q14240|IF4A2_HUMAN	15	9	4.61054	0.000229245	0.862935	1.14499	0.00136956	-0.408005	2.86342	['Q14240']	EIF4A2
1568	sp|P62136|PP1A_HUMAN	12	7	-3.65265	0.000231146	0.947203	1.05349	0.00137894	-0.153436	2.86046	['P62136']	PPP1CA
2615	sp|Q8IVG5|SAM9L_HUMAN	2	2	-34.7874	0.000232441	0.452111	0.393693	0.00138468	0.199604	2.85865	['Q8IVG5']	SAMD9L
1626	sp|P63000|RAC1_HUMAN	5	4	-0.813053	0.000235338	0.93079	0.546593	0.00139995	0.767987	2.85389	['P63000']	RAC1
1161	sp|P37198|NUP62_HUMAN	7	3	-22.8634	0.000237473	1.07963	0.494761	0.00141063	1.12573	2.85059	['P37198']	NUP62
1766	sp|Q02750|MP2K1_HUMAN	12	6	-4.45358	0.000238791	0.428783	1.14981	0.00141644	-1.42307	2.8488	['Q02750']	MAP2K1
4154	sp|Q9Y6I9|TX264_HUMAN	3	2	-0.780307	0.000240436	1.09789	0.550622	0.00142417	0.995603	2.84644	['Q9Y6I9']	TEX264
1293	sp|P48735|IDHP_HUMAN	18	8	-10.4096	0.000244908	1.07819	0.927608	0.0014486	0.217025	2.83905	['P48735']	IDH2
1813	sp|Q07020|RL18_HUMAN	7	5	4.45228	0.000247025	0.817708	1.21724	0.00145906	-0.573961	2.83593	['Q07020']	RPL18
232	sp|O43765|SGTA_HUMAN	8	5	-11.8505	0.000248794	0.448236	0.992387	0.00146743	-1.14665	2.83344	['O43765']	SGTA
1376	sp|P51532|SMCA4_HUMAN	24	11	-7.86287	0.000249921	0.574861	0.601197	0.00147199	-0.0646252	2.83209	['P51532']	SMARCA4
3837	sp|Q9UGV2|NDRG3_HUMAN	4	3	#NAME?	0.000256334	0.542463	0.844244	0.00150763	-0.638137	2.8217	['Q9UGV2']	NDRG3
2108	sp|Q15102|PA1B3_HUMAN	3	3	#NAME?	0.000260873	0.536308	0.440048	0.00153217	0.285399	2.81469	['Q15102']	PAFAH1B3
1790	sp|Q04695|K1C17_HUMAN	3	2	-8.94186	0.000264488	0.644542	1.13803	0.00154904	-0.820197	2.80994	['Q04695']	KRT17
673	sp|P08779|K1C16_HUMAN	3	2	-8.94186	0.000264488	0.644542	1.13803	0.00154904	-0.820197	2.80994	['P08779']	KRT16
2722	sp|Q8NBF2|NHLC2_HUMAN	4	2	-26.9346	0.000265067	0.272372	1.34812	0.00155025	-2.3073	2.8096	['Q8NBF2']	NHLRC2
2223	sp|Q16891|IMMT_HUMAN	31	16	-4.80702	0.000279369	1.06768	0.932265	0.00163161	0.195662	2.78738	['Q16891']	IMMT
3814	sp|Q9UBU9|NXF1_HUMAN	12	4	-13.0387	0.000280504	1.11656	0.591658	0.00163595	0.916218	2.78623	['Q9UBU9']	NXF1
3901	sp|Q9UKN8|TF3C4_HUMAN	8	4	-12.0053	0.000290319	0.732168	0.374293	0.00169082	0.968005	2.7719	['Q9UKN8']	GTF3C4
1527	sp|P61086|UBE2K_HUMAN	6	3	1.92835	0.000293448	0.832542	1.18019	0.0017048	-0.503429	2.76833	['P61086']	UBE2K
2456	sp|Q6PKG0|LARP1_HUMAN	19	5	-15.6658	0.000293543	0.432518	0.685004	0.0017048	-0.663351	2.76833	['Q6PKG0']	LARP1
1890	sp|Q13045|FLII_HUMAN	16	8	-3.25062	0.000293944	0.44161	0.689377	0.0017048	-0.64252	2.76833	['Q13045']	FLII
2155	sp|Q15631|TSN_HUMAN	9	8	-13.6314	0.000296458	0.619913	1.06841	0.00171699	-0.785328	2.76523	['Q15631']	TSN
2790	sp|Q8TAE8|G45IP_HUMAN	5	3	1.20139	0.000301525	1.10527	0.90037	0.00174391	0.295814	2.75848	['Q8TAE8']	GADD45GIP1
406	sp|O76021|RL1D1_HUMAN	16	8	8.24627	0.000304388	1.02124	0.979954	0.00175803	0.0595369	2.75497	['O76021']	RSL1D1
223	sp|O43684|BUB3_HUMAN	9	6	-0.123295	0.000305697	0.530345	1.10689	0.00176315	-1.06151	2.75371	['O43684']	BUB3
4149	sp|Q9Y6E2|BZW2_HUMAN	14	8	-3.10802	0.000306535	0.401612	0.763174	0.00176554	-0.926207	2.75312	['Q9Y6E2']	BZW2
1027	sp|P29317|EPHA2_HUMAN	13	8	-7.58601	0.000310922	0.677271	0.488236	0.00178834	0.472153	2.74755	['P29317']	EPHA2
3214	sp|Q99714|HCD2_HUMAN	12	5	-1.77353	0.000325419	1.13749	0.393476	0.00186914	1.53151	2.72836	['Q99714']	HSD17B10
1167	sp|P38159|RBMX_HUMAN	18	9	10.1397	0.000327653	1.09094	0.916836	0.00187939	0.250841	2.72598	['P38159']	RBMX
1524	sp|P61026|RAB10_HUMAN	10	5	-5.24587	0.000328932	0.564598	1.07316	0.00188413	-0.926573	2.72489	['P61026']	RAB10
228	sp|O43747|AP1G1_HUMAN	5	2	-10.1741	0.000329715	0.838807	1.21742	0.00188603	-0.537411	2.72445	['O43747']	AP1G1
60	sp|O00425|IF2B3_HUMAN	15	8	-15.3181	0.000330952	0.317677	0.553573	0.0018905	-0.801212	2.72342	['O00425']	IGF2BP3
2050	sp|Q14677|EPN4_HUMAN	10	5	-14.9419	0.00033552	0.966602	1.03567	0.00191398	-0.0995758	2.71806	['Q14677']	CLINT1
2799	sp|Q8TC12|RDH11_HUMAN	5	3	-2.8485	0.000343709	1.0385	0.598534	0.0019575	0.794991	2.7083	['Q8TC12']	RDH11
336	sp|O75367|H2AY_HUMAN	15	9	-0.973549	0.000344088	0.942367	1.05736	0.0019575	-0.166102	2.7083	['O75367']	H2AFY
1534	sp|P61204|ARF3_HUMAN;sp|P84077|ARF1_HUMAN	8	5	-1.34963	0.000347107	0.857799	1.15612	0.00197198	-0.430584	2.7051	['P61204', 'P84077']	ARF3
2025	sp|Q14247|SRC8_HUMAN	25	8	-6.13734	0.000350296	0.220293	1.06036	0.0019874	-2.26706	2.70172	['Q14247']	CTTN
3607	sp|Q9NR30|DDX21_HUMAN	35	14	2.00819	0.00035949	1.1046	0.902747	0.00203679	0.291137	2.69105	['Q9NR30']	DDX21
596	sp|P05556|ITB1_HUMAN	22	12	3.89571	0.000374439	1.15626	0.863363	0.0021186	0.421422	2.67395	['P05556']	ITGB1
2574	sp|Q86UP2|KTN1_HUMAN	69	28	0.739286	0.000381744	1.06572	0.936607	0.00215671	0.186308	2.66621	['Q86UP2']	KTN1
1757	sp|Q02127|PYRD_HUMAN	5	4	#NAME?	0.000382208	0.612098	0.533321	0.00215671	0.198759	2.66621	['Q02127']	DHODH
1920	sp|Q13325|IFIT5_HUMAN	7	6	#NAME?	0.00039395	0.594012	0.340665	0.00221996	0.802138	2.65365	['Q13325']	IFIT5
932	sp|P22234|PUR6_HUMAN	15	8	2.98498	0.000396028	0.85814	1.13977	0.00222645	-0.40946	2.65239	['P22234']	PAICS
182	sp|O43148|MCES_HUMAN	6	4	-6.59393	0.000396472	0.62144	1.0859	0.00222645	-0.805208	2.65239	['O43148']	RNMT
1074	sp|P31153|METK2_HUMAN	12	5	-10.0177	0.000396702	0.463439	1.19774	0.00222645	-1.36987	2.65239	['P31153']	MAT2A
948	sp|P23284|PPIB_HUMAN	14	6	1.32634	0.000397465	1.0968	0.909977	0.00222773	0.269398	2.65214	['P23284']	PPIB
379	sp|O75718|CRTAP_HUMAN	9	4	2.597	0.000399145	1.13801	0.573891	0.00223414	0.987665	2.65089	['O75718']	CRTAP
1858	sp|Q12797|ASPH_HUMAN	14	4	9.02673	0.000400185	1.11143	0.887899	0.00223696	0.323948	2.65034	['Q12797']	ASPH
4094	sp|Q9Y508|RN114_HUMAN	2	2	#NAME?	0.000401357	1.06777	0.521426	0.00224051	1.03406	2.64965	['Q9Y508']	RNF114
632	sp|P07686|HEXB_HUMAN	10	5	-1.76379	0.000403957	1.11743	0.615283	0.00225201	0.860857	2.64743	['P07686']	HEXB
2120	sp|Q15269|PWP2_HUMAN	14	7	-8.02082	0.000408606	1.0848	0.367335	0.00227488	1.56227	2.64304	['Q15269']	PWP2
2355	sp|Q5TFE4|NT5D1_HUMAN	5	2	#NAME?	0.000410847	0.089118	0.486678	0.00228373	-2.44918	2.64136	['Q5TFE4']	NT5DC1
243	sp|O43837|IDH3B_HUMAN	15	11	-137.902	0.00041129	0.458946	1.07447	0.00228373	-1.22722	2.64136	['O43837']	IDH3B
784	sp|P13674|P4HA1_HUMAN	16	9	-19.7122	0.000415047	1.0169	0.519495	0.00230152	0.968994	2.63798	['P13674']	P4HA1
2200	sp|Q16629|SRSF7_HUMAN	8	3	-86.0802	0.000427661	0.802262	1.22009	0.00236832	-0.604843	2.62556	['Q16629']	SRSF7
3086	sp|Q96HY6|DDRGK_HUMAN	5	4	-6.20041	0.000432016	1.14219	0.39952	0.00238927	1.51546	2.62174	['Q96HY6']	DDRGK1
3669	sp|Q9NVI7|ATD3A_HUMAN	20	9	-8.28794	0.000435927	0.939204	1.07038	0.0024077	-0.18861	2.6184	['Q9NVI7']	ATAD3A
1625	sp|P62995|TRA2B_HUMAN	8	4	-28.8053	0.000437958	0.394128	0.989001	0.00241572	-1.32731	2.61695	['P62995']	TRA2B
4169	sp|Q9Y6Y8|S23IP_HUMAN	11	5	-3.90819	0.000442084	0.56637	0.822179	0.00243526	-0.537707	2.61346	['Q9Y6Y8']	SEC23IP
2421	sp|Q6NUK1|SCMC1_HUMAN	17	8	-3.02819	0.000445292	1.1081	0.520922	0.00244969	1.08895	2.61089	['Q6NUK1']	SLC25A24
3572	sp|Q9NPD8|UBE2T_HUMAN	6	5	-9.87173	0.000447069	0.622306	0.997958	0.00245529	-0.681356	2.6099	['Q9NPD8']	UBE2T
3974	sp|Q9UQ80|PA2G4_HUMAN	17	3	9.9748	0.000447486	0.804265	1.21032	0.00245529	-0.589646	2.6099	['Q9UQ80']	PA2G4
3708	sp|Q9NY12|GAR1_HUMAN	5	3	0.746285	0.000450164	0.597135	0.882229	0.00246673	-0.563095	2.60788	['Q9NY12']	GAR1
2960	sp|Q969H8|CS010_HUMAN	6	4	-2.98348	0.000451105	1.16437	0.549142	0.00246865	1.0843	2.60754	['Q969H8']	C19orf10
3950	sp|Q9UNN5|FAF1_HUMAN	5	3	-9.74712	0.000452359	0.299444	0.673551	0.00247226	-1.1695	2.60691	['Q9UNN5']	FAF1
3749	sp|Q9P015|RM15_HUMAN	8	3	-113.67	0.000457633	0.893843	1.13409	0.00249782	-0.343445	2.60244	['Q9P015']	MRPL15
2596	sp|Q86Y56|HEAT2_HUMAN	7	5	-4.41066	0.000471425	0.408321	0.653448	0.00256973	-0.67837	2.59011	['Q86Y56']	HEATR2
3191	sp|Q99519|NEUR1_HUMAN	4	2	-4.5568	0.000474626	1.14777	0.871009	0.0025838	0.398071	2.58774	['Q99519']	NEU1
911	sp|P20810|ICAL_HUMAN	13	7	#NAME?	0.000475633	0.266149	0.445588	0.00258591	-0.743474	2.58739	['P20810']	CAST
2262	sp|Q3ZCQ8|TIM50_HUMAN	10	4	-2.33269	0.000477406	1.1003	0.566193	0.00259216	0.958536	2.58634	['Q3ZCQ8']	TIMM50
1212	sp|P42285|SK2L2_HUMAN	20	12	-4.70416	0.000483945	1.08499	0.914081	0.00262426	0.247285	2.58099	['P42285']	SKIV2L2
1309	sp|P49418|AMPH_HUMAN	6	3	-134.522	0.000485628	0.80436	1.18214	0.00262996	-0.55549	2.58005	['P49418']	AMPH
4024	sp|Q9Y2T7|YBOX2_HUMAN	4	2	-9.57751	0.000489378	0.716496	1.32781	0.0026457	-0.890021	2.57746	['Q9Y2T7']	YBX2
1814	sp|Q07021|C1QBP_HUMAN	7	4	-5.80367	0.000489803	1.22751	0.805965	0.0026457	0.606951	2.57746	['Q07021']	C1QBP
3137	sp|Q96Q11|TRNT1_HUMAN	5	3	#NAME?	0.000497051	0.456312	0.479873	0.00267387	-0.0726337	2.57286	['Q96Q11']	TRNT1
3759	sp|Q9P0M6|H2AW_HUMAN	6	3	-0.646948	0.000497515	0.891094	1.10806	0.00267387	-0.314391	2.57286	['Q9P0M6']	H2AFY2
677	sp|P09104|ENOG_HUMAN	5	2	9.16619	0.000497583	0.851513	1.17438	0.00267387	-0.4638	2.57286	['P09104']	ENO2
790	sp|P13929|ENOB_HUMAN	3	2	8.87257	0.000497583	0.852009	1.1737	0.00267387	-0.462119	2.57286	['P13929']	ENO3
3981	sp|Q9Y221|NIP7_HUMAN	5	3	-0.683153	0.000504485	1.33822	0.738594	0.00270747	0.857458	2.56744	['Q9Y221']	NIP7
662	sp|P08572|CO4A2_HUMAN	4	2	-3.95781	0.00050804	0.610156	0.290338	0.00272304	1.07144	2.56495	['P08572']	COL4A2
3181	sp|Q99436|PSB7_HUMAN	5	3	-0.370565	0.000527667	0.854262	0.671745	0.00282441	0.346766	2.54907	['Q99436']	PSMB7
1635	sp|P63165|SUMO1_HUMAN	3	2	6.05748	0.000528307	0.676253	1.38956	0.00282441	-1.03899	2.54907	['P63165']	SUMO1
2103	sp|Q15061|WDR43_HUMAN	12	7	-4.82523	0.000533533	1.02526	0.974172	0.0028487	0.0737421	2.54535	['Q15061']	WDR43
967	sp|P24844|MYL9_HUMAN	8	4	-0.962106	0.000548515	0.861173	1.16121	0.00292495	-0.431249	2.53388	['P24844']	MYL9
3360	sp|Q9BYD6|RM01_HUMAN	7	4	-8.30331	0.000550261	1.11084	0.899817	0.00293051	0.303942	2.53306	['Q9BYD6']	MRPL1
657	sp|P08240|SRPR_HUMAN	15	6	-4.79931	0.000560454	1.13677	0.885212	0.00298099	0.36084	2.52564	['P08240']	SRPR
1897	sp|Q13123|RED_HUMAN	17	7	-9.64017	0.000561204	0.329213	0.259074	0.00298117	0.345661	2.52561	['Q13123']	IK
135	sp|O15061|SYNEM_HUMAN	7	4	-9.14713	0.000566601	0.750058	0.365952	0.00300601	1.03535	2.52201	['O15061']	SYNM
2119	sp|Q15233|NONO_HUMAN	23	10	-9.2127	0.000572352	1.14374	0.865663	0.00303266	0.401885	2.51818	['Q15233']	NONO
3539	sp|Q9HC07|TM165_HUMAN	5	2	3.91615	0.000577434	1.188	0.461471	0.00305571	1.36422	2.51489	['Q9HC07']	TMEM165
1685	sp|P80217|IN35_HUMAN	3	2	#NAME?	0.00057888	0.573459	0.290629	0.00305948	0.980512	2.51435	['P80217']	IFI35
994	sp|P26639|SYTC_HUMAN	27	11	-2.34818	0.000582028	0.376798	1.08701	0.00307222	-1.5285	2.51255	['P26639']	TARS
1335	sp|P49790|NU153_HUMAN	35	12	-0.640598	0.00059219	1.08155	0.924551	0.00312191	0.226273	2.50558	['P49790']	NUP153
1936	sp|Q13435|SF3B2_HUMAN	34	11	-0.193225	0.00059819	1.11904	0.888605	0.00314956	0.332648	2.50175	['Q13435']	SF3B2
1692	sp|P82664|RT10_HUMAN	3	2	#NAME?	0.000616518	1.01582	0.504956	0.00324072	1.00842	2.48936	['P82664']	MRPS10
733	sp|P11177|ODPB_HUMAN	12	5	-4.68326	0.000617578	1.06354	0.543998	0.00324072	0.967199	2.48936	['P11177']	PDHB
861	sp|P17931|LEG3_HUMAN	7	5	0.427239	0.000617834	0.756709	0.502354	0.00324072	0.591033	2.48936	['P17931']	LGALS3
146	sp|O15173|PGRC2_HUMAN	9	7	-9.67157	0.000620384	1.05155	0.451155	0.00325	1.22082	2.48812	['O15173']	PGRMC2
1671	sp|P78347|GTF2I_HUMAN	37	12	-3.48609	0.000623863	0.994208	0.484769	0.00326413	1.03625	2.48623	['P78347']	GTF2I
1802	sp|Q05D32|CTSL2_HUMAN	8	3	-7.18349	0.000634928	1.09538	0.556637	0.00331786	0.976624	2.47914	['Q05D32']	CTDSPL2
3701	sp|Q9NX63|CHCH3_HUMAN	10	4	8.50658	0.000637299	1.10188	0.908031	0.00332608	0.279152	2.47807	['Q9NX63']	CHCHD3
3112	sp|Q96KR1|ZFR_HUMAN	23	9	-2.99939	0.000640571	0.647079	0.405343	0.00333898	0.674798	2.47639	['Q96KR1']	ZFR
825	sp|P15924|DESP_HUMAN	2	2	#NAME?	0.000649804	0.511475	0.460255	0.00338287	0.152231	2.47071	['P15924']	DSP
127	sp|O14979|HNRDL_HUMAN	14	5	7.03652	0.000654178	1.25479	0.795877	0.00340023	0.656823	2.46849	['O14979']	HNRNPDL
675	sp|P09001|RM03_HUMAN	2	2	-39.4459	0.000654769	0.480904	1.12356	0.00340023	-1.22425	2.46849	['P09001']	MRPL3
291	sp|O60812|HNRCL_HUMAN	8	3	-0.0983057	0.000663462	1.17793	0.848947	0.00344109	0.472508	2.4633	['O60812']	HNRNPCL1
702	sp|P0C0S5|H2AZ_HUMAN;sp|Q71UI9|H2AV_HUMAN	4	2	-15.7012	0.000672857	0.710952	1.40657	0.00348548	-0.984353	2.45774	['P0C0S5', 'Q71UI9']	H2AFZ
604	sp|P06454|PTMA_HUMAN	5	3	-7.49674	0.000674558	0.835608	1.19701	0.00348996	-0.518541	2.45718	['P06454']	PTMA
114	sp|O14828|SCAM3_HUMAN	3	3	-76.185	0.000679277	0.968946	0.398072	0.00351002	1.28339	2.45469	['O14828']	SCAMP3
3919	sp|Q9ULD0|OGDHL_HUMAN	5	2	-9.7156	0.00068457	1.10664	0.58437	0.00353299	0.921226	2.45186	['Q9ULD0']	OGDHL
2237	sp|Q2NL82|TSR1_HUMAN	12	3	-137.091	0.000700771	0.07731	0.352678	0.00361213	-2.18962	2.44224	['Q2NL82']	TSR1
213	sp|O43615|TIM44_HUMAN	19	6	-2.97821	0.00071241	1.1432	0.881907	0.00366759	0.374375	2.43562	['O43615']	TIMM44
1460	sp|P55036|PSMD4_HUMAN	11	6	1.45571	0.000715711	0.914513	1.09276	0.00368004	-0.256905	2.43415	['P55036']	PSMD4
41	sp|O00217|NDUS8_HUMAN	4	2	4.60878	0.000725048	1.11928	0.256876	0.00372346	2.12343	2.42905	['O00217']	NDUFS8
1269	sp|P47755|CAZA2_HUMAN	11	6	-4.68991	0.000727486	0.803346	1.24143	0.00373139	-0.627907	2.42813	['P47755']	CAPZA2
3571	sp|Q9NPD3|EXOS4_HUMAN	5	3	-4.2097	0.000731296	1.04786	0.715585	0.00374632	0.550255	2.4264	['Q9NPD3']	EXOSC4
3552	sp|Q9HCS7|SYF1_HUMAN	10	6	-4.32071	0.000733197	0.685214	0.39933	0.00375145	0.778974	2.4258	['Q9HCS7']	XAB2
1272	sp|P47897|SYQ_HUMAN	27	10	-11.1019	0.000738513	0.928914	0.493984	0.00377245	0.911081	2.42338	['P47897']	QARS
1931	sp|Q13418|ILK_HUMAN	10	7	-3.4228	0.000739225	0.455355	0.414344	0.00377245	0.136163	2.42338	['Q13418']	ILK
573	sp|P04818|TYSY_HUMAN	8	4	-11.6502	0.000740166	0.351435	0.591249	0.00377245	-0.750505	2.42338	['P04818']	TYMS
381	sp|O75787|RENR_HUMAN	2	2	-5.39226	0.00074092	0.515448	1.09102	0.00377245	-1.08179	2.42338	['O75787']	ATP6AP2
2373	sp|Q5VYK3|ECM29_HUMAN	15	10	-7.67468	0.000743356	0.0886441	0.310013	0.00378024	-1.80623	2.42248	['Q5VYK3']	ECM29
1486	sp|P56270|MAZ_HUMAN	2	2	#NAME?	0.000746508	0.630336	0.269612	0.00379164	1.22524	2.42117	['P56270']	MAZ
1199	sp|P41223|BUD31_HUMAN	3	3	-11.4959	0.000748398	0.574253	0.316202	0.00379662	0.860837	2.4206	['P41223']	BUD31
3739	sp|Q9NZM5|GSCR2_HUMAN	10	5	-74.6022	0.000756277	0.433187	0.16252	0.00383193	1.41438	2.41658	['Q9NZM5']	GLTSCR2
3233	sp|Q99961|SH3G1_HUMAN	5	3	#NAME?	0.000774364	0.32519	0.352032	0.00391881	-0.114421	2.40685	['Q99961']	SH3GL1
1742	sp|Q01518|CAP1_HUMAN	13	8	-0.470562	0.00077628	0.90501	1.11099	0.00392374	-0.295834	2.4063	['Q01518']	CAP1
1589	sp|P62318|SMD3_HUMAN	4	2	#NAME?	0.000789819	1.31051	0.773448	0.00398734	0.760756	2.39932	['P62318']	SNRPD3
4083	sp|Q9Y4G6|TLN2_HUMAN	15	5	-5.79401	0.000791904	0.921125	1.07831	0.00398743	-0.227306	2.39931	['Q9Y4G6']	TLN2
852	sp|P17612|KAPCA_HUMAN	8	5	#NAME?	0.000792358	0.446649	0.58252	0.00398743	-0.383165	2.39931	['P17612']	PRKACA
1219	sp|P42704|LPPRC_HUMAN	66	20	-0.743155	0.000792704	1.10092	0.913151	0.00398743	0.269785	2.39931	['P42704']	LRPPRC
1477	sp|P55795|HNRH2_HUMAN	19	8	-17.4994	0.000807491	0.320734	1.16588	0.00405691	-1.86197	2.3918	['P55795']	HNRNPH2
354	sp|O75489|NDUS3_HUMAN	10	4	-10.5957	0.000813163	1.10449	0.894878	0.00408049	0.303623	2.38929	['O75489']	NDUFS3
1872	sp|Q12906|ILF3_HUMAN	36	14	0.358719	0.000814633	1.0813	0.925187	0.00408296	0.224944	2.38903	['Q12906']	ILF3
1433	sp|P53675|CLH2_HUMAN	13	6	-5.85269	0.000819933	0.362087	1.18156	0.00410459	-1.70629	2.38673	['P53675']	CLTCL1
2132	sp|Q15369|ELOC_HUMAN	5	3	-6.97088	0.000823613	0.731249	1.34107	0.00411806	-0.874947	2.38531	['Q15369']	TCEB1
1870	sp|Q12904|AIMP1_HUMAN	12	6	-6.92458	0.000830041	0.962495	1.0383	0.00414523	-0.109366	2.38245	['Q12904']	AIMP1
1128	sp|P35520|CBS_HUMAN	6	3	2.99452	0.000838762	0.322248	1.0483	0.00418378	-1.7018	2.37843	['P35520']	CBS
695	sp|P09669|COX6C_HUMAN	6	2	-5.97139	0.000846628	0.830041	1.20476	0.00421797	-0.537492	2.3749	['P09669']	COX6C
3259	sp|Q9BRJ6|CG050_HUMAN	6	4	-1.68264	0.000858254	1.08307	0.925754	0.00427022	0.226427	2.36955	['Q9BRJ6']	C7orf50
3125	sp|Q96N67|DOCK7_HUMAN	4	3	#NAME?	0.000859165	0.130608	0.126968	0.00427022	0.0407842	2.36955	['Q96N67']	DOCK7
3939	sp|Q9UMY1|NOL7_HUMAN	6	2	#NAME?	0.000862121	1.07414	0.552972	0.00427982	0.957904	2.36857	['Q9UMY1']	NOL7
1613	sp|P62879|GBB2_HUMAN	8	5	-0.964974	0.000874794	1.11109	0.90159	0.00433756	0.301429	2.36275	['P62879']	GNB2
893	sp|P19784|CSK22_HUMAN	11	6	-5.81362	0.00088749	0.868145	1.14288	0.00439529	-0.396667	2.35701	['P19784']	CSNK2A2
818	sp|P15374|UCHL3_HUMAN	5	3	-6.40285	0.000895908	0.30077	1.09515	0.00443172	-1.86439	2.35343	['P15374']	UCHL3
1276	sp|P48059|LIMS1_HUMAN	3	2	#NAME?	0.000899534	0.371805	0.640681	0.00444438	-0.785061	2.35219	['P48059']	LIMS1
1997	sp|Q14011|CIRBP_HUMAN	4	3	-5.63161	0.000913848	1.10519	0.57754	0.00450976	0.936305	2.34585	['Q14011']	CIRBP
1902	sp|Q13153|PAK1_HUMAN	2	2	#NAME?	0.000916272	0.471401	1.18806	0.00451123	-1.33358	2.34571	['Q13153']	PAK1
1043	sp|P30049|ATPD_HUMAN	2	2	9.55127	0.000917051	1.06605	0.934892	0.00451123	0.189401	2.34571	['P30049']	ATP5D
1945	sp|Q13492|PICAL_HUMAN	10	4	#NAME?	0.000917392	0.293001	0.560712	0.00451123	-0.936354	2.34571	['Q13492']	PICALM
2100	sp|Q15056|IF4H_HUMAN	9	5	-1.89063	0.000929263	0.503279	0.657216	0.00456423	-0.385009	2.34063	['Q15056']	EIF4H
1933	sp|Q13425|SNTB2_HUMAN	3	3	1.48912	0.000944532	0.767656	0.737616	0.00463376	0.0575886	2.33407	['Q13425']	SNTB2
2719	sp|Q8N9T8|KRI1_HUMAN	9	5	-1.14007	0.000967045	1.17289	0.850015	0.00473864	0.464501	2.32435	['Q8N9T8']	KRI1
3620	sp|Q9NRN7|ADPPT_HUMAN	4	4	-2.22929	0.000969468	0.740312	1.32917	0.00474493	-0.844326	2.32377	['Q9NRN7']	AASDHPPT
1380	sp|P51572|BAP31_HUMAN	10	6	-5.68476	0.000978334	1.07845	0.418676	0.00478271	1.36505	2.32033	['P51572']	BCAP31
1218	sp|P42696|RBM34_HUMAN	10	5	-1.97014	0.000988565	0.557849	1.05228	0.00482707	-0.915575	2.31632	['P42696']	RBM34
2106	sp|Q15075|EEA1_HUMAN	37	23	-14.6195	0.000998278	0.383598	0.445759	0.00486767	-0.216671	2.31268	['Q15075']	EEA1
558	sp|P04040|CATA_HUMAN	16	8	-19.6003	0.00099953	0.414119	1.02965	0.00486767	-1.31403	2.31268	['P04040']	CAT
1680	sp|P78417|GSTO1_HUMAN	8	5	-2.40543	0.00100062	0.870219	1.14279	0.00486767	-0.393113	2.31268	['P78417']	GSTO1
1587	sp|P62314|SMD1_HUMAN	4	3	-10.1202	0.00100247	0.730162	1.32546	0.00486767	-0.860206	2.31268	['P62314']	SNRPD1
1497	sp|P57740|NU107_HUMAN	18	8	-0.492896	0.00100272	0.663348	0.624328	0.00486767	0.0874621	2.31268	['P57740']	NUP107
4163	sp|Q9Y6N1|COX11_HUMAN	2	2	-5.69958	0.00104104	1.04634	0.446976	0.00504781	1.22708	2.2969	['Q9Y6N1']	COX11
3159	sp|Q96S97|MYADM_HUMAN	4	2	-4.5447	0.00105226	1.13228	0.586172	0.0050963	0.949828	2.29275	['Q96S97']	MYADM
122	sp|O14950|ML12B_HUMAN;sp|P19105|ML12A_HUMAN	9	6	1.38649	0.00109796	0.906839	1.10273	0.00531148	-0.282162	2.27478	['O14950', 'P19105']	MYL12B
1643	sp|P63244|GBLP_HUMAN	18	10	-3.38793	0.00110539	0.411604	1.09441	0.00534124	-1.41083	2.27236	['P63244']	GNB2L1
2784	sp|Q8NI22|MCFD2_HUMAN	4	2	-4.89732	0.00113356	1.41173	0.734271	0.00547098	0.943081	2.26193	['Q8NI22']	MCFD2
1971	sp|Q13630|FCL_HUMAN	2	2	-6.82333	0.00113527	0.617657	1.13699	0.00547291	-0.88034	2.26178	['Q13630']	TSTA3
3251	sp|Q9BQP7|MGME1_HUMAN	5	4	-8.67109	0.00113907	1.07244	0.632556	0.00548492	0.761631	2.26083	['Q9BQP7']	MGME1
109	sp|O14776|TCRG1_HUMAN	17	7	-8.80273	0.00114753	0.512914	0.633672	0.00551928	-0.30502	2.25812	['O14776']	TCERG1
445	sp|O95168|NDUB4_HUMAN	3	2	-0.599434	0.00115688	1.11507	0.508665	0.00555783	1.13235	2.25509	['O95168']	NDUFB4
2942	sp|Q92945|FUBP2_HUMAN	26	8	-16.4242	0.00117736	0.920063	1.08695	0.00564971	-0.240483	2.24797	['Q92945']	KHSRP
1111	sp|P35052|GPC1_HUMAN	11	7	-4.31259	0.00118004	0.902949	0.54007	0.00565605	0.741497	2.24749	['P35052']	GPC1
3527	sp|Q9HAV0|GBB4_HUMAN	6	4	#NAME?	0.00119273	1.0774	0.407481	0.0057054	1.40274	2.24371	['Q9HAV0']	GNB4
1822	sp|Q07955|SRSF1_HUMAN	15	5	9.97091	0.00119307	1.07261	0.931926	0.0057054	0.202842	2.24371	['Q07955']	SRSF1
502	sp|O95786|DDX58_HUMAN	12	4	2.88038	0.00119823	0.646834	0.352378	0.0057235	0.876271	2.24234	['O95786']	DDX58
1265	sp|P46939|UTRO_HUMAN	54	29	-20.2116	0.00120142	0.34152	0.400627	0.00573218	-0.23029	2.24168	['P46939']	UTRN
550	sp|P02675|FIBB_HUMAN	3	2	-5.11435	0.00120602	0.424679	0.180352	0.00574754	1.23556	2.24052	['P02675']	FGB
2858	sp|Q8WWC4|CB047_HUMAN	4	3	#NAME?	0.00120943	0.622966	0.37767	0.0057572	0.722026	2.23979	['Q8WWC4']	C2orf47
3533	sp|Q9HB71|CYBP_HUMAN	11	7	1.5259	0.00121391	0.800665	1.22926	0.00577194	-0.618517	2.23868	['Q9HB71']	CACYBP
542	sp|P01893|HLAH_HUMAN	3	2	-69.4029	0.0012182	1.24173	0.0469054	0.00578455	4.72645	2.23773	['P01893']	HLA-H
3999	sp|Q9Y2B0|CNPY2_HUMAN	10	5	-0.741291	0.00121933	1.16403	0.851052	0.00578455	0.45181	2.23773	['Q9Y2B0']	CNPY2
4025	sp|Q9Y2U8|MAN1_HUMAN	8	6	-7.70554	0.00122471	0.432171	0.270466	0.00580345	0.676157	2.23631	['Q9Y2U8']	LEMD3
3699	sp|Q9NX58|LYAR_HUMAN	14	7	-2.673	0.00123643	1.115	0.902006	0.00585235	0.305833	2.23267	['Q9NX58']	LYAR
1687	sp|P80723|BASP1_HUMAN	15	5	2.22335	0.00124634	1.19222	0.831616	0.00589257	0.51966	2.22969	['P80723']	BASP1
1958	sp|Q13573|SNW1_HUMAN	19	11	#NAME?	0.00124831	0.321234	0.253863	0.0058952	0.339579	2.2295	['Q13573']	SNW1
61	sp|O00429|DNM1L_HUMAN	13	7	#NAME?	0.00127046	0.396033	0.54939	0.00599299	-0.47221	2.22236	['O00429']	DNM1L
895	sp|P20042|IF2B_HUMAN	18	11	#NAME?	0.00127477	0.388969	0.416492	0.00600655	-0.0986329	2.22137	['P20042']	EIF2S2
2774	sp|Q8NFH4|NUP37_HUMAN	3	2	#NAME?	0.0013184	0.561979	0.315821	0.00619947	0.831411	2.20765	['Q8NFH4']	NUP37
3088	sp|Q96I24|FUBP3_HUMAN	19	10	-13.334	0.00131869	0.964343	1.04028	0.00619947	-0.109359	2.20765	['Q96I24']	FUBP3
1156	sp|P36873|PP1G_HUMAN	12	5	-3.70755	0.00132388	0.993162	1.00613	0.00621686	-0.0187087	2.20643	['P36873']	PPP1CC
2293	sp|Q562R1|ACTBL_HUMAN	11	5	-6.84505	0.00133778	0.94131	1.06235	0.0062751	-0.174517	2.20238	['Q562R1']	ACTBL2
2820	sp|Q8TED1|GPX8_HUMAN	7	4	0.382702	0.00136373	1.04542	0.597673	0.00638961	0.806654	2.19453	['Q8TED1']	GPX8
1356	sp|P50579|MAP2_HUMAN	11	4	-11.4171	0.0013665	0.401225	1.15898	0.00639542	-1.53037	2.19413	['P50579']	METAP2
2263	sp|Q460N5|PAR14_HUMAN	8	4	-13.1235	0.00136816	0.444527	0.214023	0.00639601	1.05451	2.19409	['Q460N5']	PARP14
3957	sp|Q9UNZ2|NSF1C_HUMAN	12	8	2.56326	0.00139725	0.937206	1.06901	0.00652467	-0.189837	2.18544	['Q9UNZ2']	NSFL1C
361	sp|O75531|BAF_HUMAN	5	3	2.5148	0.00140213	1.1024	0.907294	0.00654014	0.281001	2.18441	['O75531']	BANF1
564	sp|P04179|SODM_HUMAN	5	3	1.78562	0.00141253	1.07414	0.390321	0.00658128	1.46045	2.18169	['P04179']	SOD2
1987	sp|Q13884|SNTB1_HUMAN	2	2	-2.3283	0.00142402	0.998765	0.528305	0.00662743	0.918775	2.17865	['Q13884']	SNTB1
3000	sp|Q96BR5|COA7_HUMAN	3	2	-14.9892	0.00143198	1.05824	0.550431	0.00665246	0.943029	2.17702	['Q96BR5']	COA7
1774	sp|Q02978|M2OM_HUMAN	11	7	-0.0890801	0.00143259	1.1197	0.889399	0.00665246	0.332203	2.17702	['Q02978']	SLC25A11
516	sp|O96005|CLPT1_HUMAN	11	5	-10.762	0.00144453	1.11465	0.398512	0.00670042	1.4839	2.1739	['O96005']	CLPTM1
1982	sp|Q13813|SPTN1_HUMAN	119	37	1.26719	0.00145968	0.95611	1.04255	0.0067632	-0.124867	2.16985	['Q13813']	SPTAN1
1619	sp|P62917|RL8_HUMAN	8	4	-0.485404	0.0014786	0.814615	1.22045	0.00684326	-0.583222	2.16474	['P62917']	RPL8
3516	sp|Q9H9J2|RM44_HUMAN	4	4	-7.95424	0.00148923	1.06864	0.623919	0.00688478	0.776341	2.16211	['Q9H9J2']	MRPL44
3905	sp|Q9UKV3|ACINU_HUMAN	25	12	2.71736	0.0015023	1.09127	0.913237	0.00693755	0.256941	2.15879	['Q9UKV3']	ACIN1
46	sp|O00255|MEN1_HUMAN	8	3	-47.4972	0.00150458	0.340134	0.344178	0.00694039	-0.0170513	2.15862	['O00255']	MEN1
1904	sp|Q13162|PRDX4_HUMAN	11	5	5.8539	0.00151667	1.15037	0.838932	0.00698839	0.455477	2.15562	['Q13162']	PRDX4
1865	sp|Q12872|SFSWA_HUMAN	3	2	1.27991	0.00151945	0.630024	0.329241	0.00699348	0.936261	2.15531	['Q12872']	SFSWAP
73	sp|O00541|PESC_HUMAN	14	8	#NAME?	0.00153654	0.407696	0.310854	0.00706435	0.391256	2.15093	['O00541']	PES1
848	sp|P17480|UBF1_HUMAN	15	5	-14.277	0.00153945	1.14811	0.858803	0.00706582	0.418859	2.15084	['P17480']	UBTF
2950	sp|Q93009|UBP7_HUMAN	21	7	-10.5519	0.00154025	0.115064	0.253507	0.00706582	-1.13958	2.15084	['Q93009']	USP7
3556	sp|Q9HD33|RM47_HUMAN	4	3	#NAME?	0.00155993	1.00041	0.999544	0.00714823	0.00125236	2.1458	['Q9HD33']	MRPL47
929	sp|P22061|PIMT_HUMAN	7	7	4.90519	0.0015639	0.509954	0.678782	0.00715859	-0.41258	2.14517	['P22061']	PCMT1
2304	sp|Q5EB52|MEST_HUMAN	2	2	-8.37137	0.00156826	0.648265	1.09376	0.00716919	-0.754642	2.14453	['Q5EB52']	MEST
708	sp|P0CG38|POTEI_HUMAN	7	3	-3.14257	0.00156966	0.572516	1.6808	0.00716919	-1.55376	2.14453	['P0CG38']	POTEI
2015	sp|Q14192|FHL2_HUMAN	6	3	-4.58689	0.00158655	0.406127	0.730847	0.00723841	-0.847638	2.14036	['Q14192']	FHL2
1763	sp|Q02447|SP3_HUMAN	2	2	-2.44035	0.00164012	1.17812	0.409511	0.00747467	1.52451	2.12641	['Q02447']	SP3
3767	sp|Q9P246|STIM2_HUMAN	2	2	#NAME?	0.00164344	0.533409	0.232339	0.00748159	1.19901	2.12601	['Q9P246']	STIM2
2318	sp|Q5JTJ3|COA6_HUMAN	3	3	0.197996	0.00164819	1.17825	0.390172	0.00749503	1.59447	2.12523	['Q5JTJ3']	COA6
1104	sp|P33992|MCM5_HUMAN	20	10	-1.30046	0.00168535	0.412143	1.05544	0.00765569	-1.35663	2.11602	['P33992']	MCM5
663	sp|P08574|CY1_HUMAN	8	4	-0.134592	0.001712	1.18424	0.451682	0.00776827	1.39058	2.10968	['P08574']	CYC1
233	sp|O43768|ENSA_HUMAN	5	3	-5.09565	0.00173275	0.885084	0.49622	0.00785386	0.834833	2.10492	['O43768']	ENSA
1273	sp|P47914|RL29_HUMAN	2	2	#NAME?	0.00175012	1.01712	0.984213	0.00792397	0.047445	2.10106	['P47914']	RPL29
64	sp|O00461|GOLI4_HUMAN	17	8	-57.225	0.00182714	0.42204	0.383939	0.00826375	0.136502	2.08282	['O00461']	GOLIM4
3185	sp|Q99459|CDC5L_HUMAN	30	10	-153.525	0.00183357	1.13498	0.868892	0.00828385	0.385419	2.08177	['Q99459']	CDC5L
678	sp|P09110|THIK_HUMAN	4	2	-9.61604	0.00184061	1.14961	0.862819	0.00830665	0.414017	2.08057	['P09110']	ACAA1
3325	sp|Q9BW92|SYTM_HUMAN	13	6	-0.809302	0.00184664	0.596632	0.339994	0.00832487	0.811334	2.07962	['Q9BW92']	TARS2
3544	sp|Q9HCC0|MCCB_HUMAN	8	3	-7.04131	0.00185998	0.390965	0.326063	0.0083691	0.26189	2.07732	['Q9HCC0']	MCCC2
1325	sp|P49721|PSB2_HUMAN	6	4	-0.734759	0.00186047	0.365297	1.14694	0.0083691	-1.65065	2.07732	['P49721']	PSMB2
3428	sp|Q9H1E3|NUCKS_HUMAN	5	3	#NAME?	0.00188258	0.49094	0.698954	0.00845942	-0.509649	2.07266	['Q9H1E3']	NUCKS1
590	sp|P05362|ICAM1_HUMAN	6	4	-2.12055	0.00190415	1.12181	0.886324	0.00854717	0.339924	2.06818	['P05362']	ICAM1
2080	sp|Q15004|PAF15_HUMAN	5	3	-31.8633	0.00191788	0.534427	0.301452	0.00859214	0.826066	2.0659	['Q15004']	KIAA0101
3498	sp|Q9H853|TBA4B_HUMAN	2	2	-1.85469	0.00191829	0.867783	1.14422	0.00859214	-0.398959	2.0659	['Q9H853']	TUBA4B
154	sp|O15260|SURF4_HUMAN	3	3	#NAME?	0.00192158	0.67807	0.679595	0.00859765	-0.00324044	2.06562	['O15260']	SURF4
2810	sp|Q8TDB6|DTX3L_HUMAN	7	3	-4.51327	0.00192907	0.551892	0.37341	0.00861516	0.563624	2.06474	['Q8TDB6']	DTX3L
3080	sp|Q96HE7|ERO1A_HUMAN	18	9	2.13248	0.00192963	1.2419	0.825642	0.00861516	0.588966	2.06474	['Q96HE7']	ERO1L
4091	sp|Q9Y4W6|AFG32_HUMAN	20	6	-16.0317	0.00193619	0.232641	0.348515	0.00862718	-0.583115	2.06413	['Q9Y4W6']	AFG3L2
817	sp|P15313|VATB1_HUMAN	4	3	-13.0157	0.00193646	0.337937	0.642399	0.00862718	-0.926717	2.06413	['P15313']	ATP6V1B1
1450	sp|P54687|BCAT1_HUMAN	3	2	-0.560399	0.00194315	0.823396	1.24623	0.00864776	-0.597912	2.0631	['P54687']	BCAT1
2770	sp|Q8NF91|SYNE1_HUMAN	5	3	-18.3018	0.00197233	0.235298	0.236568	0.00876015	-0.00776797	2.05749	['Q8NF91']	SYNE1
1709	sp|P84090|ERH_HUMAN	5	2	7.21294	0.00197261	0.87306	1.15361	0.00876015	-0.401998	2.05749	['P84090']	ERH
473	sp|O95400|CD2B2_HUMAN	5	4	-12.5457	0.0019801	0.738934	0.502391	0.00878405	0.556633	2.05631	['O95400']	CD2BP2
1623	sp|P62987|RL40_HUMAN	6	3	-5.02737	0.00198502	0.754733	1.30425	0.00879655	-0.78918	2.05569	['P62987']	UBA52
1531	sp|P61160|ARP2_HUMAN	10	6	-10.6989	0.00200295	0.514134	1.13865	0.00886656	-1.14711	2.05224	['P61160']	ACTR2
1127	sp|P35270|SPRE_HUMAN	4	3	#NAME?	0.00200706	0.524064	0.538859	0.00887532	-0.0401668	2.05182	['P35270']	SPR
1047	sp|P30086|PEBP1_HUMAN	7	7	1.11009	0.00200941	0.359527	1.14185	0.00887632	-1.66721	2.05177	['P30086']	PEBP1
2551	sp|Q7Z6Z7|HUWE1_HUMAN	22	11	-8.67707	0.002017	0.393587	0.601174	0.00890039	-0.611099	2.05059	['Q7Z6Z7']	HUWE1
2498	sp|Q71UM5|RS27L_HUMAN	3	3	2.80861	0.00202416	0.80252	1.2383	0.00891396	-0.625758	2.04993	['Q71UM5']	RPS27L
3955	sp|Q9UNX3|RL26L_HUMAN	8	4	2.24285	0.00202624	0.866901	1.18034	0.00891396	-0.445269	2.04993	['Q9UNX3']	RPL26L1
1905	sp|Q13177|PAK2_HUMAN	13	9	3.24136	0.00202648	0.377715	0.60706	0.00891396	-0.684542	2.04993	['Q13177']	PAK2
2435	sp|Q6P1L8|RM14_HUMAN	5	4	-4.23485	0.00204676	0.529113	0.403721	0.00898621	0.390215	2.04642	['Q6P1L8']	MRPL14
1733	sp|Q00839|HNRPU_HUMAN	28	13	-1.32459	0.00204722	0.959563	1.04382	0.00898621	-0.121429	2.04642	['Q00839']	HNRNPU
1209	sp|P42167|LAP2B_HUMAN	20	11	-0.115526	0.00205128	1.12482	0.878177	0.00899457	0.357114	2.04602	['P42167']	TMPO
3719	sp|Q9NYL4|FKB11_HUMAN	4	3	0.750622	0.00205349	1.11265	0.89213	0.00899481	0.318674	2.04601	['Q9NYL4']	FKBP11
3021	sp|Q96DB5|RMD1_HUMAN	5	3	-7.78828	0.00206122	0.563641	0.365864	0.0090192	0.623469	2.04483	['Q96DB5']	RMDN1
990	sp|P26373|RL13_HUMAN	8	5	-5.57281	0.00206735	0.856424	1.16762	0.00903652	-0.447177	2.044	['P26373']	RPL13
2697	sp|Q8N5K1|CISD2_HUMAN	7	6	-2.06574	0.00209084	1.11781	0.612522	0.00912962	0.867846	2.03955	['Q8N5K1']	CISD2
3361	sp|Q9BYG3|MK67I_HUMAN	12	6	3.56816	0.00210447	1.08535	0.92161	0.00917105	0.235936	2.03758	['Q9BYG3']	NIFK
2184	sp|Q16222|UAP1_HUMAN	14	6	0.379597	0.00210472	0.319187	0.5706	0.00917105	-0.838076	2.03758	['Q16222']	UAP1
142	sp|O15144|ARPC2_HUMAN	11	4	-9.70517	0.00211271	0.511684	1.08943	0.00919626	-1.09026	2.03639	['O15144']	ARPC2
4018	sp|Q9Y2R4|DDX52_HUMAN	10	5	-6.47708	0.00212163	0.368578	0.440197	0.00922545	-0.25618	2.03501	['Q9Y2R4']	DDX52
2552	sp|Q7Z739|YTHD3_HUMAN	8	3	-14.1528	0.00215433	0.445016	1.02906	0.00935785	-1.20939	2.02882	['Q7Z739']	YTHDF3
2247	sp|Q32MZ4|LRRF1_HUMAN	18	9	-12.5866	0.00215716	0.144439	0.258606	0.00935785	-0.840297	2.02882	['Q32MZ4']	LRRFIP1
130	sp|O14983|AT2A1_HUMAN	11	5	-3.6774	0.00215881	1.20592	0.819811	0.00935785	0.556771	2.02882	['O14983']	ATP2A1
992	sp|P26583|HMGB2_HUMAN	7	4	-4.95579	0.00216653	0.764945	1.26079	0.00937226	-0.720896	2.02816	['P26583']	HMGB2
1539	sp|P61247|RS3A_HUMAN	16	10	4.38543	0.00216663	0.885446	1.14883	0.00937226	-0.375693	2.02816	['P61247']	RPS3A
1509	sp|P60709|ACTB_HUMAN	24	11	1.59815	0.00217747	0.747613	1.27874	0.00939965	-0.774361	2.02689	['P60709']	ACTB
1644	sp|P63261|ACTG_HUMAN	24	11	1.3164	0.00217747	0.749985	1.27487	0.00939965	-0.765419	2.02689	['P63261']	ACTG1
732	sp|P11172|UMPS_HUMAN	11	7	-1.96934	0.00220928	0.406173	0.668663	0.00952709	-0.719183	2.02104	['P11172']	UMPS
2013	sp|Q14165|MLEC_HUMAN	8	4	-5.79061	0.00223739	0.455299	0.270597	0.00963836	0.75067	2.016	['Q14165']	MLEC
3619	sp|Q9NRL3|STRN4_HUMAN	5	3	#NAME?	0.00226907	0.331947	0.2924	0.00976472	0.183009	2.01034	['Q9NRL3']	STRN4
2532	sp|Q7Z3J3|RGPD4_HUMAN	15	10	-110.532	0.00228394	1.0504	0.592292	0.00981859	0.826553	2.00795	['Q7Z3J3']	RGPD4
303	sp|O60934|NBN_HUMAN	4	3	-5.02308	0.00230064	0.709087	0.58063	0.00988019	0.288344	2.00523	['O60934']	NBN
2201	sp|Q16630|CPSF6_HUMAN	7	3	-8.4148	0.00231371	0.516857	0.761116	0.00991827	-0.558353	2.00356	['Q16630']	CPSF6
532	sp|P00533|EGFR_HUMAN	16	7	-9.95992	0.00231426	0.590895	0.458555	0.00991827	0.365809	2.00356	['P00533']	EGFR
2935	sp|Q92896|GSLG1_HUMAN	18	11	-2.95543	0.00232958	0.489485	0.249564	0.00997364	0.971853	2.00115	['Q92896']	GLG1
1308	sp|P49411|EFTU_HUMAN	26	21	-2.59312	0.00233236	1.10816	0.904657	0.00997534	0.292718	2.00107	['P49411']	TUFM
2980	sp|Q96A65|EXOC4_HUMAN	3	2	#NAME?	0.00237215	0.238239	0.516463	0.0101351	-1.11626	1.99417	['Q96A65']	EXOC4
700	sp|P09960|LKHA4_HUMAN	12	5	-2.53146	0.00237572	0.388187	0.603849	0.01014	-0.637436	1.99396	['P09960']	LTA4H
2178	sp|Q15907|RB11B_HUMAN	11	8	-15.4756	0.00240104	1.03618	0.556366	0.0102376	0.897163	1.9898	['Q15907']	RAB11B
1188	sp|P40763|STAT3_HUMAN	7	4	-9.31514	0.00246642	0.351538	0.988674	0.0105056	-1.49181	1.97858	['P40763']	STAT3
570	sp|P04632|CPNS1_HUMAN	6	5	-3.13345	0.00247023	0.915354	0.778888	0.0105111	0.232915	1.97835	['P04632']	CAPNS1
1559	sp|P61960|UFM1_HUMAN	3	3	#NAME?	0.00248158	0.394355	0.53548	0.0105486	-0.441336	1.97681	['P61960']	UFM1
1745	sp|Q01650|LAT1_HUMAN	6	2	0.0978991	0.00254681	1.27418	0.78482	0.0108149	0.699133	1.96598	['Q01650']	SLC7A5
3717	sp|Q9NYH9|UTP6_HUMAN	9	5	-7.44778	0.00255363	0.715308	0.531857	0.0108328	0.427525	1.96526	['Q9NYH9']	UTP6
1390	sp|P51858|HDGF_HUMAN	15	6	-13.0102	0.00256067	0.333715	1.12773	0.0108516	-1.75673	1.9645	['P51858']	HDGF
1507	sp|P60604|UB2G2_HUMAN	2	2	#NAME?	0.00256531	0.704736	0.325212	0.0108603	1.1157	1.96416	['P60604']	UBE2G2
2678	sp|Q8N1G4|LRC47_HUMAN	9	5	-18.5554	0.00256964	0.446711	0.66414	0.0108675	-0.572145	1.96387	['Q8N1G4']	LRRC47
1360	sp|P50895|BCAM_HUMAN	6	3	#NAME?	0.00257686	1.01063	0.689062	0.010887	0.552551	1.96309	['P50895']	BCAM
2817	sp|Q8TEA7|TBCK_HUMAN	2	2	#NAME?	0.00258983	0.534512	0.549822	0.0109043	-0.0407411	1.9624	['Q8TEA7']	TBCK
2152	sp|Q15599|NHRF2_HUMAN	7	5	-17.0904	0.0025901	0.427644	0.460211	0.0109043	-0.105886	1.9624	['Q15599']	SLC9A3R2
310	sp|O75127|PTCD1_HUMAN	2	2	-13.4175	0.00259067	0.6784	0.379066	0.0109043	0.839688	1.9624	['O75127']	PTCD1
2089	sp|Q15021|CND1_HUMAN	22	13	0.0625227	0.0025914	0.371044	0.554672	0.0109043	-0.580046	1.9624	['Q15021']	NCAPD2
3471	sp|Q9H4M9|EHD1_HUMAN	20	9	-15.2737	0.00259897	0.26472	0.411942	0.0109205	-0.637974	1.96176	['Q9H4M9']	EHD1
3866	sp|Q9UIA9|XPO7_HUMAN	6	4	-8.73602	0.00260288	0.256141	0.43327	0.0109205	-0.75833	1.96176	['Q9UIA9']	XPO7
3637	sp|Q9NSK0|KLC4_HUMAN	8	5	#NAME?	0.00260311	0.23885	0.355739	0.0109205	-0.574715	1.96176	['Q9NSK0']	KLC4
1857	sp|Q12792|TWF1_HUMAN	9	5	-0.864564	0.00262467	0.417053	0.645524	0.0109999	-0.630242	1.95861	['Q12792']	TWF1
728	sp|P11117|PPAL_HUMAN	3	3	#NAME?	0.0026361	0.65132	0.454612	0.0110367	0.518731	1.95716	['P11117']	ACP2
88	sp|O14556|G3PT_HUMAN	2	2	-3.72278	0.00264619	0.541727	1.84595	0.0110678	-1.76873	1.95594	['O14556']	GAPDHS
3256	sp|Q9BRD0|BUD13_HUMAN	6	3	-5.18708	0.00266119	0.333149	0.573903	0.0111194	-0.784638	1.95392	['Q9BRD0']	BUD13
3559	sp|Q9NNW5|WDR6_HUMAN	3	2	-13.5557	0.00266803	1.03843	0.493387	0.0111368	1.07361	1.95324	['Q9NNW5']	WDR6
2240	sp|Q2QD12|RPEL1_HUMAN;sp|Q96AT9|RPE_HUMAN	2	2	#NAME?	0.00267154	0.486222	0.774192	0.0111403	-0.671075	1.9531	['Q2QD12', 'Q96AT9']	RPEL1
283	sp|O60684|IMA7_HUMAN	9	4	#NAME?	0.00269667	0.368391	0.650858	0.0112339	-0.821104	1.94947	['O60684']	KPNA6
2091	sp|Q15024|EXOS7_HUMAN	5	2	-7.14954	0.00271412	1.22467	0.808004	0.0112953	0.599955	1.9471	['Q15024']	EXOSC7
479	sp|O95470|SGPL1_HUMAN	9	5	-18.6534	0.00272862	0.537204	0.365701	0.0113443	0.554804	1.94522	['O95470']	SGPL1
669	sp|P08708|RS17_HUMAN;sp|P0CW22|RS17L_HUMAN	8	3	-9.52462	0.00278147	0.798863	1.21466	0.0115525	-0.604536	1.93732	['P08708', 'P0CW22']	RPS17
3079	sp|Q96HC4|PDLI5_HUMAN	18	9	-10.3061	0.00278697	0.310235	0.596296	0.0115639	-0.942668	1.9369	['Q96HC4']	PDLIM5
428	sp|O94905|ERLN2_HUMAN	9	4	-1.60694	0.00280619	1.11254	0.890022	0.011632	0.321938	1.93434	['O94905']	ERLIN2
2741	sp|Q8NCH0|CHSTE_HUMAN	2	2	-8.3818	0.00281963	1.09786	0.919409	0.0116734	0.255911	1.9328	['Q8NCH0']	CHST14
2828	sp|Q8TF68|ZN384_HUMAN	4	3	-11.353	0.00282429	0.442314	0.573703	0.0116734	-0.375235	1.9328	['Q8TF68']	ZNF384
2750	sp|Q8NDD1|CA131_HUMAN	2	2	#NAME?	0.00282456	0.675828	0.334124	0.0116734	1.01627	1.9328	['Q8NDD1']	C1orf131
2593	sp|Q86XL3|ANKL2_HUMAN	10	5	#NAME?	0.00283	0.360928	0.19188	0.0116842	0.911508	1.9324	['Q86XL3']	ANKLE2
635	sp|P07741|APT_HUMAN	5	4	6.37436	0.00284319	0.552266	1.09652	0.0117271	-0.989494	1.93081	['P07741']	APRT
3891	sp|Q9UKD2|MRT4_HUMAN	12	6	#NAME?	0.00286171	1.09749	0.911489	0.0117918	0.267917	1.92842	['Q9UKD2']	MRTO4
2327	sp|Q5RKV6|EXOS6_HUMAN	8	4	-18.4427	0.00290444	0.701147	0.562942	0.0119561	0.31673	1.92241	['Q5RKV6']	EXOSC6
1235	sp|P43897|EFTS_HUMAN	9	3	1.04348	0.00292317	1.12935	0.89039	0.0120213	0.342979	1.92005	['P43897']	TSFM
1139	sp|P35637|FUS_HUMAN	13	6	-11.9258	0.00295222	0.443003	1.10176	0.0121288	-1.31442	1.91618	['P35637']	FUS
3799	sp|Q9UBE0|SAE1_HUMAN	10	4	#NAME?	0.00297008	0.28767	0.376972	0.0121902	-0.390041	1.91399	['Q9UBE0']	SAE1
1134	sp|P35606|COPB2_HUMAN	16	11	-5.90351	0.00297623	0.485327	0.645639	0.0122034	-0.411771	1.91352	['P35606']	COPB2
3712	sp|Q9NY65|TBA8_HUMAN	11	4	-0.16952	0.00298094	0.870539	1.14498	0.0122107	-0.395346	1.91326	['Q9NY65']	TUBA8
3582	sp|Q9NQ29|LUC7L_HUMAN	8	5	-3.79555	0.00301161	0.361898	0.618937	0.0123242	-0.774208	1.90924	['Q9NQ29']	LUC7L
3151	sp|Q96RP9|EFGM_HUMAN	17	4	-14.5706	0.00301743	1.0944	0.919069	0.012336	0.251899	1.90883	['Q96RP9']	GFM1
2138	sp|Q15397|K0020_HUMAN	16	4	6.2321	0.00303441	1.08133	0.924786	0.0123922	0.225617	1.90685	['Q15397']	KIAA0020
1638	sp|P63173|RL38_HUMAN	5	4	#NAME?	0.00303713	0.385348	0.998558	0.0123922	-1.37368	1.90685	['P63173']	RPL38
1092	sp|P32322|P5CR1_HUMAN	8	4	-2.72682	0.00305055	1.32556	0.462445	0.0124348	1.51925	1.90536	['P32322']	PYCR1
1362	sp|P50914|RL14_HUMAN	5	4	-2.61342	0.00307322	0.605145	1.10683	0.012515	-0.871087	1.90257	['P50914']	RPL14
2856	sp|Q8WW12|PCNP_HUMAN	5	4	-0.621249	0.00309848	0.845846	1.19253	0.0126055	-0.495558	1.89944	['Q8WW12']	PCNP
3342	sp|Q9BXS5|AP1M1_HUMAN	4	3	#NAME?	0.00311348	0.425642	0.630468	0.0126521	-0.566781	1.89784	['Q9BXS5']	AP1M1
1688	sp|P81605|DCD_HUMAN	3	2	#NAME?	0.00311602	0.350061	0.693323	0.0126521	-0.985921	1.89784	['P81605']	DCD
536	sp|P01023|A2MG_HUMAN	6	2	-16.6647	0.00311913	1.07846	0.431702	0.0126521	1.32086	1.89784	['P01023']	A2M
1303	sp|P49257|LMAN1_HUMAN	15	7	2.02888	0.00312207	1.06235	0.948875	0.0126521	0.162971	1.89784	['P49257']	LMAN1
1632	sp|P63104|1433Z_HUMAN	16	5	-3.73917	0.00313456	0.871542	1.14226	0.0126904	-0.390254	1.89652	['P63104']	YWHAZ
1268	sp|P46977|STT3A_HUMAN	13	7	1.56103	0.00317388	0.928315	1.07472	0.0128162	-0.211279	1.89224	['P46977']	STT3A
1726	sp|Q00534|CDK6_HUMAN	3	2	#NAME?	0.00317468	0.342362	0.755422	0.0128162	-1.14176	1.89224	['Q00534']	CDK6
1396	sp|P51991|ROA3_HUMAN	13	8	-8.22567	0.00317486	0.809083	1.23238	0.0128162	-0.607086	1.89224	['P51991']	HNRNPA3
2595	sp|Q86Y46|K2C73_HUMAN	2	2	0.505275	0.00319959	0.251891	1.55612	0.012883	-2.62708	1.88998	['Q86Y46']	KRT73
1313	sp|P49458|SRP09_HUMAN	4	3	-2.1322	0.00320038	0.826022	1.24302	0.012883	-0.589602	1.88998	['P49458']	SRP9
4160	sp|Q9Y6M5|ZNT1_HUMAN	3	2	#NAME?	0.00320066	0.459997	0.199098	0.012883	1.20815	1.88998	['Q9Y6M5']	SLC30A1
1989	sp|Q13895|BYST_HUMAN	14	5	-11.8625	0.00325706	0.236965	0.454438	0.0130973	-0.939409	1.88282	['Q13895']	BYSL
1339	sp|P49841|GSK3B_HUMAN	2	2	-52.4951	0.00326173	0.650997	1.1524	0.0131035	-0.823915	1.88261	['P49841']	GSK3B
1088	sp|P31947|1433S_HUMAN	4	2	-15.89	0.00327254	0.888041	1.1341	0.013122	-0.352851	1.882	['P31947']	SFN
1751	sp|Q01844|EWS_HUMAN	9	4	-6.29029	0.00327264	0.903419	1.10705	0.013122	-0.293253	1.882	['Q01844']	EWSR1
740	sp|P11279|LAMP1_HUMAN	5	3	-13.6733	0.00332887	0.998018	1.00199	0.0133347	-0.00572596	1.87502	['P11279']	LAMP1
2945	sp|Q92973|TNPO1_HUMAN	14	9	-59.9882	0.00333688	0.504527	1.10244	0.0133539	-1.1277	1.87439	['Q92973']	TNPO1
1342	sp|P49903|SPS1_HUMAN	5	5	-19.7972	0.00336794	0.368677	0.563621	0.0134653	-0.612369	1.87078	['P49903']	SEPHS1
2129	sp|Q15363|TMED2_HUMAN	5	3	-9.47653	0.00341412	0.943973	0.44431	0.0136369	1.08718	1.86529	['Q15363']	TMED2
3237	sp|Q9BPX3|CND3_HUMAN	4	2	-9.62724	0.00344546	0.217044	1.14835	0.0137489	-2.4035	1.86173	['Q9BPX3']	NCAPG
2822	sp|Q8TEQ6|GEMI5_HUMAN	18	5	-7.80643	0.00345723	0.312804	0.462123	0.0137826	-0.563019	1.86067	['Q8TEQ6']	GEMIN5
3303	sp|Q9BV20|MTNA_HUMAN	2	2	#NAME?	0.00346822	0.505136	0.471309	0.0138133	0.1	1.8597	['Q9BV20']	MRI1
508	sp|O95831|AIFM1_HUMAN	15	11	#NAME?	0.00349973	1.02226	0.976328	0.0139254	0.0663232	1.85619	['O95831']	AIFM1
1473	sp|P55327|TPD52_HUMAN	7	3	6.89752	0.00350723	0.910999	1.10652	0.013942	-0.280512	1.85568	['P55327']	TPD52
1358	sp|P50748|KNTC1_HUMAN	2	2	#NAME?	0.0035803	0.743554	0.413693	0.0142174	0.845876	1.84718	['P50748']	KNTC1
217	sp|O43660|PLRG1_HUMAN	12	9	-9.27479	0.00358332	0.389307	0.323676	0.0142174	0.266358	1.84718	['O43660']	PLRG1
2583	sp|Q86VM9|ZCH18_HUMAN	13	6	-11.5658	0.00359725	0.753012	0.461663	0.0142591	0.705835	1.84591	['Q86VM9']	ZC3H18
1192	sp|P40926|MDHM_HUMAN	19	5	-1.20154	0.00362214	1.15286	0.863146	0.014341	0.417537	1.84342	['P40926']	MDH2
592	sp|P05387|RLA2_HUMAN	8	5	-1.33985	0.0036248	0.823827	1.18587	0.014341	-0.525531	1.84342	['P05387']	RPLP2
3630	sp|Q9NS86|LANC2_HUMAN	4	2	#NAME?	0.00364314	0.210847	0.462868	0.0143999	-1.1344	1.84164	['Q9NS86']	LANCL2
3538	sp|Q9HBR0|S38AA_HUMAN	3	3	#NAME?	0.00365181	0.473369	0.302432	0.0144205	0.646352	1.84102	['Q9HBR0']	SLC38A10
1990	sp|Q13907|IDI1_HUMAN	2	2	#NAME?	0.0036575	0.366696	1.02221	0.0144293	-1.47903	1.84075	['Q13907']	IDI1
1595	sp|P62491|RB11A_HUMAN	10	5	-12.599	0.00368461	1.0678	0.536412	0.0145225	0.993231	1.83796	['P62491']	RAB11A
3264	sp|Q9BRR6|ADPGK_HUMAN	7	5	#NAME?	0.00370844	0.669124	0.38772	0.0146026	0.787259	1.83557	['Q9BRR6']	ADPGK
3642	sp|Q9NTJ5|SAC1_HUMAN	15	7	-16.0153	0.00371962	0.408866	0.534664	0.0146329	-0.387007	1.83467	['Q9NTJ5']	SACM1L
1511	sp|P60842|IF4A1_HUMAN	20	9	13.7263	0.00374849	0.879552	1.12438	0.0147325	-0.35429	1.83172	['P60842']	EIF4A1
1637	sp|P63172|DYLT1_HUMAN	2	2	-9.37955	0.00382077	0.432727	1.26507	0.0149938	-1.54769	1.82409	['P63172']	DYNLT1
3988	sp|Q9Y263|PLAP_HUMAN	9	5	-2.64075	0.00382216	0.285766	0.463375	0.0149938	-0.697345	1.82409	['Q9Y263']	PLAA
1439	sp|P53992|SC24C_HUMAN	8	3	-2.82252	0.00384515	0.442662	0.652943	0.0150698	-0.560752	1.82189	['P53992']	SEC24C
2399	sp|Q6DD88|ATLA3_HUMAN	12	7	-18.7843	0.00387917	0.911137	0.495497	0.0151889	0.878791	1.81848	['Q6DD88']	ATL3
3296	sp|Q9BUJ2|HNRL1_HUMAN	19	12	-7.38349	0.00390286	0.433712	0.411502	0.0152568	0.0758358	1.81654	['Q9BUJ2']	HNRNPUL1
2907	sp|Q92615|LAR4B_HUMAN	9	3	#NAME?	0.00390383	0.430901	0.694316	0.0152568	-0.688236	1.81654	['Q92615']	LARP4B
3953	sp|Q9UNS2|CSN3_HUMAN	8	5	#NAME?	0.00391964	0.242973	0.375022	0.0153042	-0.626184	1.81519	['Q9UNS2']	COPS3
3472	sp|Q9H501|ESF1_HUMAN	12	5	-31.2727	0.00392452	0.42473	0.206142	0.0153089	1.04291	1.81506	['Q9H501']	ESF1
797	sp|P14324|FPPS_HUMAN	3	3	#NAME?	0.00394126	0.344394	0.55557	0.0153598	-0.689908	1.81361	['P14324']	FDPS
2210	sp|Q16718|NDUA5_HUMAN	4	3	-15.9742	0.00395173	0.3498	0.360144	0.0153762	-0.0420431	1.81315	['Q16718']	NDUFA5
3135	sp|Q96PU8|QKI_HUMAN	8	2	-9.95939	0.00395282	0.794735	1.22526	0.0153762	-0.624545	1.81315	['Q96PU8']	QKI
2957	sp|Q93096|TP4A1_HUMAN	4	3	-24.92	0.00396552	0.222728	0.411916	0.0154033	-0.887068	1.81238	['Q93096']	PTP4A1
1922	sp|Q13347|EIF3I_HUMAN	12	7	5.58718	0.00397007	0.942054	1.05179	0.0154033	-0.158965	1.81238	['Q13347']	EIF3I
1871	sp|Q12905|ILF2_HUMAN	17	9	-15.5901	0.00397089	1.11213	0.896893	0.0154033	0.310324	1.81238	['Q12905']	ILF2
1231	sp|P43307|SSRA_HUMAN	4	2	#NAME?	0.0039822	1.15171	0.874755	0.0154329	0.396822	1.81155	['P43307']	SSR1
2403	sp|Q6DN03|H2B2C_HUMAN;sp|Q6DRA6|H2B2D_HUMAN	4	3	-3.9862	0.00403332	1.10447	0.901751	0.015602	0.292552	1.80682	['Q6DN03', 'Q6DRA6']	HIST2H2BC
2680	sp|Q8N257|H2B3B_HUMAN	8	3	-4.32884	0.00403332	1.10133	0.904413	0.015602	0.284198	1.80682	['Q8N257']	HIST3H2BB
136	sp|O15067|PUR4_HUMAN	27	10	6.58608	0.00406075	0.516017	0.68279	0.0156936	-0.404023	1.80428	['O15067']	PFAS
2097	sp|Q15043|S39AE_HUMAN	4	4	0.879807	0.0041001	0.740389	0.595293	0.0158309	0.314684	1.80049	['Q15043']	SLC39A14
1765	sp|Q02543|RL18A_HUMAN	11	3	-7.48007	0.00411184	0.881311	0.442695	0.0158616	0.993338	1.79965	['Q02543']	RPL18A
606	sp|P06576|ATPB_HUMAN	21	11	-2.70254	0.00411784	1.03644	0.964602	0.0158701	0.103629	1.79942	['P06576']	ATP5B
1025	sp|P29144|TPP2_HUMAN	17	14	#NAME?	0.00413194	0.586274	0.598216	0.0159097	-0.029091	1.79834	['P29144']	TPP2
774	sp|P13073|COX41_HUMAN	6	3	2.28047	0.00414768	1.07529	0.927835	0.0159555	0.212789	1.79709	['P13073']	COX4I1
3415	sp|Q9H0L4|CSTFT_HUMAN	8	4	-3.21852	0.00420779	1.17892	0.866195	0.0161719	0.444703	1.79124	['Q9H0L4']	CSTF2T
1011	sp|P28066|PSA5_HUMAN	7	2	9.23549	0.00421432	0.873929	1.13655	0.016182	-0.379071	1.79097	['P28066']	PSMA5
535	sp|P00846|ATP6_HUMAN	3	2	5.84104	0.00422435	0.827436	1.26716	0.0162057	-0.614879	1.79033	['P00846']	MT-ATP6
439	sp|O95104|SFR15_HUMAN	6	3	-6.88462	0.00422838	1.14228	0.869923	0.0162062	0.392952	1.79032	['O95104']	SCAF4
1221	sp|P42766|RL35_HUMAN	5	4	-10.4002	0.00424188	0.479057	1.05644	0.016225	-1.14094	1.78982	['P42766']	RPL35
1566	sp|P62072|TIM10_HUMAN	3	2	#NAME?	0.0042437	1.16761	0.863469	0.016225	0.435342	1.78982	['P62072']	TIMM10
3633	sp|Q9NSD9|SYFB_HUMAN	14	8	-0.978938	0.00424495	0.383838	0.537897	0.016225	-0.486835	1.78982	['Q9NSD9']	FARSB
1900	sp|Q13148|TADBP_HUMAN	8	2	#NAME?	0.00426439	0.799209	1.25124	0.0162843	-0.64671	1.78823	['Q13148']	TARDBP
3210	sp|Q99653|CHP1_HUMAN	5	3	-9.6359	0.00427147	0.599867	0.646712	0.0162964	-0.108482	1.78791	['Q99653']	CHP1
191	sp|O43252|PAPS1_HUMAN	3	3	-28.0655	0.00431211	0.307593	0.621978	0.0164365	-1.01584	1.78419	['O43252']	PAPSS1
376	sp|O75694|NU155_HUMAN	25	15	-12.1296	0.00432642	0.407813	0.353294	0.016476	0.207039	1.78315	['O75694']	NUP155
3188	sp|Q99471|PFD5_HUMAN	3	2	4.53447	0.00436645	0.622943	1.13804	0.0166132	-0.86938	1.77955	['Q99471']	PFDN5
808	sp|P14868|SYDC_HUMAN	26	11	0.303038	0.00437691	0.935832	1.07091	0.0166378	-0.19451	1.7789	['P14868']	DARS
923	sp|P21796|VDAC1_HUMAN	13	6	-9.03831	0.00440985	1.17464	0.837376	0.0167478	0.488275	1.77604	['P21796']	VDAC1
917	sp|P21281|VATB2_HUMAN	14	7	-6.28769	0.00446233	0.228559	0.472725	0.0169317	-1.04844	1.7713	['P21281']	ATP6V1B2
3931	sp|Q9UM00|TMCO1_HUMAN	5	3	-5.6992	0.00448423	1.00094	0.647099	0.0169993	0.629297	1.76957	['Q9UM00']	TMCO1
3045	sp|Q96EY7|PTCD3_HUMAN	8	3	-12.7391	0.0044979	1.11953	0.484258	0.0170357	1.20904	1.76864	['Q96EY7']	PTCD3
3786	sp|Q9P2N5|RBM27_HUMAN	9	4	-4.98437	0.00450618	0.619222	0.302082	0.0170515	1.03552	1.76824	['Q9P2N5']	RBM27
930	sp|P22087|FBRL_HUMAN	14	7	0.188783	0.00451859	0.967996	1.03425	0.017083	-0.0955137	1.76744	['P22087']	FBL
2783	sp|Q8NHV4|NEDD1_HUMAN	4	2	-8.22665	0.00461719	0.868371	1.16994	0.0174399	-0.430057	1.75846	['Q8NHV4']	NEDD1
208	sp|O43493|TGON2_HUMAN	8	3	-5.59078	0.00463466	1.10374	0.497617	0.0174901	1.14929	1.75721	['O43493']	TGOLN2
190	sp|O43251|RFOX2_HUMAN	6	2	-8.72763	0.00470579	1.00118	0.378921	0.0177425	1.40172	1.75099	['O43251']	RBFOX2
3234	sp|Q99986|VRK1_HUMAN	12	9	-73.4314	0.00480957	0.573523	0.606899	0.0181056	-0.081606	1.74219	['Q99986']	VRK1
3725	sp|Q9NYV4|CDK12_HUMAN	9	3	-13.0553	0.00481079	0.36694	0.31795	0.0181056	0.206746	1.74219	['Q9NYV4']	CDK12
699	sp|P09936|UCHL1_HUMAN	9	6	0.303171	0.00481545	0.87033	1.12474	0.0181068	-0.369963	1.74216	['P09936']	UCHL1
588	sp|P05187|PPB1_HUMAN	3	2	#NAME?	0.0048369	0.0814175	0.285338	0.0181711	-1.80926	1.74062	['P05187']	ALPP
296	sp|O60832|DKC1_HUMAN	19	9	-5.35905	0.00487699	1.07443	0.54398	0.0183052	0.981946	1.73743	['O60832']	DKC1
1159	sp|P36957|ODO2_HUMAN	12	8	-3.70477	0.00488167	1.07036	0.932628	0.0183063	0.198726	1.7374	['P36957']	DLST
1500	sp|P59998|ARPC4_HUMAN	5	5	6.30493	0.00491421	0.9201	1.07576	0.0184117	-0.225487	1.73491	['P59998']	ARPC4
1101	sp|P33316|DUT_HUMAN	9	4	-8.03651	0.0049745	0.800442	1.24658	0.0186209	-0.639107	1.73	['P33316']	DUT
1370	sp|P51148|RAB5C_HUMAN	9	5	-4.41761	0.00503319	0.972358	1.02821	0.0188237	-0.0805756	1.7253	['P51148']	RAB5C
531	sp|P00505|AATM_HUMAN	18	8	-5.29728	0.00505596	1.11015	0.895489	0.0188919	0.310008	1.72372	['P00505']	GOT2
2717	sp|Q8N9N7|LRC57_HUMAN	2	2	#NAME?	0.00507383	0.597126	0.580207	0.0189417	0.0414667	1.72258	['Q8N9N7']	LRRC57
3357	sp|Q9BYD1|RM13_HUMAN	7	3	-2.32505	0.0051184	0.883336	1.13207	0.019091	-0.357932	1.71917	['Q9BYD1']	MRPL13
1979	sp|Q13733|AT1A4_HUMAN	8	4	-0.501858	0.00512552	0.483881	0.910704	0.0191005	-0.91233	1.71896	['Q13733']	ATP1A4
2581	sp|Q86V81|THOC4_HUMAN	11	5	#NAME?	0.00515777	0.819995	1.19373	0.0192035	-0.541787	1.71662	['Q86V81']	ALYREF
3106	sp|Q96K17|BT3L4_HUMAN	5	2	#NAME?	0.00517594	1.31944	0.348425	0.0192539	1.921	1.71548	['Q96K17']	BTF3L4
2541	sp|Q7Z4W1|DCXR_HUMAN	2	2	#NAME?	0.00520756	1.00169	0.464611	0.0193543	1.10834	1.71322	['Q7Z4W1']	DCXR
2243	sp|Q2TAL8|QRIC1_HUMAN	2	2	#NAME?	0.00521869	0.670536	1.05394	0.0193784	-0.652408	1.71268	['Q2TAL8']	QRICH1
1155	sp|P36871|PGM1_HUMAN	10	3	-13.8099	0.00524771	0.551281	1.0597	0.0194688	-0.942799	1.71066	['P36871']	PGM1
853	sp|P17655|CAN2_HUMAN	9	5	-35.4827	0.00531164	0.396705	0.537327	0.0196885	-0.437735	1.70579	['P17655']	CAPN2
963	sp|P24539|AT5F1_HUMAN	7	3	#NAME?	0.0053175	0.0889129	0.345869	0.0196927	-1.95976	1.7057	['P24539']	ATP5F1
2397	sp|Q69YN4|VIR_HUMAN	6	5	-4.947	0.00532607	0.538675	0.389301	0.0197069	0.46853	1.70538	['Q69YN4']	KIAA1429
1106	sp|P34741|SDC2_HUMAN	6	4	-10.3468	0.00535806	0.991905	1.00775	0.0197928	-0.0228664	1.70349	['P34741']	SDC2
1087	sp|P31946|1433B_HUMAN	12	6	7.17365	0.00535877	0.908578	1.08721	0.0197928	-0.258942	1.70349	['P31946']	YWHAB
719	sp|P10599|THIO_HUMAN	5	3	-4.50094	0.00540094	0.932413	1.07249	0.0199309	-0.201919	1.70047	['P10599']	TXN
207	sp|O43491|E41L2_HUMAN	36	25	-14.7045	0.00549227	0.447053	0.329664	0.02025	0.439449	1.69357	['O43491']	EPB41L2
1627	sp|P63010|AP2B1_HUMAN	24	13	-14.1092	0.00550528	1.05849	0.941614	0.0202644	0.168806	1.69327	['P63010']	AP2B1
1899	sp|Q13136|LIPA1_HUMAN	19	11	-10.8481	0.0055059	0.295291	0.477961	0.0202644	-0.694757	1.69327	['Q13136']	PPFIA1
578	sp|P05026|AT1B1_HUMAN	7	4	-1.68996	0.00555773	1.10677	0.902437	0.0204371	0.294453	1.68958	['P05026']	ATP1B1
2401	sp|Q6DKJ4|NXN_HUMAN	4	3	#NAME?	0.00556902	0.457053	0.615844	0.0204606	-0.430205	1.68908	['Q6DKJ4']	NXN
1588	sp|P62316|SMD2_HUMAN	7	6	-3.38005	0.00559964	1.06734	0.929882	0.020555	0.198903	1.68708	['P62316']	SNRPD2
1794	sp|Q04917|1433F_HUMAN	13	4	3.26926	0.00561728	0.21216	0.325406	0.0206016	-0.617087	1.6861	['Q04917']	YWHAH
756	sp|P12109|CO6A1_HUMAN	6	4	-11.848	0.00562551	0.489302	0.318361	0.0206137	0.620061	1.68584	['P12109']	COL6A1
760	sp|P12236|ADT3_HUMAN	15	7	-2.80081	0.00563594	1.06155	0.944002	0.0206338	0.169309	1.68542	['P12236']	SLC25A6
1329	sp|P49755|TMEDA_HUMAN	6	3	#NAME?	0.00566636	1.13343	0.317587	0.0207269	1.83547	1.68346	['P49755']	TMED10
3752	sp|Q9P032|NDUF4_HUMAN	6	4	-6.15295	0.00571075	0.421909	0.250747	0.020871	0.750698	1.68046	['Q9P032']	NDUFAF4
126	sp|O14974|MYPT1_HUMAN	23	8	-8.88126	0.00572804	0.482811	0.345848	0.0209159	0.481321	1.67952	['O14974']	PPP1R12A
928	sp|P22059|OSBP1_HUMAN	6	3	-3.28196	0.00574966	0.354513	0.545364	0.0209648	-0.621381	1.67851	['P22059']	OSBP
481	sp|O95487|SC24B_HUMAN	2	2	#NAME?	0.00575151	0.35394	0.303438	0.0209648	0.222101	1.67851	['O95487']	SEC24B
54	sp|O00330|ODPX_HUMAN	9	3	-1.86889	0.00577487	0.545753	1.02902	0.0210316	-0.914953	1.67713	['O00330']	PDHX
2894	sp|Q92541|RTF1_HUMAN	6	3	-13.5498	0.00580495	0.440273	0.645137	0.0211227	-0.551205	1.67525	['Q92541']	RTF1
1651	sp|P67870|CSK2B_HUMAN	7	4	-8.66025	0.00582701	1.06231	0.242709	0.0211795	2.1299	1.67408	['P67870']	CSNK2B
113	sp|O14818|PSA7_HUMAN	8	6	4.63252	0.00583071	0.863227	1.16284	0.0211795	-0.429838	1.67408	['O14818']	PSMA7
3754	sp|Q9P0I2|EMC3_HUMAN	7	3	-4.14089	0.00589439	0.687859	0.441722	0.0213922	0.638973	1.66975	['Q9P0I2']	EMC3
3445	sp|Q9H307|PININ_HUMAN	26	11	-2.59571	0.00608288	1.08776	0.924904	0.022057	0.233978	1.65645	['Q9H307']	PNN
3395	sp|Q9GZS3|WDR61_HUMAN	4	3	-10.4501	0.00611091	1.02386	0.561654	0.0221394	0.86626	1.65483	['Q9GZS3']	WDR61
3973	sp|Q9UQ35|SRRM2_HUMAN	36	12	-9.42237	0.00617025	0.973469	0.570062	0.022335	0.772018	1.65101	['Q9UQ35']	SRRM2
593	sp|P05388|RLA0_HUMAN	13	7	-9.21312	0.00624649	0.92411	1.09345	0.0225914	-0.242754	1.64606	['P05388']	RPLP0
1862	sp|Q12841|FSTL1_HUMAN	10	7	-2.77373	0.006299	1.0694	0.932079	0.0227615	0.198274	1.6428	['Q12841']	FSTL1
3206	sp|Q99614|TTC1_HUMAN	12	5	#NAME?	0.0063887	0.344441	0.426286	0.0230508	-0.307564	1.63731	['Q99614']	TTC1
2032	sp|Q14332|FZD2_HUMAN	3	2	-6.72634	0.0063901	1.02753	0.447618	0.0230508	1.19885	1.63731	['Q14332']	FZD2
3557	sp|Q9HD45|TM9S3_HUMAN	8	2	-5.14991	0.00639839	1.13258	0.874407	0.0230607	0.373237	1.63713	['Q9HD45']	TM9SF3
1764	sp|Q02539|H11_HUMAN	6	4	5.4893	0.00642051	1.1034	0.893746	0.0231205	0.304021	1.636	['Q02539']	HIST1H1A
936	sp|P22570|ADRO_HUMAN	3	2	#NAME?	0.00648822	0.700978	0.37719	0.0233442	0.894079	1.63182	['P22570']	FDXR
1826	sp|Q08209|PP2BA_HUMAN	6	2	#NAME?	0.00656363	0.873846	1.14422	0.0235951	-0.388919	1.62718	['Q08209']	PPP3CA
3777	sp|Q9P2B4|CT2NL_HUMAN	5	4	#NAME?	0.00662319	0.405741	0.541814	0.0237887	-0.417237	1.62363	['Q9P2B4']	CTTNBP2NL
1295	sp|P48741|HSP77_HUMAN	4	3	-5.80459	0.0067279	1.05959	0.94376	0.0241233	0.167016	1.61756	['P48741']	HSPA7
843	sp|P17066|HSP76_HUMAN	7	3	-4.89557	0.0067279	1.0683	0.93607	0.0241233	0.190624	1.61756	['P17066']	HSPA6
3877	sp|Q9UJA5|TRM6_HUMAN	7	4	-17.1397	0.00676426	0.322971	0.461849	0.0242328	-0.516013	1.6156	['Q9UJA5']	TRMT6
3363	sp|Q9BYK8|HELZ2_HUMAN	9	4	-2.34688	0.00678166	0.393198	0.219933	0.0242566	0.838188	1.61517	['Q9BYK8']	HELZ2
3381	sp|Q9C0B1|FTO_HUMAN	2	2	#NAME?	0.00678788	0.388661	0.606515	0.0242566	-0.642033	1.61517	['Q9C0B1']	FTO
4001	sp|Q9Y2D5|AKAP2_HUMAN	17	8	#NAME?	0.00678835	0.568086	0.446943	0.0242566	0.346019	1.61517	['Q9Y2D5']	AKAP2
890	sp|P19447|ERCC3_HUMAN	3	2	#NAME?	0.0068524	0.545901	0.33066	0.0244645	0.723289	1.61146	['P19447']	ERCC3
438	sp|O95071|UBR5_HUMAN	4	2	#NAME?	0.00686267	0.11928	0.279216	0.0244802	-1.22703	1.61119	['O95071']	UBR5
2530	sp|Q7Z3B4|NUP54_HUMAN	11	6	#NAME?	0.00697126	0.947274	0.611494	0.0248463	0.631443	1.60474	['Q7Z3B4']	NUP54
1714	sp|P84157|MXRA7_HUMAN	5	3	6.69992	0.00701967	0.845619	0.851795	0.0249975	-0.0104981	1.6021	['P84157']	MXRA7
3132	sp|Q96PK6|RBM14_HUMAN	23	12	3.4223	0.00707004	0.979021	1.02167	0.025152	-0.061519	1.59943	['Q96PK6']	RBM14
3600	sp|Q9NQX7|ITM2C_HUMAN	3	2	-1.9736	0.00707513	0.900827	1.11009	0.025152	-0.301355	1.59943	['Q9NQX7']	ITM2C
2158	sp|Q15645|PCH2_HUMAN	8	5	0.438983	0.00710115	0.460223	0.653628	0.025223	-0.506134	1.5982	['Q15645']	TRIP13
137	sp|O15083|ERC2_HUMAN	2	2	#NAME?	0.00713471	0.682254	0.232066	0.0253206	1.55578	1.59653	['O15083']	ERC2
725	sp|P10809|CH60_HUMAN	37	17	2.21523	0.00715506	1.12219	0.890238	0.0253713	0.33405	1.59566	['P10809']	HSPD1
1237	sp|P45880|VDAC2_HUMAN	9	7	-1.61708	0.00722254	1.20834	0.828537	0.0255888	0.54439	1.59195	['P45880']	VDAC2
3696	sp|Q9NX46|ARHL2_HUMAN	6	5	#NAME?	0.0072493	0.398764	0.348068	0.0256618	0.196165	1.59071	['Q9NX46']	ADPRHL2
1164	sp|P37802|TAGL2_HUMAN	14	7	-8.16386	0.00733465	0.325867	1.18126	0.0259419	-1.85798	1.586	['P37802']	TAGLN2
2570	sp|Q86UE4|LYRIC_HUMAN	17	8	-4.26569	0.00739724	0.597881	0.451849	0.0261411	0.404017	1.58268	['Q86UE4']	MTDH
2269	sp|Q4G0N4|NAKD2_HUMAN	4	3	-12.6277	0.00743542	0.709344	0.485507	0.0262538	0.546993	1.58081	['Q4G0N4']	NADK2
3907	sp|Q9UKY7|CDV3_HUMAN	7	4	-15.8251	0.00752128	0.612983	1.02606	0.0265345	-0.743202	1.57619	['Q9UKY7']	CDV3
1851	sp|Q10713|MPPA_HUMAN	12	7	-16.0969	0.00759153	0.511665	0.217988	0.0267597	1.23095	1.57252	['Q10713']	PMPCA
1546	sp|P61457|PHS_HUMAN	2	2	#NAME?	0.00767979	0.629156	0.723608	0.0270479	-0.20179	1.56787	['P61457']	PCBD1
3228	sp|Q99848|EBP2_HUMAN	12	8	3.60002	0.00769031	1.07708	0.927663	0.0270621	0.215458	1.56764	['Q99848']	EBNA1BP2
770	sp|P12931|SRC_HUMAN	2	2	#NAME?	0.00771215	0.942625	0.697981	0.0271161	0.433495	1.56677	['P12931']	SRC
2430	sp|Q6NZY4|ZCHC8_HUMAN	13	5	-6.74075	0.00783348	0.718987	0.600487	0.0275034	0.259833	1.56061	['Q6NZY4']	ZCCHC8
172	sp|O15446|RPA34_HUMAN	7	5	-9.5909	0.00783551	0.781354	0.64232	0.0275034	0.282685	1.56061	['O15446']	CD3EAP
4058	sp|Q9Y3D0|MIP18_HUMAN	3	2	#NAME?	0.00794289	0.579393	0.564374	0.0278569	0.0378915	1.55507	['Q9Y3D0']	FAM96B
787	sp|P13798|ACPH_HUMAN	5	4	-2.53141	0.00796745	0.393981	0.600652	0.0279196	-0.608405	1.55409	['P13798']	APEH
500	sp|O95782|AP2A1_HUMAN	21	12	0.936763	0.00800597	0.666109	0.497336	0.028031	0.421539	1.55236	['O95782']	AP2A1
1310	sp|P49419|AL7A1_HUMAN	11	5	-9.21583	0.00806335	1.04331	0.94997	0.0282082	0.135218	1.54962	['P49419']	ALDH7A1
2222	sp|Q16881|TRXR1_HUMAN	13	9	2.42393	0.00809881	0.437942	0.619242	0.0283085	-0.499763	1.54808	['Q16881']	TXNRD1
2189	sp|Q16513|PKN2_HUMAN	12	5	-13.1686	0.00811768	0.402523	0.524645	0.0283507	-0.38227	1.54744	['Q16513']	PKN2
874	sp|P18669|PGAM1_HUMAN	12	7	0.731231	0.00812634	0.457251	1.17054	0.0283572	-1.35612	1.54734	['P18669']	PGAM1
2855	sp|Q8WW01|SEN15_HUMAN	2	2	#NAME?	0.00822099	0.409867	0.585579	0.0286472	-0.514709	1.54292	['Q8WW01']	TSEN15
2569	sp|Q86U86|PB1_HUMAN	15	10	#NAME?	0.00822318	0.139369	0.224868	0.0286472	-0.690172	1.54292	['Q86U86']	PBRM1
282	sp|O60664|PLIN3_HUMAN	14	4	4.77671	0.00837225	0.924028	1.08927	0.0291421	-0.237359	1.53548	['O60664']	PLIN3
1853	sp|Q12765|SCRN1_HUMAN	10	4	-26.3954	0.00838688	0.530734	1.0475	0.0291687	-0.980891	1.53508	['Q12765']	SCRN1
3790	sp|Q9P2W9|STX18_HUMAN	5	3	#NAME?	0.00842873	0.582869	0.493716	0.0292898	0.239491	1.53328	['Q9P2W9']	STX18
1140	sp|P35658|NU214_HUMAN	24	13	#NAME?	0.00845738	0.472355	0.427808	0.0293649	0.142907	1.53217	['P35658']	NUP214
3737	sp|Q9NZL9|MAT2B_HUMAN	5	4	#NAME?	0.00848525	0.433621	0.726434	0.0294183	-0.744399	1.53138	['Q9NZL9']	MAT2B
2136	sp|Q15392|DHC24_HUMAN	7	5	#NAME?	0.00848687	0.455489	0.325275	0.0294183	0.485756	1.53138	['Q15392']	DHCR24
72	sp|O00507|USP9Y_HUMAN	17	9	-11.5942	0.0085026	0.374327	0.518055	0.0294484	-0.468807	1.53094	['O00507']	USP9Y
386	sp|O75828|CBR3_HUMAN	2	2	6.45167	0.00852825	0.661917	1.06256	0.0295127	-0.682825	1.52999	['O75828']	CBR3
514	sp|O95983|MBD3_HUMAN	8	4	#NAME?	0.00855504	0.594654	0.522487	0.0295809	0.186656	1.52899	['O95983']	MBD3
2964	sp|Q969Q0|RL36L_HUMAN	5	3	-6.86151	0.00858364	0.384707	0.318573	0.0296306	0.272139	1.52826	['Q969Q0']	RPL36AL
1705	sp|P83881|RL36A_HUMAN	5	3	-3.09449	0.00858364	0.385571	0.406741	0.0296306	-0.0771131	1.52826	['P83881']	RPL36A
1606	sp|P62841|RS15_HUMAN	5	3	-19.5098	0.00861107	0.6815	1.41675	0.0296994	-1.0558	1.52725	['P62841']	RPS15
1981	sp|Q13769|THOC5_HUMAN	9	8	-12.8961	0.00861781	0.289898	0.370353	0.0296994	-0.353356	1.52725	['Q13769']	THOC5
2270	sp|Q4G0P3|HYDIN_HUMAN	4	2	-4.91138	0.00876145	0.775078	0.698894	0.0301695	0.149266	1.52043	['Q4G0P3']	HYDIN
1607	sp|P62847|RS24_HUMAN	5	3	-10.9903	0.00881839	0.834819	1.19786	0.0303405	-0.520929	1.51798	['P62847']	RPS24
3118	sp|Q96ME7|ZN512_HUMAN	8	4	-5.92272	0.00885414	0.657112	0.629519	0.0304384	0.0618907	1.51658	['Q96ME7']	ZNF512
2000	sp|Q14103|HNRPD_HUMAN	12	5	-2.5487	0.00889695	1.12517	0.875356	0.0305604	0.362197	1.51484	['Q14103']	HNRNPD
889	sp|P19404|NDUV2_HUMAN	9	3	-21.8336	0.00892473	1.10045	0.897309	0.0306305	0.29442	1.51385	['P19404']	NDUFV2
2276	sp|Q4V328|GRAP1_HUMAN	7	2	#NAME?	0.00894034	0.586999	0.282388	0.0306447	1.05568	1.51364	['Q4V328']	GRIPAP1
3022	sp|Q96DI7|SNR40_HUMAN	13	8	-7.94114	0.00894355	0.591843	0.403506	0.0306447	0.552625	1.51364	['Q96DI7']	SNRNP40
2736	sp|Q8NC51|PAIRB_HUMAN	24	19	#NAME?	0.00896717	0.949697	0.337472	0.0307004	1.4927	1.51286	['Q8NC51']	SERBP1
951	sp|P23396|RS3_HUMAN	16	6	-3.81322	0.00900346	0.835266	1.21301	0.0307994	-0.53828	1.51146	['P23396']	RPS3
2438	sp|Q6P1N9|TATD1_HUMAN	5	2	#NAME?	0.00904434	0.312422	0.617557	0.0309138	-0.983077	1.50985	['Q6P1N9']	TATDN1
2350	sp|Q5TAP6|UT14C_HUMAN	4	2	#NAME?	0.00909235	1.06911	0.655126	0.0310525	0.706564	1.5079	['Q5TAP6']	UTP14C
402	sp|O75964|ATP5L_HUMAN	4	2	#NAME?	0.00913744	1.04342	0.551586	0.031181	0.919661	1.50611	['O75964']	ATP5L
156	sp|O15270|SPTC2_HUMAN	11	7	-3.97098	0.00918549	0.546863	0.301843	0.0313193	0.857383	1.50419	['O15270']	SPTLC2
391	sp|O75880|SCO1_HUMAN	4	2	9.06657	0.0091955	0.802349	1.24795	0.0313278	-0.637259	1.50407	['O75880']	SCO1
1602	sp|P62820|RAB1A_HUMAN	12	8	-13.5195	0.00926021	0.925005	1.07906	0.0315135	-0.222244	1.5015	['P62820']	RAB1A
3302	sp|Q9BUR5|APOO_HUMAN	3	2	-6.63963	0.00926511	1.03153	0.663792	0.0315135	0.635978	1.5015	['Q9BUR5']	APOO
1071	sp|P31040|SDHA_HUMAN	20	11	-2.31927	0.00940162	0.472252	0.437501	0.0319517	0.110271	1.49551	['P31040']	SDHA
2066	sp|Q14847|LASP1_HUMAN	15	9	-0.878743	0.0094247	0.874025	1.13623	0.0320041	-0.378513	1.49479	['Q14847']	LASP1
1141	sp|P35659|DEK_HUMAN	13	5	-4.5477	0.00944311	1.01201	0.986913	0.0320405	0.0362306	1.4943	['P35659']	DEK
3140	sp|Q96QC0|PP1RA_HUMAN	11	4	-15.4401	0.00945662	0.604259	0.276788	0.0320602	1.12638	1.49403	['Q96QC0']	PPP1R10
556	sp|P03886|NU1M_HUMAN	2	2	#NAME?	0.00947479	0.485626	0.991486	0.0320958	-1.02975	1.49355	['P03886']	MT-ND1
1961	sp|Q13595|TRA2A_HUMAN	4	3	-3.85915	0.00963004	1.04637	0.947155	0.0325952	0.143722	1.48685	['Q13595']	TRA2A
1318	sp|P49590|SYHM_HUMAN	7	2	#NAME?	0.00968256	0.889796	1.11104	0.0327464	-0.320367	1.48484	['P49590']	HARS2
2949	sp|Q93008|USP9X_HUMAN	33	17	-7.09642	0.00977819	0.36458	0.55347	0.033043	-0.602269	1.48092	['Q93008']	USP9X
2415	sp|Q6K0P9|IFIX_HUMAN	2	2	#NAME?	0.00989748	0.445138	0.219361	0.033419	1.02095	1.47601	['Q6K0P9']	PYHIN1
3220	sp|Q99757|THIOM_HUMAN	4	3	#NAME?	0.00993287	0.573495	0.645683	0.0335114	-0.171043	1.47481	['Q99757']	TXN2
2892	sp|Q92536|YLAT2_HUMAN	2	2	#NAME?	0.00997134	0.451659	0.513769	0.033614	-0.185886	1.47348	['Q92536']	SLC7A6
2038	sp|Q14527|HLTF_HUMAN	3	2	-17.4105	0.010044	0.390309	0.654795	0.0338314	-0.746426	1.47068	['Q14527']	HLTF
2608	sp|Q8IUZ5|AT2L2_HUMAN	2	2	#NAME?	0.0100977	0.552689	0.176433	0.0339779	1.64735	1.4688	['Q8IUZ5']	PHYKPL
3497	sp|Q9H845|ACAD9_HUMAN	15	6	-17.3849	0.0101037	0.520397	0.720529	0.0339779	-0.469444	1.4688	['Q9H845']	ACAD9
1951	sp|Q13526|PIN1_HUMAN	5	3	2.54897	0.0101294	0.214689	0.408552	0.0340366	-0.928269	1.46805	['Q13526']	PIN1
2151	sp|Q15532|SSXT_HUMAN	2	2	#NAME?	0.0101768	0.588977	0.461943	0.0341686	0.350494	1.46637	['Q15532']	SS18
2495	sp|Q70UQ0|IKIP_HUMAN	15	7	0.169475	0.0102507	1.08325	0.927967	0.0343889	0.223215	1.46358	['Q70UQ0']	IKBIP
3524	sp|Q9HAF1|EAF6_HUMAN	3	3	-12.4055	0.0103042	0.588851	0.314784	0.0345407	0.90354	1.46167	['Q9HAF1']	MEAF6
975	sp|P25398|RS12_HUMAN	6	4	-4.95827	0.010314	1.2282	0.837647	0.0345455	0.552136	1.46161	['P25398']	RPS12
4090	sp|Q9Y4W2|LAS1L_HUMAN	11	4	-13.4673	0.0103892	1.18332	0.840966	0.0347696	0.492721	1.4588	['Q9Y4W2']	LAS1L
173	sp|O15460|P4HA2_HUMAN	12	5	-6.0393	0.0104314	0.447739	0.300426	0.0348828	0.575647	1.45739	['O15460']	P4HA2
2157	sp|Q15643|TRIPB_HUMAN	5	2	-10.5342	0.0104435	0.596435	0.355734	0.0348954	0.745564	1.45723	['Q15643']	TRIP11
2301	sp|Q5BJH7|YIF1B_HUMAN	2	2	#NAME?	0.0104529	0.722844	0.441061	0.0348989	0.712706	1.45719	['Q5BJH7']	YIF1B
3032	sp|Q96EK6|GNA1_HUMAN	2	2	#NAME?	0.0104715	0.241737	0.610865	0.0349328	-1.33742	1.45677	['Q96EK6']	GNPNAT1
688	sp|P09496|CLCA_HUMAN	5	3	-5.15225	0.0104881	1.00372	0.65693	0.0349602	0.611543	1.45643	['P09496']	CLTA
3964	sp|Q9UPT6|JIP3_HUMAN	2	2	#NAME?	0.0105698	0.483029	0.413288	0.0352044	0.224961	1.4534	['Q9UPT6']	MAPK8IP3
2778	sp|Q8NG08|HELB_HUMAN	2	2	#NAME?	0.0106507	0.535838	0.427185	0.0354456	0.326936	1.45044	['Q8NG08']	HELB
85	sp|O14497|ARI1A_HUMAN	25	8	-3.20628	0.0106612	0.707772	0.500913	0.0354525	0.498724	1.45035	['O14497']	ARID1A
776	sp|P13196|HEM1_HUMAN	2	2	#NAME?	0.0106741	0.671415	0.450797	0.0354668	0.574724	1.45018	['P13196']	ALAS1
4061	sp|Q9Y3D7|TIM16_HUMAN	4	3	#NAME?	0.0107204	0.52401	0.559935	0.0355924	-0.0956634	1.44864	['Q9Y3D7']	PAM16
1574	sp|P62244|RS15A_HUMAN	6	4	-1.85047	0.0108089	0.217763	1.06083	0.0358578	-2.28436	1.44542	['P62244']	RPS15A
4034	sp|Q9Y305|ACOT9_HUMAN	5	4	-10.3828	0.0108928	1.05649	0.65978	0.0361074	0.679228	1.4424	['Q9Y305']	ACOT9
1201	sp|P41236|IPP2_HUMAN	2	2	#NAME?	0.0109645	0.547234	0.63665	0.0363161	-0.218341	1.4399	['P41236']	PPP1R2
676	sp|P09012|SNRPA_HUMAN	8	3	-3.06176	0.0109859	0.448083	0.941043	0.036358	-1.07049	1.4394	['P09012']	SNRPA
3892	sp|Q9UKE5|TNIK_HUMAN	2	2	#NAME?	0.0109992	0.449562	0.569816	0.0363731	-0.341976	1.43922	['Q9UKE5']	TNIK
2994	sp|Q96BH1|RNF25_HUMAN	2	2	#NAME?	0.0110138	0.665837	0.340476	0.0363928	0.967616	1.43899	['Q96BH1']	RNF25
837	sp|P16435|NCPR_HUMAN	12	8	-16.2343	0.0110485	0.651698	0.558006	0.0364784	0.223924	1.43796	['P16435']	POR
2558	sp|Q86SF2|GALT7_HUMAN	8	4	-15.0346	0.011076	0.418433	0.440859	0.0365402	-0.0753234	1.43723	['Q86SF2']	GALNT7
3446	sp|Q9H330|TM245_HUMAN	3	2	#NAME?	0.0111095	1.04538	0.65683	0.0366217	0.670431	1.43626	['Q9H330']	TMEM245
3322	sp|Q9BW27|NUP85_HUMAN	12	12	#NAME?	0.0111285	0.567492	0.570989	0.0366553	-0.00886166	1.43586	['Q9BW27']	NUP85
731	sp|P11171|41_HUMAN	4	2	#NAME?	0.0111722	0.672278	0.368212	0.0367703	0.868522	1.4345	['P11171']	EPB41
3996	sp|Q9Y285|SYFA_HUMAN	13	7	#NAME?	0.0112194	0.393085	0.58607	0.0368967	-0.576233	1.43301	['Q9Y285']	FARSA
2627	sp|Q8IWS0|PHF6_HUMAN	4	3	-16.0653	0.0113089	0.46043	0.602476	0.0371616	-0.387924	1.42991	['Q8IWS0']	PHF6
320	sp|O75175|CNOT3_HUMAN	4	2	#NAME?	0.0113289	0.375045	0.583104	0.0371979	-0.636689	1.42948	['O75175']	CNOT3
1532	sp|P61163|ACTZ_HUMAN	7	4	-66.8318	0.0113523	0.448807	1.05161	0.0372457	-1.22843	1.42892	['P61163']	ACTR1A
661	sp|P08559|ODPA_HUMAN	17	6	-4.0268	0.011371	1.09988	0.912994	0.0372753	0.268664	1.42858	['P08559']	PDHA1
1307	sp|P49406|RM19_HUMAN	6	4	-15.9822	0.0113793	0.413485	0.402582	0.0372753	0.0385548	1.42858	['P49406']	MRPL19
3546	sp|Q9HCD6|TANC2_HUMAN	2	2	#NAME?	0.0114027	0.454721	0.473005	0.0373229	-0.0568721	1.42802	['Q9HCD6']	TANC2
716	sp|P10412|H14_HUMAN	11	6	-1.00589	0.0114157	0.37255	0.928944	0.0373359	-1.31816	1.42787	['P10412']	HIST1H1E
1349	sp|P50402|EMD_HUMAN	10	6	-4.44657	0.0114408	1.06518	0.941616	0.0373889	0.177892	1.42726	['P50402']	EMD
897	sp|P20290|BTF3_HUMAN	7	3	-14.289	0.0115912	0.39179	0.753943	0.0378505	-0.944375	1.42193	['P20290']	BTF3
709	sp|P0CG41|CTGE8_HUMAN;sp|Q8IX94|CTGE4_HUMAN	2	2	#NAME?	0.0116379	0.549726	0.472256	0.0379589	0.219144	1.42069	['P0CG41', 'Q8IX94']	CTAGE8
942	sp|P22830|HEMH_HUMAN	4	2	#NAME?	0.0116426	0.645052	0.345256	0.0379589	0.90175	1.42069	['P22830']	FECH
1328	sp|P49750|YLPM1_HUMAN	35	15	-7.60644	0.0116984	0.525624	0.456585	0.0381113	0.203149	1.41895	['P49750']	YLPM1
3052	sp|Q96FF9|CDCA5_HUMAN	2	2	#NAME?	0.0117369	0.571799	0.32573	0.0382067	0.811831	1.41786	['Q96FF9']	CDCA5
1324	sp|P49720|PSB3_HUMAN	4	2	-3.93046	0.0117519	0.809724	1.18122	0.0382259	-0.544782	1.41764	['P49720']	PSMB3
3802	sp|Q9UBG0|MRC2_HUMAN	8	3	-14.6195	0.0118492	0.657795	0.40534	0.0385121	0.698506	1.4144	['Q9UBG0']	MRC2
2657	sp|Q8IYB3|SRRM1_HUMAN	8	5	-6.26896	0.0118767	1.10531	0.554008	0.0385717	0.996466	1.41373	['Q8IYB3']	SRRM1
2344	sp|Q5T6V5|CI064_HUMAN	2	2	#NAME?	0.0119359	0.462615	0.364352	0.0387336	0.344481	1.41191	['Q5T6V5']	C9orf64
3899	sp|Q9UKM7|MA1B1_HUMAN	2	2	#NAME?	0.0120886	0.514482	0.446191	0.0391987	0.205459	1.40673	['Q9UKM7']	MAN1B1
3172	sp|Q96T58|MINT_HUMAN	7	4	#NAME?	0.0121397	0.547695	0.304376	0.0393263	0.847518	1.40532	['Q96T58']	SPEN
1154	sp|P36776|LONM_HUMAN	26	11	-10.1117	0.0121556	1.09229	0.919305	0.0393263	0.248735	1.40532	['P36776']	LONP1
3845	sp|Q9UHB7|AFF4_HUMAN	5	2	-16.4079	0.0121563	1.06995	0.625066	0.0393263	0.775465	1.40532	['Q9UHB7']	AFF4
3123	sp|Q96N64|PWP2A_HUMAN	3	3	-38.328	0.012197	0.656557	0.461663	0.0394277	0.50808	1.4042	['Q96N64']	PWWP2A
466	sp|O95340|PAPS2_HUMAN	6	3	-15.0935	0.0122132	0.134137	0.273023	0.0394492	-1.02531	1.40396	['O95340']	PAPSS2
1066	sp|P30626|SORCN_HUMAN	4	2	-6.76736	0.0122519	0.328299	0.698774	0.0395437	-1.08982	1.40292	['P30626']	SRI
3655	sp|Q9NUQ8|ABCF3_HUMAN	3	3	-8.82575	0.0122648	0.357416	0.444579	0.0395546	-0.314837	1.4028	['Q9NUQ8']	ABCF3
1793	sp|Q04837|SSBP_HUMAN	3	3	-10.2215	0.0122759	0.425388	0.245876	0.0395562	0.79085	1.40279	['Q04837']	SSBP1
2843	sp|Q8WUW1|BRK1_HUMAN	3	3	#NAME?	0.0122842	0.42087	0.570643	0.0395562	-0.439213	1.40279	['Q8WUW1']	BRK1
4143	sp|Q9Y6C2|EMIL1_HUMAN	8	2	-7.27456	0.0122988	0.439166	0.238573	0.0395675	0.880335	1.40266	['Q9Y6C2']	EMILIN1
2821	sp|Q8TEM1|PO210_HUMAN	25	8	-12.4216	0.012313	0.421627	0.484091	0.0395675	-0.199311	1.40266	['Q8TEM1']	NUP210
2996	sp|Q96BK5|PINX1_HUMAN	4	2	-7.18926	0.0123162	1.10509	0.576288	0.0395675	0.939302	1.40266	['Q96BK5']	PINX1
3235	sp|Q99996|AKAP9_HUMAN	3	3	#NAME?	0.0123513	0.510278	0.549886	0.0396491	-0.107849	1.40177	['Q99996']	AKAP9
2159	sp|Q15646|OASL_HUMAN	2	2	#NAME?	0.0123606	0.6365	0.366435	0.0396491	0.796604	1.40177	['Q15646']	OASL
2669	sp|Q8IZY2|ABCA7_HUMAN	3	3	#NAME?	0.0124077	0.259911	0.377508	0.0397694	-0.53849	1.40045	['Q8IZY2']	ABCA7
3240	sp|Q9BQ39|DDX50_HUMAN	16	5	-7.83145	0.0124434	1.02927	0.976353	0.0398004	0.0761437	1.40011	['Q9BQ39']	DDX50
1730	sp|Q00688|FKBP3_HUMAN	6	4	#NAME?	0.0124438	0.375487	1.1221	0.0398004	-1.57936	1.40011	['Q00688']	FKBP3
850	sp|P17535|JUND_HUMAN	3	3	-15.472	0.0124543	0.68965	0.495737	0.0398004	0.47629	1.40011	['P17535']	JUND
2385	sp|Q66K74|MAP1S_HUMAN	5	3	1.5309	0.0124555	0.294959	0.224153	0.0398004	0.39603	1.40011	['Q66K74']	MAP1S
607	sp|P06703|S10A6_HUMAN	2	2	#NAME?	0.0124879	0.697934	1.49868	0.039873	-1.10253	1.39932	['P06703']	S100A6
1224	sp|P42892|ECE1_HUMAN	6	3	-9.88628	0.0124974	0.365797	0.20593	0.039873	0.828888	1.39932	['P42892']	ECE1
2970	sp|Q969T9|WBP2_HUMAN	3	3	#NAME?	0.012508	0.448402	0.570381	0.0398763	-0.347134	1.39929	['Q969T9']	WBP2
2073	sp|Q14997|PSME4_HUMAN	3	3	#NAME?	0.0125203	0.282138	0.352426	0.0398852	-0.320919	1.39919	['Q14997']	PSME4
1366	sp|P50995|ANX11_HUMAN	11	3	-9.13507	0.0125407	0.277266	0.383498	0.0399196	-0.467946	1.39881	['P50995']	ANXA11
4116	sp|Q9Y5Q9|TF3C3_HUMAN	6	3	-7.16679	0.0125943	0.529134	0.326634	0.0400596	0.695959	1.39729	['Q9Y5Q9']	GTF3C3
2018	sp|Q14202|ZMYM3_HUMAN	3	3	-24.1901	0.0126128	0.491321	0.391488	0.0400757	0.327698	1.39712	['Q14202']	ZMYM3
1312	sp|P49454|CENPF_HUMAN	9	3	-7.70414	0.0126186	0.34396	0.177724	0.0400757	0.9526	1.39712	['P49454']	CENPF
1367	sp|P51003|PAPOA_HUMAN	8	3	-6.90404	0.0126289	0.220927	0.452719	0.0400781	-1.03505	1.39709	['P51003']	PAPOLA
3174	sp|Q96T88|UHRF1_HUMAN	12	5	-1.58947	0.0126596	0.815555	0.590777	0.0401359	0.465168	1.39647	['Q96T88']	UHRF1
3120	sp|Q96MG7|MAGG1_HUMAN	6	3	#NAME?	0.0126664	0.449072	0.357633	0.0401359	0.328469	1.39647	['Q96MG7']	NDNL2
3451	sp|Q9H3P2|NELFA_HUMAN	4	3	-17.9229	0.0126945	0.426939	0.359897	0.0401944	0.246443	1.39583	['Q9H3P2']	NELFA
2963	sp|Q969P6|TOP1M_HUMAN	5	3	-6.11385	0.0128516	1.0419	0.791801	0.0406564	0.396012	1.39087	['Q969P6']	TOP1MT
175	sp|O15504|NUPL2_HUMAN	2	2	#NAME?	0.0128599	0.429106	0.435738	0.0406564	-0.0221251	1.39087	['O15504']	NUPL2
3110	sp|Q96KP1|EXOC2_HUMAN	2	2	#NAME?	0.0128932	0.276353	0.265487	0.0406757	0.05787	1.39067	['Q96KP1']	EXOC2
1	sp|A0FGR8|ESYT2_HUMAN	2	2	#NAME?	0.0128947	0.451659	0.406243	0.0406757	0.152892	1.39067	['A0FGR8']	ESYT2
1499	sp|P58546|MTPN_HUMAN	2	2	#NAME?	0.0128992	1.00152	0.998398	0.0406757	0.00449863	1.39067	['P58546']	MTPN
2371	sp|Q5VW36|FOCAD_HUMAN	3	2	#NAME?	0.012905	0.374096	0.496445	0.0406757	-0.408225	1.39067	['Q5VW36']	FOCAD
3650	sp|Q9NUL7|DDX28_HUMAN	2	2	#NAME?	0.0129748	0.424991	0.470002	0.0408647	-0.145235	1.38865	['Q9NUL7']	DDX28
2014	sp|Q14166|TTL12_HUMAN	7	3	-2.90042	0.0130277	0.161956	0.299723	0.0409792	-0.888029	1.38744	['Q14166']	TTLL12
3282	sp|Q9BTE3|MCMBP_HUMAN	6	3	-9.59075	0.0130308	0.419935	0.623237	0.0409792	-0.569616	1.38744	['Q9BTE3']	MCMBP
3596	sp|Q9NQW6|ANLN_HUMAN	11	4	-8.47839	0.0130632	0.612444	0.505549	0.0410502	0.276728	1.38668	['Q9NQW6']	ANLN
3543	sp|Q9HC52|CBX8_HUMAN	3	2	#NAME?	0.0130842	0.509587	0.404483	0.0410852	0.333248	1.38631	['Q9HC52']	CBX8
117	sp|O14908|GIPC1_HUMAN	7	4	#NAME?	0.0131789	0.580656	1.02096	0.0413117	-0.814166	1.38393	['O14908']	GIPC1
1203	sp|P41250|SYG_HUMAN	20	7	-1.79435	0.0131829	0.6014	0.478409	0.0413117	0.330082	1.38393	['P41250']	GARS
3547	sp|Q9HCE1|MOV10_HUMAN	6	3	-14.2504	0.0131861	0.538655	0.330763	0.0413117	0.703563	1.38393	['Q9HCE1']	MOV10
3434	sp|Q9H299|SH3L3_HUMAN	3	2	#NAME?	0.0132643	0.733751	1.31678	0.0415257	-0.843648	1.38168	['Q9H299']	SH3BGRL3
723	sp|P10644|KAP0_HUMAN	10	6	-14.2793	0.0132989	0.467353	0.652658	0.0415856	-0.481815	1.38106	['P10644']	PRKAR1A
1845	sp|Q0ZGT2|NEXN_HUMAN	17	6	-4.33082	0.0133034	0.935862	0.621433	0.0415856	0.590697	1.38106	['Q0ZGT2']	NEXN
642	sp|P07942|LAMB1_HUMAN	30	16	-2.74228	0.0134488	0.60644	0.459206	0.0420085	0.401223	1.37666	['P07942']	LAMB1
3460	sp|Q9H446|RWDD1_HUMAN	2	2	#NAME?	0.013469	0.977762	1.02153	0.0420402	-0.0631813	1.37633	['Q9H446']	RWDD1
2160	sp|Q15650|TRIP4_HUMAN	3	3	-3.31009	0.0136487	0.30647	0.402914	0.0425648	-0.394724	1.37095	['Q15650']	TRIP4
2408	sp|Q6GPH4|XAF1_HUMAN	3	3	#NAME?	0.0136575	0.391416	0.398554	0.0425648	-0.0260738	1.37095	['Q6GPH4']	XAF1
3854	sp|Q9UHQ9|NB5R1_HUMAN	5	3	#NAME?	0.0137	0.307531	1.0119	0.0426579	-1.71826	1.37	['Q9UHQ9']	CYB5R1
3838	sp|Q9UH17|ABC3B_HUMAN	4	3	-9.44591	0.0137078	0.455632	0.357095	0.0426579	0.351564	1.37	['Q9UH17']	APOBEC3B
4150	sp|Q9Y6G3|RM42_HUMAN	3	3	#NAME?	0.0138102	0.405299	0.421097	0.0429444	-0.0551651	1.36709	['Q9Y6G3']	MRPL42
813	sp|P15151|PVR_HUMAN	6	3	#NAME?	0.0138248	0.347897	0.269781	0.0429578	0.366871	1.36696	['P15151']	PVR
253	sp|O60232|SSA27_HUMAN	2	2	#NAME?	0.0138682	0.332629	0.261239	0.0430606	0.348541	1.36592	['O60232']	SSSCA1
1891	sp|Q13057|COASY_HUMAN	3	3	#NAME?	0.0138949	0.45462	0.522679	0.0431114	-0.201264	1.36541	['Q13057']	COASY
4107	sp|Q9Y5J9|TIM8B_HUMAN	2	2	#NAME?	0.0139398	0.395404	0.643273	0.0431979	-0.702101	1.36454	['Q9Y5J9']	TIMM8B
3735	sp|Q9NZJ7|MTCH1_HUMAN	3	3	#NAME?	0.0139435	0.66695	0.585898	0.0431979	0.18693	1.36454	['Q9NZJ7']	MTCH1
867	sp|P18077|RL35A_HUMAN	6	2	2.56483	0.0140144	0.88433	1.12386	0.0433854	-0.345807	1.36266	['P18077']	RPL35A
264	sp|O60343|TBCD4_HUMAN	2	2	#NAME?	0.0142065	0.54638	0.748214	0.0439473	-0.453546	1.35707	['O60343']	TBC1D4
3632	sp|Q9NS91|RAD18_HUMAN	3	3	#NAME?	0.0142457	0.434187	0.563702	0.0440361	-0.376616	1.35619	['Q9NS91']	RAD18
1925	sp|Q13363|CTBP1_HUMAN	4	2	#NAME?	0.0143587	0.328133	1.03907	0.0443524	-1.66295	1.35308	['Q13363']	CTBP1
2168	sp|Q15785|TOM34_HUMAN	12	8	-8.45261	0.014419	0.498538	0.49945	0.0445058	-0.00263709	1.35158	['Q15785']	TOMM34
2683	sp|Q8N3R9|MPP5_HUMAN	4	2	#NAME?	0.0145464	0.359537	0.60949	0.0448656	-0.761463	1.34809	['Q8N3R9']	MPP5
4164	sp|Q9Y6R7|FCGBP_HUMAN	2	2	#NAME?	0.0145698	0.644512	0.390297	0.0449047	0.723633	1.34771	['Q9Y6R7']	FCGBP
2767	sp|Q8NEZ5|FBX22_HUMAN	4	2	#NAME?	0.0146744	0.516041	0.53492	0.0451937	-0.051838	1.34492	['Q8NEZ5']	FBXO22
2705	sp|Q8N6T3|ARFG1_HUMAN	5	3	-8.73554	0.0147309	0.339986	0.516615	0.0452818	-0.603612	1.34408	['Q8N6T3']	ARFGAP1
3816	sp|Q9UBV8|PEF1_HUMAN	3	2	-10.8185	0.014751	0.377431	0.655663	0.0452818	-0.796742	1.34408	['Q9UBV8']	PEF1
2426	sp|Q6NXT2|H3C_HUMAN	5	3	-1.44807	0.0147517	0.935433	1.06902	0.0452818	-0.192588	1.34408	['Q6NXT2']	H3F3C
1661	sp|P68431|H31_HUMAN;sp|Q16695|H31T_HUMAN;sp|Q71DI3|H32_HUMAN	9	3	8.21528	0.0147517	0.937414	1.06676	0.0452818	-0.186485	1.34408	['P68431', 'Q16695', 'Q71DI3']	HIST1H3A
1977	sp|Q13685|AAMP_HUMAN	2	2	#NAME?	0.0147573	0.414411	0.343125	0.0452818	0.272328	1.34408	['Q13685']	AAMP
1609	sp|P62854|RS26_HUMAN	4	3	-4.30131	0.0148555	0.718199	1.37416	0.0455496	-0.93609	1.34152	['P62854']	RPS26
47	sp|O00264|PGRC1_HUMAN	10	6	-1.80929	0.0149306	0.880714	1.13578	0.0457461	-0.366943	1.33965	['O00264']	PGRMC1
681	sp|P09234|RU1C_HUMAN	2	2	#NAME?	0.01495	0.986344	1.01385	0.045772	-0.0396753	1.3394	['P09234']	SNRPC
2895	sp|Q92542|NICA_HUMAN	5	3	-8.85891	0.0149865	0.615965	0.491232	0.045828	0.326444	1.33887	['Q92542']	NCSTN
2979	sp|Q96A49|SYAP1_HUMAN	4	3	#NAME?	0.0149903	0.580513	0.491514	0.045828	0.240095	1.33887	['Q96A49']	SYAP1
83	sp|O00762|UBE2C_HUMAN	2	2	#NAME?	0.0151233	0.490194	0.445742	0.0462009	0.137143	1.33535	['O00762']	UBE2C
965	sp|P24752|THIL_HUMAN	14	6	-3.26746	0.0151396	0.958051	1.04563	0.0462168	-0.126196	1.3352	['P24752']	ACAT1
1817	sp|Q07666|KHDR1_HUMAN	16	8	-7.48606	0.0151581	0.98408	1.01628	0.0462395	-0.0464544	1.33499	['Q07666']	KHDRBS1
2188	sp|Q16512|PKN1_HUMAN	3	3	#NAME?	0.0152078	0.442561	0.439219	0.046357	0.0109385	1.33388	['Q16512']	PKN1
2554	sp|Q7Z7C8|TAF8_HUMAN	2	2	#NAME?	0.0152272	0.596637	0.394979	0.0463825	0.595076	1.33365	['Q7Z7C8']	TAF8
1932	sp|Q13423|NNTM_HUMAN	24	11	-5.19247	0.015279	0.561768	0.672088	0.0465062	-0.258676	1.33249	['Q13423']	NNT
197	sp|O43324|MCA3_HUMAN	9	4	-10.1225	0.0153515	0.386735	0.469913	0.0466928	-0.281046	1.33075	['O43324']	EEF1E1
1296	sp|P48960|CD97_HUMAN	4	3	-14.3218	0.015378	0.771879	0.481381	0.0467392	0.681196	1.33032	['P48960']	CD97
717	sp|P10515|ODP2_HUMAN	16	6	-10.9445	0.0154525	1.07381	0.353671	0.0469307	1.60226	1.32854	['P10515']	DLAT
540	sp|P01137|TGFB1_HUMAN	4	2	#NAME?	0.0154635	0.430629	0.245569	0.0469307	0.810321	1.32854	['P01137']	TGFB1
3119	sp|Q96MF7|NSE2_HUMAN	2	2	#NAME?	0.0155603	0.630263	0.400859	0.04719	0.652858	1.32615	['Q96MF7']	NSMCE2
1682	sp|P78536|ADA17_HUMAN	2	2	-1.69758	0.0155813	0.609738	0.255577	0.0472195	1.25443	1.32588	['P78536']	ADAM17
1803	sp|Q06124|PTN11_HUMAN	6	3	-9.24128	0.0156057	0.44863	0.680552	0.047259	-0.60118	1.32552	['Q06124']	PTPN11
3405	sp|Q9H074|PAIP1_HUMAN	9	3	-10.4478	0.0159837	0.423331	0.446846	0.0483686	-0.0779897	1.31544	['Q9H074']	PAIP1
36	sp|O00170|AIP_HUMAN	12	6	4.51566	0.0160862	0.914808	1.08145	0.0486436	-0.241419	1.31297	['O00170']	AIP
2436	sp|Q6P1M0|S27A4_HUMAN	3	2	#NAME?	0.0161029	0.507124	0.475893	0.0486588	0.0916993	1.31284	['Q6P1M0']	SLC27A4
486	sp|O95602|RPA1_HUMAN	18	13	-85.8196	0.016145	0.327983	0.261218	0.0487506	0.328366	1.31202	['O95602']	POLR1A
180	sp|O15551|CLD3_HUMAN	2	2	#NAME?	0.0161716	0.432009	0.612348	0.0487957	-0.503291	1.31162	['O15551']	CLDN3
77	sp|O00571|DDX3X_HUMAN	31	10	-8.90179	0.0162639	0.880661	1.12691	0.0490309	-0.355713	1.30953	['O00571']	DDX3X
133	sp|O15031|PLXB2_HUMAN	21	9	-5.45612	0.0162731	0.619856	0.459359	0.0490309	0.432311	1.30953	['O15031']	PLXNB2
1788	sp|Q04446|GLGB_HUMAN	7	3	-6.65618	0.0163664	0.395737	0.503781	0.0492763	-0.348253	1.30736	['Q04446']	GBE1
2852	sp|Q8WVV9|HNRLL_HUMAN	11	5	-12.7278	0.0164018	0.336911	0.594517	0.0493474	-0.81935	1.30674	['Q8WVV9']	HNRNPLL
2839	sp|Q8WUH6|TM263_HUMAN	3	2	#NAME?	0.0164894	0.344143	0.389982	0.0495752	-0.180397	1.30474	['Q8WUH6']	TMEM263
614	sp|P06753|TPM3_HUMAN	20	8	-8.18337	0.0165047	0.100978	0.297282	0.0495855	-1.55779	1.30465	['P06753']	TPM3
2034	sp|Q14444|CAPR1_HUMAN	15	6	-5.29792	0.0165763	0.203944	0.409401	0.0497647	-1.00534	1.30308	['Q14444']	CAPRIN1
2976	sp|Q96A26|F162A_HUMAN	3	2	#NAME?	0.0166183	0.988528	0.482716	0.0498548	1.03411	1.30229	['Q96A26']	FAM162A
4132	sp|Q9Y639|NPTN_HUMAN	7	4	#NAME?	0.0166845	1.1043	0.89392	0.0500175	0.304921	1.30088	['Q9Y639']	NPTN
1747	sp|Q01780|EXOSX_HUMAN	17	5	-8.8561	0.0169403	0.652444	0.604286	0.0507477	0.110622	1.29458	['Q01780']	EXOSC10
793	sp|P13995|MTDC_HUMAN	6	4	-5.73636	0.0170382	0.529881	0.91369	0.0510047	-0.786037	1.29239	['P13995']	MTHFD2
169	sp|O15400|STX7_HUMAN	5	3	-9.20521	0.0171464	0.720882	1.05448	0.05128	-0.548693	1.29005	['O15400']	STX7
2897	sp|Q92552|RT27_HUMAN	13	7	-2.85742	0.0171548	0.611536	0.454631	0.05128	0.427743	1.29005	['Q92552']	MRPS27
100	sp|O14656|TOR1A_HUMAN	2	2	-2.21899	0.0172093	0.590205	0.390706	0.0514061	0.595133	1.28899	['O14656']	TOR1A
3511	sp|Q9H9A6|LRC40_HUMAN	2	2	#NAME?	0.0173343	0.468601	0.489968	0.0517422	-0.0643275	1.28615	['Q9H9A6']	LRRC40
1779	sp|Q03164|KMT2A_HUMAN	48	13	-17.8143	0.0173762	0.500735	0.483922	0.0518302	0.0492717	1.28542	['Q03164']	KMT2A
1505	sp|P60510|PP4C_HUMAN	5	2	#NAME?	0.0173956	0.496025	1.02088	0.051851	-1.04133	1.28524	['P60510']	PPP4C
791	sp|P13984|T2FB_HUMAN	4	2	#NAME?	0.0174158	0.362588	0.629445	0.0518742	-0.795748	1.28505	['P13984']	GTF2F2
3190	sp|Q99497|PARK7_HUMAN	9	7	-6.55843	0.0174832	1.00199	0.998055	0.0520378	0.0056753	1.28368	['Q99497']	PARK7
319	sp|O75165|DJC13_HUMAN	8	2	5.0504	0.0175669	0.261416	0.476114	0.0522497	-0.86496	1.28192	['O75165']	DNAJC13
1940	sp|Q13445|TMED1_HUMAN	3	2	#NAME?	0.0176941	0.247262	0.30463	0.0525904	-0.301015	1.27909	['Q13445']	TMED1
1157	sp|P36915|GNL1_HUMAN	4	2	#NAME?	0.0177286	0.293368	0.51543	0.0526555	-0.813064	1.27856	['P36915']	GNL1
3377	sp|Q9BZK7|TBL1R_HUMAN	4	2	-23.0044	0.017782	0.789774	0.506528	0.0527765	0.640799	1.27756	['Q9BZK7']	TBL1XR1
290	sp|O60784|TOM1_HUMAN	2	2	#NAME?	0.0178211	0.618673	0.989021	0.052855	-0.676825	1.27691	['O60784']	TOM1
3027	sp|Q96E39|RMXL1_HUMAN	13	7	2.76184	0.0178551	1.0787	0.928175	0.052918	0.216828	1.2764	['Q96E39']	RBMXL1
419	sp|O94842|TOX4_HUMAN	4	3	#NAME?	0.0178693	1.04153	0.600405	0.052921	0.794699	1.27637	['O94842']	TOX4
3439	sp|Q9H2M9|RBGPR_HUMAN	10	6	-10.7404	0.0178814	0.317102	0.504036	0.052921	-0.66858	1.27637	['Q9H2M9']	RAB3GAP2
3645	sp|Q9NTZ6|RBM12_HUMAN	9	4	-17.7632	0.0178952	0.420286	0.638324	0.052924	-0.602918	1.27635	['Q9NTZ6']	RBM12
3133	sp|Q96PU4|UHRF2_HUMAN	6	3	#NAME?	0.0179087	0.455729	0.7272	0.0529266	-0.674177	1.27633	['Q96PU4']	UHRF2
1284	sp|P48509|CD151_HUMAN	3	3	-7.77151	0.0179249	0.506746	0.321283	0.0529369	0.657418	1.27624	['P48509']	CD151
3487	sp|Q9H788|SH24A_HUMAN	2	2	-8.01175	0.017975	0.545868	0.563114	0.0530474	-0.0448736	1.27534	['Q9H788']	SH2D4A
459	sp|O95260|ATE1_HUMAN	2	2	#NAME?	0.0179878	0.415829	0.741746	0.0530474	-0.834934	1.27534	['O95260']	ATE1
979	sp|P25705|ATPA_HUMAN	23	9	-5.46567	0.0180173	0.897361	1.10874	0.0530969	-0.305166	1.27493	['P25705']	ATP5A1
945	sp|P23229|ITA6_HUMAN	7	3	#NAME?	0.0181108	0.292076	0.287412	0.0533348	0.023222	1.27299	['P23229']	ITGA6
2410	sp|Q6IAA8|LTOR1_HUMAN	3	3	#NAME?	0.0181535	0.992383	0.557778	0.0534092	0.831206	1.27238	['Q6IAA8']	LAMTOR1
2642	sp|Q8IXM2|BAP18_HUMAN	4	2	-4.18204	0.0181617	1.0695	0.57329	0.0534092	0.899602	1.27238	['Q8IXM2']	BAP18
337	sp|O75368|SH3L1_HUMAN	2	2	-3.3838	0.0184016	1.13613	0.444889	0.0540475	1.35261	1.26722	['O75368']	SH3BGRL
3309	sp|Q9BVC5|ASHWN_HUMAN	2	2	#NAME?	0.0184047	0.586233	0.55202	0.0540475	0.0867537	1.26722	['Q9BVC5']	C2orf49
447	sp|O95182|NDUA7_HUMAN	4	3	#NAME?	0.018427	0.462912	0.32578	0.0540751	0.506837	1.267	['O95182']	NDUFA7
3205	sp|Q99613|EIF3C_HUMAN	20	10	-13.3255	0.018446	0.122702	0.356595	0.0540927	-1.53913	1.26686	['Q99613']	EIF3C
3340	sp|Q9BXK5|B2L13_HUMAN	4	2	#NAME?	0.0184872	0.554616	0.349373	0.0541754	0.666723	1.2662	['Q9BXK5']	BCL2L13
1176	sp|P39060|COIA1_HUMAN	18	8	-6.65428	0.0185511	0.542466	1.01527	0.0543246	-0.90426	1.265	['P39060']	COL18A1
1419	sp|P52888|THOP1_HUMAN	5	2	#NAME?	0.0186209	0.0961708	0.23602	0.0544905	-1.29524	1.26368	['P52888']	THOP1
1825	sp|Q08170|SRSF4_HUMAN	10	4	#NAME?	0.0187663	0.981004	0.284971	0.0548776	1.78345	1.2606	['Q08170']	SRSF4
1409	sp|P52630|STAT2_HUMAN	2	2	#NAME?	0.0188332	0.490252	0.46889	0.0550347	0.0642752	1.25936	['P52630']	STAT2
1458	sp|P55010|IF5_HUMAN	14	4	#NAME?	0.0188719	0.869094	1.15102	0.0551091	-0.405327	1.25878	['P55010']	EIF5
449	sp|O95197|RTN3_HUMAN	4	3	-3.89389	0.0189195	0.659106	0.568119	0.0552094	0.214319	1.25799	['O95197']	RTN3
460	sp|O95292|VAPB_HUMAN	13	8	-1.47229	0.0189363	1.07024	0.925589	0.0552199	0.209489	1.2579	['O95292']	VAPB
3983	sp|Q9Y230|RUVB2_HUMAN	19	6	-2.84976	0.0190224	0.906594	1.10432	0.0554314	-0.284631	1.25624	['Q9Y230']	RUVBL2
4138	sp|Q9Y696|CLIC4_HUMAN	10	7	-18.0729	0.0190433	0.478804	0.957635	0.0554314	-1.00004	1.25624	['Q9Y696']	CLIC4
2494	sp|Q702N8|XIRP1_HUMAN	3	2	#NAME?	0.0190487	0.687966	0.464078	0.0554314	0.56797	1.25624	['Q702N8']	XIRP1
2457	sp|Q6PL18|ATAD2_HUMAN	8	4	-5.82294	0.0190772	0.351845	0.305269	0.0554756	0.204856	1.2559	['Q6PL18']	ATAD2
3266	sp|Q9BRT6|LLPH_HUMAN	2	2	-3.71766	0.0192621	0.367569	1.05984	0.0559741	-1.52777	1.25201	['Q9BRT6']	LLPH
3818	sp|Q9UBW8|CSN7A_HUMAN	3	2	-4.33254	0.0196901	0.600348	0.792915	0.0571781	-0.401366	1.24277	['Q9UBW8']	COPS7A
2348	sp|Q5T9A4|ATD3B_HUMAN	16	6	-5.33115	0.0197623	0.896826	1.13311	0.0573477	-0.337383	1.24148	['Q5T9A4']	ATAD3B
1301	sp|P49207|RL34_HUMAN	3	3	-2.72083	0.019862	0.630323	1.06426	0.0575971	-0.755684	1.2396	['P49207']	RPL34
3127	sp|Q96NH3|BROMI_HUMAN	2	2	#NAME?	0.0199397	0.542279	0.329601	0.0577822	0.718315	1.23821	['Q96NH3']	TBC1D32
1406	sp|P52566|GDIR2_HUMAN	2	2	#NAME?	0.0201695	0.981621	0.489201	0.0584074	1.00474	1.23353	['P52566']	ARHGDIB
266	sp|O60427|FADS1_HUMAN	6	3	-3.49044	0.0204586	0.589962	0.509681	0.0592035	0.211028	1.22765	['O60427']	FADS1
1070	sp|P30876|RPB2_HUMAN	25	13	-24.3492	0.0204796	0.307952	0.302222	0.0592231	0.0270979	1.22751	['P30876']	POLR2B
332	sp|O75340|PDCD6_HUMAN	7	4	-5.64457	0.0205268	0.908858	1.10377	0.0593186	-0.280316	1.22681	['O75340']	PDCD6
2127	sp|Q15334|L2GL1_HUMAN	9	4	#NAME?	0.0205997	0.388453	0.443541	0.059488	-0.191326	1.22557	['Q15334']	LLGL1
3664	sp|Q9NVF7|FBX28_HUMAN	2	2	#NAME?	0.0206397	0.677323	0.96959	0.0595624	-0.517531	1.22503	['Q9NVF7']	FBXO28
1944	sp|Q13472|TOP3A_HUMAN	3	2	#NAME?	0.0207447	0.341711	0.0692658	0.0598038	2.30256	1.22327	['Q13472']	TOP3A
2787	sp|Q8TAA3|PSA7L_HUMAN	4	4	-2.19578	0.020752	0.831719	1.1818	0.0598038	-0.506817	1.22327	['Q8TAA3']	PSMA8
2916	sp|Q92692|PVRL2_HUMAN	4	3	#NAME?	0.020863	0.56063	0.37073	0.0600819	0.596683	1.22126	['Q92692']	PVRL2
4022	sp|Q9Y2S6|TMA7_HUMAN	2	2	-15.1245	0.021029	0.360754	0.659165	0.0605182	-0.869623	1.21811	['Q9Y2S6']	TMA7
1930	sp|Q13416|ORC2_HUMAN	2	2	#NAME?	0.0211061	0.359484	0.381783	0.0606971	-0.0868235	1.21683	['Q13416']	ORC2
2776	sp|Q8NFQ8|TOIP2_HUMAN	10	2	#NAME?	0.0211203	0.956399	0.37088	0.0606971	1.36666	1.21683	['Q8NFQ8']	TOR1AIP2
4155	sp|Q9Y6J0|CABIN_HUMAN	2	2	#NAME?	0.0211886	0.49689	0.490505	0.0608516	0.0186592	1.21573	['Q9Y6J0']	CABIN1
2818	sp|Q8TEA8|DTD1_HUMAN	3	2	-13.8163	0.0212223	0.566047	1.06086	0.0609064	-0.906239	1.21534	['Q8TEA8']	DTD1
1283	sp|P48454|PP2BC_HUMAN	3	2	#NAME?	0.0213327	0.533537	0.718003	0.0611812	-0.428403	1.21338	['P48454']	PPP3CC
2063	sp|Q14789|GOGB1_HUMAN	23	15	-12.7833	0.0216156	0.401554	0.368686	0.0619435	0.123201	1.208	['Q14789']	GOLGB1
3285	sp|Q9BTT6|LRRC1_HUMAN	3	3	#NAME?	0.0216282	0.571746	0.537216	0.0619435	0.0898722	1.208	['Q9BTT6']	LRRC1
3158	sp|Q96S66|CLCC1_HUMAN	6	2	-2.4616	0.0217047	1.12358	0.882598	0.0621199	0.348279	1.20677	['Q96S66']	CLCC1
1839	sp|Q09028|RBBP4_HUMAN	14	9	-2.67032	0.0217649	0.93236	1.06877	0.0622494	-0.196996	1.20586	['Q09028']	RBBP4
988	sp|P26358|DNMT1_HUMAN	16	10	#NAME?	0.021796	0.330118	0.333735	0.0622955	-0.0157184	1.20554	['P26358']	DNMT1
3169	sp|Q96SZ6|CK5P1_HUMAN	4	2	2.22855	0.0221725	0.631988	0.601052	0.0633064	0.0724064	1.19855	['Q96SZ6']	CDK5RAP1
1791	sp|Q04721|NOTC2_HUMAN	13	7	#NAME?	0.0221887	0.406176	0.306212	0.0633064	0.407577	1.19855	['Q04721']	NOTCH2
2413	sp|Q6IN85|P4R3A_HUMAN	10	6	#NAME?	0.0221952	0.400633	0.451124	0.0633064	-0.171241	1.19855	['Q6IN85']	SMEK1
1206	sp|P42025|ACTY_HUMAN	3	2	#NAME?	0.0222393	0.13075	0.535696	0.0633889	-2.0346	1.19799	['P42025']	ACTR1B
3399	sp|Q9GZU8|F192A_HUMAN	3	2	#NAME?	0.0224428	0.335673	0.403932	0.0639253	-0.267053	1.19433	['Q9GZU8']	FAM192A
2165	sp|Q15738|NSDHL_HUMAN	9	6	-11.7599	0.0225149	0.464257	0.648622	0.0640867	-0.482454	1.19323	['Q15738']	NSDHL
3456	sp|Q9H3Z4|DNJC5_HUMAN	5	3	-10.9022	0.0225653	0.655986	0.982321	0.0641865	-0.58253	1.19256	['Q9H3Z4']	DNAJC5
2809	sp|Q8TDB4|HUMMR_HUMAN	2	2	-6.98679	0.0226151	1.01576	0.660226	0.0642841	0.621533	1.1919	['Q8TDB4']	MGARP
964	sp|P24666|PPAC_HUMAN	4	2	2.09895	0.0227547	0.478053	1.02991	0.0646369	-1.10728	1.18952	['P24666']	ACP1
3872	sp|Q9UIJ7|KAD3_HUMAN	9	5	#NAME?	0.0228439	0.688948	0.548691	0.0648462	0.328402	1.18812	['Q9UIJ7']	AK3
627	sp|P07339|CATD_HUMAN	14	8	-5.34397	0.0229071	1.03269	0.970284	0.0649815	0.0899335	1.18721	['P07339']	CTSD
2805	sp|Q8TCT9|HM13_HUMAN	8	4	-8.79894	0.0229518	0.478569	0.348743	0.065064	0.456562	1.18666	['Q8TCT9']	HM13
159	sp|O15320|CTGE5_HUMAN	4	2	-12.3239	0.023013	0.566374	0.372741	0.0651929	0.603581	1.1858	['O15320']	CTAGE5
3290	sp|Q9BTY2|FUCO2_HUMAN	2	2	#NAME?	0.0231338	0.635651	0.387101	0.0654909	0.715525	1.18382	['Q9BTY2']	FUCA2
2062	sp|Q14764|MVP_HUMAN	5	3	#NAME?	0.0232193	0.637624	0.610822	0.065668	0.0619525	1.18265	['Q14764']	MVP
1158	sp|P36954|RPB9_HUMAN	3	2	#NAME?	0.0232279	0.502708	0.255905	0.065668	0.974111	1.18265	['P36954']	POLR2I
2544	sp|Q7Z5L9|I2BP2_HUMAN	5	2	#NAME?	0.0232514	0.62358	1.04793	0.0656901	-0.748892	1.1825	['Q7Z5L9']	IRF2BP2
3634	sp|Q9NSE4|SYIM_HUMAN	16	8	-17.3824	0.0233618	0.428416	0.44108	0.0659387	-0.0420269	1.18086	['Q9NSE4']	IARS2
2128	sp|Q15349|KS6A2_HUMAN	3	3	-5.63054	0.0233711	0.408137	0.621504	0.0659387	-0.606711	1.18086	['Q15349']	RPS6KA2
742	sp|P11387|TOP1_HUMAN	28	9	-4.58519	0.0234025	1.08191	0.913982	0.0659827	0.243349	1.18057	['P11387']	TOP1
1225	sp|P43007|SATT_HUMAN	4	2	-11.6216	0.0234203	0.539819	0.247311	0.0659883	1.12615	1.18053	['P43007']	SLC1A4
0	sp|A0AVT1|UBA6_HUMAN	10	3	4.87392	0.0234601	0.265811	0.398991	0.0660558	-0.585952	1.18009	['A0AVT1']	UBA6
3528	sp|Q9HAV4|XPO5_HUMAN	18	9	-3.14537	0.0235094	0.461372	0.64396	0.0661135	-0.48104	1.17971	['Q9HAV4']	XPO5
1150	sp|P36543|VATE1_HUMAN	7	4	-2.10505	0.0235123	0.220063	0.507967	0.0661135	-1.20682	1.17971	['P36543']	ATP6V1E1
3959	sp|Q9UPN3|MACF1_HUMAN	42	24	#NAME?	0.0237634	0.455131	0.513418	0.0667746	-0.173852	1.17539	['Q9UPN3']	MACF1
1654	sp|P68036|UB2L3_HUMAN	5	4	-2.91623	0.0238348	0.899469	1.11096	0.06693	-0.304663	1.17438	['P68036']	UBE2L3
1493	sp|P57053|H2BFS_HUMAN	8	4	-11.586	0.0238989	1.0189	0.981453	0.0670253	0.054018	1.17376	['P57053']	H2BFS
1521	sp|P61011|SRP54_HUMAN	9	4	-1.11883	0.0239009	0.224096	0.344078	0.0670253	-0.618622	1.17376	['P61011']	SRP54
2288	sp|Q53GQ0|DHB12_HUMAN	6	3	-60.6233	0.0239176	1.05153	0.955778	0.0670271	0.137745	1.17375	['Q53GQ0']	HSD17B12
926	sp|P21964|COMT_HUMAN	5	3	-6.18337	0.0240048	1.21718	0.802428	0.0672264	0.601095	1.17246	['P21964']	COMT
1575	sp|P62249|RS16_HUMAN	8	5	-2.66521	0.0240751	0.84158	1.15415	0.067378	-0.455656	1.17148	['P62249']	RPS16
3801	sp|Q9UBF8|PI4KB_HUMAN	2	2	#NAME?	0.0241352	0.51746	0.47835	0.0675009	0.113382	1.17069	['Q9UBF8']	PI4KB
107	sp|O14745|NHRF1_HUMAN	8	3	-4.59279	0.0243118	0.58529	1.06937	0.0679492	-0.869538	1.16782	['O14745']	SLC9A3R1
3537	sp|Q9HBI1|PARVB_HUMAN	3	3	2.08779	0.0244576	0.844053	1.17156	0.068311	-0.473025	1.16551	['Q9HBI1']	PARVB
2772	sp|Q8NFD5|ARI1B_HUMAN	5	3	#NAME?	0.0245634	0.62342	0.531297	0.0685604	0.230687	1.16393	['Q8NFD5']	ARID1B
2917	sp|Q92696|PGTA_HUMAN	3	2	#NAME?	0.024611	0.207379	0.398924	0.0686475	-0.943848	1.16338	['Q92696']	RABGGTA
3730	sp|Q9NZ45|CISD1_HUMAN	4	3	-6.03875	0.0247499	0.68843	0.419117	0.0689887	0.715956	1.16122	['Q9NZ45']	CISD1
3750	sp|Q9P016|THYN1_HUMAN	3	3	#NAME?	0.0248794	0.522725	0.620649	0.0693034	-0.247725	1.15925	['Q9P016']	THYN1
1389	sp|P51812|KS6A3_HUMAN	4	2	#NAME?	0.0249843	0.46572	0.428816	0.0695491	0.119103	1.15771	['P51812']	RPS6KA3
2731	sp|Q8NBQ5|DHB11_HUMAN	5	3	-13.7146	0.0251014	0.519832	0.559497	0.0698283	-0.106085	1.15597	['Q8NBQ5']	HSD17B11
1416	sp|P52789|HXK2_HUMAN	12	5	-8.16158	0.0251836	0.906182	1.10654	0.0700059	-0.288186	1.15487	['P52789']	HK2
1985	sp|Q13867|BLMH_HUMAN	3	2	#NAME?	0.0251988	0.512336	0.685952	0.0700059	-0.421017	1.15487	['Q13867']	BLMH
143	sp|O15145|ARPC3_HUMAN	4	2	#NAME?	0.0252444	0.791022	1.20628	0.070086	-0.608779	1.15437	['O15145']	ARPC3
2278	sp|Q4VCS5|AMOT_HUMAN	2	2	1.10576	0.0254552	0.452533	0.32044	0.0706003	0.497968	1.15119	['Q4VCS5']	AMOT
3485	sp|Q9H6Z4|RANB3_HUMAN	6	3	-22.1257	0.0254635	0.251802	0.23279	0.0706003	0.113263	1.15119	['Q9H6Z4']	RANBP3
2877	sp|Q8WY22|BRI3B_HUMAN	3	2	#NAME?	0.0255244	0.51014	0.470205	0.0707221	0.117602	1.15044	['Q8WY22']	BRI3BP
2849	sp|Q8WVJ2|NUDC2_HUMAN	2	2	#NAME?	0.0257223	0.893985	1.13437	0.0712232	-0.343566	1.14738	['Q8WVJ2']	NUDCD2
4038	sp|Q9Y371|SHLB1_HUMAN	2	2	#NAME?	0.0260271	0.386999	0.673095	0.0720194	-0.798481	1.14255	['Q9Y371']	SH3GLB1
418	sp|O94826|TOM70_HUMAN	19	6	5.0446	0.0261225	1.07535	0.919689	0.0722353	0.225594	1.14125	['O94826']	TOMM70A
901	sp|P20340|RAB6A_HUMAN	6	2	#NAME?	0.0261461	0.900654	0.56952	0.0722526	0.661225	1.14115	['P20340']	RAB6A
3515	sp|Q9H9F9|ARP5_HUMAN	2	2	0.684085	0.0262373	1.01289	0.536285	0.0724566	0.917403	1.13992	['Q9H9F9']	ACTR5
1004	sp|P27635|RL10_HUMAN	9	4	-2.13989	0.026622	0.845602	1.18793	0.0734703	-0.4904	1.13389	['P27635']	RPL10
3355	sp|Q9BYC8|RM32_HUMAN	2	2	#NAME?	0.0266591	0.55837	0.458736	0.0735242	0.283558	1.13357	['Q9BYC8']	MRPL32
2105	sp|Q15070|OXA1L_HUMAN	7	4	-9.41316	0.0266952	0.767546	0.526298	0.073575	0.544373	1.13327	['Q15070']	OXA1L
2283	sp|Q53EZ4|CEP55_HUMAN	2	2	#NAME?	0.026741	0.465923	0.464784	0.0736387	0.00352945	1.13289	['Q53EZ4']	CEP55
2674	sp|Q8N1B4|VPS52_HUMAN	5	3	-7.60392	0.0267536	0.430787	0.559888	0.0736387	-0.378163	1.13289	['Q8N1B4']	VPS52
1915	sp|Q13263|TIF1B_HUMAN	20	9	-9.88858	0.02715	1.14651	0.863824	0.0746569	0.408435	1.12693	['Q13263']	TRIM28
1252	sp|P46734|MP2K3_HUMAN	2	2	-0.377531	0.0271593	0.915565	1.09866	0.0746569	-0.263016	1.12693	['P46734']	MAP2K3
3863	sp|Q9UI26|IPO11_HUMAN	3	2	-10.0454	0.0273619	0.382779	0.598133	0.0751641	-0.643955	1.12399	['Q9UI26']	IPO11
4017	sp|Q9Y2R0|COA3_HUMAN	4	3	#NAME?	0.027386	0.448304	0.298464	0.0751807	0.586918	1.12389	['Q9Y2R0']	COA3
1195	sp|P40939|ECHA_HUMAN	28	13	-6.13067	0.0274065	0.555388	0.396536	0.0751877	0.486042	1.12385	['P40939']	HADHA
1378	sp|P51570|GALK1_HUMAN	4	3	#NAME?	0.0274684	0.551933	0.620773	0.0752197	-0.169575	1.12367	['P51570']	GALK1
2571	sp|Q86UE8|TLK2_HUMAN	2	2	#NAME?	0.0274686	0.358958	0.591736	0.0752197	-0.721139	1.12367	['Q86UE8']	TLK2
2927	sp|Q92797|SYMPK_HUMAN	18	10	-2.62865	0.0274723	0.673351	0.436139	0.0752197	0.62657	1.12367	['Q92797']	SYMPK
2302	sp|Q5BKZ1|ZN326_HUMAN	21	7	-5.43303	0.0278601	0.932277	1.07269	0.0762313	-0.202405	1.11787	['Q5BKZ1']	ZNF326
1046	sp|P30085|KCY_HUMAN	6	4	-13.8101	0.0279134	0.792284	1.2419	0.076327	-0.648461	1.11732	['P30085']	CMPK1
3700	sp|Q9NX62|IMPA3_HUMAN	6	2	0.0643348	0.0280922	0.304296	0.321419	0.0767379	-0.0789786	1.11499	['Q9NX62']	IMPAD1
1270	sp|P47756|CAPZB_HUMAN	13	8	-15.2992	0.0281004	0.906846	1.10171	0.0767379	-0.28082	1.11499	['P47756']	CAPZB
2863	sp|Q8WWM7|ATX2L_HUMAN	15	7	-12.4462	0.0281257	0.447197	0.287892	0.0767568	0.635382	1.11488	['Q8WWM7']	ATXN2L
4006	sp|Q9Y2H9|MAST1_HUMAN	2	2	-151.764	0.028233	0.451527	0.671617	0.0769992	-0.572826	1.11351	['Q9Y2H9']	MAST1
1713	sp|P84103|SRSF3_HUMAN	5	2	#NAME?	0.0283943	0.618799	1.57333	0.0773884	-1.34627	1.11132	['P84103']	SRSF3
2048	sp|Q14671|PUM1_HUMAN	5	2	-8.57914	0.0284587	0.25262	0.534314	0.0775133	-1.08072	1.11062	['Q14671']	PUM1
2343	sp|Q5T653|RM02_HUMAN	5	2	-56.4034	0.0286594	0.231099	0.35864	0.0780089	-0.634025	1.10786	['Q5T653']	MRPL2
355	sp|O75494|SRS10_HUMAN	6	6	-8.77198	0.028693	0.944308	0.640704	0.0780495	0.559598	1.10763	['O75494']	SRSF10
1042	sp|P30048|PRDX3_HUMAN	8	3	-8.77237	0.0288659	1.04798	0.939457	0.0784293	0.15771	1.10552	['P30048']	PRDX3
2267	sp|Q4G0F5|VP26B_HUMAN	2	2	#NAME?	0.0288791	0.226946	0.459722	0.0784293	-1.01841	1.10552	['Q4G0F5']	VPS26B
833	sp|P16333|NCK1_HUMAN	2	2	-12.5984	0.028889	0.436438	0.748361	0.0784293	-0.777956	1.10552	['P16333']	NCK1
1028	sp|P29323|EPHB2_HUMAN	3	2	-6.13717	0.0289846	0.421858	0.546533	0.0786375	-0.373551	1.10437	['P29323']	EPHB2
840	sp|P16949|STMN1_HUMAN	10	4	-69.8962	0.0290764	0.46695	1.01441	0.0788353	-1.1193	1.10328	['P16949']	STMN1
1163	sp|P37268|FDFT_HUMAN	7	5	-7.02524	0.0291508	0.669387	0.556255	0.0789857	0.267095	1.10245	['P37268']	FDFT1
3971	sp|Q9UQ05|KCNH4_HUMAN	2	2	#NAME?	0.0292517	0.637546	0.395295	0.0792076	0.689597	1.10123	['Q9UQ05']	KCNH4
4141	sp|Q9Y6A5|TACC3_HUMAN	8	3	-12.7906	0.0294681	0.424576	0.281706	0.0797417	0.59183	1.09831	['Q9Y6A5']	TACC3
1422	sp|P53007|TXTP_HUMAN	7	4	-12.7325	0.0296294	0.309876	0.462636	0.0801261	-0.578188	1.09623	['P53007']	SLC25A1
106	sp|O14744|ANM5_HUMAN	12	8	-7.82713	0.0296612	0.350646	0.62435	0.0801602	-0.83234	1.09604	['O14744']	PRMT5
2338	sp|Q5T2T1|MPP7_HUMAN	3	2	2.27386	0.0296955	0.209198	0.467905	0.0802009	-1.16134	1.09582	['Q5T2T1']	MPP7
1274	sp|P47985|UCRI_HUMAN	9	8	-0.983432	0.0298795	0.675552	0.488351	0.0806167	0.468147	1.09358	['P47985']	UQCRFS1
3053	sp|Q96FJ2|DYL2_HUMAN	3	3	-6.8815	0.0298881	1.10069	0.912222	0.0806167	0.270948	1.09358	['Q96FJ2']	DYNLL2
2345	sp|Q5T7W0|ZN618_HUMAN	2	2	#NAME?	0.0300119	0.390162	0.517454	0.0808981	-0.407356	1.09206	['Q5T7W0']	ZNF618
915	sp|P21127|CD11B_HUMAN	8	3	-5.32805	0.030089	0.425961	0.684031	0.0810538	-0.683341	1.09123	['P21127']	CDK11B
2635	sp|Q8IX12|CCAR1_HUMAN	18	7	-21.4928	0.0301467	0.478934	0.575572	0.0811567	-0.26517	1.09068	['Q8IX12']	CCAR1
3318	sp|Q9BVP2|GNL3_HUMAN	14	7	-11.7363	0.0302584	0.532917	0.237782	0.0814048	1.16427	1.08935	['Q9BVP2']	GNL3
2031	sp|Q14320|FA50A_HUMAN	9	4	#NAME?	0.0302933	0.241525	0.36746	0.0814462	-0.605416	1.08913	['Q14320']	FAM50A
832	sp|P16298|PP2BB_HUMAN	3	3	#NAME?	0.0304711	0.484832	0.502402	0.0818714	-0.0513553	1.08687	['P16298']	PPP3CB
3421	sp|Q9H0U4|RAB1B_HUMAN	9	6	-12.6707	0.0306095	0.546725	0.679762	0.0821905	-0.314215	1.08518	['Q9H0U4']	RAB1B
2825	sp|Q8TEY7|UBP33_HUMAN	3	2	#NAME?	0.0306727	1.08099	0.476828	0.0823071	1.18081	1.08456	['Q8TEY7']	USP33
1232	sp|P43487|RANG_HUMAN	5	3	-13.1264	0.0311596	0.921653	1.0773	0.0835599	-0.225127	1.078	['P43487']	RANBP1
3721	sp|Q9NYM9|BET1L_HUMAN	3	2	#NAME?	0.0316062	0.155462	0.158986	0.084703	-0.0323379	1.0721	['Q9NYM9']	BET1L
2582	sp|Q86VI3|IQGA3_HUMAN	3	2	#NAME?	0.0316924	0.442675	1.08066	0.0848446	-1.28759	1.07138	['Q86VI3']	IQGAP3
1727	sp|Q00577|PURA_HUMAN	3	2	-17.2384	0.0316997	0.407324	0.664226	0.0848446	-0.705496	1.07138	['Q00577']	PURA
1012	sp|P28070|PSB4_HUMAN	6	4	-3.97187	0.0317801	0.48054	0.753701	0.0850052	-0.649336	1.07055	['P28070']	PSMB4
1222	sp|P42773|CDN2C_HUMAN	2	2	#NAME?	0.0319005	0.301843	0.323507	0.0852726	-0.1	1.06919	['P42773']	CDKN2C
4106	sp|Q9Y5J7|TIM9_HUMAN	5	5	2.39057	0.0320374	0.499012	0.271047	0.08554	0.880534	1.06783	['Q9Y5J7']	TIMM9
1768	sp|Q02790|FKBP4_HUMAN	21	10	1.97125	0.0320831	0.459214	0.551823	0.08554	-0.265039	1.06783	['Q02790']	FKBP4
2887	sp|Q92504|S39A7_HUMAN	2	2	-16.3682	0.0320896	1.24174	0.793783	0.08554	0.645542	1.06783	['Q92504']	SLC39A7
1147	sp|P36405|ARL3_HUMAN	3	2	-8.58497	0.0320933	0.503708	0.777154	0.08554	-0.625612	1.06783	['P36405']	ARL3
2545	sp|Q7Z6B7|SRGP1_HUMAN	2	2	-10.9954	0.0321032	0.169866	0.163818	0.08554	0.0523008	1.06783	['Q7Z6B7']	SRGAP1
1869	sp|Q12899|TRI26_HUMAN	2	2	-4.00743	0.0324071	0.999601	0.541221	0.0862947	0.885135	1.06402	['Q12899']	TRIM26
525	sp|P00387|NB5R3_HUMAN	12	5	-5.09882	0.0325196	0.135226	0.300974	0.086539	-1.15427	1.06279	['P00387']	CYB5R3
2017	sp|Q14197|ICT1_HUMAN	5	5	-7.06709	0.0325616	0.25381	0.0978894	0.0865957	1.37452	1.0625	['Q14197']	ICT1
1213	sp|P42345|MTOR_HUMAN	6	2	-10.9354	0.0326446	0.334346	0.561657	0.086761	-0.74835	1.06168	['P42345']	MTOR
2455	sp|Q6PK04|CC137_HUMAN	5	3	0.566645	0.0326683	0.624017	0.498734	0.0867687	0.323316	1.06164	['Q6PK04']	CCDC137
3130	sp|Q96P16|RPR1A_HUMAN	6	3	#NAME?	0.0327386	0.141514	0.470147	0.0869001	-1.73217	1.06098	['Q96P16']	RPRD1A
3347	sp|Q9BXX0|EMIL2_HUMAN	2	2	#NAME?	0.0328532	0.516887	0.306534	0.0871488	0.753802	1.05974	['Q9BXX0']	EMILIN2
1805	sp|Q06210|GFPT1_HUMAN	16	7	-4.96341	0.0329545	0.937349	1.06532	0.0873619	-0.184624	1.05868	['Q06210']	GFPT1
210	sp|O43583|DENR_HUMAN	2	2	-4.60606	0.0330634	0.935079	1.06545	0.0875121	-0.188298	1.05793	['O43583']	DENR
2012	sp|Q14160|SCRIB_HUMAN	17	4	#NAME?	0.033069	0.321591	0.399389	0.0875121	-0.31257	1.05793	['Q14160']	SCRIB
2939	sp|Q92922|SMRC1_HUMAN	24	9	-3.59656	0.0330741	1.10982	0.906652	0.0875121	0.2917	1.05793	['Q92922']	SMARCC1
3121	sp|Q96MU7|YTDC1_HUMAN	8	4	-5.23856	0.0331408	0.534754	0.886739	0.087633	-0.729633	1.05733	['Q96MU7']	YTHDC1
2284	sp|Q53F19|CQ085_HUMAN	8	4	-12.3739	0.033272	1.01729	0.590662	0.0879098	0.784328	1.05596	['Q53F19']	C17orf85
134	sp|O15042|SR140_HUMAN	18	7	-4.34234	0.0332877	0.385367	0.593077	0.0879098	-0.621986	1.05596	['O15042']	U2SURP
3401	sp|Q9GZZ1|NAA50_HUMAN	4	3	-7.08915	0.0333387	0.902165	1.10406	0.0879888	-0.291359	1.05557	['Q9GZZ1']	NAA50
3928	sp|Q9ULW3|ABT1_HUMAN	3	2	#NAME?	0.0335032	1.06808	0.54132	0.0883672	0.980469	1.05371	['Q9ULW3']	ABT1
841	sp|P16989|YBOX3_HUMAN	15	7	-6.66943	0.0338812	0.181829	0.384746	0.0893076	-1.08133	1.04911	['P16989']	YBX3
741	sp|P11310|ACADM_HUMAN	10	6	-9.7774	0.0339235	0.388108	0.317241	0.089331	0.290882	1.049	['P11310']	ACADM
2124	sp|Q15287|RNPS1_HUMAN	6	3	-5.97468	0.0339329	0.239169	0.437364	0.089331	-0.870808	1.049	['Q15287']	RNPS1
4046	sp|Q9Y3A3|PHOCN_HUMAN	2	2	-21.1139	0.0339754	0.565199	1.0038	0.0893864	-0.82864	1.04873	['Q9Y3A3']	MOB4
2953	sp|Q93050|VPP1_HUMAN	3	2	-13.3065	0.0340247	0.203899	0.40025	0.0894596	-0.973045	1.04837	['Q93050']	ATP6V0A1
2662	sp|Q8IYS1|P20D2_HUMAN	4	3	-20.7977	0.0343225	0.52575	0.69186	0.0901858	-0.396102	1.04486	['Q8IYS1']	PM20D2
3574	sp|Q9NPF0|CD320_HUMAN	2	2	-19.631	0.0343802	0.422531	0.260956	0.0902804	0.695248	1.04441	['Q9NPF0']	CD320
3961	sp|Q9UPP1|PHF8_HUMAN	2	2	#NAME?	0.0344285	1.32789	0.789525	0.0903504	0.750074	1.04407	['Q9UPP1']	PHF8
1095	sp|P32519|ELF1_HUMAN	2	2	#NAME?	0.0347481	0.431641	0.431641	0.0911301	0	1.04034	['P32519']	ELF1
1760	sp|Q02241|KIF23_HUMAN	11	7	-6.87251	0.0347693	0.494518	0.327804	0.0911301	0.59319	1.04034	['Q02241']	KIF23
121	sp|O14949|QCR8_HUMAN	4	3	#NAME?	0.0348506	0.437552	0.636389	0.0912859	-0.540456	1.0396	['O14949']	UQCRQ
3883	sp|Q9UJX2|CDC23_HUMAN	3	2	#NAME?	0.0349005	0.896339	1.11579	0.0913592	-0.31595	1.03925	['Q9UJX2']	CDC23
3590	sp|Q9NQG5|RPR1B_HUMAN	8	5	-6.06166	0.0349931	0.339046	0.570627	0.091544	-0.751069	1.03837	['Q9NQG5']	RPRD1B
1200	sp|P41227|NAA10_HUMAN	6	4	-11.947	0.035073	0.821254	1.24343	0.0916956	-0.598421	1.03765	['P41227']	NAA10
3370	sp|Q9BZE1|RM37_HUMAN	7	6	-2.48704	0.0351297	0.362909	0.249859	0.091752	0.53849	1.03738	['Q9BZE1']	MRPL37
2711	sp|Q8N8A6|DDX51_HUMAN	5	3	#NAME?	0.0351386	0.45801	0.286533	0.091752	0.676679	1.03738	['Q8N8A6']	DDX51
1973	sp|Q13637|RAB32_HUMAN	11	7	-18.1818	0.0353604	0.442395	0.455582	0.0922241	-0.0423748	1.03516	['Q13637']	RAB32
4115	sp|Q9Y5Q8|TF3C5_HUMAN	2	2	#NAME?	0.0353636	0.966919	0.562847	0.0922241	0.780652	1.03516	['Q9Y5Q8']	GTF3C5
1100	sp|P33240|CSTF2_HUMAN	14	8	-3.26982	0.0354937	1.11596	0.900242	0.0924659	0.309899	1.03402	['P33240']	CSTF2
3636	sp|Q9NSI6|BRWD1_HUMAN	2	2	#NAME?	0.0355007	0.416511	0.416511	0.0924659	0	1.03402	['Q9NSI6']	BRWD1
3621	sp|Q9NRR5|UBQL4_HUMAN	4	2	#NAME?	0.0356806	1.42605	0.113791	0.0928764	3.64757	1.03209	['Q9NRR5']	UBQLN4
982	sp|P25788|PSA3_HUMAN	7	6	#NAME?	0.0357496	0.315732	0.565498	0.092998	-0.84082	1.03153	['P25788']	PSMA3
1401	sp|P52294|IMA5_HUMAN	6	2	#NAME?	0.0358643	0.374989	1.09017	0.0931731	-1.53963	1.03071	['P52294']	KPNA1
749	sp|P11766|ADHX_HUMAN	7	5	-4.12873	0.0358872	0.435582	0.504035	0.0931731	-0.210581	1.03071	['P11766']	ADH5
31	sp|O00151|PDLI1_HUMAN	14	13	-82.5811	0.0359021	0.532196	0.542574	0.0931731	-0.0278628	1.03071	['O00151']	PDLIM1
1244	sp|P46087|NOP2_HUMAN	26	11	2.01247	0.0359063	1.0564	0.945681	0.0931731	0.159737	1.03071	['P46087']	NOP2
3163	sp|Q96SI9|STRBP_HUMAN	11	5	-102.016	0.0359774	0.361737	0.246832	0.0932995	0.551415	1.03012	['Q96SI9']	STRBP
3478	sp|Q9H6R0|DHX33_HUMAN	3	3	#NAME?	0.036211	0.366843	0.404493	0.0937986	-0.140954	1.0278	['Q9H6R0']	DHX33
534	sp|P00568|KAD1_HUMAN	3	3	#NAME?	0.0362148	0.426744	0.550857	0.0937986	-0.368307	1.0278	['P00568']	AK1
3962	sp|Q9UPQ0|LIMC1_HUMAN	2	2	#NAME?	0.0364373	0.346687	0.506901	0.0943163	-0.548071	1.02541	['Q9UPQ0']	LIMCH1
584	sp|P05156|CFAI_HUMAN	2	2	#NAME?	0.0365104	0.506953	0.471384	0.0944469	0.104952	1.02481	['P05156']	CFI
327	sp|O75312|ZPR1_HUMAN	8	2	#NAME?	0.0366221	0.920321	1.08162	0.0946772	-0.23299	1.02375	['O75312']	ZPR1
2394	sp|Q68EM7|RHG17_HUMAN	7	2	#NAME?	0.0366789	0.556672	0.529582	0.0947652	0.0719728	1.02335	['Q68EM7']	ARHGAP17
2052	sp|Q14684|RRP1B_HUMAN	23	12	0.708606	0.0368402	0.507456	0.333734	0.0951229	0.604586	1.02171	['Q14684']	RRP1B
393	sp|O75909|CCNK_HUMAN	5	3	-8.5266	0.0368857	0.57951	0.917087	0.0951814	-0.662224	1.02145	['O75909']	CCNK
3748	sp|Q9P013|CWC15_HUMAN	2	2	#NAME?	0.03695	0.270262	0.563498	0.0952885	-1.06005	1.02096	['Q9P013']	CWC15
647	sp|P07996|TSP1_HUMAN	5	4	-6.66592	0.0370636	0.670123	0.480464	0.0955223	0.479999	1.0199	['P07996']	THBS1
906	sp|P20648|ATP4A_HUMAN	4	2	-7.33281	0.0372441	0.443248	0.973143	0.0958946	-1.13454	1.01821	['P20648']	ATP4A
4111	sp|Q9Y5L0|TNPO3_HUMAN	3	2	#NAME?	0.037254	0.542387	0.53117	0.0958946	0.0301494	1.01821	['Q9Y5L0']	TNPO3
718	sp|P10586|PTPRF_HUMAN	14	4	-10.0561	0.0373536	0.402291	0.333921	0.09607	0.268731	1.01741	['P10586']	PTPRF
3070	sp|Q96GK7|FAH2A_HUMAN	9	4	#NAME?	0.0373682	0.563485	0.508608	0.09607	0.147823	1.01741	['Q96GK7']	FAHD2A
802	sp|P14635|CCNB1_HUMAN	3	2	#NAME?	0.0374522	0.285019	0.449614	0.0961744	-0.657627	1.01694	['P14635']	CCNB1
1937	sp|Q13439|GOGA4_HUMAN	18	9	#NAME?	0.037455	0.428157	0.343864	0.0961744	0.316301	1.01694	['Q13439']	GOLGA4
871	sp|P18583|SON_HUMAN	34	15	-11.6505	0.0375366	0.430512	0.347052	0.0963246	0.310902	1.01626	['P18583']	SON
1023	sp|P29083|T2EA_HUMAN	5	5	#NAME?	0.0376769	0.44078	0.352626	0.0966252	0.32192	1.01491	['P29083']	GTF2E1
2658	sp|Q8IYB5|SMAP1_HUMAN	2	2	#NAME?	0.0378608	0.379824	0.610805	0.0970372	-0.685381	1.01306	['Q8IYB5']	SMAP1
416	sp|O94808|GFPT2_HUMAN	3	2	-17.5311	0.0379985	0.918235	1.08905	0.0973302	-0.24613	1.01175	['O94808']	GFPT2
847	sp|P17301|ITA2_HUMAN	2	2	#NAME?	0.0380911	0.592124	0.371461	0.0975077	0.67269	1.01096	['P17301']	ITGA2
442	sp|O95155|UBE4B_HUMAN	6	4	#NAME?	0.0381876	0.410688	0.572941	0.0976946	-0.480343	1.01013	['O95155']	UBE4B
2985	sp|Q96AE7|TTC17_HUMAN	4	2	-8.83792	0.0382231	0.474801	0.345043	0.0977255	0.460545	1.00999	['Q96AE7']	TTC17
3612	sp|Q9NR50|EI2BG_HUMAN	2	2	#NAME?	0.038322	0.063107	0.0742439	0.0979143	-0.234474	1.00915	['Q9NR50']	EIF2B3
155	sp|O15269|SPTC1_HUMAN	6	3	-1.51633	0.0383439	0.431452	0.240634	0.0979143	0.842357	1.00915	['O15269']	SPTLC1
1197	sp|P41208|CETN2_HUMAN	4	3	-8.21969	0.0384499	0.607876	0.471517	0.0981249	0.366467	1.00822	['P41208']	CETN2
2845	sp|Q8WV44|TRI41_HUMAN	2	2	-19.545	0.0385048	0.482933	0.311975	0.098155	0.630392	1.00809	['Q8WV44']	TRIM41
3017	sp|Q96D15|RCN3_HUMAN	8	5	-3.86281	0.0385088	1.16568	0.852709	0.098155	0.451044	1.00809	['Q96D15']	RCN3
956	sp|P23528|COF1_HUMAN	14	8	-156.536	0.0385771	0.921871	1.0884	0.098269	-0.239568	1.00758	['P23528']	CFL1
3352	sp|Q9BY67|CADM1_HUMAN	9	5	-3.6328	0.0386751	1.11014	0.898173	0.0984585	0.305675	1.00675	['Q9BY67']	CADM1
2586	sp|Q86W42|THOC6_HUMAN	7	4	-11.3263	0.0387682	0.192924	0.340457	0.0986354	-0.819444	1.00597	['Q86W42']	THOC6
3484	sp|Q9H6W3|NO66_HUMAN	7	5	-3.42444	0.0388471	1.09364	0.907629	0.0987415	0.268965	1.0055	['Q9H6W3']	NO66
931	sp|P22102|PUR2_HUMAN	17	8	-3.14577	0.0388573	0.316679	0.492095	0.0987415	-0.635914	1.0055	['P22102']	GART
3476	sp|Q9H6E4|CC134_HUMAN	3	3	#NAME?	0.0391641	0.442541	0.283127	0.0994602	0.644365	1.00235	['Q9H6E4']	CCDC134
3570	sp|Q9NPA8|ENY2_HUMAN	4	3	#NAME?	0.0391983	0.586529	0.648941	0.0994602	-0.145885	1.00235	['Q9NPA8']	ENY2
378	sp|O75717|WDHD1_HUMAN	7	5	-13.8293	0.0392117	0.35204	0.450222	0.0994602	-0.354898	1.00235	['O75717']	WDHD1
3929	sp|Q9ULX3|NOB1_HUMAN	10	5	-2.00352	0.0393035	0.42442	0.486	0.0996326	-0.195462	1.0016	['Q9ULX3']	NOB1
1050	sp|P30154|2AAB_HUMAN	10	5	-6.69846	0.0393408	0.894409	0.703546	0.0996636	0.34629	1.00146	['P30154']	PPP2R1B
2801	sp|Q8TCC3|RM30_HUMAN	2	2	#NAME?	0.0393635	0.56387	0.6038	0.0996636	-0.0987086	1.00146	['Q8TCC3']	MRPL30
1986	sp|Q13868|EXOS2_HUMAN	5	3	#NAME?	0.0395307	0.560839	0.488463	0.100026	0.199336	0.999887	['Q13868']	EXOSC2
715	sp|P10398|ARAF_HUMAN	2	2	#NAME?	0.0396114	0.524776	0.540087	0.100169	-0.0414885	0.999265	['P10398']	ARAF
664	sp|P08579|RU2B_HUMAN	6	3	-8.03575	0.0398749	1.0407	0.963769	0.100732	0.110789	0.996834	['P08579']	SNRPB2
1718	sp|P98179|RBM3_HUMAN	5	2	10.0964	0.039882	0.881922	1.14141	0.100732	-0.372095	0.996834	['P98179']	RBM3
2409	sp|Q6GQQ9|OTU7B_HUMAN	4	2	#NAME?	0.0399616	0.498598	0.351649	0.100872	0.503742	0.996231	['Q6GQQ9']	OTUD7B
2388	sp|Q68CQ4|DIEXF_HUMAN	3	2	4.65439	0.0401315	0.219262	0.239289	0.101239	-0.126101	0.994652	['Q68CQ4']	DIEXF
3396	sp|Q9GZT3|SLIRP_HUMAN	6	3	-11.0051	0.0405318	0.51929	0.543971	0.102187	-0.0669887	0.990603	['Q9GZT3']	SLIRP
2238	sp|Q2PPJ7|RGPA2_HUMAN	2	2	#NAME?	0.0405682	0.910803	0.71797	0.102217	0.343215	0.990478	['Q2PPJ7']	RALGAPA2
462	sp|O95298|NDUC2_HUMAN	6	5	-5.15674	0.0405925	0.758413	0.659434	0.102217	0.201756	0.990478	['O95298']	NDUFC2
3039	sp|Q96ER9|CCD51_HUMAN	5	2	-29.685	0.0408261	1.09448	0.408597	0.102743	1.42149	0.988249	['Q96ER9']	CCDC51
429	sp|O94906|PRP6_HUMAN	32	17	-5.86476	0.041001	0.508036	0.394296	0.103121	0.36565	0.986654	['O94906']	PRPF6
2199	sp|Q16625|OCLN_HUMAN	7	4	-11.8684	0.0411303	0.583777	0.315275	0.103384	0.888808	0.985548	['Q16625']	OCLN
3452	sp|Q9H3P7|GCP60_HUMAN	5	3	-5.48977	0.0411748	0.570605	1.05282	0.103433	-0.883689	0.98534	['Q9H3P7']	ACBD3
1479	sp|P55854|SUMO3_HUMAN	2	2	#NAME?	0.0412083	0.170515	0.161351	0.103455	0.0796986	0.985249	['P55854']	SUMO3
1402	sp|P52298|NCBP2_HUMAN	2	2	0.415288	0.0413521	0.576814	1.04574	0.103753	-0.858353	0.983998	['P52298']	NCBP2
3622	sp|Q9NRV9|HEBP1_HUMAN	2	2	#NAME?	0.0413882	0.655712	0.567361	0.103782	0.208795	0.98388	['Q9NRV9']	HEBP1
4089	sp|Q9Y4R8|TELO2_HUMAN	3	2	3.3821	0.0415727	0.235378	0.239609	0.104162	-0.0257028	0.982291	['Q9Y4R8']	TELO2
5	sp|A2VCL2|CC162_HUMAN	2	2	-6.41861	0.0415898	0.512642	0.272768	0.104162	0.910277	0.982291	['A2VCL2']	CCDC162P
201	sp|O43399|TPD54_HUMAN	11	6	-146.122	0.0417019	1.08985	0.922742	0.10438	0.240132	0.981383	['O43399']	TPD52L2
2777	sp|Q8NFX7|STXB6_HUMAN	4	2	#NAME?	0.0418836	0.508992	0.691544	0.104772	-0.442177	0.979755	['Q8NFX7']	STXBP6
876	sp|P18827|SDC1_HUMAN	4	2	-13.8424	0.0420274	0.613914	0.722152	0.10503	-0.234267	0.978686	['P18827']	SDC1
483	sp|O95563|MPC2_HUMAN	2	2	#NAME?	0.0420372	0.310316	0.521709	0.10503	-0.749507	0.978686	['O95563']	MPC2
3015	sp|Q96CW5|GCP3_HUMAN	3	3	#NAME?	0.0421499	0.479454	0.389172	0.105248	0.300985	0.977784	['Q96CW5']	TUBGCP3
1385	sp|P51659|DHB4_HUMAN	18	11	#NAME?	0.0422831	0.44305	0.458889	0.105518	-0.0506762	0.976674	['P51659']	HSD17B4
1567	sp|P62081|RS7_HUMAN	9	7	-8.01439	0.0427508	0.529405	1.00942	0.106621	-0.931083	0.972156	['P62081']	RPS7
2359	sp|Q5UCC4|EMC10_HUMAN	3	2	-3.53686	0.0432955	0.680903	0.600424	0.107915	0.181468	0.966917	['Q5UCC4']	EMC10
1850	sp|Q10570|CPSF1_HUMAN	16	10	#NAME?	0.0434141	0.498578	0.416966	0.108146	0.257889	0.965989	['Q10570']	CPSF1
2022	sp|Q14236|EPAG_HUMAN	2	2	#NAME?	0.0435462	0.418975	0.249776	0.108411	0.746228	0.964928	['Q14236']	DIAPH2-AS1
244	sp|O43847|NRDC_HUMAN	5	2	-12.0385	0.0438061	0.37048	0.335025	0.108992	0.145127	0.962604	['O43847']	NRD1
1083	sp|P31937|3HIDH_HUMAN	2	2	#NAME?	0.0439816	1.08038	0.570031	0.109364	0.92243	0.961126	['P31937']	HIBADH
2561	sp|Q86SX6|GLRX5_HUMAN	3	3	#NAME?	0.0441229	1.1282	0.882685	0.10961	0.354059	0.960152	['Q86SX6']	GLRX5
3195	sp|Q99541|PLIN2_HUMAN	3	2	#NAME?	0.0441329	0.695236	0.440588	0.10961	0.658072	0.960152	['Q99541']	PLIN2
2451	sp|Q6PGP7|TTC37_HUMAN	2	2	#NAME?	0.0441886	0.668546	0.405522	0.109682	0.721248	0.959863	['Q6PGP7']	TTC37
3437	sp|Q9H2H9|S38A1_HUMAN	2	2	-57.7916	0.0443291	0.952493	0.668667	0.109946	0.510421	0.958821	['Q9H2H9']	SLC38A1
1400	sp|P52292|IMA1_HUMAN	15	4	0.168489	0.0443475	1.05401	0.952629	0.109946	0.145905	0.958821	['P52292']	KPNA2
2488	sp|Q6ZNB6|NFXL1_HUMAN	8	4	-16.0736	0.0443999	0.541621	0.380806	0.109994	0.508227	0.958631	['Q6ZNB6']	NFXL1
2706	sp|Q8N766|EMC1_HUMAN	15	9	-8.70944	0.0444196	0.413599	0.298492	0.109994	0.47054	0.958631	['Q8N766']	EMC1
1395	sp|P51970|NDUA8_HUMAN	2	2	#NAME?	0.044452	0.62612	0.698191	0.110009	-0.157183	0.958572	['P51970']	NDUFA8
1019	sp|P28370|SMCA1_HUMAN	9	4	-4.39243	0.0446627	0.610692	0.562119	0.110409	0.11957	0.956997	['P28370']	SMARCA1
189	sp|O43242|PSMD3_HUMAN	17	8	-9.06178	0.0446665	0.213503	0.325431	0.110409	-0.608092	0.956997	['O43242']	PSMD3
3479	sp|Q9H6R4|NOL6_HUMAN	11	6	#NAME?	0.0452051	0.448871	0.443104	0.111674	0.0186539	0.952049	['Q9H6R4']	NOL6
2035	sp|Q14457|BECN1_HUMAN	2	2	-70.1442	0.0452505	0.497265	0.512478	0.11172	-0.0434757	0.95187	['Q14457']	BECN1
2734	sp|Q8NBU5|ATAD1_HUMAN	8	7	-8.34733	0.045321	0.531742	0.39946	0.111828	0.412677	0.951451	['Q8NBU5']	ATAD1
991	sp|P26440|IVD_HUMAN	9	7	-13.9841	0.0454076	0.583628	0.488755	0.111975	0.255937	0.950879	['P26440']	IVD
4063	sp|Q9Y3E1|HDGR3_HUMAN	4	2	#NAME?	0.0454376	0.60952	0.9962	0.111983	-0.708762	0.950849	['Q9Y3E1']	HDGFRP3
748	sp|P11717|MPRI_HUMAN	33	11	-2.52619	0.045471	0.589907	0.449677	0.111999	0.391598	0.950787	['P11717']	IGF2R
2144	sp|Q15428|SF3A2_HUMAN	5	2	-1.4545	0.0457598	0.310089	0.609046	0.112644	-0.973871	0.948293	['Q15428']	SF3A2
2763	sp|Q8NEW0|ZNT7_HUMAN	2	2	#NAME?	0.0458869	0.346937	0.346937	0.11289	4.19664e-14	0.947345	['Q8NEW0']	SLC30A7
1487	sp|P56377|AP1S2_HUMAN	2	2	#NAME?	0.0459561	0.517034	0.322291	0.112994	0.681898	0.946946	['P56377']	AP1S2
2943	sp|Q92947|GCDH_HUMAN	4	2	#NAME?	0.0459919	0.987987	0.692935	0.113015	0.511772	0.946865	['Q92947']	GCDH
1909	sp|Q13206|DDX10_HUMAN	12	6	-12.6837	0.0461252	0.564126	0.474651	0.113276	0.249148	0.945864	['Q13206']	DDX10
834	sp|P16401|H15_HUMAN	10	3	-8.23678	0.0462375	1.08847	0.91872	0.113448	0.244604	0.945202	['P16401']	HIST1H1B
3943	sp|Q9UN86|G3BP2_HUMAN	8	4	#NAME?	0.0462499	0.205712	1.02821	0.113448	-2.32144	0.945202	['Q9UN86']	G3BP2
2264	sp|Q49A26|GLYR1_HUMAN	5	2	-16.6909	0.0465817	1.0839	0.476603	0.114195	1.18537	0.942353	['Q49A26']	GLYR1
2576	sp|Q86UR5|RIMS1_HUMAN	3	3	-14.1597	0.0468299	0.315849	0.58026	0.11466	-0.877462	0.940586	['Q86UR5']	RIMS1
835	sp|P16402|H13_HUMAN	6	3	2.96698	0.0468541	1.07457	0.930607	0.11466	0.207511	0.940586	['P16402']	HIST1H1D
836	sp|P16403|H12_HUMAN	8	3	2.7425	0.0468541	1.07464	0.930541	0.11466	0.207717	0.940586	['P16403']	HIST1H1C
3858	sp|Q9UHX1|PUF60_HUMAN	14	6	-10.7023	0.0470954	0.306655	0.484437	0.115184	-0.659691	0.93861	['Q9UHX1']	PUF60
1393	sp|P51948|MAT1_HUMAN	2	2	#NAME?	0.0472766	0.760967	0.92304	0.115559	-0.27856	0.937196	['P51948']	MNAT1
2928	sp|Q92804|RBP56_HUMAN	9	6	-10.0333	0.0475715	1.07414	0.92377	0.116211	0.217575	0.934751	['Q92804']	TAF15
846	sp|P17252|KPCA_HUMAN	5	2	#NAME?	0.0476931	0.347528	0.52054	0.11644	-0.582882	0.933897	['P17252']	PRKCA
78	sp|O00592|PODXL_HUMAN	3	2	-6.89391	0.048191	0.560774	0.529798	0.117568	0.0819772	0.92971	['O00592']	PODXL
2387	sp|Q68CP9|ARID2_HUMAN	2	2	#NAME?	0.0482114	0.494915	0.469676	0.117568	0.0755135	0.92971	['Q68CP9']	ARID2
81	sp|O00743|PPP6_HUMAN	6	4	-11.8366	0.0484672	0.306024	0.424708	0.118123	-0.472827	0.927666	['O00743']	PPP6C
650	sp|P08123|CO1A2_HUMAN	22	8	-2.9105	0.0487911	0.438651	0.599668	0.118843	-0.45109	0.925027	['P08123']	COL1A2
2245	sp|Q2V2M9|FHOD3_HUMAN	3	2	#NAME?	0.0490707	0.706841	0.452021	0.119454	0.644996	0.922799	['Q2V2M9']	FHOD3
666	sp|P08648|ITA5_HUMAN	9	4	0.056856	0.049286	0.665398	0.425329	0.11984	0.645637	0.921399	['P08648']	ITGA5
921	sp|P21359|NF1_HUMAN	3	2	-22.7914	0.0492867	0.163627	0.341175	0.11984	-1.06011	0.921399	['P21359']	NF1
2753	sp|Q8NDV3|SMC1B_HUMAN	6	2	-25.4971	0.0495031	0.237781	0.0508229	0.120281	2.22608	0.919804	['Q8NDV3']	SMC1B
1964	sp|Q13610|PWP1_HUMAN	4	2	-13.527	0.0495256	0.489565	0.417725	0.120281	0.228948	0.919804	['Q13610']	PWP1
2708	sp|Q8N7X1|RMXL3_HUMAN	2	2	#NAME?	0.0497651	0.824177	0.85517	0.120792	-0.0532572	0.917962	['Q8N7X1']	RBMXL3
2655	sp|Q8IY95|TM192_HUMAN	2	2	#NAME?	0.0498795	0.370567	0.209439	0.120999	0.823203	0.917218	['Q8IY95']	TMEM192
2241	sp|Q2TAA5|ALG11_HUMAN	2	2	#NAME?	0.0499263	0.570307	0.384327	0.121042	0.569404	0.917063	['Q2TAA5']	ALG11
1323	sp|P49711|CTCF_HUMAN	3	3	-3.83266	0.0504569	0.757891	0.547408	0.122258	0.469373	0.912724	['P49711']	CTCF
1457	sp|P54920|SNAA_HUMAN	10	5	-16.4213	0.050598	1.0209	0.454012	0.122528	1.16904	0.911764	['P54920']	NAPA
739	sp|P11277|SPTB1_HUMAN	3	2	1.05557	0.0507321	0.428654	0.460072	0.122782	-0.102045	0.910866	['P11277']	SPTB
1386	sp|P51665|PSMD7_HUMAN	8	3	#NAME?	0.0509245	0.241776	0.512399	0.123176	-1.0836	0.909474	['P51665']	PSMD7
152	sp|O15230|LAMA5_HUMAN	10	6	-5.84646	0.0510063	0.498447	0.402658	0.123302	0.307885	0.90903	['O15230']	LAMA5
1740	sp|Q01469|FABP5_HUMAN	4	2	#NAME?	0.0512854	0.601497	0.276894	0.123905	1.11922	0.906911	['Q01469']	FABP5
912	sp|P20839|IMDH1_HUMAN	4	2	#NAME?	0.0513385	0.629585	1.04125	0.123962	-0.725841	0.906713	['P20839']	IMPDH1
3300	sp|Q9BUQ8|DDX23_HUMAN	18	6	-8.17787	0.0514532	0.506974	0.518261	0.124166	-0.0317665	0.905996	['Q9BUQ8']	DDX23
193	sp|O43290|SNUT1_HUMAN	32	10	0.924408	0.0515778	1.05854	0.947121	0.124395	0.16045	0.905196	['O43290']	SART1
1960	sp|Q13586|STIM1_HUMAN	6	4	-12.5053	0.0517646	0.460491	0.479392	0.124774	-0.0580335	0.903877	['Q13586']	STIM1
1636	sp|P63167|DYL1_HUMAN	3	2	-5.26613	0.0518099	1.19505	0.836782	0.124811	0.514153	0.903748	['P63167']	DYNLL1
2353	sp|Q5TCS8|KAD9_HUMAN	2	2	5.06685	0.0518513	0.472687	0.441032	0.124833	0.1	0.903669	['Q5TCS8']	AK9
3693	sp|Q9NX20|RM16_HUMAN	3	2	#NAME?	0.0518792	0.989028	0.529902	0.124833	0.900285	0.903669	['Q9NX20']	MRPL16
2225	sp|Q1KMD3|HNRL2_HUMAN	27	8	-2.18202	0.0521472	1.10089	0.904492	0.125327	0.283485	0.901955	['Q1KMD3']	HNRNPUL2
701	sp|P09972|ALDOC_HUMAN	6	2	-12.3461	0.0521606	1.20768	0.828034	0.125327	0.544475	0.901955	['P09972']	ALDOC
286	sp|O60739|EIF1B_HUMAN;sp|P41567|EIF1_HUMAN	3	3	-0.854413	0.0521746	1.08424	0.67655	0.125327	0.680414	0.901955	['O60739', 'P41567']	EIF1B
2749	sp|Q8ND82|Z280C_HUMAN	2	2	#NAME?	0.0522118	1.08112	0.481167	0.125344	1.16792	0.901895	['Q8ND82']	ZNF280C
434	sp|O94973|AP2A2_HUMAN	13	5	0.500775	0.0522766	0.713052	0.598409	0.125423	0.252875	0.901622	['O94973']	AP2A2
523	sp|P00367|DHE3_HUMAN	22	8	-8.22599	0.0523162	0.933383	1.07388	0.125423	-0.202295	0.901622	['P00367']	GLUD1
1816	sp|Q07157|ZO1_HUMAN	52	21	-3.64772	0.0523349	0.975167	1.02751	0.125423	-0.0754357	0.901622	['Q07157']	TJP1
706	sp|P0CB43|F203B_HUMAN;sp|Q9BTY7|F203A_HUMAN	2	2	#NAME?	0.0524938	0.278949	0.292328	0.12569	-0.067588	0.900699	['P0CB43', 'Q9BTY7']	FAM203B
2101	sp|Q15057|ACAP2_HUMAN	2	2	#NAME?	0.0525065	0.450662	0.453714	0.12569	-0.00973686	0.900699	['Q15057']	ACAP2
1840	sp|Q09161|NCBP1_HUMAN	8	3	-8.67454	0.0526105	0.932794	1.06708	0.125836	-0.194038	0.900196	['Q09161']	NCBP1
3043	sp|Q96EY1|DNJA3_HUMAN	6	2	-9.97304	0.0526277	1.07088	0.925307	0.125836	0.210798	0.900196	['Q96EY1']	DNAJA3
2386	sp|Q66PJ3|AR6P4_HUMAN	2	2	#NAME?	0.0527497	0.855525	0.755691	0.126055	0.179013	0.899439	['Q66PJ3']	ARL6IP4
3788	sp|Q9P2R3|ANFY1_HUMAN	7	3	-15.2724	0.0529167	0.327481	0.18133	0.126382	0.852795	0.898315	['Q9P2R3']	ANKFY1
3334	sp|Q9BX67|JAM3_HUMAN	3	2	-0.272863	0.0530099	0.737918	0.537625	0.126532	0.456861	0.8978	['Q9BX67']	JAM3
288	sp|O60762|DPM1_HUMAN	6	2	#NAME?	0.0532286	0.440295	0.676326	0.126964	-0.619247	0.896319	['O60762']	DPM1
2941	sp|Q92930|RAB8B_HUMAN	3	3	#NAME?	0.0532519	0.494206	0.532654	0.126964	-0.108086	0.896319	['Q92930']	RAB8B
222	sp|O43681|ASNA_HUMAN	7	3	-105.856	0.0534522	0.503593	0.741036	0.127369	-0.557287	0.894936	['O43681']	ASNA1
2177	sp|Q15904|VAS1_HUMAN	2	2	-11.3831	0.0535288	0.577915	0.41105	0.127479	0.491544	0.894563	['Q15904']	ATP6AP1
463	sp|O95299|NDUAA_HUMAN	7	5	-57.1131	0.053598	0.602828	0.636683	0.127563	-0.0788279	0.894274	['O95299']	NDUFA10
2416	sp|Q6KB66|K2C80_HUMAN	6	2	-6.00311	0.0536255	0.316323	0.544392	0.127563	-0.783248	0.894274	['Q6KB66']	KRT80
2995	sp|Q96BJ3|AIDA_HUMAN	2	2	3.76382	0.0540346	0.670688	0.457477	0.128463	0.551943	0.891222	['Q96BJ3']	AIDA
2713	sp|Q8N8R3|MCATL_HUMAN	2	2	#NAME?	0.0549115	0.480614	0.272767	0.130473	0.817212	0.884478	['Q8N8R3']	SLC25A29
2257	sp|Q3MHD2|LSM12_HUMAN	2	2	#NAME?	0.0549594	0.68781	1.02211	0.130513	-0.571471	0.884347	['Q3MHD2']	LSM12
653	sp|P08174|DAF_HUMAN	3	2	-5.65943	0.0553105	1.15474	0.865993	0.131201	0.415146	0.882063	['P08174']	CD55
1880	sp|Q12974|TP4A2_HUMAN	4	4	#NAME?	0.0553121	0.234997	0.443265	0.131201	-0.915528	0.882063	['Q12974']	PTP4A2
55	sp|O00391|QSOX1_HUMAN	2	2	#NAME?	0.0553668	0.613288	0.456412	0.131256	0.426228	0.88188	['O00391']	QSOX1
3644	sp|Q9NTX5|ECHD1_HUMAN	3	2	#NAME?	0.0554001	0.94777	0.646243	0.13126	0.552461	0.881866	['Q9NTX5']	ECHDC1
3690	sp|Q9NWX6|THG1_HUMAN	3	3	-8.71918	0.0557073	0.378896	0.55804	0.131913	-0.558566	0.879711	['Q9NWX6']	THG1L
202	sp|O43402|EMC8_HUMAN	2	2	#NAME?	0.0557605	0.424758	0.224672	0.131964	0.918823	0.879543	['O43402']	EMC8
862	sp|P17980|PRS6A_HUMAN	18	8	-13.2542	0.0566474	0.384231	0.364243	0.133987	0.0770731	0.872937	['P17980']	PSMC3
3963	sp|Q9UPT5|EXOC7_HUMAN	8	5	#NAME?	0.0567484	0.399644	0.484229	0.13415	-0.276974	0.872409	['Q9UPT5']	EXOC7
4056	sp|Q9Y3C1|NOP16_HUMAN	8	4	-8.99014	0.0568989	0.469081	0.363786	0.13443	0.366745	0.871504	['Q9Y3C1']	NOP16
315	sp|O75150|BRE1B_HUMAN	4	3	#NAME?	0.0569726	0.502596	0.4354	0.134528	0.207057	0.871189	['O75150']	RNF40
4033	sp|Q9Y2Z4|SYYM_HUMAN	7	3	-6.2947	0.0571017	0.266572	0.414526	0.134756	-0.636941	0.870451	['Q9Y2Z4']	YARS2
1918	sp|Q13308|PTK7_HUMAN	15	12	-7.40653	0.0573212	0.669058	0.550121	0.135198	0.282382	0.869031	['Q13308']	PTK7
4137	sp|Q9Y679|AUP1_HUMAN	6	4	0.246123	0.0574276	0.484126	0.327613	0.135298	0.563393	0.868708	['Q9Y679']	AUP1
3980	sp|Q9UQR1|ZN148_HUMAN	3	3	#NAME?	0.0574288	0.519527	0.532067	0.135298	-0.0344089	0.868708	['Q9UQR1']	ZNF148
3494	sp|Q9H7Z7|PGES2_HUMAN	6	2	#NAME?	0.0575948	1.10003	0.904113	0.135613	0.282966	0.867699	['Q9H7Z7']	PTGES2
2308	sp|Q5GLZ8|HERC4_HUMAN	2	2	#NAME?	0.0576341	0.231112	0.416174	0.135629	-0.848596	0.867649	['Q5GLZ8']	HERC4
970	sp|P25054|APC_HUMAN	2	2	-4.69827	0.057758	0.499433	0.328451	0.135844	0.604613	0.86696	['P25054']	APC
619	sp|P07108|ACBP_HUMAN	2	2	8.56189	0.057885	0.8848	1.1302	0.135995	-0.353152	0.866476	['P07108']	DBI
2829	sp|Q8TF72|SHRM3_HUMAN	2	2	#NAME?	0.0578876	0.272976	0.600995	0.135995	-1.13858	0.866476	['Q8TF72']	SHROOM3
485	sp|O95573|ACSL3_HUMAN	17	9	-6.29579	0.0581808	0.656562	0.509935	0.136536	0.364619	0.864752	['O95573']	ACSL3
1684	sp|P78559|MAP1A_HUMAN	3	2	-0.521723	0.0581921	0.435452	0.44843	0.136536	-0.0423688	0.864752	['P78559']	MAP1A
1633	sp|P63151|2ABA_HUMAN	6	5	-4.88983	0.0582161	0.56722	0.624684	0.136536	-0.139218	0.864752	['P63151']	PPP2R2A
3540	sp|Q9HC35|EMAL4_HUMAN	8	3	-15.4753	0.058402	0.474787	0.559791	0.136881	-0.237608	0.863657	['Q9HC35']	EML4
1557	sp|P61927|RL37_HUMAN	3	3	#NAME?	0.0584288	1.05481	0.648379	0.136881	0.702078	0.863657	['P61927']	RPL37
1610	sp|P62857|RS28_HUMAN	2	2	#NAME?	0.0586243	0.964138	1.0353	0.137262	-0.102742	0.86245	['P62857']	RPS28
1957	sp|Q13564|ULA1_HUMAN	4	3	0.462657	0.0587671	0.906221	1.09681	0.137519	-0.275375	0.861637	['Q13564']	NAE1
2888	sp|Q92520|FAM3C_HUMAN	8	3	-10.1996	0.0588937	1.04792	0.952339	0.137738	0.137975	0.860946	['Q92520']	FAM3C
170	sp|O15427|MOT4_HUMAN	7	5	#NAME?	0.0591528	0.479366	0.364913	0.138256	0.393574	0.859315	['O15427']	SLC16A3
2358	sp|Q5U5X0|LYRM7_HUMAN	4	3	3.03685	0.0591816	1.16392	0.863571	0.138256	0.430611	0.859315	['Q5U5X0']	LYRM7
2111	sp|Q15125|EBP_HUMAN	2	2	-10.5317	0.0595942	0.56392	1.08246	0.139109	-0.940748	0.856645	['Q15125']	EBP
2651	sp|Q8IY18|SMC5_HUMAN	3	3	#NAME?	0.0596133	0.508495	0.382257	0.139109	0.411691	0.856645	['Q8IY18']	SMC5
1125	sp|P35268|RL22_HUMAN	5	3	-5.8441	0.0600716	0.585512	0.579753	0.1401	0.0142595	0.853562	['P35268']	RPL22
1185	sp|P40261|NNMT_HUMAN	3	2	3.82703	0.0601983	0.839036	1.16888	0.140317	-0.478319	0.85289	['P40261']	NNMT
3631	sp|Q9NS87|KIF15_HUMAN	3	2	-3.13924	0.0605458	0.440837	0.70834	0.140966	-0.684198	0.850886	['Q9NS87']	KIF15
3069	sp|Q96GD4|AURKB_HUMAN	2	2	#NAME?	0.0605831	0.67787	0.336369	0.140966	1.01096	0.850886	['Q96GD4']	AURKB
3213	sp|Q99700|ATX2_HUMAN	7	4	-5.31771	0.060609	0.392535	0.313128	0.140966	0.32607	0.850886	['Q99700']	ATXN2
2505	sp|Q7KZI7|MARK2_HUMAN	4	2	#NAME?	0.060612	0.446235	0.399274	0.140966	0.160423	0.850886	['Q7KZI7']	MARK2
3884	sp|Q9UJX3|APC7_HUMAN	6	4	-150.515	0.0613091	0.597443	0.522048	0.142508	0.194618	0.846161	['Q9UJX3']	ANAPC7
452	sp|O95218|ZRAB2_HUMAN	5	2	#NAME?	0.0614014	0.629752	0.396525	0.142643	0.667371	0.84575	['O95218']	ZRANB2
3529	sp|Q9HAV7|GRPE1_HUMAN	9	5	-8.63417	0.06147	1.10141	0.901838	0.142723	0.288416	0.845507	['Q9HAV7']	GRPEL1
769	sp|P12883|MYH7_HUMAN	3	2	#NAME?	0.061687	0.506374	0.334517	0.143147	0.598126	0.844218	['P12883']	MYH7
3968	sp|Q9UPV0|CE164_HUMAN	2	2	#NAME?	0.0617392	0.430848	0.281007	0.143188	0.616575	0.844093	['Q9UPV0']	CEP164
671	sp|P08754|GNAI3_HUMAN	8	4	-5.89398	0.0618868	1.01361	0.404165	0.143451	1.32648	0.843297	['P08754']	GNAI3
1375	sp|P51531|SMCA2_HUMAN	8	4	-7.61084	0.0622509	0.445646	0.666944	0.144215	-0.58167	0.840991	['P51531']	SMARCA2
3970	sp|Q9UPY8|MARE3_HUMAN	2	2	#NAME?	0.0624827	0.805651	1.25811	0.144671	-0.64303	0.839618	['Q9UPY8']	MAPRE3
3646	sp|Q9NU22|MDN1_HUMAN	29	6	#NAME?	0.0625413	0.313092	0.471655	0.144726	-0.591147	0.839452	['Q9NU22']	MDN1
389	sp|O75874|IDHC_HUMAN	11	6	-8.76457	0.0626298	0.405226	0.531189	0.144851	-0.390496	0.839079	['O75874']	IDH1
2336	sp|Q5T200|ZC3HD_HUMAN	7	2	-91.5323	0.0630949	0.40382	0.603707	0.145824	-0.580133	0.836171	['Q5T200']	ZC3H13
2357	sp|Q5THJ4|VP13D_HUMAN	2	2	#NAME?	0.0631205	0.421531	0.45636	0.145824	-0.114532	0.836171	['Q5THJ4']	VPS13D
2418	sp|Q6L8Q7|PDE12_HUMAN	8	4	#NAME?	0.0632646	0.604972	0.598132	0.145922	0.0164055	0.83588	['Q6L8Q7']	PDE12
3078	sp|Q96HA1|P121A_HUMAN	4	2	#NAME?	0.0632677	0.593476	0.406104	0.145922	0.547338	0.83588	['Q96HA1']	POM121
22	sp|A8CG34|P121C_HUMAN	4	2	#NAME?	0.0632677	0.593476	0.406104	0.145922	0.547338	0.83588	['A8CG34']	POM121C
2402	sp|Q6DKK2|TTC19_HUMAN	7	2	#NAME?	0.063655	0.601169	0.432852	0.146734	0.473897	0.83347	['Q6DKK2']	TTC19
1784	sp|Q03692|COAA1_HUMAN	2	2	#NAME?	0.0637114	0.651751	0.614767	0.146783	0.0842804	0.833325	['Q03692']	COL10A1
1414	sp|P52758|UK114_HUMAN	2	2	#NAME?	0.0638563	0.310525	0.491081	0.147035	-0.661249	0.832579	['P52758']	HRSP12
1122	sp|P35249|RFC4_HUMAN	11	8	-7.1056	0.0641283	0.500297	0.278044	0.14758	0.847471	0.830972	['P35249']	RFC4
3890	sp|Q9UK76|HN1_HUMAN	4	4	-142.386	0.0642075	0.255281	0.54337	0.147681	-1.08985	0.830676	['Q9UK76']	HN1
962	sp|P24534|EF1B_HUMAN	10	5	-4.17865	0.0643284	0.22233	0.243458	0.147877	-0.130968	0.830099	['P24534']	EEF1B2
1408	sp|P52597|HNRPF_HUMAN	12	10	#NAME?	0.0646259	1.02708	0.498613	0.148479	1.04255	0.828334	['P52597']	HNRNPF
2675	sp|Q8N1F7|NUP93_HUMAN	30	13	-10.6757	0.0647039	0.474843	0.407264	0.148515	0.221485	0.82823	['Q8N1F7']	NUP93
90	sp|O14562|UBFD1_HUMAN	2	2	#NAME?	0.0647126	0.632795	0.477017	0.148515	0.407696	0.82823	['O14562']	UBFD1
724	sp|P10768|ESTD_HUMAN	6	3	2.363	0.0648869	0.908657	0.700504	0.148833	0.375342	0.8273	['P10768']	ESD
1631	sp|P63098|CANB1_HUMAN	3	3	#NAME?	0.0649895	0.476645	0.494482	0.148931	-0.0530023	0.827014	['P63098']	PPP3R1
811	sp|P15121|ALDR_HUMAN	5	5	-0.0354999	0.0650012	0.437372	0.526756	0.148931	-0.268275	0.827014	['P15121']	AKR1B1
295	sp|O60831|PRAF2_HUMAN	3	2	-3.26248	0.0652631	0.920979	1.0858	0.149449	-0.23752	0.825506	['O60831']	PRAF2
1287	sp|P48637|GSHB_HUMAN	8	5	1.64419	0.0659243	0.390091	0.595968	0.150881	-0.611424	0.821367	['P48637']	GSS
785	sp|P13693|TCTP_HUMAN	7	3	-16.0233	0.0662852	0.641815	0.303088	0.151614	1.08242	0.819259	['P13693']	TPT1
4028	sp|Q9Y2W6|TDRKH_HUMAN	15	4	4.0469	0.0663177	1.15219	0.864265	0.151614	0.414831	0.819259	['Q9Y2W6']	TDRKH
2816	sp|Q8TE73|DYH5_HUMAN	4	2	#NAME?	0.0664522	0.607821	0.420182	0.151839	0.532633	0.818618	['Q8TE73']	DNAH5
3694	sp|Q9NX24|NHP2_HUMAN	4	2	#NAME?	0.0672995	1.10301	0.919932	0.153691	0.26185	0.813353	['Q9NX24']	NHP2
3856	sp|Q9UHR5|S30BP_HUMAN	2	2	#NAME?	0.0674008	0.638256	0.605211	0.153838	0.0766981	0.812937	['Q9UHR5']	SAP30BP
2376	sp|Q5W0Z9|ZDH20_HUMAN	3	2	#NAME?	0.0675421	0.741918	1.00151	0.154076	-0.432841	0.812266	['Q5W0Z9']	ZDHHC20
2811	sp|Q8TDD1|DDX54_HUMAN	19	8	-5.79807	0.0677234	0.623344	0.533687	0.154405	0.224034	0.811339	['Q8TDD1']	DDX54
1535	sp|P61218|RPAB2_HUMAN	2	2	#NAME?	0.0680163	0.289335	0.35813	0.154988	-0.307741	0.809702	['P61218']	POLR2F
3419	sp|Q9H0S4|DDX47_HUMAN	12	4	0.325736	0.0680766	0.654624	0.984266	0.155041	-0.588381	0.809555	['Q9H0S4']	DDX47
1373	sp|P51153|RAB13_HUMAN	4	2	#NAME?	0.0681276	1.02063	0.592112	0.155072	0.785515	0.809466	['P51153']	RAB13
2646	sp|Q8IXQ6|PARP9_HUMAN	3	3	#NAME?	0.0682131	0.459425	0.273408	0.155182	0.748772	0.809159	['Q8IXQ6']	PARP9
3984	sp|Q9Y232|CDYL1_HUMAN	2	2	#NAME?	0.0685283	0.689258	0.353269	0.155705	0.964277	0.807698	['Q9Y232']	CDYL
302	sp|O60925|PFD1_HUMAN	4	2	#NAME?	0.0685427	0.899242	0.768873	0.155705	0.225965	0.807698	['O60925']	PFDN1
1289	sp|P48681|NEST_HUMAN	28	13	-13.2329	0.0685549	0.435982	0.409081	0.155705	0.0918802	0.807698	['P48681']	NES
3986	sp|Q9Y247|FA50B_HUMAN	4	3	-2.46855	0.0687465	0.184424	0.247741	0.155993	-0.425808	0.806894	['Q9Y247']	FAM50B
1226	sp|P43034|LIS1_HUMAN	13	6	-3.2061	0.0687567	0.48937	0.741995	0.155993	-0.600483	0.806894	['P43034']	PAFAH1B1
2224	sp|Q1ED39|KNOP1_HUMAN	8	4	-6.06814	0.0688644	0.615674	0.387453	0.156153	0.668145	0.806451	['Q1ED39']	KNOP1
1824	sp|Q08043|ACTN3_HUMAN	10	4	-0.112364	0.0691817	1.12216	0.889794	0.156787	0.334735	0.804691	['Q08043']	ACTN3
2400	sp|Q6DKI1|RL7L_HUMAN	6	3	#NAME?	0.0693195	1.05128	0.526072	0.157014	0.998818	0.804062	['Q6DKI1']	RPL7L1
13	sp|A6NDG6|PGP_HUMAN	3	2	#NAME?	0.0694077	0.334944	0.662357	0.157128	-0.983691	0.803746	['A6NDG6']	PGP
1208	sp|P42166|LAP2A_HUMAN	28	12	-0.833732	0.0695161	1.0517	0.952976	0.157288	0.142209	0.803304	['P42166']	TMPO
171	sp|O15439|MRP4_HUMAN	3	2	-13.232	0.0695984	0.595571	0.368446	0.157389	0.692822	0.803026	['O15439']	ABCC4
1420	sp|P52907|CAZA1_HUMAN	13	10	-2.91834	0.0696832	0.926138	1.08162	0.157495	-0.223896	0.802732	['P52907']	CAPZA1
3343	sp|Q9BXS6|NUSAP_HUMAN	5	3	#NAME?	0.0698109	0.54986	0.529031	0.15764	0.0557119	0.802335	['Q9BXS6']	NUSAP1
3675	sp|Q9NVU7|SDA1_HUMAN	9	4	#NAME?	0.0698226	0.600115	0.461248	0.15764	0.379696	0.802335	['Q9NVU7']	SDAD1
2923	sp|Q92783|STAM1_HUMAN	6	4	-15.9582	0.070083	0.480026	0.499884	0.158142	-0.0584794	0.800953	['Q92783']	STAM
1189	sp|P40818|UBP8_HUMAN	2	2	#NAME?	0.0703301	0.371356	0.334554	0.158614	0.150566	0.79966	['P40818']	USP8
3035	sp|Q96EM0|T3HPD_HUMAN	3	3	#NAME?	0.0705989	0.415823	0.421567	0.159134	-0.0197921	0.798237	['Q96EM0']	L3HYPDH
2727	sp|Q8NBM4|UBAC2_HUMAN	5	2	#NAME?	0.0709503	0.617385	0.629521	0.159839	-0.0280838	0.796316	['Q8NBM4']	UBAC2
2920	sp|Q92759|TF2H4_HUMAN	3	2	#NAME?	0.0710627	0.43392	0.625152	0.160006	-0.526776	0.795863	['Q92759']	GTF2H4
2578	sp|Q86UU1|PHLB1_HUMAN	6	4	#NAME?	0.071136	0.423149	0.562134	0.160085	-0.409749	0.79565	['Q86UU1']	PHLDB1
2542	sp|Q7Z5J4|RAI1_HUMAN	11	6	-17.4886	0.0713196	0.346427	0.2881	0.160411	0.265981	0.794765	['Q7Z5J4']	RAI1
3490	sp|Q9H7E9|CH033_HUMAN	4	2	#NAME?	0.0715018	0.378182	0.565316	0.160735	-0.579978	0.793891	['Q9H7E9']	C8orf33
692	sp|P09622|DLDH_HUMAN	14	6	-17.0706	0.0719041	1.11098	0.90011	0.161552	0.303654	0.791688	['P09622']	DLD
2292	sp|Q53S33|BOLA3_HUMAN	2	2	#NAME?	0.0724357	0.748572	0.487076	0.162659	0.619995	0.788723	['Q53S33']	BOLA3
326	sp|O75306|NDUS2_HUMAN	10	7	-112.337	0.0725835	0.67719	0.654466	0.162859	0.0492425	0.788187	['O75306']	NDUFS2
279	sp|O60573|IF4E2_HUMAN	2	2	#NAME?	0.0726032	0.386418	0.446348	0.162859	-0.208007	0.788187	['O60573']	EIF4E2
1403	sp|P52306|GDS1_HUMAN	6	6	-2.94574	0.0727163	0.375615	0.381828	0.163019	-0.0236667	0.787762	['P52306']	RAP1GDS1
3392	sp|Q9GZP9|DERL2_HUMAN	2	2	#NAME?	0.0727526	0.550241	0.515552	0.163019	0.0939455	0.787762	['Q9GZP9']	DERL2
4126	sp|Q9Y608|LRRF2_HUMAN	2	2	#NAME?	0.0729723	0.630192	0.765761	0.163423	-0.281103	0.786686	['Q9Y608']	LRRFIP2
1112	sp|P35080|PROF2_HUMAN	3	2	-6.51451	0.0731206	0.996861	0.651944	0.163664	0.612644	0.786046	['P35080']	PFN2
1298	sp|P49023|PAXI_HUMAN	6	3	-9.55944	0.0731583	0.28492	0.379636	0.163664	-0.414063	0.786046	['P49023']	PXN
86	sp|O14530|TXND9_HUMAN	5	5	-151.764	0.0733028	0.91256	1.09314	0.1639	-0.260484	0.785422	['O14530']	TXNDC9
3275	sp|Q9BT09|CNPY3_HUMAN	6	3	-1.14099	0.0739233	1.11478	0.900294	0.165113	0.308288	0.782219	['Q9BT09']	CNPY3
3583	sp|Q9NQ50|RM40_HUMAN	6	4	-18.0885	0.0739247	0.667374	0.674496	0.165113	-0.0153152	0.782219	['Q9NQ50']	MRPL40
803	sp|P14649|MYL6B_HUMAN	4	2	#NAME?	0.0741401	0.273264	0.314253	0.165505	-0.201634	0.781188	['P14649']	MYL6B
430	sp|O94915|FRYL_HUMAN	3	2	-8.48065	0.0741829	0.918239	0.560115	0.165512	0.713146	0.781169	['O94915']	FRYL
3298	sp|Q9BUP0|EFHD1_HUMAN	2	2	-5.06096	0.0743085	0.325119	1.15028	0.165704	-1.82295	0.780667	['Q9BUP0']	EFHD1
318	sp|O75153|CLU_HUMAN	18	10	-10.2795	0.0743962	0.252462	0.279998	0.165811	-0.149351	0.780387	['O75153']	CLUH
496	sp|O95747|OXSR1_HUMAN	11	7	-9.86705	0.0744637	0.466021	0.580593	0.165873	-0.317131	0.780225	['O95747']	OXSR1
408	sp|O76031|CLPX_HUMAN	20	12	3.03232	0.0745609	0.557213	0.534095	0.166001	0.0611335	0.779891	['O76031']	CLPX
3661	sp|Q9NV96|CC50A_HUMAN	7	3	4.58952	0.0747631	0.673063	0.543049	0.166362	0.30966	0.778946	['Q9NV96']	TMEM30A
3993	sp|Q9Y281|COF2_HUMAN	6	3	4.01916	0.0748539	0.225949	0.308876	0.166475	-0.451028	0.778651	['Q9Y281']	CFL2
2926	sp|Q92793|CBP_HUMAN	2	2	1.17837	0.0749336	0.586452	0.415438	0.166564	0.497377	0.77842	['Q92793']	CREBBP
2637	sp|Q8IXB1|DJC10_HUMAN	3	3	#NAME?	0.0752917	0.473823	0.367579	0.16727	0.366294	0.776581	['Q8IXB1']	DNAJC10
1220	sp|P42765|THIM_HUMAN	17	7	-3.01521	0.0754337	0.960886	1.04149	0.167497	-0.116213	0.775994	['P42765']	ACAA2
580	sp|P05091|ALDH2_HUMAN	16	7	-16.4947	0.0755238	0.278556	0.187489	0.167596	0.571163	0.775737	['P05091']	ALDH2
388	sp|O75844|FACE1_HUMAN	9	6	0.410872	0.0755588	1.05394	0.656593	0.167596	0.682722	0.775737	['O75844']	ZMPSTE24
1512	sp|P60866|RS20_HUMAN	3	2	0.947767	0.0756048	1.09672	0.907393	0.167609	0.273391	0.775704	['P60866']	RPS20
1927	sp|Q13405|RM49_HUMAN	5	3	2.92467	0.0757591	0.520632	0.381009	0.167862	0.450438	0.775049	['Q13405']	MRPL49
278	sp|O60568|PLOD3_HUMAN	10	6	-1.84397	0.0761121	0.630025	0.403936	0.168533	0.641281	0.773316	['O60568']	PLOD3
2798	sp|Q8TC07|TBC15_HUMAN	2	2	#NAME?	0.0761428	0.377816	0.533119	0.168533	-0.496773	0.773316	['Q8TC07']	TBC1D15
2508	sp|Q7L0J3|SV2A_HUMAN	3	2	-5.20295	0.0762447	1.0559	0.930085	0.168669	0.183034	0.772966	['Q7L0J3']	SV2A
2748	sp|Q8ND76|CCNY_HUMAN	2	2	#NAME?	0.0765094	0.412228	0.317056	0.169164	0.378707	0.771691	['Q8ND76']	CCNY
2096	sp|Q15042|RB3GP_HUMAN	3	3	#NAME?	0.0766368	0.374318	0.505172	0.169356	-0.432511	0.771198	['Q15042']	RAB3GAP1
3292	sp|Q9BU76|MMTA2_HUMAN	3	2	#NAME?	0.0768771	0.394608	0.56846	0.169797	-0.526638	0.770069	['Q9BU76']	MMTAG2
1924	sp|Q13362|2A5G_HUMAN	3	2	#NAME?	0.0776768	0.526333	0.515283	0.171454	0.0306085	0.765852	['Q13362']	PPP2R5C
3263	sp|Q9BRP8|WIBG_HUMAN	4	2	-141.095	0.0777095	0.976567	0.583993	0.171454	0.741769	0.765852	['Q9BRP8']	WIBG
1311	sp|P49448|DHE4_HUMAN	17	6	-6.54085	0.0777649	0.934664	1.07038	0.171486	-0.195597	0.765772	['P49448']	GLUD2
1169	sp|P38435|VKGC_HUMAN	4	2	#NAME?	0.0780128	0.480278	0.335184	0.171942	0.518917	0.764619	['P38435']	GGCX
6	sp|A3KMH1|VWA8_HUMAN	6	2	#NAME?	0.0783673	0.336242	0.586654	0.172632	-0.803011	0.76288	['A3KMH1']	VWA8
3916	sp|Q9ULA0|DNPEP_HUMAN	2	2	#NAME?	0.0789704	0.492751	0.347924	0.173868	0.502087	0.759779	['Q9ULA0']	DNPEP
1594	sp|P62487|RPB7_HUMAN	5	4	-151.764	0.0790956	0.642469	0.626021	0.174052	0.0374168	0.759321	['P62487']	POLR2G
3504	sp|Q9H8V3|ECT2_HUMAN	2	2	-13.3257	0.0793044	0.547659	0.906395	0.17442	-0.72686	0.758405	['Q9H8V3']	ECT2
3994	sp|Q9Y282|ERGI3_HUMAN	8	3	#NAME?	0.0793879	0.585339	0.396716	0.174511	0.561166	0.758177	['Q9Y282']	ERGIC3
667	sp|P08651|NFIC_HUMAN	4	2	#NAME?	0.079438	0.544876	0.380432	0.174529	0.51829	0.758132	['P08651']	NFIC
4165	sp|Q9Y6V7|DDX49_HUMAN	5	4	#NAME?	0.0794932	0.675735	0.444029	0.174558	0.605805	0.758059	['Q9Y6V7']	DDX49
2459	sp|Q6RFH5|WDR74_HUMAN	8	7	-8.46382	0.0796694	0.552345	0.477636	0.174853	0.209659	0.757326	['Q6RFH5']	WDR74
2751	sp|Q8NDI1|EHBP1_HUMAN	4	2	-122.045	0.0798349	0.70946	0.393212	0.175052	0.851415	0.756834	['Q8NDI1']	EHBP1
2520	sp|Q7L9L4|MOB1B_HUMAN;sp|Q9H8S9|MOB1A_HUMAN	4	2	-5.82308	0.0798436	0.938714	0.559934	0.175052	0.745428	0.756834	['Q7L9L4', 'Q9H8S9']	MOB1B
1962	sp|Q13596|SNX1_HUMAN	11	5	-8.08774	0.0801338	0.460312	0.420551	0.175595	0.130331	0.755487	['Q13596']	SNX1
2902	sp|Q92576|PHF3_HUMAN	8	4	-4.28874	0.0802819	0.341039	0.248887	0.175828	0.454448	0.754913	['Q92576']	PHF3
3727	sp|Q9NZ01|TECR_HUMAN	9	5	-1.23292	0.0804293	0.805761	1.22733	0.176058	-0.607094	0.754345	['Q9NZ01']	TECR
298	sp|O60869|EDF1_HUMAN	3	2	-19.8492	0.0808617	0.988317	1.00945	0.176879	-0.0305176	0.752323	['O60869']	EDF1
39	sp|O00193|SMAP_HUMAN	3	3	#NAME?	0.0808895	0.454202	0.402089	0.176879	0.175819	0.752323	['O00193']	SMAP
226	sp|O43716|GATC_HUMAN	4	2	#NAME?	0.0809538	0.495697	0.688142	0.176927	-0.473247	0.752205	['O43716']	GATC
2306	sp|Q5F1R6|DJC21_HUMAN	6	4	#NAME?	0.0813879	0.36667	0.549475	0.177783	-0.583571	0.75011	['Q5F1R6']	DNAJC21
3584	sp|Q9NQ55|SSF1_HUMAN	8	3	-6.94796	0.0820982	0.519649	0.667598	0.17924	-0.361443	0.746564	['Q9NQ55']	PPAN
4145	sp|Q9Y6D5|BIG2_HUMAN	4	3	-22.1322	0.0823384	0.593753	0.661961	0.179671	-0.156884	0.745522	['Q9Y6D5']	ARFGEF2
2286	sp|Q53GL0|PKHO1_HUMAN	2	2	#NAME?	0.0824537	0.59481	0.427887	0.179723	0.4752	0.745397	['Q53GL0']	PLEKHO1
892	sp|P19623|SPEE_HUMAN	4	3	-5.77442	0.0824728	0.506666	0.707749	0.179723	-0.482204	0.745397	['P19623']	SRM
1552	sp|P61764|STXB1_HUMAN	3	3	#NAME?	0.0824915	0.319175	0.397502	0.179723	-0.316613	0.745397	['P61764']	STXBP1
1346	sp|P50148|GNAQ_HUMAN	10	4	-11.0553	0.0827095	0.978188	1.02662	0.180104	-0.0697245	0.744477	['P50148']	GNAQ
3020	sp|Q96DA6|TIM14_HUMAN	3	3	-3.34901	0.0827547	0.537232	0.568031	0.180108	-0.0804262	0.744467	['Q96DA6']	DNAJC19
617	sp|P06899|H2B1J_HUMAN;sp|Q16778|H2B2E_HUMAN	8	5	-3.37204	0.0828744	1.0848	0.91973	0.180274	0.238146	0.744066	['P06899', 'Q16778']	HIST1H2BJ
2540	sp|Q7Z4V5|HDGR2_HUMAN	13	8	#NAME?	0.0829975	0.256466	0.224832	0.180439	0.18992	0.743669	['Q7Z4V5']	HDGFRP2
634	sp|P07737|PROF1_HUMAN	9	7	10.9316	0.0830367	0.918921	1.0819	0.180439	-0.235548	0.743669	['P07737']	PFN1
2764	sp|Q8NEY1|NAV1_HUMAN	2	2	#NAME?	0.0831779	0.29145	0.350841	0.180652	-0.267571	0.743157	['Q8NEY1']	NAV1
2981	sp|Q96AA3|RFT1_HUMAN	2	2	#NAME?	0.0833134	0.645453	0.705107	0.180852	-0.12753	0.742677	['Q96AA3']	RFT1
3060	sp|Q96G03|PGM2_HUMAN	15	7	-3.51234	0.0835895	0.436193	0.48257	0.181357	-0.145771	0.741465	['Q96G03']	PGM2
855	sp|P17693|HLAG_HUMAN	2	2	-5.69006	0.0837558	0.699391	0.284351	0.181623	1.29843	0.740828	['P17693']	HLA-G
3586	sp|Q9NQ86|TRI36_HUMAN	2	2	#NAME?	0.084333	0.526041	0.520833	0.18278	0.0143548	0.738072	['Q9NQ86']	TRIM36
1898	sp|Q13131|AAPK1_HUMAN	2	2	#NAME?	0.0845895	0.486298	0.499318	0.183241	-0.0381195	0.736978	['Q13131']	PRKAA1
467	sp|O95347|SMC2_HUMAN	29	16	-3.49058	0.0846491	0.387474	0.468701	0.183273	-0.274569	0.736902	['O95347']	SMC2
2117	sp|Q15185|TEBP_HUMAN	7	5	-3.91478	0.0846923	0.574096	0.467799	0.183273	0.295403	0.736902	['Q15185']	PTGES3
131	sp|O15020|SPTN2_HUMAN	13	5	#NAME?	0.0848216	0.199436	0.208083	0.183458	-0.0612331	0.736464	['O15020']	SPTBN2
2185	sp|Q16270|IBP7_HUMAN	4	3	-4.5827	0.0849436	0.618283	0.397642	0.183626	0.636797	0.736065	['Q16270']	IGFBP7
2846	sp|Q8WVB6|CTF18_HUMAN	2	2	#NAME?	0.0851735	0.484028	0.482154	0.184028	0.0055971	0.735117	['Q8WVB6']	CHTF18
2973	sp|Q969X6|CIR1A_HUMAN	10	7	-36.8714	0.085287	0.554433	0.477463	0.184178	0.215625	0.734763	['Q969X6']	CIRH1A
1271	sp|P47895|AL1A3_HUMAN	2	2	#NAME?	0.0853544	0.173637	0.232443	0.184228	-0.420804	0.734645	['P47895']	ALDH1A3
3897	sp|Q9UKK9|NUDT5_HUMAN	5	3	-11.2263	0.0857242	0.345131	0.692784	0.184801	-1.00526	0.733297	['Q9UKK9']	NUDT5
1282	sp|P48449|ERG7_HUMAN	9	5	#NAME?	0.0857289	0.529239	0.476354	0.184801	0.151886	0.733297	['P48449']	LSS
1069	sp|P30837|AL1B1_HUMAN	16	6	-0.843846	0.0857864	0.872443	1.14616	0.184801	-0.393673	0.733297	['P30837']	ALDH1B1
383	sp|O75794|CD123_HUMAN	4	3	0.479152	0.0858634	0.571166	0.543909	0.184801	0.0705454	0.733297	['O75794']	CDC123
1215	sp|P42566|EPS15_HUMAN	8	4	8.17165	0.0858731	0.298363	0.623081	0.184801	-1.06235	0.733297	['P42566']	EPS15
1302	sp|P49247|RPIA_HUMAN	3	2	-5.40004	0.0858858	0.464619	0.645988	0.184801	-0.475458	0.733297	['P49247']	RPIA
1123	sp|P35250|RFC2_HUMAN	8	5	-16.7172	0.0860451	0.962469	0.50731	0.185048	0.923874	0.732716	['P35250']	RFC2
3448	sp|Q9H3H3|CK068_HUMAN	2	2	#NAME?	0.0863092	0.985392	0.695106	0.18552	0.503465	0.731609	['Q9H3H3']	C11orf68
3751	sp|Q9P031|TAP26_HUMAN	4	3	-6.84558	0.0867443	0.358984	0.493934	0.18636	-0.460402	0.729648	['Q9P031']	CCDC59
722	sp|P10620|MGST1_HUMAN	2	2	#NAME?	0.0869916	0.524408	1.06615	0.186794	-1.02366	0.728636	['P10620']	MGST1
1621	sp|P62942|FKB1A_HUMAN	4	3	-2.5524	0.0871142	0.595091	0.699461	0.186928	-0.233133	0.728325	['P62942']	FKBP1A
2684	sp|Q8N3U4|STAG2_HUMAN	9	3	#NAME?	0.0871436	0.319239	0.398125	0.186928	-0.318586	0.728325	['Q8N3U4']	STAG2
2328	sp|Q5SRE5|NU188_HUMAN	12	4	-6.40513	0.0873769	0.294853	0.457569	0.187333	-0.633992	0.727387	['Q5SRE5']	NUP188
3474	sp|Q9H5Q4|TFB2M_HUMAN	6	3	#NAME?	0.0875099	0.480096	0.389368	0.187521	0.30219	0.72695	['Q9H5Q4']	TFB2M
304	sp|O75027|ABCB7_HUMAN	2	2	#NAME?	0.087712	0.552269	0.439239	0.187858	0.330365	0.726171	['O75027']	ABCB7
944	sp|P23193|TCEA1_HUMAN	9	3	-10.4326	0.0877852	0.5702	0.663847	0.187918	-0.219382	0.726032	['P23193']	TCEA1
15	sp|A6NFN3|RFOX3_HUMAN	4	3	-6.3603	0.0880848	0.597459	0.574901	0.188463	0.0555251	0.724775	['A6NFN3']	RBFOX3
153	sp|O15258|RER1_HUMAN	2	2	#NAME?	0.0881319	0.727583	0.495979	0.188467	0.552832	0.724765	['O15258']	RER1
1547	sp|P61513|RL37A_HUMAN	5	3	-4.73817	0.0883792	1.03598	0.966137	0.188899	0.100704	0.723771	['P61513']	RPL37A
293	sp|O60828|PQBP1_HUMAN	6	2	#NAME?	0.0887321	1.13488	0.86575	0.189556	0.390522	0.722263	['O60828']	PQBP1
882	sp|P19022|CADH2_HUMAN	13	7	-6.92416	0.0889112	0.41671	0.274695	0.189841	0.601216	0.72161	['P19022']	CDH2
2938	sp|Q92917|GPKOW_HUMAN	9	6	#NAME?	0.088995	0.463656	0.530867	0.189923	-0.195294	0.721423	['Q92917']	GPKOW
997	sp|P26885|FKBP2_HUMAN	8	3	-12.7193	0.0892309	0.357384	0.356558	0.190329	0.00333591	0.720495	['P26885']	FKBP2
358	sp|O75521|ECI2_HUMAN	7	4	#NAME?	0.0893062	0.578552	0.337164	0.190349	0.778997	0.72045	['O75521']	ECI2
3469	sp|Q9H4G4|GAPR1_HUMAN	2	2	#NAME?	0.0893315	0.937385	0.511074	0.190349	0.875108	0.72045	['Q9H4G4']	GLIPR2
123	sp|O14964|HGS_HUMAN	10	6	-28.4029	0.0896657	0.453273	0.366749	0.19089	0.305587	0.719218	['O14964']	HGS
560	sp|P04080|CYTB_HUMAN	7	4	0.0609784	0.0896769	0.918193	1.10454	0.19089	-0.26658	0.719218	['P04080']	CSTB
3398	sp|Q9GZT9|EGLN1_HUMAN	2	2	#NAME?	0.0897592	0.412492	0.548366	0.190967	-0.410776	0.719041	['Q9GZT9']	EGLN1
527	sp|P00403|COX2_HUMAN	4	3	-2.51692	0.0901078	0.784293	1.26183	0.191611	-0.68605	0.717579	['P00403']	MT-CO2
3886	sp|Q9UJY4|GGA2_HUMAN	4	2	#NAME?	0.0904299	0.438397	0.300089	0.192198	0.546848	0.716251	['Q9UJY4']	GGA2
1118	sp|P35237|SPB6_HUMAN	8	4	-5.18153	0.0907243	0.461299	0.727612	0.192726	-0.657468	0.715061	['P35237']	SERPINB6
946	sp|P23246|SFPQ_HUMAN	30	10	-4.76076	0.090786	0.893876	1.11912	0.192759	-0.32422	0.714986	['P23246']	SFPQ
1928	sp|Q13409|DC1I2_HUMAN	13	11	#NAME?	0.0912171	0.351894	0.465535	0.193575	-0.403748	0.71315	['Q13409']	DYNC1I2
104	sp|O14715|RGPD8_HUMAN;sp|Q99666|RGPD5_HUMAN	14	6	#NAME?	0.0913726	0.491388	0.451567	0.193708	0.121921	0.712852	['O14715', 'Q99666']	RGPD8
710	sp|P0DJD1|RGPD2_HUMAN	12	6	-35.5001	0.0913726	0.42844	0.409469	0.193708	0.0653377	0.712852	['P0DJD1']	RGPD2
976	sp|P25440|BRD2_HUMAN	7	4	#NAME?	0.0914343	0.493347	0.497394	0.19374	-0.011786	0.71278	['P25440']	BRD2
3535	sp|Q9HBH1|DEFM_HUMAN	2	2	#NAME?	0.091635	0.337565	0.414608	0.194067	-0.296583	0.712048	['Q9HBH1']	PDF
3455	sp|Q9H3U1|UN45A_HUMAN	12	5	#NAME?	0.0918043	0.267172	0.349403	0.194198	-0.387126	0.711756	['Q9H3U1']	UNC45A
737	sp|P11233|RALA_HUMAN	6	3	-12.8123	0.0918542	0.84378	1.18514	0.194198	-0.490122	0.711756	['P11233']	RALA
3283	sp|Q9BTE6|AASD1_HUMAN	2	2	0.940461	0.0918559	0.918243	1.08416	0.194198	-0.239628	0.711756	['Q9BTE6']	AARSD1
3606	sp|Q9NR28|DBLOH_HUMAN	7	2	-7.97501	0.091883	0.912677	0.523198	0.194198	0.802746	0.711756	['Q9NR28']	DIABLO
239	sp|O43818|U3IP2_HUMAN	7	3	#NAME?	0.0919307	0.326488	0.592555	0.1942	-0.859918	0.711751	['O43818']	RRP9
3383	sp|Q9C0C2|TB182_HUMAN	2	2	#NAME?	0.0923016	0.23483	0.275792	0.194885	-0.231964	0.710222	['Q9C0C2']	TNKS1BP1
2876	sp|Q8WXX5|DNJC9_HUMAN	8	4	-8.26798	0.092564	0.487117	0.271028	0.19534	0.845827	0.709209	['Q8WXX5']	DNAJC9
299	sp|O60870|KIN17_HUMAN	4	4	#NAME?	0.0928192	0.539058	0.512354	0.19578	0.0733019	0.708233	['O60870']	KIN
3815	sp|Q9UBV2|SE1L1_HUMAN	5	2	-5.76257	0.0929439	0.658541	0.423327	0.195943	0.637501	0.707869	['Q9UBV2']	SEL1L
2279	sp|Q4VXU2|PAP1L_HUMAN	5	4	-3.43741	0.0930403	0.89074	0.651649	0.195963	0.45091	0.707826	['Q4VXU2']	PABPC1L
2367	sp|Q5VU65|P210L_HUMAN	2	2	#NAME?	0.0930472	0.472555	0.46707	0.195963	0.0168423	0.707826	['Q5VU65']	NUP210L
3223	sp|Q99805|TM9S2_HUMAN	7	4	-156.536	0.0932346	0.543613	0.450364	0.196179	0.271489	0.707347	['Q99805']	TM9SF2
4008	sp|Q9Y2J4|AMOL2_HUMAN	4	2	#NAME?	0.0932604	0.429351	0.248376	0.196179	0.789632	0.707347	['Q9Y2J4']	AMOTL2
2879	sp|Q8WYH8|ING5_HUMAN	3	2	#NAME?	0.0932909	0.517238	0.484123	0.196179	0.0954537	0.707347	['Q8WYH8']	ING5
3593	sp|Q9NQR4|NIT2_HUMAN	5	4	-102.473	0.093359	0.610699	0.579901	0.196223	0.0746557	0.70725	['Q9NQR4']	NIT2
3731	sp|Q9NZ63|CI078_HUMAN	2	2	#NAME?	0.0935283	0.428333	0.471481	0.19648	-0.138469	0.706681	['Q9NZ63']	C9orf78
34	sp|O00161|SNP23_HUMAN	13	6	-8.26776	0.0937678	0.211783	0.306812	0.196811	-0.534772	0.705951	['O00161']	SNAP23
309	sp|O75122|CLAP2_HUMAN	7	4	-5.56009	0.0937881	0.150905	0.295966	0.196811	-0.971789	0.705951	['O75122']	CLASP2
3410	sp|Q9H0C8|ILKAP_HUMAN	2	2	#NAME?	0.0938274	0.339545	0.411546	0.196811	-0.27745	0.705951	['Q9H0C8']	ILKAP
3565	sp|Q9NP79|VTA1_HUMAN	3	2	#NAME?	0.0939527	0.423018	1.05828	0.196903	-1.32293	0.705748	['Q9NP79']	VTA1
1968	sp|Q13619|CUL4A_HUMAN	4	2	-6.82901	0.0939655	0.22668	0.383221	0.196903	-0.757517	0.705748	['Q13619']	CUL4A
2786	sp|Q8NI36|WDR36_HUMAN	13	9	-2.65704	0.0940247	0.700427	0.545468	0.196928	0.36074	0.705693	['Q8NI36']	WDR36
1434	sp|P53680|AP2S1_HUMAN	2	2	#NAME?	0.094076	0.412434	0.594715	0.196936	-0.528034	0.705674	['P53680']	AP2S1
374	sp|O75688|PPM1B_HUMAN	5	3	-10.1643	0.094671	0.578445	0.664161	0.198082	-0.199353	0.703154	['O75688']	PPM1B
1239	sp|P45973|CBX5_HUMAN	9	5	-10.6362	0.096067	0.315601	0.244938	0.200902	0.365682	0.697015	['P45973']	CBX5
3433	sp|Q9H270|VPS11_HUMAN	2	2	#NAME?	0.0961577	1.01123	0.525271	0.200991	0.944978	0.696823	['Q9H270']	VPS11
3842	sp|Q9UHA3|RLP24_HUMAN	3	2	#NAME?	0.0962438	0.556412	0.692345	0.201009	-0.31534	0.696785	['Q9UHA3']	RSL24D1
192	sp|O43264|ZW10_HUMAN	11	5	-6.81208	0.0962624	0.557549	0.482941	0.201009	0.207252	0.696785	['O43264']	ZW10
1251	sp|P46459|NSF_HUMAN	27	11	-7.74136	0.0963739	0.929656	1.07292	0.201141	-0.206777	0.6965	['P46459']	NSF
[truncated: 2,172 more rows]
